# Supplementary material for: Comparative efficacy analysis of anti-microbial peptides, LL-37 and indolicidin upon conjugation with CNT, in human monocytes
Source: PubMed Central journal article supplement (PMC5469186; doi:10.1186/s12951-017-0278-1), 2017-06-12
Supplement: 12951_2017_278_MOESM1_ESM.pdf [file 12951_2017_278_MOESM1_ESM.pdf]

**Table S1:** List of primers used to validate microarray through q-RT-PCR.

| <b>GENE NAME</b> | <b>FORWARD PRIMER</b>     | <b>REVERSE PRIMER</b>    | <b>NCBI SEQUENCE ACCESSION NUMBER</b> |
|------------------|---------------------------|--------------------------|---------------------------------------|
| <i>C-JUN</i>     | TTGGACTGGGTTGCGTCCTG      | CGAAAAGTCCAACGTTCCGTTTC  | NM_002228.3                           |
| <i>IKB1</i>      | GCTGCTGCTTCAGGCAATTCAGAG  | GTGCTTCAGCCACCAGTTCTTCAC | NM_001556.2                           |
| <i>IKBKG</i>     | ACCGTGCAGTCTGCGCTTTC      | GGCCGCATCTACCCCAAAG      | NM_003639.4                           |
| <i>IL1R</i>      | ATGCCACCGATTGCAGGACA      | CCCAGGAGAAAGCAGGTGGAA    | M27492.1                              |
| <i>IRAK1</i>     | GAAGCCCCTGGAAGGCAGAA      | CGTCACCAATGCCCAGCTTC     | NM_001569.3                           |
| <i>MAP2K7</i>    | ACTGGGAAGGACCGGGTGAG      | TTCTGCGCCTTTGGTGTGG      | NM_001297555.1                        |
| <i>MAP3K14</i>   | CCCTGGCCAGAGGGTACTGC      | AGGCTAAGCTGGGGCAATGG     | NM_003954.4                           |
| <i>MAPK10</i>    | CATCCCAACTTTTCCGGTAGGC    | CCAAGTGCACCAAGGAAGC      | NM_138980.3                           |
| <i>MYD88</i>     | TCTGTCTGCCTGTCCATGACTTC   | CCCAGAGCTATGCTTCACCATTTC | NM_001172567.1                        |
| <i>RELA</i>      | ATGCAGTTGCGGAGACCTTCTGAC  | GGTGCCATTGAGGCATGATGTGAC | NM_002908.2                           |
| <i>RIPK2</i>     | GATATACCTCACCGAGCACGTATG  | GGTGTATCCCAACTGTGATTTCC  | NM_003821.5                           |
| <i>TAB1</i>      | AGCCTCTGGGGTGCTTGGC       | CGAGGACCCTGGGCTGAGAC     | U49928.1                              |
| <i>TAK1</i>      | AAGCTAGGATCGCCGCAACC      | AGGGGTCCATGGATGACTTCG    | AF218074.1                            |
| <i>TNFRSF1</i>   | TCATGCCCGTTTTGGGTGTC      | GCTGAAGGCCCCATTGTTCC     | NM_001065.3                           |
| <i>TRADD</i>     | TGGTGGAGGCACTCGAGGAG      | CGTGGATGGACAGGGGTTCA     | NM_003789.3                           |
| <i>TRAF2</i>     | TCTGGCCCCTGGAGAGAAGG      | TTACCCGCAGGCTGTGCTGT     | NM_021138.3                           |
| <i>TRAF6</i>     | ACCATCAAATCCGGGAGCTGACTG  | CCAAGGGAGGTGGCTGTCATATTC | NM_145803.1                           |
| <i>IL6</i>       | GAACAAGCCAGAGCTGTGCAGATG  | TAAGTTCTGTGCCCAGTGGACAGG | NM_000600.3                           |
| <i>IL10</i>      | GGCATCTACAAAGCCATGAGTGAG  | TCAACAGCTAGAAAGCGTGGTCAG | NM_000572.2                           |
| <i>IL12</i>      | TCTTGAGCGAATGGGCATCTGTG   | TGAAGGCCCATGGCAACTTGAGAG | NM_002187.2                           |
| <i>IFNA</i>      | CGTGCTGGTACTCAGCTACAAATC  | GGCACAAGGGCTGTATTTCTTCTC | NM_021057.2                           |
| <i>IFNB1</i>     | TAGTAGGCGACACTGTTTCGTGTTG | TGGCCTTCAGGTAATGCAGAATCC | NM_002176.2                           |
| <i>TNFA</i>      | CTGTAGCCCATGTTGTAGCAAACC  | CAGGGCAATGATCCCAAAGTAGAC | NM_000594.2                           |
| <i>NFKB1</i>     | TGGAGGCGGAGGCATGTTTGGTAG  | TTCACGTCTCCTGTACCCGAGTAG | NM_003998.3                           |
