# Supplementary material for: Comparative efficacy analysis of anti-microbial peptides, LL-37 and indolicidin upon conjugation with CNT, in human monocytes
Source: PubMed Central journal article supplement (PMC5469186; doi:10.1186/s12951-017-0278-1), 2017-06-12
Supplement: 12951_2017_278_MOESM2_ESM.pdf [file 12951_2017_278_MOESM2_ESM.pdf]

**Table S2: Gene expression in terms of fold changes following treatment with free LL37, conjugates and other relevant controls**

| ENTREZ ID | Fold Change Values |         |          |          | Gene Symbol |
|-----------|--------------------|---------|----------|----------|-------------|
|           | CNT                | LL37-20 | CNT-LL37 | CNT+LL37 |             |
| 503538    | 1.0                | 1.0     | 1.0      | 1.0      | A1BG-AS1    |
| 29974     | 1.0                | -2.5    | -2.6     | -2.3     | A1CF        |
| 87769     | 1.0                | 1.0     | 1.0      | 1.0      | A2LD1       |
| 144568    | -1.6               | 1.0     | 1.0      | -5.6     | A2ML1       |
| 53947     | 1.0                | 1.0     | -2.6     | 1.0      | A4GALT      |
| 51146     | 1.0                | 3.6     | 1.0      | 1.0      | A4GNT       |
| 79719     | 1.0                | 1.0     | 1.0      | 1.0      | AAGAB       |
| 57505     | 1.0                | 1.0     | 5.8      | 5.7      | AARS2       |
| 10349     | -18.0              | -5.0    | -4.4     | -3.4     | ABCA10      |
| 20        | 1.0                | 1.0     | 1.0      | 2.5      | ABCA2       |
| 21        | 1.0                | 1.0     | 1.0      | 2.2      | ABCA3       |
| 24        | 1.0                | -3.7    | -3.8     | 1.0      | ABCA4       |
| 23460     | 1.0                | 1.0     | 1.0      | 1.0      | ABCA6       |
| 10350     | 1.0                | 1.0     | 1.0      | 1.0      | ABCA9       |
| 23456     | -13.4              | 1.0     | -5.2     | 1.0      | ABCB10      |
| 340273    | 1.0                | 1.0     | 1.0      | -4.6     | ABCB5       |
| 22        | 23.7               | 1.0     | 1.0      | 1.0      | ABCB7       |
| 150000    | 3.5                | -3.2    | -3.6     | -4.6     | ABCC13      |
| 1244      | 1.0                | 1.0     | 1.0      | 4.8      | ABCC2       |
| 8714      | 1.0                | 1.0     | 1.0      | 1.0      | ABCC3       |
| 10057     | 1.0                | 1.0     | 1.0      | 1.0      | ABCC5       |
| 10060     | -28.7              | 1.0     | 1.0      | 1.0      | ABCC9       |
| 215       | 1.0                | 1.0     | 3.1      | 4.2      | ABCD1       |
| 5825      | 4.3                | -3.1    | -2.7     | -2.9     | ABCD3       |
| 23        | 1.0                | 1.0     | 1.0      | 1.0      | ABCF1       |
| 9619      | 4.8                | 1.0     | 1.0      | 7.1      | ABCG1       |
| 9429      | 5.8                | 1.0     | 1.0      | 7.2      | ABCG2       |
| 84696     | 1.0                | 1.0     | 1.0      | 1.0      | ABHD1       |
| 140701    | 1.0                | 1.0     | 1.0      | 1.7      | ABHD16B     |
| 57406     | 1.0                | 1.0     | 1.0      | 1.0      | ABHD6       |
| 25890     | 1.0                | -4.6    | -6.6     | -4.2     | ABI3BP      |
| 25        | 1.0                | 1.0     | 1.0      | 1.0      | ABL1        |
| 27        | 1.9                | -7.6    | -11.8    | -14.0    | ABL2        |
| 3983      | 1.0                | 1.0     | 1.0      | 1.0      | ABLIM1      |
| 22885     | 1.0                | 1.0     | 1.0      | 1.0      | ABLIM3      |
| 28        | 1.0                | -1.5    | -1.9     | 1.0      | ABO         |
| 29        | 1.0                | 1.0     | -2.6     | -2.7     | ABR         |
| 137735    | 2.1                | -2.7    | 1.0      | 1.0      | ABRA        |
| 80325     | 1.0                | 1.0     | 1.0      | 1.0      | ABTB1       |
| 10449     | 1.0                | 1.0     | 1.0      | -4.1     | ACAA2       |
| 27034     | 1.0                | 1.0     | 2.1      | 1.0      | ACAD8       |
| 28976     | 3.3                | 1.0     | 1.0      | 1.0      | ACAD9       |
| 33        | -2.2               | 1.0     | 1.0      | 1.0      | ACADL       |
| 37        | -1.7               | 1.0     | 1.0      | 1.0      | ACADVL      |

|        |       |      |       |      |        |
|--------|-------|------|-------|------|--------|
| 176    | 1.0   | 1.0  | 2.1   | 1.0  | ACAN   |
| 9744   | 1.0   | 3.2  | 2.1   | 1.0  | ACAP1  |
| 38     | 1.0   | 1.0  | -2.9  | 1.0  | ACAT1  |
| 79777  | 1.0   | 1.0  | 1.0   | 1.0  | ACBD4  |
| 91452  | 1.0   | 1.0  | 1.0   | 1.0  | ACBD5  |
| 414149 | 1.0   | 1.0  | 1.0   | 1.0  | ACBD7  |
| 84680  | -5.0  | 1.0  | 2.8   | 1.0  | ACCS   |
| 65057  | 1.0   | 1.0  | 1.0   | 1.0  | ACD    |
| 22985  | -3.3  | 1.0  | 1.0   | -5.4 | ACIN1  |
| 641371 | 1.0   | 1.0  | 1.0   | 1.0  | ACOT1  |
| 26027  | 1.0   | 1.6  | 1.0   | 1.0  | ACOT11 |
| 55856  | 1.0   | -2.5 | -2.7  | 1.0  | ACOT13 |
| 10005  | 2.8   | 1.0  | 1.0   | 1.0  | ACOT8  |
| 23597  | 1.0   | 1.0  | 2.0   | 1.0  | ACOT9  |
| 8310   | -12.7 | 1.0  | 1.0   | -4.7 | ACOX3  |
| 55289  | 1.0   | 1.0  | -10.3 | 1.0  | ACOXL  |
| 52     | 1.0   | 1.0  | 1.0   | 1.0  | ACP1   |
| 53     | -2.0  | 1.0  | -1.6  | 1.0  | ACP2   |
| 92370  | 1.0   | 1.0  | 1.0   | 1.0  | ACPL2  |
| 55     | 2.1   | -4.9 | -3.6  | 1.0  | ACPP   |
| 80221  | 1.0   | 1.0  | -3.2  | 1.0  | ACSF2  |
| 197322 | 1.7   | 1.0  | 1.9   | 1.0  | ACSF3  |
| 2182   | 1.0   | 1.0  | 6.4   | 1.0  | ACSL4  |
| 51703  | 1.0   | 1.0  | 1.0   | 3.2  | ACSL5  |
| 116285 | 1.0   | 1.0  | -2.3  | -2.4 | ACSM1  |
| 54988  | 1.0   | 1.0  | -4.9  | -4.2 | ACSM5  |
| 84532  | 6.8   | 1.0  | 1.0   | 1.0  | ACSS1  |
| 55902  | 1.0   | 1.0  | 1.9   | 1.0  | ACSS2  |
| 79611  | 1.0   | 1.0  | 1.0   | 1.0  | ACSS3  |
| 58     | -5.1  | 2.8  | 2.7   | 3.1  | ACTA1  |
| 60     | 1.0   | -3.2 | -3.3  | -3.2 | ACTB   |
| 86     | 1.0   | 1.0  | 1.0   | 1.0  | ACTL6A |
| 88     | 1.0   | 3.4  | 1.0   | 1.0  | ACTN2  |
| 81     | -6.8  | 1.0  | 3.3   | 1.0  | ACTN4  |
| 10121  | 2.0   | 1.0  | 1.0   | 1.0  | ACTR1A |
| 10120  | 1.0   | 1.0  | 1.0   | 1.0  | ACTR1B |
| 57180  | -1.6  | 1.0  | -7.7  | 1.0  | ACTR3B |
| 140625 | 1.0   | 1.0  | 1.0   | 1.0  | ACTRT2 |
| 90     | -2.1  | 1.0  | 1.0   | -5.7 | ACVR1  |
| 130399 | 2.6   | 1.0  | 1.0   | 1.0  | ACVR1C |
| 93     | -2.1  | 1.0  | 1.0   | 1.0  | ACVR2B |
| 95     | 2.0   | 1.0  | 1.0   | 1.0  | ACY1   |
| 132612 | 1.0   | 1.0  | 1.0   | 1.0  | ADAD1  |
| 161931 | 1.0   | 2.8  | 1.0   | 1.0  | ADAD2  |
| 161823 | 1.0   | 2.7  | 1.0   | 1.0  | ADAL   |
| 4185   | 1.0   | 1.0  | 1.0   | 1.0  | ADAM11 |
| 8728   | 1.0   | 1.0  | 1.0   | 3.5  | ADAM19 |
| 8747   | 1.0   | 6.0  | 6.5   | 6.7  | ADAM21 |

|        |      |      |      |      |            |
|--------|------|------|------|------|------------|
| 53616  | 1.0  | 1.0  | 1.0  | 2.6  | ADAM22     |
| 8745   | 1.0  | 1.0  | 1.0  | 1.0  | ADAM23     |
| 11086  | 1.0  | 1.0  | -3.1 | 1.0  | ADAM29     |
| 11085  | 1.0  | -6.7 | -4.5 | 1.0  | ADAM30     |
| 203102 | 6.3  | 1.6  | 1.0  | 1.0  | ADAM32     |
| 80332  | 1.0  | 1.0  | 1.0  | -4.9 | ADAM33     |
| 8756   | 1.0  | 1.0  | 1.0  | 2.1  | ADAM7      |
| 8754   | 1.0  | 1.0  | -5.7 | 1.0  | ADAM9      |
| 81792  | 1.0  | 1.0  | -3.8 | 1.0  | ADAMTS12   |
| 170689 | 1.0  | 1.0  | 1.0  | 1.0  | ADAMTS15   |
| 170690 | 5.8  | 1.0  | 1.0  | 1.0  | ADAMTS16   |
| 170691 | 4.2  | 8.8  | 1.0  | 1.0  | ADAMTS17   |
| 9508   | 1.0  | 1.0  | 1.0  | -5.4 | ADAMTS3    |
| 92949  | 1.0  | 1.0  | 1.0  | 1.0  | ADAMTSL1   |
| 9719   | 1.0  | 1.0  | 1.0  | 1.0  | ADAMTSL2   |
| 57188  | 1.0  | 1.0  | 1.0  | 2.8  | ADAMTSL3   |
| 54507  | 1.0  | 1.5  | 1.0  | 1.0  | ADAMTSL4   |
| 339366 | 2.1  | 1.0  | 1.0  | 1.0  | ADAMTSL5   |
| 11033  | 1.0  | 1.0  | 1.0  | 1.0  | ADAP1      |
| 55803  | 1.0  | 1.0  | -3.5 | 1.0  | ADAP2      |
| 104    | 1.0  | -6.3 | 1.0  | 1.0  | ADARB1     |
| 105    | 1.0  | 4.8  | 3.0  | 3.2  | ADARB2     |
| 642394 | 1.0  | 1.0  | 1.0  | 1.0  | ADARB2-AS1 |
| 113451 | 1.0  | -4.1 | -4.1 | 1.0  | ADC        |
| 108    | -4.5 | 1.0  | 1.0  | 2.9  | ADCY2      |
| 117    | 1.0  | 1.0  | 1.0  | 1.0  | ADCYAP1R1  |
| 119    | -2.2 | 1.0  | -5.0 | 1.0  | ADD2       |
| 120    | -2.3 | 1.0  | 1.0  | 1.0  | ADD3       |
| 127    | 1.0  | 1.0  | 1.0  | 1.0  | ADH4       |
| 55256  | 1.0  | 1.0  | -2.2 | -1.6 | ADI1       |
| 149685 | 1.0  | 4.8  | 3.7  | 1.0  | ADIG       |
| 9370   | 1.0  | 1.0  | 2.5  | 1.0  | ADIPOQ     |
| 51094  | -1.8 | 1.0  | -2.4 | -2.4 | ADIPOR1    |
| 79602  | 1.0  | 3.8  | 1.0  | 1.0  | ADIPOR2    |
| 132    | 2.3  | 1.0  | 1.0  | 1.0  | ADK        |
| 133    | 1.0  | 1.0  | 1.0  | 1.0  | ADM        |
| 84890  | 15.8 | 1.0  | 1.0  | 1.0  | ADO        |
| 134    | 1.0  | 1.0  | 2.4  | 1.0  | ADORA1     |
| 136    | 1.0  | 1.0  | 5.7  | 5.0  | ADORA2B    |
| 140    | 2.0  | 1.0  | 1.0  | 1.0  | ADORA3     |
| 83440  | 1.0  | 1.0  | 1.0  | 1.0  | ADPGK      |
| 54936  | 1.0  | -4.3 | 1.0  | 1.0  | ADPRHL2    |
| 153    | 1.0  | 1.0  | 1.0  | 1.0  | ADRB1      |
| 157    | 1.0  | 1.0  | 4.3  | 1.0  | ADRBK2     |
| 134265 | 1.0  | -3.4 | 1.0  | -5.8 | AFAP1L1    |
| 4299   | 1.0  | 1.0  | 1.0  | -3.8 | AFF1       |
| 2334   | 1.0  | 3.6  | 2.9  | 6.0  | AFF2       |
| 3899   | 1.0  | 1.0  | 1.0  | 1.0  | AFF3       |

|        |       |       |       |      |         |
|--------|-------|-------|-------|------|---------|
| 27125  | 5.6   | 1.0   | 2.4   | 1.0  | AFF4    |
| 172    | -2.9  | 1.0   | -6.4  | 1.0  | AFG3L1P |
| 125061 | 1.0   | 1.0   | 1.0   | 1.0  | AFMID   |
| 116988 | 2.6   | 2.8   | 1.0   | 1.0  | AGAP3   |
| 653268 | 1.0   | 1.0   | 1.0   | 1.0  | AGAP7   |
| 340351 | 1.0   | 1.0   | 1.0   | 1.0  | AGBL3   |
| 3268   | 1.0   | 1.0   | 4.7   | 4.2  | AGFG2   |
| 392636 | 1.0   | 1.0   | 1.0   | 1.0  | AGMO    |
| 10555  | 1.0   | 2.9   | 1.0   | 1.0  | AGPAT2  |
| 56895  | 1.0   | 6.1   | 4.1   | 1.0  | AGPAT4  |
| 137964 | 1.0   | 1.0   | 1.0   | 1.0  | AGPAT6  |
| 8540   | 3.3   | 1.0   | 1.5   | 1.0  | AGPS    |
| 10551  | 1.0   | 1.0   | 1.0   | 1.0  | AGR2    |
| 181    | 1.0   | 2.7   | 1.0   | 1.0  | AGRP    |
| 186    | 1.0   | 1.0   | 1.0   | 1.0  | AGTR2   |
| 57085  | 1.0   | 1.0   | 1.0   | 1.0  | AGTRAP  |
| 85007  | 1.0   | 1.0   | -5.8  | 1.0  | AGXT2L2 |
| 25909  | 1.0   | 1.0   | 1.0   | 1.0  | AHCTF1  |
| 10768  | 1.0   | 1.0   | 1.0   | 1.0  | AHCYL1  |
| 23382  | 1.5   | 1.0   | 1.0   | 1.0  | AHCYL2  |
| 54806  | 1.8   | 1.0   | 1.0   | 1.0  | AHI1    |
| 79026  | 1.0   | -2.5  | 1.0   | -2.6 | AHNAK   |
| 113146 | 1.0   | 1.0   | 3.2   | 1.0  | AHNAK2  |
| 57379  | 1.0   | 1.0   | 1.0   | 1.0  | AICDA   |
| 9255   | -2.7  | 1.0   | 1.0   | 1.0  | AIMP1   |
| 203    | 1.0   | 1.0   | 1.0   | -6.1 | AK1     |
| 204    | 1.0   | 1.0   | -4.8  | 1.0  | AK2     |
| 50808  | -17.6 | 1.0   | 1.0   | 1.0  | AK3     |
| 26289  | 1.0   | 1.0   | 1.0   | 1.0  | AK5     |
| 8165   | 1.0   | 1.0   | 1.0   | 1.0  | AKAP1   |
| 11215  | 1.0   | -7.7  | -6.4  | 1.0  | AKAP11  |
| 9590   | -2.2  | -3.6  | -3.4  | -3.1 | AKAP12  |
| 11214  | -3.3  | 1.0   | 1.0   | 1.0  | AKAP13  |
| 10566  | 1.0   | 6.7   | 3.1   | 1.0  | AKAP3   |
| 8852   | 1.0   | 1.0   | 1.0   | 1.0  | AKAP4   |
| 9495   | 1.0   | 1.0   | 1.0   | 1.0  | AKAP5   |
| 9472   | 1.0   | 1.0   | -2.8  | 1.0  | AKAP6   |
| 9465   | 1.0   | 1.0   | 1.0   | 1.0  | AKAP7   |
| 10142  | 1.0   | 1.0   | 1.0   | 1.0  | AKAP9   |
| 221264 | 1.0   | 1.0   | 1.0   | 1.0  | AKD1    |
| 80709  | 1.0   | -13.0 | -14.8 | -7.3 | AKNA    |
| 254268 | 1.0   | 1.0   | -7.3  | 1.0  | AKNAD1  |
| 231    | 1.0   | 2.6   | 2.6   | 2.7  | AKR1B1  |
| 1645   | -1.8  | -4.0  | -1.7  | 1.0  | AKR1C1  |
| 83592  | 1.0   | 1.0   | 1.0   | 1.0  | AKR1E2  |
| 208    | 2.2   | -3.1  | 1.0   | 1.0  | AKT2    |
| 10000  | 1.0   | 1.0   | 1.0   | 1.0  | AKT3    |
| 211    | 3.4   | 1.0   | -3.4  | -4.9 | ALAS1   |

|        |      |      |      |      |          |
|--------|------|------|------|------|----------|
| 212    | 1.0  | 1.0  | 1.0  | 1.0  | ALAS2    |
| 219    | 1.7  | 1.0  | 1.0  | 1.0  | ALDH1B1  |
| 10840  | 1.0  | 1.0  | 5.0  | 1.6  | ALDH1L1  |
| 224    | 1.0  | 1.0  | -4.0 | 1.0  | ALDH3A2  |
| 7915   | 1.0  | 1.0  | 1.0  | 1.0  | ALDH5A1  |
| 4329   | 1.0  | -2.9 | 1.0  | 1.0  | ALDH6A1  |
| 223    | 1.0  | 1.0  | -4.3 | 1.0  | ALDH9A1  |
| 228    | 1.0  | -3.4 | 1.0  | -3.0 | ALDOAP2  |
| 229    | 1.0  | 1.0  | 1.0  | 1.9  | ALDOB    |
| 56052  | 12.3 | 7.8  | 1.0  | 1.0  | ALG1     |
| 79868  | 1.5  | 1.0  | -2.3 | -2.3 | ALG13    |
| 29880  | 1.0  | 1.0  | 1.0  | 1.0  | ALG5     |
| 29929  | 1.0  | 1.0  | 3.0  | 1.0  | ALG6     |
| 221120 | 1.0  | 1.0  | 1.0  | 1.0  | ALKBH3   |
| 54784  | 1.0  | 1.0  | 1.0  | 1.0  | ALKBH4   |
| 54890  | 1.0  | 1.0  | 5.8  | 1.0  | ALKBH5   |
| 84964  | 1.0  | -2.4 | -2.4 | 1.0  | ALKBH6   |
| 91801  | 1.5  | 1.0  | -3.0 | 1.0  | ALKBH8   |
| 245    | 1.0  | 1.0  | 1.0  | 1.0  | ALOX12P2 |
| 240    | 1.0  | 1.0  | 6.0  | 1.0  | ALOX5    |
| 80216  | 1.0  | 1.0  | 2.5  | 1.0  | ALPK1    |
| 115701 | 5.9  | 1.0  | 7.0  | 5.1  | ALPK2    |
| 57538  | 1.0  | 1.0  | -4.2 | 1.0  | ALPK3    |
| 249    | -1.6 | 5.3  | 1.0  | 1.0  | ALPL     |
| 57679  | 1.8  | 1.0  | 5.2  | 1.0  | ALS2     |
| 130540 | 1.0  | 1.0  | 1.0  | 1.0  | ALS2CR12 |
| 60529  | 1.5  | 2.0  | 1.8  | 1.0  | ALX4     |
| 23600  | -1.6 | -4.3 | 1.0  | 1.0  | AMACR    |
| 262    | 1.8  | 1.0  | 1.0  | 1.0  | AMD1     |
| 267    | 1.0  | 1.0  | 1.0  | 1.0  | AMFR     |
| 268    | 1.0  | 1.0  | 1.0  | 1.0  | AMH      |
| 120425 | 1.0  | 1.0  | 1.0  | 1.0  | AMICA1   |
| 57463  | 1.0  | -2.7 | 1.0  | 1.0  | AMIGO1   |
| 83607  | 1.0  | 1.0  | 1.0  | 1.0  | AMMECR1L |
| 154796 | 1.0  | 3.5  | -4.9 | 1.0  | AMOT     |
| 51421  | 1.0  | -1.8 | 1.0  | 1.0  | AMOTL2   |
| 271    | 1.6  | 1.0  | 1.0  | 1.0  | AMPD2    |
| 275    | 1.0  | 1.0  | 1.0  | 2.7  | AMT      |
| 51321  | 1.0  | 1.0  | 3.8  | 1.0  | AMZ2     |
| 201283 | 1.0  | 1.0  | 1.0  | 1.0  | AMZ2P1   |
| 64682  | 1.0  | 1.0  | -2.4 | -2.9 | ANAPC1   |
| 51529  | -2.4 | 1.0  | 1.0  | 1.0  | ANAPC11  |
| 25847  | 1.0  | 1.0  | -3.1 | 1.0  | ANAPC13  |
| 29945  | 1.0  | 1.0  | 1.0  | 1.5  | ANAPC4   |
| 51434  | 1.0  | -5.5 | 1.0  | 1.0  | ANAPC7   |
| 23357  | 1.0  | 1.0  | 1.0  | 1.0  | ANGEL1   |
| 285    | 1.0  | 1.0  | 1.0  | 1.0  | ANGPT2   |
| 23452  | 1.6  | 1.0  | -1.6 | 1.0  | ANGPTL2  |

|        |       |      |      |       |            |
|--------|-------|------|------|-------|------------|
| 253935 | 1.0   | 1.0  | 1.0  | 1.0   | ANGPTL5    |
| 288    | 10.1  | -3.3 | 3.5  | 2.6   | ANK3       |
| 150709 | 1.0   | 1.0  | -7.6 | -6.7  | ANKAR      |
| 162282 | 1.0   | 1.0  | 1.0  | 1.0   | ANKFN1     |
| 51479  | 1.0   | 2.6  | 3.3  | 1.0   | ANKFY1     |
| 126549 | 1.0   | 1.0  | 1.0  | 1.0   | ANKLE1     |
| 23141  | 1.0   | -4.3 | -5.6 | -5.3  | ANKLE2     |
| 51281  | 1.0   | 2.6  | 2.6  | 1.0   | ANKMY1     |
| 55608  | 1.0   | -2.5 | 1.0  | 1.0   | ANKRD10    |
| 29123  | 1.0   | 1.0  | 1.0  | 1.0   | ANKRD11    |
| 23253  | -2.1  | 1.0  | 1.0  | -4.8  | ANKRD12    |
| 81573  | 1.0   | 1.0  | -6.6 | 1.0   | ANKRD13C   |
| 54522  | 4.1   | 1.0  | 1.0  | 1.0   | ANKRD16    |
| 26057  | 1.0   | 1.0  | 1.0  | 1.0   | ANKRD17    |
| 253650 | 12.5  | 1.0  | 1.0  | 1.0   | ANKRD18A   |
| 441459 | 1.0   | -5.5 | 1.0  | 1.0   | ANKRD18B   |
| 138649 | 1.0   | 1.0  | -3.5 | 1.0   | ANKRD19P   |
| 26287  | 1.0   | 1.0  | -3.5 | 1.0   | ANKRD2     |
| 441430 | -3.5  | 1.0  | 1.0  | 1.0   | ANKRD20A2  |
| 440482 | -2.6  | 2.5  | -5.6 | 1.0   | ANKRD20A5P |
| 284232 | -21.3 | -7.8 | -8.2 | -9.0  | ANKRD20A9P |
| 118932 | 1.0   | 1.0  | 1.0  | -24.7 | ANKRD22    |
| 200539 | 1.0   | -3.2 | -3.4 | 1.0   | ANKRD23    |
| 170961 | 1.0   | 1.0  | 1.0  | 1.0   | ANKRD24    |
| 23243  | 4.1   | -7.4 | -7.4 | 1.0   | ANKRD28    |
| 147463 | 1.0   | 1.0  | 1.0  | 2.7   | ANKRD29    |
| 91074  | 1.0   | 1.0  | 1.0  | 1.0   | ANKRD30A   |
| 374860 | 1.0   | -2.9 | 1.0  | 1.0   | ANKRD30B   |
| 149992 | 1.0   | 1.0  | 1.0  | 1.0   | ANKRD30BP2 |
| 256006 | 1.0   | 1.0  | -7.2 | 1.0   | ANKRD31    |
| 148741 | 2.0   | 1.0  | 1.0  | 1.0   | ANKRD35    |
| 57730  | 2.2   | -7.0 | -2.4 | -3.2  | ANKRD36B   |
| 84832  | 1.0   | 1.0  | -4.4 | 1.0   | ANKRD36BP1 |
| 157567 | 1.6   | 1.0  | 4.9  | 1.0   | ANKRD46    |
| 79998  | 1.0   | 1.0  | 1.0  | 1.0   | ANKRD53    |
| 129138 | 1.0   | 1.0  | 3.3  | 3.4   | ANKRD54    |
| 56311  | 1.0   | 1.0  | 1.0  | 1.0   | ANKRD7     |
| 56899  | 1.0   | -2.7 | -4.9 | -3.1  | ANKS1B     |
| 124401 | 1.0   | 1.0  | 1.0  | 1.0   | ANKS3      |
| 55139  | 5.3   | 1.0  | 1.0  | 1.0   | ANKZF1     |
| 57101  | 1.0   | 1.0  | 1.0  | 1.0   | ANO2       |
| 50636  | 1.0   | 3.4  | 1.0  | -4.8  | ANO7       |
| 338440 | 1.0   | 1.0  | 1.0  | -2.8  | ANO9       |
| 8125   | 1.0   | 1.0  | 1.0  | -6.4  | ANP32A     |
| 23519  | 1.0   | -2.0 | 1.0  | 1.0   | ANP32D     |
| 302    | 1.0   | 2.5  | 2.5  | 1.0   | ANXA2      |
| 308    | -1.7  | 1.0  | 1.0  | 1.0   | ANXA5      |
| 314    | 1.0   | 1.0  | 1.0  | 1.0   | AOC2       |

|        |       |      |      |      |          |
|--------|-------|------|------|------|----------|
| 90586  | 1.0   | 1.0  | 1.0  | 1.0  | AOC4     |
| 316    | 1.0   | 4.4  | 1.0  | 1.0  | AOX1     |
| 164    | 1.0   | 1.0  | 3.0  | 1.0  | AP1G1    |
| 8907   | 1.0   | 3.0  | 1.0  | 1.0  | AP1M1    |
| 1174   | 1.0   | 2.1  | 1.0  | 1.0  | AP1S1    |
| 8905   | 1.0   | 1.0  | -6.0 | 1.0  | AP1S2    |
| 160    | -17.0 | 1.0  | 1.0  | 1.0  | AP2A1    |
| 161    | 1.0   | -4.0 | 1.0  | 1.0  | AP2A2    |
| 8120   | 1.0   | 1.0  | 4.4  | 5.2  | AP3B2    |
| 26985  | 1.0   | -4.4 | 1.0  | 1.0  | AP3M1    |
| 1176   | 1.0   | 1.0  | 1.0  | 1.0  | AP3S1    |
| 10239  | 1.0   | -5.8 | 1.0  | 1.0  | AP3S2    |
| 10717  | 1.0   | 1.0  | 1.0  | -1.7 | AP4B1    |
| 23431  | 1.0   | 1.0  | 1.0  | 1.0  | AP4E1    |
| 9179   | 1.0   | -4.4 | 1.0  | 1.0  | AP4M1    |
| 9546   | 1.0   | 1.0  | 4.3  | 1.0  | APBA3    |
| 10307  | 1.0   | 1.0  | -2.5 | 1.0  | APBB3    |
| 328    | 1.0   | 1.0  | 1.0  | 1.0  | APEX1    |
| 51107  | 1.5   | 1.0  | 1.0  | 1.0  | APH1A    |
| 378708 | 1.0   | 1.0  | 1.0  | 1.0  | APITD1   |
| 200558 | 1.0   | 1.0  | -7.4 | 1.0  | APLF     |
| 187    | 1.0   | 1.0  | -3.8 | 1.0  | APLNR    |
| 334    | 1.0   | 2.0  | 2.4  | 1.0  | APLP2    |
| 338    | 1.0   | -1.8 | -2.1 | -2.2 | APOB     |
| 9582   | 1.0   | 1.0  | 1.0  | 1.0  | APOBEC3B |
| 27350  | 1.0   | 1.0  | 1.0  | 1.0  | APOBEC3C |
| 200316 | 1.0   | 1.0  | -7.6 | -4.4 | APOBEC3F |
| 346    | 1.0   | 1.0  | 1.0  | 2.7  | APOC4    |
| 80831  | 1.0   | 1.0  | 1.0  | 1.0  | APOL5    |
| 80830  | 1.0   | 1.0  | 1.0  | 5.1  | APOL6    |
| 81575  | 1.0   | 1.0  | 1.0  | 1.0  | APOLD1   |
| 84334  | -2.7  | 5.3  | 1.0  | 1.0  | APOPT1   |
| 351    | 1.0   | 1.0  | 1.0  | 1.0  | APP      |
| 353    | 1.0   | -5.3 | -8.0 | -7.1 | APRT     |
| 54840  | 1.0   | 1.0  | 1.0  | 1.0  | APTX     |
| 358    | 1.0   | 1.0  | 1.0  | 1.0  | AQP1     |
| 359    | 1.6   | 1.0  | -2.6 | 1.0  | AQP2     |
| 363    | 3.9   | 1.0  | 1.0  | 1.0  | AQP6     |
| 364    | 1.0   | 2.4  | 1.0  | 1.0  | AQP7     |
| 9716   | 1.0   | 1.0  | 1.0  | 1.0  | AQR      |
| 369    | 1.0   | 1.0  | -3.0 | -2.9 | ARAF     |
| 116985 | 1.0   | 2.0  | 2.3  | 1.0  | ARAP1    |
| 23237  | 1.0   | 1.0  | 1.0  | 1.0  | ARC      |
| 372    | -2.1  | 1.0  | 1.0  | 2.7  | ARCN1    |
| 374    | 1.0   | 1.0  | 1.0  | 1.0  | AREG     |
| 377    | 1.0   | 1.0  | 1.0  | 1.0  | ARF3     |
| 378    | 1.0   | -3.1 | 1.0  | 1.0  | ARF4     |
| 381    | -1.5  | 1.0  | 1.0  | 1.0  | ARF5     |

|           |       |      |      |      |           |
|-----------|-------|------|------|------|-----------|
| 55738     | 2.0   | 1.0  | 1.0  | 1.0  | ARFGAP1   |
| 10564     | 1.0   | 1.0  | -3.0 | 1.0  | ARFGEF2   |
| 27236     | 1.0   | 3.8  | 3.8  | 1.0  | ARFIP1    |
| 10139     | 1.0   | 1.0  | 1.0  | 1.0  | ARFRP1    |
| 384       | 2.6   | 2.9  | 1.0  | 1.0  | ARG2      |
| 84986     | -3.5  | 1.0  | 5.4  | 1.0  | ARHGAP19  |
| 57569     | 1.0   | 2.5  | 1.0  | 1.0  | ARHGAP20  |
| 57584     | 1.7   | 1.0  | 1.0  | 1.0  | ARHGAP21  |
| 58504     | 1.0   | 1.0  | 1.0  | 1.0  | ARHGAP22  |
| 201176    | 2.9   | 1.0  | -4.5 | 1.0  | ARHGAP27  |
| 79822     | 1.0   | 1.0  | 4.9  | 1.0  | ARHGAP28  |
| 9411      | 1.0   | -6.7 | -6.5 | 1.0  | ARHGAP29  |
| 57514     | 1.0   | 1.0  | 1.0  | 1.0  | ARHGAP31  |
| 9743      | 1.0   | 1.0  | 1.0  | 1.0  | ARHGAP32  |
| 115703    | 1.0   | 1.0  | 1.0  | 1.0  | ARHGAP33  |
| 2909      | 1.0   | -3.6 | -6.3 | -5.1 | ARHGAP35  |
| 80728     | 1.0   | 1.0  | 1.0  | 1.0  | ARHGAP39  |
| 9912      | 1.0   | 1.0  | 3.9  | 1.0  | ARHGAP44  |
| 394       | 1.0   | 1.0  | 1.0  | 1.0  | ARHGAP5   |
| 64333     | 1.0   | 1.0  | 1.0  | 1.0  | ARHGAP9   |
| 397       | 1.0   | 2.1  | 1.0  | 1.0  | ARHGDIB   |
| 9639      | -18.5 | 1.0  | 2.9  | 1.0  | ARHGEF10  |
| 55160     | 1.0   | -5.1 | -6.2 | -5.5 | ARHGEF10L |
| 9828      | 1.0   | 6.1  | 1.0  | 5.1  | ARHGEF17  |
| 23370     | 1.0   | 1.0  | 1.0  | 1.0  | ARHGEF18  |
| 115557    | 4.3   | 1.0  | 1.0  | 1.0  | ARHGEF25  |
| 26084     | 1.0   | 1.0  | 1.0  | 3.3  | ARHGEF26  |
| 389337    | 1.0   | 1.0  | 1.6  | 1.0  | ARHGEF37  |
| 50649     | -5.1  | 5.5  | 1.0  | 1.0  | ARHGEF4   |
| 55701     | 1.0   | 1.0  | -8.3 | 1.0  | ARHGEF40  |
| 8874      | 2.7   | 1.0  | -3.1 | 1.0  | ARHGEF7   |
| 8289      | 2.0   | 2.6  | 2.8  | 2.9  | ARID1A    |
| 57492     | 1.7   | 1.0  | 1.0  | -3.9 | ARID1B    |
| 196528    | 1.0   | 1.0  | 1.0  | 1.0  | ARID2     |
| 5926      | 1.0   | 1.0  | -2.3 | 1.0  | ARID4A    |
| 10865     | 3.0   | -2.0 | 1.0  | 1.0  | ARID5A    |
| 84159     | 1.0   | 1.0  | 1.0  | 1.0  | ARID5B    |
| 285598    | 1.0   | -2.2 | -4.5 | 1.0  | ARL10     |
| 200894    | 3.1   | 1.0  | 2.3  | 1.0  | ARL13B    |
| 100506084 | 1.0   | 1.0  | 1.0  | 2.4  | ARL17B    |
| 403       | 13.3  | 1.0  | 1.0  | 1.0  | ARL3      |
| 10124     | 1.0   | 1.0  | -5.8 | 1.0  | ARL4A     |
| 10123     | 1.0   | 1.0  | 2.2  | 1.0  | ARL4C     |
| 84100     | 1.9   | 1.0  | 1.0  | -3.6 | ARL6      |
| 23204     | -2.1  | 1.0  | 1.0  | 1.0  | ARL6IP1   |
| 55207     | 1.0   | 1.0  | 1.0  | 1.0  | ARL8B     |
| 84071     | 1.0   | 1.0  | 1.0  | -3.3 | ARMC2     |
| 219681    | 1.0   | 1.0  | 1.0  | -2.5 | ARMC3     |



|           |       |      |      |      |             |
|-----------|-------|------|------|------|-------------|
| 93436     | 1.0   | 1.0  | 1.0  | -2.1 | ARMC6       |
| 100131755 | 1.0   | 1.0  | 1.0  | 1.0  | ARMCX4      |
| 9915      | 1.0   | 1.0  | 1.0  | 1.0  | ARNT2       |
| 56938     | 1.0   | 1.0  | 5.0  | 1.0  | ARNTL2      |
| 10095     | 1.0   | 1.0  | 1.0  | 1.0  | ARPC1B      |
| 100526693 | -1.8  | 1.0  | 1.0  | 1.0  | ARPC4-TTLL3 |
| 10092     | -1.8  | 1.0  | -7.0 | 1.0  | ARPC5       |
| 84517     | 1.0   | 1.0  | 1.0  | 1.0  | ARPM1       |
| 10777     | 1.0   | 7.7  | 1.0  | 1.0  | ARPP21      |
| 57561     | 1.0   | 4.3  | 1.0  | 1.0  | ARRDC3      |
| 91947     | 1.0   | 1.0  | 1.0  | 1.0  | ARRDC4      |
| 645432    | 1.0   | 5.6  | 4.9  | 1.0  | ARRDC5      |
| 411       | 1.0   | 1.0  | 1.0  | 1.0  | ARSB        |
| 414       | -2.6  | 1.0  | -4.9 | -4.9 | ARSD        |
| 340075    | 1.0   | 1.0  | 2.4  | 1.0  | ARSI        |
| 79642     | 1.0   | 1.0  | 1.0  | -3.1 | ARSJ        |
| 420       | 1.0   | 3.4  | 2.6  | 2.9  | ART4        |
| 116969    | 1.0   | 1.0  | 1.0  | 1.0  | ART5        |
| 64801     | -9.4  | -1.9 | -6.3 | -2.8 | ARV1        |
| 421       | 1.6   | 1.0  | 1.0  | -3.8 | ARVCF       |
| 442092    | 1.0   | 1.0  | 3.3  | 1.0  | ARVP6125    |
| 57412     | 1.0   | -2.9 | -3.1 | 1.0  | AS3MT       |
| 56624     | 1.0   | 1.0  | 3.1  | 1.0  | ASAH2       |
| 55616     | 1.0   | 1.0  | -1.5 | 1.0  | ASAP3       |
| 51665     | -1.8  | 1.0  | 1.0  | 1.0  | ASB1        |
| 136371    | 1.0   | 1.0  | 1.0  | 1.0  | ASB10       |
| 140456    | 1.0   | 1.0  | 1.0  | 1.0  | ASB11       |
| 92591     | 1.6   | 1.0  | 1.0  | 1.0  | ASB16       |
| 140461    | -11.7 | -3.4 | -4.1 | 1.0  | ASB8        |
| 84164     | 1.8   | 1.0  | 1.0  | 1.0  | ASCC2       |
| 10973     | 1.0   | 1.0  | 1.0  | -2.6 | ASCC3       |
| 430       | 1.0   | 1.0  | 1.0  | 1.0  | ASCL2       |
| 55723     | 52.5  | 1.0  | 1.0  | 1.0  | ASF1B       |
| 432       | 1.0   | 1.0  | 1.0  | 1.0  | ASGR1       |
| 55870     | 1.0   | 1.0  | 1.0  | 1.0  | ASH1L       |
| 54529     | 1.0   | 1.0  | 1.0  | 1.0  | ASNSD1      |
| 444       | 1.0   | -2.5 | -2.6 | 1.0  | ASPH        |
| 253982    | 1.0   | 1.0  | -4.4 | 1.0  | ASPHD1      |
| 57168     | 1.0   | 1.0  | 1.0  | 3.2  | ASPHD2      |
| 54829     | 1.0   | -4.2 | -4.6 | 1.0  | ASPN        |
| 151516    | 1.0   | 1.0  | 1.0  | 1.0  | ASPRV1      |
| 79058     | 1.0   | 1.0  | 1.7  | 1.0  | ASPSCR1     |
| 445       | 1.0   | 1.0  | -1.9 | 1.0  | ASS1        |
| 431705    | 4.1   | 1.0  | 1.0  | 1.0  | ASTL        |
| 23245     | 1.0   | 4.0  | 1.0  | 1.0  | ASTN2       |
| 55252     | -13.0 | 1.0  | 1.0  | 2.8  | ASXL2       |
| 80816     | 1.0   | 1.0  | 1.0  | 1.0  | ASXL3       |
| 54454     | 1.0   | 5.6  | 7.0  | 1.0  | ATAD2B      |

|        |      |      |      |      |            |
|--------|------|------|------|------|------------|
| 83858  | 1.0  | 1.0  | 2.8  | 2.9  | ATAD3B     |
| 219293 | 1.0  | 1.0  | 1.0  | 1.0  | ATAD3C     |
| 11101  | 1.0  | 1.0  | 1.0  | -2.1 | ATE1       |
| 466    | 1.0  | 1.0  | 1.0  | 1.0  | ATF1       |
| 1386   | 1.0  | 1.0  | 1.0  | 1.0  | ATF2       |
| 467    | 1.0  | 1.0  | 1.0  | 1.0  | ATF3       |
| 80063  | 1.0  | -1.8 | 1.0  | 1.0  | ATF7IP2    |
| 9140   | 1.0  | 1.0  | -5.0 | 1.0  | ATG12      |
| 9776   | 2.4  | 2.5  | 1.0  | 2.1  | ATG13      |
| 22863  | 1.0  | 1.0  | 1.0  | 1.0  | ATG14      |
| 55054  | 1.0  | 1.0  | 1.0  | 1.0  | ATG16L1    |
| 84938  | -3.5 | 1.0  | 1.0  | 1.0  | ATG4C      |
| 9474   | 16.1 | 4.3  | 3.7  | 3.3  | ATG5       |
| 51062  | 2.1  | 1.0  | 1.0  | 1.0  | ATL1       |
| 64225  | 1.0  | 3.2  | 1.0  | 5.5  | ATL2       |
| 472    | 1.0  | -2.9 | 2.3  | 1.0  | ATM        |
| 23300  | 1.0  | 1.0  | -5.6 | -3.4 | ATMIN      |
| 84913  | 1.0  | 3.3  | 1.0  | 4.2  | ATOH8      |
| 23120  | 1.0  | 1.0  | -5.6 | 1.0  | ATP10B     |
| 57205  | 1.0  | 1.0  | 1.0  | 1.0  | ATP10D     |
| 23200  | 1.0  | 1.0  | 4.9  | 1.0  | ATP11B     |
| 84239  | 1.0  | 1.0  | 1.0  | 1.0  | ATP13A4    |
| 84852  | 1.0  | 1.0  | 1.0  | 1.0  | ATP1A1OS   |
| 477    | 1.0  | 1.0  | 1.0  | 1.0  | ATP1A2     |
| 478    | -4.5 | 1.0  | 1.0  | 1.0  | ATP1A3     |
| 480    | 1.0  | 1.0  | 1.0  | 1.8  | ATP1A4     |
| 487    | 1.0  | 1.0  | -3.4 | 2.5  | ATP2A1     |
| 488    | 1.0  | 1.0  | -7.2 | 1.0  | ATP2A2     |
| 491    | 1.0  | -1.9 | -9.2 | -4.0 | ATP2B2     |
| 492    | -4.7 | -3.6 | 1.0  | 1.0  | ATP2B3     |
| 493    | 1.0  | -2.3 | 1.0  | 1.0  | ATP2B4     |
| 9914   | 1.0  | 1.0  | 1.0  | 1.0  | ATP2C2     |
| 495    | 1.0  | 1.0  | 1.0  | 3.4  | ATP4A      |
| 496    | 1.0  | 1.0  | 1.0  | 1.0  | ATP4B      |
| 521    | 3.0  | 1.0  | 1.0  | 1.0  | ATP5I      |
| 55101  | 3.3  | 4.2  | 1.0  | 4.2  | ATP5SL     |
| 9114   | 2.5  | 1.0  | 1.0  | 1.0  | ATP6V0D1   |
| 155066 | 1.0  | 1.0  | 1.0  | 1.0  | ATP6V0E2   |
| 525    | 1.0  | 1.0  | 1.0  | 1.0  | ATP6V1B1   |
| 538    | 1.0  | 1.0  | 1.0  | 1.0  | ATP7A      |
| 540    | 1.0  | 3.2  | 1.9  | 1.0  | ATP7B      |
| 5205   | 1.0  | 1.0  | 1.0  | 1.0  | ATP8B1     |
| 148229 | 1.0  | 1.0  | -7.1 | 1.0  | ATP8B3     |
| 158381 | 1.0  | 1.0  | 1.0  | -2.5 | ATP8B5P    |
| 374868 | 1.0  | 1.0  | 1.0  | 1.0  | ATP9B      |
| 64756  | 1.0  | 1.0  | 6.1  | 4.8  | ATPAF1     |
| 374973 | 1.0  | 1.0  | 1.0  | 1.0  | ATPAF1-AS1 |
| 91647  | 1.0  | 1.0  | -2.8 | 1.0  | ATPAF2     |

|        |      |      |      |      |          |
|--------|------|------|------|------|----------|
| 93974  | 1.0  | 4.5  | 3.7  | 1.0  | ATPIF1   |
| 84126  | 1.0  | 6.4  | 1.0  | 1.0  | ATRIP    |
| 26033  | 1.0  | 3.0  | 1.0  | 1.0  | ATRN1    |
| 546    | -4.1 | -4.1 | 1.0  | -4.0 | ATRX     |
| 6310   | 1.0  | 1.0  | 1.0  | 1.0  | ATXN1    |
| 6311   | 1.0  | -2.9 | 1.0  | 1.0  | ATXN2    |
| 11273  | 1.0  | 1.0  | -5.1 | 1.0  | ATXN2L   |
| 92552  | 1.0  | 1.0  | 1.0  | -2.2 | ATXN3L   |
| 6314   | 1.0  | 3.6  | 6.5  | 1.0  | ATXN7    |
| 127002 | 3.8  | 1.0  | 1.0  | 1.0  | ATXN7L2  |
| 550    | 1.0  | 1.0  | 1.0  | 1.0  | AUP1     |
| 6790   | 1.0  | 1.0  | 1.0  | 1.0  | AURKA    |
| 26053  | 1.0  | 1.0  | 1.0  | 1.0  | AUTS2    |
| 57099  | 1.0  | 1.0  | -2.4 | 1.0  | AVEN     |
| 23080  | 1.0  | -2.3 | -2.5 | 1.0  | AVL9     |
| 551    | 1.0  | 1.0  | 1.0  | 1.0  | AVP      |
| 158833 | 1.0  | 1.0  | 1.0  | 1.0  | AWAT1    |
| 8313   | 1.0  | 5.0  | 4.0  | 1.0  | AXIN2    |
| 563    | 1.0  | 1.0  | 1.0  | 1.0  | AZGP1    |
| 22994  | 1.0  | 1.0  | 1.0  | 1.0  | AZI1     |
| 64343  | 1.0  | 1.0  | -4.3 | 1.0  | AZI2     |
| 567    | 1.0  | 1.0  | 1.0  | 1.0  | B2M      |
| 8706   | 1.0  | 1.0  | 1.0  | 1.0  | B3GALNT1 |
| 8707   | 1.0  | 1.0  | -2.4 | 1.0  | B3GALT2  |
| 8705   | 1.0  | 1.0  | 1.0  | 1.0  | B3GALT4  |
| 126792 | 1.0  | -3.9 | -2.6 | -3.6 | B3GALT6  |
| 11041  | 1.0  | 1.0  | 1.0  | 1.0  | B3GNT1   |
| 10331  | 1.0  | 1.0  | 1.0  | 4.9  | B3GNT3   |
| 79369  | 1.0  | 1.0  | 5.3  | 3.5  | B3GNT4   |
| 192134 | 1.0  | 1.0  | 1.0  | 1.0  | B3GNT6   |
| 84752  | 1.0  | 6.5  | 6.0  | 5.6  | B3GNT9   |
| 2583   | 1.7  | 1.0  | 2.3  | 1.0  | B4GALNT1 |
| 338707 | 1.0  | 1.0  | -5.8 | 1.0  | B4GALNT4 |
| 8704   | 1.0  | 1.0  | 1.0  | 1.0  | B4GALT2  |
| 27077  | 2.1  | -4.8 | -5.4 | -2.5 | B9D1     |
| 80776  | 1.0  | 1.0  | -4.4 | 1.0  | B9D2     |
| 79870  | 1.0  | 1.0  | 1.0  | 1.0  | BAALC    |
| 29086  | 1.0  | 1.0  | 1.0  | 3.9  | BABAM1   |
| 23621  | 1.0  | 1.0  | 1.0  | 1.0  | BACE1    |
| 60468  | 1.0  | 1.9  | 1.0  | 1.0  | BACH2    |
| 572    | 1.0  | 2.4  | 1.0  | 1.0  | BAD      |
| 9530   | 2.3  | -3.6 | -3.9 | -6.3 | BAG4     |
| 574    | 1.9  | 1.0  | 4.1  | 1.0  | BAGE     |
| 85317  | 1.0  | 1.0  | 1.0  | 1.0  | BAGE4    |
| 575    | 1.6  | 1.0  | 1.0  | 4.2  | BAI1     |
| 576    | 2.3  | 1.0  | 1.0  | 1.0  | BAI2     |
| 10458  | 1.0  | 1.0  | 1.0  | 5.1  | BAIAP2   |
| 55971  | 1.0  | -3.5 | -5.0 | 1.0  | BAIAP2L1 |

|        |      |      |       |      |         |
|--------|------|------|-------|------|---------|
| 8815   | 1.0  | 2.5  | 1.0   | 1.0  | BANF1   |
| 54971  | 1.6  | -4.7 | 1.0   | -4.4 | BANP    |
| 56751  | 1.0  | 2.4  | 1.0   | 1.0  | BARHL1  |
| 343472 | 1.5  | 1.0  | -4.9  | 1.0  | BARHL2  |
| 8538   | 1.0  | 1.0  | 1.0   | 1.0  | BARX2   |
| 55509  | 1.0  | 1.8  | 1.0   | 1.0  | BATF3   |
| 581    | 1.0  | 1.0  | 1.0   | -2.9 | BAX     |
| 27113  | -1.6 | 1.0  | 1.0   | -3.2 | BBC3    |
| 92482  | 1.0  | 1.0  | 1.0   | 1.0  | BBIP1   |
| 582    | 1.0  | 1.0  | -2.3  | 1.0  | BBS1    |
| 585    | 1.5  | 1.0  | 1.0   | 1.0  | BBS4    |
| 129880 | 1.0  | 1.0  | -2.5  | -2.8 | BBS5    |
| 10134  | 1.0  | 1.0  | 1.0   | 1.0  | BCAP31  |
| 10286  | 1.0  | 1.0  | 1.0   | 1.0  | BCAS2   |
| 586    | -1.9 | 1.0  | 1.0   | 3.2  | BCAT1   |
| 587    | 1.0  | 1.0  | 1.0   | 1.0  | BCAT2   |
| 144233 | 1.0  | 1.0  | 3.5   | 1.0  | BCDIN3D |
| 590    | 1.0  | 1.0  | 1.0   | 1.0  | BCHE    |
| 594    | 1.0  | 1.0  | 1.0   | 1.0  | BCKDHB  |
| 53335  | 1.0  | 1.0  | 1.0   | 1.0  | BCL11A  |
| 64919  | 1.0  | 1.0  | -2.5  | -2.5 | BCL11B  |
| 596    | 1.0  | 1.0  | 1.0   | -2.5 | BCL2    |
| 83596  | 1.9  | 1.0  | 1.0   | 1.0  | BCL2L12 |
| 23786  | 1.0  | 1.0  | 3.6   | 3.3  | BCL2L13 |
| 79370  | 1.0  | -2.5 | -3.4  | 1.0  | BCL2L14 |
| 440603 | 1.0  | 2.4  | 3.2   | 1.0  | BCL2L15 |
| 9274   | 1.7  | 1.0  | 1.0   | 1.0  | BCL7C   |
| 283149 | 1.0  | 1.0  | 1.0   | 1.0  | BCL9L   |
| 9774   | 1.0  | 1.0  | 1.0   | 1.0  | BCLAF1  |
| 54880  | 2.2  | 1.0  | -11.7 | 1.0  | BCOR    |
| 613    | 1.7  | 1.0  | 1.0   | 1.0  | BCR     |
| 400892 | 1.0  | 1.0  | 1.0   | -2.6 | BCRP2   |
| 8678   | -2.6 | 1.0  | 1.0   | 1.0  | BECN1   |
| 57596  | 1.0  | 1.0  | 1.0   | 1.0  | BEGAIN  |
| 57673  | 1.0  | 1.0  | -2.4  | -2.4 | BEND3   |
| 222389 | 1.0  | 1.0  | 1.0   | 1.0  | BEND7   |
| 7439   | 1.5  | 1.0  | -2.0  | -1.5 | BEST1   |
| 144453 | 1.0  | 1.0  | 1.0   | 1.0  | BEST3   |
| 266675 | 1.7  | 2.3  | 1.0   | 2.2  | BEST4   |
| 10282  | -1.6 | -2.6 | -2.5  | 1.0  | BET1    |
| 51272  | 1.5  | 1.0  | -3.8  | 1.0  | BET1L   |
| 631    | 1.0  | 1.0  | 1.0   | 1.0  | BFSP1   |
| 8419   | 1.0  | 1.0  | 1.0   | 1.0  | BFSP2   |
| 632    | 3.2  | -2.9 | 1.0   | 1.0  | BGLAP   |
| 633    | 1.0  | 1.0  | 1.0   | 2.0  | BGN     |
| 8553   | 1.0  | 1.0  | 1.0   | 1.0  | BHLHE40 |
| 636    | 1.0  | 1.0  | 1.0   | 1.0  | BICD1   |
| 23299  | 1.0  | 1.9  | 1.0   | 1.0  | BICD2   |

|        |       |      |      |      |         |
|--------|-------|------|------|------|---------|
| 51411  | 1.0   | -5.1 | -7.4 | -3.4 | BIN2    |
| 329    | 1.0   | -5.4 | 1.0  | -5.0 | BIRC2   |
| 57448  | 1.0   | 1.0  | 1.0  | 1.0  | BIRC6   |
| 54841  | 6.9   | 1.0  | 9.9  | 1.0  | BIVM    |
| 641    | 1.0   | 1.0  | 1.0  | 1.0  | BLM     |
| 642    | 1.0   | 1.0  | 3.0  | 1.0  | BLMH    |
| 90427  | 1.0   | 1.0  | 2.6  | 1.0  | BMF     |
| 649    | 1.0   | 1.0  | 1.0  | 1.0  | BMP1    |
| 27302  | 1.0   | 1.0  | -1.7 | 1.0  | BMP10   |
| 650    | 1.0   | 1.0  | 1.0  | 1.0  | BMP2    |
| 653    | 1.0   | 1.0  | 1.0  | 1.0  | BMP5    |
| 655    | 1.0   | 1.0  | 1.0  | -6.4 | BMP7    |
| 353500 | 1.0   | 1.0  | 1.0  | 1.0  | BMP8A   |
| 168667 | 1.0   | 1.0  | 1.0  | 1.0  | BMPER   |
| 9790   | -2.5  | -3.9 | 1.0  | 1.0  | BMS1    |
| 54796  | 1.0   | -2.9 | 1.0  | 1.0  | BNC2    |
| 662    | 1.0   | 5.4  | 1.0  | 1.0  | BNIP1   |
| 665    | 1.0   | 2.5  | -1.7 | -4.0 | BNIP3L  |
| 91653  | 1.0   | 1.0  | 1.0  | 1.0  | BOC     |
| 284257 | 1.0   | 1.0  | 1.0  | 1.0  | BOD1P   |
| 388962 | 1.0   | 1.0  | 1.0  | 1.0  | BOLA3   |
| 23246  | 5.5   | 1.0  | 1.0  | 1.0  | BOP1    |
| 669    | 1.0   | 1.0  | 1.0  | 1.0  | BPGM    |
| 670    | 1.0   | 1.0  | 1.0  | 1.0  | BPHL    |
| 51297  | 1.0   | 1.0  | 1.0  | 4.6  | BPIFA1  |
| 317716 | 1.0   | 1.0  | 1.0  | 1.0  | BPIFA4P |
| 80341  | 1.0   | 6.4  | 1.0  | 1.0  | BPIFB2  |
| 10380  | 1.0   | 1.0  | -3.5 | -3.6 | BPNT1   |
| 673    | 1.0   | 1.0  | 1.0  | 1.0  | BRAF    |
| 23774  | 1.9   | 1.0  | 1.0  | -2.5 | BRD1    |
| 8019   | -3.4  | 1.0  | 4.7  | 1.0  | BRD3    |
| 29117  | 1.0   | 2.1  | 1.0  | 1.0  | BRD7    |
| 23629  | -16.3 | 1.0  | 1.0  | -5.9 | BRD7P3  |
| 10902  | 1.0   | 1.0  | 1.0  | 1.0  | BRD8    |
| 65980  | 1.0   | 2.1  | 1.0  | 1.0  | BRD9    |
| 9577   | -3.7  | 1.0  | 1.0  | 1.0  | BRE     |
| 2972   | 3.3   | 1.0  | 1.0  | 1.0  | BRF1    |
| 55290  | 1.0   | 1.0  | 1.0  | -4.7 | BRF2    |
| 140707 | 1.0   | 1.0  | 3.2  | 1.0  | BRI3BP  |
| 55845  | 1.0   | 1.0  | 1.0  | 1.0  | BRK1    |
| 148362 | -3.7  | -2.9 | -1.8 | 1.0  | BROX    |
| 51660  | 1.0   | 2.2  | 1.0  | 1.0  | BRP44L  |
| 680    | 1.0   | 1.0  | 1.0  | 1.0  | BRS3    |
| 84446  | 1.0   | 1.0  | 1.0  | 1.0  | BRSK1   |
| 9024   | 1.0   | 2.5  | 3.9  | 3.6  | BRSK2   |
| 54014  | 1.7   | 1.0  | 1.0  | 1.6  | BRWD1   |
| 682    | 1.0   | 1.0  | 1.0  | 1.0  | BSG     |
| 8927   | 1.0   | 1.9  | 1.0  | 1.0  | BSN     |

|        |      |      |       |      |          |
|--------|------|------|-------|------|----------|
| 7809   | 1.0  | 1.0  | 1.0   | 1.0  | BSND     |
| 684    | 1.0  | 1.0  | 4.9   | 3.7  | BST2     |
| 90135  | 1.0  | 1.0  | 1.0   | 1.0  | BTBD6    |
| 55727  | 1.0  | 1.0  | 1.0   | 1.0  | BTBD7    |
| 114781 | 1.0  | 4.4  | 1.0   | 1.0  | BTBD9    |
| 10950  | 1.0  | 5.7  | 6.1   | 1.0  | BTG3     |
| 54766  | 1.0  | 1.0  | 1.0   | 1.0  | BTG4     |
| 11118  | 1.0  | 1.0  | 1.0   | 1.0  | BTN3A2   |
| 79908  | 1.0  | 1.0  | 1.0   | 1.0  | BTNL8    |
| 8945   | 2.2  | 1.0  | 5.5   | 4.4  | BTRC     |
| 84811  | 1.0  | 2.6  | 2.8   | 2.5  | BUD13    |
| 705    | 1.0  | 1.0  | 1.0   | 1.0  | BYSL     |
| 770    | 1.0  | 3.3  | 1.0   | 1.0  | CA11     |
| 760    | 1.0  | 1.0  | 3.0   | 1.0  | CA2      |
| 762    | 1.0  | 1.0  | 1.0   | 1.0  | CA4      |
| 340591 | 1.0  | 1.0  | 1.0   | 1.0  | CA5BP1   |
| 765    | 9.4  | 6.2  | 1.0   | 6.4  | CA6      |
| 767    | 1.0  | 1.0  | 1.0   | 1.0  | CA8      |
| 23523  | 3.3  | 1.0  | 3.0   | 1.0  | CABIN1   |
| 57010  | 1.0  | 1.0  | 1.0   | 1.0  | CABP4    |
| 26256  | 1.0  | 1.0  | -6.5  | 1.0  | CABYR    |
| 57685  | 5.1  | 1.0  | 2.2   | 1.0  | CACHD1   |
| 774    | 1.0  | 3.5  | 4.4   | 1.0  | CACNA1B  |
| 775    | 1.0  | -7.9 | -14.2 | -9.3 | CACNA1C  |
| 777    | 1.8  | 1.0  | -3.1  | -3.2 | CACNA1E  |
| 778    | 1.0  | 1.8  | 1.0   | 1.0  | CACNA1F  |
| 781    | 1.0  | 1.0  | 1.0   | -2.5 | CACNA2D1 |
| 784    | 1.0  | 1.0  | 1.0   | 1.0  | CACNB3   |
| 786    | 1.0  | 1.0  | 1.0   | 1.0  | CACNG1   |
| 59285  | 1.0  | 2.2  | 1.0   | 1.0  | CACNG6   |
| 59283  | 1.0  | -7.7 | 1.0   | 1.0  | CACNG8   |
| 27101  | 1.0  | 1.0  | -7.8  | 1.0  | CACYBP   |
| 23705  | 1.0  | 1.0  | 1.0   | -3.6 | CADM1    |
| 57863  | -2.1 | 1.0  | 4.0   | 1.0  | CADM3    |
| 8618   | 1.0  | 1.0  | 1.0   | 1.0  | CADPS    |
| 285782 | 1.0  | -3.5 | -3.7  | 1.0  | CAGE1    |
| 796    | 1.0  | 2.0  | 1.0   | 1.0  | CALCA    |
| 10203  | 1.0  | 1.0  | -1.5  | -4.7 | CALCRL   |
| 255022 | 1.0  | 5.9  | 5.7   | 3.2  | CALHM1   |
| 808    | -1.6 | 1.0  | 1.0   | -3.5 | CALM3    |
| 91860  | 2.6  | 1.0  | 1.0   | 1.0  | CALML4   |
| 163688 | 1.0  | 1.0  | 1.0   | 1.0  | CALML6   |
| 811    | 1.0  | 1.0  | 1.0   | 1.0  | CALR     |
| 813    | 6.9  | 8.6  | 8.1   | 8.0  | CALU     |
| 8536   | 1.0  | 1.0  | 1.0   | 1.0  | CAMK1    |
| 57118  | 1.0  | 1.0  | 2.6   | 1.0  | CAMK1D   |
| 57172  | 1.0  | 1.0  | 1.0   | 2.3  | CAMK1G   |
| 815    | 1.0  | 1.0  | 1.0   | 5.2  | CAMK2A   |

|        |       |      |       |      |          |
|--------|-------|------|-------|------|----------|
| 818    | 1.0   | 1.0  | 1.0   | 1.0  | CAMK2G   |
| 79823  | 2.7   | 1.0  | -5.8  | 1.0  | CAMKMT   |
| 79012  | 1.0   | 1.0  | 1.6   | 1.0  | CAMKV    |
| 157922 | 1.0   | 1.0  | 5.6   | 1.0  | CAMSAP1  |
| 23271  | 2.2   | -4.9 | -4.8  | 1.0  | CAMSAP2  |
| 57662  | 1.0   | 1.0  | 1.0   | 1.0  | CAMSAP3  |
| 23261  | -2.3  | 1.0  | 1.0   | 4.4  | CAMTA1   |
| 55832  | 1.5   | 1.0  | 3.3   | 2.7  | CAND1    |
| 124583 | 2.2   | 1.0  | 2.2   | 1.0  | CANT1    |
| 821    | 1.0   | -2.5 | 1.0   | 1.0  | CANX     |
| 10487  | -1.6  | -2.8 | -2.8  | 1.0  | CAP1     |
| 822    | 3.9   | -3.3 | 1.0   | 1.0  | CAPG     |
| 11132  | -2.5  | 1.0  | -44.2 | 1.0  | CAPN10   |
| 147968 | -2.1  | 1.0  | 1.0   | 1.0  | CAPN12   |
| 824    | 1.0   | 1.0  | 2.3   | 1.0  | CAPN2    |
| 726    | -2.1  | -5.9 | -6.1  | -4.6 | CAPN5    |
| 10753  | 1.0   | 1.0  | 1.0   | 1.0  | CAPN9    |
| 826    | 1.0   | 1.0  | 1.0   | 1.0  | CAPNS1   |
| 84290  | 1.0   | 1.0  | 1.0   | 1.0  | CAPNS2   |
| 65981  | 1.0   | 1.0  | 1.0   | 1.0  | CAPRIN2  |
| 828    | 1.0   | 1.0  | 1.0   | 1.0  | CAPS     |
| 829    | -2.3  | 1.0  | 1.0   | 2.5  | CAPZA1   |
| 830    | 1.0   | 1.0  | 1.0   | 1.0  | CAPZA2   |
| 93661  | 4.0   | 1.0  | 1.0   | 1.0  | CAPZA3   |
| 29775  | 1.0   | 4.3  | 1.0   | 4.5  | CARD10   |
| 84433  | 1.0   | 1.0  | -3.0  | 1.0  | CARD11   |
| 114769 | 1.0   | 1.0  | 1.0   | 1.0  | CARD16   |
| 440068 | 1.0   | 1.0  | -3.4  | 1.0  | CARD17   |
| 64170  | 1.0   | 1.0  | 1.0   | 1.0  | CARD9    |
| 833    | -4.1  | 1.0  | 1.0   | -3.0 | CARS     |
| 255082 | 1.0   | 1.0  | 1.0   | 1.0  | CASC2    |
| 113201 | 1.0   | 1.0  | -1.8  | 1.0  | CASC4    |
| 57082  | 1.0   | 1.0  | 1.0   | 1.0  | CASC5    |
| 57524  | 1.0   | 1.0  | 1.0   | 1.0  | CASKIN1  |
| 834    | 1.0   | 1.0  | 1.0   | 1.0  | CASP1    |
| 841    | 1.0   | 1.0  | -7.0  | 1.0  | CASP8    |
| 846    | 1.0   | 1.0  | 1.0   | 1.0  | CASR     |
| 57091  | 1.0   | 1.0  | 1.0   | 1.0  | CASS4    |
| 54897  | 1.0   | 1.0  | -2.7  | -2.7 | CASZ1    |
| 847    | 1.0   | 1.0  | 1.0   | 1.0  | CAT      |
| 117155 | 1.0   | 1.0  | 1.0   | 1.0  | CATSPER2 |
| 378807 | -1.8  | 1.0  | 1.0   | 1.0  | CATSPER4 |
| 858    | 6.6   | 1.0  | 1.0   | 3.6  | CAV2     |
| 9139   | 1.0   | 2.2  | 1.0   | 1.0  | CBFA2T2  |
| 863    | 1.0   | 1.0  | 1.0   | 1.0  | CBFA2T3  |
| 867    | 1.0   | 1.0  | 1.0   | 1.0  | CBL      |
| 868    | -28.7 | 1.0  | 1.0   | 1.0  | CBLB     |
| 140689 | -26.2 | 1.0  | 1.0   | 2.4  | CBLN4    |

|        |      |      |      |      |          |
|--------|------|------|------|------|----------|
| 873    | 1.0  | 3.5  | 1.0  | 1.0  | CBR1     |
| 875    | 1.0  | 1.0  | 5.9  | 5.0  | CBS      |
| 220869 | 1.0  | 1.0  | -2.5 | -2.5 | CBWD5    |
| 10951  | 1.7  | 1.0  | -2.4 | -2.3 | CBX1     |
| 8535   | 1.9  | 1.0  | 1.0  | 3.9  | CBX4     |
| 23468  | 1.0  | 1.0  | 1.0  | 1.0  | CBX5     |
| 23466  | 5.7  | 1.0  | 1.0  | 1.0  | CBX6     |
| 25776  | 1.0  | 1.0  | 1.0  | 1.0  | CBY1     |
| 54862  | 7.0  | 1.0  | -5.9 | -2.8 | CC2D1A   |
| 200014 | 2.0  | 1.0  | 1.0  | 1.0  | CC2D1B   |
| 57545  | 1.0  | 1.0  | 1.0  | 1.0  | CC2D2A   |
| 387707 | 1.0  | 1.0  | 4.0  | 1.0  | CC2D2B   |
| 55749  | 1.0  | 1.0  | 1.0  | 1.0  | CCAR1    |
| 92922  | 54.0 | 1.0  | 1.0  | 1.0  | CCDC102A |
| 79839  | 1.0  | 2.9  | 1.0  | 1.0  | CCDC102B |
| 112942 | 1.0  | 1.0  | 1.0  | -3.8 | CCDC104  |
| 255101 | -2.1 | -4.4 | -3.7 | -3.9 | CCDC108  |
| 220136 | 1.0  | -3.1 | 1.0  | -5.7 | CCDC11   |
| 256309 | 1.0  | 1.0  | -3.2 | 1.0  | CCDC110  |
| 84317  | 5.2  | 1.0  | 6.1  | 1.0  | CCDC115  |
| 164592 | 1.0  | 1.0  | -3.1 | 1.0  | CCDC116  |
| 151903 | 1.0  | 1.0  | -1.6 | 1.0  | CCDC12   |
| 79635  | 1.0  | 1.0  | 1.0  | 1.0  | CCDC121  |
| 202243 | -5.5 | 1.0  | 1.0  | 1.0  | CCDC125  |
| 90693  | 1.0  | 1.0  | 1.0  | -2.4 | CCDC126  |
| 81576  | 1.0  | 4.3  | 3.9  | 3.7  | CCDC130  |
| 55610  | 1.0  | 1.0  | 1.0  | 1.0  | CCDC132  |
| 84229  | 1.0  | 1.0  | 1.0  | 1.0  | CCDC135  |
| 64770  | 1.0  | 1.0  | 1.0  | 1.0  | CCDC14   |
| 285025 | 1.0  | 1.0  | 1.0  | -3.1 | CCDC141  |
| 9720   | 1.0  | -6.4 | 1.0  | 1.0  | CCDC144A |
| 57639  | 1.0  | 1.0  | -2.7 | -3.1 | CCDC146  |
| 91050  | 2.6  | 1.0  | 1.0  | 1.0  | CCDC149  |
| 284992 | 1.0  | 1.0  | 1.0  | 1.0  | CCDC150  |
| 283152 | 1.0  | -4.1 | -5.2 | 1.0  | CCDC153  |
| 339965 | 1.0  | 1.0  | 1.0  | 1.0  | CCDC158  |
| 643677 | 1.0  | 1.0  | 1.0  | 1.0  | CCDC168  |
| 149483 | 1.0  | 1.0  | 3.0  | 1.0  | CCDC17   |
| 343099 | 1.0  | 1.0  | 6.3  | 5.1  | CCDC18   |
| 25790  | 1.7  | 1.0  | 1.0  | 1.0  | CCDC19   |
| 149473 | 1.0  | 1.0  | 1.0  | 1.0  | CCDC24   |
| 148870 | 1.0  | -2.2 | -1.7 | 1.0  | CCDC27   |
| 79140  | 1.0  | 1.0  | 1.0  | -3.9 | CCDC28B  |
| 83643  | 1.0  | 2.3  | 1.0  | 1.0  | CCDC3    |
| 728621 | 1.0  | 1.0  | 1.0  | -2.8 | CCDC30   |
| 51134  | -2.0 | -2.7 | -3.0 | 1.0  | CCDC41   |
| 79825  | 1.0  | -6.2 | 1.0  | 1.0  | CCDC48   |
| 152137 | -4.4 | 1.0  | 2.4  | 1.0  | CCDC50   |



|        |       |      |      |      |         |
|--------|-------|------|------|------|---------|
| 28958  | 1.0   | -2.5 | 1.0  | 1.0  | CCDC56  |
| 284001 | -14.9 | 1.0  | 4.6  | 4.2  | CCDC57  |
| 8030   | 1.0   | 3.6  | 3.7  | 1.0  | CCDC6   |
| 160777 | 1.0   | 1.0  | 3.4  | 1.0  | CCDC60  |
| 85478  | 1.0   | 1.0  | 1.0  | 1.0  | CCDC65  |
| 26112  | 3.8   | 1.0  | 2.4  | 1.0  | CCDC69  |
| 51372  | 1.0   | 1.0  | 5.2  | 1.0  | CCDC72  |
| 493860 | 1.0   | -2.0 | 1.0  | 1.0  | CCDC73  |
| 91409  | 1.0   | -5.0 | -5.6 | 1.0  | CCDC74B |
| 253635 | 1.0   | 1.0  | 1.0  | 1.0  | CCDC75  |
| 84318  | 1.0   | 5.2  | 1.0  | 5.0  | CCDC77  |
| 83987  | 1.0   | 3.1  | 1.0  | 1.0  | CCDC8   |
| 60494  | 1.0   | 31.0 | 1.0  | 1.0  | CCDC81  |
| 338657 | 1.0   | -3.7 | -7.5 | -4.8 | CCDC84  |
| 11007  | 1.0   | -2.9 | -2.6 | -2.6 | CCDC85B |
| 55231  | 1.0   | 3.1  | 3.5  | 1.0  | CCDC87  |
| 55704  | -1.6  | 1.0  | 1.0  | 1.0  | CCDC88A |
| 283234 | 3.6   | 1.0  | 4.9  | -2.7 | CCDC88B |
| 440193 | 1.9   | 1.0  | 24.4 | 1.0  | CCDC88C |
| 26093  | -1.6  | 1.0  | 2.5  | 1.0  | CCDC9   |
| 63933  | 1.0   | 1.0  | -2.5 | 1.0  | CCDC90A |
| 90324  | -2.1  | 1.0  | 1.0  | 1.0  | CCDC97  |
| 54908  | 1.0   | 1.0  | 1.0  | 1.0  | CCDC99  |
| 54535  | 1.0   | 1.0  | -2.0 | -2.0 | CCHCR1  |
| 885    | 1.0   | 1.0  | 1.0  | 1.0  | CCK     |
| 887    | 1.0   | 1.0  | 1.0  | -3.1 | CCKBR   |
| 6363   | 3.2   | 1.0  | 2.4  | 1.0  | CCL19   |
| 6347   | 1.0   | 1.8  | 1.0  | 1.0  | CCL2    |
| 6364   | 5.5   | 9.2  | 10.1 | 1.0  | CCL20   |
| 56477  | -2.3  | -3.3 | -4.6 | 1.0  | CCL28   |
| 6348   | 1.0   | 1.0  | 1.0  | 1.0  | CCL3    |
| 6351   | 4.3   | 1.0  | 4.8  | 1.0  | CCL4    |
| 6355   | 1.0   | 1.0  | -5.2 | 1.0  | CCL8    |
| 891    | 1.0   | -2.4 | -2.2 | -2.2 | CCNB1   |
| 9133   | 1.7   | 1.0  | 1.0  | 1.0  | CCNB2   |
| 85417  | 1.0   | 1.0  | 1.0  | 1.0  | CCNB3   |
| 595    | 1.0   | 2.8  | 1.0  | 1.0  | CCND1   |
| 894    | 1.0   | 1.0  | 1.0  | 1.0  | CCND2   |
| 898    | -4.3  | 1.0  | -2.3 | -2.3 | CCNE1   |
| 9134   | 1.0   | 4.7  | 4.5  | 3.2  | CCNE2   |
| 902    | 1.0   | 1.0  | -5.0 | 1.0  | CCNH    |
| 57018  | 1.0   | 1.0  | -3.5 | 1.0  | CCNL1   |
| 10309  | 1.0   | 1.0  | 1.0  | 1.0  | CCNO    |
| 904    | 1.0   | -3.6 | -4.6 | -3.5 | CCNT1   |
| 2826   | 1.0   | 1.0  | 1.0  | -5.3 | CCR10   |
| 1232   | 1.0   | 1.0  | 1.0  | 1.0  | CCR3    |
| 1234   | 1.0   | 1.0  | 1.0  | -2.2 | CCR5    |
| 25819  | 1.0   | 1.0  | 1.0  | 1.0  | CCRN4L  |

|        |      |      |      |      |         |
|--------|------|------|------|------|---------|
| 10575  | 2.3  | 1.0  | 1.0  | -2.7 | CCT4    |
| 908    | 1.0  | 1.0  | 1.0  | 1.0  | CCT6A   |
| 10693  | 1.0  | 1.0  | 1.0  | 1.0  | CCT6B   |
| 10574  | 4.6  | 1.0  | 1.0  | 1.0  | CCT7    |
| 10694  | 1.0  | 1.0  | 1.0  | -2.4 | CCT8    |
| 51622  | 1.0  | 1.0  | 1.0  | 1.0  | CCZ1    |
| 11126  | 1.0  | 1.0  | 1.0  | 1.0  | CD160   |
| 9332   | 1.0  | 1.0  | 1.0  | 2.0  | CD163   |
| 8763   | 1.0  | -5.5 | 1.0  | 1.0  | CD164   |
| 57126  | 5.8  | 1.0  | 1.0  | 1.0  | CD177   |
| 930    | 1.0  | 1.0  | 1.0  | 1.0  | CD19    |
| 910    | 1.0  | 1.0  | 1.0  | 1.0  | CD1B    |
| 912    | -6.2 | 1.0  | 1.0  | 1.0  | CD1D    |
| 913    | -5.7 | 1.0  | 4.7  | 1.0  | CD1E    |
| 914    | 1.0  | 1.0  | 1.0  | 1.0  | CD2     |
| 4345   | 1.0  | 1.0  | 1.0  | 1.0  | CD200   |
| 131450 | 1.0  | -4.5 | -7.1 | -5.6 | CD200R1 |
| 50489  | 1.0  | 3.2  | 1.0  | 1.0  | CD207   |
| 30835  | 1.0  | 1.0  | 1.0  | 1.0  | CD209   |
| 51744  | 1.0  | 1.0  | 1.0  | 1.0  | CD244   |
| 939    | 1.0  | 1.0  | -5.2 | -5.2 | CD27    |
| 29126  | 1.0  | 1.0  | 1.0  | 1.0  | CD274   |
| 940    | 5.5  | 1.0  | 1.0  | 1.0  | CD28    |
| 10421  | 15.1 | 1.0  | 1.0  | 1.0  | CD2BP2  |
| 11314  | 1.5  | 1.0  | 1.0  | 1.0  | CD300A  |
| 342510 | 1.0  | 5.5  | 3.7  | 5.4  | CD300E  |
| 124599 | 1.0  | 1.0  | 1.0  | 1.0  | CD300LB |
| 146894 | 1.0  | 1.0  | 3.2  | 1.0  | CD300LG |
| 51293  | 1.0  | 1.0  | 1.0  | 1.0  | CD320   |
| 945    | 1.0  | 1.0  | 1.0  | 1.0  | CD33    |
| 947    | 1.0  | 3.3  | 1.0  | 1.0  | CD34    |
| 948    | 1.0  | -2.3 | 1.0  | 1.0  | CD36    |
| 951    | 2.2  | -3.3 | 1.0  | 2.6  | CD37    |
| 959    | 1.0  | 1.0  | 3.1  | 1.0  | CD40LG  |
| 961    | 1.0  | 2.9  | 1.0  | 1.0  | CD47    |
| 921    | 1.0  | 1.0  | 1.0  | -5.3 | CD5     |
| 1604   | 1.0  | -1.7 | -6.6 | 1.0  | CD55    |
| 923    | -1.8 | 1.0  | 2.4  | 1.0  | CD6     |
| 971    | 1.0  | 1.0  | 1.0  | 1.0  | CD72    |
| 974    | 1.0  | 5.3  | 1.0  | 1.0  | CD79B   |
| 975    | 1.0  | 1.0  | 1.0  | 5.6  | CD81    |
| 8832   | 1.0  | 2.8  | 1.0  | 2.7  | CD84    |
| 942    | 1.0  | -2.7 | -3.3 | -2.9 | CD86    |
| 926    | 1.0  | 1.0  | 1.0  | 1.0  | CD8B    |
| 928    | 1.0  | 1.0  | 1.0  | 1.0  | CD9     |
| 10225  | 1.0  | 1.0  | -5.6 | 1.0  | CD96    |
| 976    | 1.0  | 1.0  | 1.0  | 1.0  | CD97    |
| 4267   | -6.1 | 1.0  | 1.0  | 1.0  | CD99    |

|        |       |      |      |      |          |
|--------|-------|------|------|------|----------|
| 83692  | 1.0   | 2.6  | 1.8  | 3.1  | CD99L2   |
| 81602  | -25.9 | -2.9 | -3.0 | 1.0  | CDADC1   |
| 8555   | 1.0   | 1.0  | -7.4 | -3.8 | CDC14B   |
| 8697   | 1.0   | 1.0  | 1.0  | 1.0  | CDC23    |
| 993    | 1.0   | 1.0  | 1.0  | 2.2  | CDC25A   |
| 994    | 1.0   | 1.0  | 1.0  | 1.0  | CDC25B   |
| 995    | 1.0   | 1.0  | 1.0  | -3.4 | CDC25C   |
| 11140  | 1.0   | 1.0  | 2.8  | 1.0  | CDC37    |
| 51362  | 2.4   | 1.0  | 1.0  | 1.0  | CDC40    |
| 8476   | 1.0   | 1.0  | 1.0  | 1.0  | CDC42BPA |
| 11135  | 1.8   | 1.0  | 1.0  | 1.0  | CDC42EP1 |
| 10435  | 1.0   | 1.0  | 1.0  | 5.7  | CDC42EP2 |
| 990    | 1.0   | 3.4  | 1.0  | 3.0  | CDC6     |
| 157313 | 1.0   | 1.0  | 1.0  | 1.0  | CDCA2    |
| 113130 | 1.0   | 1.0  | 2.2  | 2.3  | CDCA5    |
| 55143  | 1.0   | 1.0  | 1.0  | 1.0  | CDCA8    |
| 64866  | 1.0   | 1.0  | 2.0  | 1.0  | CDCP1    |
| 1010   | 2.7   | 1.0  | 7.1  | 1.0  | CDH12    |
| 1016   | 1.0   | 1.0  | 1.0  | 1.0  | CDH18    |
| 1000   | 1.0   | 1.0  | 1.0  | 1.0  | CDH2     |
| 64072  | 1.0   | 1.0  | 1.0  | 1.0  | CDH23    |
| 64403  | 1.0   | 1.0  | 1.0  | 3.3  | CDH24    |
| 1001   | 2.1   | 2.8  | 1.0  | 1.0  | CDH3     |
| 1002   | 1.0   | 1.0  | 1.0  | 1.0  | CDH4     |
| 1004   | -3.3  | 1.0  | 6.8  | 6.2  | CDH6     |
| 1005   | 1.0   | 1.0  | 1.0  | 1.0  | CDH7     |
| 92211  | 1.0   | 1.0  | 1.0  | 7.5  | CDHR1    |
| 222256 | 1.0   | 1.0  | 1.0  | 1.0  | CDHR3    |
| 8558   | 2.8   | -2.7 | 1.0  | 2.7  | CDK10    |
| 51755  | 1.0   | 1.0  | 1.0  | 1.0  | CDK12    |
| 8621   | 1.0   | 1.0  | 1.0  | 1.0  | CDK13    |
| 5127   | 1.0   | 1.0  | 1.0  | -5.6 | CDK16    |
| 5128   | 3.6   | 1.0  | 1.0  | 1.0  | CDK17    |
| 5129   | 1.0   | 5.1  | 1.0  | 1.0  | CDK18    |
| 8099   | 1.0   | 1.7  | 1.0  | 2.9  | CDK2AP1  |
| 10263  | 1.0   | 1.6  | 1.0  | 1.0  | CDK2AP2  |
| 1018   | 1.0   | 1.0  | 1.0  | 1.0  | CDK3     |
| 1019   | 3.1   | 1.0  | 3.7  | 2.4  | CDK4     |
| 51654  | 1.0   | 2.8  | 3.5  | 1.0  | CDK5RAP1 |
| 55755  | -5.6  | 1.0  | 1.0  | 1.0  | CDK5RAP2 |
| 1022   | 1.0   | 1.0  | 1.0  | -4.8 | CDK7     |
| 8814   | 1.0   | 1.0  | 1.0  | 1.0  | CDKL1    |
| 8999   | 1.0   | 1.0  | 1.0  | -3.4 | CDKL2    |
| 51265  | 2.5   | 2.6  | 2.7  | 2.5  | CDKL3    |
| 344387 | 1.0   | 1.0  | 1.0  | 1.0  | CDKL4    |
| 6792   | 1.0   | -3.6 | 1.0  | 1.0  | CDKL5    |
| 1026   | 1.0   | 1.0  | 1.0  | 1.0  | CDKN1A   |
| 1027   | 1.0   | 1.0  | 1.0  | 1.0  | CDKN1B   |

|           |       |      |      |      |           |
|-----------|-------|------|------|------|-----------|
| 1031      | 1.8   | 1.0  | 1.0  | 1.0  | CDKN2C    |
| 1033      | 1.0   | 1.0  | -2.6 | 1.0  | CDKN3     |
| 30850     | 1.0   | 1.0  | 1.0  | 1.0  | CDR2L     |
| 374286    | 1.0   | 1.0  | 1.0  | 1.0  | CDRT1     |
| 1040      | 1.0   | 1.0  | 1.0  | 1.0  | CDS1      |
| 8760      | 1.0   | 1.0  | 1.0  | 1.0  | CDS2      |
| 1041      | 1.0   | -1.6 | -4.1 | 1.0  | CDSN      |
| 81620     | 1.0   | 1.0  | 1.0  | 1.0  | CDT1      |
| 1044      | 1.0   | 1.0  | 1.0  | 1.0  | CDX1      |
| 1046      | 1.0   | -2.9 | -2.8 | -2.8 | CDX4      |
| 634       | 14.8  | 1.0  | 2.7  | 1.0  | CEACAM1   |
| 125931    | 1.0   | 1.0  | 1.0  | 1.0  | CEACAM20  |
| 1087      | 1.0   | 1.0  | 2.7  | 1.0  | CEACAM7   |
| 1088      | 1.0   | 1.0  | 1.0  | 1.0  | CEACAM8   |
| 1054      | 1.0   | 5.3  | 5.0  | 1.0  | CEBPG     |
| 27440     | 1.0   | 1.0  | 1.0  | 1.0  | CECR5     |
| 100130717 | 1.0   | 1.0  | 1.0  | 1.0  | CECR5-AS1 |
| 27439     | 1.0   | 1.0  | 1.0  | 3.6  | CECR6     |
| 1056      | 1.0   | -3.2 | -3.1 | -3.1 | CEL       |
| 1990      | 1.0   | 1.0  | -2.9 | -3.4 | CELA1     |
| 10659     | 1.0   | 1.0  | 2.4  | 1.0  | CELF2     |
| 9620      | 1.0   | 1.0  | 1.0  | 1.0  | CELSR1    |
| 51286     | 2.3   | 1.0  | 1.0  | 1.0  | CEND1     |
| 1059      | 1.0   | -3.5 | 1.0  | 1.0  | CENPB     |
| 92806     | 1.0   | 1.0  | 1.0  | 1.0  | CENPBD1   |
| 1062      | 1.0   | 2.4  | 1.0  | 1.0  | CENPE     |
| 1063      | 1.0   | 1.0  | 1.0  | 1.0  | CENPF     |
| 64946     | 1.0   | 1.0  | 1.0  | 1.0  | CENPH     |
| 2491      | -4.5  | 1.0  | -7.6 | 4.9  | CENPI     |
| 79172     | 1.0   | 1.8  | 1.0  | 1.0  | CENPO     |
| 401541    | -12.0 | 1.0  | 1.0  | 1.0  | CENPP     |
| 80152     | 1.0   | 1.0  | 1.0  | 1.0  | CENPT     |
| 9731      | 1.0   | 1.0  | 1.0  | 2.5  | CEP104    |
| 153241    | 1.0   | 1.0  | 5.7  | 1.0  | CEP120    |
| 145508    | 1.0   | 1.0  | 1.0  | 1.0  | CEP128    |
| 9662      | 1.0   | 1.0  | 1.0  | 5.6  | CEP135    |
| 22897     | 1.0   | 1.0  | 3.1  | 1.0  | CEP164    |
| 9859      | 1.0   | 1.0  | 1.0  | 1.0  | CEP170    |
| 84984     | 1.0   | 1.0  | 1.0  | 1.0  | CEP19     |
| 55125     | 1.0   | 1.0  | 5.8  | 4.7  | CEP192    |
| 11190     | 1.9   | 1.0  | 1.0  | 1.0  | CEP250    |
| 55165     | 12.2  | 1.0  | 1.0  | 1.0  | CEP55     |
| 9702      | 1.0   | 1.0  | 1.0  | 1.0  | CEP57     |
| 285753    | 1.0   | -2.9 | 1.0  | -2.6 | CEP57L1   |
| 80321     | 1.0   | 1.0  | 1.0  | 1.0  | CEP70     |
| 55722     | 1.0   | 4.5  | 3.3  | 1.0  | CEP72     |
| 79959     | 1.0   | 1.0  | 3.7  | 3.6  | CEP76     |
| 64793     | -2.4  | 1.0  | -3.7 | 1.0  | CEP85     |

|        |      |      |      |     |         |
|--------|------|------|------|-----|---------|
| 10390  | 1.0  | 1.0  | 1.0  | 1.0 | CEPT1   |
| 64781  | 1.0  | 1.0  | 3.1  | 1.0 | CERK    |
| 204219 | 28.9 | 1.0  | 1.0  | 1.0 | CERS3   |
| 1066   | -6.7 | 1.0  | 1.0  | 2.8 | CES1    |
| 51716  | 1.0  | -6.9 | 1.0  | 1.0 | CES1P1  |
| 55997  | 1.0  | 1.0  | 1.0  | 1.0 | CFC1    |
| 1675   | -1.6 | 2.2  | 1.6  | 1.0 | CFD     |
| 10428  | -4.0 | 1.0  | -5.4 | 1.0 | CFDP1   |
| 10878  | 1.0  | 1.0  | -2.2 | 1.0 | CFHR3   |
| 142913 | 3.0  | -5.2 | 1.0  | 1.0 | CFL1P1  |
| 8837   | 1.0  | 1.0  | 6.3  | 1.0 | CFLAR   |
| 5199   | 2.5  | 1.0  | 1.0  | 1.0 | CFP     |
| 79094  | 1.0  | 1.0  | 3.9  | 1.0 | CHAC1   |
| 494143 | 1.0  | 1.0  | 1.0  | 1.0 | CHAC2   |
| 1101   | -2.1 | 1.0  | 1.0  | 1.0 | CHAD    |
| 150356 | 1.0  | 1.7  | 1.0  | 1.0 | CHADL   |
| 283489 | 1.0  | 1.0  | 1.0  | 2.7 | CHAMP1  |
| 1103   | -2.1 | 1.0  | 1.0  | 1.0 | CHAT    |
| 84269  | 2.8  | -3.1 | 1.0  | 1.0 | CHCHD5  |
| 84303  | 1.0  | -6.9 | 1.0  | 1.0 | CHCHD6  |
| 79145  | 1.0  | 1.0  | 1.0  | 1.0 | CHCHD7  |
| 9557   | 1.0  | 1.0  | 4.2  | 1.0 | CHD1L   |
| 1106   | 4.8  | -3.3 | 5.2  | 6.3 | CHD2    |
| 84181  | 1.0  | 1.0  | 1.0  | 1.0 | CHD6    |
| 55636  | 1.0  | 1.0  | 1.0  | 1.0 | CHD7    |
| 57680  | 1.0  | 1.0  | 1.0  | 1.0 | CHD8    |
| 11200  | 1.0  | 1.0  | -3.9 | 1.0 | CHEK2   |
| 10523  | 1.0  | 1.0  | 1.0  | 1.0 | CHERP   |
| 1116   | 1.0  | -6.3 | 1.0  | 1.0 | CHI3L1  |
| 66005  | 2.2  | -2.5 | 1.0  | 1.0 | CHID1   |
| 5119   | 1.0  | 1.0  | 4.6  | 2.1 | CHMP1A  |
| 51652  | 1.0  | -3.7 | -4.0 | 1.0 | CHMP3   |
| 51510  | 1.0  | 4.6  | 1.0  | 1.0 | CHMP5   |
| 79643  | 1.0  | 1.0  | 1.0  | 1.0 | CHMP6   |
| 1124   | 1.0  | -7.1 | -7.5 | 1.0 | CHN2    |
| 26973  | 1.0  | 1.0  | 1.0  | 1.0 | CHORDC1 |
| 63928  | 1.0  | 1.0  | 2.5  | 1.0 | CHP2    |
| 54480  | -4.8 | 1.0  | 1.0  | 1.0 | CHPF2   |
| 56994  | 1.0  | 2.0  | 2.5  | 1.6 | CHPT1   |
| 8646   | 1.7  | 1.0  | 1.0  | 1.0 | CHRD    |
| 25884  | 1.0  | 1.0  | 2.6  | 1.6 | CHRD2   |
| 1129   | 1.0  | 1.0  | 1.0  | 1.0 | CHRM2   |
| 1131   | 1.6  | 1.0  | -3.2 | 1.0 | CHRM3   |
| 1133   | 1.0  | 1.0  | 2.7  | 2.4 | CHRM5   |
| 1135   | 1.0  | 2.7  | 1.0  | 1.0 | CHRNA2  |
| 1136   | 1.0  | -3.8 | -3.4 | 1.0 | CHRNA3  |
| 1138   | 1.0  | 1.0  | 1.0  | 2.9 | CHRNA5  |
| 55584  | 1.0  | 1.0  | 1.0  | 1.0 | CHRNA9  |

|        |      |      |      |      |         |
|--------|------|------|------|------|---------|
| 1142   | 1.0  | 3.3  | 3.1  | 3.2  | CHRN3   |
| 166012 | -2.5 | 1.0  | 1.0  | 1.0  | CHST13  |
| 113189 | 9.2  | 1.0  | 3.8  | 1.0  | CHST14  |
| 10164  | 1.0  | 1.0  | 1.0  | -6.2 | CHST4   |
| 26097  | 1.0  | 1.0  | 1.0  | 1.0  | CHTOP   |
| 10518  | 1.8  | 1.0  | 3.7  | 1.0  | CIB2    |
| 63924  | 1.0  | 1.0  | 1.0  | 1.7  | CIDEC   |
| 152302 | 1.0  | 1.0  | 1.0  | -4.1 | CIDEC   |
| 4261   | 1.0  | 1.0  | 1.0  | 1.0  | CIITA   |
| 1153   | 1.6  | 1.0  | 1.0  | 1.0  | CIRBP   |
| 55847  | 1.0  | -5.2 | -6.4 | -5.3 | CISD1   |
| 4435   | 1.0  | 1.0  | 1.0  | 1.0  | CITED1  |
| 25792  | 1.0  | -6.5 | 1.0  | 1.0  | CIZ1    |
| 150468 | 1.0  | 1.0  | 1.0  | 1.0  | CKAP2L  |
| 548596 | 1.0  | 1.0  | 1.0  | 1.0  | CKMT1A  |
| 1163   | 1.0  | 1.0  | 1.0  | 1.0  | CKS1B   |
| 1164   | 1.0  | 1.0  | 1.0  | 1.0  | CKS2    |
| 23332  | 6.8  | 1.0  | 1.0  | 1.0  | CLASP1  |
| 23122  | 1.0  | 1.0  | 1.0  | 1.0  | CLASP2  |
| 1178   | 1.0  | -2.1 | -2.6 | -2.2 | CLC     |
| 9629   | 1.0  | 1.0  | 1.0  | 1.0  | CLCA3P  |
| 22802  | 1.0  | 1.0  | 1.0  | 1.0  | CLCA4   |
| 23529  | 1.0  | 1.0  | 6.2  | 1.0  | CLCF1   |
| 1180   | 1.0  | 1.0  | 1.0  | 1.0  | CLCN1   |
| 1184   | 1.0  | 6.4  | 1.0  | 1.0  | CLCN5   |
| 1185   | 1.0  | 1.0  | 1.0  | 1.0  | CLCN6   |
| 1188   | 1.0  | 1.0  | 1.0  | 1.0  | CLCNKB  |
| 9071   | 1.0  | 1.0  | 1.0  | 1.0  | CLDN10  |
| 23562  | 1.0  | 1.0  | 1.0  | 3.4  | CLDN14  |
| 10686  | 1.0  | 5.4  | 6.1  | 1.0  | CLDN16  |
| 26285  | 1.0  | -3.4 | -3.1 | 1.0  | CLDN17  |
| 53842  | 1.0  | -4.3 | 1.0  | -7.5 | CLDN22  |
| 1364   | 1.0  | 1.0  | 1.0  | 1.0  | CLDN4   |
| 9080   | 1.7  | 1.0  | 3.4  | 1.0  | CLDN9   |
| 56650  | 1.0  | 3.3  | 1.0  | 3.8  | CLDND1  |
| 125875 | 1.0  | -3.5 | 1.0  | -3.6 | CLDND2  |
| 10462  | 2.0  | 1.0  | 1.0  | 1.0  | CLEC10A |
| 160364 | 1.0  | 1.0  | -8.1 | -5.8 | CLEC12A |
| 387837 | 1.0  | 1.0  | 1.0  | 2.9  | CLEC12B |
| 161198 | 1.0  | 1.0  | 1.0  | 1.0  | CLEC14A |
| 497190 | 1.0  | 1.0  | 1.0  | 4.1  | CLEC18B |
| 51267  | 1.0  | 1.0  | 1.0  | 2.8  | CLEC1A  |
| 9976   | 1.0  | 1.0  | 1.0  | 1.0  | CLEC2B  |
| 29121  | -3.4 | -4.5 | 1.0  | 1.0  | CLEC2D  |
| 7123   | 1.0  | 5.4  | 1.0  | 6.4  | CLEC3B  |
| 339390 | 1.0  | 1.0  | 1.0  | 1.0  | CLEC4G  |
| 10332  | 1.0  | -5.2 | 1.0  | 1.0  | CLEC4M  |
| 1192   | 1.6  | -2.5 | -2.5 | 1.0  | CLIC1   |

|        |       |       |      |      |          |
|--------|-------|-------|------|------|----------|
| 54102  | 1.0   | -3.9  | 1.0  | 1.0  | CLIC6    |
| 7461   | 1.0   | 1.0   | 1.0  | 1.0  | CLIP2    |
| 1195   | 1.0   | 1.0   | -4.5 | 1.0  | CLK1     |
| 1207   | 1.6   | 1.0   | 4.2  | 1.0  | CLNS1A   |
| 81037  | 1.0   | 1.0   | 1.6  | 1.0  | CLPTM1L  |
| 7401   | 1.0   | 1.0   | 1.0  | 1.0  | CLRN1    |
| 9746   | 1.0   | 1.0   | 1.0  | 1.0  | CLSTN3   |
| 23059  | 1.0   | 1.0   | -5.2 | 1.0  | CLUAP1   |
| 27098  | 1.0   | 1.0   | -5.2 | -5.5 | CLUL1    |
| 171425 | 1.0   | 1.0   | 1.0  | 4.1  | CLYBL    |
| 1215   | 1.0   | 1.0   | 1.0  | 1.0  | CMA1     |
| 8418   | 1.0   | 1.0   | 1.0  | -3.2 | CMAHP    |
| 55907  | -3.9  | 1.0   | 1.0  | 1.0  | CMAS     |
| 1240   | -4.5  | -2.9  | -2.9 | -2.5 | CMKLR1   |
| 113540 | 1.0   | 1.0   | -2.6 | 1.0  | CMTM1    |
| 123920 | 1.0   | -21.6 | 4.0  | 1.0  | CMTM3    |
| 116173 | 1.0   | 1.5   | 1.0  | 1.0  | CMTM5    |
| 168975 | 1.0   | 1.0   | 1.0  | 1.0  | CNBD1    |
| 7555   | 1.0   | 1.0   | 1.0  | 1.0  | CNBP     |
| 1261   | 1.0   | 1.0   | 1.0  | 1.0  | CNGA3    |
| 254263 | -1.9  | 1.0   | 1.0  | -4.8 | CNIH2    |
| 29097  | 1.0   | 1.0   | -5.9 | -5.4 | CNIH4    |
| 22866  | 1.0   | -3.2  | 1.0  | -5.6 | CNKSR2   |
| 54805  | 1.0   | 1.0   | -5.2 | -7.7 | CNNM2    |
| 23019  | 1.0   | 1.0   | 1.0  | 1.0  | CNOT1    |
| 4848   | 1.0   | 1.0   | 2.5  | 1.0  | CNOT2    |
| 4850   | 1.0   | 1.0   | 1.0  | 1.0  | CNOT4    |
| 246175 | 1.0   | 2.4   | 1.0  | 1.0  | CNOT6L   |
| 29883  | 5.2   | 1.0   | 1.0  | 4.7  | CNOT7    |
| 9337   | 1.0   | 1.0   | 1.0  | 1.0  | CNOT8    |
| 1267   | 1.0   | -5.7  | 1.0  | 1.0  | CNP      |
| 163882 | 1.0   | 1.0   | 1.0  | 1.0  | CNST     |
| 1271   | 1.0   | 1.0   | 1.0  | 1.0  | CNTFR    |
| 54875  | 1.0   | 1.0   | -6.6 | 1.0  | CNTLN    |
| 6900   | -3.2  | 6.0   | 4.6  | 4.3  | CNTN2    |
| 8506   | 3.8   | 1.0   | 1.0  | 1.0  | CNTNAP1  |
| 79937  | 1.0   | 1.0   | 1.0  | 1.0  | CNTNAP3  |
| 728577 | 1.0   | 1.0   | 1.0  | 2.1  | CNTNAP3B |
| 11064  | 1.0   | 1.0   | -5.1 | 1.0  | CNTRL    |
| 493753 | -24.2 | 1.0   | 1.0  | 1.0  | COA5     |
| 80347  | -6.3  | 1.0   | 1.0  | 1.0  | COASY    |
| 22837  | 4.1   | 8.1   | 6.3  | 1.0  | COBLL1   |
| 25920  | 1.0   | -3.0  | 1.0  | 1.0  | COBRA1   |
| 22796  | -9.8  | 1.0   | -3.6 | 1.0  | COG2     |
| 57511  | 1.0   | 1.0   | 1.0  | 1.0  | COG6     |
| 91949  | 1.0   | 1.0   | 1.0  | 1.0  | COG7     |
| 7373   | 1.0   | 1.0   | 1.0  | 1.0  | COL14A1  |
| 1307   | 1.0   | -2.5  | -2.6 | -2.8 | COL16A1  |

|        |       |      |      |      |          |
|--------|-------|------|------|------|----------|
| 1310   | 1.0   | 1.0  | 1.0  | 1.0  | COL19A1  |
| 1277   | 1.0   | 1.0  | 1.0  | 1.0  | COL1A1   |
| 1278   | 1.0   | 1.0  | 1.0  | 1.0  | COL1A2   |
| 57642  | -3.7  | 1.0  | 3.7  | 5.9  | COL20A1  |
| 169044 | 1.0   | -5.7 | -6.3 | 1.0  | COL22A1  |
| 85301  | -1.8  | 1.0  | 1.0  | 1.0  | COL27A1  |
| 10087  | 1.0   | 1.0  | 1.0  | 1.0  | COL4A3BP |
| 1286   | 1.0   | 1.0  | 1.0  | 1.0  | COL4A4   |
| 1287   | 1.0   | 1.0  | -3.7 | 1.0  | COL4A5   |
| 1288   | 1.6   | 1.0  | 1.0  | 1.0  | COL4A6   |
| 1289   | 1.0   | 1.0  | 1.0  | 2.9  | COL5A1   |
| 1290   | 1.0   | 1.0  | 1.0  | 1.0  | COL5A2   |
| 50509  | 1.0   | 4.7  | 4.8  | 1.0  | COL5A3   |
| 1294   | 1.0   | 1.0  | 1.0  | 1.0  | COL7A1   |
| 150684 | 1.0   | 1.0  | -2.4 | -2.4 | COMMD1   |
| 23412  | 1.0   | 1.0  | 1.0  | 1.0  | COMMD3   |
| 54939  | 1.0   | 1.0  | 1.0  | 1.0  | COMMD4   |
| 149951 | 1.0   | 1.0  | -3.8 | -3.8 | COMMD7   |
| 9276   | 1.0   | 1.0  | 3.2  | 1.0  | COPB2    |
| 8533   | 1.0   | 1.0  | 1.0  | 3.8  | COPS3    |
| 64708  | 1.0   | 1.0  | 1.0  | 1.0  | COPS7B   |
| 10920  | 1.0   | 1.0  | 1.0  | -2.5 | COPS8    |
| 80219  | 1.0   | 1.0  | 2.6  | 1.0  | COQ10B   |
| 27235  | 1.0   | 1.0  | 1.0  | 1.0  | COQ2     |
| 51805  | 5.7   | 1.0  | 6.8  | 7.5  | COQ3     |
| 51117  | 1.0   | 1.0  | 1.0  | 1.0  | COQ4     |
| 84274  | 1.0   | 2.7  | 2.3  | 1.0  | COQ5     |
| 10229  | -5.3  | 1.0  | 1.0  | 1.0  | COQ7     |
| 57017  | 2.0   | 1.0  | 1.0  | 1.0  | COQ9     |
| 57175  | -3.2  | 1.0  | 1.0  | -4.1 | CORO1B   |
| 7464   | 1.0   | 1.0  | 1.0  | 1.0  | CORO2A   |
| 10391  | 1.0   | 1.0  | 1.0  | 1.0  | CORO2B   |
| 23406  | 1.0   | 1.0  | 1.0  | 1.0  | COTL1    |
| 4512   | 1.8   | 1.0  | 1.0  | 2.1  | COX1     |
| 1352   | 1.0   | 1.0  | 1.0  | 1.0  | COX10    |
| 1355   | 1.0   | 1.0  | 1.0  | 1.0  | COX15    |
| 51241  | 1.0   | 1.0  | 1.0  | 1.0  | COX16    |
| 1327   | 1.0   | 1.0  | 1.0  | 1.0  | COX4I1   |
| 1347   | 1.0   | 1.0  | 1.0  | 1.0  | COX7A2   |
| 9167   | 1.0   | 1.0  | -4.7 | 1.0  | COX7A2L  |
| 1349   | 1.0   | 3.0  | 4.7  | 1.9  | COX7B    |
| 170712 | -10.9 | -5.1 | -3.8 | -3.7 | COX7B2   |
| 1350   | 13.3  | 1.0  | 10.8 | 1.0  | COX7C    |
| 1356   | 1.0   | 1.0  | 1.0  | -5.8 | CP       |
| 1359   | 1.0   | -2.5 | 1.0  | 1.0  | CPA3     |
| 93979  | 1.0   | 1.0  | 1.0  | 1.0  | CPA5     |
| 27151  | 1.0   | 1.0  | 1.0  | 1.0  | CPAMD8   |
| 1361   | 1.0   | 1.0  | -7.1 | 1.0  | CPB2     |



|        |      |      |       |      |            |
|--------|------|------|-------|------|------------|
| 1363   | 1.0  | 1.0  | 1.0   | 1.0  | CPE        |
| 80315  | 1.0  | 2.6  | 1.0   | 1.0  | CPEB4      |
| 10814  | 1.0  | 4.4  | 1.0   | 1.0  | CPLX2      |
| 1370   | 1.0  | 1.0  | 1.0   | 3.3  | CPN2       |
| 57699  | 1.0  | 1.0  | 1.0   | 1.0  | CPNE5      |
| 144402 | 1.0  | -7.6 | -6.4  | 1.0  | CPNE8      |
| 55313  | 1.0  | 1.0  | 1.0   | 1.0  | CPPED1     |
| 53981  | 1.0  | 1.0  | 1.0   | 1.0  | CPSF2      |
| 10898  | 1.0  | 3.8  | 1.8   | 2.9  | CPSF4      |
| 1376   | 1.0  | 1.0  | -2.1  | 1.0  | CPT2       |
| 119587 | 1.0  | 1.0  | 1.0   | 1.5  | CPXM2      |
| 1379   | 1.0  | 25.1 | 1.0   | 1.0  | CR1L       |
| 8738   | 1.0  | 2.2  | 1.0   | 1.0  | CRADD      |
| 23418  | 1.0  | 1.0  | -2.8  | 1.0  | CRB1       |
| 286204 | 1.0  | 2.6  | 1.0   | 1.0  | CRB2       |
| 51185  | -3.6 | 1.0  | 1.0   | 1.0  | CRBN       |
| 90993  | -1.9 | 1.0  | 1.0   | 1.0  | CREB3L1    |
| 64764  | 1.0  | 1.0  | 1.0   | 1.0  | CREB3L2    |
| 84699  | 1.7  | 1.0  | 1.6   | 1.8  | CREB3L3    |
| 9586   | 1.0  | 1.0  | 2.5   | 1.0  | CREB5      |
| 1387   | 1.0  | 3.0  | 1.0   | 1.0  | CREBBP     |
| 1392   | 1.0  | 1.0  | 1.0   | 1.0  | CRH        |
| 1394   | 1.9  | 1.0  | 1.0   | 1.0  | CRHR1      |
| 1396   | 1.0  | 3.0  | 4.2   | 5.1  | CRIP1      |
| 1397   | 1.0  | 1.0  | 1.0   | 1.0  | CRIP2      |
| 9419   | 1.0  | -4.0 | -5.7  | 1.0  | CRIPT      |
| 7180   | 2.7  | 1.0  | 1.0   | 1.0  | CRISP2     |
| 51340  | 1.0  | 1.0  | 1.0   | 1.0  | CRNKL1     |
| 9696   | 1.0  | 1.0  | 1.0   | 1.0  | CROCC      |
| 84809  | 1.0  | -7.7 | 1.0   | 1.0  | CROCCP2    |
| 54677  | 1.0  | 1.0  | -5.8  | 1.0  | CROT       |
| 1401   | 1.0  | 1.0  | 2.6   | 1.0  | CRP        |
| 10491  | -9.3 | 1.0  | 1.0   | 1.0  | CRTAP      |
| 23373  | 1.0  | 1.0  | 1.0   | 1.0  | CRTC1      |
| 1406   | 1.0  | 1.0  | 1.0   | 1.0  | CRX        |
| 1409   | 1.0  | 1.0  | 1.0   | 1.0  | CRYAA      |
| 1413   | 1.0  | 1.0  | 1.0   | 1.0  | CRYBA4     |
| 1415   | 1.0  | -2.7 | 1.0   | 1.0  | CRYBB2     |
| 155051 | 1.0  | 1.0  | 1.0   | 1.0  | CRYGN      |
| 9946   | 1.0  | -7.7 | -10.3 | -8.6 | CRYZL1     |
| 158511 | 1.0  | 1.0  | 1.0   | -3.1 | CSAG1      |
| 8531   | 1.0  | 1.0  | 1.0   | -1.6 | CSDA       |
| 7812   | -1.7 | -2.4 | 1.0   | 1.0  | CSDE1      |
| 1434   | -2.9 | 1.0  | 1.0   | 2.4  | CSE1L      |
| 1436   | 1.0  | 1.0  | -2.6  | -2.4 | CSF1R      |
| 55790  | 1.0  | 1.0  | 1.0   | 1.0  | CSGALNACT1 |
| 55454  | 1.0  | 1.0  | 1.9   | 1.0  | CSGALNACT2 |
| 64478  | 1.0  | 1.0  | 1.0   | 1.0  | CSMD1      |

|           |       |      |       |       |           |
|-----------|-------|------|-------|-------|-----------|
| 114784    | 1.0   | 1.0  | 1.0   | 1.0   | CSMD2     |
| 1447      | 1.0   | 1.0  | 1.0   | 1.0   | CSN2      |
| 1448      | 1.0   | -2.7 | -11.2 | -2.2  | CSN3      |
| 122011    | 1.0   | 4.1  | 1.0   | 1.0   | CSNK1A1L  |
| 1455      | 6.1   | 1.0  | 1.0   | 1.0   | CSNK1G2   |
| 1457      | 1.0   | 1.0  | 5.4   | 1.0   | CSNK2A1   |
| 64651     | 1.8   | 1.0  | 1.0   | 1.0   | CSRNP1    |
| 1469      | 1.0   | 1.0  | 1.6   | 1.0   | CST1      |
| 1470      | 1.0   | 1.0  | 1.0   | 6.7   | CST2      |
| 1471      | 3.0   | 1.0  | 1.0   | -2.5  | CST3      |
| 1476      | -5.6  | 1.0  | 1.0   | -3.4  | CSTB      |
| 1479      | 1.0   | 4.7  | 1.0   | 1.0   | CSTF3     |
| 128817    | 1.0   | 1.0  | -3.1  | 1.0   | CSTL1     |
| 164380    | 1.0   | 1.0  | -6.8  | 1.0   | CSTT      |
| 541466    | 1.0   | 1.0  | 1.0   | 1.0   | CT45A1    |
| 64693     | 1.0   | 1.0  | 2.6   | 2.7   | CTAGE1    |
| 441294    | 1.0   | 1.0  | 1.0   | 1.0   | CTAGE15P  |
| 100128553 | 1.0   | 1.0  | 1.0   | 1.0   | CTAGE4    |
| 4253      | 1.0   | 1.0  | -7.1  | 1.0   | CTAGE5    |
| 1488      | 2.8   | 1.0  | 1.0   | -3.0  | CTBP2     |
| 10664     | 13.6  | 1.0  | 3.1   | 1.0   | CTCF      |
| 9150      | 1.0   | 1.0  | 1.0   | 1.0   | CTDP1     |
| 58190     | -5.1  | 1.0  | -6.7  | 1.0   | CTDSP1    |
| 10106     | 1.0   | 1.0  | 1.0   | -19.6 | CTDSP2    |
| 51496     | 1.0   | 1.0  | 1.0   | -3.0  | CTDSPL2   |
| 1489      | 1.0   | 1.0  | 1.0   | 1.0   | CTF1      |
| 8727      | 1.0   | 1.0  | 1.0   | 1.0   | CTNNAL1   |
| 1499      | 1.5   | 1.0  | 1.0   | 1.0   | CTNNB1    |
| 1497      | 1.0   | 1.0  | 1.0   | 1.0   | CTNS      |
| 56474     | -2.0  | 1.0  | -3.5  | -3.5  | CTPS2     |
| 1075      | 4.8   | 1.0  | -2.8  | -2.8  | CTSC      |
| 1509      | 2.0   | 1.0  | 1.0   | 1.8   | CTSD      |
| 1510      | 1.0   | 1.0  | 1.0   | 1.0   | CTSE      |
| 8722      | 1.0   | 1.0  | 1.0   | 4.4   | CTSF      |
| 1512      | 1.5   | 1.0  | 1.0   | 1.0   | CTSH      |
| 1514      | 1.0   | 1.0  | 1.0   | 1.0   | CTSL1     |
| 55917     | 1.0   | 1.0  | 1.0   | 1.0   | CTTNBP2NL |
| 8029      | 1.0   | 1.0  | 1.0   | 1.0   | CUBN      |
| 8454      | 1.0   | 1.0  | -3.0  | 1.0   | CUL1      |
| 8451      | 1.0   | 2.9  | 3.4   | 1.0   | CUL4A     |
| 8065      | 1.0   | 3.7  | 1.0   | 1.0   | CUL5      |
| 9820      | 1.0   | 3.3  | 1.0   | 1.0   | CUL7      |
| 1523      | -13.9 | 1.0  | 1.0   | 1.0   | CUX1      |
| 54883     | 1.0   | 1.0  | 1.0   | 1.0   | CWC25     |
| 55280     | 2.1   | 1.0  | 1.0   | 1.0   | CWF19L1   |
| 1525      | -9.4  | 1.0  | 1.0   | 1.0   | CXADR     |
| 6387      | 1.0   | 2.0  | 1.0   | 1.0   | CXCL12    |
| 10563     | 1.0   | -2.9 | -2.3  | -2.6  | CXCL13    |

|           |       |      |      |      |          |
|-----------|-------|------|------|------|----------|
| 58191     | 1.0   | 1.0  | 1.0  | 1.0  | CXCL16   |
| 284340    | 1.0   | 1.0  | 1.0  | 1.0  | CXCL17   |
| 4283      | 1.0   | -3.4 | 1.0  | 1.0  | CXCL9    |
| 3577      | -2.0  | 1.0  | 1.0  | -3.4 | CXCR1    |
| 3580      | 1.0   | 1.0  | 1.0  | 1.0  | CXCR2P1  |
| 2833      | 1.0   | -2.5 | -2.4 | 1.0  | CXCR3    |
| 9142      | 1.0   | 1.0  | 1.0  | 1.0  | CXorf1   |
| 170063    | 1.0   | 1.0  | 1.0  | -3.0 | CXorf22  |
| 256643    | 1.0   | 1.0  | 1.0  | 1.0  | CXorf23  |
| 79742     | 1.0   | 1.0  | 1.0  | 1.0  | CXorf36  |
| 159013    | 1.0   | 1.0  | 2.5  | 1.0  | CXorf38  |
| 541578    | 1.0   | 1.0  | 1.0  | 1.0  | CXorf40B |
| 100129239 | 1.0   | 1.0  | -5.6 | 1.0  | CXorf51A |
| 63932     | 1.0   | -4.5 | 3.2  | 1.0  | CXorf56  |
| 158830    | 1.0   | 1.0  | 1.0  | 1.0  | CXorf65  |
| 1528      | 5.1   | 1.0  | 1.0  | 1.0  | CYB5A    |
| 124637    | 1.0   | 1.0  | 1.0  | 1.0  | CYB5D1   |
| 51700     | 1.0   | 1.0  | 3.1  | 1.0  | CYB5R2   |
| 1727      | 1.0   | 5.4  | 1.0  | 3.1  | CYB5R3   |
| 51167     | 1.0   | -2.5 | 1.0  | 1.0  | CYB5R4   |
| 54205     | -7.3  | 1.0  | 1.0  | -7.0 | CYCS     |
| 26999     | 1.0   | 1.0  | 1.0  | 1.0  | CYFIP2   |
| 50626     | 1.7   | 1.0  | 1.0  | 1.0  | CYHR1    |
| 1584      | 2.1   | 4.4  | 1.0  | 1.0  | CYP11B1  |
| 1588      | 1.0   | 1.0  | 1.0  | -6.2 | CYP19A1  |
| 1543      | 1.0   | 2.7  | 2.6  | 1.0  | CYP1A1   |
| 56603     | 1.0   | 1.0  | 1.0  | 1.0  | CYP26B1  |
| 1593      | 1.0   | 1.0  | 1.0  | 1.0  | CYP27A1  |
| 1594      | 1.0   | 1.0  | -3.9 | 1.0  | CYP27B1  |
| 1553      | 1.0   | 1.0  | 1.0  | -2.5 | CYP2A13  |
| 1549      | -7.0  | 1.0  | 1.0  | 1.0  | CYP2A7   |
| 1562      | 1.0   | 1.0  | 1.0  | 1.0  | CYP2C18  |
| 1565      | 1.0   | 1.0  | 1.0  | 1.0  | CYP2D6   |
| 1572      | 1.8   | 1.0  | 1.0  | 3.9  | CYP2F1   |
| 1573      | -21.4 | 1.0  | 3.2  | 1.0  | CYP2J2   |
| 120227    | 1.0   | 1.0  | 1.0  | 1.0  | CYP2R1   |
| 54905     | 1.0   | 1.0  | 1.0  | 1.0  | CYP2W1   |
| 1576      | 1.0   | 1.0  | 1.0  | 1.0  | CYP3A4   |
| 64816     | -2.0  | 1.0  | 1.0  | -5.7 | CYP3A43  |
| 1577      | -2.1  | 1.0  | 1.0  | -3.0 | CYP3A5   |
| 10858     | 1.0   | 1.0  | 1.0  | 1.0  | CYP46A1  |
| 1579      | 2.2   | 1.0  | 3.0  | 1.0  | CYP4A11  |
| 57834     | 1.0   | 1.0  | 1.0  | 1.0  | CYP4F11  |
| 8529      | 1.0   | 1.0  | 1.0  | 1.0  | CYP4F2   |
| 1581      | 1.0   | 1.0  | 2.6  | 1.0  | CYP7A1   |
| 9420      | 1.0   | 1.0  | 1.0  | -3.8 | CYP7B1   |
| 9267      | 1.0   | 1.0  | 1.0  | 1.0  | CYTH1    |
| 9595      | 1.0   | 1.0  | 1.0  | 1.0  | CYTIP    |

|           |      |      |      |      |          |
|-----------|------|------|------|------|----------|
| 116159    | 1.0  | 1.0  | -6.7 | -6.4 | CYYR1    |
| 153090    | 1.0  | 3.3  | 3.4  | 3.1  | DAB2IP   |
| 1602      | 1.0  | -3.8 | 1.0  | 1.0  | DACH1    |
| 168002    | -7.8 | 1.0  | -7.6 | 1.0  | DACT2    |
| 147906    | -3.4 | 1.0  | 1.0  | 1.0  | DACT3    |
| 1605      | 1.0  | 1.0  | -2.7 | 1.0  | DAG1     |
| 26007     | 1.0  | 1.0  | 1.0  | 1.0  | DAK      |
| 55152     | 1.0  | 1.0  | -3.5 | -3.5 | DALRD3   |
| 1611      | 2.8  | 1.0  | 2.7  | 6.8  | DAP      |
| 1612      | 1.0  | 1.0  | 1.0  | 1.0  | DAPK1    |
| 92196     | 1.0  | 1.0  | 1.0  | 1.0  | DAPL1    |
| 27071     | 1.0  | 1.0  | 1.0  | 1.0  | DAPP1    |
| 1615      | -1.6 | 1.0  | 1.0  | 4.7  | DARS     |
| 1616      | 1.0  | 1.0  | 1.0  | 2.9  | DAXX     |
| 26528     | 1.0  | 1.0  | 1.0  | 1.0  | DAZAP1   |
| 1622      | 1.0  | 1.0  | -2.7 | 1.0  | DBI      |
| 100131454 | 1.0  | -3.7 | -4.1 | -2.1 | DBIL5P   |
| 100169989 | 1.0  | 1.0  | 1.0  | -3.5 | DBIL5P2  |
| 28988     | 1.0  | -5.6 | -3.8 | 1.0  | DBNL     |
| 1628      | 1.0  | -3.8 | 1.0  | -3.4 | DBP      |
| 51163     | 1.0  | 1.0  | 1.0  | 1.0  | DBR1     |
| 79269     | 90.5 | 1.0  | 81.4 | 1.0  | DCAF10   |
| 25853     | 1.0  | 1.0  | 1.0  | 1.0  | DCAF12   |
| 139170    | 1.0  | -3.6 | 1.0  | 1.0  | DCAF12L1 |
| 25879     | 1.0  | -3.4 | 1.0  | -3.5 | DCAF13   |
| 54876     | 1.0  | 1.0  | 1.0  | 1.0  | DCAF16   |
| 80067     | 1.0  | 1.9  | 1.0  | 1.0  | DCAF17   |
| 138009    | 1.0  | -3.4 | 1.0  | -5.5 | DCAF4L2  |
| 10238     | 1.6  | 3.6  | 1.0  | 1.0  | DCAF7    |
| 50717     | 1.0  | 1.0  | 1.0  | 1.0  | DCAF8    |
| 285761    | 1.0  | 1.0  | 1.0  | -2.3 | DCBLD1   |
| 54798     | -1.8 | 1.0  | -5.5 | 1.0  | DCHS2    |
| 64421     | 1.0  | 1.0  | 3.6  | 1.0  | DCLRE1C  |
| 55802     | 1.0  | 1.0  | 1.0  | 1.0  | DCP1A    |
| 84516     | 1.0  | 1.0  | 1.0  | 5.7  | DCTN5    |
| 55208     | 1.0  | -7.2 | -5.6 | 1.0  | DCUN1D2  |
| 79016     | 6.0  | 1.0  | 1.0  | 1.0  | DDA1     |
| 23564     | 1.0  | 1.0  | 1.0  | 1.0  | DDAH2    |
| 1642      | 1.0  | 1.0  | 5.7  | 1.0  | DDB1     |
| 1643      | -2.5 | -4.4 | -4.2 | 1.0  | DDB2     |
| 23259     | 4.5  | 1.0  | 1.0  | 1.0  | DDHD2    |
| 84301     | 1.0  | 1.0  | 1.0  | 1.0  | DDI2     |
| 54541     | 1.0  | 1.0  | 2.0  | 1.0  | DDIT4    |
| 115265    | 1.0  | 1.0  | 1.0  | 1.0  | DDIT4L   |
| 8528      | 1.0  | 1.0  | 1.0  | 1.0  | DDO      |
| 4921      | 1.0  | 1.0  | 1.0  | 1.0  | DDR2     |
| 1662      | 1.0  | 1.0  | 5.7  | 1.0  | DDX10    |
| 10521     | 1.0  | 1.0  | 1.0  | 1.0  | DDX17    |

|        |       |      |      |      |          |
|--------|-------|------|------|------|----------|
| 8886   | 1.0   | 1.0  | 1.0  | 1.0  | DDX18    |
| 55308  | 1.0   | 1.0  | -3.4 | 1.0  | DDX19A   |
| 11218  | 1.0   | 1.0  | 3.3  | 2.4  | DDX20    |
| 57062  | 1.0   | 1.0  | 1.0  | 1.0  | DDX24    |
| 29118  | 1.0   | 1.0  | 1.0  | 1.0  | DDX25    |
| 203522 | 1.0   | 1.0  | 1.0  | 1.0  | DDX26B   |
| 55661  | 1.0   | 1.0  | 1.7  | 1.0  | DDX27    |
| 7919   | 1.0   | 1.0  | 1.0  | -3.3 | DDX39B   |
| 8653   | 1.0   | 1.0  | 1.0  | 1.0  | DDX3Y    |
| 51202  | -2.0  | 1.0  | 1.0  | 1.0  | DDX47    |
| 1655   | 1.0   | 1.0  | 1.0  | 1.0  | DDX5     |
| 1656   | -2.9  | 3.7  | 3.2  | 2.2  | DDX6     |
| 10522  | 1.0   | -2.6 | 1.0  | 1.0  | DEAF1    |
| 26063  | 1.0   | 1.0  | 1.0  | 1.0  | DECR2    |
| 9191   | 3.5   | 1.0  | 1.0  | 1.0  | DEDD     |
| 50619  | 1.0   | 1.0  | 1.0  | 1.0  | DEF6     |
| 1669   | 1.0   | 1.0  | 1.0  | 4.4  | DEFA4    |
| 1670   | 1.0   | 1.0  | 5.0  | 1.0  | DEFA5    |
| 503618 | 1.0   | 1.0  | 1.0  | 1.0  | DEFB104B |
| 504180 | 1.0   | 1.0  | 2.8  | 1.0  | DEFB105B |
| 503841 | 1.0   | 1.0  | -3.3 | 1.0  | DEFB106B |
| 245928 | 1.0   | 1.0  | -3.6 | 1.0  | DEFB114  |
| 245936 | 1.8   | 1.0  | 1.7  | 1.0  | DEFB123  |
| 140881 | 8.4   | 9.1  | 9.4  | 9.0  | DEFB129  |
| 8560   | 1.0   | -1.6 | 1.0  | 1.0  | DEGS1    |
| 57706  | 1.0   | -3.8 | 1.0  | 1.0  | DENND1A  |
| 27147  | 2.9   | -2.5 | 1.0  | -2.6 | DENND2A  |
| 55667  | 1.0   | 1.0  | 1.0  | 1.0  | DENND4C  |
| 160518 | 1.0   | 1.0  | 1.0  | 1.0  | DENND5B  |
| 55789  | 1.0   | 2.6  | 2.9  | 1.0  | DEPDC1B  |
| 9681   | 1.0   | -3.0 | 1.0  | 1.0  | DEPDC5   |
| 64798  | 1.0   | 1.0  | 1.0  | 1.0  | DEPTOR   |
| 8694   | 1.0   | 1.0  | 1.0  | 1.0  | DGAT1    |
| 8220   | 1.0   | 1.0  | 1.0  | 1.0  | DGCR14   |
| 1607   | 1.0   | 1.0  | 1.0  | 1.0  | DGKB     |
| 8526   | 1.0   | 1.0  | 1.0  | -2.8 | DGKE     |
| 160851 | 1.0   | 1.0  | 1.0  | 1.0  | DGKH     |
| 1716   | 1.0   | 1.0  | -3.9 | 1.0  | DGUOK    |
| 79947  | 1.0   | -4.8 | 1.0  | 1.0  | DHDDS    |
| 1719   | -17.4 | 1.6  | 1.0  | 1.0  | DHFR     |
| 1725   | 1.0   | -4.0 | 1.0  | 1.0  | DHPS     |
| 10202  | 1.0   | 1.0  | 2.6  | 1.0  | DHRS2    |
| 51635  | -2.9  | -4.0 | -3.5 | -3.4 | DHRS7    |
| 25979  | -1.9  | 1.0  | 1.0  | 1.0  | DHRS7B   |
| 201140 | 1.0   | 1.0  | 2.5  | 1.0  | DHRS7C   |
| 10170  | 1.0   | 1.0  | 1.0  | 3.7  | DHRS9    |
| 9704   | 1.0   | 1.0  | -3.3 | 1.0  | DHX34    |
| 57647  | 7.6   | 1.0  | 4.0  | 1.0  | DHX37    |

|        |       |      |      |      |                |
|--------|-------|------|------|------|----------------|
| 90957  | 1.0   | -3.6 | 1.0  | 1.0  | DHX57          |
| 1660   | 1.0   | 1.0  | 1.0  | 1.0  | DHX9           |
| 1734   | 1.0   | 1.0  | 5.3  | 1.0  | DIO2           |
| 1735   | 1.0   | 1.0  | -3.0 | 1.0  | DIO3           |
| 22982  | 1.0   | 1.0  | 2.8  | 4.5  | DIP2C          |
| 148252 | 1.0   | 3.4  | 1.0  | 1.0  | DIRAS1         |
| 84925  | 1.0   | 1.0  | 1.0  | 1.0  | DIRC2          |
| 129563 | 1.6   | 1.0  | -6.5 | 1.0  | DIS3L2         |
| 27185  | 1.0   | 4.4  | 1.0  | 1.0  | DISC1          |
| 84976  | 1.0   | 1.0  | 1.0  | 1.0  | DISP1          |
| 1736   | -6.0  | 2.9  | 3.8  | 1.0  | DKC1           |
| 26082  | 1.0   | 1.0  | 1.0  | 1.0  | DKFZP434L187   |
| 222029 | 1.0   | 1.0  | 1.0  | 1.0  | DKFZp434L192   |
| 84237  | 1.0   | 1.0  | 1.0  | 1.0  | DKFZp547J222   |
| 26120  | 1.0   | 1.0  | 1.0  | -4.0 | DKFZP564C152   |
| 401232 | 1.0   | -1.6 | 1.0  | -1.9 | DKFZP686I15217 |
| 27121  | 1.0   | -6.2 | -8.9 | -4.6 | DKK4           |
| 10395  | 1.0   | 1.0  | 2.9  | 1.0  | DLC1           |
| 10301  | 1.0   | 1.0  | 4.5  | 1.0  | DLEU1          |
| 220107 | 1.0   | 1.0  | 1.0  | 1.0  | DLEU7          |
| 1740   | 1.0   | 1.0  | 5.3  | 5.1  | DLG2           |
| 1741   | 1.0   | 1.0  | 1.0  | -4.7 | DLG3           |
| 58512  | 1.0   | 1.0  | 1.0  | 1.0  | DLGAP3         |
| 54567  | 1.0   | 1.0  | 1.0  | 3.1  | DLL4           |
| 1743   | 1.0   | 1.0  | 4.2  | 1.0  | DLST           |
| 1745   | 1.0   | -4.6 | -4.8 | -5.4 | DLX1           |
| 1747   | 2.1   | 1.0  | 1.0  | 1.0  | DLX3           |
| 55929  | 2.2   | 1.0  | -3.0 | 1.0  | DMAP1          |
| 1755   | 1.0   | 1.0  | -3.7 | 1.0  | DMBT1          |
| 1756   | 1.0   | 1.0  | -3.1 | -3.3 | DMD            |
| 29958  | 1.0   | 1.0  | 1.0  | 1.0  | DMGDH          |
| 93099  | 1.0   | 1.0  | 1.0  | 1.0  | DMKN           |
| 10655  | 2.4   | 2.6  | 4.1  | 1.0  | DMRT2          |
| 58524  | 1.0   | 1.0  | 1.0  | 1.0  | DMRT3          |
| 23312  | 1.0   | 1.0  | 1.0  | 1.0  | DMXL2          |
| 123872 | 1.0   | 1.0  | 1.0  | 1.0  | DNAAF1         |
| 196385 | 1.0   | 1.0  | 1.9  | 1.0  | DNAH10         |
| 8701   | 1.0   | 1.0  | 1.0  | 1.0  | DNAH11         |
| 201625 | 1.0   | 1.0  | 1.0  | 5.7  | DNAH12         |
| 146754 | 3.7   | 4.1  | 1.0  | 1.0  | DNAH2          |
| 55567  | 4.2   | 1.0  | 1.0  | 1.0  | DNAH3          |
| 1768   | 1.0   | 1.0  | -4.7 | 1.0  | DNAH6          |
| 56171  | -14.4 | 2.4  | 3.0  | 1.0  | DNAH7          |
| 27019  | 1.0   | 1.0  | -6.7 | 1.0  | DNAI1          |
| 9093   | 1.0   | 4.1  | 5.0  | 3.9  | DNAJA3         |
| 55466  | 1.0   | 1.0  | 1.0  | 1.0  | DNAJA4         |
| 51726  | 1.0   | 1.0  | -3.1 | 1.0  | DNAJB11        |
| 10049  | -2.4  | 1.0  | 2.7  | 5.0  | DNAJB6         |

|           |      |      |      |      |          |
|-----------|------|------|------|------|----------|
| 165721    | 1.0  | 1.0  | -3.9 | 1.0  | DNAJB8   |
| 64215     | 1.0  | 1.0  | -1.9 | 1.0  | DNAJC1   |
| 85406     | 1.0  | 1.0  | 1.0  | 1.0  | DNAJC14  |
| 23341     | 1.0  | 1.0  | 1.0  | 1.0  | DNAJC16  |
| 202052    | 5.8  | 1.0  | 1.0  | 2.4  | DNAJC18  |
| 134218    | 1.0  | -3.8 | -3.8 | 1.0  | DNAJC21  |
| 84277     | -1.6 | 5.2  | 1.0  | 1.0  | DNAJC30  |
| 3338      | 2.8  | 1.0  | 1.0  | -3.4 | DNAJC4   |
| 80331     | 1.0  | -3.2 | -4.0 | -3.1 | DNAJC5   |
| 85479     | 1.0  | -3.0 | 1.0  | 1.0  | DNAJC5B  |
| 23234     | 1.0  | 1.0  | 3.0  | 1.0  | DNAJC9   |
| 1775      | 1.0  | 1.0  | 1.0  | 1.0  | DNASE1L2 |
| 373863    | 1.0  | 1.0  | 4.8  | 4.8  | DND1     |
| 1759      | 1.0  | 1.0  | 1.0  | 1.0  | DNM1     |
| 10059     | 1.0  | 1.0  | 1.0  | 4.0  | DNM1L    |
| 23268     | 1.0  | 1.0  | 1.0  | 1.0  | DNMBP    |
| 1788      | 1.0  | -3.2 | 1.0  | 1.0  | DNMT3A   |
| 23549     | 1.0  | 4.1  | 5.0  | 4.7  | DNPEP    |
| 116092    | 1.0  | 1.0  | 1.0  | 1.0  | DNTTIP1  |
| 8448      | 1.0  | 1.0  | 5.3  | 1.0  | DOC2A    |
| 8447      | 1.0  | 1.0  | 1.0  | 1.0  | DOC2B    |
| 1794      | 1.0  | 1.0  | 1.0  | 1.0  | DOCK2    |
| 1795      | 6.7  | 1.0  | 1.0  | 1.0  | DOCK3    |
| 23348     | 3.9  | 1.0  | 1.0  | 1.0  | DOCK9    |
| 83475     | 1.0  | 1.0  | 1.0  | 1.0  | DOHH     |
| 9046      | -2.0 | -6.9 | -6.9 | 1.0  | DOK2     |
| 285489    | 1.0  | 1.0  | 2.5  | 1.0  | DOK7     |
| 29980     | 1.0  | 1.0  | 1.0  | 1.0  | DONSON   |
| 23033     | 1.0  | 1.0  | 1.0  | 1.0  | DOPEY1   |
| 84444     | 1.0  | 1.0  | 1.0  | 1.0  | DOT1L    |
| 1798      | 1.0  | 1.0  | 1.0  | 1.0  | DPAGT1   |
| 1800      | 1.0  | 1.0  | 1.0  | 1.0  | DPEP1    |
| 64174     | 1.0  | 1.0  | -2.7 | 1.0  | DPEP2    |
| 8110      | -2.2 | 1.0  | 1.0  | 1.0  | DPF3     |
| 285381    | 1.0  | 1.0  | -6.3 | 1.0  | DPH3     |
| 100132911 | 1.0  | 1.0  | 1.0  | 1.0  | DPH3P1   |
| 54344     | 1.0  | 1.0  | 1.0  | 1.0  | DPM3     |
| 1804      | -2.3 | 1.0  | -5.9 | 1.0  | DPP6     |
| 29952     | 1.6  | 1.0  | 1.0  | 1.0  | DPP7     |
| 54878     | -4.8 | 1.0  | -8.6 | 1.0  | DPP8     |
| 91039     | 1.0  | 1.0  | 1.0  | 1.0  | DPP9     |
| 151871    | 1.0  | 1.0  | 1.0  | 1.0  | DPPA2    |
| 1806      | 1.0  | 1.0  | 1.0  | 1.0  | DPYD     |
| 1809      | 1.0  | 5.1  | 7.1  | 2.9  | DPYSL3   |
| 10570     | 1.7  | 1.0  | 1.0  | 1.0  | DPYSL4   |
| 56896     | 1.0  | 1.0  | 1.0  | 1.0  | DPYSL5   |
| 55332     | 4.1  | 1.0  | 1.0  | 1.0  | DRAM1    |
| 1814      | 1.0  | 1.0  | 3.2  | 1.0  | DRD3     |

|        |      |      |      |      |          |
|--------|------|------|------|------|----------|
| 1815   | 5.1  | 1.0  | 1.0  | -1.9 | DRD4     |
| 1816   | 1.0  | 1.0  | 1.0  | 1.0  | DRD5     |
| 4733   | -1.6 | 1.0  | 1.0  | 1.0  | DRG1     |
| 1823   | 1.0  | -3.8 | 1.0  | 1.0  | DSC1     |
| 1824   | 1.0  | 3.3  | 2.7  | 2.7  | DSC2     |
| 1825   | 6.9  | 1.0  | 4.6  | 1.0  | DSC3     |
| 10281  | 4.9  | 1.0  | 1.0  | 1.0  | DSCR4    |
| 53820  | -2.2 | 1.0  | 1.0  | 1.0  | DSCR6    |
| 147409 | 1.0  | 1.0  | 1.0  | 1.0  | DSG4     |
| 1834   | 1.0  | 1.0  | 1.0  | -3.9 | DSPP     |
| 667    | 4.7  | 1.0  | -4.7 | -4.4 | DST      |
| 11034  | 1.0  | 1.0  | 1.0  | 1.0  | DSTN     |
| 51514  | 1.0  | 1.0  | 1.0  | 1.0  | DTL      |
| 1837   | 1.0  | 1.0  | 1.0  | 1.0  | DTNA     |
| 1838   | 1.0  | 1.0  | 1.0  | 1.0  | DTNB     |
| 196403 | 2.1  | 1.0  | 1.0  | 1.0  | DTX3     |
| 23220  | 1.0  | -3.8 | 1.0  | 1.0  | DTX4     |
| 53905  | 1.0  | 1.0  | 1.0  | 1.0  | DUOX1    |
| 50506  | 1.0  | 1.0  | 1.0  | 1.0  | DUOX2    |
| 90527  | 1.0  | 1.0  | 1.0  | 1.0  | DUOXA1   |
| 405753 | 1.0  | 1.0  | 1.0  | 1.0  | DUOXA2   |
| 64118  | 1.0  | 1.0  | 1.0  | 3.2  | DUS1L    |
| 54920  | 1.0  | 1.0  | 1.0  | 1.0  | DUS2L    |
| 1843   | 1.0  | 1.0  | 1.0  | 1.0  | DUSP1    |
| 51207  | 1.0  | 1.0  | 2.7  | 1.0  | DUSP13   |
| 11072  | 1.0  | 3.1  | 1.0  | 1.0  | DUSP14   |
| 574029 | -8.4 | 5.3  | 1.0  | 1.0  | DUSP5P   |
| 1848   | 1.0  | 1.0  | 1.0  | 1.0  | DUSP6    |
| 1850   | 1.0  | 1.0  | 1.0  | 1.0  | DUSP8    |
| 1852   | 1.0  | 1.0  | 1.0  | -2.4 | DUSP9    |
| 1855   | -2.0 | 1.0  | -1.6 | 1.0  | DVL1     |
| 1857   | -2.6 | 1.0  | 1.0  | 1.0  | DVL3     |
| 1780   | 1.0  | 1.0  | 1.0  | 1.0  | DYNC1I1  |
| 51626  | 1.0  | 1.0  | 1.0  | 1.0  | DYNC2LI1 |
| 8655   | 1.0  | 1.0  | 1.0  | 1.0  | DYNLL1   |
| 140735 | 1.0  | 1.0  | 2.6  | 1.0  | DYNLL2   |
| 83658  | 1.0  | 1.0  | 1.0  | 1.0  | DYNLRB1  |
| 83657  | 1.0  | 1.0  | -4.1 | -3.6 | DYNLRB2  |
| 9149   | 1.0  | 1.0  | 1.0  | 3.4  | DYRK1B   |
| 8445   | 1.6  | 2.5  | 1.0  | 1.0  | DYRK2    |
| 8444   | 1.0  | 1.0  | -4.7 | 1.0  | DYRK3    |
| 55184  | 1.7  | 5.7  | 1.0  | 1.0  | DZANK1   |
| 1871   | 1.0  | 1.0  | 1.0  | 3.3  | E2F3     |
| 1874   | 2.0  | 1.0  | -2.9 | -2.9 | E2F4     |
| 9166   | 1.0  | 1.0  | 1.0  | 1.0  | EBAG9    |
| 1879   | 1.9  | 1.0  | 1.0  | 1.0  | EBF1     |
| 64641  | 1.0  | 1.0  | 1.0  | 1.0  | EBF2     |
| 253738 | -7.1 | 1.0  | 1.0  | 1.0  | EBF3     |



|        |       |      |      |      |          |
|--------|-------|------|------|------|----------|
| 10969  | 1.0   | 2.8  | 2.9  | 2.9  | EBNA1BP2 |
| 84650  | 1.0   | 1.0  | -2.5 | -2.5 | EBPL     |
| 11319  | 1.0   | 1.0  | -3.0 | -2.6 | ECD      |
| 1889   | 1.0   | 1.0  | 1.0  | 1.0  | ECE1     |
| 9718   | 10.0  | 1.8  | 1.0  | 1.0  | ECE2     |
| 9427   | 1.0   | 1.0  | 1.0  | 1.0  | ECEL1    |
| 347694 | 1.0   | 1.0  | 1.0  | 1.0  | ECEL1P2  |
| 55862  | -12.0 | 1.0  | 1.0  | 1.0  | ECHDC1   |
| 345930 | 1.0   | 1.0  | 2.8  | 1.0  | ECT2L    |
| 1896   | 1.0   | 1.0  | 1.0  | 1.0  | EDA      |
| 10913  | 1.0   | 1.0  | -2.2 | 1.0  | EDAR     |
| 10876  | 1.0   | 1.0  | 1.0  | 1.0  | EDDM3A   |
| 64184  | 6.2   | 1.0  | 1.0  | 1.0  | EDDM3B   |
| 55741  | 1.0   | 1.0  | 1.0  | -4.5 | EDEM2    |
| 80267  | 1.0   | 1.0  | 1.0  | 1.0  | EDEM3    |
| 1906   | 1.0   | 1.0  | -2.4 | 1.0  | EDN1     |
| 1907   | 1.0   | 3.0  | 1.0  | 1.0  | EDN2     |
| 1909   | 1.0   | 1.5  | 1.0  | 1.0  | EDNRA    |
| 1910   | 2.2   | -7.4 | -5.2 | -1.7 | EDNRB    |
| 9521   | 2.3   | -2.7 | 1.0  | 1.0  | EEF1E1   |
| 60678  | 1.0   | 6.1  | 1.0  | 5.4  | EEFSEC   |
| 80820  | 1.0   | 5.4  | 5.8  | 5.2  | EEPD1    |
| 79645  | 1.0   | 1.0  | 3.2  | 1.0  | EFCAB1   |
| 90141  | 1.0   | -6.4 | -5.7 | 1.0  | EFCAB11  |
| 84455  | 1.0   | 1.0  | 1.0  | -3.2 | EFCAB7   |
| 1942   | 1.0   | 1.0  | -3.8 | -3.8 | EFNA1    |
| 1943   | 1.0   | 1.0  | 1.0  | -3.4 | EFNA2    |
| 1944   | 1.0   | 1.0  | 1.0  | 1.0  | EFNA3    |
| 1947   | 1.6   | 1.0  | 1.0  | 1.0  | EFNB1    |
| 1948   | 1.0   | 4.4  | 1.0  | 1.0  | EFNB2    |
| 23167  | -25.4 | 1.0  | 7.3  | 1.0  | EFR3A    |
| 22979  | -3.9  | 1.0  | 2.2  | 1.0  | EFR3B    |
| 93556  | 1.0   | 1.0  | 1.0  | -3.7 | EGFEM1P  |
| 51162  | 1.0   | 1.0  | -2.9 | 1.0  | EGFL7    |
| 80864  | -1.7  | -5.0 | -6.4 | -4.3 | EGFL8    |
| 133584 | 1.0   | 1.0  | 1.0  | 1.0  | EGFLAM   |
| 1956   | 1.0   | 1.0  | -2.2 | 1.0  | EGFR     |
| 112398 | 1.0   | -2.8 | -2.6 | 1.0  | EGLN2    |
| 1958   | 1.0   | 4.2  | 1.0  | 1.0  | EGR1     |
| 23301  | -2.1  | 1.0  | 1.0  | 1.0  | EHBP1    |
| 10938  | 1.0   | 2.8  | 1.0  | 1.0  | EHD1     |
| 163126 | 1.0   | 1.0  | 1.0  | 1.0  | EID2     |
| 10209  | 1.0   | 2.4  | 1.0  | 1.0  | EIF1     |
| 84285  | 1.7   | 9.0  | 6.6  | 8.9  | EIF1AD   |
| 9086   | 1.0   | 1.0  | -3.4 | -3.4 | EIF1AY   |
| 1967   | -5.5  | 1.0  | 1.0  | -3.6 | EIF2B1   |
| 8893   | 1.0   | 1.0  | 2.8  | 1.0  | EIF2B5   |
| 26523  | 1.0   | 3.4  | 3.4  | 1.0  | EIF2C1   |

|        |      |      |      |      |           |
|--------|------|------|------|------|-----------|
| 1939   | 1.0  | -2.6 | -2.4 | 1.0  | EIF2D     |
| 8894   | 1.0  | 1.0  | 1.0  | 1.0  | EIF2S2    |
| 8664   | 1.0  | 1.0  | 1.0  | 1.0  | EIF3D     |
| 8666   | 1.0  | -2.7 | 1.0  | 1.0  | EIF3G     |
| 8669   | 1.0  | 1.0  | 1.0  | 1.0  | EIF3J     |
| 51386  | 1.0  | 1.0  | 1.0  | 1.0  | EIF3L     |
| 10480  | 2.9  | 1.0  | -3.3 | -2.8 | EIF3M     |
| 1973   | -3.0 | -2.6 | 1.0  | 1.0  | EIF4A1    |
| 9470   | 1.0  | 1.0  | 1.0  | 1.0  | EIF4E2    |
| 56478  | 1.0  | -2.8 | -2.7 | 1.0  | EIF4ENIF1 |
| 8672   | 1.0  | 1.0  | 1.0  | 1.0  | EIF4G3    |
| 1984   | 1.0  | -3.1 | 1.0  | 1.0  | EIF5A     |
| 9669   | 1.0  | 1.0  | 1.0  | 1.0  | EIF5B     |
| 3692   | -2.1 | -1.9 | 1.0  | 1.0  | EIF6      |
| 60528  | 1.0  | 1.0  | 1.0  | 1.0  | ELAC2     |
| 1994   | 1.0  | 1.0  | 4.9  | 1.0  | ELAVL1    |
| 1997   | -5.8 | 1.0  | 1.0  | 1.0  | ELF1      |
| 1998   | 1.0  | 1.0  | 1.0  | 1.0  | ELF2      |
| 2002   | 1.0  | 1.0  | 2.4  | 1.0  | ELK1      |
| 2005   | 1.0  | 1.0  | 4.8  | 1.0  | ELK4      |
| 80237  | -4.3 | 1.0  | 1.0  | 1.0  | ELL3      |
| 63916  | 1.0  | 1.0  | 1.0  | 1.0  | ELMO2     |
| 64834  | 1.6  | 1.0  | 1.0  | 2.4  | ELOVL1    |
| 83401  | 8.2  | 1.0  | 10.0 | 10.9 | ELOVL3    |
| 79071  | 1.0  | 1.0  | 1.0  | 1.0  | ELOVL6    |
| 51705  | 1.0  | 1.0  | 1.0  | 1.0  | EMCN      |
| 2010   | 1.0  | 1.0  | 2.5  | 3.0  | EMD       |
| 84034  | 14.4 | 1.0  | 11.6 | 1.0  | EMILIN2   |
| 90187  | 1.0  | 1.0  | 1.0  | 1.0  | EMILIN3   |
| 2009   | 1.0  | 1.0  | 5.7  | 1.0  | EML1      |
| 27436  | 1.9  | 1.0  | -5.7 | 1.0  | EML4      |
| 2012   | 1.0  | 2.4  | 1.0  | 3.7  | EMP1      |
| 326342 | 18.2 | 1.0  | 20.8 | 1.0  | EMR4P     |
| 2016   | 1.0  | 1.0  | 1.0  | -5.8 | EMX1      |
| 2019   | -1.9 | 1.0  | 1.0  | 1.0  | EN1       |
| 55740  | 1.0  | 1.0  | 30.6 | 1.0  | ENAH      |
| 8507   | 1.0  | 1.0  | 1.7  | 1.0  | ENC1      |
| 23052  | 1.0  | 1.0  | 1.0  | 1.0  | ENDOD1    |
| 284131 | 1.0  | 1.0  | 1.0  | 1.0  | ENDOV     |
| 2022   | 1.8  | 1.0  | 1.0  | 1.0  | ENG       |
| 64772  | 1.0  | -1.6 | -1.6 | 1.0  | ENGASE    |
| 375704 | 1.0  | -4.5 | -4.3 | 1.0  | ENHO      |
| 219670 | 1.0  | -5.3 | 1.0  | 1.0  | ENKUR     |
| 55556  | 1.0  | 1.0  | 1.0  | 1.0  | ENOSF1    |
| 10495  | 1.0  | -4.0 | 1.0  | 1.0  | ENOX2     |
| 5167   | 3.0  | 1.0  | 7.0  | 1.0  | ENPP1     |
| 955    | 1.0  | 1.0  | 1.0  | 1.0  | ENTPD6    |
| 2036   | 1.0  | 1.0  | 2.9  | 3.0  | EPB41L1   |

|        |       |      |      |      |              |
|--------|-------|------|------|------|--------------|
| 114915 | 1.0   | 1.0  | 1.0  | 1.0  | EPB41L4A-AS1 |
| 54566  | 1.0   | 4.8  | 4.7  | 3.0  | EPB41L4B     |
| 2039   | 1.0   | 1.0  | 1.0  | 3.3  | EPB49        |
| 26122  | -13.0 | 1.0  | 1.0  | 1.0  | EPC2         |
| 284656 | 1.0   | -7.3 | 1.0  | 1.0  | EPHA10       |
| 1969   | 1.0   | 1.0  | 1.0  | 1.0  | EPHA2        |
| 2045   | 1.0   | 1.0  | 1.0  | 1.0  | EPHA7        |
| 2046   | 1.0   | 1.0  | 3.6  | 1.9  | EPHA8        |
| 2047   | 1.9   | 1.0  | -2.5 | 1.0  | EPHB1        |
| 2051   | 1.0   | 1.0  | 1.0  | -2.3 | EPHB6        |
| 2052   | -4.3  | 1.0  | 1.0  | 1.0  | EPHX1        |
| 253152 | 1.0   | 1.0  | 1.0  | 1.0  | EPHX4        |
| 55040  | 1.0   | -5.2 | 1.0  | 1.0  | EPN3         |
| 2057   | 3.7   | 1.0  | 1.0  | 1.0  | EPOR         |
| 2060   | 1.0   | 1.0  | 1.0  | 1.0  | EPS15        |
| 58513  | 2.3   | 4.4  | 4.0  | 1.0  | EPS15L1      |
| 54869  | 1.0   | -2.7 | 1.0  | 1.0  | EPS8L1       |
| 94240  | 1.0   | -2.9 | 1.0  | -3.4 | EPST11       |
| 26284  | 1.0   | 1.0  | 1.0  | -2.9 | ERAL1        |
| 2064   | 1.9   | -1.6 | 2.2  | 1.0  | ERBB2        |
| 55914  | 1.0   | 1.0  | 1.0  | 1.0  | ERBB2IP      |
| 2066   | 1.0   | 2.9  | 1.0  | 2.6  | ERBB4        |
| 2067   | 1.0   | 1.0  | 1.0  | 1.0  | ERCC1        |
| 2073   | 1.0   | 3.1  | 3.2  | 2.6  | ERCC5        |
| 51614  | 1.0   | 1.0  | 1.0  | 1.0  | ERGIC3       |
| 2079   | 1.0   | 1.0  | 1.0  | 2.5  | ERH          |
| 90459  | 1.0   | 1.0  | 1.0  | 1.0  | ERI1         |
| 79033  | 2.8   | 1.0  | 1.0  | -2.3 | ERI3         |
| 10613  | 1.0   | -3.3 | -3.0 | 1.0  | ERLIN1       |
| 11160  | 1.0   | -2.4 | 1.0  | 1.0  | ERLIN2       |
| 57471  | -7.5  | 1.0  | -2.2 | 1.0  | ERMN         |
| 79956  | 1.0   | 1.0  | 1.0  | 1.0  | ERMP1        |
| 10961  | -2.8  | -4.7 | -4.7 | -4.7 | ERP29        |
| 54206  | 1.0   | 5.0  | 1.0  | 1.0  | ERRF11       |
| 90952  | -7.8  | 1.0  | 1.0  | 1.0  | ESAM         |
| 2098   | 1.0   | 1.0  | 1.0  | 1.0  | ESD          |
| 9700   | 1.0   | 1.0  | 2.4  | 1.0  | ESPL1        |
| 83715  | 1.0   | 1.0  | 1.0  | 1.0  | ESPN         |
| 2099   | 2.0   | 1.0  | 1.0  | 2.1  | ESR1         |
| 2100   | 1.0   | 1.0  | 1.0  | 1.0  | ESR2         |
| 54845  | 1.0   | 1.0  | 1.0  | 1.0  | ESRP1        |
| 80004  | 1.8   | 1.0  | 1.0  | 1.0  | ESRP2        |
| 2101   | 1.0   | -2.7 | -2.5 | -2.5 | ESRRA        |
| 57488  | 1.0   | 1.0  | 1.0  | 1.0  | ESYT2        |
| 83850  | 1.0   | -2.6 | 1.0  | 1.0  | ESYT3        |
| 54465  | 4.0   | 2.7  | 1.0  | -2.0 | ETAA1        |
| 2109   | 1.7   | -3.4 | -3.4 | -3.5 | ETFB         |
| 23474  | 1.0   | 1.0  | 1.0  | -3.8 | ETHE1        |

|        |      |      |      |      |         |
|--------|------|------|------|------|---------|
| 55500  | -8.3 | 1.0  | 1.0  | 1.0  | ETNK1   |
| 2115   | 1.0  | 1.0  | -5.1 | 1.0  | ETV1    |
| 2117   | 1.0  | 1.0  | 1.0  | 1.0  | ETV3    |
| 645027 | -1.9 | 1.0  | 1.0  | 1.0  | EVPLL   |
| 2130   | 1.0  | -2.9 | 1.0  | 1.0  | EWSR1   |
| 161829 | 1.0  | 1.0  | 1.0  | 3.8  | EXD1    |
| 54932  | 1.0  | 1.0  | 1.0  | 1.0  | EXD3    |
| 9156   | 1.0  | 1.0  | 1.0  | 1.0  | EXO1    |
| 55763  | 1.0  | 1.0  | -3.4 | -3.5 | EXOC1   |
| 283849 | 1.0  | 1.0  | 1.0  | 1.0  | EXOC3L1 |
| 91828  | 1.0  | 1.0  | 3.6  | 1.0  | EXOC3L4 |
| 54536  | 1.0  | 2.0  | -6.4 | -7.6 | EXOC6   |
| 23233  | 1.0  | 1.0  | 1.0  | 1.0  | EXOC6B  |
| 23265  | 1.0  | 1.0  | 1.0  | 1.0  | EXOC7   |
| 9941   | 1.0  | 1.0  | 1.0  | 1.0  | EXOG    |
| 23404  | 1.0  | -3.1 | 1.0  | 1.0  | EXOSC2  |
| 54512  | 4.0  | 6.0  | 1.0  | 1.0  | EXOSC4  |
| 56915  | 1.0  | -3.5 | 1.0  | 1.0  | EXOSC5  |
| 2131   | 1.9  | 1.0  | 1.0  | -3.1 | EXT1    |
| 2134   | -2.1 | 4.7  | 5.2  | 6.0  | EXTL1   |
| 2137   | 1.0  | 1.0  | 2.7  | 2.7  | EXTL3   |
| 2138   | 1.0  | 1.0  | 1.0  | 2.6  | EYA1    |
| 2139   | 1.0  | 1.0  | 5.5  | 1.0  | EYA2    |
| 7430   | 1.0  | 1.0  | 1.0  | 4.8  | EZR     |
| 2160   | 1.0  | 1.0  | 1.0  | 1.0  | F11     |
| 2149   | 1.0  | 1.0  | 1.0  | -3.3 | F2R     |
| 2157   | 1.0  | -4.2 | -3.9 | -3.9 | F8      |
| 8263   | 6.3  | 8.2  | 8.4  | 1.0  | F8A1    |
| 2158   | 1.0  | 1.0  | 1.0  | 7.9  | F9      |
| 2166   | 1.0  | 1.0  | 1.0  | 1.0  | FAAH    |
| 646486 | 1.0  | 1.0  | -7.2 | 1.0  | FABP12  |
| 8772   | 1.0  | 2.4  | 1.6  | 1.0  | FADD    |
| 3992   | 1.0  | 1.0  | 1.0  | 1.0  | FADS1   |
| 283985 | 1.0  | 1.0  | 1.0  | 1.0  | FADS6   |
| 23197  | -1.6 | 1.0  | 1.7  | 1.0  | FAF2    |
| 81889  | 1.0  | 1.0  | 1.0  | 3.9  | FAHD1   |
| 51011  | 1.0  | 1.0  | 1.0  | 1.0  | FAHD2A  |
| 283991 | 1.0  | -2.8 | 1.0  | 1.0  | FAM100B |
| 284611 | 1.0  | 1.0  | 1.0  | 1.0  | FAM102B |
| 83641  | 1.0  | 1.0  | 1.0  | -5.9 | FAM107B |
| 83541  | 1.0  | 1.0  | -1.8 | 1.0  | FAM110A |
| 91523  | 1.0  | 4.1  | 1.0  | 1.7  | FAM113B |
| 9747   | 1.0  | 1.0  | 1.0  | 1.0  | FAM115A |
| 285966 | 1.0  | 2.8  | 2.6  | 1.0  | FAM115C |
| 201627 | 1.0  | 1.0  | 1.0  | 1.0  | FAM116A |
| 150864 | 1.0  | 1.0  | 1.0  | 1.0  | FAM117B |
| 55007  | 1.0  | 1.0  | -2.1 | 1.0  | FAM118A |
| 79607  | 1.0  | -7.1 | -5.3 | -6.2 | FAM118B |

|           |     |      |      |      |               |
|-----------|-----|------|------|------|---------------|
| 84498     | 1.0 | 27.3 | 1.0  | 1.0  | FAM120B       |
| 54954     | 1.0 | 1.0  | 1.0  | 2.5  | FAM120C       |
| 159090    | 1.0 | 1.0  | 1.0  | 1.0  | FAM122B       |
| 159091    | 1.0 | 1.0  | 1.0  | 1.0  | FAM122C       |
| 139285    | 1.0 | 1.0  | 1.0  | 1.0  | FAM123B       |
| 220108    | 1.0 | 1.0  | -5.8 | 1.0  | FAM124A       |
| 79843     | 1.0 | 1.0  | -3.5 | 1.0  | FAM124B       |
| 26071     | 1.0 | 1.0  | 1.0  | 1.0  | FAM127B       |
| 116496    | 1.0 | -3.9 | -3.4 | 1.0  | FAM129A       |
| 199786    | 1.0 | 1.0  | 1.0  | 1.0  | FAM129C       |
| 131408    | 1.0 | 1.0  | 1.6  | 1.0  | FAM131A       |
| 388581    | 1.0 | 1.0  | 5.6  | 1.0  | FAM132A       |
| 257415    | 1.0 | 1.0  | 1.0  | 1.0  | FAM133B       |
| 79137     | 1.0 | 1.0  | 1.0  | 1.0  | FAM134A       |
| 54463     | 1.0 | 1.0  | 1.0  | 3.1  | FAM134B       |
| 57579     | 1.0 | 1.0  | 1.0  | 1.0  | FAM135A       |
| 84908     | 1.0 | 2.2  | 1.0  | 2.2  | FAM136A       |
| 317662    | 1.0 | 1.0  | 1.0  | 1.0  | FAM149B1      |
| 338094    | 1.0 | 1.0  | 1.0  | 1.0  | FAM151A       |
| 158297    | 1.0 | 1.0  | 1.0  | 1.0  | FAM154A       |
| 27112     | 1.0 | 1.8  | 1.0  | 1.0  | FAM155B       |
| 29057     | 1.0 | 1.0  | 1.0  | 1.0  | FAM156A       |
| 51016     | 1.0 | 1.0  | 1.0  | 1.0  | FAM158A       |
| 57700     | 1.0 | 1.0  | 5.0  | 1.0  | FAM160B1      |
| 221303    | 1.0 | 1.0  | 1.0  | 1.0  | FAM162B       |
| 148753    | 1.0 | 1.0  | 1.0  | 1.0  | FAM163A       |
| 51101     | 1.0 | 1.0  | 1.0  | 1.0  | FAM164A       |
| 23201     | 1.0 | 1.0  | 1.0  | 1.0  | FAM168A       |
| 340069    | 1.0 | 1.0  | 4.6  | 1.0  | FAM170A       |
| 221061    | 1.0 | 1.0  | 1.0  | -2.8 | FAM171A1      |
| 65990     | 1.0 | 1.0  | 1.0  | 6.9  | FAM173A       |
| 134145    | 1.0 | 1.0  | 1.0  | 1.0  | FAM173B       |
| 84141     | 1.0 | 4.0  | 1.0  | 1.0  | FAM176A       |
| 55719     | 1.0 | 1.0  | 2.5  | 1.0  | FAM178A       |
| 90050     | 1.0 | 1.0  | 1.0  | -1.6 | FAM181A       |
| 220382    | 1.0 | 1.0  | 3.8  | 5.0  | FAM181B       |
| 440585    | 1.0 | -1.8 | -1.9 | 1.0  | FAM183A       |
| 340286    | 1.0 | -5.6 | 1.0  | -8.7 | FAM183B       |
| 79632     | 1.0 | 1.0  | -3.8 | 1.0  | FAM184A       |
| 148109    | 1.0 | 2.9  | 1.0  | 1.0  | FAM187B       |
| 10712     | 1.0 | 1.0  | 1.6  | 1.0  | FAM189B       |
| 201158    | 1.0 | 1.0  | 3.2  | 1.0  | FAM18B2       |
| 100533496 | 1.0 | 1.0  | 1.0  | 1.0  | FAM18B2-CDRT4 |
| 54462     | 1.0 | 4.7  | 6.5  | 1.0  | FAM190B       |
| 80011     | 1.0 | 1.0  | 1.0  | 1.0  | FAM192A       |
| 8603      | 1.0 | 1.0  | 2.3  | 1.0  | FAM193A       |
| 54540     | 1.0 | -3.0 | 1.0  | 1.0  | FAM193B       |
| 131831    | 1.0 | 1.0  | 1.0  | 1.0  | FAM194A       |

|        |     |      |      |      |          |
|--------|-----|------|------|------|----------|
| 84331  | 1.0 | -7.2 | 1.0  | 1.0  | FAM195A  |
| 63877  | 1.0 | 1.0  | 1.8  | 2.0  | FAM204A  |
| 54942  | 1.0 | -7.1 | 1.0  | 1.0  | FAM206A  |
| 54757  | 1.0 | 1.0  | 1.0  | 1.0  | FAM20A   |
| 9917   | 1.0 | 1.0  | 1.0  | 1.0  | FAM20B   |
| 56975  | 1.0 | 1.0  | 1.0  | 1.0  | FAM20C   |
| 253725 | 1.0 | 2.4  | 1.0  | 1.0  | FAM21C   |
| 728130 | 1.0 | 1.0  | 1.0  | 1.0  | FAM22D   |
| 221301 | 1.0 | 1.0  | -3.2 | 1.0  | FAM26D   |
| 441168 | 1.0 | 1.0  | 1.0  | 1.0  | FAM26F   |
| 284123 | 1.0 | 1.0  | 1.0  | 1.0  | FAM27L   |
| 26017  | 1.0 | 1.0  | 3.6  | 1.0  | FAM32A   |
| 54537  | 1.0 | 4.0  | 1.0  | 1.0  | FAM35A   |
| 116228 | 1.0 | 1.0  | -6.1 | 1.0  | FAM36A   |
| 60343  | 1.0 | 1.0  | 1.0  | 2.9  | FAM3A    |
| 54097  | 1.0 | 1.0  | 1.8  | 1.0  | FAM3B    |
| 85369  | 1.0 | 1.0  | 1.0  | 1.0  | FAM40A   |
| 163933 | 1.0 | 1.0  | 1.0  | 1.0  | FAM43B   |
| 55603  | 1.0 | 1.0  | 1.0  | 1.0  | FAM46A   |
| 115572 | 1.0 | 2.1  | 1.0  | 2.0  | FAM46B   |
| 158724 | 1.0 | 1.0  | 1.0  | 1.0  | FAM47A   |
| 55578  | 1.0 | 1.0  | 2.4  | 2.5  | FAM48A   |
| 51571  | 1.0 | 3.8  | 4.2  | 3.4  | FAM49B   |
| 26240  | 1.0 | 2.6  | 2.6  | 1.0  | FAM50B   |
| 120400 | 1.0 | 1.0  | -5.7 | 1.0  | FAM55A   |
| 120406 | 1.0 | 1.0  | 1.0  | 1.0  | FAM55B   |
| 54827  | 1.0 | 8.3  | 1.0  | 5.6  | FAM55D   |
| 54629  | 1.0 | -7.5 | -8.0 | -7.7 | FAM63B   |
| 348013 | 1.0 | 1.0  | 1.6  | 1.0  | FAM70B   |
| 149647 | 1.0 | 2.3  | 1.0  | 1.0  | FAM71A   |
| 161142 | 1.0 | 1.0  | -7.7 | -6.0 | FAM71D   |
| 112703 | 1.0 | 1.0  | 1.0  | 1.0  | FAM71E1  |
| 84691  | 1.0 | 1.0  | 1.0  | -4.0 | FAM71F1  |
| 346653 | 1.0 | 1.0  | 5.3  | 1.0  | FAM71F2  |
| 401507 | 1.0 | 1.0  | 1.0  | 1.0  | FAM74A1  |
| 645961 | 1.0 | -3.0 | 1.0  | 1.0  | FAM75C2  |
| 149297 | 1.0 | 1.0  | -2.5 | 1.0  | FAM78B   |
| 151393 | 1.0 | 2.4  | 1.8  | 1.0  | FAM82A1  |
| 51115  | 1.0 | 1.0  | 2.3  | 1.0  | FAM82B   |
| 84985  | 1.0 | 1.0  | 1.0  | 2.6  | FAM83A   |
| 128876 | 1.0 | 1.0  | -4.6 | 1.0  | FAM83C   |
| 54854  | 1.0 | 1.0  | 1.0  | 1.0  | FAM83E   |
| 113828 | 1.0 | 1.0  | 1.0  | 1.0  | FAM83F   |
| 286077 | 1.0 | 1.0  | 1.0  | 1.0  | FAM83H   |
| 645332 | 1.0 | 1.0  | 1.0  | 1.0  | FAM86C2P |
| 692099 | 1.0 | 1.0  | 1.0  | 1.0  | FAM86DP  |
| 23625  | 1.0 | 3.2  | 3.1  | 1.0  | FAM89B   |
| 55138  | 1.0 | 1.0  | 1.0  | 1.0  | FAM90A1  |

|           |      |      |      |      |         |
|-----------|------|------|------|------|---------|
| 441317    | 1.0  | 1.0  | 1.0  | 1.0  | FAM90A7 |
| 100133036 | 1.0  | 1.0  | 1.0  | 1.0  | FAM95B1 |
| 51647     | 1.0  | 1.0  | 1.0  | 1.0  | FAM96B  |
| 147965    | 1.0  | 1.0  | 1.0  | 1.0  | FAM98C  |
| 171483    | 1.0  | 1.0  | 1.0  | 1.0  | FAM9B   |
| 171484    | 1.0  | 1.0  | -5.3 | 1.0  | FAM9C   |
| 2175      | 1.0  | 1.0  | 1.0  | 1.0  | FANCA   |
| 2177      | -4.6 | 5.7  | 1.0  | 4.8  | FANCD2  |
| 2178      | 1.0  | 1.0  | 1.0  | 1.0  | FANCE   |
| 57697     | 1.0  | 1.0  | -3.5 | 1.0  | FANCM   |
| 92565     | 1.0  | 1.0  | 1.0  | 1.0  | FANK1   |
| 84188     | 1.0  | -5.7 | -5.5 | -5.1 | FAR1    |
| 55711     | 1.0  | -7.0 | -6.2 | -7.0 | FAR2    |
| 10160     | 1.0  | 1.0  | 1.0  | 1.0  | FARP1   |
| 9855      | 1.0  | 1.0  | 1.0  | 1.0  | FARP2   |
| 10667     | 1.5  | -4.9 | 1.0  | 1.0  | FARS2   |
| 355       | 1.0  | 2.2  | 1.0  | 1.0  | FAS     |
| 356       | 1.0  | 1.0  | 1.0  | -2.2 | FASLG   |
| 2194      | 1.0  | 1.0  | 1.0  | 1.0  | FASN    |
| 10922     | 1.7  | 1.0  | 1.0  | 1.0  | FASTK   |
| 22868     | 8.5  | 1.0  | 1.0  | 1.0  | FASTKD2 |
| 79072     | 1.0  | 1.0  | 1.0  | 1.0  | FASTKD3 |
| 2195      | 1.0  | 5.6  | 1.0  | 1.0  | FAT1    |
| 79633     | 1.0  | -4.2 | -8.4 | -4.0 | FAT4    |
| 54751     | 1.0  | 1.0  | 1.0  | 1.0  | FBLIM1  |
| 345630    | 1.0  | 2.5  | 3.8  | 1.0  | FBLL1   |
| 2192      | 1.0  | 1.0  | 1.0  | 1.0  | FBLN1   |
| 129804    | 1.9  | 1.0  | 2.8  | 1.0  | FBLN7   |
| 2201      | 1.0  | 1.0  | 1.0  | 3.1  | FBN2    |
| 222235    | 1.0  | 1.0  | 3.8  | 1.0  | FBXL13  |
| 64839     | 1.0  | 1.0  | 1.0  | -4.5 | FBXL17  |
| 26224     | 1.0  | 1.0  | 1.0  | 1.0  | FBXL3   |
| 23194     | 23.3 | 15.0 | 1.0  | 15.0 | FBXL7   |
| 55336     | 1.0  | 1.0  | 1.0  | 1.0  | FBXL8   |
| 80204     | 1.0  | -2.0 | 1.0  | 1.0  | FBXO11  |
| 201456    | 1.0  | 1.0  | 1.0  | 1.0  | FBXO15  |
| 115290    | 1.0  | 1.0  | 1.0  | 1.0  | FBXO17  |
| 84893     | 1.0  | 1.0  | 1.0  | 1.0  | FBXO18  |
| 26232     | -4.4 | 1.0  | 1.0  | 1.0  | FBXO2   |
| 126433    | 1.0  | 1.0  | 1.0  | 1.0  | FBXO27  |
| 254170    | 1.0  | -4.0 | 1.0  | 1.0  | FBXO33  |
| 55030     | 1.0  | 1.0  | 1.0  | 1.0  | FBXO34  |
| 130888    | 1.0  | 1.0  | 1.0  | 1.0  | FBXO36  |
| 93611     | 1.0  | 1.0  | 4.3  | 1.0  | FBXO44  |
| 25793     | 1.0  | 1.0  | 1.0  | 1.0  | FBXO7   |
| 26268     | 1.6  | -4.4 | 1.0  | 1.0  | FBXO9   |
| 23291     | 1.0  | 1.0  | -2.8 | 1.0  | FBXW11  |
| 6468      | 1.0  | 1.0  | -2.0 | 1.0  | FBXW4   |

|        |      |      |      |      |            |
|--------|------|------|------|------|------------|
| 84261  | 1.0  | 1.0  | 1.0  | 2.2  | FBXW9      |
| 83953  | 2.3  | 1.0  | -1.8 | 1.0  | FCAMR      |
| 2204   | -3.2 | 1.0  | 1.0  | 1.0  | FCAR       |
| 2208   | 1.0  | 1.0  | 1.0  | 1.0  | FCER2      |
| 2212   | 1.0  | -3.4 | -3.3 | -3.8 | FCGR2A     |
| 2213   | 1.0  | 1.0  | -6.1 | -6.9 | FCGR2B     |
| 2214   | 1.0  | 1.8  | 1.0  | 2.5  | FCGR3A     |
| 2217   | 4.3  | 1.0  | 1.0  | 1.0  | FCGRT      |
| 115548 | 1.0  | 1.0  | 1.0  | 1.0  | FCHO2      |
| 9873   | 1.0  | 1.0  | 2.7  | 2.6  | FCHSD2     |
| 8547   | -5.1 | 1.0  | 1.0  | 1.0  | FCN3       |
| 115350 | 1.0  | 1.0  | 1.0  | -4.0 | FCRL1      |
| 79368  | 1.0  | 1.0  | -3.5 | 3.5  | FCRL2      |
| 83417  | 1.0  | 1.0  | -2.3 | -2.3 | FCRL4      |
| 83416  | 1.0  | 1.0  | 1.0  | 3.8  | FCRL5      |
| 84824  | 1.0  | 1.0  | 1.0  | 1.0  | FCRLA      |
| 127943 | 7.5  | 1.0  | 1.0  | 1.0  | FCRLB      |
| 2222   | 1.0  | 1.0  | 1.0  | 1.0  | FDFT1      |
| 2230   | 1.0  | 1.0  | 1.0  | 1.0  | FDX1       |
| 91893  | -9.1 | 1.0  | 1.7  | 1.0  | FDXACB1    |
| 2232   | 1.0  | 1.0  | 1.0  | 1.0  | FDXR       |
| 2235   | 1.0  | 3.4  | 1.0  | 5.0  | FECH       |
| 10116  | -2.2 | 1.0  | -4.0 | -4.0 | FEM1B      |
| 439941 | 1.0  | 1.0  | 1.0  | 1.0  | FER1L6-AS1 |
| 55612  | -5.0 | 1.0  | 1.0  | 1.0  | FERMT1     |
| 10979  | 1.0  | -6.5 | 1.0  | 1.0  | FERMT2     |
| 9637   | 1.0  | 1.0  | 1.0  | 1.0  | FEZ2       |
| 55079  | 1.0  | 1.0  | 1.0  | 1.0  | FEZF2      |
| 2245   | 1.0  | 5.1  | 1.0  | 1.0  | FGD1       |
| 221472 | 1.0  | 1.0  | 1.0  | 1.0  | FGD2       |
| 121512 | 1.0  | -3.0 | -2.1 | 1.0  | FGD4       |
| 2246   | 1.0  | 1.0  | 1.0  | 2.5  | FGF1       |
| 2257   | 1.0  | -7.5 | 1.0  | 1.0  | FGF12      |
| 2258   | -2.4 | -3.0 | 1.0  | 1.0  | FGF13      |
| 9965   | 1.0  | 1.0  | 2.5  | 1.0  | FGF19      |
| 26281  | 1.0  | 1.0  | 1.0  | 1.0  | FGF20      |
| 26291  | 1.0  | 1.0  | 1.0  | 1.0  | FGF21      |
| 27006  | 1.0  | 1.0  | 1.0  | 1.0  | FGF22      |
| 2248   | 1.8  | 1.0  | 1.0  | 1.0  | FGF3       |
| 2251   | 1.0  | -2.3 | 1.0  | 1.0  | FGF6       |
| 9982   | 1.0  | 3.7  | 1.0  | 1.0  | FGFBP1     |
| 83888  | 1.0  | 1.0  | 4.9  | 1.0  | FGFBP2     |
| 2260   | 1.0  | 1.0  | 1.0  | 1.0  | FGFR1      |
| 26127  | 1.0  | 1.0  | 1.0  | 1.0  | FGFR1OP2   |
| 2263   | -2.1 | -6.0 | 1.0  | 1.0  | FGFR2      |
| 2261   | 1.0  | 1.0  | 1.0  | 1.0  | FGFR3      |
| 2266   | -2.8 | 1.0  | -2.4 | -2.2 | FGG        |
| 2267   | 1.0  | 1.0  | 1.0  | 2.6  | FGL1       |



|        |       |      |      |      |         |
|--------|-------|------|------|------|---------|
| 2268   | 1.0   | 1.8  | 1.8  | 1.0  | FGR     |
| 114827 | 1.0   | 1.0  | 1.0  | 1.0  | FHAD1   |
| 2273   | -18.7 | 1.0  | 1.0  | 1.0  | FHL1    |
| 2275   | 1.0   | 1.0  | 1.0  | 1.0  | FHL3    |
| 55137  | -4.9  | 1.0  | 1.0  | 1.0  | FIGN    |
| 27145  | 1.0   | 1.0  | 4.8  | 4.7  | FILIP1  |
| 11259  | 2.0   | 4.1  | 3.7  | 3.7  | FILIP1L |
| 161247 | 1.0   | 2.3  | 2.5  | 1.0  | FITM1   |
| 84922  | 1.0   | 1.0  | 1.0  | 1.6  | FIZ1    |
| 51303  | 1.0   | 1.0  | 1.0  | 1.0  | FKBP11  |
| 2280   | 1.0   | 1.0  | 1.0  | 1.0  | FKBP1A  |
| 2286   | 1.0   | 1.0  | 1.0  | 1.0  | FKBP2   |
| 2218   | 1.0   | 1.0  | 1.0  | -2.8 | FKTN    |
| 201163 | 1.0   | 5.6  | 3.2  | 1.0  | FLCN    |
| 2312   | 1.0   | 1.0  | 1.0  | 1.0  | FLG     |
| 2316   | 2.6   | 1.0  | 1.0  | 4.3  | FLNA    |
| 2318   | -1.6  | 1.0  | 1.0  | 1.0  | FLNC    |
| 2319   | 1.0   | 1.0  | 1.0  | 1.0  | FLOT2   |
| 23768  | -2.5  | 1.0  | 1.0  | -3.0 | FLRT2   |
| 2321   | 1.0   | 1.0  | 1.0  | 1.0  | FLT1    |
| 2324   | 1.7   | 1.0  | 1.0  | 1.0  | FLT4    |
| 28982  | 1.0   | 1.0  | 2.4  | 1.0  | FLVCR1  |
| 84256  | 1.0   | -5.4 | -6.6 | -7.5 | FLYWCH1 |
| 56776  | 1.0   | 1.0  | 1.0  | -3.4 | FMN2    |
| 2326   | 1.0   | 1.0  | -2.1 | -1.8 | FMO1    |
| 2330   | 1.0   | 1.0  | 1.0  | 1.0  | FMO5    |
| 2331   | 1.0   | 1.0  | 1.0  | 1.0  | FMOD    |
| 252995 | 1.0   | 1.0  | 1.0  | 1.0  | FNDC5   |
| 2339   | 1.0   | 1.0  | 1.0  | 1.0  | FNTA    |
| 2342   | 8.5   | 1.0  | 1.0  | 1.0  | FNTB    |
| 219595 | 1.0   | 1.0  | 1.0  | 1.0  | FOLH1B  |
| 8061   | 1.0   | 1.0  | 3.0  | 1.0  | FOSL1   |
| 3169   | 1.0   | 1.0  | 1.0  | 1.0  | FOXA1   |
| 3170   | 1.5   | 1.0  | 1.0  | 3.6  | FOXA2   |
| 3171   | 1.0   | 2.8  | 1.0  | 1.0  | FOXA3   |
| 2298   | -7.2  | 1.0  | 1.0  | -6.7 | FOXD4   |
| 2304   | -3.8  | 1.0  | 1.0  | 1.0  | FOXE1   |
| 2295   | 1.0   | 1.0  | 1.0  | 1.0  | FOXF2   |
| 2299   | 1.0   | 1.0  | 2.9  | 1.0  | FOXI1   |
| 3607   | 1.0   | 1.0  | 1.0  | 1.0  | FOXK2   |
| 668    | 1.0   | 1.0  | 1.0  | 1.0  | FOXL2   |
| 2305   | 1.0   | 1.0  | 1.0  | 1.0  | FOXN1   |
| 1112   | 1.0   | 1.0  | 1.0  | 4.3  | FOXN3   |
| 2308   | 3.2   | 5.8  | 3.2  | 1.0  | FOXO1   |
| 27086  | 1.0   | 1.0  | 1.0  | 2.6  | FOXP1   |
| 116113 | 1.0   | 1.0  | 1.0  | 1.0  | FOXP4   |
| 94234  | 1.0   | 1.0  | 1.0  | 1.0  | FOXQ1   |
| 283150 | 2.0   | 1.0  | 1.0  | 1.0  | FOXR1   |

|        |       |      |      |      |           |
|--------|-------|------|------|------|-----------|
| 80020  | -3.9  | 1.0  | 1.0  | 1.0  | FOXRED2   |
| 2307   | 1.5   | 1.0  | 1.0  | 1.0  | FOXS1     |
| 2356   | 1.0   | 1.0  | 2.5  | 1.0  | FPGS      |
| 2357   | 1.5   | 1.0  | 1.0  | 1.0  | FPR1      |
| 2358   | 1.0   | 1.0  | 3.5  | 1.0  | FPR2      |
| 118924 | 1.0   | -3.8 | 1.0  | -3.5 | FRA10AC1  |
| 10023  | 1.0   | 1.0  | -4.9 | 1.0  | FRAT1     |
| 158326 | 1.0   | 1.0  | 5.7  | 1.0  | FREM1     |
| 448831 | 1.6   | 4.8  | 1.0  | 1.0  | FRG2      |
| 257019 | 1.0   | 1.0  | 1.0  | 1.0  | FRMD3     |
| 9758   | 1.0   | 1.0  | -6.1 | 1.0  | FRMPD4    |
| 10129  | 1.0   | 1.0  | -7.0 | 1.0  | FRY       |
| 6624   | 1.0   | 1.0  | 1.0  | 1.0  | FSCN1     |
| 25794  | 1.0   | 1.0  | 1.0  | 1.0  | FSCN2     |
| 29999  | 1.0   | 3.4  | 1.0  | 1.0  | FSCN3     |
| 2492   | 1.0   | 1.0  | 1.0  | 1.0  | FSHR      |
| 161835 | 1.0   | 1.0  | -8.4 | -3.5 | FSIP1     |
| 10272  | 1.0   | 1.0  | 5.4  | 1.0  | FSTL3     |
| 23105  | 1.0   | -2.7 | 1.0  | 1.0  | FSTL4     |
| 10841  | 1.9   | 1.0  | 1.0  | 1.0  | FTCD      |
| 2512   | -1.8  | -2.0 | 1.0  | 1.0  | FTL       |
| 94033  | 1.0   | 1.0  | 1.0  | 1.0  | FTMT      |
| 23070  | 1.0   | 2.8  | 4.3  | 3.0  | FTSJD2    |
| 8880   | -2.3  | -2.1 | 1.0  | 1.0  | FUBP1     |
| 2519   | 1.0   | 1.0  | 1.0  | 1.0  | FUCA2     |
| 84750  | 1.0   | 1.0  | 1.0  | 1.0  | FUT10     |
| 170384 | -1.5  | 1.0  | 1.0  | -6.3 | FUT11     |
| 2527   | -1.6  | 1.0  | 1.0  | 1.0  | FUT5      |
| 2528   | 1.0   | 1.0  | 1.0  | 1.0  | FUT6      |
| 2529   | 1.0   | 1.0  | 1.0  | 1.0  | FUT7      |
| 10690  | -6.1  | 1.0  | 1.0  | 1.0  | FUT9      |
| 2395   | 1.0   | 1.0  | 2.7  | 1.8  | FXN       |
| 9513   | 8.9   | 1.0  | 1.0  | 1.0  | FXR2      |
| 5349   | 1.0   | 1.0  | 5.2  | 1.0  | FXYD3     |
| 53828  | 1.0   | 3.0  | 1.0  | 1.0  | FXYD4     |
| 53827  | -17.7 | -3.7 | -6.5 | -5.0 | FXYD5     |
| 53822  | 1.0   | 1.0  | 1.0  | 2.2  | FXYD7     |
| 2533   | 1.0   | 1.0  | -5.9 | 1.0  | FYB       |
| 2534   | 1.0   | 2.6  | 2.7  | 2.7  | FYN       |
| 8322   | 1.0   | 1.0  | 1.0  | 1.0  | FZD4      |
| 10146  | 1.0   | -2.5 | 2.5  | 1.0  | G3BP1     |
| 9908   | 1.0   | 2.3  | 2.3  | 1.0  | G3BP2     |
| 2548   | 1.0   | 1.0  | 1.0  | 1.0  | GAA       |
| 9846   | 3.0   | 1.0  | 6.7  | 1.0  | GAB2      |
| 11345  | 1.0   | 1.0  | 1.0  | 1.0  | GABARAPL2 |
| 2550   | 1.0   | 1.0  | 1.0  | 1.0  | GABBR1    |
| 2553   | 1.0   | 1.0  | 1.0  | 1.0  | GABPB1    |
| 126626 | 1.0   | 1.0  | 1.0  | -4.5 | GABPB2    |

|        |      |      |      |       |            |
|--------|------|------|------|-------|------------|
| 2554   | -1.6 | -5.2 | 1.0  | 1.0   | GABRA1     |
| 2556   | 1.0  | 1.0  | 1.0  | 1.0   | GABRA3     |
| 2558   | -3.5 | 8.4  | 8.6  | 1.0   | GABRA5     |
| 2560   | 1.0  | 1.0  | 1.0  | 1.0   | GABRB1     |
| 2562   | -5.0 | 1.0  | 5.2  | 1.0   | GABRB3     |
| 2563   | 1.0  | 1.0  | 1.0  | 1.0   | GABRD      |
| 2564   | 1.0  | 1.8  | 1.0  | 1.0   | GABRE      |
| 2565   | 1.0  | 1.0  | 1.0  | 1.0   | GABRG1     |
| 55879  | 1.0  | 1.0  | 2.4  | 2.7   | GABRQ      |
| 2569   | 1.0  | 1.0  | 1.0  | 2.2   | GABRR1     |
| 2571   | 1.0  | 1.0  | 4.2  | 3.3   | GAD1       |
| 2572   | -1.8 | 1.0  | 1.0  | 1.0   | GAD2       |
| 10912  | 1.0  | 1.6  | 1.0  | 1.0   | GADD45G    |
| 90480  | 1.0  | 1.0  | 2.0  | 1.0   | GADD45GIP1 |
| 2543   | 1.0  | 1.0  | 1.0  | 1.0   | GAGE1      |
| 2579   | 1.0  | 1.0  | 1.0  | 1.0   | GAGE7      |
| 2580   | 1.0  | 1.0  | 1.0  | 1.0   | GAK        |
| 51083  | 1.0  | 1.0  | 1.0  | 1.0   | GAL        |
| 2581   | 1.0  | 1.0  | 1.0  | 1.0   | GALC       |
| 130589 | 1.0  | 1.0  | 1.0  | 1.0   | GALM       |
| 2588   | 1.0  | 1.0  | 1.0  | 1.0   | GALNS      |
| 2590   | 1.0  | 1.0  | 1.0  | 1.0   | GALNT2     |
| 11227  | 1.0  | 1.0  | 1.0  | 1.0   | GALNT5     |
| 51809  | -3.6 | 1.0  | 1.0  | 1.0   | GALNT7     |
| 57452  | 1.0  | 1.0  | 1.0  | 1.6   | GALNTL1    |
| 374378 | 1.0  | 2.3  | 1.0  | 1.0   | GALNTL4    |
| 8139   | 1.0  | 6.6  | 1.0  | 5.9   | GAN        |
| 2596   | 1.0  | 1.0  | 1.0  | 1.0   | GAP43      |
| 26130  | 1.0  | 1.0  | 3.3  | 3.4   | GAPVD1     |
| 2620   | 1.0  | 1.0  | 1.0  | 1.0   | GAS2       |
| 246176 | 2.3  | 6.4  | 5.0  | 5.1   | GAS2L2     |
| 8522   | 1.0  | 1.0  | 4.5  | 1.0   | GAS7       |
| 2626   | -2.5 | 2.7  | 1.0  | -10.7 | GATA4      |
| 352954 | 3.3  | 1.0  | -2.2 | -5.4  | GATS       |
| 57733  | 1.0  | 1.0  | 1.0  | 1.0   | GBA3       |
| 2631   | 1.0  | 1.0  | 1.0  | 1.0   | GBAS       |
| 2632   | 1.0  | 1.0  | 1.0  | 1.0   | GBE1       |
| 26301  | -5.2 | 1.0  | 1.0  | 1.0   | GBGT1      |
| 115362 | 1.0  | 1.0  | 1.0  | 1.0   | GBP5       |
| 163351 | 1.0  | 1.0  | 1.0  | 1.0   | GBP6       |
| 9648   | 1.0  | -5.7 | -8.0 | -7.1  | GCC2       |
| 94104  | -1.6 | 2.9  | 1.0  | 1.0   | GCFC1      |
| 2641   | 1.0  | 1.0  | -6.9 | 1.0   | GCG        |
| 2646   | 2.7  | 1.0  | 1.0  | 1.0   | GCKR       |
| 2650   | 1.0  | 1.0  | -7.3 | 1.0   | GCNT1      |
| 9245   | 1.0  | 1.0  | -7.0 | 1.0   | GCNT3      |
| 51301  | 1.0  | 1.0  | 1.0  | 1.0   | GCNT4      |
| 9615   | 1.0  | 1.0  | 3.8  | 1.0   | GDA        |

|        |       |      |      |      |          |
|--------|-------|------|------|------|----------|
| 54332  | 1.0   | 1.0  | -6.1 | 1.0  | GDAP1    |
| 78997  | 1.0   | 1.0  | 1.0  | 1.0  | GDAP1L1  |
| 2657   | 3.4   | 7.3  | 4.5  | 1.0  | GDF1     |
| 2662   | 1.0   | 1.0  | 1.0  | 1.0  | GDF10    |
| 2658   | 1.0   | 1.0  | 1.0  | 1.0  | GDF2     |
| 392255 | 1.7   | -2.8 | 1.0  | 1.0  | GDF6     |
| 2665   | 1.0   | 1.0  | 1.0  | 1.0  | GDI2     |
| 2668   | 1.0   | 1.0  | 1.0  | 2.1  | GDNF     |
| 220032 | 1.0   | 1.0  | 1.0  | 1.0  | GDPD4    |
| 2669   | 1.0   | 1.0  | 1.0  | 1.0  | GEM      |
| 25929  | 1.0   | 1.0  | 1.0  | 1.0  | GEMIN5   |
| 79833  | 1.0   | 3.6  | 1.0  | 1.0  | GEMIN6   |
| 492303 | -5.8  | 1.0  | 1.0  | 1.0  | GEMIN8P4 |
| 348654 | 1.0   | -7.5 | -4.7 | -8.1 | GEN1     |
| 2671   | -3.3  | 1.0  | 1.0  | 1.0  | GFER     |
| 2672   | 1.0   | 1.0  | 1.0  | 1.0  | GFI1     |
| 8328   | 1.6   | 1.0  | 1.0  | 2.5  | GFI1B    |
| 85476  | 1.0   | 2.5  | 2.8  | 1.0  | GFM1     |
| 84340  | 1.0   | 1.0  | 1.0  | 1.0  | GFM2     |
| 81577  | 1.0   | 1.0  | 2.3  | 1.0  | GFOD2    |
| 2675   | 1.0   | 1.0  | 1.0  | -2.7 | GFRA2    |
| 26088  | 1.0   | 3.6  | 3.7  | 3.1  | GGA1     |
| 79017  | 1.0   | 1.0  | 1.0  | 1.0  | GGCT     |
| 199720 | -7.1  | -3.6 | 1.0  | 1.0  | GGN      |
| 79893  | 1.0   | 5.1  | 8.3  | 5.9  | GGNBP2   |
| 2679   | 4.3   | 1.0  | 1.0  | 1.0  | GGT3P    |
| 124975 | 3.4   | 1.0  | 1.0  | 1.0  | GGT6     |
| 2686   | 9.6   | 1.0  | 1.0  | 1.0  | GGT7     |
| 2681   | 1.0   | 1.0  | 3.1  | 1.0  | GGTA1P   |
| 91227  | 1.0   | 1.0  | 1.0  | 1.0  | GGTLC2   |
| 84514  | -12.2 | 1.0  | 1.0  | 1.0  | GHDC     |
| 2691   | 1.0   | 1.0  | 1.0  | 1.0  | GHRH     |
| 2692   | 1.9   | 1.0  | 1.0  | 1.0  | GHRHR    |
| 51738  | 1.0   | 1.0  | 2.2  | 2.6  | GHRL     |
| 84657  | 1.0   | 1.0  | 1.0  | 1.0  | GHRLOS2  |
| 64599  | 1.8   | 1.0  | 1.0  | 1.0  | GIGYF1   |
| 26058  | -1.7  | -3.6 | -3.6 | -3.7 | GIGYF2   |
| 54826  | 1.0   | 1.0  | 1.0  | 1.0  | GIN1     |
| 51659  | 1.0   | 1.0  | 1.0  | 1.0  | GINS2    |
| 84296  | -1.7  | 1.0  | 1.0  | 1.0  | GINS4    |
| 2695   | 1.0   | 1.0  | 1.0  | 1.0  | GIP      |
| 54810  | 1.0   | -8.1 | -7.9 | -5.9 | GIPC2    |
| 28964  | 1.0   | 1.0  | 1.0  | 1.0  | GIT1     |
| 9815   | 1.0   | 1.0  | 4.8  | 1.0  | GIT2     |
| 84694  | 1.0   | -5.3 | -6.3 | -8.3 | GJA10    |
| 349149 | 1.0   | 2.6  | 1.0  | 1.8  | GJC3     |
| 2710   | 1.0   | 1.0  | 1.0  | 1.0  | GK       |
| 56287  | 1.0   | 1.0  | 1.0  | 1.0  | GKN1     |

|        |      |      |      |      |           |
|--------|------|------|------|------|-----------|
| 200504 | 1.8  | 1.0  | 1.0  | 1.0  | GKN2      |
| 2717   | 1.0  | 1.0  | 1.0  | 1.0  | GLA       |
| 79411  | 1.0  | 1.0  | 1.0  | 1.0  | GLB1L     |
| 89944  | 1.0  | 1.0  | 1.0  | 1.0  | GLB1L2    |
| 112937 | 1.0  | 1.0  | 1.0  | 1.0  | GLB1L3    |
| 2731   | 1.0  | 4.4  | 4.8  | 4.3  | GLDC      |
| 2736   | 1.0  | 1.0  | 2.6  | 1.0  | GLI2      |
| 2738   | 1.0  | 1.0  | 1.0  | 1.0  | GLI4      |
| 152007 | 1.0  | 1.0  | 1.0  | 1.0  | GLIPR2    |
| 169792 | -1.9 | 1.0  | 1.0  | 1.0  | GLIS3     |
| 84850  | 1.0  | 1.0  | 1.0  | 1.0  | GLIS3-AS1 |
| 11146  | 1.0  | 1.0  | 1.0  | 1.0  | GLMN      |
| 392465 | 1.0  | 1.0  | 1.0  | 1.0  | GLOD5     |
| 9340   | 1.0  | 1.9  | 2.2  | 1.0  | GLP2R     |
| 2741   | 1.6  | 1.0  | 1.0  | 1.0  | GLRA1     |
| 51022  | 1.0  | 1.0  | 1.0  | 1.0  | GLRX2     |
| 51218  | -4.3 | -2.5 | -2.3 | 1.0  | GLRX5     |
| 144423 | 1.0  | 1.0  | -3.9 | 1.0  | GLT1D1    |
| 79709  | 1.0  | 1.0  | 1.0  | 1.0  | GLT25D1   |
| 23127  | 1.0  | 1.0  | 1.0  | 1.0  | GLT25D2   |
| 83468  | 1.0  | 1.0  | 1.0  | 1.0  | GLT8D2    |
| 80772  | 1.0  | 1.0  | 1.0  | 1.0  | GLTPD1    |
| 29998  | 1.7  | 1.0  | 1.0  | 1.0  | GLTSCR1   |
| 10249  | 1.0  | -1.7 | -4.8 | -2.9 | GLYAT     |
| 644076 | 2.4  | -3.3 | -2.0 | -2.6 | GLYCAM1   |
| 2762   | 1.0  | 1.0  | 1.0  | 1.0  | GMDS      |
| 51291  | 1.0  | 1.0  | 1.0  | 1.0  | GMIP      |
| 2765   | 1.0  | 3.6  | 3.0  | 1.0  | GML       |
| 29926  | -2.1 | 1.0  | 1.0  | 1.0  | GMPPA     |
| 2766   | 1.0  | -1.9 | -1.7 | 1.0  | GMPR      |
| 8833   | -5.3 | 1.0  | 1.0  | 1.0  | GMPS      |
| 10672  | 1.0  | 1.0  | 1.0  | 1.0  | GNA13     |
| 2770   | 1.0  | 1.0  | 1.0  | 1.0  | GNAI1     |
| 2774   | -4.2 | -3.4 | 1.0  | 1.0  | GNAL      |
| 2778   | 1.0  | 1.0  | 1.0  | 1.0  | GNAS      |
| 2782   | 1.0  | 1.0  | 1.0  | -3.3 | GNB1      |
| 2783   | 1.0  | 1.0  | 1.0  | 1.0  | GNB2      |
| 10399  | 1.0  | 1.0  | 1.0  | 1.0  | GNB2L1    |
| 2784   | 1.0  | 2.6  | 1.0  | 1.0  | GNB3      |
| 2790   | 3.3  | 1.0  | 1.0  | 1.0  | GNG10     |
| 2791   | 1.0  | 1.0  | 1.0  | 1.0  | GNG11     |
| 54331  | 1.0  | 1.0  | 2.3  | 1.0  | GNG2      |
| 2786   | 1.0  | 1.0  | 1.0  | 1.6  | GNG4      |
| 2787   | 1.0  | 1.0  | 1.0  | 1.0  | GNG5      |
| 2793   | 1.0  | 1.0  | -7.5 | 1.0  | GNGT2     |
| 54552  | 1.0  | 1.0  | 1.0  | -2.6 | GNL3L     |
| 2796   | 1.0  | 1.0  | 1.0  | 1.0  | GNRH1     |
| 2797   | 1.0  | 1.0  | 3.5  | 1.0  | GNRH2     |

|        |      |      |      |      |          |
|--------|------|------|------|------|----------|
| 2798   | 1.0  | 1.0  | 1.0  | 1.0  | GNRHR    |
| 2801   | 1.0  | 1.0  | 1.0  | -4.1 | GOLGA2   |
| 55592  | 1.0  | 1.0  | -3.9 | 1.0  | GOLGA2P5 |
| 9950   | 1.0  | 1.0  | 1.0  | 1.0  | GOLGA5   |
| 342096 | -2.3 | 1.0  | 1.0  | 1.0  | GOLGA6A  |
| 727832 | 1.0  | 1.0  | 1.0  | 1.0  | GOLGA6L6 |
| 51125  | -1.7 | 1.0  | 1.0  | 1.0  | GOLGA7   |
| 390535 | 1.0  | -4.7 | 1.0  | 1.0  | GOLGA8E  |
| 283796 | 1.0  | 1.0  | -2.1 | 1.0  | GOLGA8IP |
| 127845 | 1.0  | 1.0  | 1.0  | 1.0  | GOLT1A   |
| 54856  | 5.4  | 1.0  | 1.0  | 1.0  | GON4L    |
| 57120  | 1.0  | 1.0  | -5.6 | 1.0  | GOPC     |
| 92344  | -2.3 | -3.2 | 1.0  | 1.0  | GORAB    |
| 64689  | 1.7  | -2.8 | -4.1 | 1.0  | GORASP1  |
| 9570   | 1.0  | 1.0  | 1.0  | 1.0  | GOSR2    |
| 2811   | 1.0  | 1.0  | 1.0  | 1.0  | GP1BA    |
| 2813   | -6.9 | 1.0  | 1.0  | 1.0  | GP2      |
| 2815   | 1.0  | -5.6 | 1.0  | 1.0  | GP9      |
| 150763 | 1.0  | 1.0  | 1.0  | 1.0  | GPAT2    |
| 63906  | 1.0  | 1.0  | 4.5  | 1.0  | GPATCH3  |
| 54865  | 1.0  | 1.0  | 1.0  | 1.0  | GPATCH4  |
| 65056  | 1.0  | 3.3  | 1.0  | 1.0  | GPBP1    |
| 2262   | -5.4 | -2.8 | -3.0 | 1.0  | GPC5     |
| 2819   | 2.6  | 1.0  | 1.0  | -4.2 | GPD1     |
| 2820   | 1.0  | 1.0  | 1.0  | -4.1 | GPD2     |
| 2852   | 1.0  | 1.0  | 1.0  | -2.5 | GPER     |
| 27238  | 1.0  | 1.0  | 2.4  | 1.0  | GPKOW    |
| 2823   | 7.5  | 1.0  | 9.1  | 1.0  | GPM6A    |
| 2824   | 1.0  | 4.9  | 1.0  | 1.0  | GPM6B    |
| 11321  | 1.0  | 1.0  | 1.0  | 1.0  | GPN1     |
| 221188 | -5.7 | 1.0  | -2.5 | 1.0  | GPR114   |
| 221393 | 3.3  | 1.0  | 1.0  | 1.0  | GPR115   |
| 84435  | 1.0  | 1.0  | 1.0  | 1.0  | GPR123   |
| 64582  | 9.1  | 1.0  | 1.0  | 1.0  | GPR135   |
| 4935   | 1.0  | 1.0  | -2.5 | 1.0  | GPR143   |
| 115330 | 1.0  | 1.0  | 1.0  | 1.0  | GPR146   |
| 344758 | 1.0  | -4.2 | 1.0  | -6.1 | GPR149   |
| 387509 | 1.7  | 1.0  | -7.2 | 1.0  | GPR153   |
| 151556 | 1.0  | 1.0  | -2.6 | -2.5 | GPR155   |
| 165829 | 1.0  | 1.0  | 1.0  | 1.0  | GPR156   |
| 27239  | 1.0  | 1.0  | 1.0  | 1.0  | GPR162   |
| 2840   | 1.0  | -4.0 | 1.0  | 2.8  | GPR17    |
| 29909  | 1.0  | 1.0  | 1.0  | 1.0  | GPR171   |
| 79581  | 1.0  | 1.0  | -2.6 | 1.0  | GPR172A  |
| 84636  | 1.0  | 1.0  | 2.5  | 1.0  | GPR174   |
| 11245  | 3.3  | 1.0  | 1.0  | 1.0  | GPR176   |
| 160897 | 1.0  | 3.1  | 2.8  | 5.1  | GPR180   |
| 1880   | 1.0  | 1.0  | 1.0  | 1.0  | GPR183   |

|        |      |      |      |      |         |
|--------|------|------|------|------|---------|
| 2849   | 1.0  | 1.0  | 1.0  | 1.0  | GPR26   |
| 2827   | 1.0  | 1.0  | 2.0  | 1.0  | GPR3    |
| 2854   | 1.0  | 1.0  | 1.0  | 1.0  | GPR32   |
| 2857   | 1.0  | 1.0  | 1.0  | -2.2 | GPR34   |
| 2859   | 1.6  | -2.5 | 1.0  | 1.0  | GPR35   |
| 2863   | 1.0  | 1.0  | 1.0  | 1.0  | GPR39   |
| 9290   | 1.0  | 1.0  | 1.0  | 2.0  | GPR55   |
| 2830   | 1.0  | 1.0  | -2.2 | 1.0  | GPR6    |
| 8477   | 1.0  | 1.0  | 1.0  | 1.0  | GPR65   |
| 10936  | 1.0  | 1.0  | 1.0  | 1.0  | GPR75   |
| 27202  | 1.5  | 1.0  | 1.0  | 1.0  | GPR77   |
| 27201  | 1.0  | 1.0  | 1.0  | 1.0  | GPR78   |
| 27197  | 1.0  | 1.0  | 1.0  | 1.0  | GPR82   |
| 53831  | 1.0  | 1.0  | 1.0  | 1.0  | GPR84   |
| 53836  | 1.0  | -3.4 | -5.4 | -3.4 | GPR87   |
| 54112  | 1.0  | 1.0  | 1.0  | 1.0  | GPR88   |
| 51463  | 1.0  | 1.0  | -7.0 | -7.6 | GPR89B  |
| 84059  | 1.0  | 1.0  | 1.0  | 1.0  | GPR98   |
| 9052   | 1.0  | 1.0  | 1.0  | 1.0  | GPRC5A  |
| 55890  | 1.0  | 1.0  | 3.2  | 1.0  | GPRC5C  |
| 285513 | 1.0  | 1.0  | 1.0  | 1.0  | GPRIN3  |
| 2874   | 1.0  | 1.0  | 2.5  | 2.5  | GPS2    |
| 26086  | 1.0  | 3.6  | 3.1  | 6.0  | GPSM1   |
| 2878   | 1.0  | 3.4  | 3.7  | 2.5  | GPX3    |
| 2880   | 1.0  | 1.0  | 1.0  | 1.0  | GPX5    |
| 257202 | 1.0  | 1.0  | 1.0  | 1.0  | GPX6    |
| 2882   | -4.4 | 1.0  | 1.0  | 1.0  | GPX7    |
| 57476  | 1.0  | 1.0  | 1.0  | 1.0  | GRAMD1B |
| 65983  | 1.0  | 2.3  | 1.0  | 3.0  | GRAMD3  |
| 10750  | 4.4  | -3.4 | -3.4 | 2.9  | GRAP    |
| 400581 | 1.0  | 1.0  | 3.6  | 1.0  | GRAPL   |
| 2887   | 1.0  | -2.2 | 1.0  | -2.6 | GRB10   |
| 2885   | 1.5  | 1.0  | 5.2  | 1.0  | GRB2    |
| 80000  | 1.0  | 1.0  | -3.2 | 1.0  | GREB1L  |
| 29841  | -1.9 | 1.0  | 1.0  | 1.0  | GRHL1   |
| 79977  | 1.0  | 1.0  | 1.0  | 1.0  | GRHL2   |
| 57822  | 3.8  | 3.5  | 1.0  | 1.0  | GRHL3   |
| 2890   | 1.0  | 1.0  | 1.0  | 1.0  | GRIA1   |
| 2894   | 1.0  | 1.0  | 2.8  | 1.0  | GRID1   |
| 2898   | -6.3 | 1.0  | 1.0  | 1.0  | GRIK2   |
| 2902   | 1.0  | 1.0  | 1.0  | 1.0  | GRIN1   |
| 2903   | 1.0  | -3.9 | 1.0  | 1.0  | GRIN2A  |
| 116443 | 1.0  | 1.0  | 1.0  | 1.0  | GRIN3A  |
| 23426  | 1.0  | -2.8 | -3.1 | -3.1 | GRIP1   |
| 80852  | 1.0  | -7.3 | -7.4 | -8.4 | GRIP2   |
| 56850  | 1.0  | 1.0  | -5.4 | 1.0  | GRIPAP1 |
| 131890 | 1.0  | 1.0  | 5.9  | 1.0  | GRK7    |
| 2911   | 1.0  | 1.0  | 1.0  | 1.0  | GRM1    |

|        |       |      |       |      |           |
|--------|-------|------|-------|------|-----------|
| 2913   | 1.0   | 1.0  | 5.3   | 1.0  | GRM3      |
| 2914   | 2.1   | 1.0  | 1.0   | 1.0  | GRM4      |
| 2915   | 1.0   | 1.0  | 1.0   | 1.0  | GRM5      |
| 2917   | 1.0   | 1.0  | 1.0   | 1.0  | GRM7      |
| 2918   | 1.9   | 1.0  | 1.0   | 1.0  | GRM8      |
| 2922   | 1.0   | 1.0  | 2.3   | 2.3  | GRP       |
| 2925   | 1.0   | 1.0  | 1.0   | 1.0  | GRPR      |
| 56169  | 1.0   | 1.0  | -2.7  | 1.0  | GSDMC     |
| 79792  | 1.0   | 1.0  | 1.0   | 1.0  | GSDMD     |
| 83445  | 1.0   | 1.0  | 1.0   | 1.0  | GSG1      |
| 23708  | 1.0   | 2.0  | 4.8   | 1.0  | GSPT2     |
| 2936   | 1.0   | 1.0  | -1.7  | 1.0  | GSR       |
| 2941   | 1.0   | 3.8  | 3.3   | 3.9  | GSTA4     |
| 79807  | 1.0   | -3.1 | 1.0   | 1.0  | GSTCD     |
| 2944   | 1.0   | 1.0  | 2.2   | 1.0  | GSTM1     |
| 2952   | 1.0   | 1.0  | 1.0   | 1.0  | GSTT1     |
| 2953   | -17.3 | 1.0  | 1.0   | 1.0  | GSTT2     |
| 170825 | 1.0   | 1.0  | 1.0   | 1.0  | GSX2      |
| 79712  | 1.0   | 1.0  | 1.0   | 1.0  | GTDC1     |
| 2958   | -3.3  | 1.0  | 1.0   | -3.5 | GTF2A2    |
| 2965   | 1.0   | 1.0  | 1.0   | -5.2 | GTF2H1    |
| 730394 | 2.2   | -2.6 | 1.0   | 1.0  | GTF2H2D   |
| 9569   | 1.0   | 2.5  | 1.0   | 1.0  | GTF2IRD1  |
| 389524 | 1.0   | -4.6 | 1.0   | 1.0  | GTF2IRD2B |
| 2971   | 1.0   | 1.0  | 1.0   | 1.0  | GTF3A     |
| 2975   | 1.0   | 1.0  | 1.0   | 2.2  | GTF3C1    |
| 2976   | 1.0   | 1.0  | 1.0   | 1.0  | GTF3C2    |
| 9330   | 1.0   | 1.0  | 1.0   | 1.0  | GTF3C3    |
| 9329   | 4.6   | 1.0  | -3.2  | 1.0  | GTF3C4    |
| 9328   | 1.0   | 1.0  | 1.0   | -3.6 | GTF3C5    |
| 85865  | 1.0   | -6.5 | -1.8  | 1.0  | GTPBP10   |
| 54676  | 1.0   | 1.0  | 1.0   | 1.0  | GTPBP2    |
| 26164  | 2.9   | 1.0  | 1.0   | 1.0  | GTPBP5    |
| 29083  | 1.0   | 1.0  | 1.0   | 1.0  | GTPBP8    |
| 51512  | 1.0   | 1.0  | -5.0  | -3.2 | GTSE1     |
| 121355 | 1.0   | 1.0  | 1.0   | 1.0  | GTSF1     |
| 2978   | 1.0   | 1.0  | -4.4  | 1.0  | GUCA1A    |
| 9626   | 1.0   | 1.0  | 1.0   | -6.3 | GUCA1C    |
| 2980   | 1.0   | 1.0  | 1.0   | 1.0  | GUCA2A    |
| 2982   | 1.0   | 1.0  | -3.4  | 1.0  | GUCY1A3   |
| 2974   | 1.0   | 1.0  | 1.0   | 1.0  | GUCY1B2   |
| 2983   | 1.0   | -8.0 | -10.0 | 1.0  | GUCY1B3   |
| 2984   | 1.0   | 1.0  | 1.0   | -3.6 | GUCY2C    |
| 3000   | 1.0   | 1.0  | 1.0   | 5.7  | GUCY2D    |
| 2987   | 1.0   | 1.0  | 2.7   | 1.7  | GUK1      |
| 51454  | 1.0   | -6.0 | -8.3  | 1.0  | GULP1     |
| 728411 | 1.0   | 1.0  | 1.0   | 1.0  | GUSBP1    |
| 283464 | 1.0   | 1.0  | 1.0   | 1.0  | GXYLT1    |



|        |       |      |      |      |         |
|--------|-------|------|------|------|---------|
| 727936 | 1.0   | 1.0  | -6.2 | 1.0  | GXYLT2  |
| 2992   | 1.0   | 1.0  | -6.3 | 1.0  | GYG1    |
| 8908   | 1.0   | 1.0  | -3.2 | 1.0  | GYG2    |
| 2994   | 1.0   | 1.0  | 2.2  | 1.0  | GYPB    |
| 2996   | 1.0   | 1.0  | 4.8  | 5.4  | GYPE    |
| 3001   | 1.0   | 1.0  | 1.0  | 1.0  | GZMA    |
| 3002   | 1.0   | -3.0 | -2.9 | -3.0 | GZMB    |
| 2999   | 1.0   | 2.5  | 1.0  | 1.0  | GZMH    |
| 283120 | 1.0   | 1.0  | 1.0  | 1.0  | H19     |
| 341567 | 1.0   | 1.0  | 1.0  | 1.0  | H1FNT   |
| 132243 | 13.8  | 1.0  | 1.0  | 1.0  | H1FOO   |
| 8971   | 1.7   | 1.0  | 1.0  | -2.5 | H1FX    |
| 55766  | 2.1   | -5.0 | -5.0 | -8.3 | H2AFJ   |
| 767811 | 1.0   | -4.4 | 1.0  | 1.0  | H2BFXP  |
| 23498  | 1.0   | 1.0  | 5.6  | 1.0  | HAAO    |
| 57531  | 1.0   | 3.1  | 3.1  | 5.7  | HACE1   |
| 9421   | 1.0   | 4.7  | 6.3  | 1.0  | HAND1   |
| 54363  | 1.0   | -2.8 | 1.0  | 1.0  | HAO1    |
| 1404   | 1.0   | 1.0  | 2.3  | 1.0  | HAPLN1  |
| 60484  | 1.0   | -3.2 | 1.0  | 1.0  | HAPLN2  |
| 145864 | 1.0   | 1.0  | 1.0  | 3.9  | HAPLN3  |
| 3036   | 1.0   | 1.0  | 1.0  | 1.0  | HAS1    |
| 115106 | 1.0   | 1.0  | 5.1  | 1.0  | HAUS1   |
| 55142  | 1.0   | 1.0  | 1.0  | 1.0  | HAUS2   |
| 3043   | 1.0   | 1.0  | 1.0  | 2.4  | HBB     |
| 3044   | 1.0   | 2.3  | 1.0  | 1.0  | HBBP1   |
| 1839   | 1.0   | 1.0  | 1.0  | 1.0  | HBEGF   |
| 3047   | 1.0   | 2.1  | 2.3  | 1.0  | HBG1    |
| 26959  | -1.9  | 2.7  | 2.6  | 3.0  | HBP1    |
| 10767  | -1.6  | 1.0  | 1.0  | 1.0  | HBS1L   |
| 3050   | 1.0   | -4.1 | 1.0  | 1.0  | HBZ     |
| 8843   | 1.0   | 4.4  | 3.5  | 1.0  | HCAR3   |
| 3052   | -2.1  | 4.3  | 4.4  | 1.0  | HCCS    |
| 54985  | 1.0   | -3.2 | 1.0  | 1.0  | HCFC1R1 |
| 29915  | 1.0   | -4.2 | 6.0  | 1.0  | HCFC2   |
| 285834 | 1.0   | -8.4 | 1.0  | -8.3 | HCG22   |
| 80868  | -13.3 | 1.0  | 1.0  | 2.6  | HCG4B   |
| 610    | 1.0   | -2.1 | 1.0  | 1.0  | HCN2    |
| 57657  | 1.0   | 2.8  | 3.9  | 2.4  | HCN3    |
| 10866  | 1.0   | 4.2  | 3.3  | 1.0  | HCP5    |
| 10870  | 1.0   | 1.0  | 1.0  | -2.2 | HCST    |
| 83933  | 1.0   | 1.0  | 1.0  | 1.0  | HDAC10  |
| 3066   | 1.0   | -2.5 | -2.5 | -2.4 | HDAC2   |
| 9759   | 1.0   | 4.6  | 2.1  | 1.0  | HDAC4   |
| 10013  | 1.0   | 1.0  | 1.0  | 1.0  | HDAC6   |
| 51564  | 1.0   | 1.0  | -4.3 | 1.0  | HDAC7   |
| 55869  | 1.0   | -2.6 | -2.5 | -2.4 | HDAC8   |
| 9734   | 1.0   | 1.0  | 1.0  | 1.0  | HDAC9   |

|        |       |      |      |      |          |
|--------|-------|------|------|------|----------|
| 51020  | 1.0   | 1.0  | -5.7 | -2.6 | HDDC2    |
| 3068   | 1.0   | 1.0  | 1.0  | 1.0  | HDGF     |
| 84717  | 1.0   | 1.0  | 1.0  | 4.1  | HDGFRP2  |
| 3069   | -11.9 | 1.0  | -4.0 | 1.0  | HDLBP    |
| 55127  | 1.0   | 1.8  | 1.0  | 1.0  | HEATR1   |
| 54919  | 1.0   | 1.0  | 1.0  | 1.0  | HEATR2   |
| 399671 | 1.0   | 1.0  | 1.0  | 1.0  | HEATR4   |
| 339766 | 1.0   | 1.0  | 1.0  | 4.6  | HEATR7B1 |
| 23593  | -2.0  | 1.0  | 1.0  | -7.2 | HEBP2    |
| 25831  | 1.0   | 1.0  | 1.0  | 1.0  | HECTD1   |
| 143279 | 1.0   | 1.0  | -5.9 | 1.0  | HECTD2   |
| 79654  | 1.0   | 1.0  | 1.0  | 1.0  | HECTD3   |
| 3070   | -1.8  | -2.9 | 1.0  | 1.0  | HELLS    |
| 55363  | 1.0   | 1.0  | 1.0  | -4.8 | HEMGN    |
| 113802 | 1.0   | 2.4  | 1.0  | 1.0  | HENMT1   |
| 220296 | 1.0   | 6.8  | 1.0  | 1.0  | HEPACAM  |
| 253012 | 1.0   | 1.0  | 2.7  | 1.0  | HEPACAM2 |
| 26091  | 1.0   | 1.0  | 1.0  | 1.0  | HERC4    |
| 64224  | 1.5   | 1.0  | 1.0  | 1.0  | HERPUD2  |
| 54626  | 1.0   | 1.0  | 1.0  | 1.0  | HES2     |
| 57801  | 5.9   | 1.0  | 1.0  | 8.1  | HES4     |
| 55502  | 1.0   | -3.2 | -3.3 | -3.3 | HES6     |
| 84667  | 1.0   | 1.0  | -4.7 | -2.4 | HES7     |
| 124790 | 1.0   | 1.0  | 3.0  | 1.0  | HEXIM2   |
| 26508  | 1.0   | 2.4  | 1.0  | 1.0  | HEYL     |
| 3077   | 1.0   | 1.0  | 1.0  | 1.0  | HFE      |
| 148738 | 1.0   | 1.0  | 1.0  | 1.0  | HFE2     |
| 3081   | 1.0   | 1.0  | 1.0  | 1.0  | HGD      |
| 3082   | 1.0   | 1.0  | 1.0  | 1.0  | HGF      |
| 9146   | 1.8   | 1.0  | 1.0  | 1.0  | HGS      |
| 138050 | 2.5   | 4.6  | 1.0  | 1.0  | HGSNAT   |
| 84439  | 1.0   | 1.0  | 1.0  | 1.0  | HHIPL1   |
| 64645  | 19.3  | 1.0  | 2.3  | 1.0  | HIAT1    |
| 26275  | 1.0   | 1.0  | 1.0  | 1.0  | HIBCH    |
| 3090   | 2.0   | 1.0  | 8.3  | 1.0  | HIC1     |
| 55662  | 1.0   | 1.7  | 1.0  | 2.7  | HIF1AN   |
| 64344  | 1.0   | 1.0  | 1.0  | 1.0  | HIF3A    |
| 51751  | 1.0   | 1.0  | 1.0  | 1.0  | HIGD1B   |
| 192286 | 1.0   | 1.0  | 1.0  | 1.0  | HIGD2A   |
| 29923  | 1.0   | 1.0  | 1.0  | 1.0  | HILPDA   |
| 373861 | 1.0   | 1.0  | -3.8 | 1.0  | HILS1    |
| 3092   | -1.5  | 3.9  | 1.0  | 1.0  | HIP1     |
| 9026   | 1.0   | 1.0  | 1.0  | 1.0  | HIP1R    |
| 204851 | 2.6   | 1.0  | -2.4 | 1.0  | HIPK1    |
| 28996  | -6.7  | -2.0 | 1.0  | -2.4 | HIPK2    |
| 147746 | 1.0   | 1.0  | 1.0  | -3.9 | HIPK4    |
| 7290   | 1.0   | 1.0  | 1.9  | 1.0  | HIRA     |
| 8479   | 1.0   | 1.0  | -3.6 | 1.0  | HIRIP3   |

|        |       |      |      |      |            |
|--------|-------|------|------|------|------------|
| 3009   | 1.0   | 1.0  | -6.5 | -3.1 | HIST1H1B   |
| 3008   | 1.0   | 1.0  | 1.0  | 4.6  | HIST1H1E   |
| 8334   | 1.0   | 4.6  | 7.5  | 2.6  | HIST1H2AC  |
| 3012   | 1.0   | 1.0  | 1.0  | 1.0  | HIST1H2AE  |
| 8330   | 1.0   | 1.0  | 1.0  | 2.6  | HIST1H2AK  |
| 8332   | 1.0   | -4.1 | -4.0 | 1.0  | HIST1H2AL  |
| 8347   | 1.0   | 1.0  | 1.0  | 1.0  | HIST1H2BC  |
| 8343   | 1.0   | 1.0  | -1.8 | 1.0  | HIST1H2BF  |
| 8339   | 1.0   | 1.0  | 1.0  | 1.0  | HIST1H2BG  |
| 8341   | 1.0   | 1.0  | -2.5 | 1.0  | HIST1H2BN  |
| 8350   | 1.0   | 1.0  | 1.0  | 5.6  | HIST1H3A   |
| 8351   | 1.0   | 1.0  | 1.0  | 1.0  | HIST1H3D   |
| 8357   | -1.5  | -2.7 | 1.0  | 1.0  | HIST1H3H   |
| 8354   | 1.0   | 1.0  | 1.0  | 1.0  | HIST1H3I   |
| 8356   | 2.0   | -4.5 | 1.0  | 1.0  | HIST1H3J   |
| 8359   | 1.0   | 1.0  | 1.0  | 1.9  | HIST1H4A   |
| 8366   | 1.0   | 1.0  | 1.0  | 1.0  | HIST1H4B   |
| 8361   | -2.0  | -3.0 | -2.8 | 1.0  | HIST1H4F   |
| 8362   | 1.0   | -2.5 | 1.0  | -2.4 | HIST1H4K   |
| 8368   | 1.8   | -6.3 | -6.3 | 1.0  | HIST1H4L   |
| 723790 | 1.0   | 1.0  | 4.7  | 1.0  | HIST2H2AA4 |
| 8338   | 1.0   | -2.9 | 1.0  | -3.6 | HIST2H2AC  |
| 8349   | 1.0   | -3.8 | 1.0  | 1.0  | HIST2H2BE  |
| 92815  | 1.0   | 1.0  | 1.0  | 1.0  | HIST3H2A   |
| 3096   | -37.5 | 1.0  | 5.5  | 1.0  | HIVEP1     |
| 59269  | 1.0   | 1.0  | 1.0  | 1.0  | HIVEP3     |
| 3101   | 1.6   | -5.2 | 1.0  | 1.0  | HK3        |
| 284459 | 1.0   | 1.0  | 1.0  | 1.0  | HKR1       |
| 3105   | 2.1   | 1.0  | 1.0  | 1.0  | HLA-A      |
| 3106   | 1.0   | -3.2 | 1.0  | -5.9 | HLA-B      |
| 3107   | 1.6   | 1.0  | -5.7 | 1.0  | HLA-C      |
| 3111   | 1.0   | 1.0  | 1.0  | 1.0  | HLA-DOA    |
| 3112   | 1.9   | 1.0  | 1.0  | 1.0  | HLA-DOB    |
| 3115   | 1.0   | 4.7  | 1.0  | 1.0  | HLA-DPB1   |
| 3116   | 1.0   | 1.0  | 1.0  | 1.0  | HLA-DPB2   |
| 3119   | 1.0   | 1.0  | 1.0  | 3.4  | HLA-DQB1   |
| 3120   | -7.1  | 1.0  | -1.5 | 1.0  | HLA-DQB2   |
| 3123   | 1.9   | 1.0  | -1.8 | 1.0  | HLA-DRB1   |
| 3127   | -7.9  | 1.0  | 2.7  | 1.6  | HLA-DRB5   |
| 3137   | 1.0   | 2.8  | 3.0  | 2.8  | HLA-J      |
| 3139   | 1.7   | 1.0  | 1.0  | 1.0  | HLA-L      |
| 81502  | 1.0   | 5.4  | 7.0  | 1.0  | HM13       |
| 79618  | 1.0   | 1.0  | 1.0  | 1.0  | HMBOX1     |
| 3145   | 1.0   | -2.6 | 1.0  | 1.0  | HMBS       |
| 10362  | 1.0   | 1.0  | 1.0  | 1.0  | HMG20B     |
| 8091   | 1.0   | 1.0  | 1.0  | 1.0  | HMGA2      |
| 54511  | 1.0   | 1.0  | 1.0  | 1.0  | HMGCLL1    |
| 3156   | 1.0   | 3.3  | 5.8  | 4.4  | HMGCR      |

|        |       |      |      |      |            |
|--------|-------|------|------|------|------------|
| 3157   | 1.0   | 1.0  | 1.0  | 1.0  | HMGCS1     |
| 3158   | 1.0   | 1.0  | 1.0  | 1.0  | HMGCS2     |
| 3150   | 1.0   | 1.0  | 1.0  | -1.5 | HMGN1      |
| 3151   | 1.0   | 1.0  | 2.4  | 1.0  | HMGN2      |
| 9324   | -8.0  | -3.8 | 1.0  | 1.0  | HMGN3      |
| 10042  | 1.0   | 1.0  | 2.8  | 1.0  | HMGXB4     |
| 57824  | -1.6  | 1.0  | 1.0  | 1.0  | HMHB1      |
| 3161   | 1.0   | 1.0  | 1.0  | 2.9  | HMMR       |
| 3162   | 1.0   | 1.0  | 1.0  | -2.1 | HMOX1      |
| 90861  | 1.0   | 1.0  | -5.3 | 1.0  | HN1L       |
| 283460 | 1.0   | 4.5  | 4.5  | 1.0  | HNF1A-AS1  |
| 3174   | 1.0   | 1.0  | 1.0  | 1.0  | HNF4G      |
| 3176   | 1.7   | -3.7 | -5.8 | -6.0 | HNMT       |
| 10949  | 1.0   | 1.0  | 1.0  | 1.0  | HNRNPA0    |
| 3178   | 1.0   | -2.6 | 1.0  | 1.0  | HNRNPA1    |
| 144983 | 1.0   | -3.4 | 1.0  | 1.0  | HNRNPA1L2  |
| 3181   | -2.0  | 1.0  | -3.0 | 1.0  | HNRNPA2B1  |
| 220988 | 1.0   | 1.0  | 1.0  | 1.0  | HNRNPA3    |
| 3183   | 1.0   | -2.5 | -2.4 | -2.4 | HNRNPC     |
| 3188   | 1.0   | 2.6  | 2.5  | 2.4  | HNRNPH2    |
| 3189   | 2.1   | 4.1  | 3.1  | 2.8  | HNRNPH3    |
| 3191   | 1.0   | 1.0  | 4.9  | 1.0  | HNRNPL     |
| 221092 | 1.0   | -3.7 | -3.6 | -4.2 | HNRNPUL2   |
| 9987   | 2.3   | 1.0  | -3.2 | -3.2 | HNRPDL     |
| 112817 | 1.0   | 1.0  | 1.0  | 1.0  | HOGA1      |
| 9456   | 1.0   | 1.0  | 1.0  | 1.0  | HOMER1     |
| 57594  | 1.0   | 1.0  | 1.0  | 1.0  | HOMEZ      |
| 51361  | 1.0   | 1.0  | 1.0  | 1.0  | HOOK1      |
| 84376  | 1.0   | -5.0 | 1.0  | 1.0  | HOOK3      |
| 84072  | 1.0   | 1.0  | 4.1  | 3.2  | HORMAD1    |
| 3198   | 1.0   | -1.6 | -1.6 | 1.0  | HOXA1      |
| 221883 | 1.0   | 1.0  | 1.0  | 1.0  | HOXA11-AS1 |
| 3209   | -2.9  | 1.0  | 1.0  | 1.0  | HOXA13     |
| 3201   | 1.0   | 1.0  | 1.0  | 1.0  | HOXA4      |
| 3212   | 1.0   | 1.0  | 1.0  | -2.8 | HOXB2      |
| 3213   | 1.0   | 1.0  | 1.0  | 1.0  | HOXB3      |
| 3214   | 1.0   | 1.0  | 1.0  | -3.5 | HOXB4      |
| 3215   | -1.9  | 1.0  | 1.0  | 1.0  | HOXB5      |
| 3219   | 1.0   | 1.0  | 3.4  | 2.3  | HOXB9      |
| 3223   | 1.0   | 1.0  | 1.0  | 1.0  | HOXC6      |
| 3231   | 1.0   | 1.0  | 4.1  | 3.8  | HOXD1      |
| 3236   | 1.0   | 1.0  | 1.0  | 1.7  | HOXD10     |
| 3237   | 1.5   | 1.0  | -1.8 | -2.0 | HOXD11     |
| 3238   | 1.0   | 1.0  | 1.0  | 1.0  | HOXD12     |
| 3232   | -10.4 | 7.4  | 5.5  | 1.0  | HOXD3      |
| 3235   | 1.9   | 4.5  | 1.0  | 1.0  | HOXD9      |
| 51440  | 1.0   | 1.0  | -3.1 | 1.0  | HPCAL4     |
| 84842  | 1.0   | 1.0  | 1.0  | 1.0  | HPDL       |

|        |      |      |      |      |           |
|--------|------|------|------|------|-----------|
| 27306  | 3.2  | 1.0  | 1.0  | 1.0  | HPGDS     |
| 3250   | 1.0  | 1.0  | 2.4  | 1.0  | HPR       |
| 11234  | 1.0  | 1.0  | 1.0  | -2.8 | HPS5      |
| 79803  | 1.0  | 1.0  | 1.0  | 1.0  | HPS6      |
| 10855  | 1.0  | 1.0  | 1.0  | 1.0  | HPSE      |
| 60495  | 1.0  | 1.0  | 2.3  | 1.0  | HPSE2     |
| 652764 | 1.0  | 1.0  | 2.9  | 1.0  | HPX-2     |
| 55806  | 1.0  | 1.0  | 1.0  | 1.0  | HR        |
| 117245 | -4.5 | 1.0  | 1.0  | 1.0  | HRASLS5   |
| 3270   | 1.0  | 1.0  | 2.8  | 1.0  | HRC       |
| 3273   | 1.0  | 1.0  | 2.2  | 1.0  | HRG       |
| 11255  | -1.9 | 1.0  | 1.0  | 1.0  | HRH3      |
| 8739   | 1.0  | 1.0  | 1.0  | 1.0  | HRK       |
| 9953   | 1.0  | 1.0  | 2.7  | 1.0  | HS3ST3B1  |
| 9951   | 1.0  | 1.0  | -3.1 | 1.0  | HS3ST4    |
| 90161  | 1.0  | 1.0  | -3.0 | 1.0  | HS6ST2    |
| 266722 | -1.5 | 1.0  | 1.0  | -6.1 | HS6ST3    |
| 3281   | 1.0  | -5.1 | -4.8 | -4.4 | HSBP1     |
| 150274 | 1.0  | 1.0  | 1.0  | -3.4 | HSCB      |
| 3295   | 1.0  | 1.0  | 1.0  | 1.0  | HSD17B4   |
| 8630   | 1.0  | 1.0  | 1.0  | 1.0  | HSD17B6   |
| 51478  | 1.0  | 1.0  | 1.0  | -2.5 | HSD17B7   |
| 80270  | -2.7 | 1.0  | 3.0  | 1.0  | HSD3B7    |
| 84263  | 1.0  | -3.6 | -4.0 | 1.0  | HSDL2     |
| 3298   | 1.0  | 4.4  | 5.7  | 1.0  | HSF2      |
| 84941  | 1.0  | 1.0  | 1.0  | 1.0  | HSH2D     |
| 259217 | 1.9  | 1.0  | 1.0  | 1.0  | HSPA12A   |
| 51182  | 1.0  | 1.0  | 1.0  | 1.0  | HSPA14    |
| 3303   | 1.0  | 1.0  | 1.0  | 2.6  | HSPA1A    |
| 3305   | 1.0  | 1.0  | -6.7 | 1.0  | HSPA1L    |
| 3315   | 1.0  | 1.0  | -7.6 | 1.0  | HSPB1     |
| 8988   | 1.0  | 1.0  | 1.0  | 1.0  | HSPB3     |
| 27129  | 1.0  | 1.0  | 1.0  | 1.0  | HSPB7     |
| 79663  | 1.0  | 1.0  | 1.0  | 1.0  | HSPBAP1   |
| 23640  | 1.6  | 1.0  | 1.0  | 1.0  | HSPBP1    |
| 3329   | 1.0  | 1.0  | 1.0  | 1.0  | HSPD1     |
| 3336   | 1.0  | 2.6  | 2.6  | 1.0  | HSPE1     |
| 3339   | 1.0  | 1.0  | 1.0  | 1.0  | HSPG2     |
| 10808  | 1.0  | 1.0  | -3.1 | 1.0  | HSPH1     |
| 27336  | 1.0  | 1.0  | 1.0  | 1.0  | HTATSF1   |
| 401233 | 1.0  | 1.0  | 2.8  | 1.0  | HTATSF1P2 |
| 3350   | 1.0  | 1.0  | -3.5 | 1.0  | HTR1A     |
| 3352   | 1.0  | 1.0  | 1.0  | 1.0  | HTR1D     |
| 3359   | 1.0  | 1.0  | 1.0  | 3.8  | HTR3A     |
| 9177   | 1.0  | 1.0  | 1.0  | 1.0  | HTR3B     |
| 27429  | 1.0  | 1.0  | 5.1  | 1.0  | HTRA2     |
| 94031  | 1.0  | 1.0  | 1.0  | 1.0  | HTRA3     |
| 3064   | 1.0  | 1.0  | 1.0  | -1.6 | HTT       |

|        |       |      |      |      |         |
|--------|-------|------|------|------|---------|
| 10075  | 2.7   | 1.0  | 1.0  | 6.2  | HUWE1   |
| 84329  | 1.0   | 1.0  | 1.0  | 1.0  | HVCN1   |
| 54768  | 1.0   | 1.0  | 1.0  | 1.0  | HYDIN   |
| 3376   | 1.0   | 3.3  | -2.9 | 3.2  | IARS    |
| 55699  | 1.0   | 1.0  | 1.0  | 1.0  | IARS2   |
| 3382   | 1.0   | 1.0  | 1.0  | 1.0  | ICA1    |
| 3386   | 1.0   | 1.0  | -6.3 | -3.9 | ICAM4   |
| 7087   | 1.0   | 3.1  | 1.0  | 2.7  | ICAM5   |
| 23463  | -15.4 | 1.0  | 1.0  | 1.0  | ICMT    |
| 29851  | 1.0   | 1.0  | -3.1 | -3.0 | ICOS    |
| 23308  | 6.5   | 1.0  | 1.7  | 1.0  | ICOSLG  |
| 3399   | 1.0   | -3.2 | 1.0  | 1.0  | ID3     |
| 3400   | 2.1   | 1.0  | 3.4  | 1.0  | ID4     |
| 3420   | 1.0   | -2.5 | 1.0  | 1.0  | IDH3B   |
| 3422   | 1.0   | 1.0  | 2.2  | 1.0  | IDI1    |
| 91734  | 1.0   | 1.0  | 1.0  | 1.0  | IDI2    |
| 3620   | 1.0   | 1.0  | 1.0  | 1.0  | IDO1    |
| 3423   | -2.3  | 1.0  | 4.8  | 1.0  | IDS     |
| 3425   | 1.0   | 1.0  | 1.0  | 1.0  | IDUA    |
| 9592   | 1.0   | 1.0  | 2.5  | 4.3  | IER2    |
| 8870   | 1.0   | 1.0  | 1.0  | -1.7 | IER3    |
| 51278  | 1.0   | 1.0  | 1.0  | 1.0  | IER5    |
| 25900  | 1.0   | 1.0  | 1.0  | 1.0  | IFFO1   |
| 3428   | 1.0   | -3.4 | -6.8 | -5.0 | IFI16   |
| 122509 | 3.0   | 1.0  | 1.0  | 1.0  | IFI27L1 |
| 83982  | 3.4   | 1.0  | 6.2  | 6.6  | IFI27L2 |
| 10437  | 1.0   | 1.0  | 1.0  | 1.0  | IFI30   |
| 10964  | 1.0   | 1.0  | 1.0  | 4.5  | IFI44L  |
| 3433   | 1.0   | 1.0  | 1.0  | 1.0  | IFIT2   |
| 8519   | 1.0   | 1.0  | -4.1 | 1.0  | IFITM1  |
| 10581  | 1.0   | 1.0  | 1.0  | 1.0  | IFITM2  |
| 387733 | 1.0   | 5.5  | 1.0  | 1.0  | IFITM5  |
| 3452   | 1.0   | 1.0  | -3.0 | 1.0  | IFNA21  |
| 3441   | 1.0   | 1.0  | 1.0  | 1.0  | IFNA4   |
| 3443   | 1.0   | 1.0  | 1.0  | -3.9 | IFNA6   |
| 3454   | 1.6   | 1.0  | -2.4 | 1.0  | IFNAR1  |
| 3456   | 1.0   | 1.0  | 1.0  | 1.0  | IFNB1   |
| 338376 | 1.0   | -2.9 | 1.0  | 1.0  | IFNE    |
| 3459   | 1.0   | 1.0  | 1.0  | 1.0  | IFNGR1  |
| 3475   | -2.4  | -3.4 | 1.0  | -3.2 | IFRD1   |
| 55081  | 1.0   | 1.0  | 1.0  | 1.0  | IFT57   |
| 80173  | 1.0   | 1.0  | -3.1 | -3.1 | IFT74   |
| 57560  | 1.0   | 1.0  | 1.0  | 1.0  | IFT80   |
| 3479   | 1.0   | 1.0  | 1.0  | 1.0  | IGF1    |
| 3481   | 1.0   | 1.0  | 1.0  | 1.0  | IGF2    |
| 10642  | 1.5   | 1.0  | -5.5 | 1.0  | IGF2BP1 |
| 10644  | -2.2  | 1.0  | -4.7 | 1.0  | IGF2BP2 |
| 10643  | 1.0   | 1.0  | 1.0  | -3.1 | IGF2BP3 |

|        |       |      |      |      |          |
|--------|-------|------|------|------|----------|
| 3482   | 1.0   | 1.0  | -3.4 | 1.0  | IGF2R    |
| 3485   | 2.1   | 1.0  | 2.2  | 2.1  | IGFBP2   |
| 3486   | 1.0   | 1.0  | 1.0  | 1.0  | IGFBP3   |
| 91156  | 1.0   | 1.0  | 1.0  | 1.0  | IGFN1    |
| 3508   | 1.0   | 1.0  | 4.7  | 1.0  | IGHMBP2  |
| 3512   | 1.0   | 1.0  | -2.5 | 1.0  | IGJ      |
| 3543   | 1.0   | 1.0  | 1.0  | 1.0  | IGLL1    |
| 402665 | -10.4 | 1.0  | 1.0  | 1.0  | IGLON5   |
| 285313 | 1.0   | 1.0  | 1.0  | -4.8 | IGSF10   |
| 84966  | 1.0   | 1.0  | 1.0  | 1.0  | IGSF21   |
| 3321   | 1.5   | 1.0  | 1.0  | 1.0  | IGSF3    |
| 93185  | 1.0   | 1.0  | 1.0  | 1.0  | IGSF8    |
| 57549  | 1.0   | 1.7  | 1.0  | 1.0  | IGSF9    |
| 10320  | 1.0   | 1.0  | 1.0  | 1.0  | IKZF1    |
| 22807  | 1.0   | 2.6  | 1.0  | 1.0  | IKZF2    |
| 3586   | 1.0   | 1.0  | 1.0  | 1.0  | IL10     |
| 3590   | 1.0   | 3.6  | 3.2  | 1.0  | IL11RA   |
| 3600   | 1.0   | 1.0  | 1.8  | 1.6  | IL15     |
| 3603   | 1.0   | -6.9 | -5.8 | 1.0  | IL16     |
| 27189  | 1.8   | 1.0  | 1.0  | 1.0  | IL17C    |
| 23765  | 1.0   | 1.0  | 1.0  | 1.0  | IL17RA   |
| 55540  | 1.0   | 1.0  | -2.3 | 1.0  | IL17RB   |
| 132014 | 1.0   | 1.0  | 3.9  | 3.8  | IL17RE   |
| 10068  | 1.7   | 3.1  | 1.0  | 1.0  | IL18BP   |
| 8807   | 1.0   | 1.0  | 1.0  | 1.0  | IL18RAP  |
| 84639  | -2.0  | 1.0  | 1.0  | 1.0  | IL1F10   |
| 3554   | -1.7  | 1.0  | 1.0  | 1.0  | IL1R1    |
| 7850   | 1.0   | 1.0  | 1.0  | 1.0  | IL1R2    |
| 26280  | 1.0   | 1.8  | 1.9  | 1.0  | IL1RAPL2 |
| 8808   | 1.0   | 1.0  | 1.0  | 1.0  | IL1RL2   |
| 3558   | 1.0   | -3.0 | -3.3 | 1.0  | IL2      |
| 50604  | 1.0   | 1.0  | -5.2 | 1.0  | IL20     |
| 9466   | 2.0   | 1.0  | 1.0  | 1.0  | IL27RA   |
| 282617 | 1.0   | 1.0  | 1.0  | 1.0  | IL28B    |
| 163702 | 1.0   | 1.0  | 1.0  | 1.0  | IL28RA   |
| 386653 | 1.0   | 1.0  | 1.0  | 1.0  | IL31     |
| 133396 | 1.0   | 1.0  | 1.0  | 1.0  | IL31RA   |
| 90865  | 1.0   | 1.0  | 3.5  | 1.0  | IL33     |
| 27177  | 1.0   | 1.0  | 1.0  | 2.7  | IL36B    |
| 56300  | 1.0   | 2.9  | 3.8  | 2.7  | IL36G    |
| 3565   | 1.0   | 1.0  | 1.0  | -2.2 | IL4      |
| 3566   | 1.0   | 1.0  | 1.0  | 1.0  | IL4R     |
| 3567   | 1.0   | 1.0  | -6.8 | 1.0  | IL5      |
| 3569   | 1.0   | 1.0  | 1.0  | -6.5 | IL6      |
| 3572   | 3.0   | -8.0 | -9.3 | -6.2 | IL6ST    |
| 3574   | 1.0   | -6.9 | -7.1 | -9.8 | IL7      |
| 3581   | 1.0   | 2.6  | 2.6  | 2.5  | IL9R     |
| 286676 | 1.0   | 1.0  | 1.0  | 1.0  | ILDR1    |

|        |       |      |      |       |          |
|--------|-------|------|------|-------|----------|
| 3609   | 1.0   | 1.0  | 3.6  | 1.0   | ILF3     |
| 92856  | 4.0   | 2.4  | 1.0  | 1.0   | IMP4     |
| 162540 | 1.0   | 1.0  | 1.0  | 1.0   | IMP5     |
| 3612   | 1.0   | 1.0  | 5.0  | 1.0   | IMPA1    |
| 3613   | 1.0   | 1.8  | 3.6  | 3.6   | IMPA2    |
| 3614   | 1.6   | -5.2 | 1.0  | 1.0   | IMPDH1   |
| 50939  | 1.0   | 1.0  | 1.0  | 1.0   | IMPG2    |
| 10207  | 1.0   | 1.0  | 1.0  | 1.0   | INADL    |
| 64423  | 1.7   | 3.9  | 1.0  | 1.0   | INF2     |
| 3621   | 1.0   | 1.0  | 1.0  | 1.0   | ING1     |
| 54556  | 1.0   | 1.0  | 2.5  | 1.8   | ING3     |
| 3624   | 1.0   | 1.0  | 2.2  | 1.0   | INHBA    |
| 83729  | 1.0   | 1.0  | 3.7  | 1.0   | INHBE    |
| 11185  | 1.0   | 1.0  | 1.0  | 3.0   | INMT     |
| 83444  | 1.0   | 1.0  | 2.8  | 1.0   | INO80B   |
| 54891  | 1.0   | -2.2 | 1.0  | -2.2  | INO80D   |
| 283899 | 1.0   | 1.0  | 1.0  | -3.0  | INO80E   |
| 3631   | 1.0   | 5.7  | 5.0  | 6.3   | INPP4A   |
| 3632   | 1.0   | 1.0  | 1.0  | 1.0   | INPP5A   |
| 3633   | 1.0   | 1.0  | 1.0  | 1.0   | INPP5B   |
| 56623  | 1.0   | 1.0  | 1.0  | 4.0   | INPP5E   |
| 22876  | 1.0   | 3.2  | 1.0  | 4.0   | INPP5F   |
| 51141  | 1.6   | 1.0  | 1.0  | -2.4  | INSIG2   |
| 3643   | 1.0   | 1.0  | 1.0  | 1.0   | INSR     |
| 3645   | 1.0   | 1.0  | 1.0  | 1.0   | INSRR    |
| 26173  | 4.2   | 1.0  | 1.0  | 6.4   | INTS1    |
| 55174  | 1.0   | 1.0  | 1.0  | 2.3   | INTS10   |
| 57117  | 1.0   | 1.0  | 1.0  | 1.0   | INTS12   |
| 26512  | -14.8 | 1.0  | 1.0  | 1.0   | INTS6    |
| 55656  | 1.0   | 1.0  | 1.0  | 1.0   | INTS8    |
| 27152  | 1.0   | 1.0  | 1.0  | 3.1   | INTU     |
| 27130  | 1.0   | 1.0  | 1.0  | -4.2  | INVS     |
| 26034  | 1.0   | 1.0  | 1.0  | 1.0   | IPCEF1   |
| 3843   | 5.4   | 1.0  | 1.0  | 1.0   | IPO5     |
| 10527  | -1.5  | -2.6 | 1.0  | 1.0   | IPO7     |
| 64768  | 1.0   | 1.0  | 2.3  | 1.0   | IPPK     |
| 3653   | 1.0   | 1.0  | 7.7  | 1.0   | IPW      |
| 389124 | 1.0   | 1.0  | -6.7 | 1.0   | IQCF5    |
| 64799  | 1.0   | -2.3 | 1.0  | 1.0   | IQCH     |
| 8826   | -1.7  | 1.0  | 1.0  | 1.0   | IQGAP1   |
| 23096  | -2.0  | 1.0  | 1.0  | 1.0   | IQSEC2   |
| 134728 | 1.0   | 1.0  | -5.2 | -6.2  | IRAK1BP1 |
| 3659   | 1.0   | 1.0  | 4.7  | 1.0   | IRF1     |
| 3660   | 1.0   | 1.0  | 1.0  | 1.0   | IRF2     |
| 3665   | 1.0   | 1.0  | 1.0  | 1.0   | IRF7     |
| 10379  | 1.0   | 1.0  | 1.0  | 1.0   | IRF9     |
| 8660   | 1.0   | -5.0 | 1.0  | 1.0   | IRS2     |
| 8471   | 1.0   | 1.0  | 1.0  | -13.8 | IRS4     |



|        |       |      |      |      |         |
|--------|-------|------|------|------|---------|
| 79192  | 2.9   | 1.0  | 1.0  | 1.0  | IRX1    |
| 50805  | -2.9  | 1.0  | 1.0  | 1.0  | IRX4    |
| 10265  | 1.0   | 1.0  | 1.0  | 1.0  | IRX5    |
| 81689  | 1.0   | 3.4  | 5.0  | 1.0  | ISCA1   |
| 81875  | -3.5  | 1.0  | -1.8 | 1.0  | ISG20L2 |
| 3670   | 5.9   | 1.0  | -2.4 | -2.0 | ISL1    |
| 140862 | 2.8   | 1.0  | 1.0  | 1.0  | ISM1    |
| 145501 | 1.0   | 1.0  | 1.0  | 1.0  | ISM2    |
| 91464  | 1.0   | 1.0  | 1.0  | -5.8 | ISX     |
| 51477  | -1.7  | 1.0  | -4.0 | 1.0  | ISYNA1  |
| 81533  | 1.0   | 1.0  | 1.0  | 1.0  | ITFG1   |
| 3676   | 1.0   | 1.0  | 2.6  | 1.0  | ITGA4   |
| 3655   | 1.0   | 4.9  | 3.7  | 4.9  | ITGA6   |
| 3679   | 2.4   | 1.0  | 1.0  | 1.0  | ITGA7   |
| 3682   | 1.0   | 1.0  | 1.0  | 1.0  | ITGAE   |
| 3684   | 1.0   | 3.2  | 3.6  | 2.7  | ITGAM   |
| 3687   | 1.0   | 1.0  | 1.0  | 1.0  | ITGAX   |
| 3688   | -1.7  | 1.0  | 1.0  | 1.0  | ITGB1   |
| 3689   | 1.0   | 1.0  | -2.9 | 1.0  | ITGB2   |
| 3691   | -2.1  | 1.0  | 1.0  | 1.0  | ITGB4   |
| 3694   | 1.0   | 1.0  | -2.2 | 1.0  | ITGB6   |
| 3700   | 1.0   | 1.0  | -2.6 | 1.0  | ITIH4   |
| 142683 | 1.0   | 2.1  | 1.0  | 1.0  | ITLN2   |
| 9445   | 1.0   | 1.0  | 2.9  | 4.5  | ITM2B   |
| 81618  | 1.0   | 1.0  | 1.0  | 1.0  | ITM2C   |
| 3704   | 1.0   | 3.5  | 1.0  | 4.3  | ITPA    |
| 3713   | 1.0   | 1.0  | -4.0 | 1.0  | IVL     |
| 55677  | 1.0   | 1.0  | -4.3 | 1.0  | IWS1    |
| 389434 | 1.0   | 1.0  | 1.0  | 1.5  | IYD     |
| 284359 | 1.0   | 1.0  | 1.0  | 1.0  | IZUMO1  |
| 3714   | 1.0   | 1.0  | 3.8  | 3.5  | JAG2    |
| 3716   | -1.8  | -3.9 | -3.6 | 1.0  | JAK1    |
| 3717   | 1.0   | 1.0  | 1.0  | -7.1 | JAK2    |
| 58494  | 5.1   | 1.0  | 1.0  | 1.0  | JAM2    |
| 80853  | -3.6  | 3.1  | 2.8  | 1.0  | JHDM1D  |
| 65094  | -10.8 | 1.0  | 2.4  | 1.0  | JMJD4   |
| 126119 | -1.7  | -3.8 | 1.0  | 1.0  | JOSD2   |
| 57158  | 1.0   | 1.0  | 3.6  | 1.0  | JPH2    |
| 57338  | 1.0   | 1.0  | 1.0  | 1.0  | JPH3    |
| 8690   | 1.0   | 1.0  | 1.0  | 1.0  | JRKL    |
| 10899  | 1.0   | 2.2  | 1.0  | 1.0  | JTB     |
| 3725   | -1.7  | 1.0  | 1.0  | 1.0  | JUN     |
| 3727   | -1.5  | 1.0  | 3.2  | 1.0  | JUND    |
| 353219 | -3.2  | 1.0  | 1.0  | 1.0  | KAAG1   |
| 8997   | 1.0   | -3.3 | 1.0  | 1.0  | KALRN   |
| 256949 | 1.0   | 1.0  | 1.0  | 1.0  | KANK3   |
| 163782 | 1.0   | 1.0  | 1.0  | 1.0  | KANK4   |
| 54934  | 1.0   | 1.0  | 1.0  | 1.0  | KANSL2  |

|        |       |      |      |      |         |
|--------|-------|------|------|------|---------|
| 2648   | 1.0   | 1.0  | 1.0  | 1.0  | KAT2A   |
| 10524  | -2.6  | 1.0  | 1.0  | -3.8 | KAT5    |
| 7994   | 1.0   | 2.7  | 1.0  | 1.8  | KAT6A   |
| 23522  | -10.4 | -2.8 | -2.8 | 1.0  | KAT6B   |
| 84056  | 1.0   | 5.5  | 7.7  | 3.7  | KATNAL1 |
| 83473  | 1.0   | 1.0  | 1.0  | 1.0  | KATNAL2 |
| 55709  | 1.0   | 1.0  | 1.0  | 1.0  | KBTBD4  |
| 131377 | 1.0   | 1.0  | 1.0  | 2.2  | KBTBD5  |
| 84078  | 1.0   | 1.0  | 1.0  | 1.0  | KBTBD7  |
| 84541  | -22.1 | 1.0  | 1.0  | 1.0  | KBTBD8  |
| 56888  | 1.0   | 1.0  | 3.3  | 1.0  | KCMF1   |
| 3744   | -2.0  | 1.0  | -3.5 | 1.0  | KCNA10  |
| 3741   | 1.0   | 1.0  | 3.2  | 1.0  | KCNA5   |
| 8514   | 1.0   | 1.0  | 1.0  | 1.0  | KCNAB2  |
| 9196   | 1.0   | -6.2 | -7.2 | -5.2 | KCNAB3  |
| 3745   | 1.0   | 1.0  | -6.0 | 1.0  | KCNB1   |
| 23630  | 1.0   | 1.0  | 1.0  | 1.0  | KCNE1L  |
| 23704  | 1.0   | 1.0  | 1.0  | 2.0  | KCNE4   |
| 3754   | 1.0   | 1.0  | 1.0  | 1.0  | KCNF1   |
| 3755   | -1.5  | 1.0  | 1.0  | 2.4  | KCNG1   |
| 170850 | 1.0   | 1.0  | 1.0  | 1.0  | KCNG3   |
| 27133  | -2.7  | 1.0  | 1.0  | 5.6  | KCNH5   |
| 3769   | 1.0   | 1.0  | 1.0  | 1.0  | KCNJ13  |
| 3772   | -26.2 | 1.0  | 1.0  | 1.0  | KCNJ15  |
| 3759   | 1.0   | 1.0  | 1.0  | 3.5  | KCNJ2   |
| 3762   | 1.0   | -5.2 | 1.0  | -3.9 | KCNJ5   |
| 3764   | 1.0   | 1.0  | -1.5 | 1.0  | KCNJ8   |
| 3765   | 1.0   | 1.0  | 1.0  | 1.0  | KCNJ9   |
| 54207  | 1.0   | 1.0  | 1.0  | 1.0  | KCNK10  |
| 83795  | 1.0   | 1.0  | 1.0  | 1.0  | KCNK16  |
| 3777   | 1.0   | -3.1 | 1.0  | 1.0  | KCNK3   |
| 8645   | 1.0   | 1.0  | 1.0  | 1.0  | KCNK5   |
| 51305  | 1.0   | 1.0  | 1.0  | 1.0  | KCNK9   |
| 3778   | -10.1 | 1.0  | 1.0  | -2.8 | KCNMA1  |
| 3783   | 1.0   | 1.0  | 1.0  | 2.4  | KCNN4   |
| 3785   | 1.5   | 1.0  | 1.0  | 2.6  | KCNQ2   |
| 3786   | -2.3  | 1.0  | 1.0  | -2.4 | KCNQ3   |
| 56479  | 1.0   | 1.0  | 1.0  | 1.0  | KCNQ5   |
| 3790   | 1.0   | 1.0  | -3.8 | -3.0 | KCNS3   |
| 27012  | 1.0   | 1.0  | 1.0  | -6.0 | KCNV1   |
| 169522 | 1.0   | 3.3  | 1.0  | 1.0  | KCNV2   |
| 147040 | 1.7   | 1.0  | 1.9  | 2.7  | KCTD11  |
| 115207 | 1.0   | 1.0  | 1.0  | 1.0  | KCTD12  |
| 253980 | -2.4  | 1.0  | 1.0  | 1.0  | KCTD13  |
| 79047  | 1.0   | 1.0  | 1.0  | 1.0  | KCTD15  |
| 51133  | 1.0   | 1.0  | 5.6  | 3.4  | KCTD3   |
| 54442  | 1.0   | 1.0  | 4.6  | 6.0  | KCTD5   |
| 79070  | 1.0   | 1.0  | 1.0  | 1.0  | KDELC1  |

|           |      |      |      |      |             |
|-----------|------|------|------|------|-------------|
| 10945     | 1.0  | 1.0  | 1.0  | 1.0  | KDELR1      |
| 221656    | 1.6  | -3.3 | -4.9 | -2.9 | KDM1B       |
| 84678     | 1.0  | 1.0  | 1.0  | 1.0  | KDM2B       |
| 9682      | 1.0  | 1.0  | 1.0  | 1.0  | KDM4A       |
| 10765     | 2.9  | 1.0  | 6.6  | 5.1  | KDM5B       |
| 7403      | -1.7 | 1.0  | 1.0  | 2.7  | KDM6A       |
| 2531      | 1.0  | 1.0  | 1.0  | 1.0  | KDSR        |
| 387628    | 1.0  | 1.0  | 1.0  | 1.0  | KGFLP1      |
| 80759     | 1.0  | 3.2  | 1.0  | 1.0  | KHDC1       |
| 10656     | 1.0  | 4.6  | 1.0  | 1.0  | KHDRBS3     |
| 3795      | 1.0  | -6.9 | 1.0  | 1.0  | KHK         |
| 23351     | 1.0  | 1.0  | 3.0  | 1.0  | KHNYN       |
| 124602    | 1.6  | 3.2  | 1.0  | 1.0  | KIF19       |
| 10112     | 1.0  | 2.7  | 2.7  | 2.4  | KIF20A      |
| 23046     | 2.3  | 1.0  | 1.0  | 1.0  | KIF21B      |
| 9493      | 1.0  | 1.0  | 1.0  | 1.0  | KIF23       |
| 55083     | 1.0  | 1.0  | 1.0  | 1.0  | KIF26B      |
| 3796      | 1.0  | 1.0  | 1.0  | 1.0  | KIF2A       |
| 84643     | 1.0  | -3.0 | -3.7 | -3.5 | KIF2B       |
| 11004     | 1.0  | 1.0  | 1.0  | 3.0  | KIF2C       |
| 3797      | 1.0  | 2.2  | 1.0  | 2.9  | KIF3C       |
| 3798      | 1.0  | 1.0  | 2.8  | 1.0  | KIF5A       |
| 221458    | 1.0  | -3.3 | 1.0  | 1.0  | KIF6        |
| 22920     | 1.0  | 5.4  | 4.9  | 1.0  | KIFAP3      |
| 90990     | 1.0  | 4.0  | 1.0  | 1.0  | KIFC2       |
| 3801      | 1.0  | 1.0  | 1.0  | 1.0  | KIFC3       |
| 100132285 | 1.0  | -3.4 | 1.0  | 1.0  | KIR2DS2     |
| 3809      | 1.0  | 1.0  | 1.0  | 1.0  | KIR2DS4     |
| 115653    | 1.0  | 2.5  | 1.0  | 1.0  | KIR3DL3     |
| 55243     | 1.0  | 1.0  | 1.0  | 1.0  | KIRREL      |
| 283165    | 1.0  | 2.8  | 3.1  | 1.0  | KIRREL3-AS3 |
| 3815      | 1.0  | 1.0  | 1.0  | 1.0  | KIT         |
| 4254      | 1.0  | 1.0  | 1.0  | 1.0  | KITLG       |
| 152831    | 1.0  | 1.0  | 1.0  | 4.7  | KLB         |
| 64837     | 1.0  | -3.7 | -1.7 | 1.0  | KLC2        |
| 10661     | 1.0  | 2.6  | 2.5  | 1.0  | KLF1        |
| 8462      | 1.0  | -8.1 | -6.4 | -6.4 | KLF11       |
| 28999     | 1.0  | 1.0  | 1.0  | 1.0  | KLF15       |
| 11279     | 1.0  | 1.0  | 2.0  | 1.0  | KLF8        |
| 113730    | 2.7  | 1.0  | 1.0  | 2.3  | KLHDC7B     |
| 59349     | 1.0  | 1.0  | 1.0  | -4.7 | KLHL12      |
| 90293     | 1.0  | 5.3  | 1.0  | 5.1  | KLHL13      |
| 9903      | 1.0  | 1.0  | 1.0  | 1.0  | KLHL21      |
| 151230    | 1.0  | 1.0  | -7.8 | 1.0  | KLHL23      |
| 64410     | 1.0  | 1.0  | 1.0  | 1.0  | KLHL25      |
| 283212    | 1.0  | 1.0  | -3.3 | 1.0  | KLHL35      |
| 79786     | 1.0  | 1.0  | 1.0  | 1.0  | KLHL36      |
| 57563     | 1.0  | 1.0  | 1.0  | 1.0  | KLHL8       |

|           |      |      |      |      |           |
|-----------|------|------|------|------|-----------|
| 55958     | 1.0  | 4.0  | 3.2  | 5.2  | KLHL9     |
| 5655      | 1.0  | 1.0  | 1.0  | 6.4  | KLK10     |
| 26085     | 1.0  | 1.0  | 1.0  | 1.0  | KLK13     |
| 3817      | 1.0  | 1.0  | 1.0  | 1.0  | KLK2      |
| 5653      | 1.0  | 1.0  | 1.0  | 1.0  | KLK6      |
| 3821      | 1.0  | 1.0  | 3.7  | 1.0  | KLRC1     |
| 8302      | 1.0  | 2.8  | 5.6  | 1.0  | KLRC4     |
| 51348     | 1.0  | 1.0  | 1.0  | 1.0  | KLRF1     |
| 10219     | 1.0  | 1.0  | 1.0  | 1.0  | KLRG1     |
| 346689    | 1.0  | 1.0  | 1.0  | 1.0  | KLRG2     |
| 8564      | 1.0  | 1.0  | 1.0  | 1.0  | KMO       |
| 9735      | 1.0  | 2.2  | 1.0  | 2.6  | KNTC1     |
| 3838      | 1.0  | 1.0  | 1.0  | 1.0  | KPNA2     |
| 3837      | -4.1 | -4.0 | 1.0  | 1.0  | KPNB1     |
| 83999     | 1.0  | 1.0  | -2.4 | 1.0  | KREMEN1   |
| 79412     | 1.0  | 1.0  | 1.0  | -6.5 | KREMEN2   |
| 65095     | 1.0  | 1.0  | 4.8  | 1.0  | KRI1      |
| 889       | 1.0  | 1.0  | 1.0  | 1.0  | KRIT1     |
| 11103     | 1.0  | 1.0  | -3.9 | 1.0  | KRR1      |
| 3859      | 1.0  | 1.0  | 1.0  | 1.0  | KRT12     |
| 3860      | 1.0  | 1.0  | 6.7  | 1.0  | KRT13     |
| 3872      | 3.0  | 1.0  | 1.0  | 6.5  | KRT17     |
| 3880      | 1.6  | 6.2  | 5.7  | 3.6  | KRT19     |
| 162605    | 3.0  | 1.0  | 1.0  | 1.7  | KRT28     |
| 3882      | 1.0  | 1.0  | 1.0  | 1.0  | KRT32     |
| 3883      | 1.0  | 1.0  | 1.0  | 1.0  | KRT33A    |
| 3886      | 1.0  | 1.0  | 1.0  | 1.0  | KRT35     |
| 8688      | 1.0  | 1.0  | 2.9  | 1.0  | KRT37     |
| 125115    | -1.9 | 1.0  | 1.0  | 1.0  | KRT40     |
| 3852      | 1.0  | 1.0  | 1.0  | 1.0  | KRT5      |
| 140807    | 1.0  | 1.7  | 2.9  | 1.0  | KRT72     |
| 121391    | 1.0  | 1.0  | 1.0  | 1.0  | KRT74     |
| 3889      | 1.0  | 1.0  | 1.0  | 2.0  | KRT83     |
| 3891      | -1.8 | 1.0  | 1.0  | 1.0  | KRT85     |
| 353332    | 1.0  | 1.0  | -4.2 | 1.0  | KRTAP12-1 |
| 140258    | 1.0  | 1.0  | 1.0  | 2.8  | KRTAP13-1 |
| 337882    | -3.6 | 1.0  | 1.0  | 1.0  | KRTAP19-1 |
| 85294     | 3.1  | 1.0  | 3.1  | 1.0  | KRTAP2-4  |
| 83896     | 1.0  | -1.8 | -1.9 | -1.8 | KRTAP3-1  |
| 83897     | 1.0  | 2.3  | 1.9  | 1.0  | KRTAP3-2  |
| 85285     | -2.3 | 1.0  | 1.0  | 1.0  | KRTAP4-1  |
| 84616     | 1.0  | 1.0  | 1.0  | 1.0  | KRTAP4-4  |
| 81871     | 1.0  | 1.0  | 1.0  | 4.8  | KRTAP4-6  |
| 100132476 | 1.8  | 1.0  | 1.0  | 1.0  | KRTAP4-7  |
| 728224    | 1.0  | 1.0  | 1.0  | 1.0  | KRTAP4-8  |
| 100132386 | 1.0  | 1.0  | 3.3  | 1.0  | KRTAP4-9  |
| 83900     | 1.0  | 1.0  | 1.0  | 1.0  | KRTAP9-3  |
| 83901     | 1.0  | 1.0  | -4.2 | 1.0  | KRTAP9-8  |

|        |      |      |      |      |         |
|--------|------|------|------|------|---------|
| 200185 | 1.0  | 1.0  | 2.4  | 2.4  | KRTCAP2 |
| 283455 | 1.0  | 1.0  | 1.0  | 4.6  | KSR2    |
| 8942   | 1.0  | 1.0  | 1.0  | 1.0  | KYNU    |
| 79944  | -1.7 | 1.0  | 1.0  | 1.0  | L2HGDH  |
| 144811 | 1.8  | 1.0  | 1.0  | 1.0  | LACC1   |
| 3902   | -2.7 | 1.0  | 2.6  | 1.0  | LAG3    |
| 3903   | 1.0  | 1.0  | 1.0  | 1.0  | LAIR1   |
| 3904   | 1.0  | 1.0  | 1.0  | -3.0 | LAIR2   |
| 3906   | 1.0  | 2.7  | 3.1  | 1.0  | LALBA   |
| 3910   | 1.0  | 1.0  | 1.0  | 1.5  | LAMA4   |
| 3911   | -3.3 | 1.0  | 1.0  | 1.0  | LAMA5   |
| 3912   | 1.0  | 2.7  | 3.1  | 1.0  | LAMB1   |
| 22798  | 1.0  | 1.0  | -6.9 | -6.9 | LAMB4   |
| 3915   | 1.0  | 1.0  | 1.0  | 1.0  | LAMC1   |
| 10319  | 2.6  | 1.0  | 1.0  | 1.0  | LAMC3   |
| 3920   | 1.0  | 1.0  | -5.8 | 1.0  | LAMP2   |
| 27074  | 1.0  | 1.0  | 1.0  | 1.0  | LAMP3   |
| 55353  | 1.0  | 4.7  | 3.4  | 1.0  | LAPTM4B |
| 7805   | 1.0  | -4.0 | 1.0  | 1.0  | LAPTM5  |
| 23367  | 1.0  | 1.0  | 1.0  | 1.0  | LARP1   |
| 55132  | 1.0  | 1.0  | 1.0  | 1.0  | LARP1B  |
| 23185  | 1.0  | 1.8  | 1.9  | 1.5  | LARP4B  |
| 55323  | 1.0  | 1.0  | 4.8  | 4.5  | LARP6   |
| 51574  | 1.0  | 1.0  | 1.0  | 1.0  | LARP7   |
| 81887  | 1.0  | -3.2 | 1.0  | 1.0  | LAS1L   |
| 27040  | 1.0  | 2.6  | 1.0  | 3.7  | LAT     |
| 7462   | -2.2 | 1.0  | 1.0  | 1.0  | LAT2    |
| 54900  | 1.0  | 1.0  | -6.7 | 1.0  | LAX1    |
| 81606  | 1.0  | -2.6 | -1.8 | -2.6 | LBH     |
| 10660  | -3.6 | -2.7 | -2.7 | 1.0  | LBX1    |
| 85474  | 2.7  | 1.0  | 1.0  | 1.0  | LBX2    |
| 150082 | 1.0  | 1.0  | 1.0  | 1.0  | LCA5L   |
| 353139 | 2.7  | 1.0  | 1.0  | 1.0  | LCE2A   |
| 84648  | 3.4  | 1.0  | 2.7  | 1.0  | LCE3D   |
| 353145 | 1.0  | 1.0  | 1.0  | 1.0  | LCE3E   |
| 3933   | 1.0  | 1.0  | 2.4  | 1.0  | LCN1    |
| 158062 | 1.0  | 1.0  | 1.0  | 1.0  | LCN6    |
| 138307 | -2.5 | 1.0  | 1.0  | 1.0  | LCN8    |
| 254251 | 1.0  | 1.0  | 2.3  | 1.0  | LCORL   |
| 3936   | 1.0  | 1.0  | 1.0  | 1.0  | LCP1    |
| 3938   | 1.0  | 1.0  | 1.0  | 2.2  | LCT     |
| 9079   | 1.0  | -2.4 | -4.5 | -1.6 | LDB2    |
| 11155  | 1.0  | 1.0  | 1.0  | 1.0  | LDB3    |
| 3945   | 1.0  | 1.0  | 1.0  | 1.0  | LDHB    |
| 3948   | 1.0  | 1.0  | 1.0  | 2.2  | LDHC    |
| 197257 | 1.0  | 1.0  | 2.4  | 1.0  | LDHD    |
| 3949   | 2.7  | 2.4  | 1.0  | 1.0  | LDLR    |
| 23641  | 1.0  | 1.0  | 1.0  | -3.1 | LDOC1   |

|           |      |      |      |      |                 |
|-----------|------|------|------|------|-----------------|
| 116842    | 1.0  | -2.6 | 1.0  | 1.0  | LEAP2           |
| 11061     | 1.0  | 1.0  | 1.0  | 1.0  | LECT1           |
| 3950      | 1.0  | 1.0  | 1.0  | 1.0  | LECT2           |
| 7044      | 1.0  | 1.0  | 2.8  | 1.0  | LEFTY2          |
| 221496    | 1.0  | 1.0  | 1.0  | 1.0  | LEMD2           |
| 79165     | -5.5 | 1.0  | 1.0  | 1.0  | LENG1           |
| 94059     | -2.9 | 1.0  | -5.0 | -4.8 | LENG9           |
| 123169    | 1.0  | 1.0  | -2.8 | -2.7 | LEO1            |
| 3952      | 1.0  | 1.0  | 1.0  | 1.0  | LEP             |
| 3953      | 1.0  | 1.0  | -8.5 | 1.0  | LEPR            |
| 3954      | 2.4  | 1.0  | 1.0  | 1.0  | LETM1           |
| 25875     | 1.0  | 2.8  | 2.8  | 3.5  | LETMD1          |
| 3955      | 1.0  | -5.7 | 1.0  | 1.0  | LFNG            |
| 3957      | 1.0  | -2.2 | -2.4 | 1.0  | LGALS2          |
| 3964      | 1.0  | 1.0  | 1.0  | 1.0  | LGALS8          |
| 3965      | 1.0  | 3.0  | 1.0  | 1.0  | LGALS9          |
| 55203     | 1.0  | 1.0  | 1.0  | 1.0  | LGI2            |
| 163175    | 1.0  | 1.0  | 1.0  | 1.0  | LGI4            |
| 5641      | 1.0  | -4.0 | 1.0  | 1.0  | LGMN            |
| 3973      | 1.0  | 1.0  | 1.0  | 1.0  | LHCGR           |
| 3975      | 1.0  | 1.0  | 1.0  | 1.0  | LHX1            |
| 9355      | 1.0  | 1.0  | 1.0  | 1.0  | LHX2            |
| 56956     | 1.0  | -2.8 | 1.0  | 1.0  | LHX9            |
| 11019     | 1.0  | 1.0  | 1.0  | 1.0  | LIAS            |
| 3977      | -4.0 | 1.0  | 1.0  | 1.0  | LIFR            |
| 3978      | 1.0  | 1.0  | 6.4  | 1.0  | LIG1            |
| 3981      | 1.0  | 1.0  | -3.1 | 1.0  | LIG4            |
| 11026     | 1.0  | 1.0  | 1.0  | 1.7  | LILRA3          |
| 23547     | 1.0  | 1.0  | 1.0  | 2.7  | LILRA4          |
| 10859     | 1.6  | 1.0  | 1.0  | 1.0  | LILRB1          |
| 10288     | 1.0  | 1.0  | 1.0  | 1.0  | LILRB2          |
| 11006     | 1.0  | -7.3 | 1.0  | 1.0  | LILRB4          |
| 3982      | 1.0  | 1.0  | 1.0  | 1.0  | LIM2            |
| 80774     | 2.2  | 1.0  | 1.0  | 1.0  | LIMD2           |
| 3987      | 1.0  | 15.7 | 1.0  | 1.0  | LIMS1           |
| 55679     | 1.0  | 1.0  | 1.0  | 1.0  | LIMS2           |
| 100271835 | 1.0  | 1.0  | 1.0  | 1.0  | LIMS3-LOC440895 |
| 79727     | 1.0  | 1.0  | 1.0  | 1.0  | LIN28A          |
| 389421    | 1.0  | 1.0  | 1.0  | 1.0  | LIN28B          |
| 286826    | 1.0  | 1.0  | 1.0  | 1.0  | LIN9            |
| 145978    | 1.0  | 1.0  | 1.0  | -6.6 | LINC00052       |
| 147650    | 1.0  | 1.0  | 1.0  | 1.0  | LINC00085       |
| 644596    | 1.0  | 1.0  | 1.0  | 4.2  | LINC00087       |
| 79854     | 1.0  | 1.0  | 6.0  | 1.0  | LINC00115       |
| 112597    | 1.0  | 1.0  | -5.0 | 1.0  | LINC00152       |
| 54072     | 1.0  | -6.2 | 1.0  | -6.0 | LINC00158       |
| 440072    | 1.0  | 1.0  | 1.0  | 1.0  | LINC00167       |
| 285908    | 1.0  | 7.5  | 3.6  | 6.9  | LINC00174       |

|           |      |      |       |      |             |
|-----------|------|------|-------|------|-------------|
| 387644    | 1.0  | -3.6 | 1.0   | 1.0  | LINC00202   |
| 83655     | 1.0  | 1.0  | 1.0   | 1.0  | LINC00208   |
| 338005    | 1.0  | 1.0  | 1.0   | 1.0  | LINC00221   |
| 145200    | 1.0  | 1.0  | 1.0   | 1.0  | LINC00239   |
| 203429    | 1.0  | 1.0  | -5.5  | -4.6 | LINC00246A  |
| 286333    | 1.0  | 1.0  | 1.0   | 1.0  | LINC00256A  |
| 100128385 | 1.0  | 1.0  | 2.3   | 1.0  | LINC00256B  |
| 140828    | 1.0  | 1.0  | 1.0   | 1.0  | LINC00261   |
| 90271     | 1.0  | -5.1 | -8.0  | -8.7 | LINC00263   |
| 645528    | 1.0  | 1.0  | 1.0   | 1.0  | LINC00264   |
| 140849    | 1.0  | -2.6 | -10.6 | 1.0  | LINC00266-1 |
| 266919    | 1.0  | -5.0 | -7.5  | -5.3 | LINC00307   |
| 114036    | 1.0  | 1.0  | 1.0   | -6.8 | LINC00310   |
| 114038    | 1.0  | 1.0  | 1.0   | 1.0  | LINC00313   |
| 387486    | 1.0  | -1.9 | -1.7  | 1.0  | LINC00320   |
| 29092     | 1.0  | 1.0  | 1.0   | 2.3  | LINC00339   |
| 401237    | 1.0  | 4.7  | 5.0   | 1.0  | LINC00340   |
| 84791     | 1.0  | 1.0  | 1.0   | -2.3 | LINC00467   |
| 90632     | 1.0  | 1.0  | 1.0   | 1.0  | LINC00473   |
| 158314    | 1.0  | 1.0  | -2.4  | 1.0  | LINC00475   |
| 100128782 | 1.0  | 1.0  | 1.0   | 1.0  | LINC00476   |
| 388815    | 1.0  | 1.0  | -4.4  | 1.0  | LINC00478   |
| 84894     | 1.0  | 1.0  | -16.0 | 1.0  | LINGO1      |
| 158038    | 1.0  | 1.0  | 2.7   | 1.0  | LINGO2      |
| 3990      | 1.0  | 1.0  | 1.0   | 1.0  | LIPC        |
| 8513      | 1.0  | 1.0  | 1.0   | 1.0  | LIPF        |
| 3996      | 1.0  | 1.0  | 1.0   | -7.2 | LLGL1       |
| 3993      | 1.0  | 1.0  | 1.0   | 1.0  | LLGL2       |
| 79748     | 1.0  | 1.0  | 1.0   | 1.0  | LMAN1L      |
| 81562     | 1.0  | 1.0  | 1.0   | 1.0  | LMAN2L      |
| 29995     | 1.0  | 1.0  | 5.0   | 1.0  | LMCD1       |
| 64788     | -2.3 | -6.3 | 1.0   | 1.0  | LMF1        |
| 91289     | 1.0  | 1.0  | 1.0   | 1.0  | LMF2        |
| 4000      | 1.0  | -2.6 | -2.9  | -3.2 | LMNA        |
| 4004      | 1.0  | 1.0  | 1.0   | 1.0  | LMO1        |
| 8543      | 1.6  | 1.0  | 1.0   | 1.0  | LMO4        |
| 56203     | 16.0 | 1.0  | 7.2   | 1.0  | LMOD3       |
| 114783    | 1.0  | 1.0  | -5.0  | 1.0  | LMTK3       |
| 4012      | 1.0  | 1.0  | 2.7   | 3.2  | LNPEP       |
| 222484    | 1.0  | 1.0  | 4.8   | 1.0  | LNK2        |
| 503693    | 1.0  | 1.0  | 1.0   | 1.0  | LOH12CR2    |
| 164832    | 1.0  | 1.0  | 1.0   | 1.0  | LONRF2      |
| 79836     | 2.1  | 1.0  | 1.0   | 1.0  | LONRF3      |
| 4015      | 1.0  | 1.0  | 1.0   | 1.0  | LOX         |
| 125336    | 1.0  | 1.0  | 1.0   | 1.0  | LOXHD1      |
| 4016      | 1.0  | 1.0  | 1.0   | 1.0  | LOXL1       |
| 4017      | 1.0  | 1.0  | 2.0   | 1.0  | LOXL2       |
| 4018      | 1.0  | -3.1 | 1.0   | 1.0  | LPA         |

|           |      |      |      |      |           |
|-----------|------|------|------|------|-----------|
| 1902      | 1.0  | 1.0  | 1.0  | 1.0  | LPAR1     |
| 10161     | -2.6 | -6.8 | 1.0  | 1.0  | LPAR6     |
| 23266     | 1.0  | 1.0  | 1.0  | 4.7  | LPHN2     |
| 23284     | 1.0  | 1.0  | -2.6 | 1.0  | LPHN3     |
| 23175     | 1.0  | 1.0  | 1.0  | 1.0  | LPIN1     |
| 9227      | 1.0  | -1.8 | 1.0  | 1.0  | LRAT      |
| 57622     | 1.0  | -4.5 | 1.0  | 1.0  | LRFN1     |
| 57497     | -3.6 | 1.0  | 1.0  | 1.0  | LRFN2     |
| 79414     | 1.6  | 1.0  | 1.0  | 1.0  | LRFN3     |
| 136332    | 6.0  | 1.0  | 1.0  | 1.0  | LRGUK     |
| 26018     | 1.0  | 2.6  | 2.6  | 1.0  | LRIG1     |
| 121227    | 1.0  | 1.0  | -6.3 | -5.7 | LRIG3     |
| 26103     | 1.0  | 1.0  | 1.0  | 1.0  | LRIT1     |
| 340745    | 1.0  | 1.0  | 4.1  | 1.0  | LRIT2     |
| 4033      | 2.5  | 1.0  | 1.0  | 1.0  | LRMP      |
| 4035      | 1.0  | 2.7  | 2.7  | 2.6  | LRP1      |
| 4036      | 1.0  | 1.0  | 1.0  | 1.0  | LRP2      |
| 4037      | 1.0  | -7.0 | -5.0 | 1.0  | LRP3      |
| 91355     | 1.0  | 1.0  | 1.0  | 1.0  | LRP5L     |
| 4043      | 1.0  | 1.0  | 1.0  | 1.0  | LRPAP1    |
| 55227     | 1.0  | -5.8 | 4.4  | 1.0  | LRRC1     |
| 390205    | 1.0  | 1.0  | 1.0  | 1.0  | LRRC10B   |
| 90668     | 1.0  | -3.0 | 1.0  | -2.8 | LRRC16B   |
| 10234     | 1.0  | 1.0  | 1.0  | 1.0  | LRRC17    |
| 474354    | 2.2  | 1.0  | 1.0  | -4.4 | LRRC18    |
| 79442     | 1.0  | 1.0  | -7.4 | 1.0  | LRRC2     |
| 55222     | -8.8 | 1.0  | 1.0  | 1.0  | LRRC20    |
| 123355    | -2.2 | -4.8 | -4.8 | 1.0  | LRRC28    |
| 81543     | 1.0  | 1.0  | 1.0  | 1.0  | LRRC3     |
| 79782     | 1.0  | 1.6  | 1.0  | 1.0  | LRRC31    |
| 2615      | 1.8  | 1.0  | 1.0  | 1.0  | LRRC32    |
| 151827    | 1.0  | 1.0  | -4.9 | 1.0  | LRRC34    |
| 55282     | 1.0  | 1.0  | 1.0  | 1.0  | LRRC36    |
| 374819    | 1.0  | 1.0  | 1.0  | 1.0  | LRRC37A3  |
| 55073     | 1.0  | 5.0  | 1.0  | 1.0  | LRRC37A4  |
| 114659    | 1.0  | 1.0  | -4.6 | 1.0  | LRRC37B   |
| 147172    | 1.0  | -3.1 | 1.0  | 1.0  | LRRC37BP1 |
| 100505591 | 1.0  | 1.0  | 1.0  | 1.0  | LRRC3C    |
| 115353    | 1.0  | 1.0  | 3.4  | 2.5  | LRRC42    |
| 254050    | 1.0  | -5.7 | -5.6 | 1.0  | LRRC43    |
| 201255    | -3.0 | -3.1 | 1.0  | 1.0  | LRRC45    |
| 83450     | -2.4 | 1.0  | 3.5  | 1.0  | LRRC48    |
| 54839     | 1.0  | 1.0  | 3.2  | 1.0  | LRRC49    |
| 219527    | -9.3 | 1.0  | -5.7 | 1.0  | LRRC55    |
| 255252    | 1.0  | 1.0  | 1.0  | 1.0  | LRRC57    |
| 55379     | 1.0  | -2.5 | 1.0  | 1.0  | LRRC59    |
| 23639     | 1.0  | -3.8 | -4.4 | -4.3 | LRRC6     |
| 149499    | 1.0  | 1.0  | 1.0  | 1.0  | LRRC71    |



|        |      |      |      |      |         |
|--------|------|------|------|------|---------|
| 23507  | 2.1  | 1.5  | 1.0  | 1.0  | LRRC8B  |
| 84230  | 1.0  | 1.0  | 1.0  | 2.0  | LRRC8C  |
| 341883 | 1.0  | -3.3 | 1.0  | 1.0  | LRRC9   |
| 85444  | 1.0  | 1.0  | -2.6 | 1.0  | LRRCC1  |
| 9208   | 1.0  | 1.0  | -6.1 | 1.0  | LRRFIP1 |
| 127255 | 1.0  | -3.0 | 1.0  | 1.0  | LRRIQ3  |
| 347730 | 1.0  | 1.0  | 1.0  | 1.0  | LRRTM1  |
| 90678  | 1.0  | 1.0  | 1.0  | 1.0  | LRSAM1  |
| 57408  | 1.0  | 1.0  | 4.4  | 1.0  | LRTM1   |
| 654429 | 1.0  | 1.0  | 1.0  | 1.0  | LRTM2   |
| 220074 | 4.2  | 1.0  | 1.6  | 1.0  | LRTOMT  |
| 4045   | 1.0  | 1.0  | -3.3 | 1.0  | LSAMP   |
| 149986 | 1.0  | -4.1 | -4.3 | -7.7 | LSM14B  |
| 57819  | -2.1 | 1.0  | 1.0  | 1.0  | LSM2    |
| 27258  | -1.6 | 1.0  | 1.0  | 1.0  | LSM3    |
| 51690  | 1.0  | 4.5  | 1.5  | 1.0  | LSM7    |
| 4048   | 1.0  | -2.6 | -2.5 | -2.5 | LTA4H   |
| 4052   | 1.0  | 1.0  | 1.0  | 1.0  | LTBP1   |
| 4053   | -2.1 | 1.0  | 1.0  | 5.1  | LTBP2   |
| 26046  | 1.0  | 1.0  | 1.0  | 1.0  | LTN1    |
| 55692  | 1.0  | -3.8 | -3.5 | -3.4 | LUC7L   |
| 51747  | 1.0  | 1.0  | 1.0  | 1.0  | LUC7L3  |
| 7798   | 1.0  | 1.0  | 1.0  | 1.0  | LUZP1   |
| 8581   | -3.3 | 1.0  | 1.0  | 1.0  | LY6D    |
| 58496  | 1.0  | 1.0  | 1.0  | 1.0  | LY6G5B  |
| 80740  | 1.0  | 1.0  | -3.0 | 1.0  | LY6G6C  |
| 54742  | 1.0  | 1.0  | 1.0  | 1.0  | LY6K    |
| 9450   | 2.7  | 1.0  | 1.0  | 1.0  | LY86    |
| 4063   | 1.0  | 1.0  | 1.0  | 1.0  | LY9     |
| 129530 | 1.0  | -2.3 | 1.0  | 1.0  | LYG1    |
| 254773 | 1.0  | 1.0  | 1.0  | 1.0  | LYG2    |
| 4066   | 1.0  | 1.0  | 1.0  | 1.0  | LYL1    |
| 66004  | 1.0  | 1.0  | 1.0  | 1.0  | LYNX1   |
| 137797 | 1.0  | 1.0  | 1.0  | 2.4  | LYPD2   |
| 10434  | 1.0  | 1.8  | 2.0  | 1.0  | LYPLA1  |
| 11313  | 1.0  | 1.0  | 1.0  | 1.0  | LYPLA2  |
| 127018 | 1.0  | 1.0  | 1.0  | 1.0  | LYPLAL1 |
| 57149  | 1.0  | 1.0  | 1.0  | 3.6  | LYRM1   |
| 57128  | 1.0  | 2.8  | 1.0  | 1.0  | LYRM4   |
| 90624  | 66.4 | 1.0  | 1.0  | 1.0  | LYRM7   |
| 10894  | 1.0  | 1.0  | 1.0  | 1.0  | LYVE1   |
| 84328  | 1.0  | 1.0  | 1.0  | 1.0  | LZIC    |
| 11178  | 1.0  | 7.1  | 5.9  | 3.9  | LZTS1   |
| 4074   | 1.0  | 1.0  | 1.0  | 1.0  | M6PR    |
| 4081   | 1.9  | 1.0  | 1.0  | 1.0  | MAB21L1 |
| 23499  | -3.6 | -5.0 | -5.0 | 1.0  | MACF1   |
| 140733 | -6.4 | 1.0  | 1.0  | 1.0  | MACROD2 |
| 8379   | 1.5  | 1.0  | 1.0  | 1.0  | MAD1L1  |

|        |       |      |      |      |          |
|--------|-------|------|------|------|----------|
| 10459  | 1.9   | 1.0  | 1.0  | 1.0  | MAD2L2   |
| 8567   | 3.0   | -2.9 | 1.0  | 1.0  | MADD     |
| 84944  | 1.0   | 1.0  | 2.3  | 2.3  | MAEL     |
| 389692 | -3.0  | 1.0  | 1.0  | 1.0  | MAFA     |
| 9935   | 1.0   | -7.6 | 1.0  | 1.0  | MAFB     |
| 23764  | 1.0   | 1.0  | 1.0  | 1.0  | MAFF     |
| 727764 | 1.6   | 1.0  | 1.0  | 1.0  | MAFIP    |
| 7975   | 1.0   | 1.0  | 1.0  | 1.0  | MAFK     |
| 4110   | -3.5  | -2.3 | -1.8 | 1.0  | MAGEA11  |
| 4111   | 1.0   | 1.0  | 1.0  | 1.0  | MAGEA12  |
| 266740 | 8.3   | 1.0  | 16.5 | 1.0  | MAGEA2B  |
| 4107   | 1.0   | 1.0  | 2.9  | 1.0  | MAGEA8   |
| 4112   | 1.0   | 1.0  | -3.0 | 1.0  | MAGEB1   |
| 9947   | 1.0   | 1.0  | 1.0  | 1.0  | MAGEC1   |
| 51438  | 1.0   | 1.0  | 1.0  | 1.0  | MAGEC2   |
| 9500   | 3.3   | 1.0  | 1.0  | 1.0  | MAGED1   |
| 57692  | 3.5   | 1.0  | 1.0  | 1.0  | MAGEE1   |
| 139599 | 1.0   | 1.0  | 1.0  | 1.0  | MAGEE2   |
| 54551  | 1.0   | 1.0  | 5.4  | 7.9  | MAGEL2   |
| 9863   | 1.0   | 1.0  | 1.0  | 1.0  | MAGI2    |
| 260425 | 1.0   | 1.0  | 1.0  | 1.0  | MAGI3    |
| 79917  | 1.0   | 1.0  | 1.0  | 1.0  | MAGIX    |
| 84061  | -1.5  | -5.4 | -5.5 | -5.3 | MAGT1    |
| 4117   | 1.0   | 1.0  | 4.8  | 1.0  | MAK      |
| 4118   | 1.0   | 4.1  | 1.0  | 1.9  | MAL      |
| 7851   | 1.0   | -3.9 | -3.8 | 1.0  | MALL     |
| 10892  | -13.3 | 1.0  | 1.0  | 1.0  | MALT1    |
| 9794   | 1.0   | 1.0  | 1.0  | 1.0  | MAML1    |
| 55534  | 1.0   | 1.0  | -4.3 | 1.0  | MAML3    |
| 10046  | 1.0   | 1.0  | 2.6  | 1.0  | MAMLD1   |
| 284358 | 1.0   | 1.0  | 1.0  | 1.0  | MAMSTR   |
| 10905  | 1.6   | 1.0  | 4.8  | 1.0  | MAN1A2   |
| 11253  | 1.0   | 1.0  | 1.0  | 1.0  | MAN1B1   |
| 57134  | 1.0   | 1.0  | 1.0  | 1.0  | MAN1C1   |
| 4122   | -4.3  | 1.0  | 1.0  | 1.0  | MAN2A2   |
| 23324  | 1.0   | -5.8 | 1.0  | 1.0  | MAN2B2   |
| 4126   | -14.1 | 1.0  | 1.0  | 1.0  | MANBA    |
| 63905  | 1.0   | 1.0  | 1.0  | 1.0  | MANBAL   |
| 149175 | 1.0   | 1.0  | 1.0  | 1.0  | MANEAL   |
| 4129   | 1.0   | 4.6  | 4.3  | 1.0  | MAOB     |
| 81631  | 1.0   | 1.0  | 1.0  | 1.0  | MAP1LC3B |
| 5605   | 7.6   | 1.0  | 1.0  | 1.0  | MAP2K2   |
| 5608   | 1.0   | 1.0  | -2.5 | 1.0  | MAP2K6   |
| 4216   | -3.5  | 1.0  | 1.0  | 1.0  | MAP3K4   |
| 4217   | 1.0   | 1.0  | 1.0  | 1.0  | MAP3K5   |
| 9064   | 2.8   | 1.0  | 5.5  | 1.0  | MAP3K6   |
| 1326   | 1.0   | 1.0  | 1.0  | 1.0  | MAP3K8   |
| 4293   | 1.5   | 1.0  | -5.3 | 1.0  | MAP3K9   |

|           |      |      |      |      |            |
|-----------|------|------|------|------|------------|
| 4134      | 1.0  | 1.0  | 3.7  | 1.0  | MAP4       |
| 8491      | 1.0  | 1.7  | 6.2  | 1.0  | MAP4K3     |
| 79929     | 3.1  | 4.5  | 6.2  | 4.4  | MAP6D1     |
| 256714    | -2.4 | 1.0  | 1.0  | 1.0  | MAP7D2     |
| 79649     | 1.0  | 4.4  | -3.6 | 4.5  | MAP7D3     |
| 5600      | 1.0  | 1.0  | -5.5 | 1.0  | MAPK11     |
| 225689    | 1.7  | 1.0  | 1.0  | 1.0  | MAPK15     |
| 5595      | 1.0  | 1.0  | -2.3 | -2.2 | MAPK3      |
| 5599      | 1.0  | 1.0  | 1.0  | 1.0  | MAPK8      |
| 57787     | 1.0  | 1.0  | 1.0  | -3.1 | MARK4      |
| 4141      | 1.0  | 1.0  | 1.0  | 1.0  | MARS       |
| 153562    | 1.0  | 1.0  | 1.0  | 1.0  | MARVELD2   |
| 23139     | 1.0  | 1.0  | 1.0  | 1.0  | MAST2      |
| 84930     | 1.0  | 1.0  | 1.0  | 1.0  | MASTL      |
| 4143      | 1.0  | 2.1  | 1.0  | 1.0  | MAT1A      |
| 4144      | 1.0  | 1.0  | 1.0  | 1.0  | MAT2A      |
| 27430     | 1.0  | -5.7 | 1.0  | 1.0  | MAT2B      |
| 4146      | 1.7  | 1.0  | 1.0  | 1.0  | MATN1      |
| 4148      | 1.0  | -3.8 | -6.3 | 1.0  | MATN3      |
| 8785      | 1.0  | 3.3  | 1.0  | 1.0  | MATN4      |
| 23383     | 1.0  | 1.0  | 1.0  | 5.1  | MAU2       |
| 4149      | 1.0  | 3.0  | 3.0  | 1.0  | MAX        |
| 4152      | 1.0  | 2.5  | 1.0  | -1.7 | MBD1       |
| 8932      | 1.0  | 1.0  | 1.0  | 1.0  | MBD2       |
| 85509     | 1.0  | 1.0  | 1.0  | 1.0  | MBD3L1     |
| 55777     | 20.0 | 19.6 | 1.0  | 1.0  | MBD5       |
| 114785    | 1.6  | 1.0  | 1.0  | 1.0  | MBD6       |
| 51562     | 1.0  | 1.0  | 1.5  | 1.0  | MBIP       |
| 4154      | 1.0  | -2.7 | 1.0  | 1.0  | MBNL1      |
| 10150     | 1.0  | 1.0  | 1.0  | 1.0  | MBNL2      |
| 129642    | 1.0  | 1.0  | 1.0  | 1.0  | MBOAT2     |
| 79143     | 2.1  | 1.0  | 1.0  | 1.0  | MBOAT7     |
| 4155      | 1.0  | 1.0  | -4.3 | 1.0  | MBP        |
| 8720      | 1.0  | 1.0  | -5.2 | 1.0  | MBTPS1     |
| 4157      | -3.4 | -3.0 | 1.0  | 1.0  | MC1R       |
| 4159      | 1.0  | 1.0  | 1.0  | 1.0  | MC3R       |
| 4162      | 6.2  | 1.0  | 1.0  | 1.0  | MCAM       |
| 64087     | 1.0  | 1.0  | 1.0  | 1.0  | MCCC2      |
| 4168      | 1.0  | 1.0  | 1.0  | 1.0  | MCF2       |
| 23263     | 1.0  | -3.2 | -3.2 | 1.0  | MCF2L      |
| 100289410 | 1.0  | 1.0  | 1.0  | 1.0  | MCF2L-AS1  |
| 90411     | 1.0  | 1.6  | 1.0  | 1.0  | MCFD2      |
| 2847      | 1.0  | 1.0  | 4.3  | 4.6  | MCHR1      |
| 84539     | -1.6 | 1.0  | -3.8 | 1.0  | MCHR2      |
| 4170      | 1.0  | 1.0  | -6.0 | 1.0  | MCL1       |
| 4171      | 1.0  | 1.0  | 3.2  | 6.6  | MCM2       |
| 114044    | -1.7 | 1.0  | 1.0  | 4.3  | MCM3AP-AS1 |
| 4174      | 1.0  | 1.0  | 1.0  | 1.0  | MCM5       |

|        |      |      |      |      |          |
|--------|------|------|------|------|----------|
| 4175   | 1.0  | 1.0  | 1.0  | 1.0  | MCM6     |
| 55283  | 1.0  | 1.0  | -3.1 | 1.0  | MCOLN3   |
| 79772  | 1.0  | 1.0  | 1.0  | -6.3 | MCTP1    |
| 55784  | 1.0  | 1.0  | 1.0  | 1.0  | MCTP2    |
| 28985  | 1.0  | 1.0  | -5.6 | 1.0  | MCTS1    |
| 4190   | 1.0  | 1.0  | 1.0  | 1.0  | MDH1     |
| 130752 | 1.0  | 3.7  | 5.0  | 1.0  | MDH1B    |
| 4193   | 1.0  | 1.0  | 1.0  | 2.0  | MDM2     |
| 4194   | 1.0  | 1.0  | 1.0  | 1.0  | MDM4     |
| 259283 | 1.0  | 1.0  | 1.0  | 1.0  | MDS2     |
| 4200   | 1.0  | 1.0  | -3.7 | 1.0  | ME2      |
| 10873  | 1.0  | 1.0  | -2.7 | 1.0  | ME3      |
| 64769  | 1.0  | -3.0 | 1.0  | 1.0  | MEAF6    |
| 2122   | -4.6 | 1.0  | 1.0  | 1.0  | MECOM    |
| 4204   | 1.0  | 1.0  | 1.0  | 1.0  | MECP2    |
| 400569 | 1.0  | 1.0  | 1.0  | 1.0  | MED11    |
| 9968   | 1.0  | 1.0  | 1.0  | -3.8 | MED12    |
| 116931 | 1.0  | -6.2 | -5.9 | 1.0  | MED12L   |
| 9969   | -2.1 | 1.0  | 1.0  | 1.0  | MED13    |
| 23389  | 1.0  | 1.0  | 1.0  | 1.0  | MED13L   |
| 9440   | 1.0  | 1.0  | -9.9 | 1.0  | MED17    |
| 219541 | 1.0  | 1.0  | 1.0  | 1.0  | MED19    |
| 9439   | 1.0  | 1.0  | 1.0  | 1.0  | MED23    |
| 81857  | -2.8 | 1.0  | -2.3 | 1.0  | MED25    |
| 55588  | 1.0  | 1.0  | 1.0  | 1.0  | MED29    |
| 90390  | 1.0  | 1.0  | -3.4 | -2.8 | MED30    |
| 29079  | 1.0  | 1.0  | 3.0  | 1.0  | MED4     |
| 10001  | 1.0  | 1.0  | 1.0  | 1.0  | MED6     |
| 9443   | 1.0  | 1.0  | -6.6 | 1.0  | MED7     |
| 112950 | 1.0  | 1.0  | 1.0  | 1.0  | MED8     |
| 4205   | 1.8  | 1.0  | 1.0  | 1.0  | MEF2A    |
| 729991 | 1.7  | 1.0  | 3.3  | 1.0  | MEF2BNB  |
| 55384  | 1.0  | 1.0  | 1.0  | -1.9 | MEG3     |
| 84465  | 1.0  | 1.0  | 1.0  | 1.0  | MEGF11   |
| 4211   | -2.8 | -6.7 | 1.0  | -7.1 | MEIS1    |
| 51072  | 1.0  | 1.0  | 2.4  | 1.0  | MEMO1    |
| 56257  | 1.0  | 1.0  | -5.0 | 1.0  | MEPCE    |
| 56955  | -1.9 | -2.2 | 1.0  | 1.0  | MEPE     |
| 10461  | 1.0  | 1.0  | -6.8 | 1.0  | MERTK    |
| 4233   | 1.0  | 1.0  | 1.0  | 1.0  | MET      |
| 284207 | 1.0  | 1.0  | -4.3 | 1.0  | METRNL   |
| 4234   | 1.0  | 1.0  | -1.7 | 1.0  | METTLL1  |
| 399818 | 1.0  | 1.0  | 1.0  | -2.8 | METTLL10 |
| 51603  | 1.0  | 5.0  | 4.7  | 3.2  | METTLL13 |
| 57721  | 1.0  | 3.1  | 3.4  | 1.0  | METTLL14 |
| 196074 | 1.0  | -4.5 | 1.0  | 1.0  | METTLL15 |
| 64745  | 1.0  | 1.0  | 1.0  | 4.7  | METTLL17 |
| 254013 | 1.0  | 1.0  | 2.2  | 1.0  | METTLL20 |

|        |      |      |      |      |          |
|--------|------|------|------|------|----------|
| 151194 | 1.0  | -3.5 | 1.0  | 1.0  | METTL21A |
| 196541 | 1.0  | 1.0  | -1.6 | 1.0  | METTL21C |
| 124512 | 1.0  | 1.0  | 4.6  | 1.0  | METTL23  |
| 339175 | 1.0  | 1.0  | 1.0  | 1.0  | METTL2A  |
| 29081  | 3.6  | 1.0  | 1.0  | 1.0  | METTL5   |
| 131965 | 1.0  | 1.0  | 1.0  | 1.0  | METTL6   |
| 196410 | 1.0  | 2.8  | 1.0  | 1.0  | METTL7B  |
| 79828  | 1.0  | 1.0  | 4.4  | 1.0  | METTL8   |
| 51108  | 1.5  | -5.2 | -3.5 | -6.0 | METTL9   |
| 51320  | 1.0  | -5.1 | 1.0  | 1.0  | MEX3C    |
| 4238   | 1.0  | 2.2  | 1.0  | 1.0  | MFAP3    |
| 9848   | 1.0  | 1.0  | 4.5  | 1.0  | MFAP3L   |
| 9258   | 1.0  | 1.0  | 1.0  | 1.0  | MFHAS1   |
| 4242   | 1.0  | -1.9 | -1.8 | -1.8 | MFNG     |
| 64747  | 1.0  | 2.8  | 1.9  | 1.0  | MFSD1    |
| 113655 | 1.0  | 1.0  | 1.0  | -3.3 | MFSD3    |
| 23269  | 1.0  | 1.0  | -3.6 | -3.3 | MGA      |
| 8972   | 1.0  | 1.0  | 1.0  | 1.0  | MGAM     |
| 4245   | 1.0  | 1.0  | -3.3 | 1.0  | MGAT1    |
| 25834  | 1.0  | 1.0  | 1.0  | 1.0  | MGAT4C   |
| 4249   | 1.0  | 1.0  | 1.0  | 1.0  | MGAT5    |
| 84757  | 1.0  | 1.0  | 1.0  | 1.0  | MGC10814 |
| 84793  | 1.0  | 1.0  | 1.0  | 2.4  | MGC12982 |
| 113691 | 1.0  | -2.9 | -2.6 | 1.0  | MGC16703 |
| 389741 | 1.0  | 2.3  | 1.0  | 1.0  | MGC21881 |
| 196872 | 1.0  | 1.0  | 1.0  | 1.0  | MGC23270 |
| 197187 | 1.0  | 1.0  | 1.0  | 1.0  | MGC23284 |
| 158295 | 1.0  | 1.0  | 1.0  | 1.0  | MGC24103 |
| 157247 | 1.0  | 1.0  | 1.0  | 1.0  | MGC27345 |
| 154089 | 1.0  | 1.0  | 1.0  | 1.0  | MGC34034 |
| 414927 | 1.0  | 1.0  | 1.0  | 1.0  | MGC34796 |
| 403312 | 1.0  | 1.0  | 4.3  | 1.0  | MGC39545 |
| 79100  | 1.0  | 1.0  | 1.0  | -3.2 | MGC4473  |
| 79150  | 1.0  | 6.4  | 6.2  | 7.7  | MGC4859  |
| 399693 | 1.0  | 1.0  | 1.0  | 1.0  | MGC50722 |
| 401884 | 1.0  | -1.6 | 1.0  | 1.0  | MGC57346 |
| 11343  | 1.0  | 1.0  | 1.0  | 5.2  | MGLL     |
| 23295  | -4.5 | 1.0  | 1.0  | 1.0  | MGRN1    |
| 4259   | 1.0  | -2.7 | 1.0  | 1.0  | MGST3    |
| 8190   | 1.0  | 1.0  | 1.0  | 1.0  | MIA      |
| 117153 | 1.0  | 1.0  | 1.0  | 1.0  | MIA2     |
| 375056 | 1.0  | 1.0  | 1.0  | 1.0  | MIA3     |
| 57534  | 1.0  | 1.0  | 1.0  | 1.0  | MIB1     |
| 142678 | 2.7  | 1.0  | 1.0  | 1.0  | MIB2     |
| 64780  | 1.0  | -6.0 | 1.0  | 1.0  | MICAL1   |
| 84953  | 1.0  | 1.0  | 1.0  | 1.0  | MICALCL  |
| 85377  | 1.0  | 1.0  | 1.0  | 2.7  | MICALL1  |
| 4277   | 36.6 | 1.0  | 1.0  | 1.0  | MICB     |

|        |      |      |      |      |          |
|--------|------|------|------|------|----------|
| 10367  | 1.0  | 1.0  | -6.4 | 1.0  | MICU1    |
| 58526  | 3.0  | 1.0  | 1.0  | 1.0  | MID1IP1  |
| 11043  | 1.0  | 1.0  | 1.0  | 1.0  | MID2     |
| 90007  | 1.0  | 3.2  | 1.0  | 1.0  | MIDN     |
| 57708  | -2.4 | -4.4 | -4.8 | -4.8 | MIER1    |
| 166968 | 1.0  | 1.0  | 1.0  | 1.0  | MIER3    |
| 4282   | 1.0  | 1.0  | 1.0  | 1.0  | MIF      |
| 84864  | 1.0  | 1.0  | 1.0  | 1.0  | MINA     |
| 9562   | 1.6  | 1.0  | 3.5  | 3.6  | MINPP1   |
| 55586  | 1.9  | 1.0  | 1.0  | 1.0  | MIOX     |
| 145282 | 1.0  | 1.0  | -3.1 | 1.0  | MIPOL1   |
| 399959 | 1.0  | 1.0  | 1.0  | 2.7  | MIR100HG |
| 114614 | 1.0  | 1.0  | 1.0  | 1.0  | MIR155HG |
| 407975 | 1.0  | 1.0  | 1.0  | 1.0  | MIR17HG  |
| 54069  | 1.0  | 1.0  | 1.0  | 1.0  | MIS18A   |
| 4286   | -4.0 | 1.0  | -2.8 | 3.3  | MITF     |
| 83881  | 1.0  | 1.0  | 2.3  | 1.0  | MIXL1    |
| 57496  | 1.0  | 1.0  | 1.0  | 1.0  | MKL2     |
| 4289   | 1.0  | -7.6 | -7.2 | -8.4 | MKLN1    |
| 8569   | 1.0  | 3.8  | 1.0  | 3.4  | MKNK1    |
| 23608  | 1.8  | 1.0  | 1.0  | 1.0  | MKRN1    |
| 400058 | 1.0  | 1.0  | 1.0  | 1.0  | MKRN9P   |
| 54903  | 1.0  | 1.0  | 1.0  | 1.0  | MKS1     |
| 283078 | 3.2  | 1.0  | 1.0  | 1.0  | MKX      |
| 2315   | 1.0  | 1.0  | 6.4  | 1.0  | MLANA    |
| 8079   | 1.0  | 6.7  | 4.7  | 1.0  | MLF2     |
| 4292   | 1.0  | 1.0  | 1.0  | 1.0  | MLH1     |
| 27030  | 1.0  | 1.0  | 1.0  | 4.7  | MLH3     |
| 197259 | 1.0  | 1.0  | 1.0  | 1.0  | MLKL     |
| 4297   | 1.0  | 1.0  | 1.0  | 1.0  | MLL      |
| 55904  | 1.0  | 1.0  | 1.0  | 1.0  | MLL5     |
| 8028   | -1.8 | 1.0  | 1.0  | 1.0  | MLLT10   |
| 4301   | 1.0  | 1.0  | 1.0  | -3.7 | MLLT4    |
| 4302   | -2.1 | 1.0  | 2.5  | 1.0  | MLLT6    |
| 6945   | 1.0  | 1.0  | 1.0  | 1.0  | MLX      |
| 326625 | 1.0  | 1.0  | 1.0  | 1.0  | MMAB     |
| 23531  | 1.6  | -2.9 | 1.0  | 1.0  | MMD      |
| 221938 | 1.0  | 1.0  | 1.0  | 1.0  | MMD2     |
| 4312   | 1.0  | 1.0  | -2.4 | 1.0  | MMP1     |
| 4322   | 1.0  | 1.0  | -4.3 | 1.0  | MMP13    |
| 4323   | 1.0  | 1.0  | 3.5  | 1.0  | MMP14    |
| 4318   | 1.0  | 1.0  | 1.0  | 1.0  | MMP9     |
| 79812  | 1.0  | 1.0  | 1.5  | 1.0  | MMRN2    |
| 55329  | 1.0  | 1.0  | 1.0  | 1.0  | MNS1     |
| 4335   | 1.0  | 1.0  | 1.0  | 1.0  | MNT      |
| 55233  | 1.0  | 4.3  | 4.8  | 4.0  | MOB1A    |
| 92597  | -1.6 | -2.8 | -3.4 | -3.3 | MOB1B    |
| 4336   | 1.6  | 4.1  | 3.0  | 3.5  | MOBP     |

|        |       |      |       |      |          |
|--------|-------|------|-------|------|----------|
| 55034  | 1.0   | -3.0 | 1.0   | 1.0  | MOCOS    |
| 4337   | 1.0   | 1.0  | 1.0   | 1.0  | MOCS1    |
| 4340   | 1.0   | 1.0  | 4.6   | 1.0  | MOG      |
| 80168  | 1.0   | 1.0  | -2.0  | 1.0  | MOGAT2   |
| 7841   | 1.8   | 1.0  | 1.0   | 1.0  | MOGS     |
| 5891   | 1.0   | -2.7 | 2.8   | 1.0  | MOK      |
| 22879  | -4.3  | 1.0  | 1.0   | 2.9  | MON1B    |
| 23041  | 1.0   | 1.0  | 1.0   | 1.0  | MON2     |
| 79710  | 2.4   | 1.0  | -3.2  | 1.0  | MORC4    |
| 10933  | -1.9  | 1.0  | 1.0   | 1.0  | MORF4L1  |
| 9643   | 1.0   | 1.0  | 2.4   | 2.4  | MORF4L2  |
| 283385 | 1.0   | 2.7  | 1.0   | 2.7  | MORN3    |
| 4343   | 1.0   | 1.0  | 2.2   | 1.0  | MOV10    |
| 9526   | 1.0   | 3.4  | 4.8   | 5.8  | MPDU1    |
| 54737  | 1.0   | 7.1  | 3.3   | 3.1  | MPHOSPH8 |
| 4352   | 1.0   | 1.0  | 1.0   | 1.0  | MPL      |
| 4353   | 1.0   | 1.0  | 1.0   | 1.0  | MPO      |
| 4354   | 1.0   | 1.0  | 1.0   | 1.0  | MPP1     |
| 4355   | 1.0   | 1.0  | 1.0   | 1.0  | MPP2     |
| 4356   | 1.0   | 5.4  | 1.0   | 1.0  | MPP3     |
| 64398  | 1.0   | 1.0  | 1.0   | 2.5  | MPP5     |
| 65258  | 1.0   | 1.0  | -2.9  | 1.0  | MPPE1    |
| 23164  | 1.0   | 1.0  | 1.0   | 2.3  | MPRIP    |
| 4357   | 1.0   | 1.0  | 1.0   | 1.0  | MPST     |
| 4358   | 1.0   | 1.0  | 1.0   | 1.0  | MPV17    |
| 255027 | 1.0   | 1.0  | 2.4   | 1.0  | MPV17L   |
| 4359   | -8.9  | -3.8 | -10.5 | -4.9 | MPZ      |
| 9019   | -1.8  | 1.0  | 1.0   | 1.0  | MPZL1    |
| 196264 | 1.0   | 1.0  | 1.0   | -3.1 | MPZL3    |
| 4360   | 1.0   | 6.1  | 1.0   | 5.9  | MRC1     |
| 4361   | 1.0   | 1.0  | 4.6   | 1.0  | MRE11A   |
| 116535 | 1.0   | 1.0  | 1.0   | 1.0  | MRGPRF   |
| 259249 | 1.0   | 2.6  | 1.0   | 1.0  | MRGPRX1  |
| 117195 | 1.0   | 2.7  | 1.0   | 1.0  | MRGPRX3  |
| 117196 | 1.0   | 1.0  | 1.0   | 1.0  | MRGPRX4  |
| 79922  | -2.8  | 3.1  | 1.0   | 4.1  | MRM1     |
| 78988  | 1.0   | 1.0  | 1.0   | 1.0  | MRP63    |
| 124995 | 1.0   | 3.1  | 3.7   | 2.5  | MRPL10   |
| 6182   | 2.6   | -2.9 | -2.8  | 1.0  | MRPL12   |
| 54948  | 4.3   | 1.0  | 2.6   | 1.0  | MRPL16   |
| 63875  | 1.0   | -2.7 | 1.0   | 1.0  | MRPL17   |
| 9801   | -48.0 | 1.0  | 1.0   | 1.0  | MRPL19   |
| 219927 | 1.0   | -3.6 | -3.5  | -3.4 | MRPL21   |
| 6150   | 1.0   | 1.0  | 1.0   | 1.0  | MRPL23   |
| 79590  | 1.0   | 1.0  | -1.7  | 1.0  | MRPL24   |
| 51264  | 1.0   | 1.0  | 1.0   | 2.0  | MRPL27   |
| 64983  | 1.0   | -2.1 | -2.2  | 1.0  | MRPL32   |
| 9553   | 1.0   | 1.0  | 1.0   | 1.0  | MRPL33   |

|        |      |      |      |      |         |
|--------|------|------|------|------|---------|
| 64981  | 1.0  | 2.6  | 1.0  | 1.0  | MRPL34  |
| 51073  | 1.0  | 3.0  | 2.6  | 1.0  | MRPL4   |
| 64976  | 1.0  | 1.0  | 1.0  | 1.0  | MRPL40  |
| 28977  | -1.5 | 1.0  | 1.0  | 1.0  | MRPL42  |
| 84545  | 1.0  | 1.0  | 1.0  | 2.2  | MRPL43  |
| 26589  | 1.0  | 1.0  | 1.0  | 2.2  | MRPL46  |
| 122704 | 1.0  | -2.6 | 1.0  | 1.0  | MRPL52  |
| 116540 | 1.9  | 1.0  | 1.0  | 1.0  | MRPL53  |
| 65005  | 1.0  | 3.0  | 1.0  | 1.0  | MRPL9   |
| 64963  | 3.6  | 1.0  | 1.0  | 1.0  | MRPS11  |
| 6183   | -1.6 | 1.0  | 1.0  | 1.0  | MRPS12  |
| 51021  | 1.0  | 2.5  | 2.5  | 6.3  | MRPS16  |
| 28973  | 1.0  | 2.3  | 1.0  | 1.0  | MRPS18B |
| 56945  | 2.4  | 1.0  | -4.4 | -4.2 | MRPS22  |
| 64951  | 1.0  | 1.0  | 1.0  | 1.0  | MRPS24  |
| 64432  | 1.0  | 1.0  | -6.0 | 1.0  | MRPS25  |
| 23107  | 1.0  | 4.7  | 4.1  | 1.0  | MRPS27  |
| 28957  | 1.0  | -4.5 | 1.0  | 1.0  | MRPS28  |
| 10884  | 1.0  | 1.0  | -6.5 | 1.0  | MRPS30  |
| 10240  | 1.9  | 1.0  | 1.0  | 1.0  | MRPS31  |
| 65993  | 1.0  | 1.0  | 1.0  | 1.0  | MRPS34  |
| 92259  | 1.0  | -4.3 | -4.6 | -6.2 | MRPS36  |
| 64969  | 1.0  | 1.0  | 3.2  | 1.0  | MRPS5   |
| 51081  | 1.0  | 1.0  | -3.7 | 1.0  | MRPS7   |
| 92399  | 1.0  | 1.0  | 1.0  | 1.0  | MRRF    |
| 10335  | 1.0  | 1.0  | 1.0  | -4.0 | MRVI1   |
| 931    | 1.0  | 1.0  | 1.0  | 1.0  | MS4A1   |
| 54860  | 1.0  | 5.6  | 3.4  | 1.0  | MS4A12  |
| 84689  | 1.0  | 1.0  | 1.0  | 1.0  | MS4A14  |
| 2206   | -3.1 | 1.0  | -5.2 | 1.0  | MS4A2   |
| 51338  | 1.0  | -3.6 | -3.4 | -4.1 | MS4A4A  |
| 64231  | 1.0  | 1.0  | 4.4  | 1.0  | MS4A6A  |
| 58475  | 1.0  | 1.0  | 1.0  | 1.0  | MS4A7   |
| 4436   | 1.0  | 1.0  | -5.6 | 1.0  | MSH2    |
| 4437   | 1.9  | 1.0  | -3.0 | -2.6 | MSH3    |
| 124540 | 1.0  | 2.6  | 5.0  | 3.0  | MSI2    |
| 339287 | 1.0  | 2.4  | 1.0  | 1.0  | MSL1    |
| 10232  | 1.0  | 1.0  | 1.0  | 1.0  | MSLN    |
| 6307   | 1.0  | 1.0  | 1.0  | -2.3 | MSMO1   |
| 4478   | 1.0  | 1.0  | 3.1  | 1.0  | MSN     |
| 55154  | 1.0  | -9.7 | -4.8 | -8.1 | MSTO1   |
| 4487   | 1.0  | 1.0  | 1.0  | -2.4 | MSX1    |
| 4488   | 1.0  | 1.0  | 1.0  | 1.0  | MSX2    |
| 4493   | 1.9  | -1.6 | 1.0  | 1.0  | MT1E    |
| 4502   | 1.0  | 1.0  | 1.0  | 1.0  | MT2A    |
| 84560  | 1.0  | 1.0  | -8.0 | 1.0  | MT4     |
| 9219   | 1.0  | 1.0  | 1.0  | 1.0  | MTA2    |
| 57504  | 1.0  | 1.0  | 1.0  | 1.0  | MTA3    |



|           |      |      |      |      |         |
|-----------|------|------|------|------|---------|
| 4507      | 1.0  | -2.6 | 1.0  | 1.0  | MTAP    |
| 23788     | 1.0  | -3.0 | 1.0  | 1.0  | MTCH2   |
| 4515      | 1.5  | 1.0  | 1.0  | 1.0  | MTCP1   |
| 92140     | 1.0  | 1.0  | 1.0  | 1.0  | MTDH    |
| 130916    | 1.0  | 1.0  | 1.0  | 1.0  | MTERFD2 |
| 92170     | 1.0  | 1.0  | 1.0  | 5.1  | MTG1    |
| 4522      | 1.0  | -3.2 | -3.2 | -3.2 | MTHFD1  |
| 25902     | 1.0  | 1.0  | 2.5  | 1.0  | MTHFD1L |
| 441024    | 1.0  | 1.0  | 1.0  | 1.0  | MTHFD2L |
| 54893     | 1.0  | 2.4  | 2.3  | 1.0  | MTMR10  |
| 64419     | 1.0  | -3.4 | -2.8 | 1.0  | MTMR14  |
| 8898      | 1.0  | 1.0  | 1.0  | 1.0  | MTMR2   |
| 9107      | 5.1  | -4.2 | 1.0  | 1.0  | MTMR6   |
| 9108      | 1.0  | 1.0  | 1.0  | 1.0  | MTMR7   |
| 2475      | 1.0  | 1.0  | 1.0  | 1.0  | MTOR    |
| 10651     | 2.0  | 1.0  | 1.0  | 1.0  | MTX2    |
| 4582      | -3.9 | 1.0  | 1.0  | 1.0  | MUC1    |
| 10071     | -1.6 | 1.0  | -3.2 | 1.0  | MUC12   |
| 94025     | 1.0  | 1.0  | 1.0  | 1.0  | MUC16   |
| 140453    | 1.0  | -2.8 | -3.0 | -3.0 | MUC17   |
| 100133790 | 1.0  | 1.0  | 4.6  | 1.0  | MUC3    |
| 4584      | 1.0  | 1.6  | -3.9 | 2.8  | MUC3A   |
| 4585      | 2.0  | 1.0  | 1.0  | 1.0  | MUC4    |
| 727897    | 1.0  | 1.0  | 1.0  | 1.0  | MUC5B   |
| 4588      | 1.0  | 1.0  | -3.2 | 1.0  | MUC6    |
| 4589      | 1.0  | 1.0  | 1.0  | -2.1 | MUC7    |
| 118430    | 1.0  | 1.0  | 1.0  | 1.0  | MUCL1   |
| 55745     | 1.0  | 1.0  | -6.5 | 1.0  | MUDENG  |
| 4597      | -5.0 | 1.0  | 1.0  | 1.0  | MVD     |
| 9961      | 1.7  | 1.0  | 1.0  | 1.0  | MVP     |
| 4599      | 1.0  | 1.0  | 1.0  | 1.0  | MX1     |
| 4084      | 1.0  | 1.0  | 1.0  | 1.0  | MXD1    |
| 83463     | 2.4  | 1.0  | -4.3 | 1.0  | MXD3    |
| 10608     | -1.6 | 1.0  | 1.0  | -2.6 | MXD4    |
| 4601      | 1.0  | 14.7 | 5.1  | -4.5 | MXI1    |
| 439921    | 1.7  | 1.0  | 1.0  | 1.0  | MXRA7   |
| 91663     | 1.0  | 2.6  | 1.0  | 1.0  | MYADM   |
| 4602      | 1.0  | 1.0  | 1.0  | 1.0  | MYB     |
| 4604      | 1.0  | 1.0  | -6.2 | 1.0  | MYBPC1  |
| 4607      | 1.0  | 1.0  | 1.0  | 1.0  | MYBPC3  |
| 4609      | -4.1 | -2.6 | 1.0  | 1.0  | MYC     |
| 23077     | 1.0  | -3.6 | -3.3 | 1.0  | MYCBP2  |
| 84073     | 1.0  | 1.0  | 1.0  | 1.0  | MYCBPAP |
| 4610      | 1.0  | 2.8  | 1.0  | 1.0  | MYCL1   |
| 10408     | 1.0  | 1.0  | -2.9 | 1.0  | MYCNOS  |
| 4615      | 1.0  | 1.0  | 1.7  | 1.0  | MYD88   |
| 4618      | 1.0  | 1.0  | 5.1  | 1.0  | MYF6    |
| 4628      | -5.7 | -6.8 | 1.0  | 1.0  | MYH10   |

|           |      |      |      |      |         |
|-----------|------|------|------|------|---------|
| 79784     | -2.5 | 1.0  | -2.0 | 1.0  | MYH14   |
| 4622      | 1.0  | 1.0  | -3.6 | 1.0  | MYH4    |
| 57644     | 1.0  | 1.0  | -3.8 | 1.0  | MYH7B   |
| 4627      | 1.0  | 1.0  | 1.0  | 1.0  | MYH9    |
| 4635      | 1.0  | -2.7 | -2.8 | 1.0  | MYL4    |
| 140465    | 3.1  | 3.8  | 1.0  | 1.0  | MYL6B   |
| 58498     | 1.0  | 1.0  | 1.0  | 1.0  | MYL7    |
| 10398     | 1.0  | 1.0  | 1.0  | 1.0  | MYL9    |
| 29116     | 1.0  | -2.7 | 1.0  | 1.0  | MYLIP   |
| 4638      | 1.0  | 1.0  | -5.5 | 1.0  | MYLK    |
| 91807     | -1.6 | 1.0  | 5.7  | 1.0  | MYLK3   |
| 55892     | 1.0  | 1.0  | -3.2 | -3.2 | MYNN    |
| 4651      | 1.0  | 1.0  | 1.0  | 3.3  | MYO10   |
| 399687    | 1.0  | 1.0  | 1.0  | 1.0  | MYO18A  |
| 4640      | -4.4 | 1.0  | 3.4  | 4.3  | MYO1A   |
| 4430      | -8.0 | 1.0  | -2.8 | 1.0  | MYO1B   |
| 4641      | -2.1 | -2.5 | 1.0  | 1.0  | MYO1C   |
| 4542      | 1.0  | 1.0  | 1.0  | 1.0  | MYO1F   |
| 53904     | 1.0  | 2.3  | 2.2  | 1.0  | MYO3A   |
| 4644      | 1.0  | 1.0  | 4.6  | 1.0  | MYO5A   |
| 4645      | 1.0  | 1.0  | 1.0  | 1.0  | MYO5B   |
| 55930     | 1.0  | 1.0  | 4.1  | 1.0  | MYO5C   |
| 4647      | 1.0  | 1.0  | 1.0  | 1.0  | MYO7A   |
| 4648      | 1.0  | 1.0  | 1.0  | 1.0  | MYO7B   |
| 4650      | 1.0  | 2.7  | 2.6  | 1.0  | MYO9B   |
| 4654      | -1.8 | 1.0  | 1.0  | 1.0  | MYOD1   |
| 26509     | 1.0  | 1.0  | 1.0  | -4.5 | MYOF    |
| 8736      | -1.5 | 1.0  | 1.0  | 1.0  | MYOM1   |
| 84665     | 1.0  | -1.9 | -3.5 | -1.9 | MYPN    |
| 339344    | 1.7  | 1.0  | -6.3 | 1.0  | MYPOP   |
| 25924     | 1.0  | 1.0  | 1.0  | 1.0  | MYRIP   |
| 4661      | 1.0  | 1.0  | 1.0  | 1.0  | MYT1    |
| 100820829 | 1.0  | 1.0  | 1.0  | 1.0  | MYZAP   |
| 51237     | 1.0  | 1.0  | 1.0  | 1.0  | MZB1    |
| 80097     | 1.5  | 1.0  | 1.0  | 1.0  | MZT2B   |
| 9683      | 1.0  | 1.0  | -3.2 | 1.0  | N4BP1   |
| 90634     | 1.0  | 1.0  | 1.0  | 1.0  | N4BP2L1 |
| 29104     | -3.3 | 1.0  | 1.0  | 1.0  | N6AMT1  |
| 8260      | 1.0  | -2.9 | 1.0  | 1.0  | NAA10   |
| 51126     | 1.0  | 1.0  | 1.0  | 1.0  | NAA20   |
| 122830    | 1.0  | 4.5  | 5.0  | 4.7  | NAA30   |
| 79829     | -3.3 | 1.0  | -4.2 | 1.0  | NAA40   |
| 80218     | 1.0  | 1.0  | 1.0  | -2.6 | NAA50   |
| 10003     | 1.0  | 1.0  | -5.1 | 1.0  | NAALAD2 |
| 4665      | 1.5  | 1.0  | 1.0  | 1.0  | NAB2    |
| 23148     | 1.0  | 1.0  | 1.0  | 1.0  | NACAD   |
| 138151    | 1.0  | 1.0  | -2.8 | 1.0  | NACC2   |
| 4668      | 1.0  | 1.0  | 1.0  | 1.0  | NAGA    |

|           |      |      |      |      |         |
|-----------|------|------|------|------|---------|
| 55577     | 1.0  | -3.3 | -2.9 | -2.8 | NAGK    |
| 51172     | 6.4  | 1.0  | 1.0  | 1.0  | NAGPA   |
| 259232    | 1.0  | 1.0  | 1.0  | 1.0  | NALCN   |
| 10135     | 1.0  | 1.0  | 1.0  | 1.0  | NAMPT   |
| 342977    | 1.0  | 1.0  | 1.7  | 1.0  | NANOS3  |
| 4673      | 1.0  | 1.0  | 3.2  | 1.0  | NAP1L1  |
| 63908     | 1.0  | 1.0  | 1.0  | -4.1 | NAPB    |
| 222236    | 8.0  | 1.0  | 1.0  | 1.0  | NAPEPLD |
| 8774      | 1.0  | 1.0  | 1.0  | 1.0  | NAPG    |
| 9476      | 1.0  | 1.0  | 1.0  | 1.0  | NAPSA   |
| 4678      | 1.0  | 1.0  | 1.0  | 2.0  | NASP    |
| 24142     | 1.0  | 1.0  | -3.8 | 1.0  | NAT6    |
| 9027      | 1.0  | 1.0  | 5.5  | 1.0  | NAT8    |
| 51471     | 1.0  | 1.0  | 1.0  | 1.0  | NAT8B   |
| 89796     | 1.0  | 1.0  | -6.2 | 1.0  | NAV1    |
| 89797     | -1.6 | 1.0  | 1.8  | 1.0  | NAV2    |
| 89795     | 1.0  | 1.0  | 1.0  | 2.8  | NAV3    |
| 65065     | 1.0  | 1.0  | 1.0  | 1.0  | NBEAL1  |
| 23218     | 1.0  | 1.0  | 1.0  | 1.0  | NBEAL2  |
| 100132406 | 1.0  | 1.0  | 1.0  | 4.4  | NBPF10  |
| 25832     | 1.0  | 3.2  | 8.1  | 1.0  | NBPF14  |
| 4077      | 1.0  | 1.0  | 1.0  | 3.4  | NBR1    |
| 10230     | 1.0  | 1.0  | -3.3 | 1.0  | NBR2    |
| 4685      | 1.0  | 1.0  | 1.0  | 1.0  | NCAM2   |
| 1463      | 1.0  | 1.9  | 1.0  | 1.0  | NCAN    |
| 9918      | 1.0  | 1.0  | 1.0  | 1.0  | NCAPD2  |
| 23397     | 1.0  | 1.0  | 1.0  | 1.0  | NCAPH   |
| 29781     | 5.0  | 1.0  | -3.0 | 1.0  | NCAPH2  |
| 653361    | 1.7  | 1.0  | 1.0  | 1.0  | NCF1    |
| 4690      | 1.0  | 1.0  | 1.0  | 1.0  | NCK1    |
| 8440      | 1.0  | -4.9 | -5.4 | 1.0  | NCK2    |
| 3071      | 1.0  | -4.2 | 1.0  | 1.0  | NCKAP1L |
| 57701     | 1.0  | 1.0  | 1.0  | 1.0  | NCKAP5L |
| 56926     | 1.0  | 3.8  | 1.0  | 1.8  | NCLN    |
| 8648      | 1.0  | 1.0  | -7.5 | 1.0  | NCOA1   |
| 10499     | 1.0  | -4.4 | 1.0  | 1.0  | NCOA2   |
| 8202      | 1.0  | 1.0  | 3.0  | 1.0  | NCOA3   |
| 57727     | 1.0  | 1.0  | 2.8  | 1.0  | NCOA5   |
| 23054     | 1.0  | 1.0  | 1.0  | 1.0  | NCOA6   |
| 9437      | 1.0  | 1.0  | 1.0  | 1.0  | NCR1    |
| 9436      | 1.0  | 1.0  | 1.0  | -3.5 | NCR2    |
| 23413     | 1.0  | 1.0  | 1.0  | 1.0  | NCS1    |
| 10403     | 1.0  | 1.0  | 1.0  | 1.0  | NDC80   |
| 81565     | 1.0  | 1.0  | 1.0  | 1.0  | NDEL1   |
| 27158     | 2.0  | -5.6 | 1.0  | 1.0  | NDOR1   |
| 10397     | 2.0  | 5.8  | 1.0  | 1.0  | NDRG1   |
| 57447     | 2.8  | 3.4  | 1.0  | 1.0  | NDRG2   |
| 8509      | 1.0  | 3.3  | 5.1  | 1.0  | NDST2   |

|        |       |      |      |      |         |
|--------|-------|------|------|------|---------|
| 64579  | 1.0   | 2.4  | 1.0  | 1.0  | NDST4   |
| 126328 | 1.0   | 1.0  | 1.0  | 1.0  | NDUFA11 |
| 4695   | 1.0   | 1.0  | -2.7 | 1.0  | NDUFA2  |
| 51103  | 1.0   | 1.0  | 1.0  | 1.0  | NDUFAF1 |
| 4707   | 1.0   | 1.0  | 1.0  | 1.0  | NDUFB1  |
| 4718   | 1.0   | 1.0  | 2.7  | 1.0  | NDUFC2  |
| 4724   | 1.7   | 1.0  | 1.0  | 1.0  | NDUFS4  |
| 4726   | 1.0   | 1.0  | -2.8 | 1.0  | NDUFS6  |
| 374291 | 1.0   | 1.0  | 1.0  | -2.6 | NDUFS7  |
| 4703   | 1.0   | 1.0  | -1.8 | 1.0  | NEB     |
| 25977  | 1.6   | 2.6  | 2.1  | 1.0  | NECAP1  |
| 121441 | 1.0   | 1.0  | 3.1  | 1.0  | NEDD1   |
| 4734   | 1.0   | 1.0  | 1.0  | 1.0  | NEDD4   |
| 4744   | 1.0   | -4.5 | -5.9 | -4.0 | NEFH    |
| 4750   | -4.3  | 1.0  | 1.0  | 1.0  | NEK1    |
| 6787   | 1.0   | 1.0  | 1.0  | 1.0  | NEK4    |
| 140609 | 1.0   | 3.3  | 1.0  | 3.9  | NEK7    |
| 26012  | 1.0   | 2.3  | 1.0  | 1.0  | NELF    |
| 4753   | 1.0   | -2.4 | 1.0  | -2.4 | NELL2   |
| 4756   | 1.0   | 2.8  | 2.3  | 1.0  | NEO1    |
| 81832  | -56.0 | 1.0  | 1.0  | 1.0  | NETO1   |
| 81831  | 1.0   | 3.1  | 3.1  | 2.9  | NETO2   |
| 4759   | 1.0   | 1.0  | 6.1  | 1.0  | NEU2    |
| 10825  | 1.0   | 1.0  | 1.0  | 1.0  | NEU3    |
| 54492  | 1.0   | 3.8  | 1.0  | 4.7  | NEURL1B |
| 93082  | 1.0   | 1.0  | 1.0  | 1.0  | NEURL3  |
| 4763   | 1.7   | -7.3 | 1.0  | 1.0  | NF1     |
| 4771   | 1.0   | -6.8 | 1.0  | 1.0  | NF2     |
| 23114  | -5.3  | 1.0  | 4.9  | 1.0  | NFASC   |
| 4772   | 1.0   | 1.6  | 1.0  | 1.0  | NFATC1  |
| 4773   | 3.1   | 12.5 | 1.0  | 1.0  | NFATC2  |
| 4776   | 3.9   | 1.0  | -3.8 | -2.6 | NFATC4  |
| 4780   | 1.0   | 1.0  | 1.0  | -3.2 | NFE2L2  |
| 58160  | 1.0   | 1.0  | -2.7 | -2.8 | NFE4    |
| 4781   | 1.0   | -4.7 | -6.9 | -3.7 | NFIB    |
| 4792   | 1.0   | 1.0  | 1.0  | 1.0  | NFKBIA  |
| 27247  | 1.0   | 1.0  | 1.0  | 1.0  | NFU1    |
| 4800   | 1.0   | 1.0  | -3.7 | 1.0  | NFYA    |
| 25791  | 1.0   | 3.4  | 3.2  | 3.1  | NGEF    |
| 27018  | 1.0   | 1.0  | 1.0  | 1.0  | NGFRAP1 |
| 55768  | 1.0   | 1.0  | 1.0  | 1.0  | NGLY1   |
| 4808   | 1.0   | 1.0  | 1.0  | 1.0  | NHLH2   |
| 374354 | 3.1   | 1.0  | -3.0 | 1.0  | NHLRC2  |
| 283948 | 1.0   | 1.0  | 1.0  | 1.0  | NHLRC4  |
| 57224  | 1.0   | 1.0  | -2.8 | 1.0  | NHSL1   |
| 84276  | 1.0   | 1.0  | 1.0  | 1.0  | NICN1   |
| 4811   | 1.0   | 1.0  | 1.0  | 1.0  | NID1    |
| 22795  | 1.7   | 1.0  | 1.0  | 3.8  | NID2    |

|        |      |      |      |      |           |
|--------|------|------|------|------|-----------|
| 60491  | 1.0  | 1.0  | 1.0  | 4.7  | NIF3L1    |
| 167359 | 1.0  | 1.0  | 1.0  | 1.0  | NIM1      |
| 22981  | 1.0  | 1.0  | 1.0  | 1.0  | NINL      |
| 8508   | 1.0  | 1.0  | 1.0  | 1.0  | NIPSNAP1  |
| 55335  | 1.0  | 1.0  | -4.0 | 1.0  | NIPSNAP3B |
| 11188  | 1.0  | 1.0  | 2.4  | 2.4  | NISCH     |
| 4817   | 1.0  | 1.0  | 1.0  | 1.0  | NIT1      |
| 79570  | -1.8 | 1.0  | 1.0  | 1.0  | NKAIN1    |
| 154215 | 1.0  | 1.0  | 1.0  | 1.0  | NKAIN2    |
| 286183 | 1.0  | 1.0  | 1.0  | 1.0  | NKAIN3    |
| 158801 | 1.0  | 1.0  | 1.0  | 4.8  | NKAPP1    |
| 85409  | 1.0  | 4.5  | 3.9  | 1.0  | NKD2      |
| 7080   | 1.0  | 1.0  | 2.6  | 1.0  | NKX2-1    |
| 26257  | 4.6  | 1.0  | 1.0  | 1.0  | NKX2-8    |
| 4824   | 1.0  | 1.0  | 1.0  | 1.0  | NKX3-1    |
| 157848 | 1.0  | 1.0  | 1.0  | 1.0  | NKX6-3    |
| 54475  | 1.0  | -3.2 | 1.0  | 1.0  | NLE1      |
| 57502  | 1.0  | 1.0  | 1.0  | 1.0  | NLGN4X    |
| 197358 | 1.0  | 1.0  | 1.0  | 1.0  | NLRC3     |
| 58484  | 1.0  | 1.0  | 2.9  | 1.0  | NLRC4     |
| 84166  | 1.0  | 5.1  | 1.0  | 1.0  | NLRC5     |
| 22861  | 1.0  | 1.0  | 3.2  | 1.0  | NLRP1     |
| 338323 | 1.0  | 1.0  | 1.0  | 1.0  | NLRP14    |
| 55655  | 1.0  | 1.0  | 1.0  | 1.0  | NLRP2     |
| 126206 | 1.0  | 1.0  | 1.0  | 1.0  | NLRP5     |
| 4828   | 1.0  | 1.0  | 1.0  | 1.0  | NMB       |
| 4829   | 1.0  | 1.0  | 1.0  | 1.0  | NMBR      |
| 347736 | 1.5  | 1.0  | 1.0  | 2.8  | NME9      |
| 9111   | 1.0  | 1.0  | 1.0  | 1.0  | NMI       |
| 64802  | 1.0  | 1.0  | -8.8 | -7.4 | NMNAT1    |
| 23530  | 2.7  | 1.0  | -6.0 | 1.0  | NNT       |
| 28987  | 1.0  | 1.0  | 1.0  | 1.0  | NOB1      |
| 26155  | 1.0  | 1.0  | 1.0  | 2.4  | NOC2L     |
| 4838   | 1.0  | 1.0  | 1.0  | 1.0  | NODAL     |
| 79954  | 1.0  | 1.0  | 1.0  | -3.5 | NOL10     |
| 25926  | 1.8  | 1.0  | 1.0  | 1.0  | NOL11     |
| 8715   | -9.0 | 1.0  | 1.0  | 1.0  | NOL4      |
| 51406  | 1.0  | 1.0  | 1.0  | 2.9  | NOL7      |
| 55035  | 1.0  | 1.0  | 1.0  | 1.0  | NOL8      |
| 64434  | 1.0  | -4.0 | -4.4 | 1.0  | NOM1      |
| 8602   | 1.0  | 4.2  | 1.0  | 3.6  | NOP14     |
| 51491  | 2.6  | 1.0  | 1.0  | 1.0  | NOP16     |
| 10528  | 1.0  | 1.0  | 3.1  | 1.0  | NOP56     |
| 4842   | 1.0  | 1.0  | 1.0  | 1.0  | NOS1      |
| 9722   | 1.0  | 1.0  | 1.0  | 1.0  | NOS1AP    |
| 51070  | 1.0  | 1.0  | 1.0  | 1.0  | NOSIP     |
| 115677 | 1.0  | 1.0  | 1.0  | 2.4  | NOSTRIN   |
| 4855   | 1.0  | 1.0  | 1.0  | 1.0  | NOTCH4    |

|        |       |       |       |      |         |
|--------|-------|-------|-------|------|---------|
| 4856   | 2.0   | 1.0   | -3.0  | 1.0  | NOV     |
| 27035  | -10.2 | 1.0   | 1.0   | 1.0  | NOX1    |
| 10811  | 2.8   | 1.0   | 1.0   | 1.0  | NOXA1   |
| 124056 | 1.0   | 1.0   | 4.3   | 2.2  | NOXO1   |
| 122945 | -3.2  | 1.0   | -3.3  | 1.0  | NOXRED1 |
| 64067  | 3.7   | 1.0   | -5.6  | -6.0 | NPAS3   |
| 10577  | 1.0   | 2.4   | 1.0   | 1.0  | NPC2    |
| 64106  | 5.0   | 1.0   | 1.0   | 2.7  | NPFFR1  |
| 10886  | 1.0   | 1.0   | 2.3   | 1.0  | NPFFR2  |
| 27031  | 1.0   | 1.0   | 4.8   | 1.0  | NPHP3   |
| 7827   | 1.0   | 1.9   | 1.0   | 1.0  | NPHS2   |
| 23117  | 1.6   | -11.9 | -19.3 | -9.1 | NPIPL3  |
| 80896  | 1.0   | -2.7  | -2.8  | -2.8 | NPL     |
| 4869   | 1.6   | 1.0   | 1.0   | -2.4 | NPM1    |
| 4878   | 1.0   | 1.0   | 2.7   | 1.0  | NPPA    |
| 4881   | 1.0   | 1.0   | 4.9   | 1.0  | NPR1    |
| 4882   | 1.0   | 1.0   | 1.0   | 1.0  | NPR2    |
| 8131   | -2.9  | 1.0   | 1.0   | 1.0  | NPRL3   |
| 387129 | 1.0   | 1.0   | 6.2   | 6.3  | NPSR1   |
| 23467  | 1.0   | 1.0   | 1.0   | -1.7 | NPTXR   |
| 64111  | 1.0   | 1.0   | 1.0   | 1.0  | NPVF    |
| 4852   | 1.0   | 1.0   | 1.0   | 8.4  | NPY     |
| 4886   | -30.4 | 1.0   | 1.0   | 1.0  | NPY1R   |
| 4887   | 1.0   | 1.0   | 1.0   | -2.7 | NPY2R   |
| 4835   | 1.0   | 1.0   | 1.0   | 1.0  | NQO2    |
| 9572   | 1.0   | -4.9  | 1.0   | -4.7 | NR1D1   |
| 9975   | 1.0   | 1.0   | 1.0   | 1.0  | NR1D2   |
| 9971   | 3.7   | 6.4   | 1.0   | 1.0  | NR1H4   |
| 9970   | 1.0   | 1.0   | 1.0   | 1.0  | NR1I3   |
| 7181   | 1.0   | 1.0   | 1.0   | 1.0  | NR2C1   |
| 7182   | 1.0   | 1.0   | 1.0   | 1.0  | NR2C2   |
| 10002  | 1.0   | 1.0   | 1.0   | 1.0  | NR2E3   |
| 2063   | 1.0   | 1.0   | 1.0   | 1.0  | NR2F6   |
| 2908   | 1.0   | 1.0   | -5.7  | -5.4 | NR3C1   |
| 4306   | 1.0   | 1.0   | 1.0   | 1.0  | NR3C2   |
| 8013   | 1.0   | 1.0   | 1.0   | 1.0  | NR4A3   |
| 2516   | 1.0   | 3.3   | 1.0   | 1.0  | NR5A1   |
| 2649   | 1.0   | 1.0   | 5.4   | 6.1  | NR6A1   |
| 4893   | 1.5   | 1.0   | 1.0   | 1.0  | NRAS    |
| 29959  | 1.7   | 1.0   | 1.0   | -4.5 | NRBP1   |
| 4897   | 1.0   | 1.0   | 4.1   | 1.0  | NRCAM   |
| 4898   | 4.9   | 1.0   | 1.0   | 1.0  | NRD1    |
| 9542   | 2.3   | 1.0   | 1.0   | 2.8  | NRG2    |
| 4900   | 1.0   | 1.0   | 1.0   | 1.0  | NRGN    |
| 8204   | 1.0   | 1.0   | 1.0   | 1.0  | NRIP1   |
| 56675  | 1.0   | 1.0   | 5.1   | 1.0  | NRIP3   |
| 11270  | 1.0   | 1.0   | 1.0   | 3.0  | NRM     |
| 51299  | 2.6   | -3.9  | -6.7  | -9.7 | NRN1    |

|        |       |      |      |      |          |
|--------|-------|------|------|------|----------|
| 123904 | 1.0   | 1.0  | 5.1  | 1.0  | NRN1L    |
| 8829   | 1.0   | 1.0  | -3.2 | 1.0  | NRP1     |
| 8828   | 1.0   | 1.0  | 4.9  | 1.0  | NRP2     |
| 80023  | 1.0   | 1.0  | 1.0  | 1.0  | NRSN2    |
| 9378   | 1.7   | -1.7 | 1.0  | 5.3  | NRXN1    |
| 10412  | -11.1 | -5.6 | 1.0  | -8.4 | NSA2     |
| 64324  | 1.0   | 1.0  | 1.0  | 1.0  | NSD1     |
| 4905   | 1.0   | 1.0  | 1.0  | 1.0  | NSF      |
| 84081  | 1.0   | 1.0  | -1.7 | 1.0  | NSRP1    |
| 54888  | 1.0   | 1.0  | 1.0  | 1.0  | NSUN2    |
| 63899  | 2.5   | 1.0  | 1.0  | -3.2 | NSUN3    |
| 79730  | 1.0   | 1.0  | 1.0  | 1.0  | NSUN7    |
| 115024 | 17.4  | 3.3  | 1.0  | 3.4  | NT5C3L   |
| 221294 | 1.0   | 1.0  | 1.0  | 1.0  | NT5DC1   |
| 64943  | 1.5   | 1.0  | -3.1 | 1.0  | NT5DC2   |
| 4907   | 1.0   | 1.0  | 1.0  | 1.0  | NT5E     |
| 126147 | 1.0   | 1.0  | 1.0  | 1.0  | NTN5     |
| 22854  | 1.0   | 1.0  | 1.0  | 1.0  | NTNG1    |
| 84628  | 1.0   | 1.0  | 5.3  | 1.0  | NTNG2    |
| 84284  | 1.0   | 1.0  | 4.8  | 1.0  | NTPCR    |
| 4915   | 1.0   | 1.0  | 1.0  | 1.0  | NTRK2    |
| 4923   | 2.7   | 1.0  | 1.0  | 3.3  | NTSR1    |
| 9891   | 1.0   | 1.0  | 1.9  | 1.7  | NUAK1    |
| 4682   | 1.0   | 1.0  | 1.0  | 1.0  | NUBP1    |
| 80224  | 1.0   | 1.0  | 1.0  | 1.0  | NUBPL    |
| 4924   | 1.0   | 1.0  | 1.0  | 1.0  | NUCB1    |
| 64710  | 1.0   | -8.3 | 1.0  | 1.0  | NUCKS1   |
| 23386  | 1.0   | -4.0 | 5.1  | 5.2  | NUDCD3   |
| 25961  | -3.1  | 1.0  | 1.0  | 1.0  | NUDT13   |
| 256281 | 2.8   | 1.0  | 1.0  | 2.8  | NUDT14   |
| 55270  | 1.0   | 1.0  | 1.0  | 1.0  | NUDT15   |
| 131870 | 1.0   | 1.0  | 1.0  | 1.0  | NUDT16   |
| 84309  | 1.0   | 1.0  | -3.6 | 1.0  | NUDT16L1 |
| 390916 | 1.0   | 2.8  | 5.7  | 1.0  | NUDT19   |
| 318    | -2.0  | -3.8 | -3.7 | -3.6 | NUDT2    |
| 11163  | 1.0   | 1.0  | 1.0  | 1.0  | NUDT4    |
| 11164  | 1.0   | -2.5 | 1.0  | -2.4 | NUDT5    |
| 254552 | 1.0   | 1.0  | 1.0  | 2.4  | NUDT8    |
| 4926   | 1.0   | 1.0  | 1.0  | -3.2 | NUMA1    |
| 8650   | 1.0   | 1.0  | 1.0  | 1.0  | NUMB     |
| 57122  | 1.0   | 1.0  | 1.0  | 1.0  | NUP107   |
| 9631   | 1.0   | 1.0  | 1.0  | 1.0  | NUP155   |
| 23279  | 1.0   | 1.0  | 3.7  | 1.0  | NUP160   |
| 23165  | 1.0   | 2.5  | 2.3  | 1.0  | NUP205   |
| 23636  | 1.0   | 1.0  | 4.4  | 4.8  | NUP62    |
| 11097  | 1.0   | 1.0  | 2.5  | 1.0  | NUPL2    |
| 116150 | 1.0   | 1.0  | 2.5  | 1.0  | NUS1     |
| 55998  | 1.5   | 3.0  | 4.0  | 3.2  | NXF5     |

|        |       |       |      |      |          |
|--------|-------|-------|------|------|----------|
| 158046 | 1.0   | 1.0   | 1.0  | 1.0  | NXNL2    |
| 11247  | 1.0   | 1.0   | 1.0  | 1.0  | NXPH4    |
| 55916  | 1.0   | 1.0   | 1.0  | 2.2  | NXT2     |
| 57523  | 1.0   | 1.0   | 1.0  | 1.0  | NYNRIN   |
| 4939   | 1.0   | 3.2   | 1.0  | 1.0  | OAS2     |
| 4940   | 2.4   | 1.0   | 1.0  | 4.5  | OAS3     |
| 8638   | 1.0   | 1.0   | 1.0  | 1.0  | OASL     |
| 4947   | 1.0   | 1.0   | -2.5 | 1.0  | OAZ2     |
| 51686  | 1.0   | 1.0   | 1.0  | 1.0  | OAZ3     |
| 64859  | -1.8  | 1.0   | 2.5  | 1.0  | OBFC2A   |
| 29991  | 1.0   | 1.0   | 1.0  | 1.0  | OBP2A    |
| 84033  | 1.0   | 1.0   | 1.0  | 1.0  | OBSCN    |
| 23363  | 1.0   | 1.0   | 3.9  | 1.0  | OBSL1    |
| 79629  | -42.9 | 2.7   | 1.0  | 1.0  | OCEL1    |
| 132299 | 1.0   | 2.8   | 2.6  | 1.0  | OCIAD2   |
| 4953   | 2.8   | 1.0   | 1.0  | 1.0  | ODC1     |
| 57489  | 1.0   | -10.0 | -8.6 | -5.8 | ODF2L    |
| 113746 | 1.0   | 1.0   | 1.0  | 1.0  | ODF3     |
| 284451 | 1.0   | 1.0   | 1.0  | 1.0  | ODF3L2   |
| 146852 | 1.0   | 1.0   | 1.0  | 1.0  | ODF4     |
| 10178  | 1.0   | 1.0   | 1.0  | 4.8  | ODZ1     |
| 55714  | 1.0   | 1.0   | 2.9  | 1.0  | ODZ3     |
| 79676  | 1.0   | 4.9   | 6.9  | 5.4  | OGFOD2   |
| 4968   | 1.8   | 1.0   | 1.0  | -2.7 | OGG1     |
| 4969   | 1.0   | 1.0   | 4.9  | 1.0  | OGN      |
| 8473   | -1.8  | 1.0   | 1.0  | 1.0  | OGT      |
| 729082 | 1.0   | -5.7  | 1.0  | 1.0  | OIP5-AS1 |
| 10439  | 1.0   | 1.0   | 3.4  | -3.5 | OLFM1    |
| 169611 | 1.0   | 1.0   | 4.9  | 2.5  | OLFML2A  |
| 56944  | -1.8  | 1.0   | 1.0  | 1.0  | OLFML3   |
| 116448 | 1.0   | 1.0   | 1.0  | 1.0  | OLIG1    |
| 4958   | 1.0   | 1.0   | 1.0  | 1.0  | OMD      |
| 4974   | 1.6   | 1.0   | 1.0  | 1.0  | OMG      |
| 9480   | 1.0   | 1.0   | 1.0  | 3.6  | ONECUT2  |
| 441161 | 1.0   | 5.0   | 6.2  | 1.0  | OOEP     |
| 4976   | 1.0   | 1.0   | 1.0  | 3.3  | OPA1     |
| 93377  | 1.0   | 1.0   | 1.0  | 3.3  | OPALIN   |
| 221391 | 1.0   | -2.9  | 1.0  | 1.0  | OPN5     |
| 4985   | 1.8   | 1.0   | 1.6  | 1.0  | OPRD1    |
| 4987   | 1.0   | 1.0   | 1.0  | 1.0  | OPRL1    |
| 341276 | 17.5  | 1.0   | 1.0  | 1.0  | OR10A2   |
| 283297 | 1.0   | 1.0   | 1.0  | 2.8  | OR10A4   |
| 442194 | 1.0   | 1.0   | 1.0  | 1.0  | OR10C1   |
| 219869 | 1.0   | 4.0   | 1.0  | 1.0  | OR10G8   |
| 26539  | 1.0   | 1.0   | 1.0  | 6.5  | OR10H1   |
| 26538  | 1.7   | 1.0   | 1.0  | -1.6 | OR10H2   |
| 128360 | 1.0   | 1.0   | 1.0  | 2.5  | OR10T2   |
| 440153 | 1.0   | 1.0   | 1.0  | 1.0  | OR11H12  |



|        |       |      |      |      |         |
|--------|-------|------|------|------|---------|
| 81797  | 1.0   | 1.0  | 1.0  | 1.0  | OR12D3  |
| 138804 | 1.0   | 1.0  | 1.0  | 1.0  | OR13C4  |
| 286365 | 1.0   | 1.0  | 1.0  | 1.0  | OR13D1  |
| 26189  | 1.0   | 1.0  | 3.0  | 1.0  | OR1A2   |
| 26188  | 1.0   | 1.0  | 1.0  | 1.0  | OR1C1   |
| 8386   | 3.0   | 1.0  | 1.0  | 1.0  | OR1D5   |
| 8387   | 1.0   | 1.0  | 2.8  | 1.0  | OR1E1   |
| 4992   | 1.0   | 1.0  | 3.6  | 1.0  | OR1F1   |
| 26184  | 1.0   | 2.7  | 1.0  | 1.0  | OR1F2P  |
| 26735  | 1.0   | 1.0  | 1.0  | 1.0  | OR1L3   |
| 401428 | 1.0   | 4.4  | 1.0  | 3.4  | OR2A20P |
| 392138 | -10.5 | 1.0  | 1.0  | 1.0  | OR2A25  |
| 401427 | 1.0   | 1.0  | 1.0  | 1.0  | OR2A7   |
| 81697  | 1.0   | -2.9 | 1.0  | 1.0  | OR2B2   |
| 26212  | 1.0   | 1.0  | 1.0  | 1.0  | OR2B6   |
| 4993   | 1.0   | 1.0  | 1.0  | 1.0  | OR2C1   |
| 81472  | 1.0   | 1.0  | 1.0  | 1.0  | OR2C3   |
| 26211  | 1.0   | 1.0  | 1.9  | 2.3  | OR2F1   |
| 26716  | 1.0   | -5.6 | -6.4 | -5.6 | OR2H1   |
| 7932   | 9.5   | 2.5  | 1.0  | 1.0  | OR2H2   |
| 26707  | 1.0   | 1.5  | 1.0  | 1.0  | OR2J2   |
| 391194 | 1.0   | 1.0  | 1.0  | 1.0  | OR2M2   |
| 56656  | 1.0   | 1.0  | 1.0  | 1.0  | OR2S2   |
| 401993 | 1.0   | 1.0  | 1.0  | 6.8  | OR2T5   |
| 343172 | 1.0   | 1.0  | 1.0  | 1.0  | OR2T8   |
| 285659 | 1.0   | 1.0  | 1.0  | 1.0  | OR2V2   |
| 343171 | 1.0   | 1.0  | 2.3  | 1.0  | OR2W3   |
| 4995   | 1.0   | 1.0  | 3.4  | 1.0  | OR3A2   |
| 81328  | 1.0   | 1.0  | 1.0  | 1.0  | OR4A15  |
| 124538 | 1.0   | 1.0  | 1.0  | 1.0  | OR4D2   |
| 79544  | 1.5   | 4.8  | 1.0  | 1.0  | OR4K1   |
| 390436 | 1.0   | 1.0  | 1.0  | 1.0  | OR4K17  |
| 79345  | 1.0   | 1.0  | 1.0  | 1.0  | OR51B2  |
| 79339  | 1.0   | 1.0  | 1.0  | 1.0  | OR51B4  |
| 119774 | 1.0   | 2.7  | 1.0  | 1.0  | OR52K2  |
| 387748 | 1.0   | 1.0  | 1.0  | 5.6  | OR56B1  |
| 338675 | 1.0   | 2.8  | 2.5  | 1.0  | OR5AP2  |
| 338674 | 1.0   | 10.5 | 1.0  | 1.0  | OR5F1   |
| 10798  | 1.0   | 1.0  | 1.0  | 1.0  | OR5I1   |
| 120065 | 1.0   | 3.1  | 4.1  | 2.6  | OR5P2   |
| 120066 | 1.0   | 1.0  | 1.0  | 1.0  | OR5P3   |
| 8590   | 1.0   | 1.0  | 1.0  | 1.0  | OR6A2   |
| 128372 | 1.0   | 1.0  | 3.1  | 3.3  | OR6N1   |
| 391112 | 1.0   | 1.0  | 1.0  | 1.0  | OR6Y1   |
| 390892 | 1.0   | 1.0  | 1.0  | 1.0  | OR7A10  |
| 26333  | 1.0   | 1.0  | 1.0  | 4.5  | OR7A17  |
| 125958 | 1.0   | 1.0  | 1.0  | 1.0  | OR7D4   |
| 10819  | 1.0   | 1.0  | 1.0  | 1.0  | OR7E14P |

|        |       |      |      |      |         |
|--------|-------|------|------|------|---------|
| 219445 | 1.0   | 3.1  | 3.1  | 1.0  | OR7E5P  |
| 79315  | 1.0   | 1.0  | 1.0  | 1.0  | OR7E91P |
| 390883 | 1.0   | 1.0  | 2.6  | 1.0  | OR7G3   |
| 26493  | -1.8  | 1.0  | 1.0  | 1.0  | OR8B8   |
| 283160 | 1.0   | 1.0  | 1.5  | 1.0  | OR8D2   |
| 26494  | 1.0   | 1.0  | 1.0  | 1.0  | OR8G1   |
| 219477 | 1.0   | 1.0  | 1.0  | 1.0  | OR8J1   |
| 80228  | 1.0   | 1.0  | 1.0  | 1.0  | ORAI2   |
| 93129  | 1.0   | 1.0  | 1.0  | 1.0  | ORAI3   |
| 220064 | 1.0   | 1.0  | 1.0  | 1.0  | ORAOV1  |
| 4999   | 1.0   | 1.0  | 1.0  | 1.0  | ORC2    |
| 23595  | 4.0   | 29.4 | 1.0  | 1.0  | ORC3    |
| 5000   | 1.0   | 1.0  | 1.0  | 1.0  | ORC4    |
| 5001   | 1.0   | 2.6  | 2.7  | 1.0  | ORC5    |
| 5004   | 1.0   | 1.0  | 1.0  | 1.0  | ORM1    |
| 5005   | 1.0   | 1.0  | 1.0  | 1.0  | ORM2    |
| 94101  | -4.2  | 1.0  | 1.0  | 1.0  | ORMDL1  |
| 29095  | 1.0   | 1.0  | 3.0  | 1.0  | ORMDL2  |
| 10956  | 1.0   | 1.0  | 1.0  | 1.0  | OS9     |
| 5007   | 1.0   | 1.0  | 4.2  | 4.0  | OSBP    |
| 23762  | 1.0   | 1.0  | 2.9  | 1.0  | OSBP2   |
| 114876 | 1.0   | 1.0  | 1.0  | 1.0  | OSBPL1A |
| 114879 | -5.3  | 1.0  | 4.7  | 1.0  | OSBPL5  |
| 55644  | 1.0   | 1.0  | 1.0  | 1.0  | OSGEP   |
| 5008   | 1.0   | 6.1  | 1.0  | 4.8  | OSM     |
| 26578  | 1.0   | 1.0  | 1.0  | 1.0  | OSTF1   |
| 55611  | 1.0   | -4.3 | 1.0  | 1.0  | OTUB1   |
| 78990  | 1.0   | 1.0  | 1.0  | 1.0  | OTUB2   |
| 220213 | 1.0   | 1.0  | 1.0  | 5.7  | OTUD1   |
| 139562 | 2.7   | 4.4  | 1.0  | 1.0  | OTUD6A  |
| 51633  | 1.0   | -2.1 | -2.1 | 1.0  | OTUD6B  |
| 161725 | 1.9   | 2.8  | 1.0  | 1.0  | OTUD7A  |
| 5015   | 1.0   | 1.0  | 2.9  | 2.6  | OTX2    |
| 22953  | 1.0   | 1.0  | 1.0  | 1.0  | P2RX2   |
| 9127   | 1.0   | 1.0  | 1.0  | 2.3  | P2RX6   |
| 5027   | 1.0   | 1.0  | 1.0  | 1.0  | P2RX7   |
| 27334  | 16.6  | 1.0  | 1.0  | 1.0  | P2RY10  |
| 53829  | 1.0   | 1.0  | 2.4  | 1.0  | P2RY13  |
| 5030   | 1.0   | 1.0  | 1.0  | -1.7 | P2RY4   |
| 5034   | 82.3  | 78.2 | 78.7 | 78.5 | P4HB    |
| 54681  | -14.5 | 1.0  | 1.0  | 1.0  | P4HTM   |
| 80336  | 1.0   | 1.0  | 1.0  | 1.0  | PABPC1L |
| 8761   | 1.0   | 1.0  | 5.0  | 1.0  | PABPC4  |
| 132430 | 1.0   | 1.0  | 1.0  | 1.0  | PABPC4L |
| 140886 | 1.0   | 4.6  | 1.0  | 1.0  | PABPC5  |
| 29993  | 1.0   | 2.6  | 3.3  | 1.0  | PACSIN1 |
| 11252  | 1.0   | 1.0  | 1.0  | -3.1 | PACSIN2 |
| 29943  | 1.0   | 1.0  | 1.0  | 1.0  | PADI1   |

|        |      |      |      |      |          |
|--------|------|------|------|------|----------|
| 11240  | 1.0  | 1.0  | 3.8  | 1.0  | PADI2    |
| 51702  | 1.0  | 1.9  | 1.0  | -4.1 | PADI3    |
| 54623  | -1.5 | 1.0  | 1.0  | 1.0  | PAF1     |
| 5048   | 1.0  | 1.0  | 1.0  | 1.0  | PAFAH1B1 |
| 5050   | 1.0  | 1.0  | 1.0  | 1.0  | PAFAH1B3 |
| 9506   | 1.0  | 1.0  | 1.0  | -6.1 | PAGE4    |
| 51247  | 1.0  | 1.0  | 1.0  | 5.9  | PAIP2    |
| 55003  | 1.0  | -2.6 | -3.6 | 1.0  | PAK1IP1  |
| 56924  | 1.0  | 1.0  | 3.1  | 1.0  | PAK6     |
| 23022  | 1.0  | 1.0  | 1.0  | 2.8  | PALLD    |
| 342979 | 1.0  | 2.8  | 1.6  | 2.8  | PALM3    |
| 25891  | 1.0  | 1.0  | 1.0  | 3.5  | PAMR1    |
| 80025  | 1.0  | 1.0  | 1.0  | 1.0  | PANK2    |
| 79646  | 1.0  | -2.6 | 1.0  | 1.0  | PANK3    |
| 196743 | 1.0  | 1.0  | 1.0  | 1.0  | PAOX     |
| 390928 | 1.0  | 1.0  | 1.0  | 1.0  | PAPL     |
| 89932  | 1.0  | 1.0  | 2.6  | 1.0  | PAPLN    |
| 10914  | 1.0  | 1.0  | 1.0  | 1.0  | PAPOLA   |
| 9061   | 1.0  | 1.0  | 1.0  | 1.0  | PAPSS1   |
| 124222 | 1.0  | 1.0  | 1.0  | 1.0  | PAQR4    |
| 164091 | 1.0  | 1.0  | 1.0  | 1.0  | PAQR7    |
| 85315  | 1.0  | 1.0  | 1.0  | 1.0  | PAQR8    |
| 56288  | 1.0  | 6.6  | 7.1  | 1.0  | PARD3    |
| 8505   | 1.0  | 1.0  | 1.0  | 1.0  | PARG     |
| 55486  | 1.0  | -2.5 | 1.0  | 1.0  | PARL     |
| 5073   | 1.0  | 1.0  | 1.0  | 1.0  | PARN     |
| 64761  | 1.0  | 1.0  | 1.0  | 1.0  | PARP12   |
| 10038  | 1.0  | 1.0  | 1.0  | 1.0  | PARP2    |
| 10039  | 1.0  | 1.0  | -1.6 | 1.0  | PARP3    |
| 143    | -2.9 | 1.0  | 1.0  | 1.0  | PARP4    |
| 79668  | 1.0  | 1.0  | 1.0  | 2.5  | PARP8    |
| 25859  | 1.0  | 1.0  | 1.0  | 1.0  | PART1    |
| 29780  | 1.0  | 1.0  | 2.2  | 1.0  | PARVB    |
| 23178  | 1.0  | 1.0  | 1.0  | 5.9  | PASK     |
| 23598  | 1.0  | 1.0  | 5.9  | 3.6  | PATZ1    |
| 5074   | 1.0  | 1.0  | 1.0  | 1.0  | PAWR     |
| 5078   | -2.6 | 1.0  | 4.2  | 4.9  | PAX4     |
| 5080   | 1.0  | 1.0  | 1.0  | 1.0  | PAX6     |
| 5083   | 1.0  | -2.6 | 1.0  | 1.0  | PAX9     |
| 59351  | 1.0  | 1.0  | 1.0  | 1.0  | PBOV1    |
| 5087   | 1.0  | 1.0  | 1.0  | 1.0  | PBX1     |
| 54039  | 1.0  | 1.0  | 1.0  | 1.0  | PCBP3    |
| 57060  | 1.0  | 1.0  | 1.0  | 1.0  | PCBP4    |
| 5097   | 1.9  | 4.0  | 1.0  | 1.0  | PCDH1    |
| 51294  | 1.0  | 6.7  | 1.0  | 1.0  | PCDH12   |
| 65217  | 1.0  | -3.3 | -6.0 | -3.2 | PCDH15   |
| 57526  | 1.0  | 4.5  | 1.0  | 1.0  | PCDH19   |
| 5099   | 1.0  | 1.0  | 1.0  | 1.0  | PCDH7    |

|        |      |      |      |      |          |
|--------|------|------|------|------|----------|
| 5101   | -9.1 | 1.0  | 1.0  | 1.0  | PCDH9    |
| 56138  | 1.0  | 3.7  | 1.0  | 2.4  | PCDHA11  |
| 56123  | 1.0  | 2.9  | 3.0  | 1.0  | PCDHB13  |
| 56131  | 1.0  | 2.4  | 1.0  | 1.0  | PCDHB4   |
| 56128  | 1.0  | 5.8  | 1.0  | 5.7  | PCDHB8   |
| 56107  | 1.0  | 1.0  | 1.0  | 2.2  | PCDHGA9  |
| 56103  | 1.0  | 1.0  | 2.0  | 1.0  | PCDHGB2  |
| 8641   | 1.0  | 2.5  | 1.0  | 1.0  | PCDHGB4  |
| 56099  | 1.0  | 1.0  | -4.5 | 1.0  | PCDHGB7  |
| 56097  | 1.0  | 1.0  | 1.0  | 1.0  | PCDHGC5  |
| 84759  | 1.0  | 1.0  | 1.0  | 1.0  | PCGF1    |
| 84108  | 1.0  | 1.0  | 1.0  | 1.0  | PCGF6    |
| 55795  | 1.0  | 1.0  | 1.0  | 1.0  | PCID2    |
| 5106   | -1.5 | 1.0  | 1.0  | -8.7 | PCK2     |
| 5110   | -2.0 | -2.5 | -2.5 | 1.0  | PCMT1    |
| 5111   | 1.0  | -2.5 | -2.5 | -2.5 | PCNA     |
| 57092  | 1.0  | 1.0  | 6.3  | 1.0  | PCNP     |
| 22990  | 2.4  | 1.0  | -2.0 | 1.0  | PCNX     |
| 5121   | -2.7 | 1.0  | -2.6 | -2.5 | PCP4     |
| 5125   | 1.0  | 29.7 | 1.0  | 1.0  | PCSK5    |
| 5046   | 1.0  | 1.0  | 2.8  | 1.0  | PCSK6    |
| 9159   | 1.9  | 1.0  | 1.0  | 1.9  | PCSK7    |
| 255738 | 1.0  | 1.0  | 3.6  | 3.4  | PCSK9    |
| 58488  | 1.0  | 1.0  | 1.0  | 1.0  | PCTP     |
| 78991  | 1.0  | 1.0  | 4.6  | 1.0  | PCYOX1L  |
| 5130   | 1.0  | 1.0  | -2.6 | 1.0  | PCYT1A   |
| 9468   | 1.0  | 1.0  | 1.0  | 1.0  | PCYT1B   |
| 5833   | 1.5  | 1.0  | 1.0  | 2.4  | PCYT2    |
| 5132   | 1.0  | 1.0  | 1.0  | 1.0  | PDC      |
| 22984  | 1.0  | 1.0  | 1.0  | 1.0  | PDCD11   |
| 80380  | 1.0  | 1.0  | 1.0  | 1.0  | PDCD1LG2 |
| 5134   | 1.0  | 1.0  | 1.0  | -2.6 | PDCD2    |
| 10016  | 1.0  | 1.0  | 1.0  | 1.0  | PDCD6    |
| 347862 | -4.5 | 1.0  | 1.0  | 1.6  | PDDC1    |
| 5136   | 1.0  | 1.0  | 1.0  | 1.0  | PDE1A    |
| 5137   | 1.0  | 1.0  | 1.0  | 1.0  | PDE1C    |
| 5141   | 1.0  | 1.0  | 1.0  | 1.0  | PDE4A    |
| 9659   | 1.0  | -4.2 | -4.3 | 1.0  | PDE4DIP  |
| 5158   | 1.0  | 1.0  | 1.0  | 1.0  | PDE6B    |
| 5148   | 1.0  | 1.0  | 1.0  | 1.0  | PDE6G    |
| 5150   | 2.0  | 1.0  | 1.0  | 1.0  | PDE7A    |
| 5152   | 1.0  | 1.0  | 1.0  | 1.0  | PDE9A    |
| 5154   | 1.0  | 5.1  | 5.1  | 4.7  | PDGFA    |
| 80310  | 1.8  | 1.0  | 1.0  | 1.0  | PDGFD    |
| 5156   | -8.5 | 4.1  | 3.2  | 1.0  | PDGFRA   |
| 8050   | 1.0  | 1.0  | 1.0  | 1.0  | PDHX     |
| 9601   | -5.9 | -3.2 | 1.0  | 1.0  | PDIA4    |
| 10954  | 1.0  | 1.0  | 1.0  | 1.0  | PDIA5    |

|        |      |      |      |      |          |
|--------|------|------|------|------|----------|
| 149420 | 1.0  | 1.0  | 1.0  | 1.0  | PDIK1L   |
| 5164   | 1.0  | 1.0  | 1.0  | 1.0  | PDK2     |
| 5165   | 1.0  | 1.0  | 1.0  | 1.0  | PDK3     |
| 5166   | 1.0  | 8.0  | 8.0  | 1.0  | PDK4     |
| 27295  | 1.0  | 1.0  | 1.0  | 1.0  | PDLIM3   |
| 8572   | 1.0  | 1.0  | 1.0  | 1.0  | PDLIM4   |
| 10611  | 1.0  | 2.3  | -4.1 | -4.4 | PDLIM5   |
| 5170   | 1.5  | 1.0  | 1.0  | 1.0  | PDPK1    |
| 81572  | 1.0  | 1.0  | 1.0  | 1.9  | PDRG1    |
| 23590  | -4.9 | -3.2 | 1.0  | 1.0  | PDSS1    |
| 283970 | 1.0  | 1.0  | 2.4  | 1.0  | PDXDC2P  |
| 8566   | 1.0  | 1.0  | 3.1  | 3.4  | PDXK     |
| 57026  | -3.3 | 1.0  | 1.0  | 1.0  | PDXP     |
| 79849  | 1.0  | 1.0  | 1.0  | 1.0  | PDZD3    |
| 79955  | -5.5 | 1.0  | 1.0  | 1.0  | PDZD7    |
| 10158  | 1.0  | -2.3 | 1.0  | 1.0  | PDZK1IP1 |
| 23024  | 1.0  | 1.0  | 1.0  | 1.0  | PDZRN3   |
| 29951  | 2.4  | 2.2  | 1.0  | 1.0  | PDZRN4   |
| 8682   | 1.0  | 1.8  | 1.0  | 1.0  | PEA15    |
| 157310 | 1.0  | 1.0  | 6.1  | 1.0  | PEBP4    |
| 5175   | 1.0  | -6.7 | 1.0  | 1.0  | PECAM1   |
| 553115 | -2.0 | 1.0  | 1.0  | 1.0  | PEF1     |
| 5178   | 1.0  | -3.1 | -2.6 | 1.0  | PEG3     |
| 5184   | 1.0  | 1.0  | 1.7  | 1.0  | PEPD     |
| 8863   | 1.0  | 1.0  | 1.0  | 1.0  | PER3     |
| 5189   | -5.9 | -6.8 | -6.5 | 1.0  | PEX1     |
| 8800   | 1.0  | 1.0  | 2.3  | 1.0  | PEX11A   |
| 9409   | 1.0  | 1.0  | 1.0  | 1.0  | PEX16    |
| 55670  | 1.0  | 1.0  | 1.0  | 1.0  | PEX26    |
| 5830   | 1.0  | 1.0  | 1.0  | 1.0  | PEX5     |
| 5191   | 1.0  | 1.0  | 6.6  | 1.0  | PEX7     |
| 5207   | 9.1  | 1.0  | 2.6  | 1.0  | PFKFB1   |
| 5208   | 1.0  | 2.4  | 1.8  | 1.0  | PFKFB2   |
| 5209   | -1.8 | 1.0  | 1.0  | 1.0  | PFKFB3   |
| 345456 | 1.0  | 1.0  | 1.0  | 1.0  | PFN3     |
| 643834 | 9.1  | 8.9  | 9.2  | 11.4 | PGA3     |
| 5223   | 1.0  | 1.0  | 1.0  | 1.0  | PGAM1    |
| 192111 | 1.0  | 1.0  | 1.0  | 1.0  | PGAM5    |
| 80055  | 1.0  | 1.0  | -5.5 | 1.0  | PGAP1    |
| 27315  | 1.0  | 1.0  | 1.0  | 1.0  | PGAP2    |
| 93210  | -1.9 | 1.0  | 1.0  | 1.7  | PGAP3    |
| 267002 | 1.0  | 1.0  | 1.0  | 2.5  | PGBD2    |
| 5225   | 2.3  | 1.0  | 1.0  | 1.0  | PGC      |
| 10404  | 1.0  | 3.5  | 1.0  | 3.6  | PGCP     |
| 5228   | -3.0 | 1.0  | 1.0  | 1.0  | PGF      |
| 114770 | 1.0  | 1.0  | 1.0  | 1.0  | PGLYRP2  |
| 57115  | 1.6  | 1.0  | 1.0  | 1.0  | PGLYRP4  |
| 55276  | 1.0  | 1.0  | 1.0  | 1.0  | PGM2     |

|        |       |      |      |      |          |
|--------|-------|------|------|------|----------|
| 5239   | 1.0   | 1.0  | 1.0  | 1.0  | PGM5     |
| 54858  | 1.0   | 1.0  | 1.0  | 1.0  | PGPEP1   |
| 10857  | 1.0   | 1.0  | 1.0  | 1.0  | PGRMC1   |
| 9489   | -4.2  | 1.0  | 1.0  | 1.0  | PGS1     |
| 221692 | 1.0   | 1.0  | 1.0  | 4.5  | PHACTR1  |
| 9749   | -1.5  | 1.0  | -3.1 | 1.0  | PHACTR2  |
| 116154 | 1.0   | 7.2  | 1.0  | 1.0  | PHACTR3  |
| 65979  | 2.4   | 1.0  | -4.2 | 1.0  | PHACTR4  |
| 5245   | 2.5   | -2.8 | -2.6 | -2.6 | PHB      |
| 1911   | 1.0   | 1.0  | 1.0  | -6.0 | PHC1     |
| 1912   | 1.0   | 1.0  | 1.0  | -2.6 | PHC2     |
| 55274  | 7.3   | -2.5 | -3.0 | -3.2 | PHF10    |
| 57649  | 1.0   | 1.0  | 1.0  | 1.0  | PHF12    |
| 9678   | 1.0   | 1.0  | 1.0  | 1.0  | PHF14    |
| 23338  | -17.4 | 1.0  | 1.0  | 1.0  | PHF15    |
| 79960  | 1.0   | 1.0  | 2.5  | 1.0  | PHF17    |
| 51105  | -1.6  | 1.0  | -4.0 | -3.5 | PHF20L1  |
| 51317  | 1.0   | 1.0  | 1.0  | 1.0  | PHF21A   |
| 79142  | -1.8  | 1.0  | 1.0  | 1.0  | PHF23    |
| 84295  | 1.0   | -1.8 | 1.0  | 1.0  | PHF6     |
| 23133  | -5.6  | 1.0  | -6.0 | -6.2 | PHF8     |
| 55023  | 1.0   | 1.0  | -3.7 | 1.0  | PHIP     |
| 5255   | 1.0   | 9.9  | 1.0  | 1.0  | PHKA1    |
| 5257   | 1.0   | 1.0  | 1.0  | 1.0  | PHKB     |
| 22822  | 1.0   | 1.0  | 1.0  | 1.0  | PHLDA1   |
| 90102  | -53.1 | 1.0  | 2.6  | 3.2  | PHLDB2   |
| 653583 | 1.0   | 1.0  | 1.0  | -2.8 | PHLDB3   |
| 23239  | 1.0   | 1.0  | 1.8  | 4.3  | PHLPP1   |
| 162466 | 1.0   | 2.7  | 2.5  | 2.5  | PHOSPHO1 |
| 51050  | 1.0   | 1.0  | 1.0  | 1.0  | PI15     |
| 5266   | 1.5   | 1.0  | 1.0  | 1.0  | PI3      |
| 5298   | 1.0   | 5.5  | 1.0  | 1.0  | PI4KB    |
| 51588  | -1.7  | -6.7 | -5.7 | -5.4 | PIAS4    |
| 10464  | -4.7  | -4.4 | -3.8 | -3.9 | PIBF1    |
| 8301   | 1.0   | 1.0  | 1.0  | 1.0  | PICALM   |
| 55022  | 1.0   | 1.0  | 1.0  | 1.0  | PID1     |
| 55367  | 2.0   | 1.0  | 1.0  | 1.0  | PIDD     |
| 80119  | 3.2   | 1.0  | 1.0  | 1.0  | PIF1     |
| 5281   | 1.0   | 1.0  | 1.0  | 1.0  | PIGF     |
| 10026  | 1.0   | 1.0  | 1.0  | 1.0  | PIGK     |
| 9487   | 1.0   | 1.0  | 4.8  | 1.0  | PIGL     |
| 84720  | 1.0   | 1.0  | 1.0  | 1.0  | PIGO     |
| 9091   | 1.0   | 1.0  | 1.0  | 1.0  | PIGQ     |
| 94005  | 1.0   | 1.7  | 4.3  | 1.0  | PIGS     |
| 128869 | 1.0   | 1.0  | 1.0  | 1.0  | PIGU     |
| 80235  | 1.0   | 1.0  | 1.0  | 1.0  | PIGZ     |
| 55011  | 1.0   | 1.0  | 1.0  | 1.0  | PIH1D1   |
| 5286   | -3.1  | 1.0  | 1.0  | 1.0  | PIK3C2A  |

|        |       |      |       |      |          |
|--------|-------|------|-------|------|----------|
| 5289   | 1.0   | 6.7  | 4.3   | 1.0  | PIK3C3   |
| 5293   | 1.0   | 1.0  | 1.0   | 1.0  | PIK3CD   |
| 23533  | 1.8   | 1.0  | 1.0   | 1.0  | PIK3R5   |
| 146850 | 1.0   | 1.0  | 1.0   | 1.0  | PIK3R6   |
| 29992  | -17.0 | 1.0  | -2.7  | 1.0  | PILRA    |
| 5303   | 1.0   | 1.0  | -2.5  | 1.0  | PIN4     |
| 54984  | 1.0   | 1.0  | 1.0   | 3.7  | PINX1    |
| 54103  | 1.0   | 1.0  | 1.0   | 1.0  | PION     |
| 5304   | -18.9 | 1.0  | 3.2   | 1.0  | PIP      |
| 8396   | 1.0   | 1.0  | 1.0   | 1.0  | PIP4K2B  |
| 8394   | 1.6   | 1.0  | 1.0   | 1.0  | PIP5K1A  |
| 138429 | 1.0   | 1.0  | -3.9  | 1.0  | PIP5KL1  |
| 57095  | 1.0   | 1.0  | 1.0   | 1.0  | PITHD1   |
| 5306   | 1.0   | 1.0  | 4.1   | 1.0  | PITPNA   |
| 26207  | 1.0   | 2.2  | 1.0   | 1.0  | PITPNC1  |
| 10531  | 1.0   | -2.5 | 1.0   | 1.0  | PITRM1   |
| 64219  | 1.0   | 1.0  | 5.3   | -4.2 | PJA1     |
| 114780 | 1.0   | 1.0  | 1.0   | 1.0  | PKD1L2   |
| 342372 | 1.0   | 1.0  | 1.0   | 1.0  | PKD1L3   |
| 91461  | 1.0   | 1.0  | -2.7  | -3.2 | PKDCC    |
| 10343  | 1.0   | 1.0  | -2.2  | 1.0  | PKDREJ   |
| 150967 | 1.0   | 1.0  | 1.0   | 1.0  | PKI55    |
| 5569   | -2.5  | 1.0  | 1.0   | 1.0  | PKIA     |
| 5570   | 1.0   | 1.0  | 1.0   | 1.0  | PKIB     |
| 9088   | 1.0   | 1.0  | 1.0   | 1.0  | PKMYT1   |
| 5585   | -1.8  | 1.0  | 1.0   | 1.0  | PKN1     |
| 5586   | 1.0   | 1.0  | 1.0   | 1.0  | PKN2     |
| 5317   | 1.0   | 1.0  | 1.0   | 1.0  | PKP1     |
| 51365  | 1.0   | 6.2  | 5.2   | 1.0  | PLA1A    |
| 84647  | 1.0   | 1.0  | 1.0   | 1.0  | PLA2G12B |
| 11145  | 1.0   | 5.0  | 4.7   | 4.1  | PLA2G16  |
| 26279  | -16.7 | 1.0  | 1.0   | 1.0  | PLA2G2D  |
| 64600  | 6.0   | 1.0  | -3.0  | -3.2 | PLA2G2F  |
| 8605   | 2.3   | -2.6 | 1.0   | 1.0  | PLA2G4C  |
| 255189 | 1.0   | 1.0  | 1.0   | 1.0  | PLA2G4F  |
| 10761  | 1.0   | 1.0  | 1.0   | 1.0  | PLAC1    |
| 51316  | 1.0   | -5.8 | 1.0   | -3.4 | PLAC8    |
| 5324   | 1.0   | 1.0  | 1.0   | -3.9 | PLAG1    |
| 5329   | 1.0   | 1.0  | 1.0   | 1.0  | PLAUR    |
| 151056 | 1.0   | -3.7 | -7.8  | -3.6 | PLB1     |
| 196463 | 1.0   | 1.0  | 1.0   | 1.0  | PLBD2    |
| 23236  | 1.7   | 1.0  | 3.5   | 6.2  | PLCB1    |
| 5333   | 1.0   | 1.0  | -4.2  | 1.0  | PLCD1    |
| 84812  | 1.0   | 1.0  | -1.5  | 1.0  | PLCD4    |
| 51196  | 1.0   | 1.0  | 1.0   | 1.0  | PLCE1    |
| 5335   | 1.0   | -3.2 | -3.4  | -3.3 | PLCG1    |
| 23007  | -1.7  | 1.0  | 1.0   | 1.0  | PLCH1    |
| 23228  | -15.6 | 1.0  | -35.4 | 1.0  | PLCL2    |

|        |      |      |      |      |          |
|--------|------|------|------|------|----------|
| 55344  | 1.0  | 1.0  | 1.0  | 4.5  | PLCXD1   |
| 257068 | 1.0  | 1.0  | 1.0  | 1.0  | PLCXD2   |
| 122618 | -2.9 | 1.0  | 1.0  | -9.1 | PLD4     |
| 201164 | 1.0  | 1.0  | 3.3  | 1.0  | PLD6     |
| 84725  | 1.0  | 1.0  | -5.3 | 1.0  | PLEKHA8  |
| 55041  | 1.0  | 1.0  | 1.0  | 1.0  | PLEKHB2  |
| 79156  | -4.7 | 1.0  | 3.6  | 1.0  | PLEKHF1  |
| 57480  | 1.0  | 1.0  | 1.0  | 1.0  | PLEKHG1  |
| 26030  | 1.0  | 1.0  | 1.0  | 1.0  | PLEKHG3  |
| 153478 | 1.6  | 1.0  | -3.9 | 1.0  | PLEKHG4B |
| 9842   | 6.7  | 7.4  | 6.4  | 1.0  | PLEKHM1  |
| 23207  | 1.0  | 1.0  | 1.0  | -3.7 | PLEKHM2  |
| 84069  | 1.0  | 1.0  | 1.0  | 1.0  | PLEKHN1  |
| 51177  | 1.0  | -2.6 | 1.0  | 1.0  | PLEKHO1  |
| 5340   | 5.5  | 1.0  | 1.0  | 1.0  | PLG      |
| 10226  | 1.0  | 1.0  | 1.0  | 1.0  | PLIN3    |
| 729359 | 1.0  | 1.0  | 1.0  | 1.0  | PLIN4    |
| 440503 | 1.0  | 3.6  | 9.9  | 4.8  | PLIN5    |
| 126520 | 1.0  | 1.0  | 1.0  | 1.0  | PLK5     |
| 51090  | -3.2 | 1.0  | 1.0  | 1.0  | PLLP     |
| 5351   | 1.7  | 1.0  | 1.0  | 1.0  | PLOD1    |
| 5352   | 1.0  | 1.0  | 2.6  | 1.0  | PLOD2    |
| 5354   | 1.0  | -7.9 | -4.5 | -5.0 | PLP1     |
| 83483  | -1.6 | -1.7 | -2.6 | 1.0  | PLVAP    |
| 57125  | 10.4 | 1.0  | 2.7  | 2.4  | PLXDC1   |
| 91584  | 1.0  | -4.8 | 1.0  | 1.0  | PLXNA4   |
| 23654  | 1.0  | 1.0  | -4.9 | -4.3 | PLXNB2   |
| 10154  | -2.6 | -3.5 | 1.0  | 1.0  | PLXNC1   |
| 148811 | 1.0  | -1.7 | -2.8 | 1.0  | PM20D1   |
| 5366   | 1.0  | 1.0  | 1.0  | 1.0  | PMAIP1   |
| 5367   | 1.0  | 1.0  | 1.0  | 1.0  | PMCH     |
| 56937  | 1.0  | 1.0  | 1.0  | 1.0  | PMEPA1   |
| 83449  | 1.0  | 3.1  | 3.4  | 3.4  | PMFBP1   |
| 23203  | 1.0  | 1.0  | 3.1  | 1.0  | PMPCA    |
| 5378   | 1.0  | 1.0  | -1.9 | 1.0  | PMS1     |
| 5395   | 1.0  | 1.0  | 1.0  | 1.0  | PMS2     |
| 5380   | -3.2 | 1.0  | 2.3  | 1.0  | PMS2L2   |
| 10654  | 1.0  | 1.0  | 1.0  | 1.0  | PMVK     |
| 139728 | 5.5  | 1.0  | 1.0  | 1.0  | PNCK     |
| 11284  | 1.8  | 1.0  | 1.0  | 1.0  | PNKP     |
| 5407   | 1.0  | 1.0  | 1.0  | 1.0  | PNLIPRP1 |
| 9240   | 1.0  | 1.0  | 4.4  | 1.0  | PNMA1    |
| 114824 | 1.5  | 1.0  | -2.4 | 1.0  | PNMA5    |
| 5409   | 1.0  | -4.4 | 1.0  | 1.0  | PNMT     |
| 285848 | 1.0  | -3.8 | 1.0  | 1.0  | PNPLA1   |
| 80339  | 1.0  | 1.0  | -2.7 | 1.0  | PNPLA3   |
| 375775 | 1.0  | 1.0  | 1.0  | 1.0  | PNPLA7   |
| 87178  | 4.5  | 1.0  | -9.1 | 1.0  | PNPT1    |



|        |       |       |      |      |            |
|--------|-------|-------|------|------|------------|
| 10957  | 1.0   | 1.0   | 1.0  | 1.0  | PNRC1      |
| 55629  | 1.0   | 2.3   | 5.1  | 3.3  | PNRC2      |
| 25886  | -4.3  | 1.0   | 1.0  | 1.0  | POC1A      |
| 282809 | 1.0   | 1.0   | 1.0  | 1.0  | POC1B      |
| 50512  | 1.0   | 1.0   | 1.0  | 1.0  | PODXL2     |
| 79983  | 1.0   | 1.0   | -1.8 | 1.0  | POF1B      |
| 23509  | 1.0   | 1.0   | 1.0  | -3.2 | POFUT1     |
| 23275  | 1.0   | 3.3   | 1.0  | 2.3  | POFUT2     |
| 23126  | 1.0   | 1.0   | 6.3  | 1.0  | POGZ       |
| 5423   | 1.0   | 1.0   | -9.8 | 1.0  | POLB       |
| 5425   | 1.0   | 1.0   | 1.0  | 1.0  | POLD2      |
| 10714  | 1.0   | 1.0   | 1.0  | 1.0  | POLD3      |
| 5426   | 1.0   | 1.0   | -2.7 | 1.0  | POLE       |
| 5429   | 1.0   | 1.0   | 1.0  | 1.0  | POLH       |
| 27434  | 1.0   | 1.0   | -7.0 | 1.0  | POLM       |
| 10721  | 1.0   | 1.0   | 1.0  | 3.0  | POLQ       |
| 25885  | 1.0   | 1.0   | 1.0  | 1.0  | POLR1A     |
| 9533   | -14.9 | -3.1  | 1.0  | 1.0  | POLR1C     |
| 51082  | 1.0   | 1.0   | 1.0  | 1.0  | POLR1D     |
| 5430   | 1.8   | 1.0   | 5.4  | 5.6  | POLR2A     |
| 5433   | 1.0   | 1.0   | 1.0  | 1.0  | POLR2D     |
| 5434   | -1.9  | 1.0   | 1.0  | 1.0  | POLR2E     |
| 5435   | 1.0   | 17.0  | 1.0  | 1.0  | POLR2F     |
| 5437   | 1.0   | 1.0   | 3.7  | 1.0  | POLR2H     |
| 5439   | 4.6   | 1.7   | -9.1 | 1.0  | POLR2J     |
| 246721 | 1.8   | 1.0   | 1.0  | 5.8  | POLR2J2    |
| 84820  | 1.0   | 1.0   | 1.0  | 1.0  | POLR2J4    |
| 5440   | -2.9  | 1.0   | 1.0  | 1.0  | POLR2K     |
| 5441   | -2.0  | 1.0   | 1.0  | 1.0  | POLR2L     |
| 55703  | 1.0   | 1.0   | 1.0  | 1.0  | POLR3B     |
| 661    | 1.0   | 1.0   | 1.0  | 1.0  | POLR3D     |
| 10621  | 1.0   | 1.0   | 1.0  | 3.0  | POLR3F     |
| 10622  | 1.0   | 1.0   | 1.0  | 1.0  | POLR3G     |
| 84265  | 2.0   | 4.8   | 1.0  | 1.0  | POLR3GL    |
| 171568 | 1.0   | -2.9  | -2.5 | 1.0  | POLR3H     |
| 646074 | 1.0   | -3.3  | -5.3 | -1.9 | POM121L10P |
| 25812  | 1.0   | 1.0   | 1.0  | 1.0  | POM121L1P  |
| 266697 | 1.0   | 1.0   | 1.0  | 1.0  | POM121L4P  |
| 55624  | -2.6  | -10.7 | 1.0  | 1.0  | POMGNT1    |
| 22932  | 2.1   | 1.0   | -6.2 | 1.0  | POMZP3     |
| 5444   | 1.0   | 1.0   | 1.0  | 1.0  | PON1       |
| 64091  | 1.0   | 1.0   | -3.2 | 1.0  | POPDC2     |
| 5447   | 2.7   | 1.0   | 1.8  | 1.0  | POR        |
| 10631  | -2.8  | 1.0   | 1.0  | 1.0  | POSTN      |
| 25913  | 1.0   | 1.0   | 1.0  | -3.1 | POT1       |
| 317754 | 1.0   | 1.0   | 1.0  | 1.0  | POTED      |
| 5452   | 2.2   | -3.7  | 1.0  | 1.0  | POU2F2     |
| 5453   | 1.0   | 1.0   | -2.3 | 1.0  | POU3F1     |

|           |      |      |      |      |          |
|-----------|------|------|------|------|----------|
| 5458      | 2.6  | 1.0  | 4.2  | 1.0  | POU4F2   |
| 134187    | -7.5 | 1.0  | 3.3  | 4.6  | POU5F2   |
| 100192379 | 1.0  | 4.1  | 1.0  | 1.0  | PP12613  |
| 100130449 | 2.0  | 1.0  | 1.0  | 1.0  | PP14571  |
| 56342     | 1.0  | -2.9 | 1.0  | 1.0  | PPAN     |
| 8611      | 1.0  | 1.0  | 2.6  | 1.0  | PPAP2A   |
| 8613      | 3.9  | 1.0  | 1.8  | 7.7  | PPAP2B   |
| 84513     | 1.0  | 1.0  | 1.0  | 1.0  | PPAPDC1B |
| 84814     | 1.0  | 1.0  | 1.0  | -3.0 | PPAPDC3  |
| 5465      | 1.0  | 1.0  | 5.5  | 1.0  | PPARA    |
| 5468      | 1.0  | 1.0  | -5.8 | 1.0  | PPARG    |
| 133522    | -2.0 | 1.0  | 1.0  | -5.6 | PPARGC1B |
| 10895     | 1.0  | 1.0  | 1.0  | 1.0  | PPBPL2   |
| 60490     | 1.0  | 1.0  | 3.7  | 1.0  | PPCDC    |
| 79717     | 1.0  | 1.0  | 1.0  | 1.0  | PPCS     |
| 79144     | 1.0  | -3.2 | -2.8 | -3.2 | PPDPF    |
| 8541      | 1.0  | 1.0  | 2.8  | 1.0  | PPFIA3   |
| 51535     | 1.0  | -4.4 | 1.0  | 1.0  | PPHLN1   |
| 5479      | 1.0  | -2.7 | -2.7 | -2.6 | PPIB     |
| 9360      | 1.0  | 1.0  | 1.0  | 1.0  | PPIG     |
| 10465     | 1.0  | 3.9  | 1.0  | 4.5  | PPIH     |
| 53938     | 1.0  | 1.0  | 4.7  | 1.0  | PPIL3    |
| 85313     | 1.0  | 1.0  | 5.5  | 6.0  | PPIL4    |
| 9677      | 1.0  | 1.0  | 1.0  | 1.0  | PPIP5K1  |
| 5495      | 1.0  | 1.0  | -3.6 | -3.4 | PPM1B    |
| 8493      | 1.0  | 1.0  | 1.9  | 1.0  | PPM1D    |
| 22843     | 31.7 | 1.0  | -3.1 | 1.0  | PPM1E    |
| 9647      | 1.0  | -2.6 | 1.0  | 1.0  | PPM1F    |
| 152926    | 1.0  | 1.0  | 1.0  | 1.0  | PPM1K    |
| 147699    | 1.0  | 1.0  | 1.0  | 1.0  | PPM1N    |
| 5498      | 1.6  | 1.0  | 1.0  | 1.0  | PPOX     |
| 5499      | -4.7 | 1.0  | 1.0  | 1.0  | PPP1CA   |
| 6992      | 1.7  | 1.0  | 1.0  | -3.0 | PPP1R11  |
| 4660      | 1.0  | 1.0  | 1.0  | 1.0  | PPP1R12B |
| 54776     | 1.0  | -2.8 | 1.0  | 1.0  | PPP1R12C |
| 23368     | 1.7  | -7.6 | 1.0  | 1.0  | PPP1R13B |
| 23645     | -6.2 | 1.0  | 1.0  | 1.0  | PPP1R15A |
| 26051     | -2.4 | 1.0  | 1.0  | 1.0  | PPP1R16B |
| 10842     | 1.0  | 1.0  | 4.5  | 1.0  | PPP1R17  |
| 151242    | 1.0  | 1.0  | 1.0  | 1.0  | PPP1R1C  |
| 129285    | -3.6 | -5.6 | 1.0  | -2.0 | PPP1R21  |
| 9858      | 1.0  | 1.0  | 3.7  | 1.0  | PPP1R26  |
| 79660     | 1.0  | 1.0  | 1.0  | 1.0  | PPP1R3B  |
| 5507      | 1.0  | 3.6  | 5.1  | 1.0  | PPP1R3C  |
| 5516      | 1.0  | 1.0  | 1.0  | 1.0  | PPP2CB   |
| 5518      | 3.1  | 1.0  | 1.0  | 1.0  | PPP2R1A  |
| 5520      | -3.4 | 1.0  | 1.0  | -2.0 | PPP2R2A  |
| 55844     | 3.2  | 1.0  | 1.0  | 2.4  | PPP2R2D  |

|           |      |      |      |      |          |
|-----------|------|------|------|------|----------|
| 5525      | 1.7  | 1.0  | 1.0  | 2.4  | PPP2R5A  |
| 5530      | 1.0  | 1.0  | 1.0  | 1.0  | PPP3CA   |
| 5534      | 1.0  | 1.0  | 1.0  | 1.0  | PPP3R1   |
| 55370     | 1.0  | 5.7  | 1.0  | 1.0  | PPP4R1L  |
| 151987    | 1.0  | 1.0  | -6.8 | 1.0  | PPP4R2   |
| 9701      | -3.0 | 1.0  | 1.0  | 1.0  | PPP6R2   |
| 55291     | 1.0  | 1.0  | 5.2  | 5.1  | PPP6R3   |
| 51029     | 1.0  | 4.1  | 1.0  | 1.0  | PPPDE1   |
| 23082     | 1.0  | 1.0  | 1.0  | 1.0  | PPRC1    |
| 5538      | 1.0  | 1.0  | 1.0  | 1.0  | PPT1     |
| 160760    | 1.0  | 1.0  | 1.7  | 1.0  | PPTC7    |
| 23614     | 1.0  | 1.0  | 1.0  | 2.4  | PPY2     |
| 10084     | 1.0  | 1.0  | 3.1  | 1.0  | PQBP1    |
| 80148     | 1.0  | 1.0  | 1.0  | 1.0  | PQLC1    |
| 54896     | 1.0  | 1.0  | 1.0  | 1.0  | PQLC2    |
| 84366     | 1.0  | 1.0  | 1.0  | 1.0  | PRAC     |
| 84279     | 1.0  | 1.0  | 1.0  | 1.0  | PRADC1   |
| 23532     | 1.0  | 1.0  | 1.0  | 2.6  | PRAME    |
| 65121     | 1.0  | 1.0  | 1.0  | 1.0  | PRAMEF1  |
| 5542      | 4.0  | 6.8  | 6.7  | 1.0  | PRB1     |
| 5545      | 2.0  | -3.4 | -7.8 | 1.0  | PRB4     |
| 56980     | -4.5 | -4.8 | -7.6 | 1.0  | PRDM10   |
| 56981     | 1.6  | 1.0  | 1.6  | 1.0  | PRDM11   |
| 63976     | 1.0  | 1.0  | -3.0 | -3.3 | PRDM16   |
| 7799      | 1.0  | 4.8  | 6.3  | 1.0  | PRDM2    |
| 11108     | 1.0  | 1.0  | -3.0 | 1.0  | PRDM4    |
| 56978     | 1.0  | 1.0  | 1.0  | 1.0  | PRDM8    |
| 56979     | 2.1  | 1.0  | -3.9 | 1.0  | PRDM9    |
| 7001      | 1.0  | -5.5 | -5.6 | 1.0  | PRDX2    |
| 10549     | 1.0  | 1.0  | 6.0  | 1.0  | PRDX4    |
| 25824     | 21.1 | 1.0  | 4.4  | 1.0  | PRDX5    |
| 5549      | 1.0  | 1.0  | 1.0  | 1.0  | PRELP    |
| 5550      | 1.0  | 1.0  | 1.0  | 1.0  | PREP     |
| 9581      | 2.1  | 1.0  | 1.0  | 1.0  | PREPL    |
| 80243     | 2.6  | 1.0  | 1.0  | 1.0  | PREX2    |
| 10394     | 1.0  | 1.0  | 1.0  | 3.5  | PRG3     |
| 85441     | 2.4  | 1.0  | 3.6  | 1.0  | PRIC285  |
| 4007      | 1.0  | 1.0  | 1.0  | 1.0  | PRICKLE3 |
| 5557      | 1.0  | 3.0  | 3.1  | 2.7  | PRIM1    |
| 100169750 | 1.0  | 1.0  | 1.0  | 1.0  | PRINS    |
| 5562      | 1.0  | 1.0  | 1.0  | 1.0  | PRKAA1   |
| 5567      | -2.0 | 1.0  | 1.0  | 6.7  | PRKACB   |
| 5568      | 1.0  | 1.0  | 1.0  | 1.0  | PRKACG   |
| 5571      | 1.0  | 1.0  | 1.0  | 1.0  | PRKAG1   |
| 5573      | 1.0  | 1.0  | 1.0  | 1.0  | PRKAR1A  |
| 5575      | -1.6 | 1.0  | 4.9  | 1.0  | PRKAR1B  |
| 5576      | 1.0  | 1.0  | 1.0  | 1.0  | PRKAR2A  |
| 5583      | 8.7  | 1.0  | 1.0  | 8.5  | PRKCH    |

|        |      |      |      |      |         |
|--------|------|------|------|------|---------|
| 5587   | 1.0  | 4.7  | 4.8  | 4.7  | PRKD1   |
| 23683  | 1.0  | 1.0  | 1.0  | -5.9 | PRKD3   |
| 79706  | 1.7  | 1.0  | 1.0  | 1.0  | PRKRIP1 |
| 5612   | 1.0  | 1.0  | 1.0  | -3.4 | PRKRIR  |
| 5616   | 1.0  | 1.0  | 2.8  | 3.0  | PRKY    |
| 5617   | 1.0  | 1.0  | 2.2  | 1.0  | PRL     |
| 5618   | 1.0  | 1.0  | 1.0  | -2.7 | PRLR    |
| 5619   | 1.0  | -3.6 | -3.5 | -3.5 | PRM1    |
| 5620   | 1.0  | 1.0  | -4.3 | 1.0  | PRM2    |
| 58531  | -4.0 | 1.0  | 1.0  | 1.0  | PRM3    |
| 90826  | 1.0  | 1.0  | 5.9  | 4.1  | PRMT10  |
| 54496  | 4.8  | -6.0 | -5.4 | 1.0  | PRMT7   |
| 5621   | 1.0  | 1.0  | 1.0  | 1.0  | PRNP    |
| 29018  | 1.0  | -3.6 | -5.1 | -4.6 | PRO1768 |
| 55478  | 1.0  | 1.0  | 2.7  | 1.0  | PRO2012 |
| 114224 | 1.0  | 1.0  | 4.4  | 1.0  | PRO2852 |
| 5625   | -7.0 | 1.0  | 1.0  | 1.0  | PRODH   |
| 58510  | 1.0  | 2.5  | 1.8  | 1.0  | PRODH2  |
| 60675  | 1.0  | 1.0  | 9.9  | 1.0  | PROK2   |
| 150696 | 2.0  | 1.0  | -6.5 | 1.0  | PROM2   |
| 5626   | 2.3  | 1.0  | 1.0  | 1.0  | PROP1   |
| 344405 | 1.0  | 1.0  | -4.5 | 1.0  | PRORS1P |
| 5627   | 1.6  | 1.0  | -6.1 | 1.0  | PROS1   |
| 80209  | 1.0  | 1.0  | 1.0  | 1.0  | PROSER1 |
| 8858   | 1.0  | 1.0  | -5.9 | 1.0  | PROZ    |
| 27339  | 1.0  | 1.0  | 1.0  | -2.6 | PRPF19  |
| 26121  | -2.1 | -5.8 | -5.2 | 1.0  | PRPF31  |
| 55660  | 1.0  | 1.0  | 4.6  | 4.2  | PRPF40A |
| 8899   | 1.0  | 1.0  | 1.0  | 2.5  | PRPF4B  |
| 10594  | -1.9 | 1.0  | -5.6 | -5.8 | PRPF8   |
| 5631   | 1.0  | -6.1 | -7.8 | 1.0  | PRPS1   |
| 54458  | 1.0  | -4.3 | 1.0  | 1.0  | PRR13   |
| 78994  | 1.7  | 1.0  | 1.0  | 1.0  | PRR14   |
| 222171 | 2.2  | 4.1  | 3.0  | 1.0  | PRR15   |
| 285800 | 1.0  | 1.0  | 1.0  | 2.3  | PRR18   |
| 80758  | -3.6 | 1.0  | -3.8 | 1.0  | PRR7    |
| 133619 | 1.0  | 1.0  | 1.0  | 1.0  | PRRC1   |
| 5639   | 1.0  | 1.0  | 1.0  | 1.0  | PRRG2   |
| 79057  | 1.0  | 1.0  | 1.0  | -4.4 | PRRG3   |
| 112476 | 1.0  | 1.7  | 1.0  | 1.0  | PRRT2   |
| 51450  | 1.0  | 1.0  | 1.0  | -1.7 | PRRX2   |
| 5644   | -8.6 | -3.1 | -3.0 | -3.1 | PRSS1   |
| 10279  | 1.0  | 2.0  | 3.2  | 1.0  | PRSS16  |
| 5645   | 1.0  | 1.0  | 1.0  | 1.0  | PRSS2   |
| 83886  | 1.0  | 1.0  | 1.0  | 1.0  | PRSS27  |
| 260429 | 1.0  | 1.0  | 1.0  | 1.0  | PRSS33  |
| 167681 | 1.0  | 7.2  | 1.0  | 1.0  | PRSS35  |
| 339501 | 1.0  | 1.0  | 2.8  | 1.0  | PRSS38  |

|        |       |      |      |      |          |
|--------|-------|------|------|------|----------|
| 646960 | 1.0   | 1.0  | -2.1 | 1.0  | PRSS56   |
| 400668 | 1.0   | 1.0  | 1.0  | -1.6 | PRSS57   |
| 56952  | 1.0   | 1.0  | 5.7  | -5.5 | PRTFDC1  |
| 5660   | -17.3 | 1.0  | 1.0  | 1.0  | PSAP     |
| 5663   | 1.0   | 1.0  | 1.0  | 2.5  | PSEN1    |
| 5664   | 1.0   | 1.8  | 2.0  | 1.9  | PSEN2    |
| 55851  | 1.0   | -2.7 | 1.0  | 1.0  | PSENEN   |
| 5680   | 1.0   | 1.0  | 1.0  | 1.0  | PSG11    |
| 5673   | -14.6 | 1.0  | 1.0  | 1.0  | PSG5     |
| 5678   | -2.0  | -7.6 | 1.0  | -6.0 | PSG9     |
| 11168  | -1.6  | -6.3 | -4.8 | -6.3 | PSIP1    |
| 5687   | 1.0   | 1.0  | 1.0  | 1.0  | PSMA6    |
| 5699   | 1.0   | 1.0  | 1.0  | 1.0  | PSMB10   |
| 5690   | -4.6  | 1.0  | 1.0  | 1.0  | PSMB2    |
| 5700   | 1.0   | 1.0  | 2.6  | 1.0  | PSMC1    |
| 5702   | 1.0   | 1.0  | 1.0  | 1.0  | PSMC3    |
| 29893  | 1.0   | 1.0  | -3.4 | 1.0  | PSMC3IP  |
| 5705   | 1.0   | 1.0  | 1.0  | 1.0  | PSMC5    |
| 5706   | 1.0   | 1.0  | 1.0  | 1.0  | PSMC6    |
| 5707   | 1.0   | 1.0  | 1.0  | 1.0  | PSMD1    |
| 5716   | 1.0   | 1.0  | -3.5 | -3.4 | PSMD10   |
| 5719   | 1.0   | -2.5 | 1.0  | -2.7 | PSMD13   |
| 5708   | -2.7  | -5.2 | 1.0  | 1.0  | PSMD2    |
| 5711   | 1.0   | 1.0  | 2.1  | 1.0  | PSMD5    |
| 23198  | 1.0   | 1.8  | 1.0  | 1.0  | PSME4    |
| 9491   | 2.0   | 1.0  | 3.3  | 1.0  | PSMF1    |
| 56984  | 1.0   | 1.0  | 1.0  | 1.0  | PSMG2    |
| 170679 | 1.0   | 1.0  | 1.0  | 1.0  | PSORS1C1 |
| 55269  | 1.0   | -4.5 | -5.3 | 1.0  | PSPC1    |
| 5623   | 1.0   | 1.0  | 1.0  | -1.6 | PSPN     |
| 84722  | 1.0   | 1.0  | 1.0  | 1.0  | PSRC1    |
| 118672 | 1.0   | 1.0  | -1.7 | 1.0  | PSTK     |
| 9051   | 1.0   | 1.0  | 1.0  | 1.0  | PSTPIP1  |
| 9050   | 1.0   | 1.0  | 1.0  | 1.0  | PSTPIP2  |
| 9991   | 1.0   | 1.0  | 4.7  | 1.0  | PTBP3    |
| 55037  | 1.0   | 1.0  | -3.7 | 1.0  | PTCD3    |
| 5727   | 1.0   | 1.0  | 1.0  | 1.0  | PTCH1    |
| 8643   | 1.0   | 1.0  | 1.0  | 1.0  | PTCH2    |
| 57540  | 1.7   | 1.0  | 1.0  | 1.0  | PTCHD2   |
| 171558 | 3.2   | -5.8 | -7.4 | 1.0  | PTCRA    |
| 9791   | 1.0   | 1.0  | 1.0  | 1.0  | PTDSS1   |
| 256297 | -1.9  | -3.2 | -6.3 | -5.2 | PTF1A    |
| 5731   | 1.0   | 1.0  | 2.9  | 1.0  | PTGER1   |
| 5737   | 1.0   | 5.8  | 3.5  | 1.0  | PTGFR    |
| 22949  | 1.0   | 1.0  | 1.0  | -2.9 | PTGR1    |
| 145482 | 1.0   | 2.7  | 1.0  | 2.7  | PTGR2    |
| 5744   | 1.0   | 1.0  | 1.0  | 1.0  | PTHLH    |
| 2185   | 1.0   | 1.0  | 1.0  | 1.0  | PTK2B    |

|        |       |      |      |      |         |
|--------|-------|------|------|------|---------|
| 5754   | 1.0   | 1.0  | 1.8  | 1.0  | PTK7    |
| 5757   | 1.0   | -6.2 | -2.4 | 1.0  | PTMA    |
| 7803   | 1.0   | 1.0  | 1.0  | -2.6 | PTP4A1  |
| 201562 | 1.0   | 1.0  | 1.0  | -3.6 | PTPLB   |
| 5781   | 1.0   | 1.0  | 1.0  | -4.0 | PTPN11  |
| 5784   | 1.5   | 1.0  | 1.0  | 1.0  | PTPN14  |
| 26469  | 1.0   | 1.0  | 1.0  | 1.0  | PTPN18  |
| 26095  | 1.6   | 1.0  | 1.0  | 1.0  | PTPN20B |
| 5775   | -2.0  | -6.3 | 1.0  | 1.0  | PTPN4   |
| 5788   | 1.0   | -2.6 | 4.8  | 9.0  | PTPRC   |
| 5792   | 1.0   | 5.9  | 4.0  | 4.4  | PTPRF   |
| 5793   | 1.0   | 7.0  | 3.7  | 3.1  | PTPRG   |
| 5796   | 1.0   | 6.5  | 1.0  | 1.0  | PTPRK   |
| 5799   | 1.0   | 1.0  | -1.6 | 1.0  | PTPRN2  |
| 5800   | 2.2   | 1.0  | 1.0  | 1.0  | PTPRO   |
| 5802   | -3.3  | 1.0  | 1.0  | 1.0  | PTPRS   |
| 10076  | -18.8 | 1.0  | 4.2  | 1.0  | PTPRU   |
| 284119 | 1.7   | -4.3 | -4.4 | 1.0  | PTRF    |
| 138428 | 1.0   | 1.0  | 1.0  | 1.0  | PTRH1   |
| 51651  | 1.0   | 1.0  | 1.0  | 1.0  | PTRH2   |
| 26255  | 1.0   | 5.0  | 1.0  | 1.0  | PTTG3P  |
| 5806   | 1.0   | 4.7  | 3.5  | 2.6  | PTX3    |
| 22827  | 1.0   | 6.6  | 1.0  | 1.0  | PUF60   |
| 23369  | 4.1   | 1.0  | 1.0  | 1.0  | PUM2    |
| 29942  | 1.0   | 2.1  | 2.4  | 2.4  | PURG    |
| 150962 | -2.1  | -2.1 | -5.0 | 1.0  | PUS10   |
| 83480  | 1.0   | 1.0  | 1.0  | 1.0  | PUS3    |
| 5816   | 1.0   | 1.0  | 1.0  | 1.0  | PVALB   |
| 5817   | 1.0   | 1.0  | 1.0  | 1.0  | PVR     |
| 79037  | 2.6   | 1.0  | 1.0  | 1.0  | PVRIG   |
| 5818   | 1.0   | 1.0  | 1.0  | -3.5 | PVRL1   |
| 25945  | 1.0   | -7.7 | 1.0  | 1.0  | PVRL3   |
| 81607  | 1.0   | 1.0  | 3.3  | 2.8  | PVRL4   |
| 5822   | 1.0   | 1.0  | 1.0  | 1.0  | PWP2    |
| 5827   | 1.0   | 1.0  | 3.7  | 1.0  | PXMP2   |
| 11264  | 1.0   | 1.0  | -3.4 | -3.7 | PXMP4   |
| 5829   | 2.1   | 1.0  | 1.0  | 1.0  | PXN     |
| 29108  | 1.0   | 1.0  | 1.0  | 1.0  | PYCARD  |
| 5831   | -29.1 | 1.0  | 1.0  | 1.0  | PYCR1   |
| 149628 | 1.0   | 1.0  | 1.0  | 1.0  | PYHIN1  |
| 84795  | 5.8   | 1.0  | 1.0  | 1.0  | PYROXD2 |
| 23615  | 2.1   | 1.0  | 1.0  | 1.0  | PYY2    |
| 9444   | -2.1  | 4.1  | 1.0  | -2.9 | QKI     |
| 25797  | 1.0   | 1.0  | 1.0  | 1.0  | QPCT    |
| 55278  | -2.7  | 1.0  | 1.0  | 1.0  | QRSL1   |
| 5768   | -3.5  | 1.0  | 1.0  | 1.0  | QSOX1   |
| 23518  | 1.0   | -4.0 | 1.0  | 1.0  | R3HDM1  |
| 22864  | 2.6   | 1.0  | 1.0  | 1.0  | R3HDM2  |

|        |       |      |      |      |           |
|--------|-------|------|------|------|-----------|
| 140902 | 1.0   | 1.0  | 1.0  | 1.0  | R3HDML    |
| 10890  | 1.0   | 2.7  | 1.0  | 1.0  | RAB10     |
| 80223  | 1.0   | 3.2  | 1.0  | 1.0  | RAB11FIP1 |
| 201475 | 1.0   | 1.0  | 1.0  | 1.0  | RAB12     |
| 376267 | -3.2  | -1.9 | 1.0  | 1.0  | RAB15     |
| 81876  | 1.0   | 1.0  | 1.0  | 1.0  | RAB1B     |
| 55647  | 1.0   | 1.0  | 1.0  | 1.0  | RAB20     |
| 51715  | 1.0   | 1.0  | 1.0  | 1.0  | RAB23     |
| 9364   | 4.4   | -5.6 | -4.8 | 1.0  | RAB28     |
| 27314  | 1.0   | 5.3  | 1.0  | 5.5  | RAB30     |
| 11031  | 1.0   | 1.0  | 1.0  | 1.0  | RAB31     |
| 83452  | -2.3  | 1.0  | -4.3 | 1.0  | RAB33B    |
| 326624 | 1.0   | 1.0  | 1.0  | 1.0  | RAB37     |
| 115827 | 1.0   | -3.4 | 1.0  | 1.0  | RAB3C     |
| 9545   | 1.0   | 1.0  | 1.0  | 1.0  | RAB3D     |
| 53916  | 1.0   | 1.0  | 1.0  | 1.0  | RAB4B     |
| 5868   | 3.0   | 2.5  | 1.0  | 1.0  | RAB5A     |
| 7879   | 2.5   | 1.0  | 1.0  | 1.0  | RAB7A     |
| 51762  | -13.6 | 1.0  | -9.4 | 1.0  | RAB8B     |
| 79874  | 1.6   | 1.0  | 1.0  | 1.0  | RABEP2    |
| 9910   | 1.0   | 1.0  | -2.6 | 4.7  | RABGAP1L  |
| 11159  | -2.2  | 2.9  | 2.6  | 2.6  | RABL2A    |
| 5880   | 2.8   | 1.0  | 1.0  | 3.7  | RAC2      |
| 5810   | 1.0   | 1.0  | 1.0  | 1.0  | RAD1      |
| 10111  | 1.7   | -3.0 | 1.0  | 1.0  | RAD50     |
| 5890   | 1.0   | 1.0  | 1.0  | 1.0  | RAD51B    |
| 5893   | 1.0   | -4.1 | 1.0  | 1.0  | RAD52     |
| 25788  | 1.0   | 2.2  | 2.3  | 1.0  | RAD54B    |
| 5883   | 1.5   | 4.6  | 5.4  | 4.3  | RAD9A     |
| 144715 | 1.0   | 1.0  | 1.0  | 1.0  | RAD9B     |
| 8480   | 1.0   | 3.6  | 1.0  | 2.7  | RAE1      |
| 135250 | -4.3  | 1.0  | 1.0  | -7.1 | RAET1E    |
| 5894   | 1.0   | 1.0  | 2.5  | 2.8  | RAF1      |
| 5897   | 1.0   | 1.0  | 6.7  | 1.0  | RAG2      |
| 10743  | 1.0   | 1.0  | 1.0  | 2.7  | RAI1      |
| 26064  | 1.0   | 1.0  | 1.0  | 1.0  | RAI14     |
| 10742  | 1.0   | 1.0  | 2.5  | 1.0  | RAI2      |
| 10928  | 1.0   | 3.1  | 4.5  | -2.6 | RALBP1    |
| 253959 | -2.3  | 1.0  | 1.0  | 4.4  | RALGAPA1  |
| 57186  | 1.0   | 1.0  | 1.0  | 1.0  | RALGAPA2  |
| 5900   | 1.0   | -5.7 | -5.4 | 1.0  | RALGDS    |
| 9649   | 1.0   | 2.8  | 3.0  | 3.4  | RALGPS1   |
| 10268  | 1.0   | 2.3  | 1.7  | 1.0  | RAMP3     |
| 5901   | 1.0   | 1.0  | 1.0  | 1.0  | RAN       |
| 26953  | 1.0   | 1.0  | 4.6  | 1.0  | RANBP6    |
| 29098  | 1.0   | 2.3  | 1.0  | 1.0  | RANGRF    |
| 5906   | -2.3  | 1.0  | 1.0  | 1.0  | RAP1A     |
| 5908   | 1.0   | 1.0  | 1.0  | 1.0  | RAP1B     |

|        |      |      |      |      |          |
|--------|------|------|------|------|----------|
| 5910   | 1.0  | 1.0  | 2.8  | 1.0  | RAP1GDS1 |
| 5912   | 1.0  | 1.0  | 1.0  | 2.8  | RAP2B    |
| 2889   | 1.0  | 3.7  | 7.4  | 1.0  | RAPGEF1  |
| 9693   | 24.1 | 1.0  | -7.5 | 1.0  | RAPGEF2  |
| 5914   | 1.0  | 1.0  | 1.0  | 1.0  | RARA     |
| 5916   | -1.7 | 1.0  | -3.2 | 1.0  | RARG     |
| 5920   | 1.0  | 1.0  | 1.0  | 1.0  | RARRES3  |
| 57038  | 1.0  | -2.5 | 1.0  | -2.4 | RARS2    |
| 22821  | 1.7  | 1.0  | 1.0  | 1.0  | RASA3    |
| 9462   | 1.0  | 1.0  | 1.0  | 1.0  | RASAL2   |
| 64926  | 1.0  | 3.4  | 1.0  | 1.0  | RASAL3   |
| 51655  | 1.0  | 6.4  | 4.5  | 7.0  | RASD1    |
| 221002 | 1.0  | 1.0  | 1.0  | 1.0  | RASGEF1A |
| 5923   | 1.0  | 1.0  | 1.0  | -4.0 | RASGRF1  |
| 10235  | 1.0  | -2.8 | 2.8  | 1.0  | RASGRP2  |
| 25780  | 2.4  | 1.0  | 1.0  | 1.0  | RASGRP3  |
| 115727 | -4.0 | 1.0  | 1.0  | 1.0  | RASGRP4  |
| 91608  | 1.0  | 1.0  | 1.0  | -3.2 | RASL10B  |
| 387496 | 1.0  | 1.0  | 1.0  | 1.0  | RASL11A  |
| 83593  | 1.0  | 1.0  | 1.0  | 1.0  | RASSF5   |
| 166824 | 1.0  | -3.6 | 1.0  | 1.0  | RASSF6   |
| 11228  | 1.0  | 1.0  | 1.0  | -3.4 | RASSF8   |
| 55225  | 1.0  | -5.4 | -7.7 | 1.0  | RAVER2   |
| 30062  | -1.6 | 1.0  | -4.3 | 1.0  | RAX      |
| 5925   | -3.3 | 1.0  | 1.0  | -2.2 | RB1      |
| 57786  | -1.9 | 1.0  | -5.1 | -3.7 | RBAK     |
| 5928   | -3.5 | 1.0  | 1.0  | 1.0  | RBBP4    |
| 5929   | 1.0  | 1.0  | -5.6 | 1.0  | RBBP5    |
| 5931   | 1.0  | 1.0  | 1.0  | 1.0  | RBBP7    |
| 5932   | 1.0  | 1.0  | 1.0  | 1.0  | RBBP8    |
| 10741  | -2.2 | 1.0  | 1.0  | 1.0  | RBBP9    |
| 10616  | 3.4  | 3.9  | 1.0  | 1.0  | RBCK1    |
| 54715  | 2.3  | 5.2  | 1.0  | 1.0  | RBFOX1   |
| 23543  | 1.0  | 3.0  | 2.5  | 2.4  | RBFOX2   |
| 8241   | 13.3 | 1.0  | 1.0  | 1.0  | RBM10    |
| 10432  | 1.0  | 1.0  | -2.4 | -2.4 | RBM14    |
| 29890  | -6.0 | 1.0  | 3.6  | 1.0  | RBM15B   |
| 9904   | 1.0  | 2.2  | 1.0  | 1.0  | RBM19    |
| 282996 | 1.0  | -2.8 | 1.0  | 1.0  | RBM20    |
| 58517  | 1.0  | 1.0  | 1.0  | 1.0  | RBM25    |
| 55131  | -4.7 | 6.2  | 1.0  | 1.0  | RBM28    |
| 155435 | 1.0  | 1.0  | 1.0  | 1.0  | RBM33    |
| 55285  | 2.8  | 1.0  | 1.0  | -2.1 | RBM41    |
| 79171  | 1.0  | 1.0  | 1.0  | 1.0  | RBM42    |
| 9939   | 1.0  | 1.0  | 1.0  | 1.0  | RBM8A    |
| 27303  | 1.0  | -3.0 | 1.0  | 1.0  | RBMS3    |
| 27316  | 1.0  | 1.0  | -4.2 | 1.0  | RBMX     |
| 11317  | 1.0  | 1.0  | -4.4 | 1.0  | RBPJL    |



|        |       |      |      |      |         |
|--------|-------|------|------|------|---------|
| 11030  | 1.0   | 4.5  | 1.8  | 1.0  | RBPMS   |
| 9978   | 1.0   | 1.0  | 5.8  | 1.0  | RBX1    |
| 149041 | 1.0   | 3.1  | 1.0  | 1.0  | RC3H1   |
| 1102   | 1.0   | 1.0  | 1.0  | 1.0  | RCBTB2  |
| 91433  | 1.0   | 1.0  | 1.9  | 2.4  | RCCD1   |
| 9986   | 1.0   | -2.7 | 1.0  | 1.0  | RCE1    |
| 10171  | 1.0   | 1.0  | 1.0  | 1.0  | RCL1    |
| 23186  | 1.0   | 2.4  | 1.0  | 1.0  | RCOR1   |
| 5957   | 1.0   | -3.0 | 1.0  | -2.9 | RCVRN   |
| 51109  | 1.0   | 1.0  | -4.5 | -6.0 | RDH11   |
| 8608   | 1.0   | 1.0  | 1.0  | 1.0  | RDH16   |
| 5959   | 1.0   | 1.0  | 1.0  | 1.0  | RDH5    |
| 50700  | 1.0   | 1.0  | 1.0  | 4.3  | RDH8    |
| 9985   | 1.0   | 1.0  | 1.0  | 1.0  | REC8    |
| 9401   | 1.0   | 1.0  | 1.0  | 1.0  | RECQL4  |
| 9400   | 1.0   | 1.0  | 6.4  | 1.0  | RECQL5  |
| 65055  | 1.0   | 1.0  | 1.0  | 1.0  | REEP1   |
| 92840  | -12.0 | -3.6 | 1.0  | -3.7 | REEP6   |
| 5068   | 1.0   | 1.0  | 1.0  | 1.0  | REG3A   |
| 83998  | 1.0   | 1.0  | 1.0  | 1.0  | REG4    |
| 5970   | 1.0   | 1.6  | 1.6  | 1.9  | RELA    |
| 5971   | 1.0   | 1.0  | 1.0  | 3.8  | RELB    |
| 768211 | 1.0   | 1.0  | 1.0  | 1.0  | RELL1   |
| 5972   | 4.8   | 1.0  | -2.7 | -2.8 | REN     |
| 5973   | 1.0   | 1.0  | 3.2  | 1.0  | RENBP   |
| 29803  | 5.5   | 1.0  | 1.0  | 1.0  | REPIN1  |
| 85021  | 3.0   | 3.1  | 1.0  | 1.0  | REPS1   |
| 11079  | 1.0   | -3.0 | 1.0  | 1.0  | RER1    |
| 473    | 1.0   | 1.0  | 1.0  | 1.0  | RERE    |
| 56729  | 1.0   | -2.9 | 1.0  | 1.0  | RETN    |
| 54884  | 1.0   | 1.0  | 1.0  | 1.0  | RETSAT  |
| 5980   | 1.0   | 1.0  | -3.1 | -3.0 | REV3L   |
| 254958 | 1.0   | 1.0  | 1.0  | 1.0  | REXO1L1 |
| 5981   | -1.6  | 1.7  | 1.0  | 1.0  | RFC1    |
| 5984   | 1.0   | 1.0  | -4.8 | 1.0  | RFC4    |
| 5986   | -1.7  | 1.0  | 1.0  | 1.0  | RFNG    |
| 91869  | 1.7   | -2.8 | 1.0  | 1.0  | RFT1    |
| 54931  | 1.0   | 1.0  | 1.0  | 1.0  | RG9MTD1 |
| 23179  | 1.0   | -2.8 | -2.6 | -2.4 | RGL1    |
| 9104   | -5.5  | 1.0  | -2.8 | -2.8 | RGN     |
| 5995   | 1.0   | 1.0  | 1.0  | 1.0  | RGR     |
| 6001   | 1.0   | 1.0  | 1.0  | 1.0  | RGS10   |
| 6002   | 1.0   | 2.6  | 1.0  | 1.0  | RGS12   |
| 10636  | -4.2  | 1.0  | 2.5  | 1.0  | RGS14   |
| 6004   | 1.0   | 1.0  | 2.7  | 1.0  | RGS16   |
| 10287  | 4.1   | 1.0  | 1.0  | 1.0  | RGS19   |
| 9628   | 1.0   | 1.0  | 1.0  | 1.0  | RGS6    |
| 64285  | 1.0   | -4.0 | 1.0  | 1.0  | RHBDF1  |

|        |       |      |      |      |         |
|--------|-------|------|------|------|---------|
| 9028   | 1.0   | 1.0  | 1.0  | -3.1 | RHBDL1  |
| 6007   | 1.0   | 1.0  | -6.1 | 1.0  | RHD     |
| 6009   | 1.0   | 1.0  | 1.0  | 1.0  | RHEB    |
| 6010   | -1.8  | 1.0  | 1.0  | 4.7  | RHO     |
| 387    | 1.0   | 4.0  | 1.0  | 1.0  | RHOA    |
| 388    | 1.0   | 1.0  | 1.0  | 1.0  | RHOB    |
| 23221  | 1.0   | 1.0  | 2.0  | 1.0  | RHOBTB2 |
| 389    | 1.0   | 1.0  | -2.7 | 1.0  | RHOC    |
| 399    | 1.0   | 1.5  | 1.0  | 1.0  | RHOH    |
| 23433  | 1.0   | 2.5  | 1.0  | 1.0  | RHOQ    |
| 58480  | 1.0   | 1.0  | -7.3 | 1.0  | RHOU    |
| 171177 | 1.0   | 3.2  | 1.0  | 1.0  | RHOV    |
| 85415  | 1.0   | 1.0  | 1.0  | 1.0  | RHPN2   |
| 60626  | -8.6  | 1.0  | 1.0  | 1.0  | RIC8A   |
| 55188  | 1.0   | 1.0  | 1.0  | 1.0  | RIC8B   |
| 83547  | 1.0   | 1.0  | -5.6 | 1.0  | RILP    |
| 23504  | 1.0   | 1.0  | -3.4 | 1.0  | RIMBP2  |
| 85376  | 1.0   | 1.0  | 2.2  | 1.0  | RIMBP3  |
| 284716 | 1.0   | 1.0  | 1.0  | 1.0  | RIMKLA  |
| 9783   | 1.0   | 1.0  | 1.0  | 1.0  | RIMS3   |
| 60561  | 1.0   | 1.0  | -1.8 | 1.0  | RINT1   |
| 55781  | 1.0   | 1.0  | 1.0  | 1.0  | RIOK2   |
| 8780   | -1.8  | 2.1  | 3.6  | 2.8  | RIOK3   |
| 54101  | 3.7   | 1.0  | 1.0  | 4.2  | RIPK4   |
| 6016   | -1.7  | 1.0  | 1.0  | -9.0 | RIT1    |
| 6017   | 1.0   | 1.0  | 1.7  | 2.9  | RLBP1   |
| 6018   | 1.0   | 4.9  | 5.9  | 3.2  | RLF     |
| 51132  | 1.0   | 1.0  | 1.0  | 1.0  | RLIM    |
| 80010  | 1.0   | 1.0  | 1.0  | 1.0  | RMI1    |
| 116028 | -9.8  | 1.0  | 1.0  | 1.0  | RMI2    |
| 6036   | 1.6   | -2.8 | 1.0  | -4.1 | RNASE2  |
| 84659  | -12.3 | 1.0  | 1.0  | 1.0  | RNASE7  |
| 8635   | 1.0   | 1.0  | 1.0  | 1.0  | RNASET2 |
| 390    | 1.0   | 3.2  | 3.5  | 3.1  | RND3    |
| 7732   | 1.0   | 1.0  | 1.0  | 1.0  | RNF112  |
| 27246  | 1.0   | 1.0  | 1.0  | 1.0  | RNF115  |
| 55658  | 2.3   | 1.0  | -2.5 | 1.0  | RNF126  |
| 9604   | -9.5  | 1.0  | 1.0  | 1.0  | RNF14   |
| 153830 | -2.3  | 2.5  | 1.0  | 1.0  | RNF145  |
| 81847  | 1.0   | 1.0  | 1.0  | -2.9 | RNF146  |
| 284996 | 1.0   | 2.0  | 1.0  | 1.0  | RNF149  |
| 26001  | 1.0   | 1.0  | 1.0  | 4.8  | RNF167  |
| 254225 | 1.0   | 1.0  | 1.0  | 1.0  | RNF169  |
| 81790  | 1.0   | 1.0  | 1.0  | 1.0  | RNF170  |
| 149603 | 1.0   | 1.0  | 1.0  | 1.0  | RNF187  |
| 25897  | 1.7   | 2.8  | 2.6  | 1.0  | RNF19A  |
| 285498 | 1.0   | 1.0  | 2.0  | 1.0  | RNF212  |
| 57674  | 1.0   | 1.0  | 1.0  | 1.0  | RNF213  |

|        |      |      |      |       |           |
|--------|------|------|------|-------|-----------|
| 200312 | 1.0  | 1.0  | -4.1 | 1.0   | RNF215    |
| 54476  | 1.0  | 1.0  | 1.0  | 1.0   | RNF216    |
| 441191 | 4.9  | 5.3  | 5.9  | 4.8   | RNF216P1  |
| 79596  | 1.0  | 1.0  | 2.6  | 1.0   | RNF219    |
| 64320  | -3.4 | 1.0  | -3.6 | -4.0  | RNF25     |
| 140545 | -1.9 | 1.0  | 1.0  | -2.5  | RNF32     |
| 80196  | 1.0  | 2.2  | 1.0  | 1.0   | RNF34     |
| 152006 | 2.4  | 3.5  | 1.0  | 1.0   | RNF38     |
| 9810   | 1.0  | 1.0  | 1.0  | 1.0   | RNF40     |
| 6048   | 1.0  | 16.8 | 1.0  | 1.0   | RNF5      |
| 9616   | 1.0  | -2.5 | -2.5 | -2.5  | RNF7      |
| 9025   | 1.0  | 1.0  | 2.2  | 1.0   | RNF8      |
| 55178  | 1.0  | 1.0  | 1.0  | 1.5   | RNMTL1    |
| 6051   | 1.9  | 2.0  | 1.0  | 1.0   | RNPEP     |
| 267010 | 1.0  | 1.7  | 1.0  | 1.0   | RNU12     |
| 6092   | 1.0  | 1.0  | 1.0  | 1.0   | ROBO2     |
| 79641  | 1.0  | -4.3 | 1.0  | 1.0   | ROGDI     |
| 6094   | 1.0  | 1.0  | -2.5 | 1.0   | ROM1      |
| 54763  | 1.0  | 1.0  | 1.0  | 1.0   | ROPN1     |
| 83853  | 1.0  | 1.0  | -2.2 | 1.0   | ROPN1L    |
| 4919   | 1.0  | 1.0  | 1.0  | 1.0   | ROR1      |
| 4920   | 1.0  | 1.0  | 1.0  | 3.2   | ROR2      |
| 6101   | 1.0  | 1.0  | 1.0  | 1.0   | RP1       |
| 94137  | 1.0  | 1.0  | 1.0  | -7.3  | RP1L1     |
| 6102   | 1.0  | 1.0  | 1.0  | 2.6   | RP2       |
| 441212 | -2.0 | 1.0  | 1.0  | -3.9  | RP9P      |
| 6117   | 1.0  | 1.0  | 5.7  | 1.0   | RPA1      |
| 6119   | 1.0  | 1.0  | 6.0  | 1.0   | RPA3      |
| 6103   | 1.0  | -5.0 | -4.0 | 1.0   | RPGR      |
| 23322  | 1.0  | -2.6 | 1.0  | 1.0   | RPGRIP1L  |
| 9501   | 1.0  | 1.0  | 1.0  | 1.0   | RPH3AL    |
| 22934  | 1.0  | 1.0  | 2.9  | 1.0   | RPIA      |
| 6137   | 1.0  | 1.0  | 1.0  | 1.0   | RPL13     |
| 645683 | 4.0  | 1.0  | 1.0  | 1.0   | RPL13AP3  |
| 9045   | 1.6  | 1.0  | -3.8 | 1.0   | RPL14     |
| 6138   | 1.6  | 1.0  | -3.3 | 1.0   | RPL15     |
| 6144   | 1.0  | 1.0  | -5.2 | 1.0   | RPL21     |
| 402176 | 1.0  | 1.0  | 1.0  | -10.9 | RPL21P44  |
| 6146   | 1.0  | 8.6  | 2.1  | 2.8   | RPL22     |
| 9349   | 1.0  | 3.0  | 2.7  | 2.6   | RPL23     |
| 56969  | 1.0  | 1.0  | 1.0  | 1.0   | RPL23AP32 |
| 644128 | 1.0  | 1.0  | 1.0  | 1.0   | RPL23AP53 |
| 118433 | 1.0  | 1.0  | 2.9  | 1.0   | RPL23AP7  |
| 6152   | 1.0  | -3.5 | -2.9 | -3.9  | RPL24     |
| 6154   | 1.0  | 1.0  | -6.1 | 1.0   | RPL26     |
| 6159   | 2.0  | 1.0  | -4.9 | 1.0   | RPL29     |
| 6160   | 2.0  | 1.0  | -2.7 | 1.0   | RPL31     |
| 132241 | 1.0  | 1.0  | 1.0  | 1.0   | RPL32P3   |

|        |       |      |      |      |          |
|--------|-------|------|------|------|----------|
| 6170   | 1.0   | 1.0  | 1.0  | 1.0  | RPL39    |
| 6125   | 5.0   | 1.0  | 1.0  | 1.0  | RPL5     |
| 285855 | 1.0   | -2.6 | 1.0  | 1.0  | RPL7L1   |
| 10556  | 1.0   | 1.0  | 1.0  | 1.0  | RPP30    |
| 10557  | 9.8   | 1.0  | 1.0  | 1.0  | RPP38    |
| 55197  | -2.1  | 1.0  | -3.3 | 1.0  | RPRD1A   |
| 58490  | 1.0   | 1.0  | 2.6  | 1.0  | RPRD1B   |
| 6206   | 4.1   | 1.0  | 2.8  | 2.7  | RPS12    |
| 6208   | 1.0   | -2.6 | -2.6 | -6.1 | RPS14    |
| 6210   | 1.0   | 1.0  | 1.0  | 1.0  | RPS15A   |
| 6218   | 1.0   | 1.0  | 1.0  | 1.0  | RPS17    |
| 6222   | 1.0   | -2.5 | -2.6 | -2.6 | RPS18    |
| 91582  | 1.0   | 1.0  | 2.2  | 1.0  | RPS19BP1 |
| 6227   | 1.0   | 1.0  | 1.0  | 1.9  | RPS21    |
| 6228   | 1.0   | 1.0  | -3.5 | 1.0  | RPS23    |
| 6231   | 1.0   | -4.0 | -4.4 | 1.0  | RPS26    |
| 6232   | 1.9   | 2.7  | 2.6  | 2.6  | RPS27    |
| 6191   | 1.0   | 1.0  | 1.0  | 1.0  | RPS4X    |
| 6192   | 1.0   | 1.0  | 1.0  | 1.0  | RPS4Y1   |
| 140032 | 1.0   | 1.0  | 1.0  | 1.0  | RPS4Y2   |
| 6194   | 2.0   | -3.1 | -3.2 | -3.2 | RPS6     |
| 6195   | 1.0   | 1.0  | 1.0  | 1.0  | RPS6KA1  |
| 6196   | -1.6  | -5.4 | 1.0  | 1.0  | RPS6KA2  |
| 8986   | 1.0   | 1.0  | 1.0  | 1.0  | RPS6KA4  |
| 9252   | 1.0   | 1.0  | 1.0  | 1.0  | RPS6KA5  |
| 6198   | 2.4   | -2.7 | -2.5 | -2.7 | RPS6KB1  |
| 6199   | 1.0   | -2.4 | 1.0  | -2.9 | RPS6KB2  |
| 83694  | -3.0  | 1.0  | 1.0  | 1.0  | RPS6KL1  |
| 645884 | 1.8   | 1.0  | -3.6 | 1.0  | RPS7P5   |
| 6202   | 1.0   | 1.0  | 1.0  | 1.0  | RPS8     |
| 6203   | 1.0   | 1.0  | 1.0  | 1.0  | RPS9     |
| 27079  | 1.0   | 1.0  | 1.0  | 1.0  | RPUSD2   |
| 285367 | -1.6  | 1.0  | 1.0  | 1.0  | RPUSD3   |
| 22800  | 1.0   | 1.0  | 1.0  | 1.0  | RRAS2    |
| 6238   | 1.0   | -4.1 | 1.0  | 1.0  | RRBP1    |
| 6240   | 1.0   | 1.0  | 4.6  | 1.0  | RRM1     |
| 6241   | 1.0   | 1.0  | 1.0  | 1.0  | RRM2     |
| 50484  | 1.0   | 1.0  | 1.0  | -5.9 | RRM2B    |
| 54700  | 1.0   | 1.0  | 1.0  | 1.0  | RRN3     |
| 23223  | 1.0   | 1.0  | 1.0  | 1.0  | RRP12    |
| 51018  | -2.3  | 1.0  | 1.0  | 1.0  | RRP15    |
| 91543  | 1.0   | 1.0  | 1.0  | 1.0  | RSAD2    |
| 79363  | 1.0   | 1.0  | -2.8 | 2.6  | RSG1     |
| 51187  | 1.0   | 1.0  | 1.0  | 1.0  | RSL24D1  |
| 83861  | 1.0   | 1.0  | 5.7  | 5.0  | RSPH3    |
| 221421 | 1.0   | 1.0  | 1.0  | 3.1  | RSPH9    |
| 6251   | -18.0 | 1.0  | 1.0  | 1.0  | RSU1     |
| 83546  | 2.8   | 1.0  | 5.0  | 1.0  | RTBDN    |

|        |      |      |      |      |         |
|--------|------|------|------|------|---------|
| 6242   | 1.0  | 1.0  | 1.0  | 1.0  | RTKN    |
| 6253   | -4.9 | -3.2 | 1.0  | -3.1 | RTN2    |
| 146760 | 1.0  | 1.0  | 1.0  | 1.0  | RTN4RL1 |
| 132112 | -3.5 | 1.0  | 5.2  | 1.0  | RTP1    |
| 80230  | 1.0  | 1.0  | 2.4  | 1.0  | RUFY1   |
| 55680  | 1.0  | -3.6 | 1.0  | 1.0  | RUFY2   |
| 10900  | -3.5 | 1.0  | -3.0 | 1.0  | RUNDC3A |
| 861    | 1.0  | 2.8  | -2.4 | -2.4 | RUNX1   |
| 860    | 1.0  | 1.0  | -7.9 | -5.2 | RUNX2   |
| 864    | 1.0  | 1.0  | 1.0  | 1.0  | RUNX3   |
| 51389  | 1.0  | 1.0  | 1.0  | 1.0  | RWDD1   |
| 122042 | 1.0  | 1.0  | 2.4  | 1.0  | RXFP2   |
| 23429  | 1.0  | 1.0  | 1.0  | 1.0  | RYBP    |
| 6282   | 1.0  | 1.0  | 1.0  | 1.0  | S100A11 |
| 6283   | 1.0  | 1.0  | -2.5 | 1.0  | S100A12 |
| 6273   | 1.0  | 1.0  | 1.0  | 6.0  | S100A2  |
| 6275   | 1.0  | 1.0  | 1.0  | 1.0  | S100A4  |
| 338324 | 1.0  | 1.0  | 1.0  | 1.0  | S100A7A |
| 795    | 1.0  | 1.0  | -6.6 | 1.0  | S100G   |
| 9294   | -1.8 | 1.0  | 1.0  | 1.0  | S1PR2   |
| 1903   | 2.2  | 1.0  | 1.0  | 1.0  | S1PR3   |
| 8698   | 1.0  | 1.0  | 6.7  | 1.0  | S1PR4   |
| 6290   | 1.0  | 1.0  | 1.0  | 1.0  | SAA3P   |
| 113174 | -1.5 | 1.0  | 1.0  | 1.0  | SAAL1   |
| 26278  | 2.2  | 1.0  | 1.0  | 3.4  | SACS    |
| 6294   | 1.0  | 1.0  | 7.8  | 6.2  | SAFB    |
| 6297   | 1.0  | 3.8  | 2.1  | 1.0  | SALL2   |
| 57167  | 1.0  | 1.0  | 1.0  | 1.0  | SALL4   |
| 148418 | 1.0  | 1.0  | 1.0  | 1.0  | SAMD13  |
| 201191 | 1.0  | -3.3 | 1.0  | 1.0  | SAMD14  |
| 23034  | 1.9  | 1.0  | -2.6 | -3.3 | SAMD4A  |
| 55095  | 1.9  | 1.0  | 1.0  | 1.0  | SAMD4B  |
| 389432 | 1.0  | 1.0  | 1.0  | 1.0  | SAMD5   |
| 142891 | 1.0  | 1.0  | 1.0  | 1.0  | SAMD8   |
| 54809  | 1.0  | 1.0  | 1.0  | -5.7 | SAMD9   |
| 79595  | 1.0  | 1.0  | 1.0  | 1.0  | SAP130  |
| 8819   | 1.0  | 1.0  | 1.0  | 1.0  | SAP30   |
| 29115  | 1.0  | 1.0  | 1.0  | 1.0  | SAP30BP |
| 51128  | 1.0  | 1.0  | 1.0  | 1.0  | SAR1B   |
| 1757   | 1.7  | 1.0  | 2.5  | 1.0  | SARDH   |
| 23098  | -2.5 | 1.0  | 5.5  | 1.0  | SARM1   |
| 54938  | 1.0  | 1.0  | 1.0  | 1.0  | SARS2   |
| 9733   | 1.0  | 1.0  | 1.0  | 1.0  | SART3   |
| 23328  | 1.0  | 1.0  | 1.0  | 1.0  | SASH1   |
| 6303   | 1.0  | 1.0  | 1.0  | -2.6 | SAT1    |
| 6304   | 1.0  | 2.1  | 3.5  | 1.0  | SATB1   |
| 6305   | 1.0  | 1.0  | 1.0  | 1.0  | SBF1    |
| 6309   | -3.6 | -5.0 | 1.0  | -5.3 | SC5DL   |

|        |       |      |      |      |         |
|--------|-------|------|------|------|---------|
| 57466  | -2.9  | -4.2 | 1.0  | 1.0  | SCAF4   |
| 286205 | 2.3   | 1.0  | 1.0  | 1.0  | SCAI    |
| 9522   | 1.0   | 3.0  | 3.5  | 4.1  | SCAMP1  |
| 10067  | 1.0   | 1.0  | 1.0  | 1.0  | SCAMP3  |
| 54581  | -18.5 | 3.4  | 1.0  | 1.0  | SCAND2  |
| 114821 | -4.9  | 1.0  | 1.0  | 1.0  | SCAND3  |
| 49855  | 1.0   | 1.0  | 1.0  | 1.0  | SCAPER  |
| 51435  | 1.9   | -3.2 | 1.0  | 1.0  | SCARA3  |
| 949    | 2.3   | 1.0  | 1.0  | 1.0  | SCARB1  |
| 91179  | 1.0   | 1.0  | 5.4  | 1.0  | SCARF2  |
| 51097  | 4.7   | 1.0  | 1.0  | 1.0  | SCCPDH  |
| 79966  | 1.0   | 1.0  | 2.9  | 1.8  | SCD5    |
| 23256  | 1.0   | 1.0  | 1.0  | 1.0  | SCFD1   |
| 29106  | 1.0   | 1.0  | 7.0  | 1.0  | SCG3    |
| 7356   | -2.5  | 1.0  | 1.0  | 1.0  | SCGB1A1 |
| 4246   | 1.0   | 1.0  | 1.0  | -3.3 | SCGB2A1 |
| 10590  | 1.0   | 1.0  | 1.0  | 1.0  | SCGN    |
| 132320 | 1.6   | 1.0  | 2.9  | 1.0  | SCLT1   |
| 51540  | 1.0   | 1.0  | 1.0  | 1.0  | SCLY    |
| 6323   | 1.0   | 1.0  | 1.0  | 1.0  | SCN1A   |
| 6326   | -4.0  | 1.0  | -4.5 | 1.0  | SCN2A   |
| 6329   | 1.0   | 4.0  | 4.7  | 6.6  | SCN4A   |
| 6330   | 1.0   | 1.0  | 1.0  | 1.0  | SCN4B   |
| 6331   | 1.0   | 1.0  | 1.0  | 1.0  | SCN5A   |
| 6332   | -3.9  | 1.0  | 1.0  | 1.0  | SCN7A   |
| 6334   | 1.0   | -3.9 | -4.3 | 1.0  | SCN8A   |
| 6335   | 2.0   | -2.7 | 1.0  | -3.7 | SCN9A   |
| 6337   | 2.3   | -2.8 | 1.0  | -3.8 | SCNN1A  |
| 6338   | 1.0   | -4.3 | -8.5 | 1.0  | SCNN1B  |
| 6341   | 1.0   | 1.0  | 2.3  | 1.0  | SCO1    |
| 9997   | -2.0  | 1.0  | 1.0  | -3.8 | SCO2    |
| 59342  | 1.0   | 1.0  | 1.0  | 1.0  | SCPEP1  |
| 6344   | 1.0   | 1.0  | 1.0  | 1.0  | SCTR    |
| 222663 | 1.0   | 1.0  | 1.0  | 1.0  | SCUBE3  |
| 55153  | -2.0  | 1.0  | -4.5 | -8.0 | SDAD1   |
| 6382   | 1.0   | 2.5  | 1.0  | 1.0  | SDC1    |
| 6383   | 1.0   | 1.0  | -2.1 | 1.0  | SDC2    |
| 9672   | 1.0   | 1.0  | 1.0  | 1.6  | SDC3    |
| 6386   | -5.9  | 1.0  | -3.8 | 1.0  | SDCBP   |
| 27111  | 1.0   | 1.0  | 3.2  | 1.0  | SDCBP2  |
| 10807  | 1.0   | 1.0  | 1.0  | 1.0  | SDCCAG3 |
| 23753  | 1.7   | 1.0  | 1.0  | 1.0  | SDF2L1  |
| 51150  | 1.0   | 1.0  | -6.6 | 1.0  | SDF4    |
| 6389   | 1.0   | 1.0  | 1.0  | 1.0  | SDHA    |
| 54949  | 1.0   | 3.4  | 1.0  | 1.0  | SDHAF2  |
| 6390   | 23.4  | 1.0  | 1.0  | 5.5  | SDHB    |
| 6391   | 1.0   | 1.0  | 1.0  | 1.0  | SDHC    |
| 113675 | 1.0   | 3.9  | 1.0  | 1.0  | SDSL    |

|        |      |      |       |      |           |
|--------|------|------|-------|------|-----------|
| 6396   | 1.0  | -1.9 | -3.1  | 1.0  | SEC13     |
| 6397   | 1.0  | 1.0  | 1.0   | 1.0  | SEC14L1   |
| 266629 | -5.5 | -5.2 | -3.5  | -5.8 | SEC14L3   |
| 284904 | 1.0  | 1.0  | 1.0   | 2.1  | SEC14L4   |
| 89866  | 4.6  | 1.0  | -1.6  | 1.0  | SEC16B    |
| 10802  | 1.0  | 5.1  | 1.0   | 1.0  | SEC24A    |
| 25956  | 1.0  | 1.0  | 1.0   | 1.0  | SEC31B    |
| 55176  | 1.0  | 1.0  | 1.0   | 3.2  | SEC61A2   |
| 10952  | 1.0  | 1.0  | 1.0   | -2.8 | SEC61B    |
| 7095   | 1.0  | 1.0  | -2.8  | 1.0  | SEC62     |
| 9728   | 4.7  | 1.0  | 2.0   | 1.0  | SECISBP2L |
| 6398   | 1.0  | 1.0  | 1.0   | -6.7 | SECTM1    |
| 6400   | 1.0  | 1.0  | -11.8 | 1.0  | SEL1L     |
| 23231  | 1.0  | 1.0  | 1.0   | 1.0  | SEL1L3    |
| 6403   | 1.0  | 1.0  | 1.0   | 1.0  | SELP      |
| 65260  | 1.0  | 1.0  | 2.4   | 1.0  | SELRC1    |
| 51714  | 1.0  | -2.5 | 1.0   | 1.0  | SELT      |
| 348303 | 1.0  | 1.7  | 1.0   | 1.0  | SELV      |
| 6405   | 1.0  | 1.0  | 1.5   | 1.0  | SEMA3F    |
| 64218  | 1.6  | 1.0  | 1.0   | -1.8 | SEMA4A    |
| 54910  | 1.6  | 1.0  | 1.0   | 1.0  | SEMA4C    |
| 10507  | 1.5  | 1.0  | -2.0  | 1.0  | SEMA4D    |
| 54437  | 1.0  | 1.0  | 1.0   | 1.0  | SEMA5B    |
| 10501  | 2.2  | 1.0  | -2.1  | 1.0  | SEMA6B    |
| 8482   | 1.0  | 1.0  | 1.0   | 1.0  | SEMA7A    |
| 6407   | 1.0  | -3.8 | 1.0   | 1.0  | SEMG2     |
| 26054  | 2.4  | -2.5 | 1.0   | 1.0  | SENP6     |
| 57337  | 1.0  | 1.0  | 2.4   | 1.0  | SENP7     |
| 22929  | 1.0  | 1.0  | 1.0   | 1.0  | SEPHS1    |
| 285961 | 1.0  | 1.0  | 1.0   | 1.0  | SEPT7L    |
| 51734  | 1.0  | 1.0  | 1.0   | 1.0  | SEPX1     |
| 84947  | 1.0  | 1.0  | 4.5   | 1.0  | SERAC1    |
| 26135  | 1.0  | 1.0  | 1.0   | -9.0 | SERBP1    |
| 728492 | 1.0  | 1.0  | 1.0   | 1.0  | SERF1B    |
| 10169  | -4.7 | 1.0  | 1.0   | 1.0  | SERF2     |
| 26297  | 1.0  | 1.0  | -8.4  | -3.3 | SERGEF    |
| 253190 | 1.0  | 2.0  | 1.0   | 1.8  | SERHL2    |
| 10955  | 1.0  | 1.0  | 1.0   | -1.7 | SERINC3   |
| 619189 | 1.0  | 1.0  | 1.0   | 1.0  | SERINC4   |
| 256987 | 1.0  | 1.0  | 1.0   | 1.0  | SERINC5   |
| 387923 | 1.0  | 1.0  | -8.5  | -3.8 | SERP2     |
| 5265   | 1.0  | 1.0  | 2.4   | 1.0  | SERPINA1  |
| 256394 | 1.0  | 1.0  | -2.4  | 1.0  | SERPINA11 |
| 866    | 1.0  | -3.9 | -3.8  | 1.0  | SERPINA6  |
| 1992   | 1.6  | 1.0  | 1.0   | 1.0  | SERPINB1  |
| 5273   | 1.0  | -3.4 | -2.3  | 1.0  | SERPINB10 |
| 89778  | 1.0  | 1.0  | -2.9  | 1.0  | SERPINB11 |
| 89777  | 1.0  | -2.4 | -2.1  | 1.0  | SERPINB12 |

|        |       |      |       |      |           |
|--------|-------|------|-------|------|-----------|
| 5275   | 1.0   | 3.3  | 4.6   | 1.0  | SERPINB13 |
| 6317   | 1.0   | 1.0  | 1.8   | 1.0  | SERPINB3  |
| 5268   | 1.6   | 4.0  | 1.0   | 5.9  | SERPINB5  |
| 5272   | 1.0   | 1.0  | 1.0   | 3.6  | SERPINB9  |
| 5054   | 1.0   | 1.0  | 1.0   | 2.4  | SERPINE1  |
| 5270   | 1.0   | 1.0  | 4.7   | 6.1  | SERPINE2  |
| 647174 | 1.0   | 1.0  | 1.0   | 1.0  | SERPINE3  |
| 710    | 1.0   | -1.7 | -2.3  | -2.4 | SERPING1  |
| 29950  | 1.0   | 1.0  | 1.0   | 1.0  | SERTAD1   |
| 26040  | 1.0   | 1.0  | 2.3   | 1.0  | SETBP1    |
| 29072  | -1.6  | 2.7  | 3.0   | 1.0  | SETD2     |
| 84193  | 1.0   | -3.6 | -20.3 | 1.0  | SETD3     |
| 9869   | 1.0   | 4.9  | 2.5   | 1.0  | SETDB1    |
| 83852  | -15.8 | 1.0  | 3.4   | 1.0  | SETDB2    |
| 124925 | 1.0   | 1.0  | 1.0   | 1.0  | SEZ6      |
| 23544  | 1.0   | 1.0  | 1.0   | 1.0  | SEZ6L     |
| 10946  | 1.0   | 1.0  | 1.0   | 1.0  | SF3A3     |
| 23451  | 1.0   | 1.0  | 1.0   | -3.0 | SF3B1     |
| 10262  | 14.6  | 1.0  | 1.0   | 6.5  | SF3B4     |
| 9814   | 3.5   | 1.0  | 6.6   | 1.0  | SFI1      |
| 57713  | 1.0   | 1.0  | -3.7  | 1.0  | SFMBT2    |
| 6422   | 1.0   | 1.0  | 3.2   | 2.9  | SFRP1     |
| 6423   | 1.0   | 1.0  | -2.7  | 1.0  | SFRP2     |
| 113402 | 1.0   | 3.5  | 3.0   | 1.0  | SFT2D1    |
| 6439   | 3.9   | 1.0  | -2.4  | -2.9 | SFTP B    |
| 6441   | 1.6   | 1.0  | 1.0   | 1.0  | SFTPD     |
| 81855  | 15.6  | 1.0  | 1.0   | 1.0  | SFXN3     |
| 6444   | -4.6  | 2.8  | -4.0  | 2.7  | SGCD      |
| 8910   | 1.0   | 1.0  | 1.0   | -4.9 | SGCE      |
| 84251  | -5.0  | 1.0  | 1.0   | 1.0  | SGIP1     |
| 84197  | 1.0   | 1.0  | 1.0   | 1.0  | SGK196    |
| 124923 | 1.0   | 1.0  | 2.8   | 1.0  | SGK494    |
| 151648 | 1.0   | 1.7  | 1.0   | 1.0  | SGOL1     |
| 81537  | -2.5  | 1.0  | -1.9  | 1.0  | SGPP1     |
| 130367 | 1.0   | 1.0  | 4.1   | 1.0  | SGPP2     |
| 9905   | 1.0   | 2.6  | 1.0   | 1.0  | SGSM2     |
| 10603  | 2.9   | -2.7 | 1.0   | 1.0  | SH2B2     |
| 117157 | 1.0   | 1.0  | 1.0   | 1.0  | SH2D1B    |
| 387694 | 1.0   | 1.0  | 1.0   | 1.0  | SH2D4B    |
| 6452   | 1.8   | 1.0  | 1.0   | -4.2 | SH3BP2    |
| 23677  | -2.0  | 2.8  | 1.8   | 3.0  | SH3BP4    |
| 80851  | 1.0   | 1.0  | 1.0   | 1.0  | SH3BP5L   |
| 6457   | 1.0   | 1.0  | 1.0   | 1.0  | SH3GL3    |
| 56904  | -1.5  | 1.0  | 1.0   | -1.9 | SH3GLB2   |
| 30011  | 1.0   | -4.5 | 4.6   | -6.2 | SH3KBP1   |
| 9644   | 1.0   | 1.0  | -1.7  | 1.0  | SH3PXD2A  |
| 285590 | 1.0   | 1.0  | 1.0   | 1.0  | SH3PXD2B  |
| 153769 | 1.0   | 1.0  | -3.4  | 1.0  | SH3RF2    |



|        |       |      |      |      |          |
|--------|-------|------|------|------|----------|
| 344558 | 1.0   | 1.0  | 9.0  | 1.0  | SH3RF3   |
| 54436  | 1.0   | 1.0  | 1.8  | 1.0  | SH3TC1   |
| 79628  | 1.0   | 1.0  | 1.0  | 1.0  | SH3TC2   |
| 50944  | 1.0   | 4.8  | 1.0  | 2.9  | SHANK1   |
| 22941  | 1.0   | 1.0  | 1.0  | 5.5  | SHANK2   |
| 81858  | 1.0   | 1.0  | 1.0  | 1.0  | SHARPIN  |
| 6461   | 1.0   | 1.0  | 1.0  | -3.6 | SHB      |
| 6462   | -5.5  | 1.0  | 1.0  | 1.0  | SHBG     |
| 81626  | 1.0   | 1.0  | 1.0  | 1.0  | SHCBP1L  |
| 149345 | 1.7   | 1.0  | 1.0  | -2.8 | SHISA4   |
| 51246  | 1.0   | 1.0  | 1.0  | 1.0  | SHISA5   |
| 388336 | 1.0   | 1.0  | 1.0  | 1.0  | SHISA6   |
| 6470   | 2.1   | 1.0  | 1.0  | 1.0  | SHMT1    |
| 6472   | 1.0   | 1.0  | 5.0  | 1.0  | SHMT2    |
| 8036   | 1.0   | 1.0  | 1.0  | 1.0  | SHOC2    |
| 6474   | 1.0   | -4.0 | -3.8 | -3.8 | SHOX2    |
| 23729  | 1.0   | 1.0  | 1.0  | 1.0  | SHPK     |
| 134549 | 1.0   | 1.0  | -2.8 | 3.4  | SHROOM1  |
| 57619  | 1.0   | 1.0  | -5.8 | -2.7 | SHROOM3  |
| 57477  | -1.7  | 1.0  | 1.0  | 1.0  | SHROOM4  |
| 6476   | -12.8 | 1.0  | 1.0  | 1.0  | SI       |
| 6477   | -3.9  | 1.0  | 1.0  | 1.0  | SIAH1    |
| 6478   | 1.9   | 1.0  | 1.8  | 1.0  | SIAH2    |
| 54847  | 1.0   | 5.0  | 1.0  | 1.0  | SIDT1    |
| 51092  | 1.0   | 1.0  | 4.6  | 5.1  | SIDT2    |
| 946    | 1.0   | 1.0  | 1.0  | 1.0  | SIGLEC6  |
| 27181  | 1.0   | 1.9  | 1.0  | 1.0  | SIGLEC8  |
| 284367 | 1.0   | 1.0  | 1.0  | 1.0  | SIGLECP3 |
| 80143  | 1.0   | 15.2 | 1.0  | 1.0  | SIKE1    |
| 64374  | 1.0   | 1.0  | 1.0  | 1.0  | SIL1     |
| 57568  | 1.0   | 1.0  | 1.0  | 1.0  | SIPA1L2  |
| 10326  | 1.0   | 1.0  | -4.3 | -7.8 | SIRPB1   |
| 284759 | 2.1   | 1.0  | 1.0  | 3.8  | SIRPB2   |
| 128646 | 12.4  | -4.3 | 1.0  | -5.4 | SIRPD    |
| 55423  | 1.0   | 1.0  | 1.0  | -2.1 | SIRPG    |
| 23408  | 1.0   | 1.0  | 1.0  | 1.0  | SIRT5    |
| 10572  | 1.0   | 1.0  | 1.0  | 4.0  | SIVA1    |
| 6496   | 1.0   | 1.0  | 1.0  | 1.0  | SIX3     |
| 4990   | 1.0   | 2.9  | 2.7  | 1.0  | SIX6     |
| 348235 | 1.0   | 1.0  | 1.0  | 1.0  | SKA2     |
| 8631   | 1.0   | 1.0  | 1.0  | 1.0  | SKAP1    |
| 6499   | 2.2   | 1.0  | 1.0  | 1.0  | SKIV2L   |
| 6500   | 1.0   | -2.4 | -2.5 | 1.0  | SKP1     |
| 6502   | 1.0   | 2.3  | 7.1  | 1.0  | SKP2     |
| 6503   | 1.0   | 2.7  | 1.6  | 1.0  | SLA      |
| 6504   | 1.0   | 1.0  | 2.5  | 1.0  | SLAMF1   |
| 114836 | 1.0   | 1.0  | 1.0  | 1.0  | SLAMF6   |
| 7884   | 1.0   | 1.0  | 1.0  | 1.0  | SLBP     |

|        |      |      |       |      |            |
|--------|------|------|-------|------|------------|
| 6560   | 1.0  | 1.0  | 3.0   | 1.0  | SLC12A4    |
| 57468  | 1.0  | 1.0  | 1.0   | 1.0  | SLC12A5    |
| 10723  | 1.0  | 3.6  | 3.1   | 1.0  | SLC12A7    |
| 56996  | 2.1  | 1.0  | 1.0   | 1.0  | SLC12A9    |
| 9058   | -2.7 | -3.4 | -3.2  | 1.0  | SLC13A2    |
| 284111 | 1.0  | 5.6  | 5.9   | 1.0  | SLC13A5    |
| 6563   | 1.0  | 1.0  | -10.8 | 1.0  | SLC14A1    |
| 117247 | 1.0  | -2.4 | 1.0   | 1.0  | SLC16A10   |
| 9121   | 1.0  | 1.0  | 2.8   | 1.0  | SLC16A5    |
| 9194   | -1.9 | 1.0  | 1.0   | -6.2 | SLC16A7    |
| 10246  | 1.0  | 1.0  | 1.0   | 1.0  | SLC17A2    |
| 10786  | 1.0  | 1.0  | 1.0   | 9.9  | SLC17A3    |
| 26503  | 1.0  | 3.4  | -3.4  | 1.0  | SLC17A5    |
| 63910  | 1.0  | 1.0  | -14.5 | -9.7 | SLC17A9    |
| 6570   | 1.0  | 3.8  | 1.0   | 1.0  | SLC18A1    |
| 6506   | 1.0  | 1.0  | -7.9  | 1.0  | SLC1A2     |
| 6580   | 1.0  | 1.0  | 1.0   | 1.0  | SLC22A1    |
| 387775 | 1.0  | 4.8  | 3.7   | 2.9  | SLC22A10   |
| 116085 | 1.0  | 1.0  | 1.0   | -4.5 | SLC22A12   |
| 55356  | 5.6  | 1.0  | 9.5   | 9.0  | SLC22A15   |
| 5003   | 1.0  | 1.0  | 1.0   | 1.0  | SLC22A18AS |
| 6582   | 1.0  | 1.0  | -5.5  | 1.0  | SLC22A2    |
| 283238 | 1.0  | 1.0  | 4.6   | 4.7  | SLC22A24   |
| 6583   | 1.0  | 1.0  | 1.0   | -5.4 | SLC22A4    |
| 114571 | 1.0  | 1.0  | 1.0   | 1.0  | SLC22A9    |
| 9963   | 1.0  | 1.0  | 1.0   | 1.0  | SLC23A1    |
| 9187   | 1.0  | 1.0  | 2.5   | 1.0  | SLC24A1    |
| 25769  | 1.0  | 1.0  | -5.9  | -6.2 | SLC24A2    |
| 123041 | 1.0  | 1.0  | 1.0   | 1.0  | SLC24A4    |
| 8402   | 1.0  | 1.0  | 1.0   | 1.0  | SLC25A11   |
| 10166  | 1.0  | 1.0  | 1.0   | 1.0  | SLC25A15   |
| 10478  | 1.0  | 1.0  | 1.0   | 1.0  | SLC25A17   |
| 788    | 1.0  | 1.9  | 1.0   | 1.0  | SLC25A20   |
| 115286 | 1.0  | 1.0  | 1.0   | 1.0  | SLC25A26   |
| 81034  | 4.8  | 1.0  | -5.6  | 1.0  | SLC25A32   |
| 51312  | 1.0  | 1.0  | 3.2   | 1.0  | SLC25A37   |
| 284427 | 1.0  | 1.8  | 1.0   | 2.9  | SLC25A41   |
| 284439 | 1.0  | 1.0  | 1.0   | 1.0  | SLC25A42   |
| 284129 | 1.0  | 1.0  | 2.7   | 1.0  | SLC26A11   |
| 1811   | 1.0  | 4.3  | 4.1   | 4.5  | SLC26A3    |
| 376497 | 1.0  | 1.8  | 1.0   | 4.5  | SLC27A1    |
| 11001  | 1.0  | 1.0  | 1.0   | 1.0  | SLC27A2    |
| 11000  | 1.0  | -4.8 | 1.0   | 1.0  | SLC27A3    |
| 9154   | 1.0  | -3.7 | -3.8  | 1.0  | SLC28A1    |
| 64078  | -1.7 | 1.0  | -6.4  | 1.0  | SLC28A3    |
| 55315  | 1.5  | 1.0  | 3.0   | 3.6  | SLC29A3    |
| 222962 | 1.6  | 3.0  | 1.0   | 1.0  | SLC29A4    |
| 66035  | 1.0  | 1.0  | 1.0   | 1.0  | SLC2A11    |

|        |      |      |      |      |          |
|--------|------|------|------|------|----------|
| 154091 | 1.0  | 1.0  | 2.3  | 1.0  | SLC2A12  |
| 144195 | 1.0  | 1.0  | 4.1  | 3.3  | SLC2A14  |
| 6518   | 1.0  | 1.0  | 1.0  | 1.0  | SLC2A5   |
| 11182  | 1.0  | 1.0  | 1.0  | 1.0  | SLC2A6   |
| 56606  | 1.0  | 1.0  | 1.0  | 1.9  | SLC2A9   |
| 7779   | 1.0  | 1.0  | 1.0  | 1.0  | SLC30A1  |
| 64924  | 1.0  | -3.9 | -5.0 | 1.0  | SLC30A5  |
| 169026 | 1.0  | 1.0  | 1.0  | 1.0  | SLC30A8  |
| 1317   | 1.0  | 1.0  | -2.4 | -2.5 | SLC31A1  |
| 1318   | 1.0  | 1.0  | 2.9  | 1.0  | SLC31A2  |
| 9197   | 1.0  | 1.0  | 1.0  | 1.0  | SLC33A1  |
| 10568  | 1.0  | 1.0  | 4.8  | 1.0  | SLC34A2  |
| 10559  | 5.7  | 1.0  | 1.0  | 3.8  | SLC35A1  |
| 23443  | -1.7 | 1.0  | 1.0  | 1.0  | SLC35A3  |
| 347734 | 1.0  | 1.0  | 1.0  | 1.0  | SLC35B2  |
| 55343  | 1.0  | 1.0  | 1.0  | 1.0  | SLC35C1  |
| 340146 | 1.0  | 1.0  | 1.0  | 1.0  | SLC35D3  |
| 9906   | 1.0  | 1.0  | 1.0  | 2.4  | SLC35E2  |
| 55508  | 1.0  | 5.0  | 1.0  | 1.0  | SLC35E3  |
| 339665 | -1.5 | -2.9 | 1.0  | 1.0  | SLC35E4  |
| 222553 | 1.0  | 1.0  | 1.0  | 1.0  | SLC35F1  |
| 80255  | 1.0  | 1.0  | 1.0  | 2.2  | SLC35F5  |
| 285641 | 1.0  | 1.0  | 1.0  | 1.0  | SLC36A3  |
| 219855 | 1.0  | 3.1  | 2.7  | 1.0  | SLC37A2  |
| 124565 | 1.0  | 1.0  | 1.0  | 1.0  | SLC38A10 |
| 54407  | 1.0  | -2.7 | 1.0  | 1.0  | SLC38A2  |
| 57181  | 1.0  | 1.0  | 1.0  | -2.1 | SLC39A10 |
| 283375 | 1.0  | -4.3 | -4.2 | 1.0  | SLC39A5  |
| 64116  | 1.0  | -3.5 | -5.1 | -7.4 | SLC39A8  |
| 6519   | 1.0  | 1.0  | 1.0  | 1.0  | SLC3A1   |
| 54946  | 1.6  | 1.0  | 1.0  | 1.0  | SLC41A3  |
| 23446  | 2.9  | 1.0  | 1.0  | -2.5 | SLC44A1  |
| 57153  | 1.0  | 1.0  | 3.8  | 1.0  | SLC44A2  |
| 126969 | 1.0  | -2.9 | 1.0  | 1.0  | SLC44A3  |
| 204962 | 1.0  | 1.0  | 1.0  | 1.0  | SLC44A5  |
| 51151  | 1.0  | 1.0  | 1.0  | 1.0  | SLC45A2  |
| 283537 | 1.0  | 1.0  | 1.0  | 1.0  | SLC46A3  |
| 146802 | 1.0  | 1.0  | -5.7 | -6.7 | SLC47A2  |
| 6521   | 1.0  | 1.0  | 1.0  | -5.5 | SLC4A1   |
| 83959  | 1.0  | 1.0  | 1.0  | 1.0  | SLC4A11  |
| 22950  | 1.0  | 1.0  | 1.0  | 1.0  | SLC4A1AP |
| 6522   | 1.0  | 1.6  | 1.0  | 1.0  | SLC4A2   |
| 6508   | -8.4 | 1.0  | -3.5 | 1.0  | SLC4A3   |
| 57835  | 1.0  | -3.5 | -4.5 | -5.0 | SLC4A5   |
| 9497   | 1.0  | 3.0  | 4.7  | 3.4  | SLC4A7   |
| 9498   | 1.0  | 3.5  | 1.0  | 1.0  | SLC4A8   |
| 55974  | -2.2 | -4.8 | 1.0  | 1.0  | SLC50A1  |
| 6523   | 1.0  | 1.0  | 1.0  | 1.9  | SLC5A1   |

|        |       |      |      |      |           |
|--------|-------|------|------|------|-----------|
| 159963 | 1.8   | 1.0  | 1.0  | 1.0  | SLC5A12   |
| 6526   | 1.0   | 2.5  | 1.0  | 1.0  | SLC5A3    |
| 6527   | 1.0   | 1.0  | 1.0  | 1.0  | SLC5A4    |
| 60482  | 1.0   | 1.0  | 1.0  | 1.0  | SLC5A7    |
| 6540   | -5.2  | 1.0  | 2.9  | 1.0  | SLC6A13   |
| 55117  | -2.8  | 1.0  | 1.0  | 1.0  | SLC6A15   |
| 6532   | 1.6   | 1.0  | -2.7 | -2.6 | SLC6A4    |
| 6533   | 1.6   | -2.6 | 1.0  | 1.0  | SLC6A6    |
| 6535   | 1.0   | 1.0  | 1.0  | 1.0  | SLC6A8    |
| 84889  | 1.0   | 1.0  | 1.0  | -2.7 | SLC7A3    |
| 6545   | 1.0   | 2.8  | 1.0  | 1.0  | SLC7A4    |
| 23428  | 1.0   | 2.7  | 5.0  | 4.1  | SLC7A8    |
| 6546   | 1.6   | -2.9 | -3.4 | -2.8 | SLC8A1    |
| 6543   | 1.0   | 1.0  | 1.0  | 1.0  | SLC8A2    |
| 6548   | 1.0   | 1.0  | 1.0  | 1.0  | SLC9A1    |
| 285335 | 1.0   | -2.1 | -1.8 | 1.0  | SLC9A10   |
| 9351   | -1.9  | 1.0  | 1.0  | 1.0  | SLC9A3R2  |
| 84679  | 1.0   | 1.0  | 1.0  | 1.0  | SLC9A7    |
| 53919  | 1.0   | -2.7 | -3.1 | 1.0  | SLCO1C1   |
| 28232  | 1.0   | 5.4  | 1.0  | 1.0  | SLCO3A1   |
| 353189 | 1.0   | 3.8  | 1.0  | 3.9  | SLCO4C1   |
| 81796  | 1.0   | 1.9  | 1.0  | 2.7  | SLCO5A1   |
| 162394 | 1.0   | -3.9 | -4.4 | -4.5 | SLFN5     |
| 114798 | 1.0   | -3.4 | -3.6 | 1.0  | SLITRK1   |
| 84631  | 1.0   | -3.8 | 1.0  | -6.3 | SLITRK2   |
| 139065 | 1.0   | 1.0  | -3.2 | 1.0  | SLITRK4   |
| 26050  | 1.0   | 1.0  | 3.0  | 1.0  | SLITRK5   |
| 84189  | 1.0   | 1.0  | 1.0  | 1.0  | SLITRK6   |
| 9748   | 1.0   | 1.0  | 1.0  | 1.0  | SLK       |
| 7871   | 1.0   | 1.0  | 1.0  | 1.0  | SLMAP     |
| 51012  | 1.0   | 1.0  | 2.5  | 1.0  | SLMO2     |
| 84464  | 1.8   | 1.0  | 1.0  | 1.0  | SLX4      |
| 4088   | 1.0   | 1.0  | 2.5  | 1.0  | SMAD3     |
| 9597   | 1.0   | 1.0  | -1.5 | 1.0  | SMAD5-AS1 |
| 4091   | 1.0   | 1.0  | 1.0  | 1.0  | SMAD6     |
| 4092   | 1.0   | 1.0  | 1.0  | 5.9  | SMAD7     |
| 4093   | 5.7   | 1.0  | 3.1  | 1.0  | SMAD9     |
| 6594   | 1.0   | 2.7  | 3.1  | 1.0  | SMARCA1   |
| 6595   | 1.0   | 1.0  | 1.0  | 1.0  | SMARCA2   |
| 56916  | 1.0   | 2.3  | 1.0  | 2.1  | SMARCA1   |
| 6602   | -14.6 | 3.3  | 1.0  | 2.6  | SMARCD1   |
| 6603   | 1.0   | 1.0  | 4.4  | 1.0  | SMARCD2   |
| 6605   | 1.0   | 1.0  | -3.0 | 1.0  | SMARCE1   |
| 8243   | 1.0   | 1.0  | 1.0  | -6.2 | SMC1A     |
| 10592  | -2.6  | 1.0  | -2.4 | -1.6 | SMC2      |
| 23137  | -7.2  | 1.0  | 1.0  | 1.0  | SMC5      |
| 23347  | 1.0   | 1.0  | 1.0  | 1.0  | SMCHD1    |
| 140771 | 1.0   | 1.0  | -7.5 | 1.0  | SMCR5     |

|           |      |       |      |       |         |
|-----------|------|-------|------|-------|---------|
| 54471     | 1.0  | 1.0   | 1.0  | 1.0   | SMCR7L  |
| 140775    | 1.0  | 1.0   | 1.0  | 1.0   | SMCR8   |
| 23049     | 1.0  | 1.0   | 1.0  | 2.5   | SMG1    |
| 23381     | 1.0  | 1.0   | -4.9 | 1.0   | SMG5    |
| 56006     | 1.0  | 1.0   | 1.0  | 1.0   | SMG9    |
| 6606      | 1.0  | 1.0   | 1.0  | 1.0   | SMN1    |
| 6607      | 1.0  | -5.7  | -5.4 | 1.0   | SMN2    |
| 6608      | 1.0  | 1.0   | 1.0  | 1.0   | SMO     |
| 54498     | 1.0  | 1.0   | 1.0  | 1.0   | SMOX    |
| 55627     | 1.0  | 2.2   | 1.0  | 1.0   | SMPD4   |
| 10879     | 1.0  | -5.4  | 1.0  | 1.0   | SMR3B   |
| 6525      | -2.0 | -10.1 | 1.0  | -10.6 | SMTN    |
| 55234     | 1.0  | 1.0   | 1.0  | 1.0   | SMU1    |
| 10322     | -3.1 | 1.0   | 1.0  | -6.7  | SMYD5   |
| 6591      | 1.0  | 1.0   | 4.2  | 1.0   | SNAI2   |
| 333929    | 1.0  | 1.0   | 1.0  | 1.0   | SNAI3   |
| 8773      | 1.7  | 1.0   | -3.6 | 1.0   | SNAP23  |
| 9342      | 1.0  | 1.0   | 1.0  | -7.6  | SNAP29  |
| 116841    | 1.0  | 1.0   | 4.7  | 1.0   | SNAP47  |
| 9892      | 2.0  | 1.0   | 1.5  | 1.0   | SNAP91  |
| 6617      | 2.1  | 1.0   | 1.0  | 1.0   | SNAPC1  |
| 6621      | 1.0  | 1.0   | 4.7  | 1.0   | SNAPC4  |
| 6622      | 1.0  | 2.5   | 2.2  | 2.8   | SNCA    |
| 9627      | 1.0  | -3.9  | 1.0  | 1.0   | SNCAIP  |
| 25992     | 1.0  | 1.0   | 1.0  | 1.0   | SNED1   |
| 23642     | 1.0  | 1.0   | 1.0  | 1.0   | SNHG1   |
| 283596    | 1.0  | 1.0   | 1.0  | 1.0   | SNHG10  |
| 100093630 | 1.0  | 1.0   | 1.0  | 1.0   | SNHG8   |
| 79622     | 2.0  | -4.5  | -4.5 | -4.5  | SNRNP25 |
| 11066     | 1.0  | 1.0   | 1.0  | 1.0   | SNRNP35 |
| 9410      | 1.0  | -3.0  | 1.0  | 1.0   | SNRNP40 |
| 154007    | 1.0  | 1.0   | 1.0  | 1.0   | SNRNP48 |
| 6628      | 1.0  | -2.7  | 1.0  | 1.0   | SNRPB   |
| 6631      | 1.0  | 2.7   | 1.0  | 3.2   | SNRPC   |
| 6632      | 1.0  | -2.3  | 1.0  | 1.0   | SNRPD1  |
| 6634      | 1.0  | 1.0   | 1.0  | 1.0   | SNRPD3  |
| 6635      | 1.0  | 1.0   | 3.0  | 1.0   | SNRPE   |
| 6637      | 1.0  | 2.4   | 1.0  | 1.0   | SNRPG   |
| 6638      | 1.0  | 1.0   | 1.0  | 1.0   | SNRPN   |
| 6640      | 1.0  | 1.0   | 1.0  | 1.0   | SNTA1   |
| 6641      | 1.0  | 1.0   | 1.0  | 1.0   | SNTB1   |
| 54212     | 1.0  | -4.2  | -4.2 | -5.3  | SNTG1   |
| 29887     | 1.0  | 1.0   | -3.8 | 1.0   | SNX10   |
| 23161     | 1.6  | 1.0   | -1.7 | 1.0   | SNX13   |
| 57231     | 1.0  | 1.0   | 1.0  | 1.0   | SNX14   |
| 399979    | 1.6  | 1.0   | 1.0  | 3.5   | SNX19   |
| 90203     | 1.0  | 1.0   | 1.0  | 1.0   | SNX21   |
| 83891     | 1.0  | 1.0   | 2.8  | 1.0   | SNX25   |

|        |       |      |      |      |         |
|--------|-------|------|------|------|---------|
| 92017  | 1.0   | 1.0  | 3.0  | 3.0  | SNX29   |
| 8724   | 1.0   | 1.0  | 1.0  | 1.0  | SNX3    |
| 58533  | 1.0   | 1.0  | 1.0  | 1.0  | SNX6    |
| 8435   | 1.0   | 1.0  | 3.9  | 1.0  | SOAT2   |
| 55084  | 1.0   | 1.0  | 1.0  | 1.0  | SOBP    |
| 54937  | 1.8   | 1.0  | -1.8 | 1.0  | SOHLH2  |
| 6650   | 2.1   | 1.0  | 1.0  | 1.0  | SOLH    |
| 6651   | 3.2   | 1.0  | 1.0  | 1.0  | SON     |
| 10580  | 1.0   | 1.0  | 1.0  | 1.0  | SORBS1  |
| 114815 | 1.0   | 1.0  | -5.2 | 1.0  | SORCS1  |
| 22986  | 1.0   | 1.0  | 1.0  | 1.0  | SORCS3  |
| 6654   | 4.9   | 1.0  | 1.0  | 3.3  | SOS1    |
| 50964  | 1.0   | 1.0  | -3.3 | 1.0  | SOST    |
| 6666   | 1.0   | 1.9  | 1.0  | 1.0  | SOX12   |
| 9580   | 1.0   | 1.0  | 1.0  | -3.0 | SOX13   |
| 8403   | 4.5   | 8.8  | 1.0  | 1.0  | SOX14   |
| 64321  | 1.0   | 1.0  | 1.0  | 1.0  | SOX17   |
| 54345  | 20.2  | 3.2  | 1.0  | -2.8 | SOX18   |
| 347689 | 1.0   | 1.0  | 1.0  | 1.0  | SOX2-OT |
| 6658   | 2.2   | 1.0  | 2.6  | 1.0  | SOX3    |
| 11063  | 1.0   | 1.0  | 1.0  | 1.0  | SOX30   |
| 6659   | 2.6   | 1.0  | 1.0  | 1.0  | SOX4    |
| 6660   | 2.3   | 1.0  | -6.6 | 1.0  | SOX5    |
| 83595  | 1.0   | 1.0  | -5.2 | 1.0  | SOX7    |
| 3431   | 1.0   | 1.0  | 1.0  | 1.0  | SP110   |
| 11262  | -1.7  | 1.0  | -3.3 | 1.0  | SP140   |
| 6670   | 116.7 | 1.0  | 1.0  | 1.0  | SP3     |
| 124912 | 1.0   | 1.0  | 1.0  | 1.0  | SPACA3  |
| 389852 | 5.9   | 2.1  | 1.8  | 2.0  | SPACA5  |
| 79582  | 1.0   | 1.0  | 1.0  | 1.0  | SPAG16  |
| 6676   | 1.0   | 1.0  | 4.6  | 5.7  | SPAG4   |
| 26206  | 1.0   | 1.0  | 1.0  | 1.0  | SPAG8   |
| 6677   | 1.0   | 1.0  | 1.0  | 1.0  | SPAM1   |
| 30014  | 1.0   | 1.0  | -5.9 | -3.9 | SPANXA1 |
| 139067 | 3.9   | -4.6 | -6.4 | -1.9 | SPANXN3 |
| 6678   | 1.0   | 3.7  | 3.9  | 1.0  | SPARC   |
| 221178 | 1.0   | 4.8  | 1.0  | 1.0  | SPATA13 |
| 132671 | -5.6  | 1.0  | 1.0  | -2.4 | SPATA18 |
| 124044 | 1.0   | 1.0  | -3.4 | 1.0  | SPATA2L |
| 132851 | 1.0   | 1.0  | 1.0  | 1.0  | SPATA4  |
| 55812  | 1.0   | 2.8  | 1.0  | 1.0  | SPATA7  |
| 145946 | -19.6 | 1.0  | 1.0  | 2.0  | SPATA8  |
| 83890  | -33.8 | 1.0  | 1.0  | 1.0  | SPATA9  |
| 221409 | -1.7  | 1.0  | 1.0  | -2.6 | SPATS1  |
| 65244  | 1.0   | 1.0  | 1.0  | 3.9  | SPATS2  |
| 441273 | 2.1   | -4.4 | 1.0  | 1.0  | SPDYE2  |
| 441272 | -5.1  | 1.0  | -7.2 | 1.0  | SPDYE3  |
| 92521  | -7.1  | 2.8  | 3.8  | 1.0  | SPECC1  |

|        |       |      |      |      |          |
|--------|-------|------|------|------|----------|
| 23384  | 1.0   | 1.0  | 1.0  | 1.0  | SPECC1L  |
| 374768 | 2.4   | 1.0  | 1.0  | 1.0  | SPEM1    |
| 56848  | 1.0   | 1.0  | 1.0  | 1.0  | SPHK2    |
| 6688   | 1.0   | 1.0  | 5.0  | 1.0  | SPI1     |
| 6689   | -1.7  | 6.2  | 1.0  | 1.0  | SPIB     |
| 10927  | 1.0   | -7.2 | -5.7 | 1.0  | SPIN1    |
| 139886 | 1.0   | 1.0  | 1.0  | 1.0  | SPIN4    |
| 11005  | -11.0 | 1.0  | 1.0  | 1.0  | SPINK5   |
| 10653  | 1.0   | 1.0  | 1.0  | 1.0  | SPINT2   |
| 56907  | 1.0   | 1.0  | 1.0  | 1.0  | SPIRE1   |
| 6693   | 1.0   | 1.0  | 1.0  | 1.0  | SPN      |
| 83985  | 1.6   | 1.0  | 1.0  | 1.0  | SPNS1    |
| 23626  | 1.7   | 1.0  | 1.0  | 1.0  | SPO11    |
| 9806   | 4.6   | 1.0  | 1.0  | -6.4 | SPOCK2   |
| 10417  | 1.0   | 1.0  | 1.0  | 1.0  | SPON2    |
| 6694   | 1.0   | 1.0  | 1.0  | 1.0  | SPP2     |
| 84888  | 1.0   | 1.0  | 1.0  | 1.0  | SPPL2A   |
| 56928  | 1.0   | 1.0  | -8.9 | 1.0  | SPPL2B   |
| 121665 | 5.8   | 3.7  | 1.0  | 1.0  | SPPL3    |
| 503542 | 2.0   | 1.0  | 4.6  | 1.0  | SPRN     |
| 6698   | 1.9   | 5.2  | 1.0  | 1.0  | SPRR1A   |
| 6699   | 3.0   | 1.0  | 1.0  | 1.0  | SPRR1B   |
| 6704   | 8.7   | 1.0  | 1.0  | 1.0  | SPRR2E   |
| 163778 | -1.8  | -1.8 | 1.0  | -3.3 | SPRR4    |
| 90864  | -4.2  | 1.0  | 1.0  | 1.0  | SPSB3    |
| 6710   | 1.0   | 1.0  | 1.0  | 4.4  | SPTB     |
| 6711   | 1.0   | 1.0  | 1.0  | 1.0  | SPTBN1   |
| 10558  | 1.0   | 1.0  | 1.0  | 1.0  | SPTLC1   |
| 9517   | 1.0   | 1.0  | -1.8 | -3.3 | SPTLC2   |
| 55304  | 1.6   | 1.0  | 1.0  | 1.0  | SPTLC3   |
| 58472  | 1.0   | 1.0  | 1.0  | 1.0  | SQRDL    |
| 10847  | 1.0   | 1.0  | 4.3  | 1.0  | SRCAP    |
| 80725  | 3.9   | 1.0  | 1.0  | 1.0  | SRCIN1   |
| 6716   | 1.0   | 1.0  | 1.0  | 2.5  | SRD5A2   |
| 285672 | -2.4  | 1.0  | 1.0  | 1.0  | SREK1IP1 |
| 6722   | -2.1  | -3.9 | -3.7 | -3.2 | SRF      |
| 23380  | -2.9  | 1.0  | 1.0  | 1.0  | SRGAP2   |
| 6728   | -1.7  | 1.0  | -2.4 | 1.0  | SRP19    |
| 6730   | 1.0   | 1.0  | 1.0  | 1.0  | SRP68    |
| 26576  | 1.0   | 1.0  | 1.0  | 1.0  | SRPK3    |
| 8406   | 1.0   | 1.0  | 4.8  | 1.0  | SRPX     |
| 23524  | 1.0   | -5.7 | 1.0  | 1.0  | SRRM2    |
| 222183 | 1.0   | 1.0  | 1.0  | -3.8 | SRRM3    |
| 9295   | 1.0   | 1.0  | 1.6  | 1.7  | SRSF11   |
| 6428   | 1.5   | -3.3 | -3.3 | -3.3 | SRSF3    |
| 6429   | 1.0   | 1.0  | 1.0  | 1.0  | SRSF4    |
| 6431   | 1.0   | -2.6 | 1.0  | -2.6 | SRSF6    |
| 8683   | -1.9  | -2.7 | -2.4 | 1.0  | SRSF9    |

|        |       |      |      |      |            |
|--------|-------|------|------|------|------------|
| 140809 | 1.0   | 1.0  | 2.7  | 1.0  | SRXN1      |
| 6760   | 1.0   | 1.0  | 1.0  | 1.0  | SS18       |
| 51188  | 1.0   | 1.0  | -5.0 | 1.0  | SS18L2     |
| 6741   | 1.6   | 1.0  | 1.0  | 1.6  | SSB        |
| 6742   | 1.0   | -2.6 | -3.0 | -3.2 | SSBP1      |
| 23635  | -5.8  | 1.0  | 1.0  | 1.0  | SSBP2      |
| 284297 | 2.0   | 1.0  | -3.3 | 1.0  | SSC5D      |
| 23145  | 2.4   | -4.5 | -6.9 | -9.6 | SSPO       |
| 10534  | 1.7   | 1.0  | 1.0  | 1.0  | SSSCA1     |
| 6752   | 1.0   | 1.0  | 1.0  | 1.0  | SSTR2      |
| 6754   | 1.0   | 1.0  | 3.5  | 1.0  | SSTR4      |
| 29101  | 2.1   | 1.0  | 1.0  | 1.0  | SSU72      |
| 10214  | 1.0   | 1.0  | 1.0  | 1.0  | SSX3       |
| 280658 | 1.0   | 1.0  | 1.0  | 1.0  | SSX7       |
| 6484   | 1.0   | 1.0  | 1.0  | 1.0  | ST3GAL4    |
| 8869   | 1.0   | 1.0  | 1.0  | 1.0  | ST3GAL5    |
| 6764   | 1.0   | 4.6  | 4.6  | 1.0  | ST5        |
| 55808  | -3.2  | 1.0  | 1.0  | 1.0  | ST6GALNAC1 |
| 10610  | 1.0   | 1.0  | 1.0  | 1.0  | ST6GALNAC2 |
| 256435 | 1.0   | 1.0  | 1.0  | 1.0  | ST6GALNAC3 |
| 81849  | -46.3 | 1.0  | 1.0  | 1.0  | ST6GALNAC5 |
| 30815  | 1.0   | 1.0  | 1.0  | 1.0  | ST6GALNAC6 |
| 7982   | 1.0   | 1.0  | 1.0  | 1.0  | ST7        |
| 93653  | 1.0   | 1.0  | 1.0  | 1.0  | ST7-AS1    |
| 54879  | -6.4  | 1.0  | 1.0  | 1.0  | ST7L       |
| 8128   | 1.0   | 1.0  | 1.0  | 1.0  | ST8SIA2    |
| 246329 | 1.0   | 1.0  | 1.0  | -5.0 | STAC3      |
| 10735  | 1.0   | 1.0  | 1.0  | 1.0  | STAG2      |
| 10734  | -1.6  | 1.0  | 2.0  | 1.0  | STAG3      |
| 442582 | 1.5   | 1.0  | 1.0  | -1.6 | STAG3L2    |
| 8027   | 1.0   | 1.0  | 3.5  | 1.0  | STAM       |
| 10617  | 31.5  | 1.0  | 1.0  | 1.0  | STAMBP     |
| 57559  | 2.3   | 1.0  | 1.0  | 1.0  | STAMBPL1   |
| 26228  | 1.0   | 1.0  | 1.0  | 1.0  | STAP1      |
| 6770   | 1.0   | 1.0  | 1.0  | 1.0  | STAR       |
| 90627  | 1.0   | 1.0  | 1.0  | 1.0  | STARD13    |
| 56910  | 1.0   | 3.7  | 4.0  | 3.9  | STARD7     |
| 57519  | 1.0   | 1.0  | -6.2 | -2.7 | STARD9     |
| 6772   | 1.0   | -2.1 | 1.0  | 1.0  | STAT1      |
| 8987   | 5.1   | 1.0  | 8.2  | 1.0  | STBD1      |
| 6781   | 4.9   | 1.0  | 8.2  | 1.0  | STC1       |
| 8614   | 1.0   | 1.0  | -7.8 | -7.5 | STC2       |
| 26872  | 1.0   | 1.0  | -6.3 | 1.0  | STEAP1     |
| 55240  | 1.0   | 1.0  | 6.9  | 4.1  | STEAP3     |
| 474171 | 1.0   | 4.1  | 1.0  | 1.0  | STGC3      |
| 246744 | 1.0   | 1.0  | 1.0  | 1.0  | STH        |
| 6793   | 1.0   | 1.0  | 1.0  | 1.0  | STK10      |
| 6794   | -2.5  | 2.5  | 4.8  | 3.9  | STK11      |



|        |       |      |      |      |         |
|--------|-------|------|------|------|---------|
| 114790 | 1.0   | 1.0  | 1.0  | 1.0  | STK111P |
| 9262   | 1.0   | 1.0  | 1.0  | 1.0  | STK17B  |
| 8428   | 1.0   | 1.0  | -1.6 | 1.0  | STK24   |
| 56164  | 1.0   | 1.0  | 1.0  | 1.0  | STK31   |
| 282974 | 1.0   | 1.8  | 1.0  | 1.0  | STK32C  |
| 65975  | 1.0   | 5.2  | 1.0  | 1.0  | STK33   |
| 27148  | 2.1   | 1.0  | -4.6 | 1.0  | STK36   |
| 27347  | 1.0   | 1.0  | -3.4 | -3.6 | STK39   |
| 6789   | 1.0   | 1.0  | 1.0  | 2.3  | STK4    |
| 50861  | 1.0   | 3.1  | 3.6  | 1.0  | STMN3   |
| 30968  | -5.3  | 1.0  | 1.0  | 1.0  | STOML2  |
| 161003 | 1.0   | 1.0  | 1.0  | 1.0  | STOML3  |
| 85439  | 1.0   | 1.0  | 1.0  | 1.0  | STON2   |
| 64220  | 1.0   | -5.5 | -4.7 | 1.0  | STRA6   |
| 55437  | -9.9  | 5.2  | 1.0  | 3.3  | STRADB  |
| 55342  | 1.0   | 1.0  | 2.4  | 2.4  | STRBP   |
| 3703   | 1.0   | -2.7 | 1.0  | -2.5 | STT3A   |
| 201595 | -2.3  | 1.0  | 1.0  | -5.9 | STT3B   |
| 55014  | 1.0   | 1.0  | -2.4 | -2.4 | STX17   |
| 112755 | 1.0   | 1.0  | 1.0  | 1.0  | STX1B   |
| 10228  | 1.0   | 1.0  | 1.0  | 1.0  | STX6    |
| 8417   | 1.0   | 1.0  | 1.8  | 1.0  | STX7    |
| 9482   | -2.2  | 1.0  | 1.0  | -4.1 | STX8    |
| 252983 | 1.0   | 1.0  | -1.5 | 1.0  | STXBP4  |
| 9515   | 1.0   | 1.0  | 2.8  | 1.0  | STXBP5L |
| 29091  | 1.0   | 1.0  | 1.0  | 1.0  | STXBP6  |
| 55359  | 1.0   | 1.0  | 1.0  | 1.0  | STYK1   |
| 51657  | 1.0   | 1.0  | 1.0  | 1.0  | STYXL1  |
| 10923  | 1.0   | 1.0  | 1.0  | 1.0  | SUB1    |
| 8803   | -1.8  | 4.0  | 5.6  | 4.8  | SUCLA2  |
| 51684  | 2.6   | 1.0  | 1.0  | 2.4  | SUFU    |
| 57794  | 1.0   | 1.0  | 2.8  | 2.5  | SUGP1   |
| 6799   | 1.0   | 1.0  | 1.0  | -2.7 | SULT1A2 |
| 445329 | 1.0   | 1.0  | -3.8 | 1.0  | SULT1A4 |
| 6819   | 1.7   | 1.0  | 1.0  | -3.4 | SULT1C2 |
| 27233  | 1.0   | 1.0  | 6.2  | 1.0  | SULT1C4 |
| 6820   | 1.0   | 1.0  | 1.0  | 1.0  | SULT2B1 |
| 25830  | 1.0   | 1.0  | 1.0  | 1.0  | SULT4A1 |
| 285362 | 1.0   | 1.0  | 3.7  | 1.0  | SUMF1   |
| 7341   | 1.0   | 1.0  | -2.8 | -2.2 | SUMO1   |
| 474338 | 1.0   | -2.9 | 1.0  | -2.6 | SUMO1P3 |
| 6612   | 1.0   | -2.4 | 1.0  | 1.0  | SUMO3   |
| 23353  | 1.0   | 1.0  | 6.2  | 1.0  | SUN1    |
| 256979 | 1.0   | -1.8 | 1.0  | 1.0  | SUN3    |
| 140732 | -3.7  | -2.8 | -2.7 | 1.0  | SUN5    |
| 8464   | -30.0 | 1.5  | 1.0  | 1.0  | SUPT3H  |
| 6832   | 1.0   | -2.4 | -7.1 | -2.9 | SUPV3L1 |
| 203328 | 1.0   | 1.0  | 1.0  | 1.0  | SUSD3   |

|        |       |      |      |      |         |
|--------|-------|------|------|------|---------|
| 6839   | 1.9   | 1.0  | -3.8 | 1.0  | SUV39H1 |
| 79723  | 1.0   | 1.0  | 1.6  | 1.0  | SUV39H2 |
| 6840   | 1.0   | 1.0  | 4.3  | 1.0  | SVIL    |
| 258010 | 1.9   | 1.0  | -2.6 | 1.0  | SVIP    |
| 55530  | 1.0   | 1.0  | 2.6  | 1.0  | SVOP    |
| 55638  | 1.0   | 1.0  | 1.0  | 1.0  | SYBU    |
| 644186 | 1.0   | 1.0  | 1.0  | 1.0  | SYCE3   |
| 342898 | 1.0   | 1.0  | 1.0  | 1.0  | SYCN    |
| 84144  | 1.0   | 1.0  | 1.0  | 5.6  | SYDE2   |
| 6853   | 1.0   | 1.0  | 1.0  | 1.0  | SYN1    |
| 81493  | 1.0   | 1.0  | -3.1 | 1.0  | SYNC    |
| 23345  | 1.0   | 3.0  | 1.0  | 1.0  | SYNE1   |
| 8831   | 1.0   | 1.0  | 1.0  | 1.0  | SYNGAP1 |
| 9145   | 1.0   | -4.1 | 1.0  | 1.0  | SYNGR1  |
| 9144   | -5.6  | 1.0  | 1.0  | 1.0  | SYNGR2  |
| 8871   | 1.0   | 1.0  | -2.6 | 1.0  | SYNJ2   |
| 11346  | 2.5   | 1.0  | 2.5  | 1.0  | SYNPO   |
| 171024 | 1.0   | -5.8 | -8.1 | 1.0  | SYNPO2  |
| 79933  | 1.0   | 1.0  | 1.0  | -1.5 | SYNPO2L |
| 132204 | 1.0   | 1.0  | 1.0  | 1.0  | SYNPR   |
| 6856   | 1.0   | 1.0  | 4.0  | 4.2  | SYPL1   |
| 6857   | 1.0   | 3.0  | 1.0  | 1.0  | SYT1    |
| 51760  | 1.0   | 1.0  | 1.0  | 1.0  | SYT17   |
| 148281 | 1.0   | 1.0  | -4.0 | 1.0  | SYT6    |
| 90019  | 1.0   | -7.4 | 1.0  | 1.0  | SYT8    |
| 84958  | 1.0   | 4.3  | 3.7  | 1.0  | SYTL1   |
| 94121  | 1.0   | 1.0  | 1.0  | 1.0  | SYTL4   |
| 84447  | 1.0   | 1.0  | 10.4 | 1.0  | SYVN1   |
| 23334  | -2.3  | 1.0  | 1.0  | 1.0  | SZT2    |
| 9287   | 1.0   | 1.0  | 1.0  | 1.0  | TAAR2   |
| 10454  | 1.0   | 1.0  | 1.0  | 1.0  | TAB1    |
| 6863   | 1.0   | -6.3 | 1.0  | -7.9 | TAC1    |
| 117143 | 1.0   | 1.0  | 1.0  | 1.0  | TADA1   |
| 6871   | 1.0   | -2.6 | 1.0  | 1.0  | TADA2A  |
| 9015   | 1.0   | 1.0  | 1.0  | 1.0  | TAF1A   |
| 79101  | -13.8 | 1.0  | 1.0  | 1.0  | TAF1D   |
| 138474 | 1.0   | 1.0  | 5.3  | 4.3  | TAF1L   |
| 83860  | -5.5  | 1.0  | 1.0  | 1.0  | TAF3    |
| 6874   | 1.0   | -5.4 | -5.4 | 1.0  | TAF4    |
| 6875   | 1.0   | 1.0  | -4.8 | 1.0  | TAF4B   |
| 27097  | -3.8  | 1.0  | 1.0  | 1.0  | TAF5L   |
| 6878   | 1.0   | 1.0  | 1.0  | 1.0  | TAF6    |
| 6880   | 1.0   | 1.0  | 1.0  | 1.0  | TAF9    |
| 117289 | 1.0   | -4.8 | 1.0  | 1.0  | TAGAP   |
| 6876   | 1.0   | 1.0  | 1.0  | 1.0  | TAGLN   |
| 6886   | 1.0   | -4.4 | -2.7 | -5.4 | TAL1    |
| 6887   | 1.0   | 1.0  | 1.0  | 1.0  | TAL2    |
| 26115  | 1.0   | 4.1  | 3.0  | 1.0  | TANC2   |

|        |       |      |      |      |          |
|--------|-------|------|------|------|----------|
| 10010  | 1.0   | 1.0  | 1.0  | 1.0  | TANK     |
| 57551  | 1.0   | 1.0  | 1.0  | 1.0  | TAOK1    |
| 9344   | 3.3   | 2.4  | 1.0  | -2.8 | TAOK2    |
| 6890   | 1.0   | 4.6  | 1.0  | 1.0  | TAP1     |
| 6891   | 3.8   | 1.0  | 4.6  | 3.1  | TAP2     |
| 6892   | -16.4 | 1.0  | 1.0  | 1.0  | TAPBP    |
| 55080  | 1.0   | 1.0  | 1.0  | 1.0  | TAPBPL   |
| 202018 | -12.1 | -5.6 | -5.0 | -3.7 | TAPT1    |
| 445347 | 1.0   | -5.7 | -5.8 | 1.0  | TARP     |
| 80222  | 1.0   | 1.0  | 1.0  | 1.0  | TARS2    |
| 80835  | -2.6  | 1.0  | 1.0  | -7.6 | TAS1R1   |
| 50839  | 1.0   | 1.0  | -2.7 | -3.0 | TAS2R10  |
| 50838  | 1.0   | 1.0  | 1.0  | 1.0  | TAS2R13  |
| 259290 | 1.0   | 1.0  | 1.0  | 2.8  | TAS2R31  |
| 259285 | 1.0   | 1.0  | 1.0  | 1.0  | TAS2R39  |
| 50832  | 1.0   | 1.0  | 1.0  | 1.0  | TAS2R4   |
| 259286 | 1.0   | 1.0  | 2.7  | 1.0  | TAS2R40  |
| 54429  | 1.0   | 1.0  | 1.0  | 1.0  | TAS2R5   |
| 338398 | -2.3  | 1.0  | 1.0  | -5.2 | TAS2R60  |
| 6898   | 1.0   | 1.0  | 1.0  | 1.0  | TAT      |
| 83940  | 1.0   | 1.0  | -3.5 | 1.0  | TATDN1   |
| 6901   | 1.0   | 1.0  | 2.7  | 1.0  | TAZ      |
| 54662  | 1.0   | 1.0  | 1.0  | 1.0  | TBC1D13  |
| 64786  | 1.0   | 1.0  | 1.0  | 1.0  | TBC1D15  |
| 125058 | 1.0   | 1.0  | 2.4  | 1.0  | TBC1D16  |
| 25771  | 1.0   | 1.0  | 1.0  | 1.0  | TBC1D22A |
| 4943   | 1.0   | -4.4 | 1.0  | 1.0  | TBC1D25  |
| 353149 | 1.0   | 1.0  | 1.0  | 1.0  | TBC1D26  |
| 26083  | 1.0   | 1.0  | 1.0  | 1.0  | TBC1D29  |
| 23329  | 1.0   | 1.0  | 1.0  | 1.0  | TBC1D30  |
| 9779   | 1.0   | 1.0  | 5.1  | 1.0  | TBC1D5   |
| 1155   | 1.0   | 1.0  | 1.0  | -3.7 | TBCB     |
| 29110  | 1.0   | 1.0  | 1.0  | 1.0  | TBK1     |
| 90665  | 1.0   | 1.0  | 1.7  | 1.0  | TBL1Y    |
| 6908   | 1.0   | 1.0  | 2.3  | 2.4  | TBP      |
| 10716  | 1.0   | 4.8  | 1.0  | 1.0  | TBR1     |
| 6899   | 1.8   | 1.0  | 1.0  | 1.0  | TBX1     |
| 6913   | 1.0   | 1.0  | -2.8 | 1.0  | TBX15    |
| 6926   | 1.0   | 1.0  | -9.5 | -8.6 | TBX3     |
| 6911   | 1.0   | 1.0  | 1.0  | 1.0  | TBX6     |
| 6915   | 1.0   | 1.0  | -3.2 | -2.5 | TBXA2R   |
| 6916   | 2.2   | 3.7  | 1.0  | 1.0  | TBXAS1   |
| 9338   | 1.0   | 3.0  | 3.1  | 1.0  | TCEAL1   |
| 140597 | 1.0   | 1.0  | 1.0  | 1.0  | TCEAL2   |
| 79921  | 1.0   | 3.1  | 2.3  | 1.0  | TCEAL4   |
| 56849  | 1.0   | -6.1 | -8.3 | -6.3 | TCEAL7   |
| 90843  | 1.0   | 1.0  | 1.0  | 1.0  | TCEAL8   |
| 162699 | 1.0   | 1.0  | 1.0  | 1.0  | TCEB3C   |

|           |      |      |      |      |          |
|-----------|------|------|------|------|----------|
| 6941      | 1.0  | 1.0  | 1.0  | 1.0  | TCF19    |
| 6943      | 1.0  | 1.0  | -3.0 | 1.0  | TCF21    |
| 150921    | 1.0  | 1.0  | 1.0  | 1.0  | TCF23    |
| 22980     | 1.7  | 1.0  | 4.6  | 2.9  | TCF25    |
| 6929      | 2.6  | 1.0  | 1.0  | 1.0  | TCF3     |
| 6925      | -8.8 | 1.0  | 1.0  | 1.0  | TCF4     |
| 6932      | 1.0  | 1.0  | 1.0  | 1.0  | TCF7     |
| 83439     | 1.0  | 1.0  | 1.0  | 1.0  | TCF7L1   |
| 6934      | 1.0  | 1.0  | 1.0  | -1.6 | TCF7L2   |
| 10732     | 1.0  | 2.0  | 1.0  | 1.0  | TCFL5    |
| 8115      | 1.0  | 2.8  | 1.0  | 1.0  | TCL1A    |
| 9623      | 1.7  | 1.0  | 5.6  | 1.0  | TCL1B    |
| 6949      | 2.1  | 1.0  | -2.4 | 1.0  | TCOF1    |
| 6950      | -1.8 | -6.1 | -4.1 | 1.0  | TCP1     |
| 6953      | 1.0  | 1.0  | 1.0  | 1.0  | TCP10    |
| 140290    | 1.0  | -2.7 | -2.6 | 1.0  | TCP10L   |
| 401285    | 1.6  | 1.0  | 6.0  | 1.0  | TCP10L2  |
| 6954      | 1.0  | 1.0  | 1.0  | 1.0  | TCP11    |
| 55346     | 1.0  | 1.0  | -2.3 | 1.0  | TCP11L1  |
| 202500    | 1.0  | 1.0  | -3.3 | 1.0  | TCTE1    |
| 6991      | 5.5  | 1.0  | 1.0  | 1.0  | TCTE3    |
| 255758    | 1.0  | 1.0  | -6.0 | 1.0  | TCTEX1D2 |
| 79867     | 1.0  | 4.7  | 4.1  | 5.8  | TCTN2    |
| 26123     | 1.0  | -7.1 | 1.0  | -7.5 | TCTN3    |
| 6996      | 1.0  | 1.0  | 1.0  | 1.0  | TDG      |
| 55775     | 1.0  | 1.0  | 1.0  | 1.0  | TDP1     |
| 56165     | -7.9 | 1.0  | 4.7  | 1.0  | TDRD1    |
| 163589    | 1.0  | -2.6 | 1.0  | -2.2 | TDRD5    |
| 221400    | 1.0  | 1.0  | 1.0  | 1.0  | TDRD6    |
| 23424     | -2.7 | 1.0  | -5.0 | -5.0 | TDRD7    |
| 732253    | 1.0  | 5.4  | 5.1  | 3.8  | TDRG1    |
| 11022     | 1.0  | 1.0  | 1.0  | 1.0  | TDRKH    |
| 7004      | 1.0  | -3.1 | 1.0  | 1.0  | TEAD4    |
| 25851     | 1.0  | 1.0  | 1.8  | 1.0  | TECPR1   |
| 9895      | 1.0  | 1.0  | 1.0  | 1.0  | TECPR2   |
| 7007      | 1.0  | 1.0  | 1.0  | 1.0  | TECTA    |
| 6975      | -1.8 | 1.0  | 1.0  | -4.4 | TECTB    |
| 83659     | 1.0  | 1.0  | -3.5 | 1.0  | TEKT1    |
| 100132288 | -3.7 | 1.0  | 1.0  | 1.0  | TEKT4P2  |
| 9894      | 1.7  | -3.9 | 1.0  | 1.0  | TELO2    |
| 7013      | 4.2  | -6.0 | 4.6  | 4.5  | TERF1    |
| 54386     | 1.0  | 1.0  | 1.8  | 1.0  | TERF2IP  |
| 26136     | 1.0  | 2.4  | 2.9  | 1.0  | TES      |
| 54997     | 1.0  | 1.0  | 1.0  | 1.0  | TESC     |
| 10420     | 1.0  | 1.0  | 3.3  | 3.2  | TESK2    |
| 80312     | -6.0 | 1.0  | 1.0  | 1.0  | TET1     |
| 54881     | -1.5 | 1.0  | 1.0  | 1.0  | TEX10    |
| 56157     | 1.0  | -3.4 | -3.9 | 1.0  | TEX13A   |

|        |      |      |       |      |           |
|--------|------|------|-------|------|-----------|
| 56156  | 1.0  | 1.0  | 1.0   | 1.0  | TEX13B    |
| 56154  | 1.0  | -4.1 | -5.6  | -3.6 | TEX15     |
| 1527   | 2.3  | 1.0  | 1.0   | 1.0  | TEX28     |
| 7018   | 1.0  | 1.0  | 1.0   | 1.0  | TF        |
| 7019   | 1.0  | 1.0  | -5.4  | 1.0  | TFAM      |
| 7020   | 1.0  | 1.0  | 1.0   | 1.0  | TFAP2A    |
| 7022   | 1.0  | 1.0  | 4.1   | 4.7  | TFAP2C    |
| 83741  | 1.0  | -7.2 | -9.0  | 1.0  | TFAP2D    |
| 51106  | 1.0  | 1.0  | 4.4   | 1.0  | TFB1M     |
| 7027   | 1.9  | 1.0  | 1.0   | 1.0  | TFDP1     |
| 51270  | 1.0  | 1.0  | 1.0   | 1.0  | TFDP3     |
| 7030   | 1.0  | 1.0  | 3.2   | 1.0  | TFE3      |
| 7942   | 1.0  | 1.0  | -2.4  | 1.0  | TFEB      |
| 7033   | -1.7 | 1.0  | 1.0   | 1.0  | TFF3      |
| 10342  | 1.0  | 1.0  | 1.0   | 1.0  | TFG       |
| 7035   | 1.0  | 1.0  | 2.4   | 1.0  | TFPI      |
| 7037   | 1.0  | 2.7  | 3.3   | 1.0  | TFRC      |
| 7040   | 1.0  | -1.7 | -1.5  | 1.0  | TGFB1     |
| 7042   | 1.0  | 1.0  | -5.8  | 1.0  | TGFB2     |
| 7043   | 1.0  | 1.0  | -4.6  | 1.0  | TGFB3     |
| 7045   | 1.0  | 1.0  | 2.5   | 1.0  | TGFBI     |
| 7048   | 1.0  | 1.0  | 1.0   | 1.0  | TGFBR2    |
| 9392   | 1.0  | 1.5  | 1.0   | 1.0  | TGFBRAP1  |
| 60436  | 1.0  | 1.0  | 1.0   | 1.0  | TGIF2     |
| 9333   | 1.0  | 1.0  | -4.2  | 1.0  | TGM5      |
| 116179 | 1.0  | 1.0  | 3.4   | 1.0  | TGM7      |
| 10618  | 1.0  | 1.0  | 1.0   | 2.5  | TGOLN2    |
| 51497  | 1.0  | 1.0  | 3.5   | 1.0  | TH1L      |
| 63892  | 1.0  | 1.0  | 1.0   | 1.0  | THADA     |
| 439931 | 1.0  | 1.0  | -5.6  | 1.0  | THAP7-AS1 |
| 199745 | 1.0  | 1.0  | 1.0   | 1.0  | THAP8     |
| 7056   | 1.0  | 1.0  | 6.8   | 1.0  | THBD      |
| 7058   | 1.0  | 1.0  | 1.0   | 1.0  | THBS2     |
| 51298  | 1.0  | 1.0  | 1.0   | 1.0  | THEG      |
| 117145 | 1.6  | 1.0  | 1.0   | 1.0  | THEM4     |
| 284486 | 4.4  | 1.0  | -6.5  | 1.0  | THEM5     |
| 54974  | 1.9  | -2.3 | 1.0   | 1.0  | THG1L     |
| 57187  | 1.0  | -2.9 | 2.7   | -3.3 | THOC2     |
| 84321  | 1.0  | -4.3 | -4.3  | -4.1 | THOC3     |
| 8563   | -7.2 | 1.0  | 1.0   | -3.8 | THOC5     |
| 79228  | 1.0  | 1.0  | 1.0   | -2.4 | THOC6     |
| 7066   | 1.0  | 1.0  | -2.3  | 1.0  | THPO      |
| 7067   | 3.2  | 1.0  | 1.0   | 1.0  | THRA      |
| 9967   | 1.0  | 1.0  | 1.0   | 1.0  | THRAP3    |
| 79875  | 1.0  | 1.0  | -16.8 | 1.0  | THSD4     |
| 80731  | 1.5  | 1.0  | 1.0   | 1.0  | THSD7B    |
| 80745  | 1.0  | 1.0  | 2.5   | 1.0  | THUMPD2   |
| 7072   | 2.0  | 1.0  | 1.0   | 1.0  | TIA1      |

|           |      |      |      |      |          |
|-----------|------|------|------|------|----------|
| 7073      | 1.0  | 1.0  | 1.0  | 1.0  | TIAL1    |
| 200765    | 2.0  | 1.0  | -2.9 | 1.0  | TIGD1    |
| 220359    | 1.0  | 1.0  | 1.0  | 1.0  | TIGD3    |
| 201633    | 1.0  | 1.0  | 1.7  | 1.0  | TIGIT    |
| 26519     | 1.0  | 1.0  | 1.0  | 1.0  | TIMM10   |
| 26517     | 1.0  | 1.0  | 1.0  | 1.0  | TIMM13   |
| 10440     | -3.0 | 1.0  | 1.0  | -7.5 | TIMM17A  |
| 29928     | 1.0  | 1.9  | 5.5  | 2.1  | TIMM22   |
| 100287932 | 1.9  | 1.0  | 1.0  | 1.0  | TIMM23   |
| 10469     | 1.0  | 1.0  | 1.0  | 1.0  | TIMM44   |
| 26521     | 1.0  | 1.0  | 1.0  | 1.0  | TIMM8B   |
| 26520     | 1.0  | 1.0  | 1.0  | 1.0  | TIMM9    |
| 7079      | 1.0  | 1.0  | 2.9  | 1.0  | TIMP4    |
| 64129     | 1.0  | 1.0  | 1.0  | 1.0  | TINAGL1  |
| 26277     | 1.0  | 1.0  | 3.1  | 3.4  | TINF2    |
| 25976     | 1.0  | -2.3 | 1.0  | -5.1 | TIPARP   |
| 54962     | 1.0  | -3.2 | -3.3 | -3.2 | TIPIN    |
| 261726    | 1.0  | 1.0  | 1.0  | 1.0  | TIPRL    |
| 114609    | 1.0  | 1.0  | 1.0  | 1.0  | TIRAP    |
| 93643     | 1.0  | 1.0  | 1.0  | 1.0  | TJAP1    |
| 9414      | 1.0  | 1.0  | 4.0  | 3.4  | TJP2     |
| 8277      | 1.0  | 1.0  | 2.5  | 1.0  | TKTL1    |
| 7088      | 1.0  | 3.8  | 5.8  | 1.0  | TLE1     |
| 7091      | 1.0  | 1.0  | 1.0  | 1.0  | TLE4     |
| 79816     | 1.0  | -2.6 | 1.0  | 1.0  | TLE6     |
| 9874      | -1.6 | 1.0  | 1.0  | 1.0  | TLK1     |
| 11011     | 1.8  | 1.0  | -4.7 | 1.0  | TLK2     |
| 7092      | -4.5 | 1.0  | 1.0  | 1.0  | TLL1     |
| 7098      | 1.0  | 1.0  | 1.0  | 1.0  | TLR3     |
| 7099      | 1.0  | 1.0  | 1.0  | 1.0  | TLR4     |
| 349408    | 1.0  | 1.0  | 2.6  | 1.0  | TLR8-AS1 |
| 83941     | 1.0  | 1.0  | -2.4 | 1.0  | TM2D1    |
| 4071      | 1.0  | 1.0  | -6.9 | 1.0  | TM4SF1   |
| 7104      | 1.0  | 1.0  | 1.0  | 1.0  | TM4SF4   |
| 9032      | 1.0  | 5.2  | 3.6  | 1.0  | TM4SF5   |
| 53346     | 1.8  | -2.5 | -2.8 | 1.0  | TM6SF1   |
| 53345     | 1.0  | -3.5 | 1.0  | 1.0  | TM6SF2   |
| 9375      | 1.0  | 1.0  | 1.0  | 1.0  | TM9SF2   |
| 51643     | 1.0  | 1.0  | 1.0  | 1.0  | TMBIM4   |
| 117531    | 1.0  | 1.0  | 1.0  | 1.0  | TMC1     |
| 342125    | 1.0  | 1.0  | 5.9  | 1.0  | TMC3     |
| 147138    | 1.0  | 1.0  | 5.1  | 1.0  | TMC8     |
| 23023     | -2.8 | 5.2  | 4.8  | 3.5  | TMCC1    |
| 9911      | 1.0  | 1.0  | -3.5 | -5.6 | TMCC2    |
| 127391    | 1.0  | 1.0  | 1.0  | 1.0  | TMCO2    |
| 55002     | 1.0  | 1.0  | 1.0  | 1.0  | TMCO3    |
| 255104    | 1.0  | 1.0  | 2.1  | 1.0  | TMCO4    |
| 145942    | 1.5  | 1.0  | 1.0  | 5.3  | TMCO5A   |

|           |      |      |      |      |          |
|-----------|------|------|------|------|----------|
| 79613     | 1.0  | 1.0  | 1.0  | 1.0  | TMCO7    |
| 11018     | 1.0  | -2.8 | 1.0  | -2.5 | TMED1    |
| 10972     | 1.0  | 1.0  | 4.5  | 1.0  | TMED10   |
| 146456    | 1.0  | 1.0  | 1.0  | 1.0  | TMED6    |
| 283578    | 1.0  | 1.0  | 4.5  | 1.0  | TMED8    |
| 284114    | 1.0  | 1.0  | 1.0  | -3.3 | TMEM102  |
| 54868     | 1.0  | 1.0  | 1.0  | 1.0  | TMEM104  |
| 113277    | 1.0  | 1.0  | 1.0  | 4.4  | TMEM106A |
| 79022     | 1.0  | 1.0  | 4.6  | 3.3  | TMEM106C |
| 66000     | 1.0  | 1.0  | 1.0  | 1.0  | TMEM108  |
| 8834      | 1.0  | -2.6 | 1.0  | 1.0  | TMEM11   |
| 55831     | 1.0  | 1.0  | 1.0  | 1.0  | TMEM111  |
| 283953    | 1.0  | 1.0  | -4.7 | 1.0  | TMEM114  |
| 89894     | 1.0  | 1.0  | 1.0  | 1.0  | TMEM116  |
| 338773    | 1.0  | 1.0  | -2.9 | 1.0  | TMEM119  |
| 144404    | 1.0  | 1.0  | -5.5 | -4.4 | TMEM120B |
| 114908    | 1.0  | 2.4  | 1.7  | 1.0  | TMEM123  |
| 128218    | 1.0  | 1.0  | 1.0  | 1.0  | TMEM125  |
| 55863     | 1.0  | 1.0  | 1.0  | 1.0  | TMEM126B |
| 51524     | 1.0  | 1.0  | 1.0  | 1.0  | TMEM138  |
| 135932    | 1.0  | 1.0  | 1.0  | 1.0  | TMEM139  |
| 55281     | 1.0  | 1.0  | 1.0  | 3.2  | TMEM140  |
| 257062    | 1.0  | 5.6  | 3.5  | 4.7  | TMEM146  |
| 81853     | 1.0  | 1.0  | 1.0  | 2.4  | TMEM14B  |
| 51522     | 1.0  | 1.0  | 1.0  | 1.0  | TMEM14C  |
| 129303    | -1.6 | 1.7  | 1.5  | 2.1  | TMEM150A |
| 201799    | 1.7  | -1.9 | -4.3 | 1.0  | TMEM154  |
| 153396    | 3.1  | 1.0  | 6.4  | 1.0  | TMEM161B |
| 84187     | 1.0  | 1.0  | 2.2  | 1.0  | TMEM164  |
| 55858     | 1.0  | 1.0  | 1.0  | 1.0  | TMEM165  |
| 56900     | 1.0  | 1.0  | 1.0  | 1.0  | TMEM167B |
| 124491    | 1.0  | 2.0  | 1.0  | 1.0  | TMEM170A |
| 100113407 | 1.0  | 1.0  | 1.0  | 15.2 | TMEM170B |
| 84286     | 1.0  | 1.0  | 2.7  | 1.0  | TMEM175  |
| 28959     | 1.0  | 1.0  | 1.0  | 1.0  | TMEM176B |
| 80775     | 1.0  | 1.0  | 1.9  | 1.0  | TMEM177  |
| 130733    | 1.0  | 1.0  | -4.9 | -6.3 | TMEM178  |
| 388021    | 1.0  | 1.0  | 1.0  | 1.0  | TMEM179  |
| 653659    | 1.0  | 1.0  | 2.3  | 1.0  | TMEM183B |
| 202915    | 1.0  | 1.0  | 1.0  | 1.0  | TMEM184A |
| 147744    | 1.0  | 1.9  | 1.0  | 1.0  | TMEM190  |
| 84222     | 1.0  | 1.0  | 1.0  | 1.0  | TMEM191A |
| 147007    | 1.0  | 1.0  | 1.0  | 1.0  | TMEM199  |
| 23670     | 1.0  | 1.0  | 1.0  | 1.0  | TMEM2    |
| 645369    | 1.0  | 1.0  | 1.0  | 3.5  | TMEM200C |
| 199953    | -1.6 | 1.0  | 1.0  | 1.0  | TMEM201  |
| 374882    | 1.0  | 1.0  | 1.0  | -4.4 | TMEM205  |
| 84928     | 1.0  | 3.1  | 2.9  | 2.9  | TMEM209  |

|           |      |      |       |      |           |
|-----------|------|------|-------|------|-----------|
| 221468    | 1.0  | 1.0  | 3.0   | 3.2  | TMEM217   |
| 84065     | 1.0  | -2.4 | 1.0   | 1.0  | TMEM222   |
| 338661    | 1.0  | 1.0  | 1.0   | -6.4 | TMEM225   |
| 161145    | 1.0  | 1.0  | 1.0   | 1.0  | TMEM229B  |
| 79583     | 4.1  | 1.0  | 1.0   | 5.1  | TMEM231   |
| 65062     | -2.7 | 1.0  | -12.5 | 1.0  | TMEM237   |
| 100288797 | 1.0  | 1.0  | 1.0   | 1.0  | TMEM239   |
| 84866     | 1.0  | 1.0  | -3.5  | 1.0  | TMEM25    |
| 203562    | 1.0  | 1.0  | 3.8   | 2.9  | TMEM31    |
| 140738    | 1.0  | 2.7  | 1.0   | 2.4  | TMEM37    |
| 79041     | 1.0  | 1.0  | 1.0   | -2.1 | TMEM38A   |
| 90407     | -2.1 | -7.0 | -3.7  | -6.8 | TMEM41A   |
| 131616    | 1.0  | 3.8  | 1.0   | 1.0  | TMEM42    |
| 79188     | 1.0  | 3.0  | 2.6   | 2.8  | TMEM43    |
| 93109     | -2.8 | 1.0  | 1.0   | 1.0  | TMEM44    |
| 55706     | 1.6  | -4.6 | 1.0   | 1.0  | TMEM48    |
| 10329     | 1.0  | 1.0  | 1.0   | 1.0  | TMEM5     |
| 757       | 1.0  | 1.0  | 1.0   | 1.0  | TMEM50B   |
| 339456    | 1.0  | 1.0  | 2.4   | 2.0  | TMEM52    |
| 79639     | 1.0  | 1.0  | 1.0   | 1.0  | TMEM53    |
| 113452    | 1.0  | 1.0  | -2.6  | 1.0  | TMEM54    |
| 55529     | 1.0  | 1.0  | 1.0   | 1.0  | TMEM55A   |
| 90809     | 1.0  | 1.0  | 6.0   | 1.0  | TMEM55B   |
| 55219     | 1.0  | 1.0  | -3.3  | -1.9 | TMEM57    |
| 9528      | 1.0  | 1.0  | -2.5  | -2.2 | TMEM59    |
| 169200    | 1.0  | 1.0  | 1.0   | 1.0  | TMEM64    |
| 137695    | 1.0  | 2.0  | 4.1   | 1.0  | TMEM68    |
| 51249     | 1.0  | 1.0  | 1.0   | 1.0  | TMEM69    |
| 137835    | 1.0  | 2.6  | -4.3  | 1.0  | TMEM71    |
| 643236    | 1.0  | 3.5  | 1.0   | 2.6  | TMEM72    |
| 157753    | 1.0  | 26.6 | 1.0   | 1.0  | TMEM74    |
| 283232    | 1.0  | 1.0  | 2.5   | 4.2  | TMEM80    |
| 51234     | -5.3 | 1.0  | 1.0   | -4.1 | TMEM85    |
| 144110    | -3.6 | 1.0  | -1.5  | 1.0  | TMEM86A   |
| 84910     | 1.0  | 1.0  | 1.0   | 1.0  | TMEM87B   |
| 440955    | 1.0  | -3.4 | -3.4  | 1.0  | TMEM89    |
| 51754     | 1.0  | 1.0  | -2.6  | -2.5 | TMEM8B    |
| 26022     | 1.0  | 1.0  | 1.0   | 1.0  | TMEM98    |
| 29765     | 1.0  | -3.6 | -4.2  | -3.5 | TMOD4     |
| 339967    | 1.0  | 1.0  | 1.0   | 1.0  | TMPRSS11A |
| 132724    | 1.0  | 1.0  | -1.6  | 1.0  | TMPRSS11B |
| 84000     | 1.7  | 1.0  | 6.1   | 1.0  | TMPRSS13  |
| 56649     | 1.6  | 1.0  | 1.0   | 1.0  | TMPRSS4   |
| 80975     | 1.0  | 1.0  | 1.0   | 1.0  | TMPRSS5   |
| 164656    | 1.0  | 1.0  | 3.6   | 1.0  | TMPRSS6   |
| 360200    | 1.0  | 1.0  | 1.0   | 1.0  | TMPRSS9   |
| 286527    | 1.0  | 1.0  | 1.0   | 4.6  | TMSB15B   |
| 83857     | 1.0  | 1.0  | 4.4   | 5.4  | TMTC1     |



|           |       |      |      |      |           |
|-----------|-------|------|------|------|-----------|
| 81542     | 1.0   | 1.0  | 2.7  | 1.0  | TMX1      |
| 51075     | 1.0   | 3.6  | 5.2  | 4.4  | TMX2      |
| 54495     | 1.0   | 1.0  | 1.0  | 1.0  | TMX3      |
| 7126      | 1.0   | 1.0  | 1.0  | -4.4 | TNFAIP1   |
| 25816     | 1.9   | 1.0  | 1.0  | 1.0  | TNFAIP8   |
| 8794      | 1.0   | 1.0  | 5.3  | 1.0  | TNFRSF10C |
| 4982      | 1.0   | -2.8 | -3.8 | -2.3 | TNFRSF11B |
| 51330     | 1.0   | 1.0  | 1.8  | 1.0  | TNFRSF12A |
| 23495     | 1.0   | 1.0  | 1.0  | 1.0  | TNFRSF13B |
| 8764      | 1.0   | 2.8  | 1.0  | 1.0  | TNFRSF14  |
| 7132      | 6.5   | 1.0  | 5.6  | 4.1  | TNFRSF1A  |
| 7293      | 1.0   | -3.5 | 1.0  | 1.0  | TNFRSF4   |
| 8743      | 1.0   | 1.0  | 1.0  | 2.5  | TNFSF10   |
| 8741      | 1.0   | 1.0  | 1.0  | 1.0  | TNFSF13   |
| 10673     | 1.0   | 1.0  | -3.2 | 1.0  | TNFSF13B  |
| 8740      | 1.0   | 1.0  | 1.0  | 1.0  | TNFSF14   |
| 9966      | -3.0  | 1.0  | 1.0  | 1.0  | TNFSF15   |
| 8995      | 2.0   | 1.0  | -2.9 | 1.0  | TNFSF18   |
| 8658      | 1.0   | 1.0  | 1.0  | -4.8 | TNKS      |
| 80351     | 1.0   | 1.0  | 1.0  | 2.8  | TNKS2     |
| 7138      | 1.0   | -3.3 | -3.3 | 1.0  | TNNT1     |
| 7140      | 1.0   | 1.0  | 1.0  | 1.0  | TNNT3     |
| 7141      | 1.0   | 1.0  | 1.0  | 1.0  | TNP1      |
| 7142      | -5.3  | 1.0  | -3.1 | -3.2 | TNP2      |
| 23534     | 1.0   | 1.0  | -4.4 | -3.8 | TNPO3     |
| 7143      | 1.0   | 1.0  | -4.4 | 1.0  | TNR       |
| 84629     | 1.0   | 1.0  | 1.0  | 1.0  | TNRC18    |
| 7145      | -2.8  | 1.0  | 1.0  | 1.0  | TNS1      |
| 84951     | 1.0   | 1.0  | 1.0  | 1.0  | TNS4      |
| 7148      | 1.0   | 1.0  | 1.0  | 1.0  | TNXB      |
| 222699    | 1.0   | 1.0  | 1.0  | 1.0  | TOB2P1    |
| 146691    | 1.0   | 1.0  | 1.0  | 1.0  | TOM1L2    |
| 9804      | -2.7  | -2.4 | -2.5 | -2.5 | TOMM20    |
| 56993     | 1.0   | 1.0  | 1.0  | 1.0  | TOMM22    |
| 10452     | -18.9 | 1.0  | 1.0  | -4.5 | TOMM40    |
| 100188893 | 1.6   | 2.4  | 2.6  | 1.0  | TOMM6     |
| 7150      | 1.0   | 1.0  | 1.0  | -2.9 | TOP1      |
| 26092     | 1.7   | 1.0  | 1.0  | 1.0  | TOR1AIP1  |
| 84969     | 1.0   | 1.6  | 1.0  | 1.0  | TOX2      |
| 9878      | 1.0   | 1.0  | 1.0  | 1.0  | TOX4      |
| 7157      | 1.0   | 1.0  | 1.0  | 3.0  | TP53      |
| 63970     | 1.0   | 1.0  | 1.0  | 1.0  | TP53AIP1  |
| 94241     | 1.0   | 1.0  | 4.7  | 1.0  | TP53INP1  |
| 112858    | 1.0   | 1.0  | 1.0  | 1.0  | TP53RK    |
| 11257     | 1.0   | 1.0  | 1.0  | 1.0  | TP53TG1   |
| 24150     | 2.9   | 2.3  | 1.0  | 1.5  | TP53TG3   |
| 27296     | 1.0   | -2.8 | -2.8 | -3.0 | TP53TG5   |
| 7161      | 1.0   | 1.0  | 1.0  | 1.0  | TP73      |

|        |       |       |      |      |          |
|--------|-------|-------|------|------|----------|
| 7162   | 1.0   | 1.0   | 1.0  | 2.3  | TPBG     |
| 53373  | 1.0   | 1.0   | 1.0  | 1.0  | TPCN1    |
| 7163   | 1.0   | 1.0   | 1.0  | 1.0  | TPD52    |
| 7164   | 1.0   | 1.0   | 1.0  | 1.0  | TPD52L1  |
| 89882  | 1.0   | -5.0  | 1.0  | -5.3 | TPD52L3  |
| 7166   | 2.0   | 1.0   | 1.0  | 1.0  | TPH1     |
| 7169   | 1.0   | -2.3  | 1.0  | 1.0  | TPM2     |
| 7170   | 1.0   | -5.8  | 4.0  | 2.9  | TPM3     |
| 7172   | 1.0   | 1.0   | 1.0  | 1.0  | TPMT     |
| 7173   | 1.0   | 13.4  | 1.0  | 1.0  | TPO      |
| 122664 | 1.0   | 1.0   | 1.0  | 1.6  | TPPP2    |
| 7175   | 1.6   | 1.0   | -2.6 | 1.0  | TPR      |
| 348825 | 1.0   | 3.0   | 1.0  | 1.0  | TPRXL    |
| 7177   | 1.0   | 1.0   | 1.0  | -4.8 | TPSAB1   |
| 23430  | 1.0   | 4.1   | 3.3  | 1.0  | TPSD1    |
| 7178   | -1.8  | 1.0   | -5.4 | -4.2 | TPT1     |
| 93492  | 1.0   | 1.0   | 1.0  | 1.0  | TPTE2    |
| 646405 | 1.0   | 1.0   | -3.7 | 1.0  | TPTE2P1  |
| 220115 | 1.0   | -3.4  | 1.0  | 1.0  | TPTE2P3  |
| 22974  | 1.0   | 1.0   | 1.0  | 1.0  | TPX2     |
| 6434   | -1.9  | 1.0   | -2.6 | 1.0  | TRA2B    |
| 8717   | 1.0   | 1.0   | 1.0  | 1.0  | TRADD    |
| 80342  | -8.9  | -4.2  | -3.1 | -3.2 | TRAF3IP3 |
| 7189   | 1.6   | 1.0   | 2.3  | 1.0  | TRAF6    |
| 133022 | 1.0   | 1.0   | 1.0  | 3.8  | TRAM1L1  |
| 7109   | 1.0   | 1.0   | -3.6 | -3.3 | TRAPPC10 |
| 6399   | 1.0   | 1.0   | -7.6 | 1.0  | TRAPPC2  |
| 27095  | 1.0   | 1.0   | 1.0  | 1.0  | TRAPPC3  |
| 79090  | 1.0   | 1.0   | 3.0  | 1.0  | TRAPPC6A |
| 22878  | 1.0   | 1.0   | -7.1 | 1.0  | TRAPPC8  |
| 11181  | 1.0   | 1.0   | 1.0  | 1.0  | TREH     |
| 11277  | 1.0   | 1.0   | 1.0  | -3.8 | TREX1    |
| 29953  | 1.0   | -3.2  | -4.0 | 1.0  | TRHDE    |
| 57761  | 1.0   | 1.0   | 1.0  | 1.0  | TRIB3    |
| 9865   | 9.3   | 1.0   | 1.0  | 1.0  | TRIL     |
| 81559  | 1.0   | -3.3  | -3.2 | 1.0  | TRIM11   |
| 9830   | 1.0   | 1.0   | 2.7  | 3.7  | TRIM14   |
| 89870  | -13.5 | -12.7 | -8.5 | -4.9 | TRIM15   |
| 23321  | -4.7  | 1.0   | 1.0  | 1.0  | TRIM2    |
| 10346  | 1.0   | -2.7  | 1.0  | 1.0  | TRIM22   |
| 8805   | 1.0   | 1.0   | 5.4  | 1.0  | TRIM24   |
| 7706   | -1.6  | 1.0   | 1.0  | 1.0  | TRIM25   |
| 5987   | 5.1   | 1.0   | 1.0  | 1.0  | TRIM27   |
| 10612  | 1.0   | 1.0   | 1.0  | 1.0  | TRIM3    |
| 53840  | 1.0   | 2.7   | 1.7  | 1.0  | TRIM34   |
| 10475  | 1.0   | -4.1  | -6.3 | -4.2 | TRIM38   |
| 89122  | 1.0   | 2.8   | 1.0  | 1.0  | TRIM4    |
| 135644 | 1.0   | 1.0   | -7.1 | -5.5 | TRIM40   |

|        |       |       |      |      |          |
|--------|-------|-------|------|------|----------|
| 80128  | 1.0   | 1.0   | -2.6 | 1.0  | TRIM46   |
| 57093  | 1.0   | 1.0   | 3.0  | 1.0  | TRIM49   |
| 642569 | 1.0   | 1.0   | 1.0  | 1.0  | TRIM53P  |
| 84675  | 1.0   | 1.0   | 1.0  | 1.0  | TRIM55   |
| 81844  | 1.0   | 1.0   | 1.0  | 1.0  | TRIM56   |
| 55223  | 1.8   | -3.3  | 1.0  | 1.0  | TRIM62   |
| 9866   | 1.0   | 1.0   | 1.0  | 1.0  | TRIM66   |
| 205860 | 1.0   | 2.7   | 1.0  | 1.0  | TRIML2   |
| 7204   | 1.0   | 2.7   | 1.0  | 3.6  | TRIO     |
| 11078  | 6.9   | -10.6 | -8.8 | -7.8 | TRIOBP   |
| 9321   | 1.0   | 1.0   | 1.0  | 1.0  | TRIP11   |
| 9320   | 1.0   | 1.0   | -6.4 | 1.0  | TRIP12   |
| 9319   | 1.7   | 5.1   | -1.6 | 1.0  | TRIP13   |
| 51504  | 1.0   | 1.0   | 5.2  | 1.0  | TRMT112  |
| 55039  | 1.0   | 1.0   | 1.0  | 3.3  | TRMT12   |
| 27037  | 1.0   | 1.0   | 1.0  | 3.6  | TRMT2A   |
| 79979  | -3.2  | 1.0   | 1.6  | 3.2  | TRMT2B   |
| 57570  | 1.0   | -2.6  | -2.4 | 1.7  | TRMT5    |
| 51605  | 1.0   | 1.0   | 1.0  | 1.0  | TRMT6    |
| 115708 | 1.5   | 1.0   | 1.0  | 2.5  | TRMT61A  |
| 54952  | -1.9  | 1.0   | -6.9 | 1.0  | TRNAU1AP |
| 51095  | 1.0   | -7.1  | 1.0  | 1.0  | TRNT1    |
| 7216   | 1.0   | 1.0   | 1.0  | 1.0  | TRO      |
| 8989   | 1.0   | 1.0   | 1.0  | 1.0  | TRPA1    |
| 7221   | 1.0   | 5.3   | 1.0  | 1.0  | TRPC2    |
| 7222   | 1.0   | 1.0   | 1.0  | 1.0  | TRPC3    |
| 7223   | 1.0   | 2.1   | 1.0  | 1.9  | TRPC4    |
| 26133  | -1.8  | 1.0   | 1.0  | 1.0  | TRPC4AP  |
| 57113  | 1.0   | -5.9  | 1.0  | 1.0  | TRPC7    |
| 4308   | -8.4  | 1.0   | -3.3 | 1.0  | TRPM1    |
| 80036  | -1.7  | 1.0   | 1.0  | 1.0  | TRPM3    |
| 29850  | 1.0   | 1.0   | -3.5 | 1.0  | TRPM5    |
| 140803 | -1.8  | 1.0   | -2.0 | 1.0  | TRPM6    |
| 54822  | 1.0   | 3.8   | 1.0  | 1.0  | TRPM7    |
| 7227   | 1.0   | -3.0  | -4.8 | -3.3 | TRPS1    |
| 7442   | 1.0   | 1.0   | 1.0  | 1.0  | TRPV1    |
| 162514 | -21.8 | 1.0   | 1.0  | 1.0  | TRPV3    |
| 55503  | 1.0   | 1.0   | 1.0  | 1.0  | TRPV6    |
| 7249   | 1.8   | 1.0   | 1.0  | 1.0  | TSC2     |
| 8848   | 1.0   | 1.0   | 1.0  | 1.0  | TSC22D1  |
| 9819   | 2.6   | 1.0   | 1.0  | 1.0  | TSC22D2  |
| 80746  | 1.0   | 1.0   | 1.0  | 4.6  | TSEN2    |
| 10102  | 1.0   | 1.0   | -5.5 | 1.0  | TSFM     |
| 7251   | 2.1   | 1.0   | 6.8  | 1.0  | TSG101   |
| 254187 | 1.0   | 1.0   | 1.0  | -3.7 | TSGA10IP |
| 10194  | 2.8   | 1.0   | 2.6  | 1.0  | TSHZ1    |
| 128553 | 1.0   | -3.6  | -5.1 | 1.0  | TSHZ2    |
| 25987  | 1.0   | 3.1   | 2.9  | 1.0  | TSKU     |

|        |       |      |      |       |           |
|--------|-------|------|------|-------|-----------|
| 203062 | -1.6  | 1.0  | 1.0  | 1.0   | TSNARE1   |
| 441631 | 2.1   | 1.0  | 1.0  | 1.0   | TSPAN11   |
| 23555  | 1.0   | 1.0  | 1.0  | 1.7   | TSPAN15   |
| 10077  | 1.0   | 1.0  | 2.5  | 1.0   | TSPAN32   |
| 7102   | 1.0   | 1.0  | -2.0 | 1.0   | TSPAN7    |
| 7103   | 1.0   | 1.0  | 1.0  | 1.0   | TSPAN8    |
| 706    | 1.0   | 1.0  | 1.0  | 1.0   | TSPO      |
| 728137 | 1.0   | 1.0  | 1.0  | 1.0   | TSPY3     |
| 83942  | 1.0   | 1.0  | 1.0  | 1.0   | TSSK1B    |
| 81629  | 1.0   | 1.0  | 1.0  | 1.0   | TSSK3     |
| 83983  | 2.9   | 1.0  | 1.0  | 1.0   | TSSK6     |
| 7263   | 4.6   | 7.2  | 1.0  | 1.0   | TST       |
| 158427 | 1.0   | 1.0  | 1.0  | 1.0   | TSTD2     |
| 84630  | 1.0   | -1.6 | 1.0  | 1.0   | TTBK1     |
| 146057 | 1.0   | 1.0  | 4.1  | 1.0   | TTBK2     |
| 7265   | 1.0   | 1.0  | -5.5 | 1.0   | TTC1      |
| 79573  | 1.0   | 1.0  | 1.0  | -2.2  | TTC13     |
| 158248 | 1.0   | 1.0  | 1.0  | -3.2  | TTC16     |
| 55761  | 1.0   | 1.0  | 1.0  | 1.0   | TTC17     |
| 118491 | 1.0   | 1.0  | 1.0  | 1.0   | TTC18     |
| 79809  | 1.0   | -3.0 | 3.3  | 1.0   | TTC21B    |
| 64927  | 1.0   | 1.0  | 1.0  | 1.0   | TTC23     |
| 79989  | 1.0   | 1.0  | -7.6 | 1.0   | TTC26     |
| 23331  | 1.0   | 2.4  | 1.0  | 1.0   | TTC28     |
| 284900 | 1.0   | 1.0  | 1.0  | 1.0   | TTC28-AS1 |
| 83894  | 1.0   | 1.0  | -4.0 | 1.0   | TTC29     |
| 92104  | -1.8  | 1.0  | 1.0  | 1.0   | TTC30A    |
| 9694   | 1.0   | 1.0  | 1.0  | 1.0   | TTC35     |
| 9652   | 1.0   | -4.2 | -4.8 | 1.0   | TTC37     |
| 55020  | 1.0   | 2.8  | 1.0  | 2.2   | TTC38     |
| 22996  | 1.0   | 25.6 | 1.0  | 2.1   | TTC39A    |
| 125488 | 2.0   | 1.0  | 1.0  | -7.2  | TTC39C    |
| 7268   | 1.0   | 1.0  | 1.0  | 3.8   | TTC4      |
| 91875  | 1.0   | 1.0  | 1.0  | 1.0   | TTC5      |
| 23508  | -4.6  | -6.5 | -5.5 | -11.8 | TTC9      |
| 148014 | -4.4  | 1.0  | 1.0  | 1.0   | TTC9B     |
| 9675   | 1.0   | 1.0  | 1.0  | 1.0   | TTI1      |
| 80185  | 1.0   | -1.8 | 1.0  | -2.9  | TTI2      |
| 25809  | 1.0   | 1.0  | -2.2 | 1.0   | TTLL1     |
| 254173 | 1.0   | -2.8 | 1.0  | 1.0   | TTLL10    |
| 23093  | 1.0   | 3.0  | 1.0  | 1.0   | TTLL5     |
| 79739  | -27.2 | 1.0  | 1.0  | 1.0   | TTLL7     |
| 7273   | 1.0   | -3.5 | 1.0  | 1.0   | TTN       |
| 83869  | 1.0   | 2.2  | 1.0  | 1.0   | TTY14     |
| 252953 | 1.0   | 1.0  | -3.9 | -6.8  | TTY21     |
| 114760 | 2.2   | -4.4 | -2.2 | 1.0   | TTY3      |
| 83863  | 1.0   | 1.0  | 1.0  | 1.0   | TTY5      |
| 84672  | 1.0   | 1.0  | 1.0  | -3.4  | TTY6      |

|        |      |      |      |      |         |
|--------|------|------|------|------|---------|
| 94015  | 1.0  | 1.0  | 1.0  | 1.0  | TTYH2   |
| 7846   | 1.0  | 1.0  | 1.0  | 1.0  | TUBA1A  |
| 7277   | 1.0  | 1.0  | 1.0  | 2.8  | TUBA4A  |
| 203068 | 1.0  | 1.0  | 1.0  | 1.0  | TUBB    |
| 81027  | 1.9  | -1.8 | -5.0 | -3.6 | TUBB1   |
| 10381  | 1.0  | 1.0  | -8.7 | 1.0  | TUBB3   |
| 84617  | 1.0  | 1.0  | 1.0  | 1.0  | TUBB6   |
| 347688 | 1.0  | -3.8 | -4.9 | -5.3 | TUBB8   |
| 27175  | 1.0  | 1.0  | 4.5  | 1.0  | TUBG2   |
| 114791 | 1.0  | 1.0  | 1.0  | 1.0  | TUBGCP5 |
| 85378  | 1.0  | -3.8 | 1.0  | 1.0  | TUBGCP6 |
| 7286   | 1.0  | 2.3  | 4.8  | 1.0  | TUFT1   |
| 7289   | 1.0  | 1.0  | 4.8  | 1.0  | TULP3   |
| 64852  | 1.0  | 1.0  | 1.0  | 1.0  | TUT1    |
| 117581 | 1.0  | 1.0  | 1.0  | 1.0  | TWIST2  |
| 57045  | 1.0  | -5.9 | -5.9 | 1.0  | TWSG1   |
| 7294   | 1.0  | 1.0  | 1.0  | 1.0  | TXK     |
| 55787  | 2.1  | -2.0 | 1.0  | 1.0  | TXLNG   |
| 7295   | 2.6  | 1.0  | 1.0  | 1.0  | TXN     |
| 51061  | 1.5  | 1.0  | 1.0  | 1.0  | TXNDC11 |
| 84817  | 1.0  | 1.0  | 1.6  | 1.0  | TXNDC17 |
| 81567  | 1.0  | 1.0  | 1.0  | 1.0  | TXNDC5  |
| 10190  | 1.0  | 1.0  | 2.6  | 1.0  | TXNDC9  |
| 9352   | 1.0  | 1.0  | 1.0  | 1.0  | TXNL1   |
| 10907  | 1.0  | 1.0  | -5.6 | 1.0  | TXNL4A  |
| 7296   | 1.0  | 1.0  | 1.0  | 1.0  | TXNRD1  |
| 7305   | 1.0  | -2.7 | -2.7 | 1.0  | TYROBP  |
| 10054  | 1.0  | 1.0  | 1.0  | 1.0  | UBA2    |
| 79876  | 1.0  | 1.0  | 1.0  | 1.0  | UBA5    |
| 7311   | 1.0  | 1.0  | 1.0  | 1.0  | UBA52   |
| 55236  | 1.0  | 1.0  | 1.0  | 1.0  | UBA6    |
| 7318   | 1.0  | 1.0  | 1.0  | 1.0  | UBA7    |
| 337867 | 1.0  | -2.9 | 1.0  | 1.0  | UBAC2   |
| 51271  | 1.0  | 3.2  | 2.6  | 2.7  | UBAP1   |
| 390595 | 1.0  | 1.0  | 1.0  | 1.0  | UBAP1L  |
| 9898   | 1.0  | 1.0  | 1.0  | 2.3  | UBAP2L  |
| 7319   | 1.0  | 1.0  | 1.0  | 1.0  | UBE2A   |
| 7321   | 7.1  | 1.0  | 3.2  | 3.5  | UBE2D1  |
| 7323   | 1.0  | 8.6  | -6.8 | 1.0  | UBE2D3  |
| 7328   | -3.1 | 1.0  | 1.0  | 1.0  | UBE2H   |
| 389898 | 1.0  | 1.0  | 1.0  | 1.0  | UBE2NL  |
| 29089  | 1.0  | 1.0  | 1.5  | 1.0  | UBE2T   |
| 7335   | -2.0 | 1.0  | 1.0  | 1.0  | UBE2V1  |
| 65264  | 1.0  | 1.0  | 1.0  | -3.0 | UBE2Z   |
| 89910  | 1.0  | 1.0  | 2.5  | 1.0  | UBE3B   |
| 9690   | 1.0  | 3.5  | 6.8  | 1.0  | UBE3C   |
| 10277  | 1.0  | 1.0  | -7.3 | 1.0  | UBE4B   |
| 56061  | 1.0  | 1.0  | 1.0  | 1.0  | UBFD1   |

|        |      |      |      |      |           |
|--------|------|------|------|------|-----------|
| 5412   | 1.0  | 2.5  | 2.5  | 1.6  | UBL3      |
| 59286  | 1.0  | 1.0  | 1.0  | 1.0  | UBL5      |
| 84993  | 1.0  | 1.0  | 1.0  | -2.0 | UBL7      |
| 7343   | 1.0  | 1.0  | 1.0  | 1.0  | UBTF      |
| 26043  | 1.0  | 3.9  | 1.0  | 1.0  | UBXN7     |
| 7993   | 1.0  | 1.0  | 1.0  | 5.0  | UBXN8     |
| 221044 | 1.0  | 1.0  | 1.0  | 1.0  | UCMA      |
| 90226  | 1.0  | 1.0  | -4.3 | -3.8 | UCN2      |
| 51569  | 1.0  | 1.0  | 1.0  | 1.0  | UFM1      |
| 643763 | 1.0  | 1.0  | 4.6  | 1.0  | UG0898H09 |
| 7358   | 1.0  | -6.5 | 1.0  | 1.0  | UGDH      |
| 54576  | 2.1  | -2.2 | 1.0  | 1.0  | UGT1A8    |
| 79799  | 1.0  | 1.0  | 1.0  | 1.0  | UGT2A3    |
| 7365   | 1.0  | 1.0  | -4.8 | 1.0  | UGT2B10   |
| 10720  | 1.0  | 1.0  | 2.4  | 1.0  | UGT2B11   |
| 7366   | 1.0  | 1.0  | 1.0  | 1.0  | UGT2B15   |
| 7364   | 1.0  | 1.0  | 1.0  | 1.0  | UGT2B7    |
| 133688 | 1.0  | 1.0  | 1.0  | 1.0  | UGT3A1    |
| 7368   | 12.0 | 1.0  | 3.4  | 1.0  | UGT8      |
| 127933 | 1.0  | 1.0  | 3.4  | 1.0  | UHMK1     |
| 8408   | 1.0  | 1.0  | 1.0  | 1.0  | ULK1      |
| 9706   | 1.0  | -4.1 | -5.9 | -5.0 | ULK2      |
| 54986  | -6.0 | 1.0  | 1.0  | 2.6  | ULK4      |
| 89766  | 1.0  | 5.1  | 4.0  | 5.3  | UMODL1    |
| 9094   | 1.0  | 1.0  | 1.0  | 1.0  | UNC119    |
| 10497  | 1.0  | 1.0  | 4.5  | 1.0  | UNC13B    |
| 55898  | 1.8  | 1.0  | 2.6  | 1.0  | UNC45A    |
| 219699 | 1.0  | 1.0  | -6.2 | 1.0  | UNC5B     |
| 285175 | 3.0  | -2.7 | -4.5 | 1.0  | UNC80     |
| 81622  | 1.0  | 1.0  | -4.0 | 1.0  | UNC93B1   |
| 85451  | 1.0  | 1.0  | 1.0  | 1.0  | UNK       |
| 64718  | 1.8  | 1.0  | -3.3 | 1.0  | UNKL      |
| 51733  | 1.0  | 3.1  | 3.4  | 3.2  | UPB1      |
| 26019  | 1.0  | 1.0  | 4.0  | 1.8  | UPF2      |
| 11045  | 1.0  | 5.7  | 6.7  | 6.6  | UPK1A     |
| 7380   | 1.0  | 1.0  | 4.7  | 1.0  | UPK3A     |
| 7378   | -1.8 | 1.0  | 1.0  | 1.0  | UPP1      |
| 55245  | 1.0  | 1.0  | 1.0  | 3.4  | UQCC      |
| 29796  | 1.0  | 1.0  | 5.4  | 4.8  | UQCR10    |
| 7381   | 1.0  | 1.0  | -3.9 | 1.0  | UQCRB     |
| 7384   | 1.0  | 1.0  | 1.0  | 1.0  | UQCRC1    |
| 7385   | 1.0  | 1.0  | 1.0  | -2.6 | UQCRC2    |
| 7388   | 1.0  | 1.0  | 1.0  | 1.0  | UQCRH     |
| 27089  | 1.0  | 1.0  | -2.6 | 1.0  | UQCRQ     |
| 9875   | 2.7  | 2.3  | 1.0  | 1.0  | URB1      |
| 9816   | 1.0  | 1.9  | 1.0  | 1.0  | URB2      |
| 55665  | -3.4 | 1.0  | 1.0  | 1.0  | URGCP     |
| 131669 | 1.0  | 1.0  | 1.0  | 1.0  | UROC1     |

|        |      |      |      |      |        |
|--------|------|------|------|------|--------|
| 7390   | 1.0  | 1.0  | -3.5 | 1.0  | UROS   |
| 7392   | 1.0  | 1.0  | 1.0  | 1.0  | USF2   |
| 7399   | 1.7  | -8.6 | -4.3 | -4.9 | USH2A  |
| 83878  | 1.0  | 1.0  | 1.0  | 1.0  | USHBP1 |
| 9100   | 1.0  | 1.0  | -2.2 | 1.0  | USP10  |
| 8237   | 1.0  | 1.0  | 3.6  | 4.1  | USP11  |
| 9958   | 1.7  | 1.0  | 1.0  | 1.0  | USP15  |
| 10600  | 1.0  | 1.0  | -6.1 | 1.0  | USP16  |
| 10869  | -3.7 | 1.0  | 1.0  | 1.0  | USP19  |
| 9099   | 2.8  | 1.0  | 2.9  | 2.6  | USP2   |
| 27005  | -1.7 | -2.6 | -2.1 | -2.3 | USP21  |
| 29761  | 1.0  | 1.0  | 1.0  | 1.0  | USP25  |
| 57663  | 1.0  | 1.0  | 1.0  | 1.0  | USP29  |
| 57602  | 1.0  | 1.0  | 1.0  | 1.0  | USP36  |
| 373856 | 1.0  | 1.0  | 2.1  | 3.0  | USP41  |
| 84132  | 1.0  | 1.0  | -7.0 | 1.0  | USP42  |
| 85015  | -3.3 | 1.0  | -7.8 | -9.1 | USP45  |
| 84196  | 1.0  | 1.0  | 1.0  | 1.0  | USP48  |
| 25862  | 1.0  | 1.0  | 1.0  | 1.0  | USP49  |
| 8078   | 1.0  | -5.1 | 1.0  | 1.0  | USP5   |
| 158880 | 1.0  | 1.0  | -6.0 | 1.0  | USP51  |
| 54532  | 1.0  | 1.0  | 1.0  | 1.0  | USP53  |
| 9098   | 1.0  | 1.0  | 1.0  | -6.4 | USP6   |
| 51118  | 1.0  | 1.0  | 1.0  | 1.0  | UTP11L |
| 10813  | 1.7  | 1.0  | 1.0  | -2.5 | UTP14A |
| 84135  | 1.0  | 1.0  | 1.0  | 1.0  | UTP15  |
| 27340  | 1.0  | 1.0  | 1.0  | 1.0  | UTP20  |
| 84294  | 1.0  | 1.0  | 1.0  | 1.0  | UTP23  |
| 7402   | 1.0  | 1.0  | 1.0  | 1.0  | UTRN   |
| 7404   | -1.8 | 1.0  | -3.5 | 1.0  | UTY    |
| 7405   | 1.0  | 1.0  | 1.0  | 1.0  | UVRAG  |
| 55697  | -2.3 | 1.0  | 1.0  | 1.0  | VAC14  |
| 8674   | -1.5 | -7.3 | -9.5 | 1.0  | VAMP4  |
| 10791  | 1.0  | 1.0  | 1.0  | 1.0  | VAMP5  |
| 7407   | 2.9  | -3.3 | -3.1 | 1.0  | VAR5   |
| 57176  | 1.5  | 1.0  | 1.0  | 3.7  | VAR52  |
| 22846  | 1.6  | 1.0  | 1.0  | 1.0  | VASH1  |
| 79805  | 1.0  | 2.4  | 2.6  | 2.3  | VASH2  |
| 7408   | 1.0  | -2.2 | 1.0  | 1.0  | VASP   |
| 57687  | 1.0  | -5.7 | 1.0  | 1.0  | VAT1L  |
| 10451  | 1.0  | -3.0 | 1.0  | 1.0  | VAV3   |
| 25806  | -1.5 | 1.0  | 1.0  | 1.0  | VAX2   |
| 7412   | 1.0  | 1.0  | 1.0  | 1.0  | VCAM1  |
| 7415   | 1.0  | 1.0  | 1.0  | 1.0  | VCP    |
| 51480  | 2.2  | -2.5 | 1.0  | 1.0  | VCX2   |
| 7416   | 1.0  | -4.4 | 1.0  | 1.0  | VDAC1  |
| 7417   | 1.5  | 1.0  | -3.3 | 1.0  | VDAC2  |
| 7421   | 1.0  | 1.0  | 1.0  | 1.0  | VDR    |

|        |      |      |      |      |         |
|--------|------|------|------|------|---------|
| 7422   | 1.0  | 1.0  | 1.0  | 1.0  | VEGFA   |
| 79674  | 1.0  | -7.4 | 1.0  | 1.0  | VEPH1   |
| 55591  | 1.0  | 1.0  | 1.0  | 1.0  | VEZT    |
| 51442  | 1.0  | -3.6 | -5.1 | 1.0  | VGLL1   |
| 389136 | 1.0  | 1.0  | 1.0  | 1.0  | VGLL3   |
| 9686   | -5.4 | 1.0  | -4.6 | 1.0  | VGLL4   |
| 7431   | -2.5 | 1.0  | 1.0  | 1.0  | VIM     |
| 7432   | 1.0  | 1.0  | -5.2 | 1.0  | VIP     |
| 7434   | 1.0  | 1.0  | 2.3  | 1.0  | VIPR2   |
| 79001  | 1.0  | 3.8  | 1.0  | 1.0  | VKORC1  |
| 8875   | 1.0  | 1.0  | -4.1 | 1.0  | VNN2    |
| 9730   | 2.1  | 1.0  | -4.7 | 1.0  | VPRBP   |
| 7441   | 1.0  | 1.0  | 1.0  | 1.0  | VPREB1  |
| 55187  | 1.0  | -5.0 | -2.8 | -7.3 | VPS13D  |
| 57617  | 2.7  | 1.0  | 1.0  | 1.0  | VPS18   |
| 26276  | 1.0  | 1.0  | 1.0  | 1.0  | VPS33B  |
| 137492 | -1.5 | 2.5  | 1.0  | 1.0  | VPS37A  |
| 79720  | 1.0  | 1.0  | 3.6  | 1.0  | VPS37B  |
| 155382 | 1.0  | 2.6  | 1.0  | 2.5  | VPS37D  |
| 11311  | 2.6  | 6.7  | 1.0  | 2.7  | VPS45   |
| 27183  | 1.0  | 1.0  | 1.0  | 1.0  | VPS4A   |
| 6293   | 1.6  | 1.0  | 1.0  | -3.6 | VPS52   |
| 55275  | 1.0  | 4.9  | 5.5  | 6.1  | VPS53   |
| 6944   | 1.0  | -2.3 | 1.0  | 1.0  | VPS72   |
| 7443   | 1.0  | 5.7  | 1.0  | 5.3  | VRK1    |
| 7444   | 1.0  | 1.0  | -6.1 | 1.0  | VRK2    |
| 51231  | 1.0  | 1.0  | 1.0  | 2.7  | VRK3    |
| 340547 | 1.0  | 1.0  | 1.0  | 4.9  | VSIG1   |
| 54621  | 4.5  | 1.0  | 1.0  | 1.0  | VSIG10  |
| 147645 | 3.3  | -2.9 | -3.3 | -2.4 | VSIG10L |
| 23584  | 1.0  | 1.0  | 1.0  | 1.0  | VSIG2   |
| 11326  | -6.1 | 4.2  | 3.8  | 1.0  | VSIG4   |
| 222008 | 1.0  | 1.0  | -4.1 | 1.0  | VSTM2A  |
| 128434 | 1.0  | 1.0  | 1.0  | 1.0  | VSTM2L  |
| 196740 | 10.8 | 1.0  | 1.0  | 1.0  | VSTM4   |
| 30813  | 2.1  | 1.0  | 1.0  | 1.0  | VSX1    |
| 51534  | -1.9 | 1.0  | -2.3 | 1.0  | VTA1    |
| 143187 | 1.0  | 1.0  | 1.0  | 3.0  | VTI1A   |
| 200403 | 1.0  | -6.3 | 1.0  | 1.0  | VWA3B   |
| 4013   | 2.0  | 1.0  | 1.0  | 1.0  | VWA5A   |
| 127731 | 1.0  | 1.0  | 1.0  | -3.5 | VWA5B1  |
| 220001 | 1.0  | 1.0  | 1.0  | 1.0  | VWCE    |
| 221806 | 1.0  | 1.0  | 1.0  | 1.0  | VWDE    |
| 51322  | -2.4 | 1.0  | 1.0  | 1.0  | WAC     |
| 8936   | 1.0  | 1.0  | 1.0  | -2.6 | WASF1   |
| 10163  | 1.0  | 1.0  | 1.8  | 1.0  | WASF2   |
| 10810  | 1.0  | 1.0  | 1.0  | 1.0  | WASF3   |
| 23559  | 1.0  | 1.0  | 1.0  | 1.0  | WBP1    |



|        |      |      |      |      |         |
|--------|------|------|------|------|---------|
| 164684 | 2.2  | -2.2 | -4.6 | -2.8 | WBP2NL  |
| 114049 | 1.8  | 1.0  | 1.0  | 3.6  | WBSCR22 |
| 155368 | 1.0  | 1.0  | 1.0  | 1.0  | WBSCR27 |
| 57705  | 1.0  | 1.0  | 1.0  | 1.0  | WDFY4   |
| 11169  | 1.0  | 1.0  | 2.4  | 3.0  | WDHD1   |
| 9948   | 1.0  | -2.2 | -3.9 | 1.0  | WDR1    |
| 55717  | 1.0  | 1.0  | 1.0  | 1.0  | WDR11   |
| 116966 | 1.0  | 1.0  | -4.7 | 1.0  | WDR17   |
| 57728  | 1.0  | 1.0  | 1.0  | -3.3 | WDR19   |
| 84219  | 1.0  | 1.0  | 1.0  | 1.0  | WDR24   |
| 79446  | 1.0  | 1.0  | 1.0  | 1.7  | WDR25   |
| 114987 | 1.0  | -2.1 | 1.0  | 1.0  | WDR31   |
| 55339  | -4.5 | -2.4 | -9.0 | 1.0  | WDR33   |
| 57539  | 1.0  | 1.0  | 1.0  | -4.8 | WDR35   |
| 10785  | 1.0  | 1.0  | 1.0  | 1.0  | WDR4    |
| 23160  | 1.0  | 1.0  | 1.0  | -5.8 | WDR43   |
| 9277   | -1.6 | -3.7 | 1.0  | 1.0  | WDR46   |
| 11091  | 1.0  | 1.0  | 2.3  | 1.0  | WDR5    |
| 55112  | 1.0  | 2.6  | 1.0  | 1.0  | WDR60   |
| 126820 | 1.0  | 1.0  | 1.0  | 3.0  | WDR63   |
| 144406 | 1.0  | 1.0  | -3.6 | 1.0  | WDR66   |
| 84942  | 1.0  | -2.4 | 1.0  | 1.0  | WDR73   |
| 79968  | 1.0  | 1.0  | 1.0  | 1.0  | WDR76   |
| 79084  | 1.0  | 1.0  | 1.5  | 1.0  | WDR77   |
| 79819  | 1.0  | 1.0  | 1.0  | 1.0  | WDR78   |
| 80335  | 1.0  | 1.0  | 1.0  | 1.0  | WDR82   |
| 84292  | 2.1  | -2.4 | 1.0  | 1.0  | WDR83   |
| 83889  | 1.0  | 1.0  | 1.0  | -2.6 | WDR87   |
| 197335 | 1.0  | 1.0  | 1.0  | 1.0  | WDR90   |
| 29062  | 1.0  | 1.0  | 1.0  | 1.0  | WDR91   |
| 56964  | 1.0  | 1.0  | 1.0  | 1.0  | WDR93   |
| 23038  | 1.8  | 1.0  | 1.0  | -3.0 | WDTC1   |
| 7465   | 1.0  | 1.0  | 3.4  | 3.4  | WEE1    |
| 140832 | 1.0  | 1.0  | 1.0  | 1.0  | WFDC10A |
| 280664 | 4.1  | 1.0  | 1.0  | 1.0  | WFDC10B |
| 259239 | 1.0  | 1.0  | 5.1  | 1.0  | WFDC11  |
| 140870 | 1.0  | 1.0  | -4.2 | 1.0  | WFDC6   |
| 124857 | 1.0  | 1.0  | 1.0  | 3.1  | WFIKKN2 |
| 7466   | 1.0  | 1.0  | 3.2  | 2.2  | WFS1    |
| 123720 | 1.0  | 1.0  | 1.0  | -6.0 | WHAMM   |
| 7468   | 1.0  | 1.0  | 1.0  | 1.0  | WHSC1   |
| 54904  | 1.0  | 1.0  | 1.0  | 1.0  | WHSC1L1 |
| 84305  | -1.5 | 1.0  | 1.0  | 1.0  | WIBG    |
| 644150 | 1.0  | -7.8 | 1.0  | 1.0  | WIPF3   |
| 55062  | 1.0  | 1.0  | 1.0  | 1.0  | WIPI1   |
| 26100  | 1.0  | 1.0  | 1.0  | 1.0  | WIPI2   |
| 8839   | 1.0  | 1.0  | 1.0  | 1.0  | WISP2   |
| 79971  | 1.0  | 2.6  | 1.0  | 1.0  | WLS     |

|        |       |      |      |      |         |
|--------|-------|------|------|------|---------|
| 65125  | 1.0   | 1.0  | 1.0  | 1.0  | WNK1    |
| 65268  | 1.0   | 1.0  | 1.0  | 1.0  | WNK2    |
| 65267  | 1.0   | -6.3 | -8.0 | -7.6 | WNK3    |
| 7473   | 1.0   | 1.0  | 1.0  | 1.0  | WNT3    |
| 7476   | 1.0   | 1.0  | 1.0  | 1.0  | WNT7A   |
| 7477   | 1.0   | 2.7  | 4.7  | 3.1  | WNT7B   |
| 55135  | 3.1   | 1.0  | 1.0  | 1.0  | WRAP53  |
| 49856  | 1.0   | 1.0  | 1.0  | 1.0  | WRAP73  |
| 7485   | 1.0   | -2.4 | 1.0  | 1.0  | WRB     |
| 7486   | 1.0   | 1.0  | 1.0  | 1.0  | WRN     |
| 26118  | 1.0   | 2.7  | 2.6  | 1.0  | WSB1    |
| 9671   | 1.0   | 1.0  | 1.0  | 1.0  | WSCD2   |
| 9589   | 1.6   | 1.0  | 1.0  | 1.0  | WTAP    |
| 23286  | 1.0   | 1.0  | 1.0  | 1.0  | WWC1    |
| 51741  | 1.0   | 1.0  | -3.2 | 1.0  | WWOX    |
| 11059  | 1.0   | 1.0  | 1.0  | 1.0  | WWP1    |
| 11060  | 1.0   | 1.0  | 1.0  | 1.0  | WWP2    |
| 25937  | 1.6   | 1.0  | -8.1 | 1.0  | WWTR1   |
| 54739  | 6.5   | 1.0  | -5.0 | 1.0  | XAF1    |
| 170626 | 1.0   | 1.0  | 1.0  | 1.0  | XAGE3   |
| 170627 | 1.0   | 1.0  | -2.4 | -1.8 | XAGE5   |
| 331    | 1.0   | 1.0  | 1.0  | 1.0  | XIAP    |
| 150165 | 1.0   | 1.0  | 2.6  | 1.0  | XKR3    |
| 114786 | -2.1  | 1.0  | -4.7 | 1.0  | XKR4    |
| 389610 | 1.0   | 1.0  | -3.5 | 1.0  | XKR5    |
| 55113  | 1.0   | 5.8  | 6.7  | 3.4  | XKR8    |
| 7507   | 1.0   | 3.1  | 1.0  | 1.0  | XPA     |
| 7511   | 1.0   | 3.5  | 1.0  | 1.0  | XPNPEP1 |
| 64328  | 1.7   | 1.0  | 1.0  | 1.0  | XPO4    |
| 9213   | 1.9   | 1.0  | 1.0  | 1.0  | XPR1    |
| 7516   | 1.0   | 2.6  | 1.0  | 1.0  | XRCC2   |
| 7517   | 1.6   | -4.2 | -4.9 | -5.1 | XRCC3   |
| 2547   | 1.0   | -5.3 | -5.2 | 1.0  | XRCC6   |
| 22803  | 1.5   | 1.0  | 1.0  | 1.0  | XRN2    |
| 152002 | 1.0   | 1.0  | 3.7  | 1.0  | XXYL1   |
| 64132  | -3.0  | 1.0  | 1.0  | 1.0  | XYLT2   |
| 8565   | -5.4  | 1.0  | -6.9 | 1.0  | YARS    |
| 54059  | 1.0   | -3.4 | 1.0  | -3.2 | YBEY    |
| 4904   | 1.0   | 2.4  | 2.4  | 1.0  | YBX1    |
| 51087  | 3.9   | 1.0  | 1.0  | 1.0  | YBX2    |
| 150223 | 1.0   | 1.0  | 1.0  | 1.0  | YDJC    |
| 8089   | 1.0   | 1.0  | 1.0  | 1.0  | YEATS4  |
| 54432  | 1.0   | 1.0  | 1.0  | 1.0  | YIPF1   |
| 25844  | 1.0   | 1.0  | 1.0  | 1.0  | YIPF3   |
| 286451 | 1.0   | 3.2  | 3.9  | 3.3  | YIPF6   |
| 56252  | 1.0   | 1.0  | 1.8  | 1.0  | YLPM1   |
| 10730  | 1.0   | 1.0  | 1.0  | -3.3 | YME1L1  |
| 55432  | -10.5 | 1.0  | 1.0  | 1.0  | YOD1    |

|        |      |      |      |      |          |
|--------|------|------|------|------|----------|
| 29799  | 4.2  | -2.8 | 1.0  | 1.0  | YPEL1    |
| 388403 | -1.7 | 1.0  | -3.4 | 1.0  | YPEL2    |
| 51646  | 1.0  | 1.0  | 1.6  | 1.0  | YPEL5    |
| 91746  | 1.0  | 4.7  | 1.0  | 1.0  | YTHDC1   |
| 54915  | 1.0  | 1.0  | 1.0  | 1.0  | YTHDF1   |
| 51441  | 1.0  | 1.0  | 1.0  | 1.0  | YTHDF2   |
| 253943 | 1.0  | 1.0  | 1.0  | -3.1 | YTHDF3   |
| 7531   | 1.0  | 1.0  | 1.0  | 1.0  | YWHAE    |
| 7532   | 1.0  | 1.0  | 1.0  | 1.0  | YWHAG    |
| 7533   | 1.0  | 1.0  | 2.2  | 2.3  | YWHAH    |
| 10971  | 1.0  | 4.3  | 5.2  | 4.9  | YWHAQ    |
| 7534   | 1.0  | 1.0  | -6.1 | 1.0  | YWHAZ    |
| 353174 | 1.0  | 1.0  | 1.0  | 1.0  | ZACN     |
| 284273 | 1.0  | 2.4  | 2.0  | 1.0  | ZADH2    |
| 7455   | 1.0  | 1.0  | 1.0  | 1.0  | ZAN      |
| 7535   | 1.0  | 1.0  | 1.0  | 1.0  | ZAP70    |
| 326340 | 1.0  | 1.0  | -1.9 | 1.0  | ZAR1     |
| 79413  | 1.0  | 1.0  | 1.0  | 1.0  | ZBED2    |
| 58486  | 1.0  | 1.0  | 1.0  | 1.0  | ZBED5    |
| 27107  | 1.0  | 1.0  | 1.0  | 1.0  | ZBTB11   |
| 7704   | 1.0  | -3.2 | 1.0  | 1.0  | ZBTB16   |
| 57621  | 1.0  | 1.0  | 1.0  | 1.0  | ZBTB2    |
| 9278   | 1.8  | 3.0  | 2.9  | 3.0  | ZBTB22   |
| 9841   | 1.0  | 1.0  | 1.0  | 1.0  | ZBTB24   |
| 79842  | 1.0  | 1.0  | 1.0  | 1.0  | ZBTB3    |
| 27033  | 1.0  | 1.0  | -6.9 | -5.0 | ZBTB32   |
| 84614  | 1.0  | 1.0  | 1.0  | 1.0  | ZBTB37   |
| 57659  | 1.0  | 1.0  | 1.0  | 1.0  | ZBTB4    |
| 23099  | -2.0 | 1.0  | -7.3 | -7.0 | ZBTB43   |
| 84878  | 1.5  | 1.0  | -4.3 | 1.0  | ZBTB45   |
| 92999  | 1.0  | 2.4  | 1.0  | 3.3  | ZBTB47   |
| 3104   | 1.0  | 1.0  | 1.0  | 1.0  | ZBTB48   |
| 9925   | 1.0  | 5.0  | 1.0  | 1.0  | ZBTB5    |
| 51341  | 1.0  | 2.6  | 1.0  | 1.0  | ZBTB7A   |
| 201501 | 2.7  | -2.9 | 1.0  | -2.7 | ZBTB7C   |
| 9877   | 1.0  | 1.0  | 1.0  | 1.0  | ZC3H11A  |
| 340152 | 1.0  | 1.0  | 2.6  | 1.0  | ZC3H12D  |
| 124245 | 1.0  | 1.0  | 1.0  | 1.0  | ZC3H18   |
| 92092  | -8.6 | 1.0  | -2.5 | 1.0  | ZC3HAV1L |
| 51530  | -2.5 | 1.0  | 4.6  | 1.0  | ZC3HC1   |
| 55906  | 1.0  | 1.0  | 1.0  | 2.3  | ZC4H2    |
| 54819  | 1.0  | 1.0  | 1.0  | -7.1 | ZCCHC10  |
| 23318  | 1.0  | 5.2  | 4.7  | 6.6  | ZCCHC11  |
| 23174  | 1.6  | 1.0  | -2.1 | 1.0  | ZCCHC14  |
| 84240  | 1.0  | 1.0  | 1.0  | 1.0  | ZCCHC9   |
| 85437  | 1.0  | 1.0  | -7.7 | 1.0  | ZCRB1    |
| 55063  | 1.0  | 1.0  | 1.0  | 2.6  | ZCWPW1   |
| 29800  | -2.5 | 1.0  | 1.0  | -4.8 | ZDHHC1   |

|        |       |      |      |      |          |
|--------|-------|------|------|------|----------|
| 54503  | 1.0   | 1.0  | 3.3  | 1.0  | ZDHH13   |
| 79683  | 1.0   | 1.0  | 1.0  | 1.0  | ZDHH14   |
| 158866 | 1.0   | -6.2 | 1.0  | 1.0  | ZDHH15   |
| 84287  | 1.0   | 1.0  | 1.0  | -3.5 | ZDHH16   |
| 131540 | 1.0   | 1.0  | 1.0  | 1.0  | ZDHH19   |
| 253832 | -2.7  | 1.0  | 3.7  | 5.0  | ZDHH20   |
| 340481 | 1.0   | 1.0  | 1.0  | 1.0  | ZDHH21   |
| 254887 | 1.0   | 1.0  | 1.0  | 1.0  | ZDHH23   |
| 29801  | 1.0   | 3.1  | 1.0  | 5.3  | ZDHH8    |
| 150244 | 1.0   | 1.0  | 1.0  | 1.0  | ZDHH8P1  |
| 79752  | 1.0   | 1.0  | 1.0  | 1.0  | ZFAND1   |
| 90637  | 1.0   | 1.0  | 1.0  | 1.0  | ZFAND2A  |
| 130617 | 1.0   | -2.5 | 1.0  | 1.0  | ZFAND2B  |
| 93550  | -2.4  | -7.1 | 1.0  | 1.0  | ZFAND4   |
| 57623  | -12.5 | 4.3  | -7.2 | -4.5 | ZFAT     |
| 196441 | 1.0   | -4.8 | 1.0  | -5.8 | ZFC3H1   |
| 85446  | 1.6   | -7.7 | -6.9 | -7.9 | ZFH2     |
| 162239 | 1.0   | 1.0  | -5.1 | 1.0  | ZFP1     |
| 57677  | 1.0   | 1.0  | 1.0  | 1.0  | ZFP14    |
| 140612 | 1.0   | 1.0  | 1.0  | 1.0  | ZFP28    |
| 677    | 1.0   | 3.2  | 1.0  | 1.0  | ZFP36L1  |
| 678    | 1.0   | -2.8 | 1.0  | 1.0  | ZFP36L2  |
| 286128 | 3.2   | 1.0  | 1.0  | 4.5  | ZFP41    |
| 643836 | -1.8  | 1.0  | 1.0  | 1.0  | ZFP62    |
| 55734  | 1.0   | 4.0  | 4.6  | 3.2  | ZFP64    |
| 80829  | 1.0   | 1.0  | 1.0  | 3.7  | ZFP91    |
| 51663  | 1.0   | 1.0  | 1.0  | 1.0  | ZFR      |
| 23217  | 6.2   | 5.7  | 1.0  | 2.7  | ZFR2     |
| 7543   | 1.8   | 1.0  | 1.0  | 1.0  | ZFX      |
| 9765   | -1.5  | 1.0  | 1.0  | 1.0  | ZFYVE16  |
| 118813 | 1.0   | 1.0  | 1.0  | 1.0  | ZFYVE27  |
| 57732  | 1.0   | 1.0  | 6.4  | 1.0  | ZFYVE28  |
| 11244  | 1.0   | 1.0  | 1.0  | 1.0  | ZHX1     |
| 22882  | 1.0   | 1.0  | 1.0  | 1.0  | ZHX2     |
| 7545   | 1.0   | 1.0  | 1.0  | -2.7 | ZIC1     |
| 7547   | 1.0   | 1.0  | 1.0  | 1.0  | ZIC3     |
| 284307 | 1.0   | 1.0  | 1.0  | 1.0  | ZIK1     |
| 342357 | 1.0   | 1.0  | 1.0  | 1.0  | ZKSCAN2  |
| 23660  | 1.0   | 1.0  | 1.0  | 1.0  | ZKSCAN5  |
| 10269  | 1.0   | 5.3  | 1.0  | 4.5  | ZMPSTE24 |
| 79830  | 1.0   | 1.0  | 1.0  | 1.0  | ZMYM1    |
| 7750   | 1.0   | 2.5  | 1.0  | 1.0  | ZMYM2    |
| 9202   | 1.0   | 1.0  | -3.1 | 1.0  | ZMYM4    |
| 9205   | -3.7  | 1.0  | 1.0  | 1.0  | ZMYM5    |
| 9204   | 1.0   | 1.0  | 1.0  | 1.0  | ZMYM6    |
| 118490 | 1.0   | 1.0  | 1.0  | 1.0  | ZMYND17  |
| 7556   | 1.0   | 1.0  | 1.0  | 1.0  | ZNF10    |
| 163227 | 2.2   | 1.0  | 1.0  | -5.4 | ZNF100   |

|        |       |       |       |      |         |
|--------|-------|-------|-------|------|---------|
| 51351  | -1.8  | 1.0   | 1.0   | 1.0  | ZNF117  |
| 7678   | 1.0   | -5.2  | 1.0   | -3.7 | ZNF124  |
| 7693   | 1.0   | 1.0   | 1.0   | 1.0  | ZNF134  |
| 7695   | 1.0   | 1.0   | 1.0   | 1.0  | ZNF136  |
| 7561   | 1.0   | 1.0   | 1.0   | -2.2 | ZNF14   |
| 7700   | 2.2   | 1.0   | 5.9   | 1.0  | ZNF141  |
| 7702   | 1.0   | -2.4  | -5.0  | -3.7 | ZNF143  |
| 7705   | 5.2   | 1.0   | 1.0   | 1.0  | ZNF146  |
| 7707   | 5.8   | 1.0   | 1.0   | 1.5  | ZNF148  |
| 90338  | 1.9   | -3.1  | 1.0   | 1.0  | ZNF160  |
| 7718   | 1.0   | 1.0   | 1.0   | 1.0  | ZNF165  |
| 55888  | 2.9   | -4.5  | -2.2  | 1.0  | ZNF167  |
| 169841 | 1.0   | -3.2  | 1.0   | 1.0  | ZNF169  |
| 7727   | 1.0   | 1.0   | -2.8  | 1.0  | ZNF174  |
| 7741   | 1.0   | 1.0   | 1.0   | 1.0  | ZNF187  |
| 7567   | -2.7  | -2.7  | 1.0   | 1.0  | ZNF19   |
| 7745   | -1.6  | 1.0   | 1.0   | 1.0  | ZNF192  |
| 7753   | 1.0   | 1.0   | 1.0   | 1.0  | ZNF202  |
| 7988   | 1.0   | 1.0   | 3.6   | 3.0  | ZNF212  |
| 7760   | 1.7   | 1.0   | 1.0   | 1.0  | ZNF213  |
| 51222  | 1.0   | 1.0   | 1.0   | 1.0  | ZNF219  |
| 7768   | 1.0   | 1.0   | 1.0   | -6.8 | ZNF225  |
| 7769   | 1.0   | 1.0   | 1.0   | 1.0  | ZNF226  |
| 353355 | 1.0   | -7.6  | -11.8 | -7.6 | ZNF233  |
| 10780  | 1.0   | 1.0   | -3.9  | 1.0  | ZNF234  |
| 7776   | 1.0   | 1.0   | 1.0   | 2.8  | ZNF236  |
| 7572   | 1.0   | 2.6   | 1.0   | 1.0  | ZNF24   |
| 219749 | 1.0   | 1.0   | 1.0   | 1.0  | ZNF25   |
| 56242  | 1.0   | 1.0   | -6.3  | 1.0  | ZNF253  |
| 8882   | 1.0   | 1.0   | 2.9   | 1.0  | ZNF259  |
| 10127  | 1.0   | 1.0   | 1.0   | 1.0  | ZNF263  |
| 9422   | -1.7  | 1.0   | 3.0   | 1.0  | ZNF264  |
| 10795  | 1.0   | 1.0   | 1.0   | 1.0  | ZNF268  |
| 10838  | 1.0   | 3.3   | 1.0   | 1.0  | ZNF275  |
| 92822  | 1.0   | 1.0   | 1.0   | 1.0  | ZNF276  |
| 7576   | -15.3 | 1.0   | 1.0   | 2.2  | ZNF28   |
| 129025 | 1.0   | 1.0   | 2.5   | 1.0  | ZNF280A |
| 140883 | 1.0   | 1.0   | 1.0   | 1.0  | ZNF280B |
| 54816  | 1.0   | -10.3 | 1.0   | 1.0  | ZNF280D |
| 342909 | 1.0   | 1.0   | -5.2  | -5.5 | ZNF284  |
| 26974  | 1.0   | 1.0   | 1.0   | 1.0  | ZNF285  |
| 49854  | 1.0   | -3.5  | -3.8  | 1.0  | ZNF295  |
| 7551   | 1.0   | 2.3   | 3.3   | 2.6  | ZNF3    |
| 91975  | -2.7  | -6.1  | -7.4  | -6.7 | ZNF300  |
| 55900  | 1.0   | 1.0   | 1.0   | 4.2  | ZNF302  |
| 162967 | 1.0   | 1.0   | 1.0   | 5.4  | ZNF320  |
| 79692  | 1.0   | 1.0   | 1.0   | 1.0  | ZNF322  |
| 25799  | 1.0   | 3.3   | 1.8   | 1.0  | ZNF324  |

|           |      |      |      |      |            |
|-----------|------|------|------|------|------------|
| 27309     | 1.0  | 1.0  | 1.0  | -2.5 | ZNF330     |
| 55422     | 1.0  | 3.6  | 1.0  | 2.6  | ZNF331     |
| 84449     | 3.0  | 1.0  | 2.9  | 1.0  | ZNF333     |
| 55713     | -7.8 | 1.0  | 1.0  | 1.0  | ZNF334     |
| 80778     | 1.0  | 1.0  | 1.0  | 1.0  | ZNF34      |
| 79175     | -1.8 | 1.0  | -4.2 | 1.0  | ZNF343     |
| 30832     | 1.0  | -5.2 | 1.0  | 1.0  | ZNF354C    |
| 22891     | 1.0  | 1.0  | 1.0  | 1.0  | ZNF365     |
| 100129482 | 1.0  | 1.0  | 1.0  | 1.0  | ZNF37BP    |
| 171017    | 1.0  | 1.0  | 3.5  | 1.0  | ZNF384     |
| 25946     | -2.7 | 1.0  | 1.0  | 1.0  | ZNF385A    |
| 79750     | 1.0  | 6.5  | 3.5  | 3.7  | ZNF385D    |
| 84124     | 1.0  | -2.8 | -6.1 | 1.0  | ZNF394     |
| 252884    | -2.2 | -4.3 | -4.8 | -4.8 | ZNF396     |
| 55628     | 2.3  | 5.9  | 1.0  | 1.0  | ZNF407     |
| 84330     | 1.0  | 1.0  | -3.1 | 1.0  | ZNF414     |
| 79744     | 2.0  | 1.0  | 1.0  | 1.0  | ZNF419     |
| 79088     | -2.0 | 1.0  | -3.0 | 1.0  | ZNF426     |
| 126299    | 1.0  | 2.7  | 2.3  | 1.0  | ZNF428     |
| 353088    | 1.0  | 1.0  | 3.8  | 1.0  | ZNF429     |
| 54925     | 1.0  | 1.0  | 2.5  | 1.0  | ZNF434     |
| 90594     | 1.0  | 1.0  | 1.0  | 1.0  | ZNF439     |
| 126068    | 1.0  | 1.0  | -7.2 | 1.0  | ZNF441     |
| 79973     | 1.0  | -3.1 | -2.7 | -3.2 | ZNF442     |
| 7596      | 1.0  | 1.0  | 1.0  | 1.0  | ZNF45      |
| 26036     | 5.0  | 1.0  | -2.5 | -2.7 | ZNF451     |
| 92283     | 1.0  | 1.0  | 1.0  | 1.0  | ZNF461     |
| 90333     | 1.0  | 1.0  | 1.0  | 3.9  | ZNF468     |
| 84627     | -1.7 | 1.0  | 1.0  | 1.0  | ZNF469     |
| 83744     | 1.0  | 1.0  | 1.0  | 1.0  | ZNF484     |
| 90649     | 1.0  | 1.0  | 1.0  | -4.5 | ZNF486     |
| 57474     | 7.0  | 1.0  | 1.0  | 1.0  | ZNF490     |
| 284443    | 1.0  | -2.7 | -3.1 | 1.0  | ZNF493     |
| 84838     | 1.0  | 1.0  | 1.0  | 1.0  | ZNF496     |
| 162968    | 1.0  | 1.0  | 1.0  | 3.3  | ZNF497     |
| 221785    | 1.0  | 1.0  | 1.0  | 1.0  | ZNF498     |
| 84858     | 1.0  | 1.0  | 1.0  | 1.0  | ZNF503     |
| 253264    | 1.0  | 1.0  | 1.0  | 1.0  | ZNF503-AS1 |
| 22847     | 1.0  | 1.0  | 1.0  | 1.0  | ZNF507     |
| 118472    | 1.0  | -4.2 | 1.0  | -4.1 | ZNF511     |
| 57473     | 1.0  | 3.1  | 3.1  | 1.0  | ZNF512B    |
| 162655    | 1.0  | 1.0  | -5.6 | 1.0  | ZNF519     |
| 147807    | 1.0  | 1.0  | 1.0  | 1.0  | ZNF524     |
| 116115    | 1.0  | 1.0  | 1.0  | 1.0  | ZNF526     |
| 84436     | 1.0  | 1.0  | 1.0  | 1.0  | ZNF528     |
| 55205     | 1.0  | 1.0  | 1.0  | 1.0  | ZNF532     |
| 84215     | 1.0  | 3.2  | 1.0  | 2.4  | ZNF541     |
| 147947    | 1.0  | 1.0  | 1.0  | 1.0  | ZNF542     |

|        |       |      |      |      |         |
|--------|-------|------|------|------|---------|
| 284306 | 1.0   | -3.9 | -4.4 | -6.3 | ZNF547  |
| 115196 | 1.0   | -5.4 | 1.0  | 1.0  | ZNF554  |
| 147741 | 1.0   | 1.0  | 1.0  | 1.0  | ZNF560  |
| 147837 | 1.0   | -2.6 | 1.0  | 1.0  | ZNF563  |
| 148266 | 1.0   | 1.0  | -7.3 | -6.0 | ZNF569  |
| 51276  | 1.0   | 1.0  | -2.8 | 1.0  | ZNF571  |
| 137209 | 1.0   | 1.0  | 1.0  | 1.0  | ZNF572  |
| 284346 | 1.0   | 4.6  | 4.4  | 1.0  | ZNF575  |
| 84765  | 1.0   | 1.0  | -3.3 | 1.0  | ZNF577  |
| 147660 | 1.0   | 1.0  | 1.0  | 1.0  | ZNF578  |
| 147948 | 1.0   | -3.4 | 1.0  | -3.5 | ZNF582  |
| 147949 | 1.0   | 1.0  | 1.0  | -3.2 | ZNF583  |
| 201514 | 1.0   | 3.9  | 5.9  | 1.0  | ZNF584  |
| 199704 | 1.0   | 1.0  | 1.0  | 1.0  | ZNF585A |
| 54807  | 1.0   | 2.3  | 2.5  | 2.5  | ZNF586  |
| 84914  | -6.2  | 1.0  | 1.0  | 1.0  | ZNF587  |
| 9640   | 1.0   | 1.0  | 4.5  | 4.4  | ZNF592  |
| 152687 | 1.0   | -3.7 | 1.0  | 1.0  | ZNF595  |
| 90850  | 1.0   | 2.8  | 2.3  | 2.4  | ZNF598  |
| 148103 | 1.0   | 1.0  | 1.0  | -3.1 | ZNF599  |
| 162966 | 1.0   | 1.0  | 6.8  | 1.0  | ZNF600  |
| 57507  | 1.0   | -7.9 | 1.0  | 1.0  | ZNF608  |
| 79898  | 1.0   | -4.5 | 1.0  | 1.0  | ZNF613  |
| 284370 | 1.0   | 1.0  | 1.0  | 1.0  | ZNF615  |
| 285267 | 1.0   | 1.0  | 1.0  | 2.1  | ZNF619  |
| 253639 | 1.0   | 1.0  | -4.6 | -5.8 | ZNF620  |
| 90441  | 1.9   | 1.0  | 1.0  | 1.0  | ZNF622  |
| 9831   | 1.0   | 1.0  | 1.0  | 1.0  | ZNF623  |
| 57547  | 1.0   | 1.0  | 1.0  | 1.0  | ZNF624  |
| 90589  | 1.9   | -2.4 | -2.4 | -2.4 | ZNF625  |
| 199777 | 1.0   | 1.0  | 1.0  | 1.0  | ZNF626  |
| 199692 | 1.0   | 1.0  | 1.0  | 1.0  | ZNF627  |
| 57232  | 1.0   | 1.0  | 1.0  | 1.0  | ZNF630  |
| 27332  | -10.7 | 1.0  | -9.5 | -6.4 | ZNF638  |
| 158506 | 1.0   | 1.0  | 2.7  | 1.0  | ZNF645  |
| 9726   | 1.0   | 1.0  | 1.0  | 1.0  | ZNF646  |
| 79027  | 1.0   | -3.0 | 1.0  | 1.0  | ZNF655  |
| 26149  | -15.3 | 1.0  | 1.0  | 1.0  | ZNF658  |
| 144348 | 1.0   | 3.3  | 1.0  | 1.0  | ZNF664  |
| 79788  | 2.6   | 1.0  | 4.1  | 1.0  | ZNF665  |
| 63934  | 1.0   | 1.0  | 1.0  | 1.0  | ZNF667  |
| 641339 | 1.0   | 1.0  | 1.0  | 1.0  | ZNF674  |
| 163223 | -1.6  | 1.0  | -3.5 | 1.0  | ZNF676  |
| 340252 | 2.6   | -2.5 | 1.0  | 1.0  | ZNF680  |
| 148213 | 1.0   | 1.0  | 1.0  | 1.0  | ZNF681  |
| 257101 | 1.0   | 1.0  | 1.0  | 1.0  | ZNF683  |
| 7620   | 1.0   | -2.5 | 1.0  | 1.0  | ZNF69   |
| 55657  | 1.0   | 3.8  | 3.2  | 1.0  | ZNF692  |

|           |      |      |      |      |         |
|-----------|------|------|------|------|---------|
| 90874     | 1.0  | 1.0  | 4.1  | 1.0  | ZNF697  |
| 80139     | 1.0  | 1.0  | 1.0  | 5.1  | ZNF703  |
| 619279    | 1.0  | 1.0  | 1.8  | 1.0  | ZNF704  |
| 286075    | 1.0  | 1.0  | 1.0  | 1.0  | ZNF707  |
| 163051    | 1.0  | 1.0  | 1.0  | 1.0  | ZNF709  |
| 58491     | 1.0  | 1.0  | 1.0  | 1.0  | ZNF71   |
| 349075    | 5.4  | 5.8  | 7.2  | 1.0  | ZNF713  |
| 100131827 | 1.0  | 1.0  | 1.0  | 1.0  | ZNF717  |
| 124411    | 1.0  | 1.0  | 1.0  | 1.0  | ZNF720  |
| 100129842 | 1.0  | 1.0  | 1.0  | -2.7 | ZNF737  |
| 155061    | -1.5 | 1.0  | 1.0  | 1.0  | ZNF746  |
| 65988     | 5.0  | 1.0  | 9.0  | 1.0  | ZNF747  |
| 7627      | 1.0  | 1.0  | 1.0  | 1.0  | ZNF75A  |
| 7626      | 1.0  | 1.0  | 1.0  | 1.0  | ZNF75D  |
| 7629      | 1.0  | 1.0  | 1.0  | 4.8  | ZNF76   |
| 388561    | 2.2  | 3.6  | 1.0  | 1.0  | ZNF761  |
| 92595     | 1.0  | 1.7  | 1.0  | 1.0  | ZNF764  |
| 79724     | 1.0  | 1.0  | 1.0  | 1.0  | ZNF768  |
| 54989     | 1.0  | 2.1  | 1.0  | 1.0  | ZNF770  |
| 51333     | 1.0  | 1.0  | 1.0  | -2.6 | ZNF771  |
| 374928    | 1.0  | 1.0  | -5.9 | 1.0  | ZNF773  |
| 27153     | 1.0  | 1.0  | 1.0  | 1.0  | ZNF777  |
| 163131    | 1.0  | 1.0  | -7.8 | 1.0  | ZNF780B |
| 100289678 | 1.0  | 1.0  | 1.0  | 7.0  | ZNF783  |
| 388507    | 1.0  | 1.0  | 1.0  | 1.0  | ZNF788  |
| 126375    | 1.0  | 1.0  | 1.0  | 1.0  | ZNF792  |
| 7554      | 1.0  | 1.0  | 3.2  | 3.3  | ZNF8    |
| 168850    | 1.6  | 1.0  | -2.7 | -2.2 | ZNF800  |
| 347344    | 1.0  | 1.0  | 1.0  | 1.0  | ZNF81   |
| 729648    | 1.0  | 1.0  | 1.0  | 1.0  | ZNF812  |
| 374899    | 1.0  | 1.0  | 1.0  | 1.0  | ZNF829  |
| 128611    | 1.0  | 1.0  | 1.0  | 1.0  | ZNF831  |
| 55778     | 1.0  | 1.0  | 1.0  | 1.0  | ZNF839  |
| 284371    | 1.0  | 1.0  | 1.0  | 1.0  | ZNF841  |
| 91664     | 1.0  | 2.0  | 4.4  | 1.0  | ZNF845  |
| 7652      | 1.0  | 1.0  | 1.0  | 1.0  | ZNF99   |
| 57169     | 2.1  | 1.0  | 1.0  | 1.0  | ZNFX1   |
| 10467     | 1.0  | -3.2 | -2.7 | 1.0  | ZNHIT1  |
| 84133     | 1.0  | 1.0  | 1.0  | 1.0  | ZNRF3   |
| 148066    | 1.0  | 1.0  | 1.0  | -4.1 | ZNRF4   |
| 22917     | 1.0  | 1.0  | 1.0  | 1.0  | ZP1     |
| 7783      | 1.0  | 1.0  | -4.4 | 1.0  | ZP2     |
| 7784      | 1.0  | 1.0  | 1.0  | 1.0  | ZP3     |
| 11055     | 1.0  | 1.0  | 1.0  | 1.0  | ZPBP    |
| 84083     | -9.5 | 1.0  | 1.0  | 1.0  | ZRANB3  |
| 8233      | 1.0  | 1.0  | 1.0  | 1.0  | ZRSR2   |
| 9753      | 1.0  | 1.0  | 6.4  | 1.0  | ZSCAN12 |
| 80345     | 1.0  | -4.1 | -2.6 | 1.0  | ZSCAN16 |



|           |      |     |      |      |         |
|-----------|------|-----|------|------|---------|
| 100101467 | 1.0  | 1.0 | -4.2 | -4.1 | ZSCAN30 |
| 79149     | -1.9 | 1.0 | 1.0  | -5.9 | ZSCAN5A |
| 221302    | 12.1 | 1.0 | 1.0  | 7.9  | ZUFSP   |
| 9183      | 1.0  | 1.0 | 2.3  | 1.0  | ZW10    |
