# Supplementary material for: Comparative efficacy analysis of anti-microbial peptides, LL-37 and indolicidin upon conjugation with CNT, in human monocytes
Source: PubMed Central journal article supplement (PMC5469186; doi:10.1186/s12951-017-0278-1), 2017-06-12
Supplement: 12951_2017_278_MOESM3_ESM.pdf [file 12951_2017_278_MOESM3_ESM.pdf]

**Table S3: Expression of genes in terms of fold changes following treatment free and conjugated Indolicidin and other conditions**

| ProbeName    | Fold Change Values |            |          |         | GeneSymbol | n                                                                                             | EntrezGeneID |
|--------------|--------------------|------------|----------|---------|------------|-----------------------------------------------------------------------------------------------|--------------|
|              | CNT                | CNT + Indo | CNT-Indo | Indo-20 |            |                                                                                               |              |
| A_23_P38816  | 2.3                | 2.0        | 1.3      | 1.1     | A1BG       | Homo sapiens alpha-1-B glycoprotein (A1BG), mRNA [NM_130786]                                  | 1            |
| A_24_P721699 | -1.3               | 2.0        | -1.5     | 1.5     | A1BG-AS1   | Homo sapiens A1BG antisense RNA 1 (non-protein coding) (A1BG-AS1), non-coding RNA [NR_015380] | 503538       |
| A_23_P104224 | 3.4                | 2.1        | 2.5      | 2.6     | A1CF       | Homo sapiens APOBEC1 complementation factor (A1CF), transcript variant 3, mRNA [NM_138933]    | 29974        |

|              |      |      |      |      |        |                                                                                               |       |
|--------------|------|------|------|------|--------|-----------------------------------------------------------------------------------------------|-------|
| A_23_P57570  | -1.0 | -8.4 | -1.0 | -1.0 | A4GALT | Homo sapiens alpha 1,4-galactosyltransferase (A4GALT), mRNA [NM_017436]                       | 53947 |
| A_23_P58046  | 1.0  | -3.1 | 1.2  | 1.1  | A4GNT  | Homo sapiens alpha-1,4-N-acetylglucosaminyltransferase (A4GNT), mRNA [NM_016161]              | 51146 |
| A_24_P299271 | -1.5 | -2.4 | -1.7 | -1.4 | AAK1   | Homo sapiens AP2 associated kinase 1 (AAK1), mRNA [NM_014911]                                 | 22848 |
| A_23_P152527 | 2.2  | 2.1  | -1.2 | -2.4 | AANAT  | Homo sapiens aralkylamine N-acetyltransferase (AANAT), transcript variant 2, mRNA [NM_001088] | 15    |

|              |      |      |       |      |        |                                                                                                          |        |
|--------------|------|------|-------|------|--------|----------------------------------------------------------------------------------------------------------|--------|
| A_24_P172990 | -1.7 | -1.9 | -2.1  | -1.3 | AARS   | Homo sapiens alanyl-tRNA synthetase (AARS), mRNA [NM_001605]                                             | 16     |
| A_23_P207414 | -8.7 | 1.9  | 1.6   | -1.7 | AARSD1 | Homo sapiens alanyl-tRNA synthetase domain containing 1 (AARSD1), transcript variant 2, mRNA [NM_025267] | 80755  |
| A_24_P307195 | -2.4 | -1.0 | -16.8 | -1.3 | AASDH  | Homo sapiens aminoadipate-semialdehyde dehydrogenase (AASDH), mRNA [NM_181806]                           | 132949 |

|              |      |     |     |     |          |                                                                                                                                           |       |
|--------------|------|-----|-----|-----|----------|-------------------------------------------------------------------------------------------------------------------------------------------|-------|
| A_24_P184230 | -2.2 | 2.1 | 1.8 | 1.3 | AASDHPPT | Homo sapiens amino adipate-semialdehyde dehydrogenase-phosphoantetheinyl transferase (AASDHPPT), mRNA [NM_015423]                         | 60496 |
| A_23_P159169 | 4.3  | 4.3 | 3.2 | 1.5 | AATK     | Homo sapiens apoptosis-associated tyrosine kinase (AATK), transcript variant 1, mRNA [NM_001080395]                                       | 9625  |
| A_23_P152505 | 2.1  | 2.8 | 2.5 | 1.4 | ABAT     | Homo sapiens 4-aminobutyrate aminotransferase (ABAT), nuclear gene encoding mitochondrial protein, transcript variant 2, mRNA [NM_000663] | 18    |

|              |       |      |      |      |        |                                                                                              |       |
|--------------|-------|------|------|------|--------|----------------------------------------------------------------------------------------------|-------|
| A_24_P235429 | 1.9   | 2.1  | 2.0  | 2.0  | ABCA1  | Homo sapiens ATP-binding cassette, sub-family A (ABC1), member 1 (ABCA1), mRNA [NM_005502]   | 19    |
| A_23_P89422  | -18.0 | -1.6 | -1.9 | -2.0 | ABCA10 | Homo sapiens ATP-binding cassette, sub-family A (ABC1), member 10 (ABCA10), mRNA [NM_080282] | 10349 |
| A_23_P160940 | -2.4  | -2.0 | 1.6  | 1.0  | ABCA4  | Homo sapiens ATP-binding cassette, sub-family A (ABC1), member 4 (ABCA4), mRNA [NM_000350]   | 24    |

|              |       |     |      |      |        |                                                                                                                                              |       |
|--------------|-------|-----|------|------|--------|----------------------------------------------------------------------------------------------------------------------------------------------|-------|
| A_23_P39481  | 1.6   | 2.5 | 2.6  | 1.3  | ABCA7  | Homo sapiens ATP-binding cassette, sub-family A (ABC1), member 7 (ABCA7), mRNA [NM_019112]                                                   | 10347 |
| A_23_P118615 | -9.0  | 1.0 | 1.3  | 1.1  | ABCA8  | Homo sapiens ATP-binding cassette, sub-family A (ABC1), member 8 (ABCA8), mRNA [NM_007168]                                                   | 10351 |
| A_24_P324449 | -13.4 | 1.0 | -1.0 | -1.7 | ABCB10 | Homo sapiens ATP-binding cassette, sub-family B (MDR/TAP), member 10 (ABCB10), nuclear gene encoding mitochondrial protein, mRNA [NM_012089] | 23456 |

|              |     |      |      |     |        |                                                                                                                                              |        |
|--------------|-----|------|------|-----|--------|----------------------------------------------------------------------------------------------------------------------------------------------|--------|
| A_32_P23624  | 3.0 | 1.3  | 1.0  | 2.8 | ABCB10 | Homo sapiens ATP-binding cassette, sub-family B (MDR/TAP), member 10 (ABCB10), nuclear gene encoding mitochondrial protein, mRNA [NM_012089] | 23456  |
| A_23_P111662 | 1.1 | -2.4 | -1.0 | 1.0 | ABCB5  | Homo sapiens ATP-binding cassette, sub-family B (MDR/TAP), member 5 (ABCB5), transcript variant 2, mRNA [NM_178559]                          | 340273 |

|              |      |      |      |     |       |                                                                                                                                            |       |
|--------------|------|------|------|-----|-------|--------------------------------------------------------------------------------------------------------------------------------------------|-------|
| A_23_P171258 | 23.7 | 10.7 | 9.5  | 2.2 | ABCB7 | Homo sapiens ATP-binding cassette, sub-family B (MDR/TAP), member 7 (ABCB7), nuclear gene encoding mitochondrial protein, mRNA [NM_004299] | 22    |
| A_23_P128094 | 1.0  | 1.0  | -1.0 | 2.6 | ABCB9 | Homo sapiens ATP-binding cassette, sub-family B (MDR/TAP), member 9 (ABCB9), transcript variant 1, mRNA [NM_019625]                        | 23457 |



|              |      |      |      |      |        |                                                                                                                                              |        |
|--------------|------|------|------|------|--------|----------------------------------------------------------------------------------------------------------------------------------------------|--------|
| A_23_P166207 | 3.5  | 3.7  | 2.6  | -1.2 | ABCC13 | Homo sapiens ATP-binding cassette, sub-family C (CFTR/MRP), member 13, pseudogene (ABCC13), transcript variant A, non-coding RNA [NR_003087] | 150000 |
| A_23_P307570 | -1.0 | -1.0 | -3.7 | 1.0  | ABCC13 | Homo sapiens ATP-binding cassette, sub-family C (CFTR/MRP), member 13, pseudogene (ABCC13), transcript variant A, non-coding RNA [NR_003087] | 150000 |

|              |      |      |      |     |       |                                                                                                                      |       |
|--------------|------|------|------|-----|-------|----------------------------------------------------------------------------------------------------------------------|-------|
| A_23_P25559  | -2.2 | 1.5  | 1.4  | 1.0 | ABCC4 | Homo sapiens ATP-binding cassette, sub-family C (CFTR/MRP), member 4 (ABCC4), transcript variant 1, mRNA [NM_005845] | 10257 |
| A_23_P212665 | -1.4 | -3.0 | -1.0 | 1.0 | ABCC5 | Homo sapiens ATP-binding cassette, sub-family C (CFTR/MRP), member 5 (ABCC5), transcript variant 1, mRNA [NM_005688] | 10057 |

|              |       |      |      |      |       |                                                                                                                          |       |
|--------------|-------|------|------|------|-------|--------------------------------------------------------------------------------------------------------------------------|-------|
| A_24_P178503 | -28.7 | -2.0 | -2.1 | -1.9 | ABCC9 | Homo sapiens ATP-binding cassette, sub-family C (CFTR/MRP), member 9 (ABCC9), transcript variant SUR2A, mRNA [NM_005691] | 10060 |
| A_23_P388124 | -1.0  | -4.4 | -1.1 | -1.1 | ABCD2 | Homo sapiens ATP-binding cassette, sub-family D (ALD), member 2 (ABCD2), mRNA [NM_005164]                                | 225   |
| A_24_P221154 | 4.3   | 1.0  | 1.0  | 1.0  | ABCD3 | Homo sapiens ATP-binding cassette, sub-family D (ALD), member 3 (ABCD3), transcript variant 1, mRNA [NM_002858]          | 5825  |

|              |      |      |      |      |       |                                                                                                                  |      |
|--------------|------|------|------|------|-------|------------------------------------------------------------------------------------------------------------------|------|
| A_23_P37327  | -8.7 | -1.1 | -1.1 | -1.1 | ABCD4 | Homo sapiens ATP-binding cassette, sub-family D (ALD), member 4 (ABCD4), transcript variant 1, mRNA [NM_005050]  | 5826 |
| A_23_P41380  | 2.5  | -1.0 | -2.0 | 1.0  | ABCE1 | Homo sapiens ATP-binding cassette, sub-family E (OABP), member 1 (ABCE1), transcript variant 1, mRNA [NM_002940] | 6059 |
| A_32_P108474 | -3.3 | -2.5 | 1.1  | 1.0  | ABCE1 | Homo sapiens ATP-binding cassette, sub-family E (OABP), member 1 (ABCE1), transcript variant 1, mRNA [NM_002940] | 6059 |

|              |     |      |     |      |       |                                                                                                                   |       |
|--------------|-----|------|-----|------|-------|-------------------------------------------------------------------------------------------------------------------|-------|
| A_24_P251688 | 2.3 | -2.1 | 2.0 | -1.4 | ABCF3 | Homo sapiens ATP-binding cassette, sub-family F (GCN20), member 3 (ABCF3), mRNA [NM_018358]                       | 55324 |
| A_23_P166297 | 4.8 | 2.4  | 5.6 | 7.4  | ABCG1 | Homo sapiens ATP-binding cassette, sub-family G (WHITE), member 1 (ABCG1), transcript variant 5, mRNA [NM_207627] | 9619  |
| A_23_P18713  | 5.8 | 6.5  | 7.0 | 1.4  | ABCG2 | Homo sapiens ATP-binding cassette, sub-family G (WHITE), member 2 (ABCG2), mRNA [NM_004827]                       | 9429  |

|              |      |      |      |      |       |                                                                                                                          |       |
|--------------|------|------|------|------|-------|--------------------------------------------------------------------------------------------------------------------------|-------|
| A_24_P355626 | 1.8  | 3.1  | 2.6  | 2.6  | ABCG4 | Homo sapiens ATP-binding cassette, sub-family G (WHITE), member 4 (ABCG4), transcript variant 1, mRNA [NM_022169]        | 64137 |
| A_23_P17242  | -2.8 | 1.1  | 1.0  | -1.6 | ABHD1 | Homo sapiens abhydrolase domain containing 1 (ABHD1), mRNA [NM_032604]                                                   | 84696 |
| A_24_P918739 | -1.1 | -1.3 | -1.8 | -3.0 | ABHD1 | Homo sapiens abhydrolase domain containing 1, mRNA (cDNA clone IMAGE:4812401), with apparent retained intron. [BC028378] | 84696 |

|              |      |      |      |      |        |                                                                                                                                             |       |
|--------------|------|------|------|------|--------|---------------------------------------------------------------------------------------------------------------------------------------------|-------|
| A_24_P308590 | 2.4  | 2.3  | 2.2  | 2.3  | ABHD10 | Homo sapiens abhydrolase domain containing 10 (ABHD10), mRNA [NM_018394]                                                                    | 55347 |
| A_24_P268662 | -1.0 | -1.0 | -1.0 | -4.1 | ABHD10 | Homo sapiens abhydrolase domain containing 10 (ABHD10), mRNA [NM_018394]                                                                    | 55347 |
| A_23_P92213  | -1.4 | -2.7 | -1.4 | 1.3  | ABHD10 | Homo sapiens abhydrolase domain containing 10 (ABHD10), mRNA [NM_018394]                                                                    | 55347 |
| A_23_P8558   | -1.3 | -1.6 | -1.3 | -2.6 | ABHD11 | Homo sapiens abhydrolase domain containing 11 (ABHD11), nuclear gene encoding mitochondrial protein, transcript variant 1, mRNA [NM_148912] | 83451 |

|              |      |      |      |      |         |                                                                                                  |        |
|--------------|------|------|------|------|---------|--------------------------------------------------------------------------------------------------|--------|
| A_24_P61464  | -4.1 | -1.1 | 1.2  | -1.2 | ABHD13  | Homo sapiens abhydrolase domain containing 13 (ABHD13), mRNA [NM_032859]                         | 84945  |
| A_23_P69267  | 1.1  | 2.9  | -1.5 | 2.1  | ABHD14A | Homo sapiens abhydrolase domain containing 14A (ABHD14A), mRNA [NM_015407]                       | 25864  |
| A_23_P155417 | -2.4 | 1.0  | 1.4  | 1.1  | ABHD14B | Homo sapiens abhydrolase domain containing 14B (ABHD14B), transcript variant 1, mRNA [NM_032750] | 84836  |
| A_32_P465065 | 1.4  | 1.1  | -2.3 | 1.5  | ABHD16B | Homo sapiens abhydrolase domain containing 16B (ABHD16B), mRNA [NM_080622]                       | 140701 |



|              |      |      |      |      |       |                                                                                              |        |
|--------------|------|------|------|------|-------|----------------------------------------------------------------------------------------------|--------|
| A_24_P924915 | -1.0 | 3.8  | 1.4  | -1.7 | ABHD2 | Homo sapiens abhydrolase domain containing 2 (ABHD2), transcript variant 1, mRNA [NM_007011] | 11057  |
| A_24_P924920 | 1.3  | 1.3  | 2.3  | -1.0 | ABHD2 | Homo sapiens abhydrolase domain containing 2 (ABHD2), transcript variant 1, mRNA [NM_007011] | 11057  |
| A_23_P140591 | 1.8  | -2.0 | -1.2 | -1.3 | ABHD2 | Homo sapiens abhydrolase domain containing 2 (ABHD2), transcript variant 1, mRNA [NM_007011] | 11057  |
| A_23_P305759 | 3.5  | -1.7 | 1.1  | 1.0  | ABHD3 | Homo sapiens abhydrolase domain containing 3 (ABHD3), mRNA [NM_138340]                       | 171586 |

|              |      |     |     |      |       |                                                                                                            |       |
|--------------|------|-----|-----|------|-------|------------------------------------------------------------------------------------------------------------|-------|
| A_23_P50857  | 4.9  | 6.6 | 7.3 | 3.8  | ABHD8 | Homo sapiens abhydrolyase domain containing 8 (ABHD8), mRNA [NM_024527]                                    | 79575 |
| A_23_P79692  | 2.1  | 4.7 | 2.6 | -1.3 | ABI2  | Homo sapiens abl-interactor 2 (ABI2), mRNA [NM_005759]                                                     | 10152 |
| A_23_P141429 | -1.4 | 2.0 | 2.2 | 1.8  | ABI3  | Homo sapiens ABI family, member 3 (ABI3), transcript variant 1, mRNA [NM_016428]                           | 51225 |
| A_24_P282416 | 2.6  | 2.5 | 1.8 | 4.3  | ABL1  | Homo sapiens c-abl oncogene 1, non-receptor tyrosine kinase (ABL1), transcript variant b, mRNA [NM_007313] | 25    |

|              |     |     |     |      |      |                                                                                                                                                                    |    |
|--------------|-----|-----|-----|------|------|--------------------------------------------------------------------------------------------------------------------------------------------------------------------|----|
| A_32_P139894 | 3.0 | 2.8 | 2.2 | 3.0  | ABL2 | Homo sapiens v-abl Abelson murine leukemia viral oncogene homolog 2 (ABL2), transcript variant b, mRNA [NM_007314]                                                 | 27 |
| A_23_P112646 | 1.5 | 2.1 | 1.3 | -1.1 | ABO  | Homo sapiens ABO blood group (transferase A, alpha 1-3-N-acetylgalactosaminyl transferase; transferase B, alpha 1-3-galactosyltransferase) (ABO), mRNA [NM_020469] | 28 |
| A_23_P503182 | 1.5 | 2.4 | 1.0 | 1.0  | ABR  | Homo sapiens active BCR-related gene (ABR), transcript variant 1, mRNA [NM_021962]                                                                                 | 29 |

|              |      |     |     |      |       |                                                                                                                  |        |
|--------------|------|-----|-----|------|-------|------------------------------------------------------------------------------------------------------------------|--------|
| A_23_P313482 | 2.1  | 2.9 | 2.2 | 2.1  | ABRA  | Homo sapiens actin-binding Rho activating protein (ABRA), mRNA [NM_139166]                                       | 137735 |
| A_24_P200297 | 1.5  | 3.0 | 1.9 | -1.0 | ABTB1 | Homo sapiens ankyrin repeat and BTB (POZ) domain containing 1 (ABTB1), transcript variant 2, mRNA [NM_172027]    | 80325  |
| A_23_P89799  | -1.3 | 1.3 | 1.1 | 2.3  | ACAA2 | Homo sapiens acetyl-CoA acyltransferase 2 (ACAA2), nuclear gene encoding mitochondrial protein, mRNA [NM_006111] | 10449  |

|              |      |      |      |      |        |                                                                                                        |       |
|--------------|------|------|------|------|--------|--------------------------------------------------------------------------------------------------------|-------|
| A_23_P141434 | -3.7 | -1.1 | -4.0 | -1.5 | ACACA  | Homo sapiens acetyl-CoA carboxylase alpha (ACACA), transcript variant 2, mRNA [NM_198839]              | 31    |
| A_23_P25348  | -1.3 | 1.1  | -3.9 | -7.6 | ACAD10 | Homo sapiens acyl-CoA dehydrogenase family, member 10 (ACAD10), transcript variant 2, mRNA [NM_025247] | 80724 |
| A_24_P227450 | 2.5  | -1.2 | -1.2 | 2.9  | ACAD10 | Homo sapiens acyl-CoA dehydrogenase family, member 10 (ACAD10), transcript variant 2, mRNA [NM_025247] | 80724 |

|             |      |      |     |      |        |                                                                                                                             |       |
|-------------|------|------|-----|------|--------|-----------------------------------------------------------------------------------------------------------------------------|-------|
| A_24_P8284  | 2.6  | -1.2 | 2.4 | 2.4  | ACAD10 | Homo sapiens acyl-CoA dehydrogenase family, member 10 (ACAD10), transcript variant 2, mRNA [NM_025247]                      | 80724 |
| A_23_P47426 | -1.3 | -2.1 | 1.1 | -1.9 | ACAD8  | Homo sapiens acyl-CoA dehydrogenase family, member 8 (ACAD8), nuclear gene encoding mitochondrial protein, mRNA [NM_014384] | 27034 |

|              |      |     |      |      |       |                                                                                                                                                   |       |
|--------------|------|-----|------|------|-------|---------------------------------------------------------------------------------------------------------------------------------------------------|-------|
| A_23_P132405 | -2.3 | 1.0 | -1.1 | -1.0 | ACAD9 | Homo sapiens acyl-CoA dehydrogenase family, member 9 (ACAD9), nuclear gene encoding mitochondrial protein, transcript variant 1, mRNA [NM_014049] | 28976 |
| A_24_P191656 | 3.3  | 5.3 | -1.1 | 1.8  | ACAD9 | Homo sapiens acyl-CoA dehydrogenase family, member 9 (ACAD9), nuclear gene encoding mitochondrial protein, transcript variant 1, mRNA [NM_014049] | 28976 |

|              |      |      |      |     |       |                                                                                                                                                              |    |
|--------------|------|------|------|-----|-------|--------------------------------------------------------------------------------------------------------------------------------------------------------------|----|
| A_24_P234242 | -2.2 | -1.5 | -1.6 | 1.4 | ACADL | Homo sapiens acyl-CoA dehydrogenase, long chain (ACADL), nuclear gene encoding mitochondrial protein, mRNA [NM_001608]                                       | 33 |
| A_23_P96761  | 1.1  | -2.0 | 1.1  | 1.1 | ACADM | Homo sapiens acyl-CoA dehydrogenase, C-4 to C-12 straight chain (ACADM), nuclear gene encoding mitochondrial protein, transcript variant 1, mRNA [NM_000016] | 34 |



|              |      |     |      |      |        |                                                                                                                                    |    |
|--------------|------|-----|------|------|--------|------------------------------------------------------------------------------------------------------------------------------------|----|
| A_23_P65022  | 1.9  | 3.7 | 3.7  | 3.7  | ACADS  | Homo sapiens acyl-CoA dehydrogenase, C-2 to C-3 short chain (ACADS), nuclear gene encoding mitochondrial protein, mRNA [NM_000017] | 35 |
| A_24_P189516 | -3.2 | 1.0 | -1.0 | -1.6 | ACADSB | Homo sapiens acyl-CoA dehydrogenase, short/branched chain (ACADSB), nuclear gene encoding mitochondrial protein, mRNA [NM_001609]  | 36 |

|              |      |      |      |     |        |                                                                                                                                   |        |
|--------------|------|------|------|-----|--------|-----------------------------------------------------------------------------------------------------------------------------------|--------|
| A_32_P31945  | -1.0 | -1.0 | -1.1 | 2.3 | ACADSB | Homo sapiens acyl-CoA dehydrogenase, short/branched chain (ACADSB), nuclear gene encoding mitochondrial protein, mRNA [NM_001609] | 36     |
| A_24_P942002 | -6.7 | 1.0  | -1.8 | 1.1 | ACAP2  | Homo sapiens ArfGAP with coiled-coil, ankyrin repeat and PH domains 2 (ACAP2), mRNA [NM_012287]                                   | 23527  |
| A_23_P23630  | 1.4  | 2.5  | 3.5  | 2.0 | ACAP3  | Homo sapiens ArfGAP with coiled-coil, ankyrin repeat and PH domains 3 (ACAP3), mRNA [NM_030649]                                   | 116983 |

|              |      |      |      |      |       |                                                                                                                    |        |
|--------------|------|------|------|------|-------|--------------------------------------------------------------------------------------------------------------------|--------|
| A_23_P12231  | -1.2 | -2.7 | -1.0 | -3.5 | ACAP3 | Homo sapiens ArfGAP with coiled-coil, ankyrin repeat and PH domains 3 (ACAP3), mRNA [NM_030649]                    | 116983 |
| A_24_P203678 | 1.2  | 1.5  | 2.2  | 1.1  | ACAT1 | Homo sapiens acetyl-CoA acetyltransferase 1 (ACAT1), nuclear gene encoding mitochondrial protein, mRNA [NM_000019] | 38     |
| A_24_P171182 | 2.9  | 2.8  | -1.5 | 2.8  | ACBD3 | Homo sapiens acyl-CoA binding domain containing 3 (ACBD3), mRNA [NM_022735]                                        | 64746  |

|              |     |      |      |      |       |                                                                                                   |       |
|--------------|-----|------|------|------|-------|---------------------------------------------------------------------------------------------------|-------|
| A_24_P366122 | 2.8 | 1.8  | -1.6 | -1.0 | ACBD4 | Homo sapiens acyl-CoA binding domain containing 4 (ACBD4), transcript variant 2, mRNA [NM_024722] | 79777 |
| A_24_P175563 | 1.1 | 1.0  | -6.6 | 1.0  | ACBD5 | Homo sapiens acyl-CoA binding domain containing 5 (ACBD5), transcript variant 1, mRNA [NM_145698] | 91452 |
| A_23_P52127  | 1.0 | -1.0 | -1.0 | -5.0 | ACBD6 | Homo sapiens acyl-CoA binding domain containing 6 (ACBD6), mRNA [NM_032360]                       | 84320 |

|              |      |      |      |      |       |                                                                                                                 |       |
|--------------|------|------|------|------|-------|-----------------------------------------------------------------------------------------------------------------|-------|
| A_32_P159612 | -1.3 | -1.1 | 1.3  | -2.8 | ACCN1 | Homo sapiens amiloride-sensitive cation channel 1, neuronal (ACCN1), transcript variant MDEG2, mRNA [NM_183377] | 40    |
| A_23_P93658  | -3.1 | -3.2 | -3.2 | -3.3 | ACCN3 | Homo sapiens amiloride-sensitive cation channel 3 (ACCN3), transcript variant 3, mRNA [NM_020322]               | 9311  |
| A_24_P405375 | -1.1 | 1.3  | 2.1  | 1.1  | ACCN4 | Homo sapiens amiloride-sensitive cation channel 4, pituitary (ACCN4), transcript variant 1, mRNA [NM_018674]    | 55515 |

|             |      |      |      |      |      |                                                                                                                                              |       |
|-------------|------|------|------|------|------|----------------------------------------------------------------------------------------------------------------------------------------------|-------|
| A_23_P24586 | -5.0 | 1.0  | -1.0 | -1.0 | ACCS | Homo sapiens 1-aminocyclopropane-1-carboxylate synthase homolog (Arabidopsis)(non-functional) (ACCS), transcript variant 1, mRNA [NM_032592] | 84680 |
| A_23_P26375 | 1.4  | 4.0  | -1.4 | -1.8 | ACD  | Homo sapiens adrenocortical dysplasia homolog (mouse) (ACD), transcript variant 2, mRNA [NM_022914]                                          | 65057 |
| A_23_P38235 | -1.0 | -1.4 | -1.1 | -2.2 | ACE  | Homo sapiens angiotensin I converting enzyme (peptidyl-dipeptidase A) 1 (ACE), transcript variant 1, mRNA [NM_000789]                        | 1636  |

|              |      |      |      |      |        |                                                                                                         |        |
|--------------|------|------|------|------|--------|---------------------------------------------------------------------------------------------------------|--------|
| A_23_P14389  | -3.3 | -2.5 | -5.9 | -3.3 | ACIN1  | Homo sapiens apoptotic chromatin condensation inducer 1 (ACIN1), transcript variant 1, mRNA [NM_014977] | 22985  |
| A_23_P376727 | 5.0  | 4.5  | 4.5  | 4.6  | ACMSD  | Homo sapiens aminocarboxymuconate semialdehyde decarboxylase (ACMSD), mRNA [NM_138326]                  | 130013 |
| A_23_P9416   | -1.1 | -2.5 | -1.3 | -1.4 | ACO1   | Homo sapiens aconitase 1, soluble (ACO1), mRNA [NM_002197]                                              | 48     |
| A_24_P945165 | -1.1 | -3.6 | -1.2 | -1.1 | ACOT11 | acyl-CoA thioesterase 11 [Source:HGNC Symbol;Acc:18156] [ENST00000371316]                               | 26027  |

|              |      |      |      |      |        |                                                                                                                                      |       |
|--------------|------|------|------|------|--------|--------------------------------------------------------------------------------------------------------------------------------------|-------|
| A_23_P31116  | 2.4  | -1.5 | -1.4 | 1.4  | ACOT13 | Homo sapiens acyl-CoA thioesterase 13 (ACOT13), transcript variant 1, mRNA [NM_018473]                                               | 55856 |
| A_23_P143218 | 2.8  | 1.7  | 1.1  | -1.6 | ACOT8  | Homo sapiens acyl-CoA thioesterase 8 (ACOT8), mRNA [NM_005469]                                                                       | 10005 |
| A_23_P125624 | 2.5  | 1.5  | 1.5  | 1.7  | ACOT9  | Homo sapiens acyl-CoA thioesterase 9 (ACOT9), nuclear gene encoding mitochondrial protein, transcript variant 1, mRNA [NM_001037171] | 23597 |
| A_23_P10182  | -2.9 | 1.3  | 1.2  | -5.7 | ACOX2  | Homo sapiens acyl-CoA oxidase 2, branched chain (ACOX2), mRNA [NM_003500]                                                            | 8309  |



|              |       |      |      |      |      |                                                                                            |      |
|--------------|-------|------|------|------|------|--------------------------------------------------------------------------------------------|------|
| A_24_P354451 | -12.7 | -1.2 | -1.4 | -1.4 | ACO3 | Homo sapiens acyl-CoA oxidase 3, pristanoyl (ACO3), transcript variant 1, mRNA [NM_003501] | 8310 |
| A_23_P316381 | 1.6   | 1.1  | -2.2 | -1.0 | ACO3 | Homo sapiens acyl-CoA oxidase 3, pristanoyl (ACO3), transcript variant 1, mRNA [NM_003501] | 8310 |
| A_23_P138776 | -2.0  | 1.1  | 1.5  | -3.2 | ACP2 | Homo sapiens acid phosphatase 2, lysosomal (ACP2), transcript variant 1, mRNA [NM_001610]  | 53   |
| A_23_P138782 | -1.2  | 2.5  | 1.8  | 1.0  | ACP2 | Homo sapiens acid phosphatase 2, lysosomal (ACP2), transcript variant 1, mRNA [NM_001610]  | 53   |

|              |      |      |      |      |      |                                                                                                    |       |
|--------------|------|------|------|------|------|----------------------------------------------------------------------------------------------------|-------|
| A_23_P142075 | -7.5 | -1.5 | -1.6 | -2.5 | ACP5 | Homo sapiens acid phosphatase 5, tartrate resistant (ACP5), transcript variant 4, mRNA [NM_001611] | 54    |
| A_23_P160240 | 1.0  | -1.0 | -1.1 | -2.3 | ACP6 | Homo sapiens acid phosphatase 6, lysophosphatidic (ACP6), mRNA [NM_016361]                         | 51205 |
| A_24_P37589  | 2.1  | -1.6 | 1.0  | 1.2  | ACPP | Homo sapiens acid phosphatase, prostate (ACPP), transcript variant 1, mRNA [NM_001099]             | 55    |
| A_23_P330419 | 5.3  | 1.9  | 1.1  | -1.8 | ACPT | Homo sapiens acid phosphatase, testicular (ACPT), mRNA [NM_033068]                                 | 93650 |

|              |     |      |      |     |        |                                                                                                             |       |
|--------------|-----|------|------|-----|--------|-------------------------------------------------------------------------------------------------------------|-------|
| A_32_P191262 | 1.4 | 2.0  | -1.6 | 1.2 | ACR    | Homo sapiens acrosin (ACR), mRNA [NM_001097]                                                                | 49    |
| A_23_P40734  | 1.2 | 1.1  | -2.1 | 1.2 | ACR    | Homo sapiens acrosin (ACR), mRNA [NM_001097]                                                                | 49    |
| A_23_P151120 | 1.0 | -5.3 | -1.1 | 2.0 | ACRBP  | Homo sapiens acrosin binding protein (ACRBP), mRNA [NM_032489]                                              | 84519 |
| A_23_P171237 | 1.0 | -1.0 | -3.1 | 1.7 | ACRC   | Homo sapiens acidic repeat containing (ACRC), mRNA [NM_052957]                                              | 93953 |
| A_23_P54488  | 1.3 | -6.4 | 1.0  | 2.0 | ACSBG1 | Homo sapiens acyl-CoA synthetase bubblegum family member 1 (ACSBG1), transcript variant 1, mRNA [NM_015162] | 23205 |

|              |     |      |      |     |        |                                                                                                             |       |
|--------------|-----|------|------|-----|--------|-------------------------------------------------------------------------------------------------------------|-------|
| A_23_P131050 | 1.3 | 1.8  | -1.0 | 2.3 | ACSBG2 | Homo sapiens acyl-CoA synthetase bubblegum family member 2 (ACSBG2), mRNA [NM_030924]                       | 81616 |
| A_23_P4190   | 3.4 | -1.6 | -1.3 | 1.1 | ACSF2  | Homo sapiens acyl-CoA synthetase family member 2 (ACSF2), mRNA [NM_025149]                                  | 80221 |
| A_23_P110212 | 2.2 | 2.1  | 2.9  | 1.7 | ACSL1  | Homo sapiens acyl-CoA synthetase long-chain family member 1 (ACSL1), mRNA [NM_001995]                       | 2180  |
| A_23_P217564 | 1.3 | 2.4  | 1.3  | 1.0 | ACSL4  | Homo sapiens acyl-CoA synthetase long-chain family member 4 (ACSL4), transcript variant 1, mRNA [NM_004458] | 2182  |

|              |      |      |      |      |        |                                                                                                                                                              |        |
|--------------|------|------|------|------|--------|--------------------------------------------------------------------------------------------------------------------------------------------------------------|--------|
| A_24_P941526 | -1.2 | -1.3 | -2.0 | -2.7 | ACSL6  | Homo sapiens acyl-CoA synthetase long-chain family member 6 (ACSL6), transcript variant 2, mRNA [NM_001009185]                                               | 23305  |
| A_23_P415806 | 1.1  | -3.6 | -1.3 | 1.1  | ACSL6  | acyl-CoA synthetase long-chain family member 6 [Source:HGNC Symbol;Acc:16496] [ENST00000489047]                                                              | 23305  |
| A_23_P66328  | -7.9 | 1.7  | -2.0 | -4.7 | ACSM2B | Homo sapiens acyl-CoA synthetase medium-chain family member 2B (ACSM2B), nuclear gene encoding mitochondrial protein, transcript variant 1, mRNA [NM_182617] | 348158 |

|              |      |      |      |       |       |                                                                                                                                     |       |
|--------------|------|------|------|-------|-------|-------------------------------------------------------------------------------------------------------------------------------------|-------|
| A_24_P367776 | -1.4 | -1.4 | -1.4 | -13.2 | ACSM5 | Homo sapiens acyl-CoA synthetase medium-chain family member 5, mRNA (cDNA clone IMAGE:4069865), complete cds. [BC016703]            | 54988 |
| A_23_P120594 | 6.8  | 1.5  | 1.5  | 2.1   | ACSS1 | Homo sapiens acyl-CoA synthetase short-chain family member 1 (ACSS1), nuclear gene encoding mitochondrial protein, mRNA [NM_032501] | 84532 |
| A_24_P940831 | 2.6  | 2.6  | 2.5  | 2.6   | ACSS1 | Homo sapiens mRNA for FLJ00013 protein, partial cds. [AK024424]                                                                     | 84532 |

|              |      |      |       |      |       |                                                                                                              |       |
|--------------|------|------|-------|------|-------|--------------------------------------------------------------------------------------------------------------|-------|
| A_24_P156295 | -4.2 | 1.0  | -1.0  | 1.1  | ACSS2 | Homo sapiens acyl-CoA synthetase short-chain family member 2 (ACSS2), transcript variant 1, mRNA [NM_018677] | 55902 |
| A_23_P339119 | 1.1  | -3.0 | 1.5   | 1.0  | ACSS3 | Homo sapiens acyl-CoA synthetase short-chain family member 3 (ACSS3), mRNA [NM_024560]                       | 79611 |
| A_23_P1102   | -5.1 | 2.0  | -15.3 | -1.1 | ACTA1 | Homo sapiens actin, alpha 1, skeletal muscle (ACTA1), mRNA [NM_001100]                                       | 58    |

|              |      |      |      |      |        |                                                                                                   |        |
|--------------|------|------|------|------|--------|---------------------------------------------------------------------------------------------------|--------|
| A_23_P150053 | 1.6  | 2.0  | -1.2 | 1.1  | ACTA2  | Homo sapiens actin, alpha 2, smooth muscle, aorta (ACTA2), transcript variant 2, mRNA [NM_001613] | 59     |
| A_24_P6903   | -1.4 | 1.1  | -2.2 | -1.0 | ACTBL2 | Homo sapiens actin, beta-like 2 (ACTBL2), mRNA [NM_001017992]                                     | 345651 |
| A_23_P205894 | -1.0 | -2.6 | -1.2 | -1.2 | ACTC1  | Homo sapiens actin, alpha, cardiac muscle 1 (ACTC1), mRNA [NM_005159]                             | 70     |
| A_24_P121535 | 1.8  | 2.1  | 1.4  | 1.4  | ACTC1  | Homo sapiens actin, alpha, cardiac muscle 1 (ACTC1), mRNA [NM_005159]                             | 70     |



|              |      |      |      |      |        |                                                                                                     |       |
|--------------|------|------|------|------|--------|-----------------------------------------------------------------------------------------------------|-------|
| A_23_P39955  | -3.0 | -1.6 | -2.1 | -1.7 | ACTG2  | Homo sapiens actin, gamma 2, smooth muscle, enteric (ACTG2), transcript variant 1, mRNA [NM_001615] | 72    |
| A_23_P31984  | -1.0 | -1.2 | 1.7  | 2.1  | ACTL7A | Homo sapiens actin-like 7A (ACTL7A), mRNA [NM_006687]                                               | 10881 |
| A_23_P9186   | 3.5  | 1.9  | 2.0  | 1.4  | ACTL7B | Homo sapiens actin-like 7B (ACTL7B), mRNA [NM_006686]                                               | 10880 |
| A_24_P107695 | 2.6  | 2.1  | 1.5  | 2.8  | ACTN1  | Homo sapiens actinin, alpha 1 (ACTN1), transcript variant 2, mRNA [NM_001102]                       | 87    |

|              |      |     |      |     |        |                                                                                                         |       |
|--------------|------|-----|------|-----|--------|---------------------------------------------------------------------------------------------------------|-------|
| A_23_P105957 | -1.1 | 2.4 | 1.2  | 1.6 | ACTN1  | Homo sapiens actinin, alpha 1 (ACTN1), transcript variant 2, mRNA [NM_001102]                           | 87    |
| A_23_P315241 | -6.8 | 1.2 | 1.6  | 1.3 | ACTN4  | Homo sapiens actinin, alpha 4 (ACTN4), mRNA [NM_004924]                                                 | 81    |
| A_24_P261326 | 2.0  | 2.6 | 2.1  | 2.1 | ACTR1A | Homo sapiens ARP1 actin-related protein 1 homolog A, cetractin alpha (yeast) (ACTR1A), mRNA [NM_005736] | 10121 |
| A_23_P28279  | 2.3  | 1.1 | -1.1 | 1.3 | ACTR1B | Homo sapiens ARP1 actin-related protein 1 homolog B, cetractin beta (yeast) (ACTR1B), mRNA [NM_005735]  | 10120 |

|              |      |      |      |      |       |                                                                                                              |       |
|--------------|------|------|------|------|-------|--------------------------------------------------------------------------------------------------------------|-------|
| A_24_P276947 | 2.3  | 2.2  | 1.7  | -1.4 | ACTR2 | Homo sapiens ARP2 actin-related protein 2 homolog (yeast) (ACTR2), transcript variant 1, mRNA [NM_001005386] | 10097 |
| A_24_P105771 | -3.0 | -1.0 | -1.8 | 1.3  | ACTR3 | Homo sapiens ARP3 actin-related protein 3 homolog (yeast) (ACTR3), mRNA [NM_005721]                          | 10096 |
| A_23_P108785 | -1.1 | -4.7 | -2.5 | 1.5  | ACTR3 | Homo sapiens ARP3 actin-related protein 3 homolog (yeast) (ACTR3), mRNA [NM_005721]                          | 10096 |

|              |      |      |      |      |        |                                                                                                                 |        |
|--------------|------|------|------|------|--------|-----------------------------------------------------------------------------------------------------------------|--------|
| A_24_P303594 | -1.6 | -9.8 | -1.5 | -1.8 | ACTR3B | Homo sapiens ARP3 actin-related protein 3 homolog B (yeast) (ACTR3B), transcript variant 2, mRNA [NM_001040135] | 57180  |
| A_23_P123193 | 1.7  | 1.7  | 2.1  | 1.7  | ACTR3B | Homo sapiens ARP3 actin-related protein 3 homolog B (yeast) (ACTR3B), transcript variant 1, mRNA [NM_020445]    | 57180  |
| A_24_P76635  | -2.0 | -3.7 | -4.3 | -1.0 | ACTR3C | Homo sapiens ARP3 actin-related protein 3 homolog C (yeast) (ACTR3C), transcript variant 1, mRNA [NM_001164458] | 653857 |

|              |      |      |      |       |        |                                                                                         |        |
|--------------|------|------|------|-------|--------|-----------------------------------------------------------------------------------------|--------|
| A_23_P165952 | 1.1  | -2.8 | -1.0 | 1.0   | ACTR5  | Homo sapiens ARP5 actin-related protein 5 homolog (yeast) (ACTR5), mRNA [NM_024855]     | 79913  |
| A_24_P131697 | -5.6 | 1.2  | -2.6 | -6.7  | ACTR8  | Homo sapiens ARP8 actin-related protein 8 homolog (yeast) (ACTR8), mRNA [NM_022899]     | 93973  |
| A_23_P147311 | 3.0  | 1.4  | 3.1  | -40.2 | ACTRT1 | Homo sapiens actin-related protein T1 (ACTRT1), mRNA [NM_138289]                        | 139741 |
| A_23_P79221  | -2.1 | -2.1 | 1.4  | 1.4   | ACVR1  | Homo sapiens activin A receptor, type I (ACVR1), transcript variant 1, mRNA [NM_001105] | 90     |

|              |      |      |      |      |        |                                                                                           |        |
|--------------|------|------|------|------|--------|-------------------------------------------------------------------------------------------|--------|
| A_23_P99036  | 1.3  | 1.6  | 1.5  | -7.7 | ACVR1B | Homo sapiens activin A receptor, type IB (ACVR1B), transcript variant 1, mRNA [NM_004302] | 91     |
| A_24_P341897 | -1.3 | 2.1  | -2.0 | 1.5  | ACVR1B | Homo sapiens activin A receptor, type IB (ACVR1B), transcript variant 1, mRNA [NM_004302] | 91     |
| A_32_P190944 | 2.6  | -1.1 | 4.0  | 2.8  | ACVR1C | Homo sapiens activin A receptor, type IC (ACVR1C), transcript variant 1, mRNA [NM_145259] | 130399 |
| A_23_P109950 | -2.1 | -1.6 | -1.9 | 1.4  | ACVR2B | Homo sapiens activin A receptor, type IIB (ACVR2B), mRNA [NM_001106]                      | 93     |

|              |     |      |      |      |        |                                                                                                           |    |
|--------------|-----|------|------|------|--------|-----------------------------------------------------------------------------------------------------------|----|
| A_24_P324783 | 1.1 | -2.6 | -1.1 | 1.0  | ACVRL1 | Homo sapiens activin A receptor type II-like 1 (ACVRL1), transcript variant 1, mRNA [NM_000020]           | 94 |
| A_23_P163143 | 1.2 | -1.5 | -3.3 | 1.1  | ACYP1  | Homo sapiens acylphosphatase 1, erythrocyte (common) type (ACYP1), transcript variant 2, mRNA [NM_203488] | 97 |
| A_23_P159424 | 1.4 | 2.7  | 1.3  | -1.0 | ACYP2  | H.sapiens mRNA for acylphosphatase, muscle type (MT) isoenzyme . [X84195]                                 | 98 |
| A_23_P256988 | 1.1 | -2.8 | 1.0  | 1.1  | ACYP2  | Homo sapiens acylphosphatase 2, muscle type (ACYP2), mRNA [NM_138448]                                     | 98 |

|              |      |      |      |      |        |                                                                                                |        |
|--------------|------|------|------|------|--------|------------------------------------------------------------------------------------------------|--------|
| A_23_P210482 | 1.5  | -1.1 | -3.5 | -1.5 | ADA    | Homo sapiens adenosine deaminase (ADA), mRNA [NM_000022]                                       | 100    |
| A_32_P221694 | 1.0  | -4.3 | -1.1 | -1.0 | ADAL   | Homo sapiens adenosine deaminase-like (ADAL), transcript variant 1, mRNA [NM_001159280]        | 161823 |
| A_23_P207345 | 1.1  | -2.3 | -2.2 | 1.1  | ADAM11 | Homo sapiens ADAM metalloproteinase domain 11 (ADAM11), mRNA [NM_002390]                       | 4185   |
| A_23_P350512 | -1.0 | -2.1 | -1.0 | -1.0 | ADAM12 | Homo sapiens ADAM metalloproteinase domain 12 (ADAM12), transcript variant 2, mRNA [NM_021641] | 8038   |



|              |     |      |      |     |        |                                                                                                |      |
|--------------|-----|------|------|-----|--------|------------------------------------------------------------------------------------------------|------|
| A_32_P129621 | 1.0 | 1.5  | -2.9 | 1.0 | ADAM17 | Homo sapiens ADAM metalloproteinase domain 17 (ADAM17), mRNA [NM_003183]                       | 6868 |
| A_24_P157053 | 2.0 | 2.0  | 2.0  | 1.1 | ADAM17 | ADAM metalloproteinase domain 17 [Source:HGNC Symbol;Acc:195] [ENST00000310823]                | 6868 |
| A_23_P72527  | 7.1 | 9.2  | 9.0  | 8.8 | ADAM18 | Homo sapiens ADAM metalloproteinase domain 18 (ADAM18), transcript variant 1, mRNA [NM_014237] | 8749 |
| A_23_P136832 | 1.1 | -2.3 | 1.1  | 1.0 | ADAM2  | Homo sapiens ADAM metalloproteinase domain 2 (ADAM2), mRNA [NM_001464]                         | 2515 |

|              |      |      |      |      |        |                                                                                                |       |
|--------------|------|------|------|------|--------|------------------------------------------------------------------------------------------------|-------|
| A_23_P215625 | 1.0  | -6.3 | 1.1  | -1.6 | ADAM22 | Homo sapiens ADAM metalloproteinase domain 22 (ADAM22), transcript variant 1, mRNA [NM_021723] | 53616 |
| A_24_P243741 | -1.0 | -1.1 | -5.2 | -1.0 | ADAM22 | Homo sapiens ADAM metalloproteinase domain 22 (ADAM22), transcript variant 5, mRNA [NM_021721] | 53616 |
| A_23_P21758  | -4.9 | 1.7  | 1.2  | 1.0  | ADAM28 | Homo sapiens ADAM metalloproteinase domain 28 (ADAM28), transcript variant 1, mRNA [NM_014265] | 10863 |

|              |      |      |      |      |        |                                                                                                |        |
|--------------|------|------|------|------|--------|------------------------------------------------------------------------------------------------|--------|
| A_23_P44665  | 6.3  | 6.1  | 2.8  | 5.3  | ADAM32 | Homo sapiens ADAM metalloproteinase domain 32 (ADAM32), mRNA [NM_145004]                       | 203102 |
| A_23_P502343 | 5.9  | -1.2 | 2.7  | 1.7  | ADAM33 | Homo sapiens ADAM metalloproteinase domain 33 (ADAM33), transcript variant 1, mRNA [NM_025220] | 80332  |
| A_24_P230026 | -3.0 | -1.8 | -2.0 | -1.9 | ADAM5P | Homo sapiens ADAM metalloproteinase domain 5, pseudogene (ADAM5P), non-coding RNA [NR_001448]  | 255926 |

|              |      |     |      |      |          |                                                                                                     |       |
|--------------|------|-----|------|------|----------|-----------------------------------------------------------------------------------------------------|-------|
| A_24_P592260 | 3.7  | 1.6 | -1.6 | 3.2  | ADAM6    | Homo sapiens ADAM metalloproteinase domain 6 (pseudogene) (ADAM6), non-coding RNA [NR_002224]       | 8755  |
| A_23_P256425 | -2.2 | 1.3 | 1.3  | -2.7 | ADAMDEC1 | Homo sapiens ADAM-like, decysin 1 (ADAMDEC1), transcript variant 1, mRNA [NM_014479]                | 27299 |
| A_23_P211039 | 1.1  | 2.0 | 1.9  | 1.1  | ADAMTS1  | Homo sapiens ADAM metalloproteinase with thrombospondin type 1 motif, 1 (ADAMTS1), mRNA [NM_006988] | 9510  |

|              |      |      |      |      |          |                                                                                                                             |       |
|--------------|------|------|------|------|----------|-----------------------------------------------------------------------------------------------------------------------------|-------|
| A_23_P44648  | -2.8 | 1.1  | 3.4  | 1.1  | ADAMTS12 | Homo sapiens ADAM metalloproteinase with thrombospondin type 1 motif, 12 (ADAMTS12), mRNA [NM_030955]                       | 81792 |
| A_23_P393645 | -1.3 | -1.5 | -1.4 | -2.0 | ADAMTS13 | Homo sapiens ADAM metalloproteinase with thrombospondin type 1 motif, 13 (ADAMTS13), transcript variant 1, mRNA [NM_139025] | 11093 |

|              |      |      |      |      |          |                                                                                                                             |       |
|--------------|------|------|------|------|----------|-----------------------------------------------------------------------------------------------------------------------------|-------|
| A_24_P172304 | -2.2 | -2.2 | -1.8 | -2.1 | ADAMTS13 | Homo sapiens ADAM metalloproteinase with thrombospondin type 1 motif, 13 (ADAMTS13), transcript variant 2, mRNA [NM_139027] | 11093 |
| A_24_P923832 | 1.8  | -1.7 | -1.7 | -3.1 | ADAMTS13 | Homo sapiens ADAM metalloproteinase with thrombospondin type 1 motif, 13 (ADAMTS13), transcript variant 2, mRNA [NM_139027] | 11093 |

|              |      |     |      |      |          |                                                                                                                             |        |
|--------------|------|-----|------|------|----------|-----------------------------------------------------------------------------------------------------------------------------|--------|
| A_23_P202558 | 1.1  | 1.2 | -5.7 | -1.5 | ADAMTS14 | Homo sapiens ADAM metalloproteinase with thrombospondin type 1 motif, 14 (ADAMTS14), transcript variant 1, mRNA [NM_139155] | 140766 |
| A_24_P275073 | -7.4 | 1.2 | 1.1  | 1.8  | ADAMTS14 | Homo sapiens ADAM metalloproteinase with thrombospondin type 1 motif, 14 (ADAMTS14), transcript variant 1, mRNA [NM_139155] | 140766 |

|              |     |     |       |      |          |                                                                                                       |        |
|--------------|-----|-----|-------|------|----------|-------------------------------------------------------------------------------------------------------|--------|
| A_23_P52749  | 1.0 | 1.1 | -11.3 | -1.2 | ADAMTS15 | Homo sapiens ADAM metalloproteinase with thrombospondin type 1 motif, 15 (ADAMTS15), mRNA [NM_139055] | 170689 |
| A_24_P69084  | 5.8 | 2.7 | 5.1   | 4.1  | ADAMTS16 | Homo sapiens ADAM metalloproteinase with thrombospondin type 1 motif, 16 (ADAMTS16), mRNA [NM_139056] | 170690 |
| A_23_P112916 | 4.2 | 3.0 | 1.4   | 2.0  | ADAMTS17 | Homo sapiens ADAM metalloproteinase with thrombospondin type 1 motif, 17 (ADAMTS17), mRNA [NM_139057] | 170691 |



|              |      |      |     |      |          |                                                                                                                           |        |
|--------------|------|------|-----|------|----------|---------------------------------------------------------------------------------------------------------------------------|--------|
| A_23_P15004  | -1.0 | -1.1 | 1.1 | -2.7 | ADAMTS18 | Homo sapiens ADAM metalloproteinase with thrombospondin type 1 motif, 18 (ADAMTS18), mRNA [NM_199355]                     | 170692 |
| A_23_P321307 | 1.0  | -1.5 | 2.3 | 2.0  | ADAMTS2  | Homo sapiens ADAM metalloproteinase with thrombospondin type 1 motif, 2 (ADAMTS2), transcript variant 2, mRNA [NM_021599] | 9509   |
| A_23_P144521 | -3.3 | -1.5 | 1.2 | -1.7 | ADAMTS3  | Homo sapiens ADAM metalloproteinase with thrombospondin type 1 motif, 3 (ADAMTS3), mRNA [NM_014243]                       | 9508   |

|              |      |      |      |      |             |                                                                                                     |           |
|--------------|------|------|------|------|-------------|-----------------------------------------------------------------------------------------------------|-----------|
| A_23_P40415  | 1.0  | 1.1  | -8.0 | -1.1 | ADAMTS5     | Homo sapiens ADAM metalloproteinase with thrombospondin type 1 motif, 5 (ADAMTS5), mRNA [NM_007038] | 11096     |
| A_23_P37632  | 1.1  | 2.0  | 1.0  | 1.0  | ADAMTS7     | Homo sapiens zinc metalloproteinase ADAMTS7 (ADAMTS7) mRNA, complete cds. [AF140675]                | 11173     |
| A_24_P756494 | 1.0  | -2.3 | -4.5 | -4.0 | ADAMTS9-AS1 | Homo sapiens cDNA FLJ25194 fis, clone REC04095. [AK057923]                                          | 100507098 |
| A_23_P348304 | -1.1 | -2.0 | -4.4 | -1.2 | ADAMTSL1    | ADAMTS-like 1 [Source:HGNC Symbol;Acc:14632] [ENST00000380566]                                      | 92949     |

|              |      |      |      |      |          |                                                                               |        |
|--------------|------|------|------|------|----------|-------------------------------------------------------------------------------|--------|
| A_23_P20697  | 1.5  | 2.2  | 1.6  | 1.9  | ADAMTSL2 | Homo sapiens ADAMTS-like 2 (ADAMTSL2), transcript variant 1, mRNA [NM_014694] | 9719   |
| A_23_P115011 | -1.0 | -1.0 | -2.8 | -1.0 | ADAMTSL4 | Homo sapiens ADAMTS-like 4 (ADAMTSL4), transcript variant 1, mRNA [NM_019032] | 54507  |
| A_24_P315821 | -1.4 | -1.1 | -1.3 | -3.0 | ADAMTSL5 | Homo sapiens ADAMTS-like 5 (ADAMTSL5), mRNA [NM_213604]                       | 339366 |
| A_24_P22939  | 2.1  | -2.9 | -3.0 | -3.8 | ADAMTSL5 | Homo sapiens ADAMTS-like 5 (ADAMTSL5), mRNA [NM_213604]                       | 339366 |
| A_23_P145865 | 1.4  | -6.6 | -1.1 | -2.0 | ADAP1    | Homo sapiens ArfGAP with dual PH domains 1 (ADAP1), mRNA [NM_006869]          | 11033  |

|              |     |       |      |      |        |                                                                                                     |       |
|--------------|-----|-------|------|------|--------|-----------------------------------------------------------------------------------------------------|-------|
| A_23_P49816  | 1.2 | -19.0 | -3.9 | -1.2 | ADAP2  | Homo sapiens ArfGAP with dual PH domains 2 (ADAP2), mRNA [NM_018404]                                | 55803 |
| A_23_P361336 | 4.2 | 4.1   | 4.1  | 4.2  | ADARB1 | Homo sapiens adenosine deaminase, RNA-specific, B1 (ADARB1), transcript variant 2, mRNA [NM_015833] | 104   |
| A_24_P936556 | 1.3 | -3.7  | -1.2 | -1.1 | ADARB1 | adenosine deaminase, RNA-specific, B1 [Source:HGNC Symbol;Acc:226] [ENST00000460734]                | 104   |
| A_24_P48139  | 1.1 | -1.2  | -4.4 | -2.3 | ADAT1  | Homo sapiens adenosine deaminase, tRNA-specific 1 (ADAT1), transcript variant 1, mRNA [NM_012091]   | 23536 |

|              |      |      |      |       |       |                                                                                              |        |
|--------------|------|------|------|-------|-------|----------------------------------------------------------------------------------------------|--------|
| A_23_P134014 | -1.0 | -1.1 | -5.6 | -1.1  | ADAT2 | Homo sapiens adenosine deaminase , tRNA-specific 2 (ADAT2), mRNA [NM_182503]                 | 134637 |
| A_24_P186204 | 1.0  | -1.0 | -2.2 | -1.1  | ADAT2 | Homo sapiens adenosine deaminase , tRNA-specific 2 (ADAT2), mRNA [NM_182503]                 | 134637 |
| A_24_P82848  | 1.7  | -1.3 | 1.5  | -33.1 | ADAT3 | Homo sapiens adenosine deaminase , tRNA-specific 3 (ADAT3), mRNA [NM_138422]                 | 113179 |
| A_23_P25945  | 1.2  | 1.3  | 3.7  | 2.3   | ADCK1 | Homo sapiens aarF domain containing kinase 1 (ADCK1), transcript variant 1, mRNA [NM_020421] | 57143  |

|              |      |      |      |      |       |                                                                                  |        |
|--------------|------|------|------|------|-------|----------------------------------------------------------------------------------|--------|
| A_32_P405973 | -4.5 | 1.1  | -1.2 | -1.1 | ADCY2 | Homo sapiens adenylate cyclase 2 (brain) (ADCY2), mRNA [NM_020546]               | 108    |
| A_23_P381261 | -1.2 | -1.4 | -1.2 | -5.1 | ADCY4 | Homo sapiens adenylate cyclase 4 (ADCY4), transcript variant 2, mRNA [NM_139247] | 196883 |
| A_23_P169993 | 1.3  | 1.3  | 1.2  | -2.5 | ADCY8 | Homo sapiens adenylate cyclase 8 (brain) (ADCY8), mRNA [NM_001115]               | 114    |
| A_23_P49443  | 2.5  | 3.4  | 2.8  | 4.3  | ADCY9 | Homo sapiens adenylate cyclase 9 (ADCY9), mRNA [NM_001116]                       | 115    |
| A_24_P935103 | -1.0 | -1.1 | -4.5 | -1.1 | ADCY9 | Homo sapiens adenylate cyclase 9 (ADCY9), mRNA [NM_001116]                       | 115    |

|              |      |      |      |      |         |                                                                                                                       |     |
|--------------|------|------|------|------|---------|-----------------------------------------------------------------------------------------------------------------------|-----|
| A_24_P335781 | 1.5  | 2.8  | -1.1 | -1.6 | ADCYAP1 | Homo sapiens adenylate cyclase activating polypeptide 1 (pituitary) (ADCYAP1), transcript variant 2, mRNA [NM_001117] | 116 |
| A_24_P109272 | 1.0  | -2.3 | -1.0 | -1.0 | ADD1    | adducin 1 (alpha) [Source:HGNC Symbol;Acc:243] [ENST00000513762]                                                      | 118 |
| A_24_P117866 | -2.7 | 1.1  | -4.7 | -1.7 | ADD1    | Homo sapiens adducin 1 (alpha) (ADD1), transcript variant 1, mRNA [NM_001119]                                         | 118 |
| A_23_P209856 | -2.2 | -1.9 | -1.2 | -2.7 | ADD2    | Homo sapiens adducin 2 (beta) (ADD2), transcript variant 4, mRNA [NM_017488]                                          | 119 |

|              |      |      |      |     |       |                                                                                                     |     |
|--------------|------|------|------|-----|-------|-----------------------------------------------------------------------------------------------------|-----|
| A_23_P202435 | -2.3 | -1.4 | -6.4 | 1.5 | ADD3  | Homo sapiens adducin 3 (gamma) (ADD3), transcript variant 1, mRNA [NM_016824]                       | 120 |
| A_24_P940469 | -3.0 | 2.1  | 2.1  | 2.0 | ADH1B | alcohol dehydrogenase 1B (class I), beta polypeptide [Source:HGNC Symbol;Acc:250] [ENST00000305046] | 125 |
| A_23_P81158  | -1.0 | 1.6  | -1.6 | 2.5 | ADH1C | Homo sapiens alcohol dehydrogenase 1C (class I), gamma polypeptide (ADH1C), mRNA [NM_000669]        | 126 |



|              |      |      |      |      |      |                                                                                                                         |     |
|--------------|------|------|------|------|------|-------------------------------------------------------------------------------------------------------------------------|-----|
| A_32_P198399 | -1.2 | 2.2  | -2.2 | 1.9  | ADH5 | Homo sapiens alcohol dehydrogenase 5 (class III), chi polypeptide (ADH5), mRNA [NM_000671]                              | 128 |
| A_24_P25550  | -1.5 | 1.6  | -2.4 | 1.5  | ADH6 | Homo sapiens alcohol dehydrogenase 6 (class V) (ADH6), transcript variant 1, mRNA [NM_001102470]                        | 130 |
| A_23_P92562  | 1.9  | -2.3 | -1.0 | -1.0 | ADH7 | Homo sapiens alcohol dehydrogenase 7 (class IV), mu or sigma polypeptide (ADH7), transcript variant 2, mRNA [NM_000673] | 131 |

|              |      |      |      |      |         |                                                                                       |        |
|--------------|------|------|------|------|---------|---------------------------------------------------------------------------------------|--------|
| A_32_P52911  | -2.1 | 1.1  | -1.7 | -1.0 | ADI1    | Homo sapiens acireductone dioxygenase 1 (ADI1), mRNA [NM_018269]                      | 55256  |
| A_32_P423691 | 1.1  | 1.1  | -2.4 | 1.1  | ADIG    | Homo sapiens adipogenin (ADIG), mRNA [NM_001018082]                                   | 149685 |
| A_23_P46627  | -1.8 | -1.0 | -2.1 | -1.1 | ADIPOR1 | Homo sapiens adiponectin receptor 1 (ADIPOR1), transcript variant 1, mRNA [NM_015999] | 51094  |
| A_24_P13376  | 1.4  | 1.6  | 1.2  | 2.4  | ADIPOR2 | Homo sapiens adiponectin receptor 2 (ADIPOR2), mRNA [NM_024551]                       | 79602  |
| A_23_P112596 | 2.3  | -1.1 | -1.8 | 2.2  | ADK     | Homo sapiens adenosine kinase (ADK), transcript variant 1, mRNA [NM_001123]           | 132    |

|              |      |      |      |      |         |                                                                                                        |       |
|--------------|------|------|------|------|---------|--------------------------------------------------------------------------------------------------------|-------|
| A_23_P254179 | 1.4  | -2.2 | 1.9  | -1.0 | ADNP    | Homo sapiens activity-dependent neuroprotector homeobox (ADNP), transcript variant 1, mRNA [NM_015339] | 23394 |
| A_23_P202345 | 15.8 | 15.8 | 14.9 | 2.8  | ADO     | Homo sapiens 2-aminoethanethiol (cysteamine) dioxygenase (ADO), mRNA [NM_032804]                       | 84890 |
| A_23_P74299  | -3.4 | -1.3 | -1.2 | -1.3 | ADORA1  | Homo sapiens adenosine A1 receptor (ADORA1), transcript variant 1, mRNA [NM_000674]                    | 134   |
| A_23_P109436 | 2.2  | 1.7  | -1.1 | 1.1  | ADORA2A | Homo sapiens adenosine A2a receptor (ADORA2A), mRNA [NM_000675]                                        | 135   |

|              |      |      |      |      |         |                                                                                            |        |
|--------------|------|------|------|------|---------|--------------------------------------------------------------------------------------------|--------|
| A_24_P237270 | 1.8  | 1.8  | 2.8  | 1.0  | ADORA2A | Homo sapiens adenosine A2a receptor (ADORA2A), mRNA [NM_000675]                            | 135    |
| A_23_P126540 | 2.0  | 2.1  | 2.1  | 1.1  | ADORA3  | Homo sapiens adenosine A3 receptor (ADORA3), transcript variant 1, mRNA [NM_020683]        | 140    |
| A_23_P14716  | 1.9  | -1.2 | 2.1  | -1.1 | ADPGK   | Homo sapiens ADP-dependent glucokinase (ADPGK), transcript variant 1, mRNA [NM_031284]     | 83440  |
| A_23_P371145 | -3.8 | -3.0 | -1.7 | -2.1 | ADPRHL1 | Homo sapiens ADP-ribosylhydrolase like 1 (ADPRHL1), transcript variant 1, mRNA [NM_138430] | 113622 |

|              |      |      |      |      |         |                                                                                                                   |       |
|--------------|------|------|------|------|---------|-------------------------------------------------------------------------------------------------------------------|-------|
| A_23_P34568  | -1.3 | -2.8 | -1.9 | -2.1 | ADPRHL2 | Homo sapiens ADP-ribosylhydrolase like 2 (ADPRHL2), nuclear gene encoding mitochondrial protein, mRNA [NM_017825] | 54936 |
| A_23_P8938   | 1.8  | 1.7  | 3.0  | -1.1 | ADRA1A  | Homo sapiens adrenergic, alpha-1A-, receptor (ADRA1A), transcript variant 4, mRNA [NM_033304]                     | 148   |
| A_23_P378926 | 1.8  | 1.8  | 3.6  | 1.0  | ADRA2B  | Homo sapiens adrenergic, alpha-2B-, receptor (ADRA2B), mRNA [NM_000682]                                           | 151   |
| A_23_P168993 | -4.6 | -1.3 | -1.5 | -2.6 | ADRB3   | Homo sapiens adrenergic, beta-3-, receptor (ADRB3), mRNA [NM_000025]                                              | 155   |

|              |      |      |      |      |       |                                                                                             |       |
|--------------|------|------|------|------|-------|---------------------------------------------------------------------------------------------|-------|
| A_23_P68665  | 2.2  | 1.8  | 1.1  | 1.6  | ADRM1 | Homo sapiens adhesion regulating molecule 1 (ADRM1), transcript variant 1, mRNA [NM_007002] | 11047 |
| A_23_P859    | -1.0 | 1.4  | 2.2  | 1.3  | ADSS  | Homo sapiens adenylosuccinate synthase (ADSS), mRNA [NM_001126]                             | 159   |
| A_23_P157299 | -1.1 | -1.1 | -3.8 | -1.1 | AEBP1 | Homo sapiens AE binding protein 1 (AEBP1), mRNA [NM_001129]                                 | 165   |
| A_23_P145916 | 1.8  | -1.3 | 1.3  | -3.1 | AEBP1 | Homo sapiens AE binding protein 1 (AEBP1), mRNA [NM_001129]                                 | 165   |

|              |      |      |       |     |       |                                                                                                     |        |
|--------------|------|------|-------|-----|-------|-----------------------------------------------------------------------------------------------------|--------|
| A_23_P116913 | -2.6 | 4.1  | -1.7  | 1.1 | AEBP2 | Homo sapiens AE binding protein 2 (AEBP2), transcript variant 1, mRNA [NM_153207]                   | 121536 |
| A_23_P206077 | 1.0  | -6.3 | 1.0   | 1.1 | AEN   | Homo sapiens apoptosis enhancing nuclease (AEN), mRNA [NM_022767]                                   | 64782  |
| A_23_P341312 | 1.4  | 1.6  | -30.8 | 1.4 | AES   | Homo sapiens amino-terminal enhancer of split (AES), transcript variant 1, mRNA [NM_198969]         | 166    |
| A_23_P72387  | 1.3  | -1.1 | 1.1   | 2.4 | AFAP1 | Homo sapiens actin filament associated protein 1 (AFAP1), transcript variant a, mRNA [NM_001134647] | 60312  |

|              |      |      |      |      |           |                                                                                                           |       |
|--------------|------|------|------|------|-----------|-----------------------------------------------------------------------------------------------------------|-------|
| A_32_P178092 | -3.3 | 1.0  | -1.0 | 1.0  | AFAP1-AS1 | Homo sapiens AFAP1 antisense RNA 1 (non-protein coding) (AFAP1-AS1), antisense RNA [NR_026892]            | 84740 |
| A_24_P33770  | -1.2 | -1.2 | -2.6 | -1.2 | AFAP1L2   | Homo sapiens actin filament associated protein 1-like 2 (AFAP1L2), transcript variant 2, mRNA [NM_032550] | 84632 |
| A_23_P29897  | -2.6 | 1.3  | -1.2 | -1.0 | AFF1      | Homo sapiens AF4/FMR2 family, member 1 (AFF1), transcript variant 2, mRNA [NM_005935]                     | 4299  |



|              |     |      |      |      |      |                                                                                       |       |
|--------------|-----|------|------|------|------|---------------------------------------------------------------------------------------|-------|
| A_24_P414332 | 1.0 | -1.7 | -2.6 | -1.1 | AFF1 | Homo sapiens AF4/FMR2 family, member 1 (AFF1), transcript variant 2, mRNA [NM_005935] | 4299  |
| A_24_P942636 | 5.6 | 1.4  | 5.6  | 5.7  | AFF4 | Homo sapiens AF4/FMR2 family, member 4 (AFF4), mRNA [NM_014423]                       | 27125 |
| A_24_P8318   | 5.0 | -2.2 | 1.5  | 3.5  | AFF4 | Homo sapiens AF4/FMR2 family, member 4 (AFF4), mRNA [NM_014423]                       | 27125 |

|              |      |      |      |      |         |                                                                                                                                       |       |
|--------------|------|------|------|------|---------|---------------------------------------------------------------------------------------------------------------------------------------|-------|
| A_23_P355289 | -2.9 | -2.4 | -3.9 | -6.6 | AFG3L1P | Homo sapiens AFG3 ATPase family gene 3-like 1 (S. cerevisiae), pseudogene (AFG3L1P), transcript variant 1, non-coding RNA [NR_003226] | 172   |
| A_32_P117338 | -2.1 | 1.0  | -5.7 | 1.4  | AFG3L2  | Homo sapiens AFG3 ATPase family gene 3-like 2 (S. cerevisiae) (AFG3L2), nuclear gene encoding mitochondrial protein, mRNA [NM_006796] | 10939 |

|              |      |      |      |      |       |                                                                                        |        |
|--------------|------|------|------|------|-------|----------------------------------------------------------------------------------------|--------|
| A_24_P867342 | 1.3  | 2.0  | 1.3  | 1.6  | AFMID | Homo sapiens arylformamidase (AFMID), transcript variant 3, non-coding RNA [NR_027083] | 125061 |
| A_24_P122862 | -3.0 | 1.0  | -1.0 | 1.1  | AFTPH | Homo sapiens aftiphilin (AFTPH), transcript variant 2, mRNA [NM_017657]                | 54812  |
| A_23_P428382 | -1.5 | 1.3  | 1.6  | 2.6  | AFTPH | Homo sapiens aftiphilin (AFTPH), transcript variant 1, mRNA [NM_203437]                | 54812  |
| A_23_P7099   | 5.3  | -1.0 | -1.1 | -1.1 | AGA   | Homo sapiens aspartylglucosaminidase (AGA), transcript variant 1, mRNA [NM_000027]     | 175    |

|              |      |       |      |      |        |                                                                                                                           |        |
|--------------|------|-------|------|------|--------|---------------------------------------------------------------------------------------------------------------------------|--------|
| A_32_P55161  | 2.4  | 1.9   | -1.2 | 2.6  | AGAP1  | Homo sapiens ArfGAP with GTPase domain, ankyrin repeat and PH domain 1 (AGAP1), transcript variant 1, mRNA [NM_001037131] | 116987 |
| A_32_P124493 | -2.6 | -3.7  | -6.2 | -1.3 | AGAP10 | PREDICTED: Homo sapiens ArfGAP with GTPase domain, ankyrin repeat and PH domain 10 (AGAP10), mRNA [XM_001714786]          | 728127 |
| A_24_P244495 | -2.8 | -35.5 | -1.0 | 1.0  | AGAP2  | Homo sapiens ArfGAP with GTPase domain, ankyrin repeat and PH domain 2 (AGAP2), transcript variant 1, mRNA [NM_001122772] | 116986 |

|              |      |     |      |      |       |                                                                                                                           |        |
|--------------|------|-----|------|------|-------|---------------------------------------------------------------------------------------------------------------------------|--------|
| A_24_P333364 | 2.6  | 1.5 | 1.2  | 1.0  | AGAP3 | Homo sapiens ArfGAP with GTPase domain, ankyrin repeat and PH domain 3 (AGAP3), transcript variant 2, mRNA [NM_001042535] | 116988 |
| A_32_P211363 | 1.1  | 1.0 | -1.0 | -2.9 | AGAP8 | Homo sapiens ArfGAP with GTPase domain, ankyrin repeat and PH domain 8 (AGAP8), mRNA [NM_001077686]                       | 728404 |
| A_32_P8881   | -1.3 | 1.1 | -1.5 | -3.6 | AGAP8 | Homo sapiens ArfGAP with GTPase domain, ankyrin repeat and PH domain 8 (AGAP8), mRNA [NM_001077686]                       | 728404 |

|              |      |      |      |       |       |                                                                                                |        |
|--------------|------|------|------|-------|-------|------------------------------------------------------------------------------------------------|--------|
| A_32_P167705 | 1.0  | -2.4 | -1.0 | -1.0  | AGBL2 | Homo sapiens ATP/GTP binding protein-like 2 (AGBL2), mRNA [NM_024783]                          | 79841  |
| A_32_P82623  | -1.3 | -2.3 | -3.3 | -2.3  | AGBL3 | Homo sapiens ATP/GTP binding protein-like 3 (AGBL3), mRNA [NM_178563]                          | 340351 |
| A_23_P154466 | 1.6  | 2.5  | 2.3  | 1.4   | AGBL5 | Homo sapiens ATP/GTP binding protein-like 5 (AGBL5), transcript variant 3, mRNA [NM_001035507] | 60509  |
| A_23_P311640 | -1.0 | -1.1 | 1.0  | -23.7 | AGFG2 | Homo sapiens ArfGAP with FG repeats 2 (AGFG2), mRNA [NM_006076]                                | 3268   |

|              |      |      |      |      |        |                                                                                                                                                |       |
|--------------|------|------|------|------|--------|------------------------------------------------------------------------------------------------------------------------------------------------|-------|
| A_23_P103720 | -1.2 | -1.2 | -7.1 | -1.3 | AGMAT  | Homo sapiens agmatine ureohydrolase (agmatinase) (AGMAT), mRNA [NM_024758]                                                                     | 79814 |
| A_23_P218743 | -2.1 | 1.0  | 1.0  | 1.2  | AGPAT3 | Homo sapiens 1-acylglycerol-3-phosphate O-acyltransferase 3 (AGPAT3), transcript variant 1, mRNA [NM_020132]                                   | 56894 |
| A_23_P329452 | -2.4 | 1.2  | 1.2  | -2.3 | AGPAT4 | 1-acylglycerol-3-phosphate O-acyltransferase 4 (lysophosphatidic acid acyltransferase, delta) [Source:HGNC Symbol;Acc:20885] [ENST00000436279] | 56895 |

|             |      |      |      |      |        |                                                                                                                                         |        |
|-------------|------|------|------|------|--------|-----------------------------------------------------------------------------------------------------------------------------------------|--------|
| A_24_P29876 | -2.6 | -3.7 | -1.8 | -3.2 | AGPAT5 | Homo sapiens 1-acylglycerol-3-phosphate O-acyltransferase 5 (lysophosphatidic acid acyltransferase, epsilon) (AGPAT5), mRNA [NM_018361] | 55326  |
| A_23_P82839 | 1.2  | -2.7 | -1.8 | -1.0 | AGPAT6 | Homo sapiens 1-acylglycerol-3-phosphate O-acyltransferase 6 (lysophosphatidic acid acyltransferase, zeta) (AGPAT6), mRNA [NM_178819]    | 137964 |
| A_23_P69810 | -1.4 | -1.4 | -1.5 | -2.2 | AGPAT9 | Homo sapiens 1-acylglycerol-3-phosphate O-acyltransferase 9 (AGPAT9), mRNA [NM_032717]                                                  | 84803  |



|              |      |      |      |      |      |                                                                                    |        |
|--------------|------|------|------|------|------|------------------------------------------------------------------------------------|--------|
| A_24_P902100 | 3.3  | 1.5  | 2.9  | 2.3  | AGPS | Homo sapiens alkylglycerone phosphate synthase (AGPS), mRNA [NM_003659]            | 8540   |
| A_23_P42811  | 1.0  | -6.6 | -1.0 | -1.4 | AGR3 | Homo sapiens anterior gradient homolog 3 (Xenopus laevis) (AGR3), mRNA [NM_176813] | 155465 |
| A_24_P358462 | 3.1  | 2.9  | 1.4  | 2.0  | AGRN | Homo sapiens agrin (AGRN), mRNA [NM_198576]                                        | 375790 |
| A_23_P502320 | -1.1 | 3.4  | -1.3 | 1.4  | AGRP | Homo sapiens agouti related protein homolog (mouse) (AGRP), mRNA [NM_001138]       | 181    |

|              |      |      |      |      |         |                                                                                                             |       |
|--------------|------|------|------|------|---------|-------------------------------------------------------------------------------------------------------------|-------|
| A_23_P169278 | 1.1  | -2.1 | -1.1 | -1.0 | AGTPBP1 | Homo sapiens ATP/GTP binding protein 1 (AGTPBP1), mRNA [NM_015239]                                          | 23287 |
| A_24_P350832 | 9.0  | 9.5  | 8.8  | 5.1  | AGTPBP1 | Homo sapiens mRNA for hypothetical protein, clone C91-V61. [AJ437018]                                       | 23287 |
| A_23_P158596 | 1.0  | 1.0  | -1.1 | -2.6 | AGTRAP  | Homo sapiens angiotensin II receptor-associated protein (AGTRAP), transcript variant 4, mRNA [NM_001040196] | 57085 |
| A_23_P83590  | -1.5 | 1.3  | 2.3  | -2.5 | AGXT    | Homo sapiens alanine-glyoxylate aminotransferase (AGXT), mRNA [NM_000030]                                   | 189   |

|              |      |       |      |      |         |                                                                                                             |       |
|--------------|------|-------|------|------|---------|-------------------------------------------------------------------------------------------------------------|-------|
| A_23_P257231 | -1.2 | -14.0 | 1.1  | -1.5 | AGXT2L1 | Homo sapiens alanine-glyoxylate aminotransferase 2-like 1 (AGXT2L1), transcript variant 1, mRNA [NM_031279] | 64850 |
| A_23_P41888  | -1.0 | -2.2  | -1.1 | -1.0 | AGXT2L2 | Homo sapiens alanine-glyoxylate aminotransferase 2-like 2 (AGXT2L2), mRNA [NM_153373]                       | 85007 |
| A_23_P63584  | -3.0 | -2.5  | 1.8  | 2.2  | AHCTF1  | Homo sapiens AT hook containing transcription factor 1 (AHCTF1), mRNA [NM_015446]                           | 25909 |
| A_23_P17575  | -3.3 | -1.0  | -1.1 | 1.0  | AHCY    | Homo sapiens adenosylhomocysteinase (AHCY), transcript variant 1, mRNA [NM_000687]                          | 191   |

|              |      |      |      |      |       |                                                                                               |       |
|--------------|------|------|------|------|-------|-----------------------------------------------------------------------------------------------|-------|
| A_24_P57367  | 2.0  | 3.2  | 3.0  | 3.2  | AHCY  | Homo sapiens adenosylhomocysteinase (AHCY), transcript variant 1, mRNA [NM_000687]            | 191   |
| A_24_P213710 | 1.8  | 4.4  | 6.5  | 2.8  | AHI1  | Homo sapiens Abelson helper integration site 1 (AHI1), transcript variant 2, mRNA [NM_017651] | 54806 |
| A_24_P38143  | -1.5 | -1.7 | -1.8 | -8.7 | AHI1  | Homo sapiens Abelson helper integration site 1 (AHI1), transcript variant 2, mRNA [NM_017651] | 54806 |
| A_24_P912684 | -2.6 | -1.3 | -1.3 | -1.4 | AHNAK | Homo sapiens AHNAK nucleoprotein (AHNAK), transcript variant 1, mRNA [NM_001620]              | 79026 |

|              |      |      |      |      |        |                                                                                                 |        |
|--------------|------|------|------|------|--------|-------------------------------------------------------------------------------------------------|--------|
| A_23_P426636 | 1.4  | 2.3  | -1.8 | -1.3 | AHNAK  | Homo sapiens AHNAK nucleoprotein (AHNAK), transcript variant 1, mRNA [NM_001620]                | 79026  |
| A_24_P178618 | 1.1  | -1.2 | -2.1 | 1.1  | AHNAK2 | Homo sapiens AHNAK nucleoprotein 2 (AHNAK2), mRNA [NM_138420]                                   | 113146 |
| A_23_P215566 | -4.1 | 1.5  | 1.5  | 1.0  | AHR    | Homo sapiens aryl hydrocarbon receptor (AHR), mRNA [NM_001621]                                  | 196    |
| A_23_P344400 | -2.7 | 1.0  | -1.0 | 1.0  | AHRR   | Homo sapiens aryl-hydrocarbon receptor repressor (AHRR), transcript variant 1, mRNA [NM_020731] | 57491  |

|              |      |      |      |      |       |                                                                                                             |        |
|--------------|------|------|------|------|-------|-------------------------------------------------------------------------------------------------------------|--------|
| A_23_P372467 | 3.4  | 1.0  | -4.1 | 1.6  | AHSA2 | Homo sapiens AHA1, activator of heat shock 90kDa protein ATPase homolog 2 (yeast) (AHSA2), mRNA [NM_152392] | 130872 |
| A_23_P135486 | 19.1 | 20.9 | 18.6 | 12.4 | AHSP  | Homo sapiens alpha hemoglobin stabilizing protein (AHSP), mRNA [NM_016633]                                  | 51327  |
| A_23_P392384 | 1.0  | -6.7 | -6.7 | 1.0  | AIF1L | Homo sapiens allograft inflammatory factor 1-like (AIF1L), transcript variant 3, mRNA [NM_001185095]        | 83543  |

|              |      |      |      |      |       |                                                                                                                     |       |
|--------------|------|------|------|------|-------|---------------------------------------------------------------------------------------------------------------------|-------|
| A_23_P138567 | -1.0 | 2.0  | 1.1  | 1.3  | AIFM2 | Homo sapiens apoptosis-inducing factor, mitochondrial-associated, 2 (AIFM2), transcript variant 2, mRNA [NM_032797] | 84883 |
| A_23_P93431  | -6.4 | 1.1  | 1.3  | 1.0  | AIG1  | Homo sapiens androgen-induced 1 (AIG1), mRNA [NM_016108]                                                            | 51390 |
| A_23_P360329 | 1.5  | -1.2 | -2.0 | -2.2 | AIM1L | Homo sapiens absent in melanoma 1-like (AIM1L), mRNA [NM_001039775]                                                 | 55057 |

|              |      |      |      |      |       |                                                                                                                                      |      |
|--------------|------|------|------|------|-------|--------------------------------------------------------------------------------------------------------------------------------------|------|
| A_24_P354523 | -2.7 | -5.4 | -1.8 | -6.5 | AIMP1 | Homo sapiens aminoacyl tRNA synthetase complex-interacting multifunctional protein 1 (AIMP1), transcript variant 1, mRNA [NM_004757] | 9255 |
| A_23_P121686 | -1.1 | -1.1 | -1.0 | -2.3 | AIMP1 | Homo sapiens aminoacyl tRNA synthetase complex-interacting multifunctional protein 1 (AIMP1), transcript variant 1, mRNA [NM_004757] | 9255 |
| A_23_P75380  | 4.2  | 4.5  | 1.6  | 3.6  | AIP   | Homo sapiens aryl hydrocarbon receptor interacting protein (AIP), mRNA [NM_003977]                                                   | 9049 |



|              |      |      |      |      |       |                                                                                                                   |       |
|--------------|------|------|------|------|-------|-------------------------------------------------------------------------------------------------------------------|-------|
| A_23_P100935 | -2.9 | -1.0 | -1.6 | -1.0 | AIPL1 | Homo sapiens aryl hydrocarbon receptor interacting protein-like 1 (AIPL1), transcript variant 1, mRNA [NM_014336] | 23746 |
| A_24_P254355 | -1.0 | 2.0  | 1.8  | 1.3  | AIRE  | Homo sapiens autoimmune regulator (AIRE), transcript variant AIRE-2, mRNA [NM_000658]                             | 326   |
| A_23_P68740  | 3.3  | 2.9  | -3.2 | 1.6  | AIRE  | Homo sapiens autoimmune regulator (AIRE), transcript variant AIRE-2, mRNA [NM_000658]                             | 326   |
| A_24_P278192 | 1.1  | -1.0 | -2.8 | -1.7 | AK1   | Homo sapiens adenylate kinase 1 (AK1), mRNA [NM_000476]                                                           | 203   |

|              |     |      |      |      |     |                                                                                                                            |     |
|--------------|-----|------|------|------|-----|----------------------------------------------------------------------------------------------------------------------------|-----|
| A_23_P217088 | 2.4 | -3.0 | 1.2  | 1.4  | AK1 | Homo sapiens adenylate kinase 1 (AK1), mRNA [NM_000476]                                                                    | 203 |
| A_32_P207360 | 1.1 | -3.2 | -1.3 | -2.0 | AK2 | Homo sapiens adenylate kinase 2 (AK2), nuclear gene encoding mitochondrial protein, transcript variant 2, mRNA [NM_013411] | 204 |
| A_24_P500891 | 1.0 | 1.4  | -1.1 | -2.3 | AK2 | Homo sapiens adenylate kinase 2 (AK2), nuclear gene encoding mitochondrial protein, transcript variant 2, mRNA [NM_013411] | 204 |

|              |       |      |      |      |     |                                                                                                                               |       |
|--------------|-------|------|------|------|-----|-------------------------------------------------------------------------------------------------------------------------------|-------|
| A_24_P247106 | -17.6 | -2.3 | -2.6 | -5.2 | AK3 | Homo sapiens adenylate kinase 3 (AK3), nuclear gene encoding mitochondrial protein, transcript variant 1, mRNA [NM_016282]    | 50808 |
| A_32_P108655 | -1.1  | 1.0  | -2.0 | 1.1  | AK4 | Homo sapiens adenylate kinase 4 (AK4), nuclear gene encoding mitochondrial protein, transcript variant 5, mRNA [NM_001005353] | 205   |
| A_23_P200015 | 1.3   | -1.0 | 1.4  | -2.3 | AK5 | Homo sapiens adenylate kinase 5 (AK5), transcript variant 1, mRNA [NM_174858]                                                 | 26289 |

|              |      |      |      |      |        |                                                                                                 |        |
|--------------|------|------|------|------|--------|-------------------------------------------------------------------------------------------------|--------|
| A_24_P931097 | -6.0 | 1.1  | 1.0  | -5.9 | AK8    | Homo sapiens cDNA FLJ36014 fis, clone TESTI2016101. [AK093333]                                  | 158067 |
| A_23_P83200  | 1.7  | 2.8  | 2.9  | 3.1  | AK8    | Homo sapiens adenylate kinase 8 (AK8), mRNA [NM_152572]                                         | 158067 |
| A_23_P111311 | 1.0  | -2.5 | -1.4 | 1.0  | AKAP12 | Homo sapiens A kinase (PRKA) anchor protein 12 (AKAP12), transcript variant 2, mRNA [NM_144497] | 9590   |
| A_32_P152437 | -2.2 | 4.3  | 2.3  | 3.1  | AKAP12 | Homo sapiens A kinase (PRKA) anchor protein 12 (AKAP12), transcript variant 1, mRNA [NM_005100] | 9590   |

|              |      |      |      |      |        |                                                                                                  |       |
|--------------|------|------|------|------|--------|--------------------------------------------------------------------------------------------------|-------|
| A_24_P155761 | -3.3 | -3.4 | -3.2 | -1.2 | AKAP13 | Homo sapiens A kinase (PRKA) anchor protein 13 (AKAP13), transcript variant 1, mRNA [NM_006738]  | 11214 |
| A_23_P359043 | -2.9 | -1.1 | -1.1 | -1.1 | AKAP2  | Homo sapiens A kinase (PRKA) anchor protein 2 (AKAP2), transcript variant 1, mRNA [NM_001004065] | 11217 |
| A_23_P14035  | 1.6  | 2.6  | 2.5  | 2.6  | AKAP3  | Homo sapiens A kinase (PRKA) anchor protein 3 (AKAP3), mRNA [NM_006422]                          | 10566 |
| A_23_P106103 | 2.3  | -1.1 | -1.3 | -1.2 | AKAP5  | Homo sapiens A kinase (PRKA) anchor protein 5 (AKAP5), mRNA [NM_004857]                          | 9495  |

|              |      |      |      |      |        |                                                                                                    |       |
|--------------|------|------|------|------|--------|----------------------------------------------------------------------------------------------------|-------|
| A_23_P14343  | 2.0  | 2.0  | 3.6  | 1.2  | AKAP6  | Homo sapiens A kinase (PRKA) anchor protein 6 (AKAP6), mRNA [NM_004274]                            | 9472  |
| A_24_P934594 | -5.4 | 1.3  | -2.4 | -2.3 | AKAP8L | Homo sapiens mRNA; cDNA DKFZp434L0650 (from clone DKFZp434L0650). [AL133576]                       | 26993 |
| A_23_P153767 | 3.8  | 3.7  | 3.8  | 4.2  | AKAP8L | Homo sapiens A kinase (PRKA) anchor protein 8-like (AKAP8L), mRNA [NM_014371]                      | 26993 |
| A_24_P357809 | -1.3 | -1.4 | -1.5 | -3.0 | AKIP1  | Homo sapiens A kinase (PRKA) interacting protein 1 (AKIP1), transcript variant 1, mRNA [NM_020642] | 56672 |

|              |      |      |      |      |         |                                                                                                                                                                |        |
|--------------|------|------|------|------|---------|----------------------------------------------------------------------------------------------------------------------------------------------------------------|--------|
| A_23_P337292 | -1.3 | -1.3 | -1.9 | -2.3 | AKNAD1  | AKNA domain containing 1 [Source:HGNC Symbol;Acc:28398] [ENST00000472781]                                                                                      | 254268 |
| A_24_P129341 | -7.7 | 1.1  | 1.0  | -1.0 | AKR1B10 | Homo sapiens aldo-keto reductase family 1, member B10 (aldose reductase) (AKR1B10), mRNA [NM_020299]                                                           | 57016  |
| A_24_P152968 | -2.3 | 1.1  | -1.0 | -1.0 | AKR1C1  | Homo sapiens aldo-keto reductase family 1, member C1 (dihydrodiol dehydrogenase 1; 20-alpha (3-alpha)-hydroxysteroid dehydrogenase) (AKR1C1), mRNA [NM_001353] | 1645   |

|              |      |      |     |       |        |                                                                                                                                                                                   |      |
|--------------|------|------|-----|-------|--------|-----------------------------------------------------------------------------------------------------------------------------------------------------------------------------------|------|
| A_24_P312578 | -1.8 | -1.3 | 1.4 | -14.1 | AKR1C1 | aldo-keto reductase family 1, member C1 (dihydrodiol dehydrogenase 1; 20-alpha (3-alpha)-hydroxysteroid dehydrogenase) [Source:HGNC Symbol;Acc:384] [ENST00000434459]             | 1645 |
| A_23_P149926 | 1.8  | 1.9  | 2.5 | 1.0   | AKR1C4 | Homo sapiens aldoketo reductase family 1, member C4 (chlordecone reductase; 3-alpha hydroxysteroid dehydrogenase, type I; dihydrodiol dehydrogenase 4) (AKR1C4), mRNA [NM_001818] | 1109 |



|              |     |      |      |     |          |                                                                                                                |        |
|--------------|-----|------|------|-----|----------|----------------------------------------------------------------------------------------------------------------|--------|
| A_23_P316812 | 3.0 | 3.9  | -1.1 | 1.0 | AKR7A2P1 | Homo sapiens aldo-keto reductase family 7, member A2 pseudogene 1 (AKR7A2P1), non-coding RNA [NR_002796]       | 246182 |
| A_23_P103968 | 2.2 | -3.9 | -1.0 | 1.6 | AKR7A3   | Homo sapiens aldo-keto reductase family 7, member A3 (aflatoxin aldehyde reductase) (AKR7A3), mRNA [NM_012067] | 22977  |
| A_23_P320304 | 5.8 | 5.3  | 1.4  | 2.5 | AKR7L    | Homo sapiens aldo-keto reductase family 7-like (AKR7L), transcript variant 1, non-coding RNA [NR_040288]       | 246181 |

|              |     |      |      |      |        |                                                                                                           |       |
|--------------|-----|------|------|------|--------|-----------------------------------------------------------------------------------------------------------|-------|
| A_23_P153502 | 1.8 | 2.4  | 1.7  | 1.6  | AKT1S1 | Homo sapiens AKT1 substrate 1 (proline-rich) (AKT1S1), transcript variant 1, mRNA [NM_032375]             | 84335 |
| A_23_P208870 | 2.2 | 2.3  | 1.6  | 1.4  | AKT2   | Homo sapiens v-akt murine thymoma viral oncogene homolog 2 (AKT2), transcript variant 1, mRNA [NM_001626] | 208   |
| A_24_P359267 | 1.1 | -1.0 | -2.8 | -1.8 | AKT2   | Homo sapiens v-akt murine thymoma viral oncogene homolog 2 (AKT2), transcript variant 1, mRNA [NM_001626] | 208   |

|              |     |     |      |      |       |                                                                                                                                     |       |
|--------------|-----|-----|------|------|-------|-------------------------------------------------------------------------------------------------------------------------------------|-------|
| A_23_P160354 | 1.5 | 1.4 | -2.1 | -1.0 | AKT3  | Homo sapiens v-akt murine thymoma viral oncogene homolog 3 (protein kinase B, gamma) (AKT3), transcript variant 2, mRNA [NM_181690] | 10000 |
| A_23_P163622 | 1.1 | 1.1 | 1.1  | -2.8 | AKTIP | Homo sapiens AKT interacting protein (AKTIP), transcript variant 1, mRNA [NM_001012398]                                             | 64400 |
| A_23_P324278 | 2.0 | 1.4 | -1.6 | 2.5  | ALAD  | Homo sapiens aminolevulinic acid dehydratase (ALAD), mRNA [NM_000031]                                                               | 210   |

|              |      |      |      |      |          |                                                                                                             |        |
|--------------|------|------|------|------|----------|-------------------------------------------------------------------------------------------------------------|--------|
| A_24_P191588 | 3.4  | 1.5  | 1.9  | 1.6  | ALAS1    | Homo sapiens aminolevulinate, delta-, synthase 1 (ALAS1), transcript variant 1, mRNA [NM_000688]            | 211    |
| A_32_P74643  | -2.1 | -2.6 | -6.0 | -1.8 | ALCAM    | Homo sapiens activated leukocyte cell adhesion molecule (ALCAM), transcript variant 1, mRNA [NM_001627]     | 214    |
| A_24_P5743   | -1.7 | 1.0  | 1.3  | -3.4 | ALDH16A1 | Homo sapiens aldehyde dehydrogenase 16 family, member A1 (ALDH16A1), transcript variant 1, mRNA [NM_153329] | 126133 |

|              |      |      |      |      |         |                                                                                                                                  |       |
|--------------|------|------|------|------|---------|----------------------------------------------------------------------------------------------------------------------------------|-------|
| A_23_P99956  | -5.0 | 1.1  | 1.0  | -1.0 | ALDH1A2 | Homo sapiens aldehyde dehydrogenase 1 family, member A2 (ALDH1A2), transcript variant 3, mRNA [NM_170697]                        | 8854  |
| A_24_P64233  | -2.4 | -1.3 | -3.4 | 1.5  | ALDH1B1 | Homo sapiens aldehyde dehydrogenase 1 family, member B1 (ALDH1B1), nuclear gene encoding mitochondrial protein, mRNA [NM_000692] | 219   |
| A_24_P941870 | -1.0 | -1.5 | -1.7 | -3.2 | ALDH1L1 | aldehyde dehydrogenase 1 family, member L1 [Source:HGNC Symbol;Acc:3978] [ENST0000484724]                                        | 10840 |

|              |      |      |      |      |         |                                                                                                                                                           |        |
|--------------|------|------|------|------|---------|-----------------------------------------------------------------------------------------------------------------------------------------------------------|--------|
| A_32_P117016 | -1.2 | -2.8 | -1.3 | -1.0 | ALDH1L2 | Homo sapiens aldehyde dehydrogenase 1 family, member L2 (ALDH1L2), nuclear gene encoding mitochondrial protein, transcript variant 1, mRNA [NM_001034173] | 160428 |
| A_24_P218688 | 1.3  | 1.6  | 1.6  | -2.9 | ALDH3B1 | Homo sapiens aldehyde dehydrogenase 3 family, member B1 (ALDH3B1), transcript variant 1, mRNA [NM_000694]                                                 | 221    |

|              |      |      |      |      |         |                                                                                                                                                             |      |
|--------------|------|------|------|------|---------|-------------------------------------------------------------------------------------------------------------------------------------------------------------|------|
| A_23_P170337 | -1.6 | -1.8 | -1.5 | -2.2 | ALDH4A1 | Homo sapiens aldehyde dehydrogenase 4 family, member A1 (ALDH4A1), nuclear gene encoding mitochondrial protein, transcript variant P5CDhL, mRNA [NM_003748] | 8659 |
| A_24_P263036 | 1.5  | -2.3 | 1.8  | 1.0  | ALDH4A1 | Homo sapiens aldehyde dehydrogenase 4 family, member A1 (ALDH4A1), nuclear gene encoding mitochondrial protein, transcript variant P5CDhL, mRNA [NM_003748] | 8659 |

|              |      |     |      |      |         |                                                                                                                                                        |      |
|--------------|------|-----|------|------|---------|--------------------------------------------------------------------------------------------------------------------------------------------------------|------|
| A_24_P3761   | -2.9 | 1.4 | -1.1 | 1.8  | ALDH5A1 | Homo sapiens aldehyde dehydrogenase 5 family, member A1 (ALDH5A1), nuclear gene encoding mitochondrial protein, transcript variant 1, mRNA [NM_170740] | 7915 |
| A_23_P128967 | 1.2  | 1.0 | -1.6 | -4.3 | ALDH6A1 | Homo sapiens aldehyde dehydrogenase 6 family, member A1 (ALDH6A1), nuclear gene encoding mitochondrial protein, mRNA [NM_005589]                       | 4329 |



|              |     |     |      |     |       |                                                                                                |     |
|--------------|-----|-----|------|-----|-------|------------------------------------------------------------------------------------------------|-----|
| A_24_P921584 | 2.1 | 1.3 | -1.1 | 1.9 | ALDOA | Homo sapiens aldolase A, fructose-bisphosphate (ALDOA), transcript variant 2, mRNA [NM_184041] | 226 |
| A_23_P32143  | 1.5 | 1.2 | 1.8  | 2.6 | ALDOB | Homo sapiens aldolase B, fructose-bisphosphate (ALDOB), mRNA [NM_000035]                       | 229 |
| A_23_P78108  | 1.8 | 2.1 | 2.4  | 2.0 | ALDOC | Homo sapiens aldolase C, fructose-bisphosphate (ALDOC), mRNA [NM_005165]                       | 230 |

|              |      |      |      |       |      |                                                                                                                               |       |
|--------------|------|------|------|-------|------|-------------------------------------------------------------------------------------------------------------------------------|-------|
| A_23_P66306  | 12.3 | 13.5 | 13.4 | 3.8   | ALG1 | Homo sapiens asparagine-linked glycosylation 1, beta-1,4-mannosyltransferase homolog (S. cerevisiae) (ALG1), mRNA [NM_019109] | 56052 |
| A_32_P169131 | -6.1 | -1.3 | -1.0 | 1.1   | ALG1 | Homo sapiens asparagine-linked glycosylation 1, beta-1,4-mannosyltransferase homolog (S. cerevisiae) (ALG1), mRNA [NM_019109] | 56052 |
| A_24_P565556 | 1.9  | 2.0  | 1.9  | -19.8 | ALG1 | Homo sapiens asparagine-linked glycosylation 1, beta-1,4-mannosyltransferase homolog (S. cerevisiae) (ALG1), mRNA [NM_019109] | 56052 |

|              |      |      |     |     |       |                                                                                                                                                      |        |
|--------------|------|------|-----|-----|-------|------------------------------------------------------------------------------------------------------------------------------------------------------|--------|
| A_23_P60718  | 3.7  | -1.4 | 3.7 | 1.8 | ALG12 | Homo sapiens asparagine-linked glycosylation 12, alpha-1,6-mannosyltransferase homolog (S. cerevisiae) (ALG12), mRNA [NM_024105]                     | 79087  |
| A_24_P583350 | 4.8  | 2.2  | 4.0 | 2.8 | ALG1L | Homo sapiens asparagine-linked glycosylation 1-like (ALG1L), transcript variant 2, mRNA [NM_001015050]                                               | 200810 |
| A_24_P414269 | -2.6 | -1.7 | 1.0 | 1.0 | ALG3  | Homo sapiens asparagine-linked glycosylation 3, alpha-1,3-mannosyltransferase homolog (S. cerevisiae) (ALG3), transcript variant 1, mRNA [NM_005787] | 10195  |

|              |      |      |      |      |      |                                                                                                                                                                    |       |
|--------------|------|------|------|------|------|--------------------------------------------------------------------------------------------------------------------------------------------------------------------|-------|
| A_23_P151436 | -1.4 | -1.2 | -2.1 | -1.8 | ALG5 | Homo sapiens asparagine-linked glycosylation 5, dolichyl-phosphate beta-glucosyltransferase homolog (S. cerevisiae) (ALG5), transcript variant 1, mRNA [NM_013338] | 29880 |
| A_23_P35168  | 1.3  | 1.2  | 2.1  | 1.3  | ALG6 | Homo sapiens asparagine-linked glycosylation 6, alpha-1,3-glucosyltransferase homolog (S. cerevisiae) (ALG6), mRNA [NM_013339]                                     | 29929 |

|              |      |      |      |      |        |                                                                                                                                                         |       |
|--------------|------|------|------|------|--------|---------------------------------------------------------------------------------------------------------------------------------------------------------|-------|
| A_24_P795594 | -5.0 | -1.0 | -1.7 | -1.3 | ALG9   | Homo sapiens asparagine-linked glycosylation 9, alpha-1,2-mannosyltransferase homolog (S. cerevisiae) (ALG9), transcript variant 3, mRNA [NM_001077691] | 79796 |
| A_23_P64193  | -2.1 | -2.2 | 1.0  | 1.4  | ALG9   | Homo sapiens asparagine-linked glycosylation 9, alpha-1,2-mannosyltransferase homolog (S. cerevisiae) (ALG9), transcript variant 3, mRNA [NM_001077691] | 79796 |
| A_23_P14543  | -2.0 | -6.6 | 4.1  | -1.0 | ALKBH1 | Homo sapiens alkB, alkylation repair homolog 1 (E. coli) (ALKBH1), mRNA [NM_006020]                                                                     | 8846  |

|              |      |      |      |      |        |                                                                                                              |        |
|--------------|------|------|------|------|--------|--------------------------------------------------------------------------------------------------------------|--------|
| A_24_P628384 | -1.3 | -1.2 | 3.5  | 2.0  | ALKBH2 | Homo sapiens alkB, alkylation repair homolog 2 (E. coli) (ALKBH2), transcript variant 2, mRNA [NM_001001655] | 121642 |
| A_32_P28939  | 2.6  | 2.8  | -1.0 | -1.1 | ALKBH2 | Homo sapiens alkB, alkylation repair homolog 2 (E. coli) (ALKBH2), transcript variant 2, mRNA [NM_001001655] | 121642 |
| A_23_P255523 | 1.1  | 1.1  | -1.0 | -6.0 | ALKBH4 | Homo sapiens alkB, alkylation repair homolog 4 (E. coli) (ALKBH4), mRNA [NM_017621]                          | 54784  |
| A_23_P312179 | -4.0 | 1.8  | 1.6  | -2.1 | ALMS1  | Homo sapiens Alstrom syndrome 1 (ALMS1), mRNA [NM_015120]                                                    | 7840   |

|              |      |       |      |      |          |                                                                                               |        |
|--------------|------|-------|------|------|----------|-----------------------------------------------------------------------------------------------|--------|
| A_23_P435657 | -1.0 | -2.4  | -1.0 | -1.0 | ALMS1P   | Homo sapiens Alstrom syndrome 1 pseudogene (ALMS1P), non-coding RNA [NR_003683]               | 200420 |
| A_23_P152909 | 1.7  | 4.3   | 4.1  | -1.7 | ALOX12   | Homo sapiens arachidonate 12-lipoxygenase (ALOX12), mRNA [NM_000697]                          | 239    |
| A_23_P83634  | 1.2  | 1.3   | 1.3  | -3.0 | ALOX12B  | Homo sapiens arachidonate 12-lipoxygenase, 12R type (ALOX12B), mRNA [NM_001139]               | 242    |
| A_32_P440768 | -1.1 | -24.6 | -1.3 | -1.7 | ALOX12P2 | Homo sapiens arachidonate 12-lipoxygenase pseudogene 2 (ALOX12P2), non-coding RNA [NR_002710] | 245    |

|              |      |      |      |      |         |                                                                                                               |     |
|--------------|------|------|------|------|---------|---------------------------------------------------------------------------------------------------------------|-----|
| A_23_P55373  | 2.6  | 5.0  | 4.9  | 6.0  | ALOX15  | Homo sapiens arachidonate 15-lipoxygenase (ALOX15), mRNA [NM_001140]                                          | 246 |
| A_23_P2793   | -1.4 | -1.4 | 1.1  | -3.5 | ALOX5AP | Homo sapiens arachidonate 5-lipoxygenase-activating protein (ALOX5AP), transcript variant 1, mRNA [NM_001629] | 241 |
| A_24_P347378 | 1.7  | -1.1 | -1.5 | -2.1 | ALOX5AP | Homo sapiens arachidonate 5-lipoxygenase-activating protein (ALOX5AP), transcript variant 1, mRNA [NM_001629] | 241 |



|              |      |      |     |      |        |                                                                                           |       |
|--------------|------|------|-----|------|--------|-------------------------------------------------------------------------------------------|-------|
| A_24_P347880 | 2.3  | 1.3  | 1.6 | 1.0  | ALOXE3 | Homo sapiens arachidonate lipoxygenase 3 (ALOXE3), transcript variant 2, mRNA [NM_021628] | 59344 |
| A_23_P337658 | 1.1  | -2.8 | 1.6 | -1.0 | ALPI   | Homo sapiens alkaline phosphatase, intestinal (ALPI), mRNA [NM_001631]                    | 248   |
| A_23_P144531 | 1.1  | -1.0 | 2.1 | 1.0  | ALPK1  | alpha-kinase 1 [Source:HGNC Symbol;Acc:20917] [ENST00000309610]                           | 80216 |
| A_23_P133142 | -1.0 | -2.0 | 1.2 | -1.1 | ALPK1  | Homo sapiens alpha-kinase 1 (ALPK1), transcript variant 1, mRNA [NM_025144]               | 80216 |

|              |      |      |      |      |        |                                                                                                     |        |
|--------------|------|------|------|------|--------|-----------------------------------------------------------------------------------------------------|--------|
| A_23_P15876  | 5.9  | 5.6  | 5.8  | 3.6  | ALPK2  | Homo sapiens alpha-kinase 2 (ALPK2), mRNA [NM_052947]                                               | 115701 |
| A_23_P97046  | -1.6 | -1.4 | -3.1 | -1.8 | ALPL   | Homo sapiens alkaline phosphatase, liver/bone/kidney (ALPL), transcript variant 1, mRNA [NM_000478] | 249    |
| A_23_P79587  | 1.3  | 2.8  | 1.3  | -1.6 | ALPP   | Homo sapiens alkaline phosphatase, placental (ALPP), mRNA [NM_001632]                               | 250    |
| A_24_P131580 | 1.0  | 3.1  | 1.1  | 2.5  | ALPPL2 | Homo sapiens alkaline phosphatase, placental-like 2 (ALPPL2), mRNA [NM_031313]                      | 251    |

|              |      |      |      |      |        |                                                                                                        |        |
|--------------|------|------|------|------|--------|--------------------------------------------------------------------------------------------------------|--------|
| A_24_P222410 | 1.8  | 1.3  | -2.1 | -1.9 | ALS2   | Homo sapiens amyotrophic lateral sclerosis 2 (juvenile) (ALS2), transcript variant 1, mRNA [NM_020919] | 57679  |
| A_23_P416705 | -2.4 | -1.2 | -1.7 | -1.2 | ALS2CL | Homo sapiens ALS2 C-terminal like (ALS2CL), transcript variant 1, mRNA [NM_147129]                     | 259173 |
| A_32_P420009 | 1.1  | -2.2 | 1.3  | -1.8 | ALS2CL | Homo sapiens ALS2 C-terminal like (ALS2CL), transcript variant 1, mRNA [NM_147129]                     | 259173 |
| A_23_P85941  | -2.0 | -2.2 | -2.5 | -4.7 | ALX3   | Homo sapiens ALX homeobox 3 (ALX3), mRNA [NM_006492]                                                   | 257    |

|              |      |       |      |      |       |                                                                                                                                         |       |
|--------------|------|-------|------|------|-------|-----------------------------------------------------------------------------------------------------------------------------------------|-------|
| A_23_P161792 | 1.5  | 1.5   | 1.0  | -3.9 | ALX4  | Homo sapiens ALX homeobox 4 (ALX4), mRNA [NM_021926]                                                                                    | 60529 |
| A_24_P106297 | -1.6 | -39.6 | -1.6 | -1.6 | AMACR | Homo sapiens alpha-methylacyl-CoA racemase (AMACR), nuclear gene encoding mitochondrial protein, transcript variant 1, mRNA [NM_014324] | 23600 |
| A_23_P44867  | -1.1 | 1.4   | 2.1  | -1.2 | AMBN  | Homo sapiens ameloblastin (enamel matrix protein) (AMBN), mRNA [NM_016519]                                                              | 258   |

|              |      |      |      |      |        |                                                                                                  |       |
|--------------|------|------|------|------|--------|--------------------------------------------------------------------------------------------------|-------|
| A_23_P256504 | -1.0 | -2.6 | -1.8 | -1.1 | AMBP   | Homo sapiens alpha-1-microglobulin/bikunin precursor (AMBP), mRNA [NM_001633]                    | 259   |
| A_24_P371962 | 1.8  | 6.2  | -1.4 | -1.3 | AMD1   | Homo sapiens adenosylmethionine decarboxylase 1 (AMD1), transcript variant 1, mRNA [NM_001634]   | 262   |
| A_23_P49351  | 2.7  | 2.3  | 2.6  | 2.2  | AMDHD2 | Homo sapiens amidohydrolase domain containing 2 (AMDHD2), transcript variant 1, mRNA [NM_015944] | 51005 |

|              |      |      |      |      |        |                                                                                                                 |        |
|--------------|------|------|------|------|--------|-----------------------------------------------------------------------------------------------------------------|--------|
| A_23_P96478  | -1.5 | -1.6 | -3.8 | -1.6 | AMELX  | Homo sapiens amelogenin, X-linked (AMELX), transcript variant 2, mRNA [NM_182681]                               | 265    |
| A_23_P78944  | 1.6  | 1.1  | -2.3 | 1.6  | AMH    | Homo sapiens anti-Mullerian hormone (AMH), mRNA [NM_000479]                                                     | 268    |
| A_24_P115990 | 2.3  | 2.3  | 1.4  | 9.1  | AMHR2  | Homo sapiens anti-Mullerian hormone receptor, type II (AMHR2), transcript variant 1, mRNA [NM_020547]           | 269    |
| A_24_P192914 | -2.6 | -2.7 | -2.9 | -2.8 | AMICA1 | Homo sapiens adhesion molecule, interacts with CXADR antigen 1 (AMICA1), transcript variant 2, mRNA [NM_153206] | 120425 |

|              |     |      |      |      |        |                                                                                                       |        |
|--------------|-----|------|------|------|--------|-------------------------------------------------------------------------------------------------------|--------|
| A_23_P97598  | 1.1 | 1.1  | 1.6  | -2.2 | AMIGO1 | Homo sapiens adhesion molecule with Ig-like domain 1 (AMIGO1), mRNA [NM_020703]                       | 57463  |
| A_23_P14083  | 1.2 | 1.5  | -1.0 | -2.1 | AMIGO2 | Homo sapiens adhesion molecule with Ig-like domain 2 (AMIGO2), transcript variant 2, mRNA [NM_181847] | 347902 |
| A_23_P306655 | 1.4 | -2.4 | 1.2  | -1.6 | AMIGO3 | Homo sapiens adhesion molecule with Ig-like domain 3 (AMIGO3), mRNA [NM_198722]                       | 386724 |

|              |      |      |      |      |         |                                                                                                                                                                     |      |
|--------------|------|------|------|------|---------|---------------------------------------------------------------------------------------------------------------------------------------------------------------------|------|
| A_23_P137116 | -1.2 | -6.1 | -1.0 | -1.0 | AMMECR1 | Homo sapiens Alport syndrome, mental retardation, midface hypoplasia and elliptocytosis chromosomal region gene 1 (AMMECR1), transcript variant 1, mRNA [NM_015365] | 9949 |
| A_32_P201773 | -2.8 | 1.0  | -1.0 | 1.0  | AMMECR1 | Homo sapiens Alport syndrome, mental retardation, midface hypoplasia and elliptocytosis chromosomal region gene 1 (AMMECR1), transcript variant 1, mRNA [NM_015365] | 9949 |



|              |      |      |      |       |        |                                                                                                  |        |
|--------------|------|------|------|-------|--------|--------------------------------------------------------------------------------------------------|--------|
| A_23_P138796 | 1.5  | -4.8 | 1.4  | 1.3   | AMOTL1 | Homo sapiens angiomin like 1 (AMOTL1), mRNA [NM_130847]                                          | 154810 |
| A_24_P329815 | 2.7  | 1.4  | 4.3  | 2.2   | AMOTL1 | Homo sapiens angiomin like 1 (AMOTL1), mRNA [NM_130847]                                          | 154810 |
| A_23_P166686 | 1.2  | -1.5 | 1.0  | -3.3  | AMOTL2 | Homo sapiens angiomin like 2 (AMOTL2), mRNA [NM_016201]                                          | 51421  |
| A_23_P51787  | -1.4 | -1.4 | -1.4 | -24.4 | AMPD1  | Homo sapiens adenosine monophosphate deaminase 1 (AMPD1), transcript variant 1, mRNA [NM_000036] | 270    |

|              |      |      |       |      |        |                                                                                                                                |        |
|--------------|------|------|-------|------|--------|--------------------------------------------------------------------------------------------------------------------------------|--------|
| A_24_P174503 | 1.0  | -1.0 | -3.9  | -1.8 | AMT    | Homo sapiens aminomethyltransferase (AMT), nuclear gene encoding mitochondrial protein, transcript variant 1, mRNA [NM_000481] | 275    |
| A_24_P383649 | -3.7 | -1.0 | -12.1 | -1.0 | AMZ1   | Homo sapiens archaelysin family metalloproteinase 1 (AMZ1), mRNA [NM_133463]                                                   | 155185 |
| A_24_P410587 | 1.0  | 1.0  | 2.2   | 1.0  | AMZ2P1 | Homo sapiens archaelysin family metalloproteinase 2 pseudogene 1 (AMZ2P1), non-coding RNA [NR_026903]                          | 201283 |

|              |      |      |      |      |         |                                                                                                         |       |
|--------------|------|------|------|------|---------|---------------------------------------------------------------------------------------------------------|-------|
| A_24_P186346 | 1.0  | 1.5  | -3.1 | -1.3 | ANAPC1  | Homo sapiens anaphase promoting complex subunit 1 (ANAPC1), mRNA [NM_022662]                            | 64682 |
| A_32_P12104  | 1.9  | 1.9  | -6.1 | 1.9  | ANAPC1  | Homo sapiens anaphase promoting complex subunit 1 (ANAPC1), mRNA [NM_022662]                            | 64682 |
| A_23_P27147  | -2.4 | 1.2  | 1.7  | -1.4 | ANAPC11 | Homo sapiens anaphase promoting complex subunit 11 (ANAPC11), transcript variant 1, mRNA [NM_001002244] | 51529 |
| A_23_P317800 | 1.0  | -3.2 | 1.0  | 1.0  | ANAPC4  | Homo sapiens anaphase promoting complex subunit 4 (ANAPC4), mRNA [NM_013367]                            | 29945 |

|              |      |       |      |      |        |                                                                                                    |       |
|--------------|------|-------|------|------|--------|----------------------------------------------------------------------------------------------------|-------|
| A_23_P377830 | 1.1  | -8.9  | -1.0 | 1.0  | ANAPC5 | Homo sapiens anaphase promoting complex subunit 5 (ANAPC5), transcript variant 1, mRNA [NM_016237] | 51433 |
| A_23_P44636  | -1.0 | -2.2  | -1.1 | 1.0  | ANAPC7 | Homo sapiens anaphase promoting complex subunit 7 (ANAPC7), transcript variant 1, mRNA [NM_016238] | 51434 |
| A_23_P363406 | 1.0  | -3.1  | -1.0 | -4.2 | ANGEL1 | Homo sapiens angel homolog 1 (Drosophila) (ANGEL1), mRNA [NM_015305]                               | 23357 |
| A_23_P343237 | 1.1  | -12.3 | 1.1  | 1.0  | ANGEL2 | Homo sapiens angel homolog 2 (Drosophila) (ANGEL2), mRNA [NM_144567]                               | 90806 |

|              |      |      |      |      |         |                                                                               |       |
|--------------|------|------|------|------|---------|-------------------------------------------------------------------------------|-------|
| A_24_P60887  | -3.1 | 1.0  | 1.0  | 1.1  | ANGPT1  | Homo sapiens angiopoiet in 1 (ANGPT1), transcript variant 1, mRNA [NM_001146] | 284   |
| A_23_P216023 | -1.3 | 2.1  | 1.5  | 1.0  | ANGPT1  | Homo sapiens angiopoiet in 1 (ANGPT1), transcript variant 1, mRNA [NM_001146] | 284   |
| A_24_P367900 | -1.0 | -4.9 | -1.0 | -1.0 | ANGPT2  | angiopoiet in 2 [Source:HGNC Symbol;Acc:485] [ENST0000325203]                 | 285   |
| A_23_P68511  | 1.2  | 1.3  | -1.9 | -2.0 | ANGPT4  | Homo sapiens angiopoiet in 4 (ANGPT4), mRNA [NM_015985]                       | 51378 |
| A_23_P126706 | -2.5 | 1.0  | 1.3  | 1.3  | ANGPTL1 | Homo sapiens angiopoiet in-like 1 (ANGPTL1), mRNA [NM_004673]                 | 9068  |

|              |      |      |      |      |         |                                                                                                       |       |
|--------------|------|------|------|------|---------|-------------------------------------------------------------------------------------------------------|-------|
| A_24_P199484 | 2.4  | 2.5  | 2.5  | 2.7  | ANGPTL1 | Homo sapiens angiopoietin-like 1 (ANGPTL1), mRNA [NM_004673]                                          | 9068  |
| A_23_P50276  | 1.9  | 1.6  | 2.3  | 1.0  | ANGPTL6 | Homo sapiens angiopoietin-like 6 (ANGPTL6), mRNA [NM_031917]                                          | 83854 |
| A_23_P216108 | -1.5 | -3.2 | -1.0 | 1.2  | ANK1    | Homo sapiens ankyrin 1, erythrocytic (ANK1), transcript variant 3, mRNA [NM_000037]                   | 286   |
| A_23_P133068 | 1.0  | 1.0  | -1.0 | -2.2 | ANK2    | Homo sapiens ankyrin 2, neuronal (ANK2), transcript variant 1, mRNA [NM_001148]                       | 287   |
| A_32_P33304  | 10.1 | 9.9  | 9.5  | 9.2  | ANK3    | Homo sapiens ankyrin 3, node of Ranvier (ankyrin G) (ANK3), transcript variant 4, mRNA [NM_001204404] | 288   |

|              |      |      |      |      |        |                                                                                                         |        |
|--------------|------|------|------|------|--------|---------------------------------------------------------------------------------------------------------|--------|
| A_23_P350698 | -2.4 | -2.3 | -1.9 | -2.1 | ANKFN1 | Homo sapiens ankyrin-repeat and fibronectin type III domain containing 1 (ANKFN1), mRNA [NM_153228]     | 162282 |
| A_23_P92642  | 1.8  | -7.1 | 1.2  | -1.1 | ANKHD1 | Homo sapiens ankyrin repeat and KH domain containing 1 (ANKHD1), transcript variant 3, mRNA [NM_024668] | 54882  |
| A_24_P18020  | 1.0  | 1.0  | -2.6 | -1.1 | ANKIB1 | Homo sapiens ankyrin repeat and IBR domain containing 1 (ANKIB1), mRNA [NM_019004]                      | 54467  |

|              |      |      |      |     |         |                                                                                    |        |
|--------------|------|------|------|-----|---------|------------------------------------------------------------------------------------|--------|
| A_23_P93912  | 2.9  | 1.0  | 1.9  | 1.0 | ANKIB1  | Homo sapiens ankyrin repeat and IBR domain containing 1 (ANKIB1), mRNA [NM_019004] | 54467  |
| A_23_P142497 | 3.1  | 2.4  | 2.0  | 3.1 | ANKLE1  | Homo sapiens ankyrin repeat and LEM domain containing 1 (ANKLE1), mRNA [NM_152363] | 126549 |
| A_23_P159012 | -3.0 | 1.8  | 1.7  | 1.0 | ANKRA2  | Homo sapiens ankyrin repeat, family A (RFXANK-like), 2 (ANKRA2), mRNA [NM_023039]  | 57763  |
| A_23_P163639 | 1.0  | -1.8 | -1.0 | 2.0 | ANKRD11 | Homo sapiens ankyrin repeat domain 11 (ANKRD11), mRNA [NM_013275]                  | 29123  |



|              |      |      |      |      |          |                                                                                                           |        |
|--------------|------|------|------|------|----------|-----------------------------------------------------------------------------------------------------------|--------|
| A_32_P82403  | 1.2  | -1.0 | -2.3 | -1.1 | ANKRD11  | Homo sapiens ankyrin repeat domain 11 (ANKRD11), mRNA [NM_013275]                                         | 29123  |
| A_23_P130293 | -2.1 | 4.7  | 5.1  | 1.7  | ANKRD12  | Homo sapiens ankyrin repeat domain 12 (ANKRD12), transcript variant 1, mRNA [NM_015208]                   | 23253  |
| A_24_P76105  | 2.1  | -1.3 | 2.2  | 1.2  | ANKRD13D | Homo sapiens ankyrin repeat domain 13 family, member D (ANKRD13D), transcript variant 1, mRNA [NM_207354] | 338692 |

|              |      |      |      |      |          |                                                                                                           |        |
|--------------|------|------|------|------|----------|-----------------------------------------------------------------------------------------------------------|--------|
| A_24_P349356 | -1.0 | -2.6 | -4.4 | -3.1 | ANKRD13D | Homo sapiens ankyrin repeat domain 13 family, member D (ANKRD13D), transcript variant 1, mRNA [NM_207354] | 338692 |
| A_23_P150069 | 4.1  | 1.6  | -1.1 | 1.2  | ANKRD16  | Homo sapiens ankyrin repeat domain 16 (ANKRD16), transcript variant 4, mRNA [NM_001009943]                | 54522  |
| A_23_P144378 | -1.1 | 1.4  | 1.5  | 4.2  | ANKRD17  | Homo sapiens ankyrin repeat domain 17 (ANKRD17), transcript variant 1, mRNA [NM_032217]                   | 26057  |

|              |      |      |     |     |          |                                                                                                                   |        |
|--------------|------|------|-----|-----|----------|-------------------------------------------------------------------------------------------------------------------|--------|
| A_24_P220771 | -2.5 | 2.3  | 2.3 | 2.5 | ANKRD17  | Homo sapiens ankyrin repeat domain 17 (ANKRD17), transcript variant 1, mRNA [NM_032217]                           | 26057  |
| A_24_P172293 | 12.5 | 14.1 | 6.7 | 9.7 | ANKRD18A | ankyrin repeat domain 18A [Source:HGNC Symbol;Acc:23643] [ENST00000313339]                                        | 253650 |
| A_24_P188116 | 1.4  | 1.3  | 2.7 | 2.8 | ANKRD2   | Homo sapiens ankyrin repeat domain 2 (stretch responsive muscle) (ANKRD2), transcript variant 1, mRNA [NM_020349] | 26287  |

|              |      |      |      |      |           |                                                                                          |        |
|--------------|------|------|------|------|-----------|------------------------------------------------------------------------------------------|--------|
| A_24_P64241  | -3.5 | 1.1  | 1.0  | 1.0  | ANKRD20A2 | Homo sapiens ankyrin repeat domain 20 family, member A2 (ANKRD20A2), mRNA [NM_001012421] | 441430 |
| A_32_P168326 | 1.9  | -1.0 | -2.6 | -1.0 | ANKRD20A2 | Homo sapiens ankyrin repeat domain 20 family, member A2 (ANKRD20A2), mRNA [NM_001012421] | 441430 |
| A_24_P868583 | -2.9 | 1.1  | 1.1  | 1.1  | ANKRD20A2 | Homo sapiens ankyrin repeat domain 20 family, member A2 (ANKRD20A2), mRNA [NM_001012421] | 441430 |

|              |       |      |      |       |            |                                                                                                              |        |
|--------------|-------|------|------|-------|------------|--------------------------------------------------------------------------------------------------------------|--------|
| A_32_P150086 | -2.6  | 1.0  | 1.0  | -50.8 | ANKRD20A5P | Homo sapiens ankyrin repeat domain 20 family, member A5, pseudogene (ANKRD20A5P), non-coding RNA [NR_040113] | 440482 |
| A_24_P84220  | -21.3 | -1.0 | -1.1 | -1.0  | ANKRD20A9P | Homo sapiens ankyrin repeat domain 20 family, member A9, pseudogene (ANKRD20A9P), non-coding RNA [NR_027995] | 284232 |
| A_32_P13151  | 4.7   | 9.9  | 2.9  | 4.3   | ANKRD20A9P | Homo sapiens ankyrin repeat domain 20 family, member A9, pseudogene (ANKRD20A9P), non-coding RNA [NR_027995] | 284232 |

|              |      |      |      |      |         |                                                                                         |        |
|--------------|------|------|------|------|---------|-----------------------------------------------------------------------------------------|--------|
| A_23_P161428 | -1.0 | -1.1 | -7.7 | -1.7 | ANKRD22 | Homo sapiens ankyrin repeat domain 22 (ANKRD22), mRNA [NM_144590]                       | 118932 |
| A_32_P451874 | 3.8  | 1.8  | 2.9  | 1.8  | ANKRD24 | Homo sapiens ankyrin repeat domain 24 (ANKRD24), mRNA [NM_133475]                       | 170961 |
| A_23_P153640 | 2.0  | 2.3  | 1.5  | -1.1 | ANKRD27 | Homo sapiens ankyrin repeat domain 27 (VPS9 domain) (ANKRD27), mRNA [NM_032139]         | 84079  |
| A_23_P109794 | 4.1  | 1.2  | 2.8  | 2.6  | ANKRD28 | Homo sapiens ankyrin repeat domain 28 (ANKRD28), transcript variant 1, mRNA [NM_015199] | 23243  |

|              |      |      |      |      |          |                                                                                         |        |
|--------------|------|------|------|------|----------|-----------------------------------------------------------------------------------------|--------|
| A_24_P217365 | 3.2  | -1.9 | 1.5  | 1.4  | ANKRD28  | Homo sapiens ankyrin repeat domain 28 (ANKRD28), transcript variant 1, mRNA [NM_015199] | 23243  |
| A_23_P12533  | -1.5 | -1.0 | -9.5 | -1.1 | ANKRD30A | Homo sapiens ankyrin repeat domain 30A (ANKRD30A), mRNA [NM_052997]                     | 91074  |
| A_24_P357647 | 1.0  | -1.0 | -2.0 | -2.9 | ANKRD31  | Homo sapiens ankyrin repeat domain 31 (ANKRD31), mRNA [NM_001164443]                    | 256006 |
| A_24_P212072 | 4.0  | 3.9  | 1.1  | 2.0  | ANKRD32  | Homo sapiens ankyrin repeat domain 32 (ANKRD32), mRNA [NM_032290]                       | 84250  |

|              |     |      |      |      |          |                                                                                         |        |
|--------------|-----|------|------|------|----------|-----------------------------------------------------------------------------------------|--------|
| A_32_P516342 | 5.3 | -2.5 | 2.2  | 3.9  | ANKRD33  | Homo sapiens ankyrin repeat domain 33 (ANKRD33), transcript variant 2, mRNA [NM_182608] | 341405 |
| A_24_P83799  | 1.5 | 4.1  | 4.0  | 2.5  | ANKRD33B | Homo sapiens ankyrin repeat domain 33B (ANKRD33B), mRNA [NM_001164440]                  | 651746 |
| A_32_P137604 | 2.1 | 4.5  | -1.1 | 5.8  | ANKRD33B | Homo sapiens ankyrin repeat domain 33B (ANKRD33B), mRNA [NM_001164440]                  | 651746 |
| A_23_P325690 | 2.0 | 2.0  | 1.8  | -1.3 | ANKRD35  | Homo sapiens ankyrin repeat domain 35 (ANKRD35), mRNA [NM_144698]                       | 148741 |



|              |     |     |      |      |            |                                                                                                                 |       |
|--------------|-----|-----|------|------|------------|-----------------------------------------------------------------------------------------------------------------|-------|
| A_23_P253622 | 2.2 | 1.5 | -1.5 | 1.1  | ANKRD36B   | Homo sapiens cDNA: FLJ21281 fis, clone COL01904. [AK024934 ]                                                    | 57730 |
| A_24_P324749 | 1.2 | 1.2 | 1.1  | -2.5 | ANKRD36B   | Homo sapiens CLL-associated antigen KW-1 splice variant 2 mRNA, partial cds; alternatively spliced. [AF432209 ] | 57730 |
| A_23_P97123  | 1.0 | 1.3 | -3.0 | 1.3  | ANKRD36BP1 | Homo sapiens ankyrin repeat domain 36B pseudogene 1 (ANKRD36BP1), non-coding RNA [NR_026844]                    | 84832 |

|              |     |      |      |      |         |                                                                           |        |
|--------------|-----|------|------|------|---------|---------------------------------------------------------------------------|--------|
| A_23_P95027  | 3.6 | 3.2  | 1.1  | 2.3  | ANKRD39 | Homo sapiens ankyrin repeat domain 39 (ANKRD39), mRNA [NM_016466]         | 51239  |
| A_23_P400406 | 1.1 | -2.6 | -1.0 | -1.8 | ANKRD43 | Homo sapiens ankyrin repeat domain 43 (ANKRD43), mRNA [NM_175873]         | 134548 |
| A_24_P307498 | 1.1 | 1.0  | 1.0  | -2.5 | ANKRD45 | Homo sapiens ankyrin repeat domain 45 (ANKRD45), mRNA [NM_198493]         | 339416 |
| A_24_P662086 | 1.6 | 1.3  | 2.4  | -1.0 | ANKRD46 | ankyrin repeat domain 46 [Source:HGNC Symbol;Acc:27229] [ENST00000524319] | 157567 |

|              |      |      |      |      |         |                                                                                         |       |
|--------------|------|------|------|------|---------|-----------------------------------------------------------------------------------------|-------|
| A_23_P256047 | -8.8 | -1.0 | -2.8 | -1.3 | ANKRD5  | Homo sapiens ankyrin repeat domain 5 (ANKRD5), transcript variant 1, mRNA [NM_022096]   | 63926 |
| A_23_P81017  | -1.3 | -1.4 | -2.7 | -3.4 | ANKRD50 | Homo sapiens ankyrin repeat domain 50 (ANKRD50), transcript variant 1, mRNA [NM_020337] | 57182 |
| A_24_P371184 | 1.1  | -2.1 | -1.2 | -1.4 | ANKRD53 | Homo sapiens ankyrin repeat domain 53 (ANKRD53), transcript variant 2, mRNA [NM_024933] | 79998 |

|              |      |      |      |      |         |                                                                                         |        |
|--------------|------|------|------|------|---------|-----------------------------------------------------------------------------------------|--------|
| A_23_P120921 | 1.3  | -2.6 | 1.2  | -1.0 | ANKRD54 | Homo sapiens ankyrin repeat domain 54 (ANKRD54), transcript variant 1, mRNA [NM_138797] | 129138 |
| A_24_P146188 | 1.1  | -2.6 | -1.0 | 1.8  | ANKRD6  | Homo sapiens ankyrin repeat domain 6 (ANKRD6), transcript variant 3, mRNA [NM_014942]   | 22881  |
| A_23_P250231 | -1.1 | -2.3 | -1.1 | -1.1 | ANKRD7  | Homo sapiens ankyrin repeat domain 7 (ANKRD7), mRNA [NM_019644]                         | 56311  |
| A_23_P307525 | -8.2 | 1.8  | 1.6  | 1.3  | ANKRD9  | Homo sapiens ankyrin repeat domain 9 (ANKRD9), mRNA [NM_152326]                         | 122416 |

|              |      |      |      |      |       |                                                                                                                         |        |
|--------------|------|------|------|------|-------|-------------------------------------------------------------------------------------------------------------------------|--------|
| A_32_P16975  | -1.1 | -1.6 | -1.7 | -3.9 | ANKS3 | Homo sapiens ankyrin repeat and sterile alpha motif domain containing 3 (ANKS3), transcript variant 1, mRNA [NM_133450] | 124401 |
| A_24_P358400 | -2.2 | 1.0  | 1.1  | 1.8  | ANKS6 | Homo sapiens cDNA clone IMAGE:3620129. [BC012981]                                                                       | 203286 |
| A_23_P362183 | -5.6 | -1.1 | -1.2 | -1.1 | ANKS6 | Homo sapiens ankyrin repeat and sterile alpha motif domain containing 6 (ANKS6), mRNA [NM_173551]                       | 203286 |

|              |      |     |      |      |        |                                                                                                                  |        |
|--------------|------|-----|------|------|--------|------------------------------------------------------------------------------------------------------------------|--------|
| A_24_P340954 | -2.0 | 1.3 | 1.2  | -1.0 | ANKUB1 | Homo sapiens ankyrin repeat and ubiquitin domain containing 1 (ANKUB1), mRNA [NM_001144960]                      | 389161 |
| A_23_P119907 | 5.3  | 5.3 | 5.3  | 5.4  | ANKZF1 | Homo sapiens ankyrin repeat and zinc finger domain containing 1 (ANKZF1), transcript variant 1, mRNA [NM_018089] | 55139  |
| A_24_P87036  | 1.5  | 1.5 | -2.0 | -1.1 | ANO1   | Homo sapiens anoctamin 1, calcium activated chloride channel (ANO1), transcript variant 1, mRNA [NM_018043]      | 55107  |

|              |      |      |      |      |        |                                                                                                          |        |
|--------------|------|------|------|------|--------|----------------------------------------------------------------------------------------------------------|--------|
| A_32_P141238 | -3.8 | -1.4 | -1.1 | -1.7 | ANO2   | Homo sapiens anoctamin 2 (ANO2), mRNA [NM_020373]                                                        | 57101  |
| A_23_P53641  | -5.2 | -1.0 | -1.0 | -1.0 | ANO6   | Homo sapiens anoctamin 6 (ANO6), transcript variant 1, mRNA [NM_001025356]                               | 196527 |
| A_32_P73452  | -2.2 | -1.1 | -1.1 | -1.1 | ANO8   | Homo sapiens anoctamin 8 (ANO8), mRNA [NM_020959]                                                        | 57719  |
| A_24_P8109   | 1.1  | 2.0  | -2.8 | -1.1 | ANO9   | Homo sapiens anoctamin 9 (ANO9), mRNA [NM_001012302]                                                     | 338440 |
| A_32_P133670 | -1.1 | -1.2 | -2.8 | -1.1 | ANP32A | Homo sapiens acidic (leucine-rich) nuclear phosphoprotein 32 family, member A (ANP32A), mRNA [NM_006305] | 8125   |

|              |       |      |      |      |        |                                                                                        |        |
|--------------|-------|------|------|------|--------|----------------------------------------------------------------------------------------|--------|
| A_24_P377144 | -1.4  | -4.0 | -2.0 | -2.3 | ANTXR2 | Homo sapiens anthrax toxin receptor 2 (ANTXR2), transcript variant 1, mRNA [NM_058172] | 118429 |
| A_23_P94501  | -22.7 | 1.1  | -1.0 | -1.0 | ANXA1  | Homo sapiens annexin A1 (ANXA1), mRNA [NM_000700]                                      | 301    |
| A_32_P150632 | -1.5  | 3.3  | 2.0  | 3.5  | ANXA11 | annexin A11 [Source:HGNC Symbol;Acc:535] [ENST00000372234]                             | 311    |
| A_24_P107142 | -1.7  | 1.6  | -2.1 | -4.1 | ANXA11 | Homo sapiens annexin A11 (ANXA11), transcript variant c, mRNA [NM_145869]              | 311    |
| A_32_P148345 | 1.1   | -3.9 | -1.0 | -1.0 | ANXA2  | Homo sapiens annexin A2 (ANXA2), transcript variant 2, mRNA [NM_001002857]             | 302    |



|              |      |      |      |      |         |                                                                            |     |
|--------------|------|------|------|------|---------|----------------------------------------------------------------------------|-----|
| A_32_P94798  | -3.5 | -3.2 | 1.5  | -7.7 | ANXA2   | Homo sapiens annexin A2 (ANXA2), transcript variant 2, mRNA [NM_001002857] | 302 |
| A_24_P204244 | -3.1 | -1.0 | -1.6 | 1.0  | ANXA2P1 | Homo sapiens annexin A2 pseudogene 1 (ANXA2P1), non-coding RNA [NR_001562] | 303 |
| A_23_P121716 | 1.7  | 2.5  | 1.7  | 1.7  | ANXA3   | Homo sapiens annexin A3 (ANXA3), mRNA [NM_005139]                          | 306 |
| A_23_P16976  | -2.1 | 1.8  | 1.4  | 1.3  | ANXA4   | Homo sapiens annexin A4 (ANXA4), mRNA [NM_001153]                          | 307 |
| A_23_P69720  | -1.7 | 2.0  | -1.6 | 1.2  | ANXA5   | Homo sapiens annexin A5 (ANXA5), mRNA [NM_001154]                          | 308 |

|              |      |      |      |      |         |                                                                                                                  |      |
|--------------|------|------|------|------|---------|------------------------------------------------------------------------------------------------------------------|------|
| A_23_P357104 | 1.7  | 2.3  | -1.0 | -2.7 | ANXA6   | Homo sapiens annexin A6 (ANXA6), transcript variant 1, mRNA [NM_001155]                                          | 309  |
| A_23_P395054 | -1.6 | 1.2  | -6.0 | -1.9 | ANXA8L2 | annexin A8-like 2 [Source:HGNC Symbol;Acc:23335] [ENST00000340243]                                               | 244  |
| A_23_P103617 | 1.0  | -2.4 | -1.1 | -1.1 | ANXA9   | Homo sapiens annexin A9 (ANXA9), mRNA [NM_003568]                                                                | 8416 |
| A_23_P4133   | 1.2  | -3.7 | -1.3 | -1.3 | AOC2    | Homo sapiens amine oxidase, copper containing 2 (retina-specific) (AOC2), transcript variant 1, mRNA [NM_001158] | 314  |

|              |       |      |      |      |       |                                                                                                                              |       |
|--------------|-------|------|------|------|-------|------------------------------------------------------------------------------------------------------------------------------|-------|
| A_23_P154037 | 2.8   | 2.7  | 4.7  | 2.6  | AOX1  | Homo sapiens aldehyde oxidase 1 (AOX1), mRNA [NM_001159]                                                                     | 316   |
| A_23_P69791  | -28.0 | -1.1 | -1.1 | -1.2 | AP1AR | Homo sapiens adaptor-related protein complex 1 associated regulatory protein (AP1AR), transcript variant 1, mRNA [NM_018569] | 55435 |
| A_23_P206788 | 1.1   | -2.9 | -1.8 | 1.1  | AP1G1 | Homo sapiens adaptor-related protein complex 1, gamma 1 subunit (AP1G1), transcript variant 1, mRNA [NM_001030007]           | 164   |

|              |      |      |      |      |       |                                                                                                   |       |
|--------------|------|------|------|------|-------|---------------------------------------------------------------------------------------------------|-------|
| A_23_P2967   | -1.2 | 2.2  | 1.8  | -1.9 | AP1G2 | Homo sapiens adaptor-related protein complex 1, gamma 2 subunit (AP1G2), mRNA [NM_003917]         | 8906  |
| A_23_P78543  | 1.9  | 2.1  | 1.5  | 2.8  | AP1M2 | Homo sapiens adaptor-related protein complex 1, mu 2 subunit (AP1M2), mRNA [NM_005498]            | 10053 |
| A_24_P937306 | -1.0 | -2.4 | -1.1 | -1.1 | AP1S2 | adaptor-related protein complex 1, sigma 2 subunit [Source:HGNC Symbol;Acc:560] [ENST00000380291] | 8905  |

|              |       |      |      |      |       |                                                                                                                 |        |
|--------------|-------|------|------|------|-------|-----------------------------------------------------------------------------------------------------------------|--------|
| A_23_P217384 | -2.4  | 1.1  | -1.0 | 1.0  | AP1S2 | Homo sapiens adaptor-related protein complex 1, sigma 2 subunit (AP1S2), mRNA [NM_003916]                       | 8905   |
| A_24_P105747 | 1.0   | 1.0  | 1.0  | -4.0 | AP1S3 | Homo sapiens adaptor-related protein complex 1, sigma 3 subunit (AP1S3), mRNA [NM_001039569]                    | 130340 |
| A_23_P4885   | -17.0 | -1.8 | 1.9  | 1.4  | AP2A1 | Homo sapiens adaptor-related protein complex 2, alpha 1 subunit (AP2A1), transcript variant 1, mRNA [NM_014203] | 160    |

|              |      |     |     |     |       |                                                                                                  |      |
|--------------|------|-----|-----|-----|-------|--------------------------------------------------------------------------------------------------|------|
| A_23_P136635 | 1.9  | 1.6 | 2.5 | 1.4 | AP3B1 | Homo sapiens adaptor-related protein complex 3, beta 1 subunit (AP3B1), mRNA [NM_003664]         | 8546 |
| A_32_P47510  | -2.1 | 1.5 | 1.4 | 1.0 | AP3B1 | adaptor-related protein complex 3, beta 1 subunit [Source:HGNC Symbol;Acc:566] [ENST00000255194] | 8546 |
| A_23_P77304  | 1.3  | 1.8 | 2.3 | 1.5 | AP3B2 | Homo sapiens adaptor-related protein complex 3, beta 2 subunit (AP3B2), mRNA [NM_004644]         | 8120 |

|              |      |      |      |      |       |                                                                                                              |       |
|--------------|------|------|------|------|-------|--------------------------------------------------------------------------------------------------------------|-------|
| A_23_P158938 | -1.0 | -6.6 | -1.9 | -1.0 | AP3M1 | Homo sapiens adaptor-related protein complex 3, mu 1 subunit (AP3M1), transcript variant 1, mRNA [NM_207012] | 26985 |
| A_24_P167030 | 1.4  | 2.0  | 1.6  | -1.0 | AP3M1 | Homo sapiens adaptor-related protein complex 3, mu 1 subunit (AP3M1), transcript variant 1, mRNA [NM_207012] | 26985 |
| A_32_P195853 | -1.0 | 2.0  | 1.1  | -1.1 | AP3M1 | Homo sapiens adaptor-related protein complex 3, mu 1 subunit (AP3M1), transcript variant 1, mRNA [NM_207012] | 26985 |

|              |      |      |      |      |       |                                                                                                                    |       |
|--------------|------|------|------|------|-------|--------------------------------------------------------------------------------------------------------------------|-------|
| A_23_P170331 | 1.7  | 2.0  | -2.1 | -1.1 | AP3M2 | Homo sapiens adaptor-related protein complex 3, mu 2 subunit (AP3M2), transcript variant 2, mRNA [NM_006803]       | 10947 |
| A_24_P401645 | 35.6 | 19.6 | 24.6 | 29.5 | AP4S1 | Homo sapiens adaptor-related protein complex 4, sigma 1 subunit (AP4S1), transcript variant 2, mRNA [NM_001128126] | 11154 |
| A_23_P36611  | 4.3  | 1.1  | 1.1  | 1.0  | APAF1 | Homo sapiens apoptotic peptidase activating factor 1 (APAF1), transcript variant 3, mRNA [NM_181861]               | 317   |



|              |      |      |      |      |       |                                                                                                                                                                                    |     |
|--------------|------|------|------|------|-------|------------------------------------------------------------------------------------------------------------------------------------------------------------------------------------|-----|
| A_32_P24857  | 2.1  | 1.0  | 1.9  | 1.7  | APBA1 | ij42f09.y1<br>Human<br>insulinom<br>a Homo<br>sapiens<br>cDNA<br>clone<br>IMAGE:56<br>33800 5',<br>mRNA<br>sequence<br>[BM51101<br>3]                                              | 320 |
| A_23_P1998   | -1.2 | -1.4 | -2.9 | -5.7 | APBB1 | Homo<br>sapiens<br>amyloid<br>beta (A4)<br>precursor<br>protein-<br>binding,<br>family B,<br>member 1<br>(Fe65)<br>(APBB1),<br>transcript<br>variant 1,<br>mRNA<br>[NM_0011<br>64] | 322 |
| A_24_P372613 | 3.5  | 3.8  | 3.1  | 1.1  | APBB1 | Homo<br>sapiens<br>amyloid<br>beta (A4)<br>precursor<br>protein-<br>binding,<br>family B,<br>member 1<br>(Fe65)<br>(APBB1),<br>transcript<br>variant 1,<br>mRNA<br>[NM_0011<br>64] | 322 |

|              |      |      |      |      |         |                                                                                                                              |       |
|--------------|------|------|------|------|---------|------------------------------------------------------------------------------------------------------------------------------|-------|
| A_23_P401700 | -4.6 | -1.6 | -1.8 | -2.8 | APBB1IP | Homo sapiens amyloid beta (A4) precursor protein-binding, family B, member 1 interacting protein (APBB1IP), mRNA [NM_019043] | 54518 |
| A_23_P12549  | 1.0  | -3.9 | -1.1 | -1.1 | APBB1IP | Homo sapiens amyloid beta (A4) precursor protein-binding, family B, member 1 interacting protein (APBB1IP), mRNA [NM_019043] | 54518 |
| A_24_P234701 | -1.2 | -1.2 | -2.5 | -1.3 | APBB2   | Homo sapiens amyloid beta (A4) precursor protein-binding, family B, member 2 (APBB2), transcript variant 1, mRNA [NM_004307] | 323   |

|              |      |      |      |      |       |                                                                                                                              |       |
|--------------|------|------|------|------|-------|------------------------------------------------------------------------------------------------------------------------------|-------|
| A_23_P10701  | 1.0  | 1.4  | -1.1 | -4.1 | APBB2 | Homo sapiens amyloid beta (A4) precursor protein-binding, family B, member 2 (APBB2), transcript variant 3, mRNA [NM_173075] | 323   |
| A_24_P918740 | -1.5 | -2.0 | -2.7 | -2.9 | APC   | Homo sapiens adenomatous polyposis coli (APC), transcript variant 3, mRNA [NM_000038]                                        | 324   |
| A_24_P254133 | 1.6  | 2.4  | 4.8  | 2.2  | APC2  | Homo sapiens adenomatosis polyposis coli 2 (APC2), mRNA [NM_005883]                                                          | 10297 |
| A_24_P76844  | 1.1  | 1.0  | -2.7 | -1.0 | APC2  | Homo sapiens adenomatosis polyposis coli 2 (APC2), mRNA [NM_005883]                                                          | 10297 |

|              |      |      |      |      |      |                                                                          |       |
|--------------|------|------|------|------|------|--------------------------------------------------------------------------|-------|
| A_23_P101905 | 1.1  | -1.3 | -5.7 | -1.2 | APC2 | Homo sapiens adenomatosis polyposis coli 2 (APC2), mRNA [NM_005883]      | 10297 |
| A_23_P101908 | 1.4  | -5.0 | 1.1  | 1.7  | APC2 | Homo sapiens adenomatosis polyposis coli 2 (APC2), mRNA [NM_005883]      | 10297 |
| A_24_P208794 | 2.6  | 3.0  | 1.1  | -1.1 | APEH | Homo sapiens N-acylamino acyl-peptide hydrolase (APEH), mRNA [NM_001640] | 327   |
| A_24_P404822 | 1.5  | 2.1  | 2.2  | 1.2  | APLN | Homo sapiens apelin (APLN), mRNA [NM_017413]                             | 8862  |
| A_23_P147755 | -1.3 | -1.0 | 1.1  | 4.5  | APLN | Homo sapiens apelin (APLN), mRNA [NM_017413]                             | 8862  |

|              |       |      |      |      |         |                                                                                                         |        |
|--------------|-------|------|------|------|---------|---------------------------------------------------------------------------------------------------------|--------|
| A_23_P318860 | -1.2  | -2.2 | -2.5 | -1.2 | APLNR   | Homo sapiens apelin receptor (APLNR), transcript variant 1, mRNA [NM_005161]                            | 187    |
| A_23_P27983  | -30.3 | 1.7  | -1.3 | 1.2  | APLP1   | Homo sapiens amyloid beta (A4) precursor-like protein 1 (APLP1), transcript variant 2, mRNA [NM_005166] | 333    |
| A_23_P126448 | -1.7  | -2.6 | -3.5 | -1.1 | APOA1BP | Homo sapiens apolipoprotein A-I binding protein (APOA1BP), mRNA [NM_144772]                             | 128240 |
| A_23_P87036  | -2.2  | 1.7  | -2.3 | 1.5  | APOA4   | Homo sapiens apolipoprotein A-IV (APOA4), mRNA [NM_000482]                                              | 337    |

|             |      |      |      |      |          |                                                                                                                                     |        |
|-------------|------|------|------|------|----------|-------------------------------------------------------------------------------------------------------------------------------------|--------|
| A_23_P75630 | -1.0 | -1.1 | -1.7 | -4.3 | APOA5    | Homo sapiens apolipoprotein A-V (APOA5), transcript variant 1, mRNA [NM_052968]                                                     | 116519 |
| A_32_P9543  | 1.1  | -2.4 | -3.7 | 1.4  | APOBEC3A | Homo sapiens apolipoprotein B mRNA editing enzyme, catalytic polypeptide-like 3A (APOBEC3A), transcript variant 1, mRNA [NM_145699] | 200315 |
| A_24_P66027 | 1.0  | -1.6 | 1.7  | -3.4 | APOBEC3B | Homo sapiens apolipoprotein B mRNA editing enzyme, catalytic polypeptide-like 3B (APOBEC3B), mRNA [NM_004900]                       | 9582   |

|              |      |      |      |     |          |                                                                                                                                     |        |
|--------------|------|------|------|-----|----------|-------------------------------------------------------------------------------------------------------------------------------------|--------|
| A_23_P132316 | -1.2 | 2.6  | 1.1  | 1.0 | APOBEC3D | Homo sapiens apolipoprotein B mRNA editing enzyme, catalytic polypeptide-like 3D (APOBEC3D), mRNA [NM_152426]                       | 140564 |
| A_23_P357101 | -1.0 | 2.2  | -1.0 | 1.0 | APOBEC3F | Homo sapiens apolipoprotein B mRNA editing enzyme, catalytic polypeptide-like 3F (APOBEC3F), transcript variant 1, mRNA [NM_145298] | 200316 |
| A_23_P143713 | 1.1  | -3.4 | 1.1  | 1.1 | APOBEC3G | Homo sapiens apolipoprotein B mRNA editing enzyme, catalytic polypeptide-like 3G (APOBEC3G), mRNA [NM_021822]                       | 60489  |

|             |      |      |       |      |       |                                                                                       |       |
|-------------|------|------|-------|------|-------|---------------------------------------------------------------------------------------|-------|
| A_23_P4649  | -1.0 | -1.0 | -12.7 | -1.1 | APOC1 | Homo sapiens apolipoprotein C-I (APOC1), mRNA [NM_001645]                             | 341   |
| A_23_P38244 | 1.1  | 1.0  | -1.2  | -2.0 | APOH  | Homo sapiens apolipoprotein H (beta-2-glycoprotein I) (APOH), mRNA [NM_000042]        | 350   |
| A_24_P48898 | 1.1  | 1.5  | 2.1   | 1.5  | APOL2 | Homo sapiens apolipoprotein L, 2 (APOL2), transcript variant beta, mRNA [NM_145637]   | 23780 |
| A_23_P29237 | 2.0  | 6.3  | 1.1   | 2.6  | APOL3 | Homo sapiens apolipoprotein L, 3 (APOL3), transcript variant beta/a, mRNA [NM_145641] | 80833 |



|              |      |      |      |      |       |                                                                                       |       |
|--------------|------|------|------|------|-------|---------------------------------------------------------------------------------------|-------|
| A_24_P416997 | -1.2 | -3.1 | -1.2 | -1.3 | APOL3 | Homo sapiens apolipoprotein L, 3 (APOL3), transcript variant beta/a, mRNA [NM_145641] | 80833 |
| A_23_P380857 | -1.0 | -3.1 | -1.0 | -1.0 | APOL4 | Homo sapiens apolipoprotein L, 4 (APOL4), transcript variant a, mRNA [NM_030643]      | 80832 |
| A_24_P374163 | 3.5  | 3.5  | 4.2  | 2.5  | APOL4 | apolipoprotein L, 4 [Source:HGNC Symbol;Acc:14867] [ENST00000328429]                  | 80832 |
| A_23_P155049 | -1.0 | -1.0 | -1.1 | -7.6 | APOL6 | Homo sapiens apolipoprotein L, 6 (APOL6), mRNA [NM_030641]                            | 80830 |
| A_24_P941167 | -1.0 | -1.0 | -1.1 | -3.3 | APOL6 | Homo sapiens apolipoprotein L, 6 (APOL6), mRNA [NM_030641]                            | 80830 |

|              |      |      |      |      |        |                                                                                                    |       |
|--------------|------|------|------|------|--------|----------------------------------------------------------------------------------------------------|-------|
| A_23_P48217  | 1.1  | -2.7 | -1.1 | -1.0 | APOLD1 | Homo sapiens apolipoprotein L domain containing 1 (APOLD1), transcript variant 2, mRNA [NM_030817] | 81575 |
| A_24_P89426  | 5.4  | 1.1  | -1.0 | -1.0 | APOM   | Homo sapiens apolipoprotein M (APOM), mRNA [NM_019101]                                             | 55937 |
| A_23_P61127  | 1.4  | 2.8  | -1.1 | 1.2  | APOO   | Homo sapiens apolipoprotein O (APOO), transcript variant 1, mRNA [NM_024122]                       | 79135 |
| A_23_P162879 | -2.7 | 2.7  | 3.4  | 1.8  | APOPT1 | Homo sapiens apoptogenic 1 (APOPT1), mRNA [NM_032374]                                              | 84334 |

|              |      |      |      |      |       |                                                                                                                                |       |
|--------------|------|------|------|------|-------|--------------------------------------------------------------------------------------------------------------------------------|-------|
| A_24_P302833 | -1.7 | -2.3 | -1.6 | -1.2 | APPL1 | Homo sapiens adaptor protein, phosphotyrosine interaction, PH domain and leucine zipper containing 1 (APPL1), mRNA [NM_012096] | 26060 |
| A_23_P117955 | 1.1  | -1.2 | -1.7 | -3.8 | APRT  | Homo sapiens adenine phosphoribosyltransferase (APRT), transcript variant 1, mRNA [NM_000485]                                  | 353   |
| A_23_P252775 | 1.1  | 2.1  | 1.9  | 1.1  | APTIX | Homo sapiens aprataxin (APTIX), transcript variant 1, mRNA [NM_175073]                                                         | 54840 |

|              |     |      |      |      |       |                                                                                              |       |
|--------------|-----|------|------|------|-------|----------------------------------------------------------------------------------------------|-------|
| A_23_P19894  | 1.4 | -3.5 | -1.2 | -1.2 | AQP1  | Homo sapiens aquaporin 1 (Colton blood group) (AQP1), transcript variant 1, mRNA [NM_198098] | 358   |
| A_23_P126613 | 1.9 | 2.2  | 4.3  | 1.5  | AQP10 | Homo sapiens aquaporin 10 (AQP10), mRNA [NM_080429]                                          | 89872 |
| A_23_P149398 | 2.1 | -1.1 | 1.6  | -1.6 | AQP10 | aquaporin 10 [Source:HGNC Symbol;Acc:16029] [ENST00000484864]                                | 89872 |
| A_23_P204721 | 1.6 | 3.7  | 1.6  | 1.6  | AQP2  | Homo sapiens aquaporin 2 (collecting duct) (AQP2), mRNA [NM_000486]                          | 359   |

|              |      |      |      |      |      |                                                                      |      |
|--------------|------|------|------|------|------|----------------------------------------------------------------------|------|
| A_23_P112482 | -1.0 | -1.1 | -4.1 | -1.1 | AQP3 | Homo sapiens aquaporin 3 (Gill blood group) (AQP3), mRNA [NM_004925] | 360  |
| A_23_P366812 | 2.8  | -1.9 | 1.0  | 2.1  | AQP5 | Homo sapiens aquaporin 5 (AQP5), mRNA [NM_001651]                    | 362  |
| A_23_P502060 | 3.9  | 3.9  | 3.7  | 3.9  | AQP6 | Homo sapiens aquaporin 6, kidney specific (AQP6), mRNA [NM_001652]   | 363  |
| A_24_P280378 | 1.3  | -1.1 | 1.4  | -4.3 | AQR  | Homo sapiens aquarius homolog (mouse) (AQR), mRNA [NM_014691]        | 9716 |

|              |      |      |      |     |       |                                                                                                                           |        |
|--------------|------|------|------|-----|-------|---------------------------------------------------------------------------------------------------------------------------|--------|
| A_24_P398432 | 1.6  | 2.2  | 2.2  | 1.2 | ARAP1 | Homo sapiens ArfGAP with RhoGAP domain, ankyrin repeat and PH domain 1 (ARAP1), transcript variant 3, mRNA [NM_001040118] | 116985 |
| A_23_P167389 | -5.8 | 1.0  | 1.0  | 1.1 | ARAP3 | Homo sapiens ArfGAP with RhoGAP domain, ankyrin repeat and PH domain 3 (ARAP3), mRNA [NM_022481]                          | 64411  |
| A_23_P203103 | -2.1 | -3.1 | -2.1 | 1.8 | ARCN1 | Homo sapiens archain 1 (ARCN1), transcript variant 1, mRNA [NM_001655]                                                    | 372    |

|              |      |      |      |      |      |                                                                                          |     |
|--------------|------|------|------|------|------|------------------------------------------------------------------------------------------|-----|
| A_24_P190894 | -1.0 | -1.5 | 2.6  | 2.6  | ARF1 | Homo sapiens ADP-ribosylation factor 1 (ARF1), transcript variant 1, mRNA [NM_001024227] | 375 |
| A_23_P36521  | 1.7  | 2.3  | -1.3 | -1.5 | ARF3 | Homo sapiens ADP-ribosylation factor 3 (ARF3), mRNA [NM_001659]                          | 377 |
| A_24_P187750 | -1.1 | -6.6 | -1.4 | -1.4 | ARF3 | Homo sapiens ADP-ribosylation factor 3 (ARF3), mRNA [NM_001659]                          | 377 |
| A_23_P254601 | 2.1  | -1.0 | -1.1 | 1.3  | ARF5 | Homo sapiens ADP-ribosylation factor 5 (ARF5), mRNA [NM_001662]                          | 381 |
| A_23_P48691  | -2.4 | -1.0 | -3.7 | 1.6  | ARF6 | Homo sapiens ADP-ribosylation factor 6 (ARF6), mRNA [NM_001663]                          | 382 |

|              |      |      |      |      |         |                                                                                                                    |       |
|--------------|------|------|------|------|---------|--------------------------------------------------------------------------------------------------------------------|-------|
| A_24_P271296 | 2.0  | 2.2  | 1.8  | -1.1 | ARFGAP1 | Homo sapiens ADP-ribosylation factor GTPase activating protein 1 (ARFGAP1), transcript variant 2, mRNA [NM_175609] | 55738 |
| A_23_P210379 | -1.6 | -1.1 | -2.3 | -2.1 | ARFGAP1 | Homo sapiens ADP-ribosylation factor GTPase activating protein 1 (ARFGAP1), transcript variant 2, mRNA [NM_175609] | 55738 |
| A_23_P161552 | -1.2 | -3.7 | -1.9 | 1.2  | ARFGAP2 | Homo sapiens ADP-ribosylation factor GTPase activating protein 2 (ARFGAP2), transcript variant 1, mRNA [NM_032389] | 84364 |



|              |     |     |      |      |         |                                                                                                                               |       |
|--------------|-----|-----|------|------|---------|-------------------------------------------------------------------------------------------------------------------------------|-------|
| A_23_P5995   | 3.9 | 3.8 | 3.7  | 1.1  | ARFGEF2 | Homo sapiens ADP-ribosylation factor guanine nucleotide-exchange factor 2 (brefeldin A-inhibited) (ARFGEF2), mRNA [NM_006420] | 10564 |
| A_23_P95050  | 1.2 | 1.1 | -1.0 | -3.3 | ARFIP1  | Homo sapiens ADP-ribosylation factor interacting protein 1 (ARFIP1), transcript variant 1, mRNA [NM_001025595]                | 27236 |
| A_24_P166094 | 2.0 | 4.5 | 2.8  | 3.3  | ARFIP1  | Homo sapiens ADP-ribosylation factor interacting protein 1 (ARFIP1), transcript variant 1, mRNA [NM_001025595]                | 27236 |

|              |      |     |     |      |         |                                                                                                             |       |
|--------------|------|-----|-----|------|---------|-------------------------------------------------------------------------------------------------------------|-------|
| A_23_P139228 | -1.1 | 1.2 | 1.3 | -2.8 | ARFIP2  | Homo sapiens ADP-ribosylation factor interacting protein 2 (ARFIP2), transcript variant 2, mRNA [NM_012402] | 23647 |
| A_23_P111321 | -3.2 | 1.4 | 1.4 | 1.5  | ARG1    | Homo sapiens arginase, liver (ARG1), transcript variant 2, mRNA [NM_000045]                                 | 383   |
| A_23_P128728 | 2.6  | 2.8 | 1.2 | -1.7 | ARG2    | Homo sapiens arginase, type II (ARG2), nuclear gene encoding mitochondrial protein, mRNA [NM_001172]        | 384   |
| A_23_P314070 | 1.3  | 1.0 | 2.6 | 2.3  | ARHGAP1 | Homo sapiens Rho GTPase activating protein 1 (ARHGAP1), mRNA [NM_004308]                                    | 392   |

|              |      |      |      |      |          |                                                                                                     |       |
|--------------|------|------|------|------|----------|-----------------------------------------------------------------------------------------------------|-------|
| A_23_P44057  | -1.7 | 1.4  | -1.2 | 2.7  | ARHGAP1  | Homo sapiens Rho GTPase activating protein 1 (ARHGAP1), mRNA [NM_004308]                            | 392   |
| A_23_P15113  | 5.5  | 6.9  | 5.9  | 1.0  | ARHGAP17 | Homo sapiens Rho GTPase activating protein 17 (ARHGAP17), transcript variant 1, mRNA [NM_001006634] | 55114 |
| A_23_P334845 | -3.5 | -4.5 | 1.0  | -1.0 | ARHGAP19 | Homo sapiens Rho GTPase activating protein 19 (ARHGAP19), transcript variant 1, mRNA [NM_032900]    | 84986 |
| A_23_P75310  | -1.1 | -6.8 | 1.0  | -1.2 | ARHGAP22 | Homo sapiens Rho GTPase activating protein 22 (ARHGAP22), mRNA [NM_021226]                          | 58504 |

|              |      |      |      |      |          |                                                                                                     |        |
|--------------|------|------|------|------|----------|-----------------------------------------------------------------------------------------------------|--------|
| A_24_P388659 | -2.8 | 1.2  | 1.1  | 1.1  | ARHGAP24 | Homo sapiens Rho GTPase activating protein 24 (ARHGAP24), transcript variant 1, mRNA [NM_001025616] | 83478  |
| A_23_P214066 | -1.0 | 1.6  | -1.6 | -2.2 | ARHGAP26 | Homo sapiens Rho GTPase activating protein 26 (ARHGAP26), transcript variant 1, mRNA [NM_015071]    | 23092  |
| A_23_P401626 | 2.9  | -1.1 | 1.7  | 2.3  | ARHGAP27 | Homo sapiens Rho GTPase activating protein 27 (ARHGAP27), transcript variant 3, mRNA [NM_174919]    | 201176 |

|              |        |      |      |      |          |                                                                                                     |        |
|--------------|--------|------|------|------|----------|-----------------------------------------------------------------------------------------------------|--------|
| A_23_P141342 | 2.9    | 3.1  | -1.2 | -1.1 | ARHGAP27 | Homo sapiens Rho GTPase activating protein 27 (ARHGAP27), transcript variant 1, mRNA [NM_199282]    | 201176 |
| A_23_P130359 | -1.1   | 1.0  | -3.4 | 1.8  | ARHGAP28 | Homo sapiens Rho GTPase activating protein 28 (ARHGAP28), mRNA [NM_001010000]                       | 79822  |
| A_23_P35045  | -113.7 | -1.2 | -1.2 | -1.3 | ARHGAP30 | Homo sapiens Rho GTPase activating protein 30 (ARHGAP30), transcript variant 1, mRNA [NM_001025598] | 257106 |

|              |     |      |      |      |          |                                                                                                  |        |
|--------------|-----|------|------|------|----------|--------------------------------------------------------------------------------------------------|--------|
| A_24_P911231 | 1.1 | -1.5 | -3.4 | -2.8 | ARHGAP30 | Homo sapiens Rho GTPase activating protein 30 (ARHGAP30), transcript variant 2, mRNA [NM_181720] | 257106 |
| A_24_P349039 | 2.4 | 2.4  | -1.8 | 3.5  | ARHGAP31 | Homo sapiens Rho GTPase activating protein 31 (ARHGAP31), mRNA [NM_020754]                       | 57514  |
| A_32_P226620 | 1.1 | -2.6 | 1.0  | 1.0  | ARHGAP31 | Rho GTPase activating protein 31 [Source:HGNC Symbol;Acc:29216] [ENST00000264245]                | 57514  |
| A_24_P42436  | 2.0 | 1.0  | 1.6  | 1.1  | ARHGAP32 | Homo sapiens Rho GTPase activating protein 32 (ARHGAP32), transcript variant 2, mRNA [NM_014715] | 9743   |

|             |      |      |      |      |          |                                                                                                |       |
|-------------|------|------|------|------|----------|------------------------------------------------------------------------------------------------|-------|
| A_24_P36299 | 1.1  | 2.1  | -1.1 | 1.1  | ARHGAP35 | Homo sapiens Rho GTPase activating protein 35 (ARHGAP35), mRNA [NM_004491]                     | 2909  |
| A_24_P41864 | -1.0 | -2.2 | -1.0 | -1.3 | ARHGAP6  | Homo sapiens Rho GTPase activating protein 6 (ARHGAP6), transcript variant 3, mRNA [NM_006125] | 395   |
| A_23_P64661 | 1.0  | 1.3  | -5.5 | 1.0  | ARHGAP9  | Homo sapiens Rho GTPase activating protein 9 (ARHGAP9), transcript variant 1, mRNA [NM_032496] | 64333 |

|              |      |      |      |      |         |                                                                                                           |     |
|--------------|------|------|------|------|---------|-----------------------------------------------------------------------------------------------------------|-----|
| A_24_P133933 | -1.5 | -1.1 | -5.3 | -3.0 | ARHGDIA | Homo sapiens Rho GDP dissociation inhibitor (GDI) alpha (ARHGDIA), transcript variant 2, mRNA [NM_004309] | 396 |
| A_23_P151075 | 1.5  | 2.2  | 2.7  | 1.1  | ARHGDIB | Homo sapiens Rho GDP dissociation inhibitor (GDI) beta (ARHGDIB), mRNA [NM_001175]                        | 397 |
| A_24_P215882 | 3.7  | 5.6  | 2.8  | 2.7  | ARHGDIG | Homo sapiens Rho GDP dissociation inhibitor (GDI) gamma (ARHGDIG), mRNA [NM_001176]                       | 398 |



|              |       |      |      |      |          |                                                                                                               |      |
|--------------|-------|------|------|------|----------|---------------------------------------------------------------------------------------------------------------|------|
| A_24_P202581 | 1.3   | 2.8  | 1.7  | 1.6  | ARHGEF1  | Homo sapiens Rho guanine nucleotide exchange factor (GEF) 1 (ARHGEF1), transcript variant 1, mRNA [NM_199002] | 9138 |
| A_24_P188085 | -18.5 | -1.1 | -1.2 | -1.2 | ARHGEF10 | Rho guanine nucleotide exchange factor (GEF) 10 [Source:HGNC Symbol;Acc:14103] [ENST00000523711]              | 9639 |
| A_23_P392024 | -1.1  | 1.0  | -1.0 | -2.0 | ARHGEF10 | Rho guanine nucleotide exchange factor (GEF) 10 [Source:HGNC Symbol;Acc:14103] [ENST00000522969]              | 9639 |

|              |      |      |      |      |          |                                                                                                                 |       |
|--------------|------|------|------|------|----------|-----------------------------------------------------------------------------------------------------------------|-------|
| A_24_P283535 | 1.6  | 1.7  | 2.2  | 1.0  | ARHGEF10 | Homo sapiens Rho guanine nucleotide exchange factor (GEF) 10 (ARHGEF10), mRNA [NM_014629]                       | 9639  |
| A_24_P175783 | -2.8 | -3.8 | -1.3 | -1.4 | ARHGEF12 | Homo sapiens Rho guanine nucleotide exchange factor (GEF) 12 (ARHGEF12), transcript variant 1, mRNA [NM_015313] | 23365 |
| A_24_P359007 | -1.5 | -1.6 | -1.2 | -2.5 | ARHGEF15 | Homo sapiens cDNA FLJ13791 fis, clone THYRO100007. [AK023853]                                                   | 22899 |

|              |      |      |      |      |          |                                                                                                                     |       |
|--------------|------|------|------|------|----------|---------------------------------------------------------------------------------------------------------------------|-------|
| A_23_P49674  | 1.9  | 2.5  | 2.4  | 1.2  | ARHGEF15 | Homo sapiens Rho guanine nucleotide exchange factor (GEF) 15 (ARHGEF15), transcript variant 1, mRNA [NM_173728]     | 22899 |
| A_23_P114670 | -1.3 | 1.6  | -1.0 | 2.2  | ARHGEF16 | Homo sapiens Rho guanine nucleotide exchange factor (GEF) 16 (ARHGEF16), mRNA [NM_014448]                           | 27237 |
| A_23_P50357  | -1.1 | -1.2 | -2.8 | -1.3 | ARHGEF18 | Homo sapiens Rho/Rac guanine nucleotide exchange factor (GEF) 18 (ARHGEF18), transcript variant 1, mRNA [NM_015318] | 23370 |

|              |     |      |      |      |              |                                                                                                                 |           |
|--------------|-----|------|------|------|--------------|-----------------------------------------------------------------------------------------------------------------|-----------|
| A_23_P332326 | 1.8 | -8.5 | -1.0 | -1.1 | ARHGEF19     | Homo sapiens Rho guanine nucleotide exchange factor (GEF) 19 (ARHGEF19), mRNA [NM_153213]                       | 128272    |
| A_23_P98844  | 4.3 | 2.2  | 2.3  | 2.2  | ARHGEF25     | Homo sapiens Rho guanine nucleotide exchange factor (GEF) 25 (ARHGEF25), transcript variant 1, mRNA [NM_182947] | 115557    |
| A_24_P740549 | 1.5 | 2.9  | 1.4  | -2.3 | ARHGEF26-AS1 | Homo sapiens ARHGEF26 antisense RNA 1 (non-protein coding) (ARHGEF26-AS1), non-coding RNA [NR_037901]           | 100507524 |

|              |      |      |      |      |         |                                                                                                               |       |
|--------------|------|------|------|------|---------|---------------------------------------------------------------------------------------------------------------|-------|
| A_23_P253221 | -5.1 | 1.7  | 1.6  | -3.9 | ARHGEF4 | Homo sapiens Rho guanine nucleotide exchange factor (GEF) 4 (ARHGEF4), transcript variant 2, mRNA [NM_032995] | 50649 |
| A_24_P302685 | 16.0 | 14.8 | 15.4 | 5.3  | ARHGEF4 | Homo sapiens Rho guanine nucleotide exchange factor (GEF) 4 (ARHGEF4), transcript variant 1, mRNA [NM_015320] | 50649 |
| A_23_P85024  | 1.6  | 2.9  | 1.1  | -1.2 | ARHGEF6 | Homo sapiens Rac/Cdc42 guanine nucleotide exchange factor (GEF) 6 (ARHGEF6), mRNA [NM_004840]                 | 9459  |

|              |     |     |     |     |         |                                                                                                                 |       |
|--------------|-----|-----|-----|-----|---------|-----------------------------------------------------------------------------------------------------------------|-------|
| A_23_P417891 | 2.7 | 1.9 | 2.2 | 1.3 | ARHGEF7 | Homo sapiens Rho guanine nucleotide exchange factor (GEF) 7 (ARHGEF7), transcript variant 2, mRNA [NM_145735]   | 8874  |
| A_23_P321855 | 1.3 | 1.1 | 2.1 | 1.5 | ARHGEF7 | Homo sapiens Rho guanine nucleotide exchange factor (GEF) 7 (ARHGEF7), transcript variant 1, mRNA [NM_003899]   | 8874  |
| A_24_P254551 | 2.3 | 1.6 | 1.6 | 1.8 | ARHGEF9 | Homo sapiens Cdc42 guanine nucleotide exchange factor (GEF) 9 (ARHGEF9), transcript variant 1, mRNA [NM_015185] | 23229 |

|              |      |      |      |      |        |                                                                                                        |       |
|--------------|------|------|------|------|--------|--------------------------------------------------------------------------------------------------------|-------|
| A_24_P92952  | 2.0  | 4.9  | -1.1 | 1.4  | ARID1A | Homo sapiens AT rich interactive domain 1A (SWI-like) (ARID1A), transcript variant 1, mRNA [NM_006015] | 8289  |
| A_23_P88580  | -1.7 | -7.9 | -2.0 | -2.8 | ARID3B | Homo sapiens AT rich interactive domain 3B (BRIGHT-like) (ARID3B), mRNA [NM_006465]                    | 10620 |
| A_23_P143016 | 3.0  | 2.1  | 2.0  | 2.5  | ARID5A | Homo sapiens AT rich interactive domain 5A (MRF1-like) (ARID5A), mRNA [NM_212481]                      | 10865 |
| A_24_P929441 | -2.2 | -1.0 | 1.5  | 1.2  | ARID5A | Homo sapiens clone DNA128322 RFVG5814 (UNQ5814) mRNA, complete cds. [AY358167]                         | 10865 |

|              |      |      |      |      |        |                                                                                                         |        |
|--------------|------|------|------|------|--------|---------------------------------------------------------------------------------------------------------|--------|
| A_32_P18440  | 2.4  | 2.7  | 1.8  | 1.3  | ARID5B | Homo sapiens AT rich interactive domain 5B (MRF1-like) (ARID5B), transcript variant 1, mRNA [NM_032199] | 84159  |
| A_32_P68586  | -3.8 | -1.1 | -1.4 | 1.6  | ARL1   | Homo sapiens ADP-ribosylation factor-like 1 (ARL1), mRNA [NM_001177]                                    | 400    |
| A_32_P36101  | -5.0 | -2.2 | -3.6 | -2.0 | ARL1   | Homo sapiens ADP-ribosylation factor-like 1 (ARL1), mRNA [NM_001177]                                    | 400    |
| A_24_P378202 | 1.4  | 1.4  | -1.4 | -3.3 | ARL11  | Homo sapiens ADP-ribosylation factor-like 11 (ARL11), mRNA [NM_138450]                                  | 115761 |



|              |      |      |      |      |        |                                                                                                |        |
|--------------|------|------|------|------|--------|------------------------------------------------------------------------------------------------|--------|
| A_24_P328668 | 3.1  | -1.1 | 2.9  | 3.3  | ARL13B | Homo sapiens ADP-ribosylation factor-like 13B (ARL13B), transcript variant 1, mRNA [NM_182896] | 200894 |
| A_23_P92161  | -5.0 | 1.0  | 1.0  | 1.0  | ARL14  | Homo sapiens ADP-ribosylation factor-like 14 (ARL14), mRNA [NM_025047]                         | 80117  |
| A_24_P286935 | 13.3 | 11.9 | 9.1  | 8.1  | ARL3   | Homo sapiens ADP-ribosylation factor-like 3 (ARL3), mRNA [NM_004311]                           | 403    |
| A_23_P145761 | 2.3  | -1.1 | -1.3 | -1.5 | ARL4A  | Homo sapiens ADP-ribosylation factor-like 4A (ARL4A), transcript variant 1, mRNA [NM_005738]   | 10124  |

|              |      |      |      |      |         |                                                                                                                        |        |
|--------------|------|------|------|------|---------|------------------------------------------------------------------------------------------------------------------------|--------|
| A_24_P356218 | -2.1 | -2.7 | -3.1 | -1.2 | ARL6IP1 | Homo sapiens ADP-ribosylation factor-like 6 interacting protein 1 (ARL6IP1), mRNA [NM_015161]                          | 23204  |
| A_24_P287233 | 1.5  | 1.8  | -4.1 | 1.6  | ARL6IP4 | Homo sapiens ADP-ribosylation-like factor 6 interacting protein 4 (ARL6IP4), transcript variant 4, mRNA [NM_001002252] | 51329  |
| A_23_P415033 | 1.8  | 5.0  | 1.9  | 3.6  | ARL8A   | Homo sapiens ADP-ribosylation factor-like 8A (ARL8A), mRNA [NM_138795]                                                 | 127829 |
| A_24_P377065 | -1.4 | -2.6 | 1.3  | 1.1  | ARL8B   | Homo sapiens ADP-ribosylation factor-like 8B (ARL8B), mRNA [NM_018184]                                                 | 55207  |

|              |       |       |      |      |        |                                                                                                        |       |
|--------------|-------|-------|------|------|--------|--------------------------------------------------------------------------------------------------------|-------|
| A_32_P234827 | 1.0   | -1.0  | -1.1 | -2.3 | ARMC1  | Homo sapiens armadillo repeat containing 1 (ARMC1), mRNA [NM_018120]                                   | 55156 |
| A_32_P141418 | 2.9   | -1.0  | -1.1 | 1.0  | ARMC4  | Homo sapiens armadillo repeat containing 4 (ARMC4), mRNA [NM_018076]                                   | 55130 |
| A_23_P425750 | 1.5   | -18.3 | 1.5  | 1.3  | ARMC6  | Homo sapiens armadillo repeat containing 6 (ARMC6), transcript variant 2, mRNA [NM_033415]             | 93436 |
| A_24_P23411  | -13.4 | -1.0  | -1.1 | -1.0 | ARMCX3 | Homo sapiens armadillo repeat containing , X-linked 3 (ARMCX3), transcript variant 1, mRNA [NM_016607] | 51566 |

|              |      |      |      |      |        |                                                                                                            |           |
|--------------|------|------|------|------|--------|------------------------------------------------------------------------------------------------------------|-----------|
| A_24_P374375 | -2.3 | 1.1  | 1.0  | 1.1  | ARMCX4 | Homo sapiens armadillo repeat containing , X-linked 4 (ARMCX4), non-coding RNA [NR_028407]                 | 100131755 |
| A_23_P550    | 1.1  | -6.7 | 1.0  | 1.1  | ARNT   | Homo sapiens aryl hydrocarbon receptor nuclear translocator (ARNT), transcript variant 1, mRNA [NM_001668] | 405       |
| A_23_P83579  | -1.2 | -1.5 | -2.2 | -1.2 | ARNT2  | Homo sapiens aryl-hydrocarbon receptor nuclear translocator 2 (ARNT2), mRNA [NM_014862]                    | 9915      |

|              |      |      |      |      |        |                                                                                                                     |       |
|--------------|------|------|------|------|--------|---------------------------------------------------------------------------------------------------------------------|-------|
| A_32_P399546 | -3.9 | 1.1  | -1.0 | -1.0 | ARNTL2 | Homo sapiens aryl hydrocarbon receptor nuclear translocator-like 2 (ARNTL2), transcript variant 1, mRNA [NM_020183] | 56938 |
| A_23_P53345  | -1.7 | -1.7 | -1.7 | -3.0 | ARNTL2 | Homo sapiens aryl hydrocarbon receptor nuclear translocator-like 2 (ARNTL2), transcript variant 1, mRNA [NM_020183] | 56938 |
| A_23_P20196  | 2.0  | 1.1  | -2.5 | 1.1  | ARPC1B | Homo sapiens actin related protein 2/3 complex, subunit 1B, 41kDa (ARPC1B), mRNA [NM_005720]                        | 10095 |

|              |     |      |     |      |       |                                                                                                                  |       |
|--------------|-----|------|-----|------|-------|------------------------------------------------------------------------------------------------------------------|-------|
| A_23_P102122 | 1.4 | 1.1  | 1.8 | 4.8  | ARPC2 | Homo sapiens actin related protein 2/3 complex, subunit 2, 34kDa (ARPC2), transcript variant 1, mRNA [NM_152862] | 10109 |
| A_24_P167473 | 1.3 | -3.6 | 1.2 | -1.0 | ARPC3 | Homo sapiens actin related protein 2/3 complex, subunit 3, 21kDa (ARPC3), mRNA [NM_005719]                       | 10094 |
| A_24_P20383  | 1.8 | 2.6  | 2.2 | 5.6  | ARPC4 | Homo sapiens actin related protein 2/3 complex, subunit 4, 20kDa (ARPC4), transcript variant 1, mRNA [NM_005718] | 10093 |

|              |      |      |      |       |            |                                                                                                                 |           |
|--------------|------|------|------|-------|------------|-----------------------------------------------------------------------------------------------------------------|-----------|
| A_23_P391382 | -1.8 | 1.4  | -2.0 | 1.0   | ARPC4-TLL3 | Homo sapiens cDNA FLJ14048 fis, clone HEMBA10 06650, weakly similar to ARP2/3 COMPLEX 20 KD SUBUNIT. [AK024110] | 100526693 |
| A_23_P126803 | -1.8 | -2.1 | -1.5 | -1.0  | ARPC5      | Homo sapiens actin related protein 2/3 complex, subunit 5, 16kDa (ARPC5), mRNA [NM_005717]                      | 10092     |
| A_23_P121447 | 1.1  | 1.1  | -3.1 | 1.0   | ARPM1      | Homo sapiens actin related protein M1 (ARPM1), mRNA [NM_032487]                                                 | 84517     |
| A_24_P344976 | 1.0  | -1.0 | -1.1 | -15.5 | ARR3       | Homo sapiens arrestin 3, retinal (X-arrestin) (ARR3), mRNA [NM_004312]                                          | 407       |

|              |      |      |      |      |        |                                                                                               |       |
|--------------|------|------|------|------|--------|-----------------------------------------------------------------------------------------------|-------|
| A_24_P386622 | -1.1 | 2.2  | -1.1 | -1.1 | ARRB1  | Homo sapiens arrestin, beta 1 (ARRB1), transcript variant 1, mRNA [NM_004041]                 | 408   |
| A_23_P203702 | 1.1  | -4.5 | 1.2  | -1.1 | ARRB1  | Homo sapiens arrestin, beta 1 (ARRB1), transcript variant 1, mRNA [NM_004041]                 | 408   |
| A_24_P22976  | -4.1 | 1.2  | -1.1 | -1.0 | ARRDC2 | Homo sapiens arrestin domain containing 2 (ARRDC2), transcript variant 2, mRNA [NM_001025604] | 27106 |
| A_24_P274615 | 1.9  | 2.0  | 4.3  | 1.0  | ARRDC3 | Homo sapiens arrestin domain containing 3 (ARRDC3), mRNA [NM_020801]                          | 57561 |



|              |      |      |      |      |        |                                                                             |        |
|--------------|------|------|------|------|--------|-----------------------------------------------------------------------------|--------|
| A_24_P414553 | 1.1  | -1.0 | 1.1  | -9.9 | ARRDC3 | Homo sapiens arrestin domain containing 3 (ARRDC3), mRNA [NM_020801]        | 57561  |
| A_23_P339818 | 1.1  | -2.7 | -1.1 | -1.0 | ARRDC4 | Homo sapiens arrestin domain containing 4 (ARRDC4), mRNA [NM_183376]        | 91947  |
| A_32_P30271  | 1.5  | 1.5  | 2.4  | 1.5  | ARRDC5 | Homo sapiens arrestin domain containing 5 (ARRDC5), mRNA [NM_001080523]     | 645432 |
| A_23_P255436 | 1.7  | 2.5  | -1.0 | 1.2  | ARSA   | Homo sapiens arylsulfatase A (ARSA), transcript variant 1, mRNA [NM_000487] | 410    |
| A_23_P217712 | -2.6 | -1.2 | -1.1 | -2.0 | ARSD   | Homo sapiens arylsulfatase D (ARSD), mRNA [NM_001669]                       | 414    |

|              |      |      |      |      |      |                                                                             |       |
|--------------|------|------|------|------|------|-----------------------------------------------------------------------------|-------|
| A_23_P304304 | 5.2  | 3.0  | 2.6  | 5.7  | ARSF | Homo sapiens arylsulfatase F (ARSF), transcript variant 1, mRNA [NM_004042] | 416   |
| A_24_P339416 | 1.6  | 1.9  | -1.6 | -2.5 | ARSG | Homo sapiens arylsulfatase G (ARSG), mRNA [NM_014960]                       | 22901 |
| A_23_P87363  | 1.2  | -2.4 | 1.8  | 1.6  | ART1 | Homo sapiens ADP-ribosyltransferase 1 (ART1), mRNA [NM_004314]              | 417   |
| A_24_P251040 | 3.0  | 2.4  | -1.2 | 1.3  | ARTN | Homo sapiens artemin (ARTN), transcript variant 2, mRNA [NM_057091]         | 9048  |
| A_24_P144527 | -9.4 | 1.1  | 1.1  | -1.0 | ARV1 | Homo sapiens ARV1 homolog (S. cerevisiae) (ARV1), mRNA [NM_022786]          | 64801 |

|              |      |      |      |      |       |                                                                                                                     |       |
|--------------|------|------|------|------|-------|---------------------------------------------------------------------------------------------------------------------|-------|
| A_23_P135995 | 1.7  | 1.7  | -1.1 | -2.5 | ARV1  | Homo sapiens ARV1 homolog (S. cerevisiae) (ARV1), mRNA [NM_022786]                                                  | 64801 |
| A_23_P109393 | 2.8  | -1.1 | 2.1  | 1.0  | ARVCF | Homo sapiens armadillo repeat gene deleted in velocardio facial syndrome (ARVCF), mRNA [NM_001670]                  | 421   |
| A_23_P44831  | -1.2 | -1.2 | -1.7 | -3.6 | ASAP1 | Homo sapiens ArfGAP with SH3 domain, ankyrin repeat and PH domain 1 (ASAP1), transcript variant 1, mRNA [NM_018482] | 50807 |

|              |      |      |      |      |       |                                                                                                                     |        |
|--------------|------|------|------|------|-------|---------------------------------------------------------------------------------------------------------------------|--------|
| A_23_P114689 | -2.1 | -2.8 | -1.7 | -1.3 | ASAP3 | Homo sapiens ArfGAP with SH3 domain, ankyrin repeat and PH domain 3 (ASAP3), transcript variant 1, mRNA [NM_017707] | 55616  |
| A_23_P165360 | -1.8 | 2.3  | -1.4 | -1.2 | ASB1  | Homo sapiens ankyrin repeat and SOCS box containing 1 (ASB1), mRNA [NM_001040445]                                   | 51665  |
| A_23_P427634 | -1.1 | 3.0  | 3.2  | 1.4  | ASB10 | Homo sapiens ankyrin repeat and SOCS box containing 10 (ASB10), transcript variant 3, mRNA [NM_080871]              | 136371 |

|              |      |      |      |      |       |                                                                                                        |        |
|--------------|------|------|------|------|-------|--------------------------------------------------------------------------------------------------------|--------|
| A_23_P114259 | -1.0 | -3.6 | -1.0 | -1.0 | ASB11 | Homo sapiens ankyrin repeat and SOCS box containing 11 (ASB11), transcript variant 1, mRNA [NM_080873] | 140456 |
| A_23_P202510 | 1.2  | 2.9  | 1.2  | -1.1 | ASB13 | Homo sapiens ankyrin repeat and SOCS box containing 13 (ASB13), transcript variant 1, mRNA [NM_024701] | 79754  |
| A_23_P155265 | -4.9 | 1.9  | 1.5  | 1.0  | ASB14 | Homo sapiens ankyrin repeat and SOCS box containing 14 (ASB14), transcript variant 2, mRNA [NM_130387] | 142686 |

|              |     |       |     |      |       |                                                                                                      |       |
|--------------|-----|-------|-----|------|-------|------------------------------------------------------------------------------------------------------|-------|
| A_24_P56837  | 1.4 | 2.6   | 1.1 | -1.4 | ASB16 | Homo sapiens ankyrin repeat and SOCS box containing 16 (ASB16), mRNA [NM_080863]                     | 92591 |
| A_23_P205370 | 1.1 | -25.7 | 1.6 | 1.1  | ASB2  | Homo sapiens ankyrin repeat and SOCS box containing 2 (ASB2), transcript variant 2, mRNA [NM_016150] | 51676 |
| A_23_P56833  | 2.2 | 1.5   | 1.9 | 1.9  | ASB3  | Homo sapiens ankyrin repeat and SOCS box containing 3 (ASB3), transcript variant 1, mRNA [NM_016115] | 51130 |

|              |       |      |      |      |      |                                                                                                      |        |
|--------------|-------|------|------|------|------|------------------------------------------------------------------------------------------------------|--------|
| A_23_P144326 | 1.1   | 1.0  | 1.0  | -5.7 | ASB5 | Homo sapiens ankyrin repeat and SOCS box containing 5 (ASB5), mRNA [NM_080874]                       | 140458 |
| A_24_P155791 | -1.7  | -1.0 | -2.4 | -1.0 | ASB7 | Homo sapiens ankyrin repeat and SOCS box containing 7 (ASB7), transcript variant 1, mRNA [NM_024708] | 140460 |
| A_23_P117743 | -19.5 | 1.1  | 1.0  | 1.1  | ASB7 | Homo sapiens ankyrin repeat and SOCS box containing 7 (ASB7), transcript variant 1, mRNA [NM_024708] | 140460 |
| A_24_P643587 | -11.7 | -1.6 | -1.0 | -2.5 | ASB8 | Homo sapiens ankyrin repeat and SOCS box containing 8 (ASB8), mRNA [NM_024095]                       | 140461 |

|              |     |      |     |     |       |                                                                                                                 |        |
|--------------|-----|------|-----|-----|-------|-----------------------------------------------------------------------------------------------------------------|--------|
| A_23_P22200  | 2.5 | 1.2  | 1.4 | 1.3 | ASB8  | Homo sapiens ankyrin repeat and SOCS box containing 8 (ASB8), mRNA [NM_024095]                                  | 140461 |
| A_23_P1280   | 1.1 | -2.8 | 1.0 | 1.0 | ASCC1 | Homo sapiens activating signal cointegrator 1 complex subunit 1 (ASCC1), transcript variant 3, mRNA [NM_015947] | 51008  |
| A_23_P143643 | 1.8 | 2.1  | 1.9 | 1.2 | ASCC2 | Homo sapiens activating signal cointegrator 1 complex subunit 2 (ASCC2), transcript variant 1, mRNA [NM_032204] | 84164  |



|             |      |      |      |      |       |                                                                                                                 |       |
|-------------|------|------|------|------|-------|-----------------------------------------------------------------------------------------------------------------|-------|
| A_23_P30972 | -2.1 | -1.5 | -1.8 | -1.5 | ASCC3 | Homo sapiens activating signal cointegrator 1 complex subunit 3 (ASCC3), transcript variant 2, mRNA [NM_022091] | 10973 |
| A_23_P25305 | 1.5  | 2.0  | 2.5  | 1.4  | ASCL1 | Homo sapiens achaete-scute complex homolog 1 (Drosophila) (ASCL1), mRNA [NM_004316]                             | 429   |
| A_23_P2083  | 2.4  | 2.4  | -1.1 | -2.3 | ASCL3 | Homo sapiens achaete-scute complex homolog 3 (Drosophila) (ASCL3), mRNA [NM_020646]                             | 56676 |

|              |      |      |      |      |       |                                                                                                 |       |
|--------------|------|------|------|------|-------|-------------------------------------------------------------------------------------------------|-------|
| A_23_P119254 | 52.5 | 36.6 | 14.0 | 7.6  | ASF1B | Homo sapiens ASF1 anti-silencing function 1 homolog B (S. cerevisiae) (ASF1B), mRNA [NM_018154] | 55723 |
| A_24_P367666 | 1.0  | -1.6 | -4.1 | -4.1 | ASH1L | Homo sapiens ash1 (absent, small, or homeotic)-like (Drosophila) (ASH1L), mRNA [NM_018489]      | 55870 |
| A_23_P120629 | 2.4  | 1.6  | 2.9  | 2.0  | ASIP  | Homo sapiens agouti signaling protein (ASIP), mRNA [NM_001672]                                  | 434   |
| A_23_P26223  | -1.5 | 2.1  | -1.1 | 1.0  | ASL   | Homo sapiens argininosuccinate lyase (ASL), transcript variant 1, mRNA [NM_001024943]           | 435   |

|              |      |      |      |      |       |                                                                                                           |        |
|--------------|------|------|------|------|-------|-----------------------------------------------------------------------------------------------------------|--------|
| A_23_P255535 | 2.2  | 2.2  | 2.1  | 2.4  | ASMT  | Homo sapiens acetylserotonin O-methyltransferase (ASMT), transcript variant 2, mRNA [NM_004043]           | 438    |
| A_23_P159544 | 1.4  | 1.9  | -2.3 | 1.8  | ASMTL | Homo sapiens acetylserotonin O-methyltransferase-like (ASMTL), transcript variant 1, mRNA [NM_004192]     | 8623   |
| A_24_P602013 | 3.3  | 1.8  | 2.4  | 3.1  | ASPA  | aspartoacylase [Source:HGNC Symbol;Acc:756] [ENST00000263080]                                             | 443    |
| A_24_P690811 | -1.2 | -3.6 | -1.3 | -2.4 | ASPDH | Homo sapiens aspartate dehydrogenase domain containing (ASPDH), transcript variant 2, mRNA [NM_001024656] | 554235 |

|              |      |      |      |      |        |                                                                                        |        |
|--------------|------|------|------|------|--------|----------------------------------------------------------------------------------------|--------|
| A_23_P76743  | -1.8 | -1.1 | -2.1 | -2.5 | ASPG   | Homo sapiens asparaginase homolog (S. cerevisiae) (ASPG), mRNA [NM_001080464]          | 374569 |
| A_23_P216094 | 2.1  | -1.0 | -1.1 | -1.0 | ASPH   | Homo sapiens aspartate beta-hydroxylase (ASPH), transcript variant 1, mRNA [NM_004318] | 444    |
| A_24_P18105  | -2.4 | -7.7 | -2.4 | -2.4 | ASPH   | Homo sapiens aspartate beta-hydroxylase (ASPH), transcript variant 3, mRNA [NM_032466] | 444    |
| A_23_P170667 | -4.3 | -3.3 | -1.2 | -1.8 | ASPHD1 | Homo sapiens aspartate beta-hydroxylase domain containing 1 (ASPHD1), mRNA [NM_181718] | 253982 |

|              |      |      |      |      |        |                                                                                         |        |
|--------------|------|------|------|------|--------|-----------------------------------------------------------------------------------------|--------|
| A_23_P216429 | -2.1 | 1.0  | 1.1  | 1.0  | ASPN   | Homo sapiens asporin (ASPN), transcript variant 1, mRNA [NM_017680]                     | 54829  |
| A_23_P379864 | -3.3 | -1.1 | -1.2 | -1.1 | ASRGL1 | Homo sapiens asparaginase like 1 (ASRGL1), transcript variant 1, mRNA [NM_001083926]    | 80150  |
| A_23_P1936   | -3.4 | -1.7 | -1.1 | 1.0  | ASRGL1 | Homo sapiens asparaginase like 1 (ASRGL1), transcript variant 2, mRNA [NM_025080]       | 80150  |
| A_23_P102439 | 4.1  | 1.9  | 1.3  | -2.8 | ASTL   | Homo sapiens astacin-like metallo-endopeptidase (M12 family) (ASTL), mRNA [NM_00102036] | 431705 |

|              |       |       |       |       |       |                                                                                                       |        |
|--------------|-------|-------|-------|-------|-------|-------------------------------------------------------------------------------------------------------|--------|
| A_24_P83738  | -1.1  | 1.1   | -10.9 | -1.4  | ASTN2 | Homo sapiens astrotactin 2 (ASTN2), transcript variant 4, mRNA [NM_198188]                            | 23245  |
| A_32_P41021  | -10.2 | 1.0   | 1.0   | 1.0   | ASXL1 | Homo sapiens additional sex combs like 1 (Drosophila) (ASXL1), transcript variant 1, mRNA [NM_015338] | 171023 |
| A_24_P359771 | -13.0 | 1.5   | 1.3   | 1.1   | ASXL2 | additional sex combs like 2 (Drosophila) [Source:HGNC Symbol;Acc:23805] [ENST00000336112]             | 55252  |
| A_23_P210300 | -94.1 | -16.3 | -18.2 | -13.6 | ASXL2 | Homo sapiens additional sex combs like 2 (Drosophila) (ASXL2), mRNA [NM_018263]                       | 55252  |

|              |     |      |      |      |        |                                                                                                                              |       |
|--------------|-----|------|------|------|--------|------------------------------------------------------------------------------------------------------------------------------|-------|
| A_24_P329777 | 2.4 | 5.1  | 1.3  | 2.3  | ATAD1  | Homo sapiens ATPase family, AAA domain containing 1 (ATAD1), mRNA [NM_032810]                                                | 84896 |
| A_23_P74688  | 2.4 | 2.8  | -1.0 | 1.1  | ATAD3B | Homo sapiens ATPase family, AAA domain containing 3B (ATAD3B), nuclear gene encoding mitochondrial protein, mRNA [NM_031921] | 83858 |
| A_32_P353677 | 1.0 | -1.0 | -1.1 | -5.5 | ATAD3B | Homo sapiens TOB3 mRNA, complete cds. [AF343078]                                                                             | 83858 |

|              |      |      |      |      |        |                                                                                          |       |
|--------------|------|------|------|------|--------|------------------------------------------------------------------------------------------|-------|
| A_23_P302750 | 1.3  | 2.0  | 1.2  | 2.0  | ATAD3B | ATPase family, AAA domain containing 3B [Source:HGNC Symbol;Acc:24007] [ENST00000472194] | 83858 |
| A_24_P113144 | 1.1  | 1.1  | -2.4 | 1.0  | ATAD5  | Homo sapiens ATPase family, AAA domain containing 5 (ATAD5), mRNA [NM_024857]            | 79915 |
| A_23_P255750 | -1.1 | -3.1 | -2.2 | -1.1 | ATAD5  | Homo sapiens ATPase family, AAA domain containing 5 (ATAD5), mRNA [NM_024857]            | 79915 |



|              |      |      |      |      |       |                                                                                                |       |
|--------------|------|------|------|------|-------|------------------------------------------------------------------------------------------------|-------|
| A_23_P70509  | 2.8  | 2.6  | 2.8  | -1.1 | ATAT1 | Homo sapiens alpha tubulin acetyltransferase 1 (ATAT1), transcript variant 2, mRNA [NM_024909] | 79969 |
| A_24_P40094  | -1.3 | -1.3 | 1.1  | -2.4 | ATCAY | Homo sapiens ataxia, cerebellar, Cayman type (ATCAY), mRNA [NM_033064]                         | 85300 |
| A_23_P433063 | 3.2  | 5.5  | -1.2 | -3.7 | ATCAY | Homo sapiens ataxia, cerebellar, Cayman type (ATCAY), mRNA [NM_033064]                         | 85300 |
| A_23_P209879 | -1.1 | -5.4 | -1.3 | -1.3 | ATF2  | activating transcription factor 2 [Source:HGNC Symbol;Acc:784] [ENST00000542046]               | 1386  |

|              |      |      |      |      |       |                                                                                                     |       |
|--------------|------|------|------|------|-------|-----------------------------------------------------------------------------------------------------|-------|
| A_24_P128145 | -2.5 | -1.3 | -5.1 | -2.9 | ATF2  | Homo sapiens activating transcription factor 2 (ATF2), mRNA [NM_001880]                             | 1386  |
| A_24_P33895  | -2.8 | 1.0  | 1.0  | 1.1  | ATF3  | Homo sapiens activating transcription factor 3 (ATF3), transcript variant 4, mRNA [NM_001040619]    | 467   |
| A_23_P62907  | 1.1  | 1.9  | -1.2 | -2.0 | ATF6  | Homo sapiens activating transcription factor 6 (ATF6), mRNA [NM_007348]                             | 22926 |
| A_23_P59163  | 1.8  | 2.1  | 2.1  | 3.4  | ATF6B | Homo sapiens activating transcription factor 6 beta (ATF6B), transcript variant 1, mRNA [NM_004381] | 1388  |

|              |     |      |      |     |        |                                                                                                                 |       |
|--------------|-----|------|------|-----|--------|-----------------------------------------------------------------------------------------------------------------|-------|
| A_24_P419109 | 2.1 | -1.1 | 1.1  | 1.4 | ATF6B  | Homo sapiens activating transcription factor 6 beta (ATF6B), transcript variant 1, mRNA [NM_004381]             | 1388  |
| A_23_P112950 | 5.4 | 6.9  | 4.4  | 2.5 | ATF7IP | Homo sapiens activating transcription factor 7 interacting protein (ATF7IP), mRNA [NM_018179]                   | 55729 |
| A_23_P92824  | 1.2 | -1.1 | -2.1 | 1.3 | ATG10  | Homo sapiens ATG10 autophagy related 10 homolog (S. cerevisiae) (ATG10), transcript variant 2, mRNA [NM_031482] | 83734 |

|              |      |      |      |     |         |                                                                                                                 |       |
|--------------|------|------|------|-----|---------|-----------------------------------------------------------------------------------------------------------------|-------|
| A_23_P95292  | 2.4  | -1.7 | 3.3  | 2.2 | ATG13   | Homo sapiens ATG13 autophagy related 13 homolog (S. cerevisiae) (ATG13), transcript variant 2, mRNA [NM_014741] | 9776  |
| A_23_P309989 | 1.5  | 4.2  | 2.2  | 2.4 | ATG14   | Homo sapiens ATG14 autophagy related 14 homolog (S. cerevisiae) (ATG14), mRNA [NM_014924]                       | 22863 |
| A_23_P315378 | -2.6 | 1.0  | -1.0 | 1.0 | ATG16L1 | ATG16 autophagy related 16-like 1 (S. cerevisiae) [Source:HGNC Symbol;Acc:21498] [ENST0000472242]               | 55054 |

|              |      |      |      |      |         |                                                                                                                                   |       |
|--------------|------|------|------|------|---------|-----------------------------------------------------------------------------------------------------------------------------------|-------|
| A_23_P36305  | -1.2 | -2.0 | -2.0 | -1.3 | ATG16L2 | Homo sapiens ATG16 autophagy related 16-like 2 (S. cerevisiae) (ATG16L2), mRNA [NM_033388]                                        | 89849 |
| A_24_P196382 | 1.2  | -2.1 | 1.4  | 1.5  | ATG3    | Homo sapiens ATG3 autophagy related 3 homolog (S. cerevisiae), mRNA (cDNA clone MGC:3478 IMAGE:3633903), complete cds. [BC002830] | 64422 |
| A_23_P212706 | 1.1  | -2.6 | -1.4 | 1.5  | ATG3    | Homo sapiens ATG3 autophagy related 3 homolog (S. cerevisiae) (ATG3), mRNA [NM_022488]                                            | 64422 |

|              |      |       |      |      |       |                                                                                                                 |        |
|--------------|------|-------|------|------|-------|-----------------------------------------------------------------------------------------------------------------|--------|
| A_23_P217367 | -1.9 | -17.8 | 1.2  | 1.1  | ATG4A | Homo sapiens ATG4 autophagy related 4 homolog A (S. cerevisiae) (ATG4A), transcript variant 1, mRNA [NM_052936] | 115201 |
| A_24_P182764 | 1.0  | -2.2  | 1.0  | 1.0  | ATG4B | Homo sapiens ATG4 autophagy related 4 homolog B (S. cerevisiae) (ATG4B), transcript variant 2, mRNA [NM_178326] | 23192  |
| A_23_P9903   | -1.0 | -1.0  | -1.1 | -7.1 | ATG4B | Homo sapiens ATG4 autophagy related 4 homolog B (S. cerevisiae) (ATG4B), transcript variant 2, mRNA [NM_178326] | 23192  |

|              |      |      |      |      |       |                                                                                                                 |       |
|--------------|------|------|------|------|-------|-----------------------------------------------------------------------------------------------------------------|-------|
| A_24_P182539 | -3.5 | 1.3  | 1.2  | 1.0  | ATG4C | Homo sapiens ATG4 autophagy related 4 homolog C (S. cerevisiae) (ATG4C), transcript variant 1, mRNA [NM_032852] | 84938 |
| A_24_P175059 | 16.1 | 16.0 | 15.2 | 14.1 | ATG5  | Homo sapiens ATG5 autophagy related 5 homolog (S. cerevisiae) (ATG5), mRNA [NM_004849]                          | 9474  |
| A_23_P143987 | -1.6 | 1.5  | 2.3  | 1.4  | ATG7  | Homo sapiens ATG7 autophagy related 7 homolog (S. cerevisiae) (ATG7), transcript variant 1, mRNA [NM_006395]    | 10533 |

|              |      |      |      |      |       |                                                                                                              |        |
|--------------|------|------|------|------|-------|--------------------------------------------------------------------------------------------------------------|--------|
| A_24_P944827 | -1.0 | 1.7  | -1.4 | -2.8 | ATG7  | Homo sapiens ATG7 autophagy related 7 homolog (S. cerevisiae) (ATG7), transcript variant 1, mRNA [NM_006395] | 10533  |
| A_32_P379379 | -1.5 | -1.5 | -2.3 | -1.9 | ATG9B | Homo sapiens ATG9 autophagy related 9 homolog B (S. cerevisiae) (ATG9B), mRNA [NM_173681]                    | 285973 |
| A_23_P98686  | 2.6  | 4.8  | 2.8  | -1.1 | ATHL1 | Homo sapiens ATH1, acid trehalase-like 1 (yeast) (ATHL1), mRNA [NM_025092]                                   | 80162  |



|              |      |      |      |      |      |                                                                                                                          |       |
|--------------|------|------|------|------|------|--------------------------------------------------------------------------------------------------------------------------|-------|
| A_23_P68087  | -3.3 | -2.3 | -1.2 | -1.2 | ATIC | Homo sapiens 5-aminoimidazole-4-carboxamide ribonucleotide formyltransferase/IMP cyclohydrolase (ATIC), mRNA [NM_004044] | 471   |
| A_23_P88351  | 2.1  | 2.1  | 2.2  | -4.4 | ATL1 | Homo sapiens atlastin GTPase 1 (ATL1), transcript variant 2, mRNA [NM_181598]                                            | 51062 |
| A_23_P105028 | 1.4  | -3.4 | 1.0  | 1.1  | ATL3 | Homo sapiens atlastin GTPase 3 (ATL3), mRNA [NM_015459]                                                                  | 25923 |
| A_23_P13885  | -1.9 | -1.6 | -2.1 | -2.1 | ATN1 | Homo sapiens atrophin 1 (ATN1), transcript variant 1, mRNA [NM_001007026]                                                | 1822  |

|              |      |      |      |      |        |                                                                                   |        |
|--------------|------|------|------|------|--------|-----------------------------------------------------------------------------------|--------|
| A_23_P332246 | -4.9 | -1.0 | -1.1 | -1.1 | ATOH1  | Homo sapiens atonal homolog 1 (Drosophila) (ATOH1), mRNA [NM_005172]              | 474    |
| A_23_P378514 | -1.0 | -1.3 | -3.9 | -2.3 | ATOH7  | Homo sapiens atonal homolog 7 (Drosophila) (ATOH7), mRNA [NM_145178]              | 220202 |
| A_23_P144877 | -1.0 | 4.9  | -1.5 | -1.1 | ATOX1  | Homo sapiens ATX1 antioxidant protein 1 homolog (yeast) (ATOX1), mRNA [NM_004045] | 475    |
| A_23_P65659  | 3.7  | 2.0  | 2.2  | 1.8  | ATP10A | Homo sapiens ATPase, class V, type 10A (ATP10A), mRNA [NM_024490]                 | 57194  |

|              |      |      |      |      |        |                                                                                          |       |
|--------------|------|------|------|------|--------|------------------------------------------------------------------------------------------|-------|
| A_23_P311901 | 1.1  | -1.2 | -1.1 | -2.1 | ATP10B | Homo sapiens ATPase, class V, type 10B (ATP10B), mRNA [NM_025153]                        | 23120 |
| A_24_P161973 | -1.3 | 1.0  | 1.0  | -2.9 | ATP11A | Homo sapiens ATPase, class VI, type 11A (ATP11A), transcript variant 1, mRNA [NM_015205] | 23250 |
| A_24_P59403  | 1.0  | -3.4 | -1.0 | 1.1  | ATP11A | Homo sapiens ATPase, class VI, type 11A (ATP11A), transcript variant 1, mRNA [NM_015205] | 23250 |
| A_23_P212522 | -1.1 | -1.2 | -3.1 | -4.1 | ATP11B | Homo sapiens ATPase, class VI, type 11B (ATP11B), mRNA [NM_014616]                       | 23200 |

|              |      |      |     |      |        |                                                                                          |        |
|--------------|------|------|-----|------|--------|------------------------------------------------------------------------------------------|--------|
| A_24_P157415 | -3.3 | -1.2 | 1.4 | -1.3 | ATP11B | Homo sapiens ATPase, class VI, type 11B (ATP11B), mRNA [NM_014616]                       | 23200  |
| A_24_P340428 | 1.1  | 1.1  | 1.0 | -6.7 | ATP11B | Homo sapiens ATPase, class VI, type 11B (ATP11B), mRNA [NM_014616]                       | 23200  |
| A_24_P152310 | -7.0 | -1.3 | 1.1 | -1.1 | ATP11B | Homo sapiens ATPase, class VI, type 11B (ATP11B), mRNA [NM_014616]                       | 23200  |
| A_24_P399942 | 1.5  | 2.4  | 1.2 | 4.0  | ATP11C | Homo sapiens ATPase, class VI, type 11C (ATP11C), transcript variant 1, mRNA [NM_173694] | 286410 |

|              |      |       |      |      |         |                                                                                                                                                  |        |
|--------------|------|-------|------|------|---------|--------------------------------------------------------------------------------------------------------------------------------------------------|--------|
| A_23_P251730 | 1.5  | 1.9   | -2.4 | 1.4  | ATP11C  | Homo sapiens ATPase, class VI, type 11C (ATP11C), transcript variant 2, mRNA [NM_001010986]                                                      | 286410 |
| A_23_P87982  | 3.0  | 3.4   | 2.3  | 2.9  | ATP12A  | Homo sapiens ATPase, H <sup>+</sup> /K <sup>+</sup> transporting, nongastric, alpha polypeptide (ATP12A), transcript variant 2, mRNA [NM_001676] | 479    |
| A_23_P12423  | -1.5 | -1.7  | -1.5 | -2.5 | ATP13A2 | Homo sapiens ATPase type 13A2 (ATP13A2), transcript variant 1, mRNA [NM_022089]                                                                  | 23400  |
| A_23_P29394  | -1.1 | -11.6 | -1.2 | -1.7 | ATP13A4 | Homo sapiens ATPase type 13A4 (ATP13A4), mRNA [NM_032279]                                                                                        | 84239  |

|              |      |      |      |      |          |                                                                                                                |       |
|--------------|------|------|------|------|----------|----------------------------------------------------------------------------------------------------------------|-------|
| A_23_P149695 | -1.3 | -1.0 | -1.6 | -4.5 | ATP1A1OS | Homo sapiens ATP1A1 opposite strand (ATP1A1OS), transcript variant 3, non-coding RNA [NR_024126]               | 84852 |
| A_23_P27472  | -4.5 | -3.7 | -2.9 | -2.6 | ATP1A3   | Homo sapiens ATPase, Na+/K+ transporting, alpha 3 polypeptide (ATP1A3), mRNA [NM_152296]                       | 478   |
| A_23_P160177 | 2.3  | 2.7  | -1.0 | 1.3  | ATP1A4   | Homo sapiens ATPase, Na+/K+ transporting, alpha 4 polypeptide (ATP1A4), transcript variant 1, mRNA [NM_144699] | 480   |

|              |      |      |      |      |        |                                                                                                                        |       |
|--------------|------|------|------|------|--------|------------------------------------------------------------------------------------------------------------------------|-------|
| A_24_P31275  | 2.5  | -1.1 | 1.8  | 1.7  | ATP1B2 | Homo sapiens ATPase, Na+/K+ transporting, beta 2 polypeptide (ATP1B2), mRNA [NM_001678]                                | 482   |
| A_23_P217430 | 1.0  | -1.0 | -3.5 | -1.1 | ATP1B4 | Homo sapiens ATPase, Na+/K+ transporting, beta 4 polypeptide (ATP1B4), transcript variant 1, mRNA [NM_001142447]       | 23439 |
| A_23_P72462  | -2.8 | 1.2  | 1.1  | 1.4  | ATP2A1 | Homo sapiens ATPase, Ca++ transporting, cardiac muscle, fast twitch 1 (ATP2A1), transcript variant b, mRNA [NM_173201] | 487   |

|              |      |      |      |      |        |                                                                                                            |     |
|--------------|------|------|------|------|--------|------------------------------------------------------------------------------------------------------------|-----|
| A_24_P202319 | -1.3 | -1.8 | -1.2 | -2.6 | ATP2A3 | Homo sapiens ATPase, Ca++ transporting, ubiquitous (ATP2A3), transcript variant 7, mRNA [NM_174958]        | 489 |
| A_23_P207632 | -6.7 | -1.0 | -1.0 | -1.0 | ATP2A3 | Homo sapiens ATPase, Ca++ transporting, ubiquitous (ATP2A3), transcript variant 5, mRNA [NM_174953]        | 489 |
| A_23_P128319 | -1.4 | 1.1  | -2.0 | 1.5  | ATP2B1 | Homo sapiens ATPase, Ca++ transporting, plasma membrane 1 (ATP2B1), transcript variant 2, mRNA [NM_001682] | 490 |



|              |      |      |      |      |        |                                                                                                                        |      |
|--------------|------|------|------|------|--------|------------------------------------------------------------------------------------------------------------------------|------|
| A_23_P337642 | -4.7 | -2.1 | -1.2 | -1.3 | ATP2B3 | Homo sapiens ATPase, Ca <sup>++</sup> transporting, plasma membrane 3 (ATP2B3), transcript variant 1, mRNA [NM_021949] | 492  |
| A_23_P11841  | -1.3 | -1.3 | -2.1 | 1.3  | ATP2B4 | Homo sapiens ATPase, Ca <sup>++</sup> transporting, plasma membrane 4 (ATP2B4), transcript variant 2, mRNA [NM_001684] | 493  |
| A_23_P117992 | -4.3 | -1.8 | -1.1 | -2.3 | ATP2C2 | Homo sapiens ATPase, Ca <sup>++</sup> transporting, type 2C, member 2 (ATP2C2), mRNA [NM_014861]                       | 9914 |

|              |     |      |      |     |        |                                                                                                                                                                                                       |     |
|--------------|-----|------|------|-----|--------|-------------------------------------------------------------------------------------------------------------------------------------------------------------------------------------------------------|-----|
| A_24_P245358 | 1.3 | -2.7 | -1.3 | 1.6 | ATP5A1 | Homo sapiens ATP synthase, H+ transporting, mitochondrial F1 complex, alpha subunit 1, cardiac muscle (ATP5A1), nuclear gene encoding mitochondrial protein, transcript variant 1, mRNA [NM_00101937] | 498 |
|--------------|-----|------|------|-----|--------|-------------------------------------------------------------------------------------------------------------------------------------------------------------------------------------------------------|-----|

|             |       |     |     |     |        |                                                                                                                                                                                                     |     |
|-------------|-------|-----|-----|-----|--------|-----------------------------------------------------------------------------------------------------------------------------------------------------------------------------------------------------|-----|
| A_23_P33216 | 3.3   | 3.2 | 5.2 | 5.0 | ATP5B  | Homo sapiens ATP synthase, H <sup>+</sup> transporting, mitochondrial F1 complex, beta polypeptide (ATP5B), nuclear gene encoding mitochondrial protein, mRNA [NM_001686]                           | 506 |
| A_23_P63655 | -11.9 | 1.1 | 1.1 | 1.0 | ATP5C1 | Homo sapiens ATP synthase, H <sup>+</sup> transporting, mitochondrial F1 complex, gamma polypeptide 1 (ATP5C1), nuclear gene encoding mitochondrial protein, transcript variant 2, mRNA [NM_005174] | 509 |

|              |     |     |     |      |       |                                                                                                                                                                                                 |     |
|--------------|-----|-----|-----|------|-------|-------------------------------------------------------------------------------------------------------------------------------------------------------------------------------------------------|-----|
| A_24_P168456 | 1.1 | 1.5 | 2.2 | 1.0  | ATP5D | Homo sapiens ATP synthase, H <sup>+</sup> transporting, mitochondrial F1 complex, delta subunit (ATP5D), nuclear gene encoding mitochondrial protein, transcript variant 2, mRNA [NM_001001975] | 513 |
| A_32_P123771 | 1.2 | 1.2 | 1.1 | -2.5 | ATP5E | Homo sapiens ATP synthase, H <sup>+</sup> transporting, mitochondrial F1 complex, epsilon subunit (ATP5E), nuclear gene encoding mitochondrial protein, mRNA [NM_006886]                        | 514 |

|              |      |      |     |     |        |                                                                                                                                |     |
|--------------|------|------|-----|-----|--------|--------------------------------------------------------------------------------------------------------------------------------|-----|
| A_24_P659099 | 1.1  | 1.1  | 1.0 | 3.0 | ATP5F1 | ATP synthase, H+ transporting, mitochondrial Fo complex, subunit B1 [Source:HGNC Symbol;Acc:840] [ENST00000369722]             | 515 |
| A_24_P315326 | -5.9 | -1.2 | 1.1 | 1.1 | ATP5G2 | ATP synthase, H+ transporting, mitochondrial Fo complex, subunit C2 (subunit 9) [Source:HGNC Symbol;Acc:842] [ENST00000550241] | 517 |

|              |     |     |      |     |        |                                                                                                                                                                                               |     |
|--------------|-----|-----|------|-----|--------|-----------------------------------------------------------------------------------------------------------------------------------------------------------------------------------------------|-----|
| A_24_P174346 | 1.1 | 1.2 | -2.1 | 1.1 | ATP5G3 | Homo sapiens ATP synthase, H+ transporting, mitochondrial Fo complex, subunit C3 (subunit 9) (ATP5G3), nuclear gene encoding mitochondrial protein, transcript variant 3, mRNA [NM_001002258] | 518 |
|--------------|-----|-----|------|-----|--------|-----------------------------------------------------------------------------------------------------------------------------------------------------------------------------------------------|-----|

|              |     |      |     |     |       |                                                                                                                                                                              |       |
|--------------|-----|------|-----|-----|-------|------------------------------------------------------------------------------------------------------------------------------------------------------------------------------|-------|
| A_23_P77818  | 2.5 | -1.0 | 2.6 | 2.5 | ATP5H | Homo sapiens ATP synthase, H+ transporting, mitochondrial Fo complex, subunit d (ATP5H), nuclear gene encoding mitochondrial protein, transcript variant 1, mRNA [NM_006356] | 10476 |
| A_24_P302998 | 3.0 | 2.6  | 2.4 | 1.8 | ATP5I | Homo sapiens ATP synthase, H+ transporting, mitochondrial Fo complex, subunit E (ATP5I), nuclear gene encoding mitochondrial protein, transcript variant 1, mRNA [NM_007100] | 521   |

|              |      |      |      |      |        |                                                                                                                                                                                           |       |
|--------------|------|------|------|------|--------|-------------------------------------------------------------------------------------------------------------------------------------------------------------------------------------------|-------|
| A_23_P215832 | -1.0 | -1.1 | -2.6 | -1.0 | ATP5J2 | Homo sapiens ATP synthase, H+ transporting, mitochondrial Fo complex, subunit F2 (ATP5J2), nuclear gene encoding mitochondrial protein, transcript variant 1, mRNA [NM_004889]            | 9551  |
| A_24_P118231 | -2.0 | -2.0 | -2.0 | -2.1 | ATP5S  | Homo sapiens ATP synthase, H+ transporting, mitochondrial Fo complex, subunit s (factor B) (ATP5S), nuclear gene encoding mitochondrial protein, transcript variant 1, mRNA [NM_00103803] | 27109 |



|              |      |      |      |      |          |                                                                                                               |       |
|--------------|------|------|------|------|----------|---------------------------------------------------------------------------------------------------------------|-------|
| A_23_P107795 | 3.3  | 3.1  | 2.8  | 2.9  | ATP5SL   | Homo sapiens ATP5S-like (ATP5SL), transcript variant 4, mRNA [NM_018035]                                      | 55101 |
| A_24_P74753  | -2.0 | -4.9 | -2.0 | -2.0 | ATP6AP1  | Homo sapiens ATPase, H <sup>+</sup> transporting, lysosomal accessory protein 1 (ATP6AP1), mRNA [NM_001183]   | 537   |
| A_23_P54636  | 2.5  | 2.9  | 2.6  | -1.2 | ATP6VOD1 | Homo sapiens ATPase, H <sup>+</sup> transporting, lysosomal 38kDa, V0 subunit d1 (ATP6VOD1), mRNA [NM_004691] | 9114  |

|              |     |     |      |      |          |                                                                                                      |        |
|--------------|-----|-----|------|------|----------|------------------------------------------------------------------------------------------------------|--------|
| A_23_P146146 | 1.9 | 1.9 | 2.2  | -1.0 | ATP6V0D2 | Homo sapiens ATPase, H+ transporting, lysosomal 38kDa, V0 subunit d2 (ATP6V0D2), mRNA [NM_152565]    | 245972 |
| A_23_P142815 | 1.0 | 1.0 | 1.0  | 3.8  | ATP6V1B1 | Homo sapiens ATPase, H+ transporting, lysosomal 56/58kDa, V1 subunit B1 (ATP6V1B1), mRNA [NM_001692] | 525    |
| A_23_P146058 | 1.0 | 1.0 | -3.5 | -2.5 | ATP6V1C1 | Homo sapiens ATPase, H+ transporting, lysosomal 42kDa, V1 subunit C1 (ATP6V1C1), mRNA [NM_001695]    | 528    |

|              |      |      |      |      |          |                                                                                                                            |        |
|--------------|------|------|------|------|----------|----------------------------------------------------------------------------------------------------------------------------|--------|
| A_23_P250914 | -1.1 | 1.1  | 1.6  | 2.6  | ATP6V1C2 | Homo sapiens ATPase, H+ transporting, lysosomal 42kDa, V1 subunit C2 (ATP6V1C2), transcript variant 1, mRNA [NM_001039362] | 245973 |
| A_23_P143047 | 1.0  | -1.0 | -1.1 | 2.1  | ATP6V1E2 | Homo sapiens ATPase, H+ transporting, lysosomal 31kDa, V1 subunit E2 (ATP6V1E2), mRNA [NM_080653]                          | 90423  |
| A_23_P500410 | 1.1  | -1.2 | -2.8 | -2.6 | ATP6V1G2 | Homo sapiens ATPase, H+ transporting, lysosomal 13kDa, V1 subunit G2 (ATP6V1G2), transcript variant 1, mRNA [NM_130463]    | 534    |

|              |      |     |      |      |          |                                                                                                                          |        |
|--------------|------|-----|------|------|----------|--------------------------------------------------------------------------------------------------------------------------|--------|
| A_23_P23797  | -3.0 | 1.0 | -1.4 | 1.0  | ATP6V1G3 | Homo sapiens ATPase, H+ transporting, lysosomal 13kDa, V1 subunit G3 (ATP6V1G3), transcript variant 2, mRNA [NM_133326]  | 127124 |
| A_24_P363679 | 1.5  | 2.7 | 2.4  | 2.6  | ATP6V1H  | Homo sapiens ATPase, H+ transporting, lysosomal 50/57kDa, V1 subunit H (ATP6V1H), transcript variant 1, mRNA [NM_015941] | 51606  |
| A_23_P205228 | 1.0  | 1.0 | 2.4  | -1.0 | ATP7B    | Homo sapiens ATPase, Cu++ transporting, beta polypeptide (ATP7B), transcript variant 1, mRNA [NM_000053]                 | 540    |

|              |      |      |      |      |        |                                                                                                           |       |
|--------------|------|------|------|------|--------|-----------------------------------------------------------------------------------------------------------|-------|
| A_23_P258612 | -1.0 | -1.1 | -1.1 | 2.6  | ATP8A2 | Homo sapiens ATPase, aminophospholipid transporter, class I, type 8A, member 2 (ATP8A2), mRNA [NM_016529] | 51761 |
| A_32_P185229 | -1.0 | -1.0 | 3.3  | 1.3  | ATP8B2 | Homo sapiens ATPase, class I, type 8B, member 2 (ATP8B2), transcript variant 1, mRNA [NM_020452]          | 57198 |
| A_24_P366749 | -1.1 | -1.1 | -5.8 | -2.6 | ATP8B2 | Homo sapiens ATPase, class I, type 8B, member 2 (ATP8B2), transcript variant 2, mRNA [NM_001005855]       | 57198 |

|              |      |      |       |      |         |                                                                                                                                 |        |
|--------------|------|------|-------|------|---------|---------------------------------------------------------------------------------------------------------------------------------|--------|
| A_23_P79108  | 1.8  | -1.9 | 1.8   | 2.5  | ATP8B3  | Homo sapiens ATPase, aminophospholipid transporter, class I, type 8B, member 3 (ATP8B3), transcript variant 1, mRNA [NM_138813] | 148229 |
| A_24_P358245 | 2.0  | -3.5 | -1.5  | 1.0  | ATP8B5P | Homo sapiens ATPase, class I, type 8B, member 5, pseudogene (ATP8B5P), transcript variant 2, non-coding RNA [NR_003582]         | 158381 |
| A_23_P380614 | -4.3 | -4.4 | -10.3 | -5.6 | ATP9A   | Homo sapiens ATPase, class II, type 9A (ATP9A), mRNA [NM_006045]                                                                | 10079  |

|              |      |      |      |      |            |                                                                                                                                                                    |        |
|--------------|------|------|------|------|------------|--------------------------------------------------------------------------------------------------------------------------------------------------------------------|--------|
| A_23_P10497  | -1.3 | -2.2 | -1.1 | -1.1 | ATP9B      | Homo sapiens ATPase, class II, type 9B (ATP9B), mRNA [NM_198531]                                                                                                   | 374868 |
| A_24_P229199 | 2.0  | 1.5  | 2.0  | -1.0 | ATPAF1     | Homo sapiens ATP synthase mitochondrial F1 complex assembly factor 1 (ATPAF1), nuclear gene encoding mitochondrial protein, transcript variant 1, mRNA [NM_022745] | 64756  |
| A_32_P97862  | -1.3 | -1.3 | -1.6 | -6.9 | ATPAF1-AS1 | Homo sapiens ATPAF1 antisense RNA 1 (non-protein coding) (ATPAF1-AS1), mRNA [NM_001145474]                                                                         | 374973 |

|              |      |      |      |      |        |                                                                                      |       |
|--------------|------|------|------|------|--------|--------------------------------------------------------------------------------------|-------|
| A_24_P56557  | 1.0  | 1.0  | 2.2  | -1.0 | ATPBD4 | Homo sapiens ATP binding domain 4 (ATPBD4), transcript variant 1, mRNA [NM_080650]   | 89978 |
| A_23_P77135  | -3.1 | -2.5 | -1.4 | -1.4 | ATPBD4 | Homo sapiens ATP binding domain 4 (ATPBD4), transcript variant 1, mRNA [NM_080650]   | 89978 |
| A_23_P501770 | 1.1  | 1.1  | -2.2 | 1.0  | ATRIP  | Homo sapiens ATR interacting protein (ATRIP), transcript variant 2, mRNA [NM_032166] | 84126 |
| A_23_P388379 | 1.0  | -1.0 | -2.1 | 1.0  | ATRNL1 | Homo sapiens attractin-like 1 (ATRNL1), mRNA [NM_207303]                             | 26033 |



|              |      |     |      |      |      |                                                                                                                                    |     |
|--------------|------|-----|------|------|------|------------------------------------------------------------------------------------------------------------------------------------|-----|
| A_23_P136874 | -4.1 | 1.6 | -1.5 | -3.6 | ATRX | Homo sapiens alpha thalassaemia/mental retardation syndrome X-linked (ATRX), transcript variant 1, mRNA [NM_000489]                | 546 |
| A_24_P128041 | 1.6  | 1.5 | -4.0 | 1.5  | ATRX | Homo sapiens alpha thalassaemia/mental retardation syndrome X-linked (RAD54 homolog, S. cerevisiae) mRNA, complete cds. [BT007188] | 546 |
| A_24_P348660 | 3.4  | 3.2 | 2.2  | -1.2 | ATRX | Homo sapiens alpha thalassaemia/mental retardation syndrome X-linked (ATRX), transcript variant 1, mRNA [NM_000489]                | 546 |

|              |       |      |      |     |          |                                                                                |        |
|--------------|-------|------|------|-----|----------|--------------------------------------------------------------------------------|--------|
| A_32_P179740 | -13.4 | 1.1  | 1.4  | 1.1 | ATXN7L1  | Homo sapiens ataxin 7-like 1 (ATXN7L1), transcript variant 1, mRNA [NM_020725] | 222255 |
| A_24_P6790   | 1.8   | 4.1  | 1.0  | 6.6 | ATXN7L1  | Homo sapiens ataxin 7-like 1 (ATXN7L1), transcript variant 1, mRNA [NM_020725] | 222255 |
| A_23_P317207 | 3.8   | 4.4  | 1.0  | 3.9 | ATXN7L2  | Homo sapiens ataxin 7-like 2 (ATXN7L2), mRNA [NM_153340]                       | 127002 |
| A_24_P263956 | -1.0  | -1.0 | -1.1 | 2.0 | ATXN7L3B | Homo sapiens ataxin 7-like 3B (ATXN7L3B), mRNA [NM_001136262]                  | 552889 |
| A_23_P131866 | 2.9   | -1.5 | 2.3  | 2.3 | AURKA    | Homo sapiens aurora kinase A (AURKA), transcript variant 1, mRNA [NM_198433]   | 6790   |

|              |      |      |       |      |       |                                                                                         |       |
|--------------|------|------|-------|------|-------|-----------------------------------------------------------------------------------------|-------|
| A_23_P130182 | 1.1  | 1.0  | -80.8 | 1.5  | AURKB | Homo sapiens aurora kinase B (AURKB), mRNA [NM_004217]                                  | 9212  |
| A_24_P419087 | -3.8 | 1.2  | -1.6  | -1.0 | AVIL  | Homo sapiens advillin (AVIL), mRNA [NM_006576]                                          | 10677 |
| A_24_P55356  | 1.0  | -2.7 | -1.0  | -1.0 | AVL9  | Homo sapiens mRNA for KIAA0241 gene, partial cds. [D87682]                              | 23080 |
| A_24_P272967 | -2.9 | -1.1 | -1.2  | -1.3 | AVL9  | Homo sapiens AVL9 homolog (S. cerevisiae) (AVL9), mRNA [NM_015060]                      | 23080 |
| A_23_P208389 | -1.9 | 2.7  | 1.5   | 1.8  | AXL   | Homo sapiens AXL receptor tyrosine kinase (AXL), transcript variant 1, mRNA [NM_021913] | 558   |

|              |      |      |      |      |      |                                                                                     |       |
|--------------|------|------|------|------|------|-------------------------------------------------------------------------------------|-------|
| A_24_P66522  | -2.2 | -2.2 | -2.3 | -1.7 | AZI1 | Homo sapiens 5-azacytidine induced 1 (AZI1), transcript variant 1, mRNA [NM_014984] | 22994 |
| A_23_P319270 | 1.7  | 1.4  | -1.1 | 3.3  | AZI1 | Homo sapiens 5-azacytidine induced 1 (AZI1), transcript variant 1, mRNA [NM_014984] | 22994 |
| A_24_P51805  | -1.3 | -1.6 | -2.1 | -1.7 | AZI2 | Homo sapiens 5-azacytidine induced 2 (AZI2), transcript variant 1, mRNA [NM_022461] | 64343 |
| A_23_P153741 | -2.0 | 1.0  | 1.0  | -1.5 | AZU1 | Homo sapiens azurocidin 1 (AZU1), mRNA [NM_001700]                                  | 566   |

|              |      |      |       |      |          |                                                                                                                                          |        |
|--------------|------|------|-------|------|----------|------------------------------------------------------------------------------------------------------------------------------------------|--------|
| A_24_P88870  | -1.4 | -2.2 | -1.5  | -2.3 | B3GALNT1 | Homo sapiens beta-1,3-N-acetylgalactosaminyl transferase 1 (globoside blood group) (B3GALNT1), transcript variant 5, mRNA [NM_001038628] | 8706   |
| A_23_P41166  | 1.1  | 1.8  | -96.7 | -1.0 | B3GALNT1 | Homo sapiens beta-1,3-N-acetylgalactosaminyl transferase 1 (globoside blood group) (B3GALNT1), transcript variant 5, mRNA [NM_001038628] | 8706   |
| A_23_P334751 | -1.0 | -1.0 | -2.4  | -8.0 | B3GALNT2 | Homo sapiens beta-1,3-N-acetylgalactosaminyl transferase 2 (B3GALNT2), mRNA [NM_152490]                                                  | 148789 |

|              |      |      |     |      |         |                                                                                                                 |      |
|--------------|------|------|-----|------|---------|-----------------------------------------------------------------------------------------------------------------|------|
| A_23_P493    | 2.2  | -1.7 | 1.9 | 1.3  | B3GALT2 | Homo sapiens UDP-Gal:betaGl cNAc beta 1,3-galactosylt ransferase , polypeptid e 2 (B3GALT2) , mRNA [NM_0037 83] | 8707 |
| A_23_P499    | -3.5 | 1.0  | 1.5 | -1.1 | B3GALT2 | Homo sapiens UDP-Gal:betaGl cNAc beta 1,3-galactosylt ransferase , polypeptid e 2 (B3GALT2) , mRNA [NM_0037 83] | 8707 |
| A_23_P422071 | -1.4 | 2.4  | 1.3 | 1.2  | B3GALT4 | Homo sapiens UDP-Gal:betaGl cNAc beta 1,3-galactosylt ransferase , polypeptid e 4 (B3GALT4) , mRNA [NM_0037 82] | 8705 |

|              |      |      |      |      |         |                                                                                                       |        |
|--------------|------|------|------|------|---------|-------------------------------------------------------------------------------------------------------|--------|
| A_24_P832426 | -2.8 | -2.3 | 1.0  | 1.1  | B3GALT1 | Homo sapiens beta 1,3-galactosyltransferase-like (B3GALT1), mRNA [NM_194318]                          | 145173 |
| A_23_P36140  | 1.4  | 2.1  | 1.3  | 3.4  | B3GAT3  | Homo sapiens beta-1,3-glucuronyltransferase 3 (glucuronosyltransferase I) (B3GAT3), mRNA [NM_012200]  | 26229  |
| A_23_P18372  | -2.8 | 1.0  | -1.0 | -1.1 | B3GNT5  | Homo sapiens UDP-GlcNAc:betaGal beta-1,3-N-acetylglucosaminyltransferase 5 (B3GNT5), mRNA [NM_032047] | 84002  |

|              |      |      |      |      |        |                                                                                                                         |        |
|--------------|------|------|------|------|--------|-------------------------------------------------------------------------------------------------------------------------|--------|
| A_23_P366895 | -1.4 | -2.5 | -2.0 | -2.5 | B3GNT6 | Homo sapiens UDP-GlcNAc:betaGal beta-1,3-N-acetylglucosaminyltransferase 6 (core 3 synthase) (B3GNT6), mRNA [NM_138706] | 192134 |
| A_24_P20292  | 2.4  | 2.9  | 3.2  | -1.3 | B3GNT7 | Homo sapiens UDP-GlcNAc:betaGal beta-1,3-N-acetylglucosaminyltransferase 7 (B3GNT7), mRNA [NM_145236]                   | 93010  |
| A_23_P101380 | -1.3 | 1.0  | -1.4 | -2.1 | B3GNT8 | Homo sapiens UDP-GlcNAc:betaGal beta-1,3-N-acetylglucosaminyltransferase 8 (B3GNT8), mRNA [NM_198540]                   | 374907 |



|              |      |      |      |      |        |                                                                                                          |       |
|--------------|------|------|------|------|--------|----------------------------------------------------------------------------------------------------------|-------|
| A_24_P279172 | 1.3  | 6.5  | 5.4  | 2.6  | B3GNT9 | Homo sapiens<br>UDP-GlcNAc:betaGal beta-1,3-N-acetylglucosaminyltransferase 9 (B3GNT9), mRNA [NM_033309] | 84752 |
| A_23_P66050  | -2.0 | -1.9 | -1.2 | -2.0 | B3GNT9 | Homo sapiens<br>UDP-GlcNAc:betaGal beta-1,3-N-acetylglucosaminyltransferase 9 (B3GNT9), mRNA [NM_033309] | 84752 |
| A_23_P379736 | -1.3 | 1.5  | -2.2 | 1.1  | B3GNT9 | Homo sapiens<br>UDP-GlcNAc:betaGal beta-1,3-N-acetylglucosaminyltransferase 9 (B3GNT9), mRNA [NM_033309] | 84752 |

|              |     |      |      |     |          |                                                                                                                |        |
|--------------|-----|------|------|-----|----------|----------------------------------------------------------------------------------------------------------------|--------|
| A_24_P181672 | 2.2 | -1.1 | 1.4  | 1.2 | B3GNTL1  | Homo sapiens UDP-GlcNAc:betaGal beta-1,3-N-acetylglucosaminyltransferase-like 1 (B3GNTL1), mRNA [NM_001009905] | 146712 |
| A_23_P87461  | 1.7 | 3.1  | 1.4  | 2.6 | B4GALNT1 | Homo sapiens beta-1,4-N-acetyl-galactosaminyl transferase 1 (B4GALNT1), mRNA [NM_001478]                       | 2583   |
| A_24_P359291 | 3.1 | 5.4  | -1.2 | 2.7 | B4GALNT1 | Homo sapiens beta-1,4-N-acetyl-galactosaminyl transferase 1 (B4GALNT1), mRNA [NM_001478]                       | 2583   |

|              |     |      |      |     |          |                                                                                                                                 |        |
|--------------|-----|------|------|-----|----------|---------------------------------------------------------------------------------------------------------------------------------|--------|
| A_32_P49748  | 1.1 | -6.7 | 1.6  | 1.1 | B4GALNT3 | beta-1,4-N-acetyl-galactosaminyl transferase 3<br>[Source:HGNC Symbol;Acc:24137]<br>[ENST00000535402]                           | 283358 |
| A_23_P135271 | 1.5 | 2.5  | 7.1  | 1.3 | B4GALT1  | Homo sapiens UDP-Gal:betaGlcNAc beta 1,4-galactosyltransferase, polypeptide 1 (B4GALT1), mRNA [NM_001497]                       | 2683   |
| A_24_P242440 | 1.6 | 2.7  | -3.1 | 1.0 | B4GALT2  | Homo sapiens UDP-Gal:betaGlcNAc beta 1,4-galactosyltransferase, polypeptide 2 (B4GALT2), transcript variant 2, mRNA [NM_003780] | 8704   |

|              |      |     |     |      |         |                                                                                                                                                                              |      |
|--------------|------|-----|-----|------|---------|------------------------------------------------------------------------------------------------------------------------------------------------------------------------------|------|
| A_23_P103919 | 2.8  | 1.7 | 2.1 | 2.5  | B4GALT3 | Homo sapiens<br>UDP-Gal:betaGl<br>cNAc beta<br>1,4-<br>galactosylt<br>ransferase<br>,<br>polypeptid<br>e 3<br>(B4GALT3)<br>, transcript<br>variant 2,<br>mRNA<br>[NM_003779] | 8703 |
| A_32_P103945 | -3.8 | 4.0 | 2.6 | -1.6 | B4GALT4 | Homo sapiens<br>UDP-Gal:betaGl<br>cNAc beta<br>1,4-<br>galactosylt<br>ransferase<br>,<br>polypeptid<br>e 4<br>(B4GALT4)<br>, transcript<br>variant 1,<br>mRNA<br>[NM_212543] | 8702 |

|              |      |     |      |      |         |                                                                                                                                   |       |
|--------------|------|-----|------|------|---------|-----------------------------------------------------------------------------------------------------------------------------------|-------|
| A_23_P118946 | 1.6  | 1.6 | -2.1 | 1.3  | B4GALT6 | Homo sapiens UDP-Gal:betaGl cNAc beta 1,4-galactosyltransferase , polypeptide 6 (B4GALT6) , mRNA [NM_004775]                      | 9331  |
| A_23_P41872  | -5.0 | 2.0 | 1.9  | -1.0 | B4GALT7 | Homo sapiens xylosylprotein beta 1,4-galactosyltransferase , polypeptide 7 (galactosyltransferase I) (B4GALT7) , mRNA [NM_007255] | 11285 |
| A_24_P176714 | 2.1  | 2.1 | 3.0  | 1.5  | B9D1    | Homo sapiens B9 protein domain 1 (B9D1), transcript variant 2, mRNA [NM_015681]                                                   | 27077 |

|              |      |      |      |      |       |                                                                                                  |       |
|--------------|------|------|------|------|-------|--------------------------------------------------------------------------------------------------|-------|
| A_23_P154875 | -1.2 | -3.8 | 1.3  | -1.4 | BACE2 | Homo sapiens beta-site APP-cleaving enzyme 2 (BACE2), transcript variant a, mRNA [NM_012105]     | 25825 |
| A_24_P14584  | 1.5  | 1.0  | 2.2  | 1.0  | BACE2 | Homo sapiens beta-site APP-cleaving enzyme 2 (BACE2), transcript variant a, mRNA [NM_012105]     | 25825 |
| A_23_P150207 | -1.1 | 1.5  | 1.4  | -2.1 | BAD   | Homo sapiens BCL2-associated agonist of cell death (BAD), transcript variant 1, mRNA [NM_004322] | 572   |
| A_23_P356554 | 1.5  | 1.0  | -7.1 | 1.0  | BAG2  | Homo sapiens BCL2-associated athanogene 2 (BAG2), mRNA [NM_004282]                               | 9532  |

|              |      |      |      |      |      |                                                                                          |      |
|--------------|------|------|------|------|------|------------------------------------------------------------------------------------------|------|
| A_23_P52552  | -2.0 | -3.0 | -1.1 | -1.0 | BAG3 | Homo sapiens BCL2-associated athanogene 3 (BAG3), mRNA [NM_004281]                       | 9531 |
| A_23_P146217 | 2.3  | 2.3  | 2.3  | 2.3  | BAG4 | Homo sapiens BCL2-associated athanogene 4 (BAG4), transcript variant 1, mRNA [NM_004874] | 9530 |
| A_24_P608411 | 1.8  | -1.1 | -1.4 | 3.1  | BAG6 | BCL2-associated athanogene 6 [Source:HGNC Symbol;Acc:13919] [ENST00000383448]            | 7917 |

|              |     |     |      |      |       |                                                                                                         |       |
|--------------|-----|-----|------|------|-------|---------------------------------------------------------------------------------------------------------|-------|
| A_32_P103771 | 1.9 | 2.0 | -7.6 | 1.6  | BAGE  | Homo sapiens B melanoma antigen variant d (BAGE1) mRNA, complete cds, alternatively spliced. [AF527552] | 574   |
| A_24_P126262 | 1.1 | 1.0 | -2.2 | -1.0 | BAGE4 | Homo sapiens B melanoma antigen family, member 4 (BAGE4), mRNA [NM_181704]                              | 85317 |
| A_23_P125056 | 1.6 | 6.7 | -1.3 | 1.7  | BAI1  | Homo sapiens brain-specific angiogenesis inhibitor 1 (BAI1), mRNA [NM_001702]                           | 575   |
| A_23_P149019 | 2.3 | 2.7 | 2.1  | 1.2  | BAI2  | Homo sapiens brain-specific angiogenesis inhibitor 2 (BAI2), mRNA [NM_001703]                           | 576   |



|              |      |      |      |      |          |                                                                                                  |       |
|--------------|------|------|------|------|----------|--------------------------------------------------------------------------------------------------|-------|
| A_23_P61810  | -1.0 | -9.5 | -1.0 | -1.0 | BAIAP2   | Homo sapiens BAI1-associated protein 2 (BAIAP2), transcript variant 1, mRNA [NM_017450]          | 10458 |
| A_24_P159648 | 2.7  | 2.6  | -1.4 | 1.9  | BAIAP2   | Homo sapiens BAI1-associated protein 2 (BAIAP2), transcript variant 3, mRNA [NM_006340]          | 10458 |
| A_23_P168470 | -1.0 | -1.0 | -1.0 | -3.2 | BAIAP2L1 | Homo sapiens BAI1-associated protein 2-like 1 (BAIAP2L1), mRNA [NM_018842]                       | 55971 |
| A_23_P47208  | -1.1 | -2.2 | 2.1  | -2.7 | BANF1    | Homo sapiens barrier to autointegration factor 1 (BANF1), transcript variant 1, mRNA [NM_003860] | 8815  |

|              |      |      |      |      |      |                                                                                                         |       |
|--------------|------|------|------|------|------|---------------------------------------------------------------------------------------------------------|-------|
| A_23_P251767 | 3.1  | 1.9  | 2.2  | -5.5 | BANP | Homo sapiens BTG3 associated nuclear protein (BANP), transcript variant 1, mRNA [NM_017869]             | 54971 |
| A_23_P251765 | 6.5  | 2.0  | 4.8  | 2.7  | BANP | Homo sapiens BTG3 associated nuclear protein (BANP), transcript variant 2, mRNA [NM_079837]             | 54971 |
| A_23_P259012 | -1.0 | -1.3 | -1.1 | -2.4 | BAP1 | Homo sapiens BRCA1 associated protein-1 (ubiquitin carboxy-terminal hydrolase) (BAP1), mRNA [NM_004656] | 8314  |

|              |      |      |      |      |        |                                                                                                         |        |
|--------------|------|------|------|------|--------|---------------------------------------------------------------------------------------------------------|--------|
| A_24_P302898 | -8.7 | 1.0  | 2.2  | -2.1 | BAP1   | Homo sapiens BRCA1 associated protein-1 (ubiquitin carboxy-terminal hydrolase) (BAP1), mRNA [NM_004656] | 8314   |
| A_23_P67771  | 1.6  | 2.5  | 1.6  | -1.2 | BARD1  | Homo sapiens BRCA1 associated RING domain 1 (BARD1), mRNA [NM_000465]                                   | 580    |
| A_23_P126349 | 1.5  | -5.0 | -1.2 | -1.6 | BARHL2 | Homo sapiens BarH-like homeobox 2 (BARHL2), mRNA [NM_020063]                                            | 343472 |
| A_23_P90189  | -1.6 | -1.5 | -2.8 | -1.6 | BBC3   | Homo sapiens BCL2 binding component 3 (BBC3), transcript variant 4, mRNA [NM_014417]                    | 27113  |

|              |     |      |      |     |       |                                                                                              |       |
|--------------|-----|------|------|-----|-------|----------------------------------------------------------------------------------------------|-------|
| A_24_P305312 | 4.6 | 1.5  | 1.9  | 1.9 | BBC3  | Homo sapiens BCL2 binding component 3 (BBC3), transcript variant 4, mRNA [NM_014417]         | 27113 |
| A_24_P852082 | 1.1 | -1.7 | -2.2 | 1.1 | BBIP1 | Homo sapiens BBSome interacting protein 1 (BBIP1), transcript variant 1, mRNA [NM_001195304] | 92482 |
| A_23_P150267 | 2.0 | 2.3  | 1.8  | 2.4 | BBS1  | Homo sapiens Bardet-Biedl syndrome 1 (BBS1), mRNA [NM_024649]                                | 582   |
| A_24_P184305 | 1.2 | 2.4  | 2.3  | 2.5 | BBS1  | Homo sapiens Bardet-Biedl syndrome 1 (BBS1), mRNA [NM_024649]                                | 582   |

|              |      |      |      |      |        |                                                                                           |        |
|--------------|------|------|------|------|--------|-------------------------------------------------------------------------------------------|--------|
| A_23_P5785   | 1.3  | -1.0 | 2.0  | -1.0 | BBS5   | Homo sapiens Bardet-Biedl syndrome 5 (BBS5), mRNA [NM_152384]                             | 129880 |
| A_32_P22191  | 1.4  | -1.1 | -8.8 | 1.8  | BBX    | Homo sapiens bobby sox homolog (Drosophila) (BBX), transcript variant 2, mRNA [NM_020235] | 56987  |
| A_23_P160607 | 6.1  | 2.3  | 1.3  | 1.8  | BCAN   | Homo sapiens brevican (BCAN), transcript variant 1, mRNA [NM_021948]                      | 63827  |
| A_23_P412526 | -1.9 | -3.1 | -1.8 | -1.3 | BCAP29 | Homo sapiens B-cell receptor-associated protein BAP29 mRNA, complete cds. [AF126020]      | 55973  |

|              |      |     |     |      |        |                                                                                                       |       |
|--------------|------|-----|-----|------|--------|-------------------------------------------------------------------------------------------------------|-------|
| A_24_P134683 | 1.2  | 1.3 | 2.6 | 1.1  | BCAP31 | Homo sapiens B-cell receptor-associated protein 31 (BCAP31), transcript variant 2, mRNA [NM_005745]   | 10134 |
| A_32_P4364   | 1.2  | 1.8 | 2.5 | 1.0  | BCAP31 | Homo sapiens B-cell receptor-associated protein 31 (BCAP31), transcript variant 2, mRNA [NM_005745]   | 10134 |
| A_23_P66319  | -1.4 | 1.1 | 1.1 | -2.4 | BCAR1  | Homo sapiens breast cancer anti-estrogen resistance 1 (BCAR1), transcript variant 6, mRNA [NM_014567] | 9564  |

|              |      |      |      |      |       |                                                                                                                |        |
|--------------|------|------|------|------|-------|----------------------------------------------------------------------------------------------------------------|--------|
| A_32_P106933 | -1.3 | -1.3 | -1.3 | -2.4 | BCAR4 | Homo sapiens breast cancer anti-estrogen resistance 4 (non-protein coding) (BCAR4), non-coding RNA [NR_024049] | 400500 |
| A_23_P153070 | -1.9 | -1.9 | 1.2  | -2.1 | BCAS3 | Homo sapiens breast carcinoma amplified sequence 3 (BCAS3), transcript variant 2, mRNA [NM_017679]             | 54828  |
| A_24_P100761 | 1.3  | -1.0 | 1.0  | 3.1  | BCAS3 | Homo sapiens breast carcinoma amplified sequence 3 (BCAS3), transcript variant 2, mRNA [NM_017679]             | 54828  |

|             |      |      |      |      |       |                                                                                                                     |       |
|-------------|------|------|------|------|-------|---------------------------------------------------------------------------------------------------------------------|-------|
| A_32_P23659 | 1.5  | -6.6 | -1.4 | -1.5 | BCAS4 | breast carcinoma amplified sequence 4<br>[Source:HGNC Symbol;Acc:14367]<br>[ENST00000463943]                        | 55653 |
| A_24_P52921 | -1.9 | 1.1  | -6.3 | -1.5 | BCAT1 | Homo sapiens branched chain amino-acid transaminase 1, cytosolic (BCAT1), transcript variant 1, mRNA<br>[NM_005504] | 586   |
| A_24_P30206 | 1.1  | 1.1  | -3.0 | 1.1  | BCCIP | Homo sapiens BRCA2 and CDKN1A interacting protein (BCCIP), transcript variant B, mRNA<br>[NM_078468]                | 56647 |



|             |      |      |      |      |        |                                                                                                                                                                         |       |
|-------------|------|------|------|------|--------|-------------------------------------------------------------------------------------------------------------------------------------------------------------------------|-------|
| A_23_P67188 | 1.4  | -4.6 | 1.0  | 1.7  | BCKDHA | Homo sapiens branched chain keto acid dehydrogenase E1, alpha polypeptide (BCKDHA), nuclear gene encoding mitochondrial protein, transcript variant 1, mRNA [NM_000709] | 593   |
| A_23_P3823  | -1.1 | -7.1 | -1.2 | -1.1 | BCKDK  | Homo sapiens branched chain ketoacid dehydrogenase kinase (BCKDK), nuclear gene encoding mitochondrial protein, transcript variant 2, mRNA [NM_001122957]               | 10295 |

|              |      |      |      |      |         |                                                                                                             |       |
|--------------|------|------|------|------|---------|-------------------------------------------------------------------------------------------------------------|-------|
| A_23_P218584 | -1.1 | -1.1 | -1.2 | 2.3  | BCL11A  | Homo sapiens B-cell CLL/lymphoma 11A (zinc finger protein) (BCL11A), transcript variant 1, mRNA [NM_022893] | 53335 |
| A_23_P205738 | 1.0  | -1.2 | 1.0  | -2.4 | BCL11B  | Homo sapiens B-cell CLL/lymphoma 11B (zinc finger protein) (BCL11B), transcript variant 1, mRNA [NM_138576] | 64919 |
| A_23_P425954 | 1.1  | -2.7 | -1.1 | 1.0  | BCL2L11 | Homo sapiens BCL2-like 11 (apoptosis facilitator) (BCL2L11), transcript variant 1, mRNA [NM_138621]         | 10018 |

|              |     |     |     |     |         |                                                                                            |       |
|--------------|-----|-----|-----|-----|---------|--------------------------------------------------------------------------------------------|-------|
| A_23_P50477  | 1.9 | 1.6 | 2.0 | 1.3 | BCL2L12 | Homo sapiens BCL2-like 12 (proline rich) (BCL2L12), transcript variant 1, mRNA [NM_138639] | 83596 |
| A_23_P418373 | 1.4 | 2.7 | 2.5 | 1.1 | BCL2L2  | Homo sapiens BCL2-like 2 (BCL2L2), transcript variant 1, mRNA [NM_004050]                  | 599   |
| A_23_P61826  | 2.5 | 2.2 | 2.0 | 1.8 | BCL7A   | Homo sapiens B-cell CLL/lymphoma 7A (BCL7A), transcript variant 1, mRNA [NM_020993]        | 605   |
| A_24_P203056 | 2.5 | 1.3 | 1.4 | 2.0 | BCL7A   | Homo sapiens B-cell CLL/lymphoma 7A (BCL7A), transcript variant 1, mRNA [NM_020993]        | 605   |

|              |      |      |      |      |       |                                                                                     |        |
|--------------|------|------|------|------|-------|-------------------------------------------------------------------------------------|--------|
| A_23_P123010 | -1.2 | -1.7 | -2.1 | -1.2 | BCL7B | Homo sapiens B-cell CLL/lymphoma 7B (BCL7B), transcript variant 1, mRNA [NM_001707] | 9275   |
| A_23_P118289 | 1.7  | 2.1  | 1.4  | -2.4 | BCL7C | Homo sapiens B-cell CLL/lymphoma 7C (BCL7C), mRNA [NM_004765]                       | 9274   |
| A_23_P382602 | 1.1  | -2.1 | 1.8  | 2.0  | BCL9  | Homo sapiens B-cell CLL/lymphoma 9 (BCL9), mRNA [NM_004326]                         | 607    |
| A_24_P134816 | 1.0  | -1.0 | -2.2 | 1.6  | BCL9L | Homo sapiens B-cell CLL/lymphoma 9-like (BCL9L), mRNA [NM_182557]                   | 283149 |

|              |      |      |      |      |      |                                                                                       |       |
|--------------|------|------|------|------|------|---------------------------------------------------------------------------------------|-------|
| A_23_P116187 | -1.2 | -1.2 | -2.4 | 1.2  | BCO2 | Homo sapiens beta-carotene oxygenase 2 (BCO2), transcript variant 1, mRNA [NM_031938] | 83875 |
| A_23_P159741 | 2.2  | 1.6  | 1.4  | 1.1  | BCOR | Homo sapiens BCL6 corepressor (BCOR), transcript variant 1, mRNA [NM_017745]          | 54880 |
| A_24_P15270  | 1.7  | 1.5  | 2.2  | -1.5 | BCR  | Homo sapiens breakpoint cluster region (BCR), transcript variant 1, mRNA [NM_004327]  | 613   |
| A_23_P503115 | -3.7 | -1.1 | 1.4  | 1.4  | BCR  | Homo sapiens breakpoint cluster region (BCR), transcript variant 1, mRNA [NM_004327]  | 613   |

|              |      |       |       |      |       |                                                                                         |        |
|--------------|------|-------|-------|------|-------|-----------------------------------------------------------------------------------------|--------|
| A_32_P232865 | 1.2  | -1.1  | -11.4 | 1.3  | BCR   | Homo sapiens breakpoint cluster region (BCR), transcript variant 1, mRNA [NM_004327]    | 613    |
| A_24_P23951  | -1.5 | -19.5 | -2.4  | -1.2 | BCRP2 | Homo sapiens breakpoint cluster region pseudogene 2 (BCRP2), non-coding RNA [NR_037566] | 400892 |
| A_23_P154086 | 1.0  | 1.0   | -2.0  | 1.0  | BCS1L | Homo sapiens BCS1-like (S. cerevisiae) (BCS1L), transcript variant 1, mRNA [NM_004328]  | 617    |
| A_24_P80500  | 17.3 | 10.3  | 7.6   | 1.9  | BDH2  | Homo sapiens 3-hydroxybutyrate dehydrogenase, type 2 (BDH2), mRNA [NM_020139]           | 56898  |

|              |      |      |      |      |        |                                                                                                                            |       |
|--------------|------|------|------|------|--------|----------------------------------------------------------------------------------------------------------------------------|-------|
| A_24_P919850 | 2.3  | 1.0  | -2.0 | -1.0 | BDKRB1 | Homo sapiens bradykinin receptor B1 (BDKRB1), mRNA [NM_000710]                                                             | 623   |
| A_32_P7316   | -1.0 | -1.1 | -3.5 | -1.1 | BDNF   | Homo sapiens brain-derived neurotrophic factor (BDNF), transcript variant 1, mRNA [NM_170735]                              | 627   |
| A_24_P247910 | -1.2 | 3.9  | 3.5  | 2.7  | BDP1   | Homo sapiens mRNA for KIAA1241 protein, partial cds. [AB033067]                                                            | 55814 |
| A_24_P42316  | 1.5  | 1.0  | -3.5 | -1.0 | BDP1   | Homo sapiens B double prime 1, subunit of RNA polymerase III transcription initiation factor IIIB (BDP1), mRNA [NM_018429] | 55814 |

|              |      |      |      |      |       |                                                                                      |        |
|--------------|------|------|------|------|-------|--------------------------------------------------------------------------------------|--------|
| A_24_P313597 | -2.6 | 1.1  | 1.1  | 1.5  | BECN1 | Homo sapiens beclin 1, autophagy related (BECN1), mRNA [NM_003766]                   | 8678   |
| A_23_P433071 | -5.5 | -1.0 | -1.0 | 1.0  | BECN1 | Homo sapiens beclin 1, autophagy related (BECN1), mRNA [NM_003766]                   | 8678   |
| A_23_P904    | -1.0 | -1.0 | -1.1 | -8.4 | BEND5 | Homo sapiens BEN domain containing 5 (BEND5), mRNA [NM_024603]                       | 79656  |
| A_23_P312358 | 1.0  | -2.6 | 1.0  | 1.1  | BEND7 | Homo sapiens BEN domain containing 7 (BEND7), transcript variant 1, mRNA [NM_152751] | 222389 |



|              |     |      |      |      |       |                                                                           |        |
|--------------|-----|------|------|------|-------|---------------------------------------------------------------------------|--------|
| A_23_P104996 | 1.5 | -1.2 | -1.1 | 11.2 | BEST1 | Homo sapiens bestrophin 1 (BEST1), transcript variant 1, mRNA [NM_004183] | 7439   |
| A_32_P98966  | 2.6 | 1.3  | -1.2 | 1.1  | BEST1 | bestrophin 1 [Source:HGNC Symbol;Acc:12703] [ENST00000449131]             | 7439   |
| A_23_P323801 | 1.0 | 1.0  | -2.9 | 1.1  | BEST3 | Homo sapiens bestrophin 3 (BEST3), transcript variant 1, mRNA [NM_032735] | 144453 |
| A_23_P97242  | 1.7 | 4.6  | -1.3 | -1.2 | BEST4 | Homo sapiens bestrophin 4 (BEST4), mRNA [NM_153274]                       | 266675 |

|              |      |      |      |      |       |                                                                                                                        |       |
|--------------|------|------|------|------|-------|------------------------------------------------------------------------------------------------------------------------|-------|
| A_23_P59700  | -2.1 | -1.3 | -1.4 | -1.5 | BET1  | Homo sapiens blocked early in transport 1 homolog (S. cerevisiae) (BET1), mRNA [NM_005868]                             | 10282 |
| A_24_P269432 | -1.6 | -3.3 | -3.6 | -3.5 | BET1  | Homo sapiens blocked early in transport 1 homolog (S. cerevisiae) (BET1), mRNA [NM_005868]                             | 10282 |
| A_23_P127879 | 1.5  | 2.8  | 1.4  | -1.9 | BET1L | Homo sapiens blocked early in transport 1 homolog (S. cerevisiae)-like (BET1L), transcript variant 2, mRNA [NM_016526] | 51272 |

|              |      |      |      |      |         |                                                                                            |        |
|--------------|------|------|------|------|---------|--------------------------------------------------------------------------------------------|--------|
| A_24_P40551  | 2.4  | 1.0  | 1.1  | 1.0  | BEX4    | Homo sapiens brain expressed, X-linked 4 (BEX4), transcript variant 2, mRNA [NM_001080425] | 56271  |
| A_24_P184931 | -3.4 | -1.4 | -1.5 | -1.5 | BFAR    | Homo sapiens bifunctional apoptosis regulator (BFAR), mRNA [NM_016561]                     | 51283  |
| A_24_P336551 | 3.2  | 1.3  | 1.9  | 1.4  | BGLAP   | Homo sapiens bone gamma-carboxyglutamate (gla) protein (BGLAP), mRNA [NM_199173]           | 632    |
| A_24_P57898  | -1.0 | 1.4  | -2.6 | 1.2  | BHLHE23 | Homo sapiens basic helix-loop-helix family, member e23 (BHLHE23), mRNA [NM_080606]         | 128408 |

|              |      |      |      |      |         |                                                                                                          |       |
|--------------|------|------|------|------|---------|----------------------------------------------------------------------------------------------------------|-------|
| A_24_P268676 | -2.5 | -1.0 | 1.1  | -1.0 | BHLHE40 | Homo sapiens basic helix-loop-helix family, member e40 (BHLHE40), mRNA [NM_003670]                       | 8553  |
| A_24_P257511 | 1.7  | -2.4 | -2.2 | 1.6  | BHMT    | Homo sapiens betaine--homocysteine S-methyltransferase (BHMT), mRNA [NM_001713]                          | 635   |
| A_24_P231829 | 1.0  | -9.8 | -1.0 | -2.8 | BHMT2   | Homo sapiens betaine--homocysteine S-methyltransferase 2 (BHMT2), transcript variant 1, mRNA [NM_017614] | 23743 |
| A_23_P154929 | 1.1  | 1.2  | 3.1  | 1.6  | BID     | Homo sapiens BH3 interacting domain death agonist (BID), transcript variant 1, mRNA [NM_197966]          | 637   |

|              |      |       |      |      |      |                                                                                                 |       |
|--------------|------|-------|------|------|------|-------------------------------------------------------------------------------------------------|-------|
| A_24_P187948 | 2.2  | 2.2   | 1.0  | 1.0  | BID  | Homo sapiens BH3 interacting domain death agonist (BID), transcript variant 1, mRNA [NM_197966] | 637   |
| A_24_P156993 | 3.4  | -21.4 | 3.1  | 2.7  | BIN1 | Homo sapiens bridging integrator 1 (BIN1), transcript variant 4, mRNA [NM_139346]               | 274   |
| A_24_P115443 | -2.2 | -1.0  | -1.3 | 1.2  | BIN3 | Homo sapiens bridging integrator 3 (BIN3), mRNA [NM_018688]                                     | 55909 |
| A_23_P43086  | 1.3  | 1.3   | 1.3  | -7.9 | BIN3 | Homo sapiens bridging integrator 3 (BIN3), mRNA [NM_018688]                                     | 55909 |

|              |      |      |      |      |       |                                                                                                  |       |
|--------------|------|------|------|------|-------|--------------------------------------------------------------------------------------------------|-------|
| A_24_P115774 | 1.1  | -7.2 | 1.1  | 1.0  | BIRC2 | Homo sapiens baculoviral IAP repeat containing 2 (BIRC2), mRNA [NM_001166]                       | 329   |
| A_23_P98350  | 1.0  | -1.0 | 2.6  | 1.0  | BIRC3 | Homo sapiens baculoviral IAP repeat containing 3 (BIRC3), transcript variant 1, mRNA [NM_001165] | 330   |
| A_23_P142616 | 1.0  | -1.6 | -2.1 | -3.9 | BIRC6 | Homo sapiens baculoviral IAP repeat containing 6 (BIRC6), mRNA [NM_016252]                       | 57448 |
| A_23_P79769  | -1.1 | 2.2  | 1.2  | -2.0 | BIRC7 | Homo sapiens baculoviral IAP repeat containing 7 (BIRC7), transcript variant 2, mRNA [NM_022161] | 79444 |

|              |      |      |      |      |      |                                                                                                                                     |        |
|--------------|------|------|------|------|------|-------------------------------------------------------------------------------------------------------------------------------------|--------|
| A_23_P105833 | 6.9  | 6.4  | 6.2  | 6.5  | BIVM | Homo sapiens basic, immunoglobulin-like variable motif containing (BIVM), transcript variant 1, mRNA [NM_017693]                    | 54841  |
| A_24_P50368  | -1.0 | -1.1 | -3.0 | -1.1 | BLID | Homo sapiens BH3-like motif containing, cell death inducer (BLID), nuclear gene encoding mitochondrial protein, mRNA [NM_001001786] | 414899 |
| A_23_P88630  | 1.3  | 1.3  | 2.4  | 1.3  | BLM  | Homo sapiens Bloom syndrome, RecQ helicase-like (BLM), mRNA [NM_000057]                                                             | 641    |

|             |      |      |     |      |      |                                                                                          |     |
|-------------|------|------|-----|------|------|------------------------------------------------------------------------------------------|-----|
| A_24_P60930 | 1.2  | -1.0 | 2.7 | -1.3 | BMP1 | Homo sapiens bone morphogenetic protein 1 (BMP1), transcript variant 3, mRNA [NM_006129] | 649 |
| A_23_P33277 | 1.5  | 3.1  | 1.5 | 1.1  | BMP1 | bone morphogenetic protein 1 [Source:HGNC Symbol;Acc:1067] [ENST00000397816]             | 649 |
| A_23_P81058 | -5.7 | 1.1  | 1.0 | 1.6  | BMP3 | Homo sapiens bone morphogenetic protein 3 (BMP3), mRNA [NM_001201]                       | 651 |
| A_23_P54144 | 2.9  | 2.2  | 2.9 | 2.8  | BMP4 | Homo sapiens bone morphogenetic protein 4 (BMP4), transcript variant 1, mRNA [NM_001202] | 652 |



|              |       |       |      |      |        |                                                                                      |     |
|--------------|-------|-------|------|------|--------|--------------------------------------------------------------------------------------|-----|
| A_23_P68487  | 1.1   | -15.3 | 1.0  | 1.0  | BMP7   | Homo sapiens bone morphogenetic protein 7 (BMP7), mRNA [NM_001719]                   | 655 |
| A_23_P380939 | -1.0  | -4.8  | -1.1 | -1.0 | BMP8B  | Homo sapiens bone morphogenetic protein 8b (BMP8B), mRNA [NM_001720]                 | 656 |
| A_24_P527404 | -12.2 | -1.0  | -1.1 | 1.0  | BMPR1A | Homo sapiens bone morphogenetic protein receptor, type IA (BMPR1A), mRNA [NM_004329] | 657 |
| A_24_P418717 | 2.3   | -1.1  | 2.1  | -1.0 | BMPR1A | Homo sapiens bone morphogenetic protein receptor, type IA (BMPR1A), mRNA [NM_004329] | 657 |

|              |      |      |      |      |       |                                                                                                               |      |
|--------------|------|------|------|------|-------|---------------------------------------------------------------------------------------------------------------|------|
| A_24_P753161 | 7.7  | 12.8 | 12.5 | 13.7 | BMPR2 | Homo sapiens bone morphogenetic protein receptor, type II (serine/threonine kinase) (BMPR2), mRNA [NM_001204] | 659  |
| A_24_P649747 | -2.5 | 2.5  | -1.5 | -1.3 | BMS1  | Homo sapiens BMS1 homolog, ribosome assembly protein (yeast) (BMS1), mRNA [NM_014753]                         | 9790 |
| A_23_P24068  | 2.0  | 2.0  | 1.4  | 1.8  | BMS1  | Homo sapiens BMS1 homolog, ribosome assembly protein (yeast) (BMS1), mRNA [NM_014753]                         | 9790 |

|              |      |      |      |      |      |                                                                                             |       |
|--------------|------|------|------|------|------|---------------------------------------------------------------------------------------------|-------|
| A_24_P263672 | 1.4  | 2.1  | 2.1  | 1.0  | BMS1 | Homo sapiens BMS1 homolog, ribosome assembly protein (yeast) (BMS1), mRNA [NM_014753]       | 9790  |
| A_24_P615822 | 1.1  | -1.6 | -3.7 | -2.4 | BMS1 | Homo sapiens BMS1 homolog, ribosome assembly protein (yeast) (BMS1), mRNA [NM_014753]       | 9790  |
| A_24_P263144 | 20.4 | 19.6 | 18.1 | 18.7 | BMX  | Homo sapiens BMX non-receptor tyrosine kinase (BMX), transcript variant 2, mRNA [NM_001721] | 660   |
| A_23_P43690  | 1.1  | 1.0  | -2.9 | 1.6  | BNC2 | Homo sapiens basanuclin 2 (BNC2), mRNA [NM_017637]                                          | 54796 |

|              |      |      |      |      |       |                                                                                                                                     |        |
|--------------|------|------|------|------|-------|-------------------------------------------------------------------------------------------------------------------------------------|--------|
| A_23_P138635 | -1.1 | -1.1 | -1.1 | -4.9 | BNIP3 | Homo sapiens BCL2/adenovirus E1B 19kDa interacting protein 3 (BNIP3), nuclear gene encoding mitochondrial protein, mRNA [NM_004052] | 664    |
| A_23_P257763 | -1.8 | -1.1 | -2.8 | -1.5 | BOC   | Homo sapiens Boc homolog (mouse) (BOC), mRNA [NM_033254]                                                                            | 91653  |
| A_23_P345212 | 1.4  | -3.1 | 1.0  | -1.0 | BOD1P | Homo sapiens biorientation of chromosomes in cell division 1 pseudogene (BOD1P), non-coding RNA [NR_033372]                         | 284257 |

|              |      |      |      |      |       |                                                                                       |        |
|--------------|------|------|------|------|-------|---------------------------------------------------------------------------------------|--------|
| A_23_P253029 | -2.1 | -1.3 | -6.6 | -2.0 | BOK   | Homo sapiens BCL2-related ovarian killer (BOK), mRNA [NM_032515]                      | 666    |
| A_23_P46507  | 3.4  | 1.6  | -1.6 | -1.1 | BOLA1 | Homo sapiens bolA homolog 1 (E. coli) (BOLA1), mRNA [NM_016074]                       | 51027  |
| A_24_P77364  | 1.1  | -2.1 | -2.9 | -3.3 | BOLA3 | Homo sapiens bolA homolog 3 (E. coli) (BOLA3), transcript variant 1, mRNA [NM_212552] | 388962 |
| A_23_P131706 | 1.8  | 1.8  | 1.8  | 2.2  | BOLA3 | Homo sapiens bolA homolog 3 (E. coli) (BOLA3), transcript variant 1, mRNA [NM_212552] | 388962 |

|              |      |      |      |      |        |                                                                                |        |
|--------------|------|------|------|------|--------|--------------------------------------------------------------------------------|--------|
| A_23_P43800  | 5.5  | 10.4 | 3.6  | 18.6 | BOP1   | Homo sapiens block of proliferation 1 (BOP1), mRNA [NM_015201]                 | 23246  |
| A_23_P25626  | -5.9 | -1.1 | 1.3  | -1.0 | BORA   | Homo sapiens bora, aurora kinase A activator (BORA), mRNA [NM_024808]          | 79866  |
| A_23_P154784 | -6.1 | -2.4 | -1.9 | -1.1 | BPIFB1 | Homo sapiens BPI fold containing family B, member 1 (BPIFB1), mRNA [NM_033197] | 92747  |
| A_32_P419502 | 3.2  | 1.3  | 3.1  | 3.7  | BPIFC  | Homo sapiens BPI fold containing family C (BPIFC), mRNA [NM_174932]            | 254240 |

|              |      |      |      |      |       |                                                                                                         |        |
|--------------|------|------|------|------|-------|---------------------------------------------------------------------------------------------------------|--------|
| A_24_P104538 | 1.3  | -2.9 | 1.5  | 1.4  | BPTF  | bromodomain PHD finger transcription factor [Source:HGNC Symbol;Acc:3581] [ENST00000342579]             | 2186   |
| A_23_P428548 | 4.9  | 3.0  | 3.8  | 1.6  | BPTF  | Homo sapiens bromodomain PHD finger transcription factor (BPTF), transcript variant 1, mRNA [NM_182641] | 2186   |
| A_23_P45598  | -1.0 | -5.8 | -1.1 | -1.0 | BPY2B | Homo sapiens basic charge, Y-linked, 2B (BPY2B), mRNA [NM_001002760]                                    | 442867 |
| A_23_P251898 | -2.7 | -3.8 | -3.3 | -1.4 | BRAT1 | Homo sapiens BRCA1-associated ATM activator 1 (BRAT1), mRNA [NM_152743]                                 | 221927 |

|              |      |      |      |       |      |                                                                                      |       |
|--------------|------|------|------|-------|------|--------------------------------------------------------------------------------------|-------|
| A_23_P166536 | 1.9  | 3.7  | 1.5  | 1.9   | BRD1 | Homo sapiens bromodomain containing 1 (BRD1), mRNA [NM_014577]                       | 23774 |
| A_24_P307014 | 3.0  | 1.6  | -1.1 | -1.0  | BRD2 | Homo sapiens bromodomain containing 2 (BRD2), transcript variant 1, mRNA [NM_005104] | 6046  |
| A_23_P256898 | 1.0  | -1.0 | 1.1  | -11.0 | BRD2 | Homo sapiens bromodomain containing 2 (BRD2), transcript variant 1, mRNA [NM_005104] | 6046  |
| A_24_P32887  | -3.4 | 1.0  | -2.6 | -1.1  | BRD3 | Homo sapiens bromodomain containing 3 (BRD3), mRNA [NM_007371]                       | 8019  |



|              |       |      |      |     |        |                                                                                                                        |       |
|--------------|-------|------|------|-----|--------|------------------------------------------------------------------------------------------------------------------------|-------|
| A_23_P42020  | -16.3 | 1.0  | -1.0 | 1.0 | BRD7P3 | Homo sapiens bromodomain containing 7 pseudogene 3 (BRD7P3), non-coding RNA [NR_002730]                                | 23629 |
| A_23_P145016 | -2.7  | -3.5 | -1.0 | 1.4 | BRD8   | Homo sapiens bromodomain containing 8 (BRD8), transcript variant 1, mRNA [NM_006696]                                   | 10902 |
| A_32_P132796 | -3.7  | 2.7  | -1.4 | 1.2 | BRE    | Homo sapiens brain and reproductive organ-expressed (TNFRSF1A modulator) (BRE), transcript variant 1, mRNA [NM_004899] | 9577  |

|              |     |     |     |     |      |                                                                                                                                                                 |      |
|--------------|-----|-----|-----|-----|------|-----------------------------------------------------------------------------------------------------------------------------------------------------------------|------|
| A_24_P102411 | 3.3 | 1.0 | 1.0 | 1.0 | BRF1 | Homo sapiens BRF1 homolog, subunit of RNA polymerase III transcription initiation factor IIIB (S. cerevisiae) (BRF1), transcript variant 8, mRNA [NM_001242790] | 2972 |
| A_23_P117416 | 1.9 | 1.8 | 2.4 | 1.2 | BRF1 | Homo sapiens BRF1 homolog, subunit of RNA polymerase III transcription initiation factor IIIB (S. cerevisiae) (BRF1), transcript variant 3, mRNA [NM_145685]    | 2972 |

|              |      |      |      |      |       |                                                                                               |       |
|--------------|------|------|------|------|-------|-----------------------------------------------------------------------------------------------|-------|
| A_23_P15844  | -1.5 | -1.5 | -9.1 | -2.9 | BRIP1 | Homo sapiens BRCA1 interacting protein C-terminal helicase 1 (BRIP1), mRNA [NM_032043]        | 83990 |
| A_23_P252857 | 4.0  | 3.4  | 3.5  | 3.3  | BRIX1 | Homo sapiens BRX1, biogenesis of ribosomes, homolog (S. cerevisiae) (BRIX1), mRNA [NM_018321] | 55299 |
| A_23_P420361 | 1.0  | 1.2  | -1.5 | 2.2  | BRK1  | Homo sapiens BRICK1, SCAR/WAVE actin-nucleating complex subunit (BRK1), mRNA [NM_018462]      | 55845 |

|              |      |       |      |      |        |                                                                                                       |        |
|--------------|------|-------|------|------|--------|-------------------------------------------------------------------------------------------------------|--------|
| A_23_P75500  | -1.0 | -20.7 | -1.1 | -1.1 | BRMS1  | Homo sapiens breast cancer metastasis suppressor 1 (BRMS1), transcript variant 2, mRNA [NM_001024957] | 25855  |
| A_23_P205419 | -1.7 | -2.0  | -1.5 | -1.2 | BRMS1L | Homo sapiens breast cancer metastasis-suppressor 1-like (BRMS1L), mRNA [NM_032352]                    | 84312  |
| A_23_P359636 | -3.7 | 1.2   | 1.1  | -1.0 | BROX   | Homo sapiens BRO1 domain and CAAX motif containing (BROX), mRNA [NM_144695]                           | 148362 |
| A_32_P179854 | 3.2  | 3.2   | -8.2 | 2.1  | BRP44  | Homo sapiens brain protein 44 (BRP44), transcript variant 1, mRNA [NM_001143674]                      | 25874  |

|              |      |     |      |      |        |                                                                                                               |       |
|--------------|------|-----|------|------|--------|---------------------------------------------------------------------------------------------------------------|-------|
| A_23_P110961 | 2.7  | 1.0 | 1.0  | 1.0  | BRP44L | Homo sapiens brain protein 44-like (BRP44L), mRNA [NM_016098]                                                 | 51660 |
| A_23_P250948 | 2.6  | 3.4 | 3.2  | 2.4  | BRPF1  | Homo sapiens bromodomain and PHD finger containing 1 (BRPF1), transcript variant 1, mRNA [NM_001003694]       | 7862  |
| A_24_P326708 | 1.4  | 1.5 | 2.0  | 1.2  | BRSK2  | Homo sapiens BR serine/threonine kinase 2 (BRSK2), mRNA [NM_003957]                                           | 9024  |
| A_24_P861009 | -2.1 | 1.0 | -1.0 | -1.0 | BRWD1  | Homo sapiens bromodomain and WD repeat domain containing 1 (BRWD1), transcript variant 3, mRNA [NM_001007246] | 54014 |

|              |      |      |      |      |       |                                                                                      |        |
|--------------|------|------|------|------|-------|--------------------------------------------------------------------------------------|--------|
| A_23_P379159 | -1.1 | 1.9  | -2.7 | -2.3 | BRWD3 | Homo sapiens bromodomain and WD repeat domain containing 3 (BRWD3), mRNA [NM_153252] | 254065 |
| A_32_P148380 | 1.1  | -1.1 | -2.1 | -1.1 | BRWD3 | Homo sapiens bromodomain and WD repeat domain containing 3 (BRWD3), mRNA [NM_153252] | 254065 |
| A_32_P489130 | 1.3  | -1.3 | -2.0 | -1.3 | BRWD3 | Homo sapiens bromodomain and WD repeat domain containing 3 (BRWD3), mRNA [NM_153252] | 254065 |

|              |      |      |      |      |         |                                                                                                 |           |
|--------------|------|------|------|------|---------|-------------------------------------------------------------------------------------------------|-----------|
| A_24_P127602 | -2.0 | -1.5 | -4.2 | 1.3  | BSN-AS2 | Homo sapiens BSN antisense RNA 2 (non-protein coding) (BSN-AS2), non-coding RNA [NR_038866]     | 100132677 |
| A_24_P180849 | -3.6 | 1.3  | -2.6 | -1.2 | BSPRY   | Homo sapiens B-box and SPRY domain containing (BSPRY), mRNA [NM_017688]                         | 54836     |
| A_23_P39465  | 1.2  | -2.0 | 1.4  | 1.1  | BST2    | Homo sapiens bone marrow stromal cell antigen 2 (BST2), mRNA [NM_004335]                        | 684       |
| A_23_P419714 | -1.6 | -1.6 | -1.8 | -2.2 | BTBD11  | Homo sapiens BTB (POZ) domain containing 11 (BTBD11), transcript variant a, mRNA [NM_001018072] | 121551    |

|              |      |      |      |      |        |                                                                                            |        |
|--------------|------|------|------|------|--------|--------------------------------------------------------------------------------------------|--------|
| A_23_P383915 | 3.4  | 2.7  | 1.4  | 1.9  | BTBD16 | Homo sapiens BTB (POZ) domain containing 16 (BTBD16), mRNA [NM_144587]                     | 118663 |
| A_23_P153698 | 1.6  | 1.6  | -2.3 | -1.4 | BTBD2  | Homo sapiens BTB (POZ) domain containing 2 (BTBD2), mRNA [NM_017797]                       | 55643  |
| A_23_P99614  | 1.4  | 1.5  | 1.9  | 2.0  | BTBD6  | Homo sapiens BTB (POZ) domain containing 6 (BTBD6), mRNA [NM_033271]                       | 90135  |
| A_23_P88184  | 11.7 | 11.1 | 10.7 | 10.7 | BTBD7  | Homo sapiens BTB (POZ) domain containing 7 (BTBD7), transcript variant 2, mRNA [NM_018167] | 55727  |



|              |      |      |      |      |       |                                                                                             |        |
|--------------|------|------|------|------|-------|---------------------------------------------------------------------------------------------|--------|
| A_24_P564030 | 1.1  | -2.6 | -1.0 | -1.0 | BTBD8 | Homo sapiens BTB (POZ) domain containing 8 (BTBD8), mRNA [NM_183242]                        | 284697 |
| A_32_P94722  | -2.7 | 1.1  | 1.0  | -1.3 | BTBD9 | Homo sapiens BTB (POZ) domain containing 9 (BTBD9), transcript variant 1, mRNA [NM_052893]  | 114781 |
| A_32_P217401 | -1.0 | -1.0 | -1.0 | -7.3 | BTBD9 | Homo sapiens BTB (POZ) domain containing 9 (BTBD9), transcript variant 1, mRNA [NM_052893]  | 114781 |
| A_32_P108505 | -2.1 | 4.2  | 1.1  | -7.4 | BTF3  | Homo sapiens basic transcription factor 3 (BTF3), transcript variant 1, mRNA [NM_001037637] | 689    |

|              |      |      |      |      |         |                                                                                                               |       |
|--------------|------|------|------|------|---------|---------------------------------------------------------------------------------------------------------------|-------|
| A_32_P33723  | 1.1  | -3.5 | -1.6 | -1.4 | BTG3    | Homo sapiens BTG family, member 3, mRNA (cDNA clone IMAGE:5240818), with apparent retained intron. [BC028229] | 10950 |
| A_23_P80068  | -2.7 | 1.2  | 1.1  | 1.0  | BTG3    | Homo sapiens BTG family, member 3 (BTG3), transcript variant 2, mRNA [NM_006806]                              | 10950 |
| A_24_P136470 | -2.1 | -1.5 | -1.3 | -3.3 | BTN2A3P | Homo sapiens butyrophilin, subfamily 2, member A3, pseudogene (BTN2A3P), non-coding RNA [NR_027795]           | 54718 |

|              |      |       |      |      |        |                                                                                                    |       |
|--------------|------|-------|------|------|--------|----------------------------------------------------------------------------------------------------|-------|
| A_24_P126282 | -1.0 | -1.3  | -3.4 | -1.0 | BTN3A1 | Homo sapiens butyrophilin, subfamily 3, member A1 (BTN3A1), transcript variant 1, mRNA [NM_007048] | 11119 |
| A_23_P214499 | -1.0 | -29.7 | -1.0 | 1.1  | BTN3A1 | Homo sapiens butyrophilin, subfamily 3, member A1 (BTN3A1), transcript variant 1, mRNA [NM_007048] | 11119 |
| A_23_P376686 | -2.1 | 1.4   | 2.5  | -1.1 | BTNL2  | Homo sapiens butyrophilin-like 2 (MHC class II associated) (BTNL2), mRNA [NM_019602]               | 56244 |

|              |      |      |      |     |       |                                                                                                     |       |
|--------------|------|------|------|-----|-------|-----------------------------------------------------------------------------------------------------|-------|
| A_23_P35427  | 2.2  | -1.5 | -1.2 | 1.4 | BTRC  | Homo sapiens beta-transducin repeat containing (BTRC), transcript variant 1, mRNA [NM_033637]       | 8945  |
| A_23_P163481 | 3.0  | -4.4 | 2.4  | 1.2 | BUB1B | Homo sapiens budding uninhibited by benzimidazoles 1 homolog beta (yeast) (BUB1B), mRNA [NM_001211] | 701   |
| A_32_P181638 | -2.2 | -2.2 | 1.2  | 2.9 | BVES  | Homo sapiens blood vessel epicardial substance (BVES), transcript variant B, mRNA [NM_147147]       | 11149 |

|              |      |      |      |      |        |                                                                                                                         |       |
|--------------|------|------|------|------|--------|-------------------------------------------------------------------------------------------------------------------------|-------|
| A_23_P502783 | -1.0 | -2.4 | -2.2 | -1.1 | BVES   | Homo sapiens blood vessel epicardial substance (BVES), transcript variant B, mRNA [NM_147147]                           | 11149 |
| A_23_P145197 | 1.3  | 1.1  | -1.0 | -2.2 | BYSL   | Homo sapiens bystin-like (BYSL), mRNA [NM_004053]                                                                       | 705   |
| A_24_P113131 | 2.8  | -1.1 | -1.1 | -1.1 | BZRAP1 | Homo sapiens benzodiazepine receptor (peripheral) associated protein 1 (BZRAP1), transcript variant 1, mRNA [NM_004758] | 9256  |
| A_23_P152559 | 2.0  | 3.6  | 4.8  | 8.1  | BZRAP1 | Homo sapiens peripheral benzodiazepine receptor interacting protein mRNA, complete cds. [AF039571]                      | 9256  |

|              |      |      |      |      |      |                                                                                                   |       |
|--------------|------|------|------|------|------|---------------------------------------------------------------------------------------------------|-------|
| A_24_P924389 | -2.4 | -3.6 | -2.3 | -1.3 | BZW1 | Homo sapiens basic leucine zipper and W2 domains 1 (BZW1), transcript variant 4, mRNA [NM_014670] | 9689  |
| A_23_P168916 | -2.0 | -3.1 | -2.2 | -4.7 | CA1  | Homo sapiens carbonic anhydrase I (CA1), transcript variant 2, mRNA [NM_001738]                   | 759   |
| A_23_P207461 | -1.3 | -3.2 | -1.3 | -1.3 | CA10 | Homo sapiens carbonic anhydrase X (CA10), transcript variant 2, mRNA [NM_020178]                  | 56934 |
| A_23_P163338 | 1.0  | 1.1  | -9.2 | -1.4 | CA12 | carbonic anhydrase XII [Source:HGNC Symbol;Acc:1371] [ENST00000178638]                            | 771   |

|              |     |       |      |      |      |                                                                                                                         |       |
|--------------|-----|-------|------|------|------|-------------------------------------------------------------------------------------------------------------------------|-------|
| A_23_P63379  | 1.5 | 3.1   | 2.2  | 3.4  | CA14 | Homo sapiens carbonic anhydrase XIV (CA14), mRNA [NM_012113]                                                            | 23632 |
| A_23_P95683  | 1.6 | 1.4   | -3.2 | 1.3  | CA5A | Homo sapiens carbonic anhydrase VA, mitochondrial (CA5A), nuclear gene encoding mitochondrial protein, mRNA [NM_001739] | 763   |
| A_24_P941268 | 1.1 | -19.9 | -1.0 | -1.0 | CA5B | Homo sapiens carbonic anhydrase VB, mitochondrial (CA5B), nuclear gene encoding mitochondrial protein, mRNA [NM_007220] | 11238 |

|              |     |      |      |     |        |                                                                                               |       |
|--------------|-----|------|------|-----|--------|-----------------------------------------------------------------------------------------------|-------|
| A_24_P376760 | 9.4 | 4.5  | 4.4  | 4.3 | CA6    | Homo sapiens carbonic anhydrase VI (CA6), mRNA [NM_001215]                                    | 765   |
| A_23_P106656 | 3.0 | 2.6  | -1.5 | 1.5 | CA7    | Homo sapiens carbonic anhydrase VII (CA7), transcript variant 2, mRNA [NM_001014435]          | 766   |
| A_23_P157793 | 2.4 | -1.0 | 2.4  | 3.0 | CA9    | Homo sapiens carbonic anhydrase IX (CA9), mRNA [NM_001216]                                    | 768   |
| A_23_P204879 | 4.7 | 2.8  | 4.7  | 2.7 | CAB39L | Homo sapiens calcium binding protein 39-like (CAB39L), transcript variant 1, mRNA [NM_030925] | 81617 |



|              |      |      |      |       |         |                                                                                             |       |
|--------------|------|------|------|-------|---------|---------------------------------------------------------------------------------------------|-------|
| A_24_P336113 | 3.3  | -3.5 | 1.6  | 2.3   | CABIN1  | Homo sapiens calcineurin binding protein 1 (CABIN1), transcript variant 2, mRNA [NM_012295] | 23523 |
| A_23_P307761 | 2.2  | 1.2  | 2.5  | 1.8   | CABLES2 | Homo sapiens Cdk5 and Abl enzyme substrate 2 (CABLES2), mRNA [NM_031215]                    | 81928 |
| A_23_P308021 | 1.0  | -2.9 | -1.1 | 1.0   | CABP4   | Homo sapiens calcium binding protein 4 (CABP4), mRNA [NM_145200]                            | 57010 |
| A_24_P388662 | -2.6 | -1.8 | -1.9 | -60.8 | CABS1   | Homo sapiens calcium-binding protein, spermatid-specific 1 (CABS1), mRNA [NM_033122]        | 85438 |

|              |     |      |     |      |         |                                                                                                                               |       |
|--------------|-----|------|-----|------|---------|-------------------------------------------------------------------------------------------------------------------------------|-------|
| A_24_P943922 | 5.1 | 5.1  | 5.0 | 3.9  | CACHD1  | Homo sapiens cache domain containing 1 (CACHD1), mRNA [NM_020925]                                                             | 57685 |
| A_24_P130559 | 1.4 | -2.1 | 2.5 | -1.1 | CACNA1A | Homo sapiens calcium channel, voltage-dependent, P/Q type, alpha 1A subunit (CACNA1A), transcript variant 1, mRNA [NM_000068] | 773   |
| A_23_P159622 | 1.2 | 3.7  | 1.0 | 1.1  | CACNA1B | Homo sapiens calcium channel, voltage-dependent, N type, alpha 1B subunit (CACNA1B), transcript variant 1, mRNA [NM_000718]   | 774   |

|              |      |      |      |     |         |                                                                                                                                |     |
|--------------|------|------|------|-----|---------|--------------------------------------------------------------------------------------------------------------------------------|-----|
| A_24_P160716 | -1.3 | -1.3 | -2.8 | 1.0 | CACNA1B | calcium channel, voltage-dependent, N type, alpha 1B subunit [Source:HGNC Symbol;Acc:1389] [ENST00000277550]                   | 774 |
| A_32_P153773 | -2.4 | 1.0  | -1.1 | 1.3 | CACNA1B | Homo sapiens calcium channel, voltage-dependent, N type, alpha 1B subunit (CACNA1B), transcript variant 1, mRNA [NM_000718]    | 774 |
| A_23_P84849  | 6.5  | 5.9  | 2.2  | 7.1 | CACNA1B | Homo sapiens calcium channel, voltage-dependent, N type, alpha 1B subunit (CACNA1B), transcript variant 2, mRNA [NM_001243812] | 774 |

|              |      |     |      |      |         |                                                                                                                              |      |
|--------------|------|-----|------|------|---------|------------------------------------------------------------------------------------------------------------------------------|------|
| A_23_P34554  | 1.8  | 1.1 | -1.1 | -4.5 | CACNA1E | Homo sapiens calcium channel, voltage-dependent, R type, alpha 1E subunit (CACNA1E), transcript variant 3, mRNA [NM_000721]  | 777  |
| A_24_P911621 | -3.1 | 1.3 | 2.0  | -3.0 | CACNA1E | calcium channel, voltage-dependent, R type, alpha 1E subunit [Source:HGNC Symbol;Acc:1392] [ENST00000524607]                 | 777  |
| A_24_P401686 | 1.5  | 2.2 | 2.5  | -1.0 | CACNA1G | Homo sapiens calcium channel, voltage-dependent, T type, alpha 1G subunit (CACNA1G), transcript variant 15, mRNA [NM_198397] | 8913 |

|              |      |      |      |      |         |                                                                                                                             |      |
|--------------|------|------|------|------|---------|-----------------------------------------------------------------------------------------------------------------------------|------|
| A_23_P107247 | 1.7  | 1.6  | 3.4  | 1.0  | CACNA1G | Homo sapiens calcium channel, voltage-dependent, T type, alpha 1G subunit (CACNA1G), transcript variant 1, mRNA [NM_018896] | 8913 |
| A_23_P3483   | 4.4  | 1.6  | 1.4  | 1.1  | CACNA1H | Homo sapiens calcium channel, voltage-dependent, T type, alpha 1H subunit (CACNA1H), transcript variant 1, mRNA [NM_021098] | 8912 |
| A_24_P399871 | -1.7 | -1.4 | -3.6 | -1.8 | CACNA1I | Homo sapiens calcium channel, voltage-dependent, T type, alpha 1I subunit (CACNA1I), transcript variant 1, mRNA [NM_021096] | 8911 |

|              |     |      |      |      |          |                                                                                                                                |       |
|--------------|-----|------|------|------|----------|--------------------------------------------------------------------------------------------------------------------------------|-------|
| A_23_P346900 | 1.0 | 1.1  | 1.8  | -4.5 | CACNA2D2 | Homo sapiens calcium channel, voltage-dependent, alpha 2/delta subunit 2 (CACNA2D2), transcript variant 1, mRNA [NM_001005505] | 9254  |
| A_24_P402825 | 2.0 | 2.0  | 2.1  | 1.0  | CACNA2D3 | Homo sapiens calcium channel, voltage-dependent, alpha 2/delta subunit 3 (CACNA2D3), mRNA [NM_018398]                          | 55799 |
| A_23_P353014 | 1.0 | -5.7 | -1.1 | -1.1 | CACNA2D4 | Homo sapiens calcium channel, voltage-dependent, alpha 2/delta subunit 4 (CACNA2D4), mRNA [NM_172364]                          | 93589 |

|              |     |      |      |      |        |                                                                                                                  |     |
|--------------|-----|------|------|------|--------|------------------------------------------------------------------------------------------------------------------|-----|
| A_24_P91165  | 2.2 | -2.1 | -1.6 | 2.2  | CACNB1 | Homo sapiens calcium channel, voltage-dependent, beta 1 subunit (CACNB1), transcript variant 3, mRNA [NM_199248] | 782 |
| A_23_P371794 | 1.3 | 2.6  | 2.4  | 4.4  | CACNB3 | Homo sapiens calcium channel, voltage-dependent, beta 3 subunit (CACNB3), transcript variant 1, mRNA [NM_000725] | 784 |
| A_23_P204016 | 1.1 | 2.0  | -1.1 | -1.0 | CACNB3 | Homo sapiens calcium channel, voltage-dependent, beta 3 subunit (CACNB3), transcript variant 1, mRNA [NM_000725] | 784 |

|              |      |      |      |      |        |                                                                                             |       |
|--------------|------|------|------|------|--------|---------------------------------------------------------------------------------------------|-------|
| A_23_P66180  | 2.2  | 2.5  | -1.1 | 1.2  | CACNG3 | Homo sapiens calcium channel, voltage-dependent, gamma subunit 3 (CACNG3), mRNA [NM_006539] | 10368 |
| A_24_P70303  | 1.5  | 2.8  | 2.2  | 1.7  | CACNG4 | Homo sapiens calcium channel, voltage-dependent, gamma subunit 4 (CACNG4), mRNA [NM_014405] | 27092 |
| A_23_P414328 | -1.5 | -2.3 | -1.0 | -1.5 | CACNG5 | Homo sapiens calcium channel, voltage-dependent, gamma subunit 5 (CACNG5), mRNA [NM_145811] | 27091 |
| A_23_P4782   | -1.4 | -5.1 | 1.0  | -1.3 | CACNG7 | Homo sapiens calcium channel, voltage-dependent, gamma subunit 7 (CACNG7), mRNA [NM_031896] | 59284 |



|              |      |      |      |      |        |                                                                                             |        |
|--------------|------|------|------|------|--------|---------------------------------------------------------------------------------------------|--------|
| A_23_P420218 | -1.4 | -1.4 | -5.7 | -1.8 | CACNG8 | Homo sapiens calcium channel, voltage-dependent, gamma subunit 8 (CACNG8), mRNA [NM_031895] | 59283  |
| A_32_P114574 | -1.5 | -2.0 | -2.6 | -1.3 | CACYBP | Homo sapiens calyculin binding protein (CACYBP), transcript variant 1, mRNA [NM_014412]     | 27101  |
| A_24_P84428  | -1.8 | -1.9 | -2.0 | -1.9 | CACYBP | Homo sapiens calyculin binding protein (CACYBP), transcript variant 1, mRNA [NM_014412]     | 27101  |
| A_32_P129200 | -1.0 | -2.6 | -1.1 | -1.1 | CADM2  | Homo sapiens cell adhesion molecule 2 (CADM2), transcript variant 3, mRNA [NM_153184]       | 253559 |

|              |      |     |     |      |        |                                                                                                                 |        |
|--------------|------|-----|-----|------|--------|-----------------------------------------------------------------------------------------------------------------|--------|
| A_23_P201156 | -2.1 | 1.9 | 1.9 | -1.4 | CADM3  | Homo sapiens cell adhesion molecule 3 (CADM3), transcript variant 1, mRNA [NM_021189]                           | 57863  |
| A_23_P5064   | 2.1  | 4.0 | 1.9 | 1.2  | CADM4  | Homo sapiens cell adhesion molecule 4 (CADM4), mRNA [NM_145296]                                                 | 199731 |
| A_24_P246710 | 2.2  | 3.1 | 3.4 | 2.8  | CADPS2 | Homo sapiens Ca <sup>++</sup> -dependent secretion activator 2 (CADPS2), transcript variant 1, mRNA [NM_017954] | 93664  |
| A_23_P43197  | 5.3  | 2.6 | 2.8 | 3.0  | CALB1  | Homo sapiens calbindin 1, 28kDa (CALB1), mRNA [NM_004929]                                                       | 793    |

|              |      |      |      |      |       |                                                                                                         |     |
|--------------|------|------|------|------|-------|---------------------------------------------------------------------------------------------------------|-----|
| A_23_P21092  | 2.8  | 1.3  | 2.4  | 2.4  | CALB2 | Homo sapiens calbindin 2 (CALB2), transcript variant CALB2, mRNA [NM_001740]                            | 794 |
| A_24_P936884 | -1.0 | -1.0 | -2.3 | -2.3 | CALD1 | Homo sapiens cDNA FLJ12160 fis, clone MAMMA1000567. [AK022222]                                          | 800 |
| A_23_P163178 | 1.1  | 1.5  | -2.0 | 1.0  | CALM1 | Homo sapiens calmodulin 1 (phosphorylase kinase, delta) (CALM1), transcript variant 1, mRNA [NM_006888] | 801 |
| A_24_P219785 | -1.6 | -4.0 | -3.1 | -1.3 | CALM3 | Homo sapiens calmodulin 3 (phosphorylase kinase, delta) (CALM3), mRNA [NM_005184]                       | 808 |

|              |      |      |      |      |        |                                                                                   |        |
|--------------|------|------|------|------|--------|-----------------------------------------------------------------------------------|--------|
| A_23_P4944   | -1.4 | -1.2 | -1.6 | -2.4 | CALM3  | Homo sapiens calmodulin 3 (phosphorylase kinase, delta) (CALM3), mRNA [NM_005184] | 808    |
| A_23_P393080 | -1.2 | 1.0  | -2.1 | -1.3 | CALML3 | Homo sapiens calmodulin-like 3 (CALML3), mRNA [NM_005185]                         | 810    |
| A_23_P129188 | 2.6  | 1.9  | 2.0  | 2.8  | CALML4 | Homo sapiens calmodulin-like 4 (CALML4), transcript variant 1, mRNA [NM_033429]   | 91860  |
| A_23_P124095 | -1.1 | 1.1  | 1.0  | 2.6  | CALML5 | Homo sapiens calmodulin-like 5 (CALML5), mRNA [NM_017422]                         | 51806  |
| A_23_P62588  | -1.0 | -1.0 | -3.0 | -1.0 | CALML6 | Homo sapiens calmodulin-like 6 (CALML6), mRNA [NM_138705]                         | 163688 |

|              |      |      |      |      |       |                                                                                 |        |
|--------------|------|------|------|------|-------|---------------------------------------------------------------------------------|--------|
| A_24_P380567 | 2.8  | 1.3  | 1.0  | 1.7  | CALN1 | Homo sapiens calneuron 1 (CALN1), transcript variant 1, mRNA [NM_031468]        | 83698  |
| A_23_P27538  | -3.7 | 1.5  | -5.7 | -2.1 | CALR3 | Homo sapiens calreticulin 3 (CALR3), mRNA [NM_145046]                           | 125972 |
| A_23_P122815 | 6.9  | 1.5  | 10.1 | 16.4 | CALU  | Homo sapiens calumenin (CALU), transcript variant 1, mRNA [NM_001219]           | 813    |
| A_23_P86561  | 2.4  | -1.0 | 1.3  | 2.1  | CALY  | Homo sapiens calcyon neuron-specific vesicular protein (CALY), mRNA [NM_015722] | 50632  |

|              |      |      |      |     |        |                                                                                                                    |      |
|--------------|------|------|------|-----|--------|--------------------------------------------------------------------------------------------------------------------|------|
| A_23_P121215 | 1.2  | 1.7  | -2.7 | 1.7 | CAMK1  | Homo sapiens calcium/calmodulin-dependent protein kinase I (CAMK1), mRNA [NM_003656]                               | 8536 |
| A_24_P114739 | 1.9  | -2.0 | 1.6  | 2.4 | CAMK2D | Homo sapiens calcium/calmodulin-dependent protein kinase II delta (CAMK2D), transcript variant 1, mRNA [NM_172127] | 817  |
| A_23_P144458 | -1.3 | 1.7  | 2.5  | 1.6 | CAMK2D | Homo sapiens calcium/calmodulin-dependent protein kinase II delta (CAMK2D), transcript variant 3, mRNA [NM_001221] | 817  |

|              |      |      |       |      |         |                                                                                                                    |       |
|--------------|------|------|-------|------|---------|--------------------------------------------------------------------------------------------------------------------|-------|
| A_23_P46903  | 1.0  | -1.4 | -30.6 | 1.4  | CAMK2G  | Homo sapiens calcium/calmodulin-dependent protein kinase II gamma (CAMK2G), transcript variant 1, mRNA [NM_172171] | 818   |
| A_24_P141332 | -1.1 | -1.1 | -2.3  | 1.0  | CAMK2G  | Homo sapiens calcium/calmodulin-dependent protein kinase II gamma (CAMK2G), transcript variant 1, mRNA [NM_172171] | 818   |
| A_24_P117620 | -1.5 | 1.0  | -1.6  | -2.4 | CAMK2N1 | Homo sapiens calcium/calmodulin-dependent protein kinase II inhibitor 1 (CAMK2N1), mRNA [NM_018584]                | 55450 |

|              |     |      |      |     |         |                                                                                                                           |       |
|--------------|-----|------|------|-----|---------|---------------------------------------------------------------------------------------------------------------------------|-------|
| A_32_P57146  | 1.3 | 2.5  | 1.2  | 1.8 | CAMK2N1 | Homo sapiens PRO1489 mRNA, complete cds. [AF116637]                                                                       | 55450 |
| A_23_P250347 | 1.1 | -9.0 | -1.4 | 1.3 | CAMK4   | Homo sapiens calcium/calmodulin-dependent protein kinase IV (CAMK4), mRNA [NM_001744]                                     | 814   |
| A_23_P207648 | 1.0 | 2.3  | -1.2 | 1.3 | CAMKK1  | Homo sapiens calcium/calmodulin-dependent protein kinase kinase 1, alpha (CAMKK1), transcript variant 1, mRNA [NM_032294] | 84254 |



|              |      |      |      |      |        |                                                                                                                          |       |
|--------------|------|------|------|------|--------|--------------------------------------------------------------------------------------------------------------------------|-------|
| A_23_P408830 | 1.7  | 2.6  | 1.9  | 1.0  | CAMKK2 | Homo sapiens calcium/calmodulin-dependent protein kinase kinase 2, beta (CAMKK2), transcript variant 6, mRNA [NM_172215] | 10645 |
| A_23_P153941 | 2.7  | 1.1  | -1.4 | 1.1  | CAMKMT | Homo sapiens calmodulin-lysine N-methyltransferase (CAMKMT), mRNA [NM_024766]                                            | 79823 |
| A_24_P926285 | -1.6 | -1.6 | -1.6 | -3.4 | CAMKMT | Homo sapiens chromosome 2 open reading frame 34, mRNA (cDNA clone IMAGE:4673016), complete cds. [BC029359]               | 79823 |

|              |      |       |      |      |       |                                                                           |       |
|--------------|------|-------|------|------|-------|---------------------------------------------------------------------------|-------|
| A_23_P29680  | 1.0  | -28.1 | -1.1 | -1.1 | CAMKV | Homo sapiens CaM kinase-like vesicle-associated (CAMKV), mRNA [NM_024046] | 79012 |
| A_24_P234856 | 5.0  | 4.9   | 4.7  | 4.1  | CAMLG | Homo sapiens calcium modulating ligand (CAMLG), mRNA [NM_001745]          | 819   |
| A_23_P213728 | 2.2  | 2.7   | 2.9  | 2.2  | CAMLG | Homo sapiens calcium modulating ligand (CAMLG), mRNA [NM_001745]          | 819   |
| A_23_P253791 | -1.6 | 1.0   | -1.0 | 2.6  | CAMP  | Homo sapiens cathelicidin antimicrobial peptide (CAMP), mRNA [NM_004345]  | 820   |

|              |      |      |     |     |         |                                                                                                                                     |        |
|--------------|------|------|-----|-----|---------|-------------------------------------------------------------------------------------------------------------------------------------|--------|
| A_24_P175460 | -1.2 | -8.4 | 1.4 | 1.5 | CAMSAP1 | Homo sapiens calmodulin regulated spectrin-associated protein 1 (CAMSAP1), mRNA [NM_015447]                                         | 157922 |
| A_23_P406702 | 2.2  | 3.4  | 2.5 | 2.1 | CAMSAP2 | Homo sapiens calmodulin regulated spectrin-associated protein family, member 2 (CAMSAP2), mRNA [NM_203459]                          | 23271  |
| A_23_P394043 | 1.3  | 3.8  | 4.9 | 1.1 | CAMSAP3 | Homo sapiens calmodulin regulated spectrin-associated protein family, member 3 (CAMSAP3), transcript variant 1, mRNA [NM_001080429] | 57662  |

|              |      |      |      |      |        |                                                                                                               |       |
|--------------|------|------|------|------|--------|---------------------------------------------------------------------------------------------------------------|-------|
| A_24_P302406 | -2.3 | -1.0 | 1.4  | 1.4  | CAMTA1 | Homo sapiens calmodulin binding transcription activator 1 (CAMTA1), transcript variant 3, mRNA [NM_001242701] | 23261 |
| A_24_P220921 | 1.2  | -3.4 | -1.2 | -1.1 | CAMTA1 | Homo sapiens calmodulin binding transcription activator 1 (CAMTA1), transcript variant 1, mRNA [NM_015215]    | 23261 |
| A_23_P365189 | 2.5  | 2.4  | 1.6  | -1.1 | CAMTA2 | Homo sapiens calmodulin binding transcription activator 2 (CAMTA2), transcript variant 1, mRNA [NM_015099]    | 23125 |

|              |     |     |      |     |       |                                                                                               |        |
|--------------|-----|-----|------|-----|-------|-----------------------------------------------------------------------------------------------|--------|
| A_23_P25137  | 1.5 | 6.1 | 1.9  | 3.0 | CAND1 | Homo sapiens cullin-associated and neddylation-dissociated 1 (CAND1), mRNA [NM_018448]        | 55832  |
| A_23_P72180  | 1.1 | 2.0 | 1.0  | 1.1 | CAND1 | Homo sapiens TIP120 protein (TIP120) mRNA, complete cds. [AF157326]                           | 55832  |
| A_23_P25141  | 1.9 | 2.0 | -2.0 | 2.2 | CAND1 | Homo sapiens cullin-associated and neddylation-dissociated 1 (CAND1), mRNA [NM_018448]        | 55832  |
| A_24_P116669 | 2.2 | 3.2 | 1.3  | 2.3 | CANT1 | Homo sapiens calcium activated nucleotidase 1 (CANT1), transcript variant 1, mRNA [NM_138793] | 124583 |

|              |      |      |      |      |      |                                                                                                                 |       |
|--------------|------|------|------|------|------|-----------------------------------------------------------------------------------------------------------------|-------|
| A_23_P147185 | 1.5  | -1.0 | -2.0 | -1.0 | CANX | Homo sapiens calnexin (CANX), transcript variant 1, mRNA [NM_001746]                                            | 821   |
| A_24_P62615  | -1.6 | -1.4 | -2.1 | 1.2  | CAP1 | Homo sapiens CAP, adenylate cyclase-associated protein 1 (yeast) (CAP1), transcript variant 1, mRNA [NM_006367] | 10487 |
| A_23_P421664 | 1.5  | -6.5 | 1.3  | 1.3  | CAP2 | Homo sapiens CAP, adenylate cyclase-associated protein, 2 (yeast) (CAP2), mRNA [NM_006366]                      | 10486 |
| A_23_P165636 | 3.9  | -1.9 | 1.7  | 2.7  | CAPG | Homo sapiens capping protein (actin filament), gelsolin-like (CAPG), mRNA [NM_001747]                           | 822   |

|              |      |       |      |      |        |                                                                               |        |
|--------------|------|-------|------|------|--------|-------------------------------------------------------------------------------|--------|
| A_23_P312217 | -2.5 | -3.5  | -2.3 | -1.6 | CAPN10 | Homo sapiens calpain 10 (CAPN10), transcript variant 1, mRNA [NM_023083]      | 11132  |
| A_23_P7853   | -1.2 | -11.2 | -1.3 | -1.4 | CAPN11 | Homo sapiens calpain 11 (CAPN11), mRNA [NM_007058]                            | 11131  |
| A_23_P16409  | -2.1 | -1.6  | -8.6 | -2.0 | CAPN12 | Homo sapiens calpain 12 (CAPN12), mRNA [NM_144691]                            | 147968 |
| A_23_P101972 | 2.2  | -1.1  | 2.6  | 1.5  | CAPN13 | Homo sapiens calpain 13 (CAPN13), mRNA [NM_144575]                            | 92291  |
| A_32_P167076 | -1.4 | -4.6  | -1.1 | -1.5 | CAPN14 | Homo sapiens calpain 14 (CAPN14), mRNA [NM_001145122]                         | 440854 |
| A_23_P218190 | 2.1  | 1.2   | 2.8  | 2.1  | CAPN3  | Homo sapiens calpain 3, (p94) (CAPN3), transcript variant 1, mRNA [NM_000070] | 825    |

|              |      |      |      |      |         |                                                                                                |        |
|--------------|------|------|------|------|---------|------------------------------------------------------------------------------------------------|--------|
| A_23_P105197 | -2.1 | -1.0 | 1.3  | -3.0 | CAPN5   | Homo sapiens calpain 5 (CAPN5), mRNA [NM_004055]                                               | 726    |
| A_23_P83381  | 1.0  | 1.0  | 2.3  | -1.9 | CAPN8   | Homo sapiens calpain 8 (CAPN8), mRNA [NM_001143962]                                            | 388743 |
| A_24_P107208 | -4.6 | -1.2 | -4.3 | -1.3 | CAPRIN1 | Homo sapiens cell cycle associated protein 1 (CAPRIN1), transcript variant 2, mRNA [NM_203364] | 4076   |
| A_32_P235872 | -9.0 | -1.1 | 1.0  | -1.0 | CAPRIN1 | Homo sapiens cell cycle associated protein 1 (CAPRIN1), transcript variant 1, mRNA [NM_005898] | 4076   |



|              |      |      |      |      |         |                                                                                                |       |
|--------------|------|------|------|------|---------|------------------------------------------------------------------------------------------------|-------|
| A_23_P98722  | 2.7  | 3.0  | 3.0  | 2.6  | CAPRIN1 | Homo sapiens cell cycle associated protein 1 (CAPRIN1), transcript variant 1, mRNA [NM_005898] | 4076  |
| A_24_P400675 | -1.0 | 2.5  | 1.4  | 1.2  | CAPRIN2 | Homo sapiens caprin family member 2 (CAPRIN2), transcript variant 2, mRNA [NM_023925]          | 65981 |
| A_23_P87532  | -1.4 | -1.3 | -1.1 | -2.6 | CAPRIN2 | Homo sapiens caprin family member 2 (CAPRIN2), transcript variant 1, mRNA [NM_001002259]       | 65981 |
| A_23_P78958  | 1.1  | -1.9 | -2.0 | -8.7 | CAPS    | Homo sapiens calcyphosine (CAPS), transcript variant 1, mRNA [NM_004058]                       | 828   |

|              |      |      |      |      |        |                                                                                                 |       |
|--------------|------|------|------|------|--------|-------------------------------------------------------------------------------------------------|-------|
| A_23_P380379 | 1.0  | -2.7 | -1.7 | -1.0 | CAPS2  | calcyphosine 2<br>[Source:HGNC<br>Symbol;Acc:16471]<br>[ENST00000328705]                        | 84698 |
| A_24_P379379 | -2.3 | -5.1 | -2.7 | -1.1 | CAPZA1 | Homo sapiens capping protein (actin filament) muscle Z-line, alpha 1 (CAPZA1), mRNA [NM_006135] | 829   |
| A_23_P307940 | -1.1 | -7.0 | -1.3 | -2.0 | CAPZA2 | Homo sapiens capping protein (actin filament) muscle Z-line, alpha 2 (CAPZA2), mRNA [NM_006136] | 830   |
| A_23_P87727  | 4.0  | 3.8  | 3.4  | 2.9  | CAPZA3 | Homo sapiens capping protein (actin filament) muscle Z-line, alpha 3 (CAPZA3), mRNA [NM_033328] | 93661 |

|              |      |      |      |      |        |                                                                                                            |       |
|--------------|------|------|------|------|--------|------------------------------------------------------------------------------------------------------------|-------|
| A_23_P82324  | -1.5 | -8.2 | -5.4 | -2.8 | CARD11 | Homo sapiens caspase recruitment domain family, member 11 (CARD11), mRNA [NM_032415]                       | 84433 |
| A_23_P320070 | 1.2  | 1.1  | -4.1 | -1.2 | CARD14 | Homo sapiens caspase recruitment domain family, member 14 (CARD14), transcript variant 2, mRNA [NM_052819] | 79092 |
| A_23_P207879 | 11.9 | 7.9  | 9.6  | 1.2  | CARD14 | Homo sapiens caspase recruitment domain family, member 14 (CARD14), transcript variant 1, mRNA [NM_024110] | 79092 |

|              |      |      |      |      |        |                                                                                                               |        |
|--------------|------|------|------|------|--------|---------------------------------------------------------------------------------------------------------------|--------|
| A_23_P64173  | 1.1  | 1.0  | -3.4 | -1.0 | CARD16 | Homo sapiens caspase recruitment domain family, member 16 (CARD16), transcript variant 1, mRNA [NM_001017534] | 114769 |
| A_24_P192805 | -1.1 | 1.1  | 1.0  | -3.0 | CARD17 | Homo sapiens caspase recruitment domain family, member 17 (CARD17), mRNA [NM_001007232]                       | 440068 |
| A_23_P86975  | -4.3 | -1.2 | -1.3 | -1.7 | CARD18 | Homo sapiens caspase recruitment domain family, member 18 (CARD18), mRNA [NM_021571]                          | 59082  |

|              |      |      |      |      |         |                                                                                                                  |       |
|--------------|------|------|------|------|---------|------------------------------------------------------------------------------------------------------------------|-------|
| A_24_P180830 | 1.1  | 1.4  | 1.8  | 5.4  | CARD9   | caspase recruitment domain family, member 9 [Source:HGNC Symbol;Acc:16391] [ENST00000481053]                     | 64170 |
| A_23_P38085  | 3.7  | 5.4  | 3.4  | 1.9  | CARHSP1 | Homo sapiens calcium regulated heat stable protein 1, 24kDa (CARHSP1), transcript variant 2, mRNA [NM_001042476] | 23589 |
| A_24_P401709 | -1.4 | 4.1  | 1.6  | -3.4 | CARKD   | Homo sapiens clone 664 unknown mRNA, partial sequence. [AF091088]                                                | 55739 |
| A_24_P95439  | -4.1 | -6.7 | -1.7 | -2.0 | CARS    | Homo sapiens cysteinyl-tRNA synthetase (CARS), transcript variant 3, mRNA [NM_001014437]                         | 833   |

|              |     |      |      |      |        |                                                                                                                                           |       |
|--------------|-----|------|------|------|--------|-------------------------------------------------------------------------------------------------------------------------------------------|-------|
| A_23_P128624 | 1.1 | 2.1  | 1.4  | 1.1  | CARS2  | Homo sapiens cysteinyl-tRNA synthetase 2, mitochondrial (putative) (CARS2), nuclear gene encoding mitochondrial protein, mRNA [NM_024537] | 79587 |
| A_23_P167493 | 1.1 | 2.1  | 1.0  | 1.1  | CARTPT | Homo sapiens CART prepropeptide (CARTPT), mRNA [NM_004291]                                                                                | 9607  |
| A_24_P125353 | 2.3 | -2.0 | -2.0 | -1.3 | CASC3  | Homo sapiens cancer susceptibility candidate 3 (CASC3), mRNA [NM_007359]                                                                  | 22794 |
| A_23_P374288 | 1.2 | 2.3  | 1.1  | 1.6  | CASC3  | Homo sapiens cancer susceptibility candidate 3 (CASC3), mRNA [NM_007359]                                                                  | 22794 |

|              |     |      |     |      |       |                                                                                                |        |
|--------------|-----|------|-----|------|-------|------------------------------------------------------------------------------------------------|--------|
| A_24_P284213 | 2.5 | 2.5  | 2.9 | 2.5  | CASC4 | Homo sapiens cancer susceptibility candidate 4 (CASC4), transcript variant 2, mRNA [NM_177974] | 113201 |
| A_23_P140469 | 1.0 | 1.0  | 1.0 | -2.4 | CASC4 | Homo sapiens cancer susceptibility candidate 4 (CASC4), transcript variant 1, mRNA [NM_138423] | 113201 |
| A_24_P940678 | 1.1 | -2.6 | 1.0 | 1.1  | CASC5 | cancer susceptibility candidate 5 [Source:HGNC Symbol;Acc:24054] [ENST00000526913]             | 57082  |
| A_24_P69379  | 1.5 | 7.8  | 3.2 | 3.4  | CASD1 | Homo sapiens CAS1 domain containing 1 (CASD1), mRNA [NM_022900]                                | 64921  |

|              |      |      |      |      |        |                                                                                                                                                    |       |
|--------------|------|------|------|------|--------|----------------------------------------------------------------------------------------------------------------------------------------------------|-------|
| A_23_P202978 | 1.1  | -4.0 | -1.0 | -1.0 | CASP1  | Homo sapiens caspase 1, apoptosis-related cysteine peptidase (interleukin 1, beta, convertase) (CASP1), transcript variant alpha, mRNA [NM_033292] | 834   |
| A_24_P139993 | -4.2 | -6.2 | -1.0 | 1.1  | CASP10 | Homo sapiens caspase 10, apoptosis-related cysteine peptidase (CASP10), transcript variant 1, mRNA [NM_032977]                                     | 843   |
| A_23_P90407  | 2.6  | 7.5  | 5.9  | 3.9  | CASP14 | Homo sapiens caspase 14, apoptosis-related cysteine peptidase (CASP14), mRNA [NM_012114]                                                           | 23581 |



|              |      |      |      |      |       |                                                                                                                  |     |
|--------------|------|------|------|------|-------|------------------------------------------------------------------------------------------------------------------|-----|
| A_23_P215701 | -1.0 | -1.0 | -5.7 | -1.0 | CASP2 | Homo sapiens caspase 2, apoptosis-related cysteine peptidase (CASP2), transcript variant 1, mRNA [NM_032982]     | 835 |
| A_23_P35906  | 1.5  | 1.8  | 1.3  | 3.6  | CASP4 | Homo sapiens caspase 4, apoptosis-related cysteine peptidase (CASP4), transcript variant gamma, mRNA [NM_033306] | 837 |
| A_23_P35912  | -2.3 | 2.2  | -1.8 | -2.0 | CASP4 | Homo sapiens caspase 4, apoptosis-related cysteine peptidase (CASP4), transcript variant gamma, mRNA [NM_033306] | 837 |

|              |      |      |      |      |       |                                                                                                                  |     |
|--------------|------|------|------|------|-------|------------------------------------------------------------------------------------------------------------------|-----|
| A_24_P157087 | -2.2 | 1.0  | 1.0  | -1.3 | CASP8 | Homo sapiens caspase 8, apoptosis-related cysteine peptidase (CASP8), transcript variant B, mRNA [NM_033355]     | 841 |
| A_24_P148499 | -5.8 | 1.0  | -1.0 | 1.1  | CASP8 | Homo sapiens caspase 8, apoptosis-related cysteine peptidase (CASP8), transcript variant E, mRNA [NM_033358]     | 841 |
| A_23_P97309  | -2.2 | -1.5 | -1.6 | -4.0 | CASP9 | Homo sapiens caspase 9, apoptosis-related cysteine peptidase (CASP9), transcript variant alpha, mRNA [NM_001229] | 842 |

|              |      |      |      |      |          |                                                                                      |           |
|--------------|------|------|------|------|----------|--------------------------------------------------------------------------------------|-----------|
| A_24_P935951 | -1.4 | -2.4 | -2.9 | -1.6 | CASZ1    | Homo sapiens castor zinc finger 1 (CASZ1), transcript variant 1, mRNA [NM_001079843] | 54897     |
| A_23_P201295 | 1.2  | 1.1  | -4.1 | 1.1  | CASZ1    | Homo sapiens castor zinc finger 1 (CASZ1), transcript variant 2, mRNA [NM_017766]    | 54897     |
| A_24_P229084 | 6.1  | 5.9  | 2.0  | 5.4  | CATSPERG | Homo sapiens cation channel, sperm-associated, gamma (CATSPERG), mRNA [NM_021185]    | 57828     |
| A_24_P238412 | 1.8  | 1.8  | 1.8  | -5.4 | CATX-1   | Homo sapiens CATX-1 mRNA, partial cds. [AF083117]                                    | 100506513 |
| A_23_P123071 | 6.6  | 3.4  | 5.9  | 1.9  | CAV2     | Homo sapiens caveolin 2 (CAV2), transcript variant 1, mRNA [NM_001233]               | 858       |

|              |      |      |      |      |      |                                                                                                   |     |
|--------------|------|------|------|------|------|---------------------------------------------------------------------------------------------------|-----|
| A_24_P925040 | -6.6 | -3.0 | -1.0 | -1.0 | CAV2 | Homo sapiens caveolin 2 (CAV2), transcript variant 1, mRNA [NM_001233]                            | 858 |
| A_24_P251599 | -1.2 | 1.4  | 1.3  | 2.5  | CAV3 | Homo sapiens caveolin 3 (CAV3), transcript variant 2, mRNA [NM_001234]                            | 859 |
| A_24_P107918 | -1.9 | -2.2 | -1.7 | 1.7  | CBFB | Homo sapiens core-binding factor, beta subunit (CBFB), transcript variant 1, mRNA [NM_022845]     | 865 |
| A_23_P339191 | 1.3  | 2.7  | 1.7  | 2.0  | CBL  | Homo sapiens Cas-Br-M (murine) ecotropic retroviral transforming sequence (CBL), mRNA [NM_005188] | 867 |

|              |       |      |      |      |       |                                                                                                      |        |
|--------------|-------|------|------|------|-------|------------------------------------------------------------------------------------------------------|--------|
| A_23_P29830  | -28.7 | -1.2 | -2.4 | -1.9 | CBLB  | Homo sapiens Cas-Br-M (murine) ecotropic retroviral transforming sequence b (CBLB), mRNA [NM_170662] | 868    |
| A_23_P3159   | 2.0   | -1.6 | -1.6 | -1.9 | CBLN3 | Homo sapiens cerebellin 3 precursor (CBLN3), mRNA [NM_001039771]                                     | 643866 |
| A_23_P313428 | -26.2 | -4.3 | -1.1 | -1.1 | CBLN4 | Homo sapiens cerebellin 4 precursor (CBLN4), mRNA [NM_080617]                                        | 140689 |
| A_23_P29046  | -1.6  | -1.0 | -3.0 | -1.0 | CBR1  | Homo sapiens carbonyl reductase 1 (CBR1), mRNA [NM_001757]                                           | 873    |

|              |      |      |      |      |       |                                                                                        |        |
|--------------|------|------|------|------|-------|----------------------------------------------------------------------------------------|--------|
| A_24_P48856  | 2.1  | 1.1  | 3.7  | 2.7  | CBS   | Homo sapiens cystathionine-beta-synthase (CBS), transcript variant 1, mRNA [NM_000071] | 875    |
| A_23_P166306 | -2.2 | -1.0 | 1.2  | -1.0 | CBS   | Homo sapiens cystathionine-beta-synthase (CBS), transcript variant 1, mRNA [NM_000071] | 875    |
| A_32_P161432 | 2.2  | 1.1  | 2.2  | -1.3 | CBWD2 | Homo sapiens COBW domain containing 2 (CBWD2), mRNA [NM_172003]                        | 150472 |
| A_24_P170593 | 1.1  | 1.1  | -3.2 | 1.0  | CBWD6 | Homo sapiens clone 1659351 unknown mRNA. [AF293368]                                    | 644019 |

|              |      |      |      |      |      |                                                                                    |       |
|--------------|------|------|------|------|------|------------------------------------------------------------------------------------|-------|
| A_23_P107507 | 1.7  | -1.3 | -1.2 | 2.6  | CBX1 | Homo sapiens chromobox homolog 1 (CBX1), transcript variant 1, mRNA [NM_006807]    | 10951 |
| A_23_P353567 | -1.3 | -1.4 | -1.3 | -2.8 | CBX2 | Homo sapiens chromobox homolog 2 (CBX2), transcript variant 2, mRNA [NM_032647]    | 84733 |
| A_23_P89621  | 1.9  | 2.1  | 4.0  | 1.0  | CBX4 | Homo sapiens chromobox homolog 4 (CBX4), mRNA [NM_003655]                          | 8535  |
| A_24_P664995 | 1.4  | -1.8 | 1.1  | 2.7  | CBX5 | Homo sapiens chromobox homolog 5 (CBX5), transcript variant 1, mRNA [NM_001127322] | 23468 |
| A_24_P254437 | 5.7  | 6.7  | 4.6  | 6.2  | CBX6 | chromobox homolog 6 [Source:HGNC Symbol;Acc:1556] [ENST00000407418]                | 23466 |

|              |     |     |      |      |        |                                                                                 |        |
|--------------|-----|-----|------|------|--------|---------------------------------------------------------------------------------|--------|
| A_23_P250735 | 2.3 | 2.1 | 1.0  | 1.5  | CBX7   | Homo sapiens chromobox homolog 7 (CBX7), mRNA [NM_175709]                       | 23492  |
| A_23_P55873  | 7.0 | 2.4 | 1.5  | 2.0  | CC2D1A | Homo sapiens coiled-coil and C2 domain containing 1A (CC2D1A), mRNA [NM_017721] | 54862  |
| A_24_P41371  | 1.7 | 1.8 | 2.7  | -1.0 | CC2D1A | Homo sapiens coiled-coil and C2 domain containing 1A (CC2D1A), mRNA [NM_017721] | 54862  |
| A_24_P76740  | 2.0 | 2.1 | -1.4 | -1.0 | CC2D1B | Homo sapiens coiled-coil and C2 domain containing 1B (CC2D1B), mRNA [NM_032449] | 200014 |



|              |      |      |      |      |          |                                                                                                 |        |
|--------------|------|------|------|------|----------|-------------------------------------------------------------------------------------------------|--------|
| A_23_P55544  | -2.3 | -2.4 | -3.0 | -6.4 | CCBE1    | Homo sapiens collagen and calcium binding EGF domains 1 (CCBE1), mRNA [NM_133459]               | 147372 |
| A_23_P46017  | 1.5  | 2.0  | 1.6  | 2.7  | CCBL2    | Homo sapiens cysteine conjugate-beta lyase 2 (CCBL2), transcript variant 1, mRNA [NM_001008661] | 56267  |
| A_23_P388914 | 1.6  | 1.1  | -2.6 | 1.0  | CCDC101  | Homo sapiens coiled-coil domain containing 101 (CCDC101), mRNA [NM_138414]                      | 112869 |
| A_23_P65983  | 54.0 | 52.7 | 58.1 | 53.9 | CCDC102A | Homo sapiens coiled-coil domain containing 102A (CCDC102A), mRNA [NM_033212]                    | 92922  |

|              |      |       |      |      |          |                                                                                                  |        |
|--------------|------|-------|------|------|----------|--------------------------------------------------------------------------------------------------|--------|
| A_32_P176701 | -2.1 | 1.7   | -2.0 | 1.4  | CCDC108  | Homo sapiens coiled-coil domain containing 108 (CCDC108), transcript variant 1, mRNA [NM_194302] | 255101 |
| A_23_P255376 | -4.9 | -1.1  | -1.8 | -1.1 | CCDC109B | Homo sapiens coiled-coil domain containing 109B (CCDC109B), mRNA [NM_017918]                     | 55013  |
| A_23_P384532 | 1.0  | -1.3  | -4.7 | -1.0 | CCDC11   | Homo sapiens coiled-coil domain containing 11 (CCDC11), mRNA [NM_145020]                         | 220136 |
| A_24_P73730  | 1.0  | -14.9 | -1.1 | 1.0  | CCDC113  | Homo sapiens coiled-coil domain containing 113 (CCDC113), transcript variant 1, mRNA [NM_014157] | 29070  |

|              |     |     |      |      |         |                                                                                                  |        |
|--------------|-----|-----|------|------|---------|--------------------------------------------------------------------------------------------------|--------|
| A_24_P264154 | 1.3 | 2.1 | -1.5 | 1.7  | CCDC113 | Homo sapiens coiled-coil domain containing 113 (CCDC113), transcript variant 1, mRNA [NM_014157] | 29070  |
| A_32_P24125  | 2.5 | 3.2 | 13.8 | 2.2  | CCDC114 | Homo sapiens coiled-coil domain containing 114 (CCDC114), transcript variant 2, mRNA [NM_144577] | 93233  |
| A_24_P54485  | 5.2 | 2.2 | 5.2  | 3.5  | CCDC115 | Homo sapiens coiled-coil domain containing 115 (CCDC115), mRNA [NM_032357]                       | 84317  |
| A_23_P372334 | 1.1 | 1.1 | -2.4 | -2.9 | CCDC12  | Homo sapiens coiled-coil domain containing 12 (CCDC12), mRNA [NM_144716]                         | 151903 |

|              |      |      |      |      |         |                                                                                                  |        |
|--------------|------|------|------|------|---------|--------------------------------------------------------------------------------------------------|--------|
| A_24_P48983  | 4.5  | 2.7  | 4.8  | 1.5  | CCDC120 | Homo sapiens coiled-coil domain containing 120 (CCDC120), transcript variant 3, mRNA [NM_033626] | 90060  |
| A_24_P319684 | 1.3  | -3.4 | 1.6  | -2.9 | CCDC121 | Homo sapiens coiled-coil domain containing 121 (CCDC121), transcript variant 3, mRNA [NM_024584] | 79635  |
| A_23_P302078 | 1.2  | 1.6  | -4.5 | -1.6 | CCDC122 | coiled-coil domain containing 122 [Source:HGNC Symbol;Acc:26478] [ENST00000476570]               | 160857 |
| A_32_P213661 | -1.0 | -2.3 | -1.1 | 1.3  | CCDC122 | Homo sapiens coiled-coil domain containing 122 (CCDC122), mRNA [NM_144974]                       | 160857 |

|              |      |      |      |     |         |                                                                                                  |        |
|--------------|------|------|------|-----|---------|--------------------------------------------------------------------------------------------------|--------|
| A_23_P342118 | 1.4  | 1.9  | -2.1 | 1.3 | CCDC124 | Homo sapiens coiled-coil domain containing 124 (CCDC124), transcript variant 1, mRNA [NM_138442] | 115098 |
| A_23_P432591 | -5.5 | -1.0 | -1.0 | 1.0 | CCDC125 | Homo sapiens coiled-coil domain containing 125 (CCDC125), mRNA [NM_176816]                       | 202243 |
| A_23_P101461 | 2.2  | 2.1  | 2.1  | 2.2 | CCDC130 | Homo sapiens coiled-coil domain containing 130 (CCDC130), mRNA [NM_030818]                       | 81576  |
| A_24_P409219 | 1.1  | -6.0 | 1.0  | 1.3 | CCDC132 | Homo sapiens coiled-coil domain containing 132 (CCDC132), transcript variant 1, mRNA [NM_017667] | 55610  |

|              |      |       |      |      |          |                                                                                                  |        |
|--------------|------|-------|------|------|----------|--------------------------------------------------------------------------------------------------|--------|
| A_23_P215614 | 1.0  | -1.0  | -1.1 | -2.1 | CCDC132  | Homo sapiens coiled-coil domain containing 132 (CCDC132), transcript variant 1, mRNA [NM_017667] | 55610  |
| A_23_P129367 | 1.0  | -1.0  | -1.1 | 2.2  | CCDC135  | Homo sapiens coiled-coil domain containing 135 (CCDC135), mRNA [NM_032269]                       | 84229  |
| A_23_P429478 | -8.3 | 1.1   | 1.0  | 1.1  | CCDC140  | Homo sapiens coiled-coil domain containing 140 (CCDC140), mRNA [NM_153038]                       | 151278 |
| A_32_P216369 | 1.0  | -10.8 | 1.1  | 1.0  | CCDC144A | Homo sapiens coiled-coil domain containing 144A (CCDC144A), mRNA [NM_014695]                     | 9720   |

|              |      |      |      |      |         |                                                                                                  |       |
|--------------|------|------|------|------|---------|--------------------------------------------------------------------------------------------------|-------|
| A_23_P168771 | -1.1 | 1.0  | -2.5 | -2.5 | CCDC146 | Homo sapiens coiled-coil domain containing 146 (CCDC146), mRNA [NM_020879]                       | 57639 |
| A_23_P419764 | 2.6  | -1.5 | 3.0  | 1.7  | CCDC149 | coiled-coil domain containing 149 [Source:HGNC Symbol;Acc:25405] [ENST00000503881]               | 91050 |
| A_32_P108738 | -3.4 | 1.0  | 1.0  | 1.1  | CCDC149 | Homo sapiens coiled-coil domain containing 149 (CCDC149), transcript variant 1, mRNA [NM_173463] | 91050 |
| A_23_P44942  | 1.0  | 1.0  | -2.2 | -1.7 | CCDC15  | Homo sapiens coiled-coil domain containing 15 (CCDC15), mRNA [NM_025004]                         | 80071 |

|              |      |      |      |      |         |                                                                               |        |
|--------------|------|------|------|------|---------|-------------------------------------------------------------------------------|--------|
| A_23_P39574  | -1.0 | -2.0 | -1.0 | -1.0 | CCDC150 | Homo sapiens coiled-coil domain containing 150 (CCDC150), mRNA [NM_001080539] | 284992 |
| A_23_P326893 | -2.4 | -2.5 | -1.7 | -2.0 | CCDC151 | Homo sapiens coiled-coil domain containing 151 (CCDC151), mRNA [NM_145045]    | 115948 |
| A_24_P75920  | 2.1  | 4.3  | 4.0  | 1.1  | CCDC159 | Homo sapiens coiled-coil domain containing 159 (CCDC159), mRNA [NM_001080503] | 126075 |
| A_23_P360605 | 1.7  | 1.0  | -7.5 | -1.1 | CCDC165 | Homo sapiens coiled-coil domain containing 165 (CCDC165), mRNA [NM_015210]    | 23255  |



|              |      |      |      |      |         |                                                                                                     |        |
|--------------|------|------|------|------|---------|-----------------------------------------------------------------------------------------------------|--------|
| A_23_P14216  | 1.6  | 4.2  | 1.6  | 1.1  | CCDC169 | Homo sapiens coiled-coil domain containing 169 (CCDC169), transcript variant 7, mRNA [NM_001198908] | 728591 |
| A_24_P310864 | -1.4 | -1.6 | -2.7 | -1.1 | CCDC24  | Homo sapiens coiled-coil domain containing 24 (CCDC24), mRNA [NM_152499]                            | 149473 |
| A_24_P379353 | 1.5  | 1.4  | 2.2  | 1.0  | CCDC24  | Homo sapiens coiled-coil domain containing 24 (CCDC24), mRNA [NM_152499]                            | 149473 |
| A_24_P158142 | -3.2 | 1.6  | -6.6 | -1.7 | CCDC25  | Homo sapiens coiled-coil domain containing 25 (CCDC25), mRNA [NM_018246]                            | 55246  |

|              |      |      |      |      |         |                                                                                                |        |
|--------------|------|------|------|------|---------|------------------------------------------------------------------------------------------------|--------|
| A_23_P71300  | -1.4 | -5.8 | -1.1 | -1.1 | CCDC25  | Homo sapiens coiled-coil domain containing 25 (CCDC25), mRNA [NM_018246]                       | 55246  |
| A_23_P62764  | -1.5 | -3.7 | -2.6 | -2.6 | CCDC28B | Homo sapiens coiled-coil domain containing 28B (CCDC28B), mRNA [NM_024296]                     | 79140  |
| A_24_P349196 | 1.0  | 1.3  | -1.7 | -2.1 | CCDC30  | Homo sapiens coiled-coil domain containing 30 (CCDC30), mRNA [NM_001080850]                    | 728621 |
| A_24_P195831 | 3.4  | 2.2  | 2.8  | 1.6  | CCDC34  | Homo sapiens coiled-coil domain containing 34 (CCDC34), transcript variant 1, mRNA [NM_030771] | 91057  |

|              |      |      |      |      |        |                                                                                                |        |
|--------------|------|------|------|------|--------|------------------------------------------------------------------------------------------------|--------|
| A_24_P134765 | 2.7  | 2.7  | 2.6  | 2.6  | CCDC36 | Homo sapiens coiled-coil domain containing 36 (CCDC36), transcript variant 1, mRNA [NM_178173] | 339834 |
| A_32_P54037  | 1.3  | 1.2  | 2.3  | -1.3 | CCDC38 | Homo sapiens coiled-coil domain containing 38 (CCDC38), mRNA [NM_182496]                       | 120935 |
| A_32_P404549 | 1.0  | -1.0 | -1.0 | -2.7 | CCDC39 | Homo sapiens coiled-coil domain containing 39 (CCDC39), mRNA [NM_181426]                       | 339829 |
| A_23_P162378 | -2.0 | 1.7  | 1.5  | -1.7 | CCDC41 | Homo sapiens coiled-coil domain containing 41 (CCDC41), transcript variant 1, mRNA [NM_016122] | 51134  |

|              |      |       |      |      |        |                                                                                                |        |
|--------------|------|-------|------|------|--------|------------------------------------------------------------------------------------------------|--------|
| A_23_P49616  | -1.3 | -11.1 | 2.0  | 1.1  | CCDC47 | Homo sapiens coiled-coil domain containing 47 (CCDC47), mRNA [NM_020198]                       | 57003  |
| A_24_P176733 | 3.8  | 3.7   | 3.7  | 3.6  | CCDC47 | Homo sapiens coiled-coil domain containing 47 (CCDC47), mRNA [NM_020198]                       | 57003  |
| A_24_P51777  | -4.4 | 1.1   | -1.1 | 1.2  | CCDC50 | Homo sapiens coiled-coil domain containing 50 (CCDC50), transcript variant 2, mRNA [NM_178335] | 152137 |
| A_24_P910733 | 1.3  | 2.9   | 2.3  | -3.3 | CCDC50 | Homo sapiens coiled-coil domain containing 50 (CCDC50), transcript variant 2, mRNA [NM_178335] | 152137 |

|              |       |      |      |      |        |                                                                                                |        |
|--------------|-------|------|------|------|--------|------------------------------------------------------------------------------------------------|--------|
| A_23_P384024 | 1.0   | -1.0 | -1.1 | -4.9 | CCDC50 | Homo sapiens coiled-coil domain containing 50 (CCDC50), transcript variant 2, mRNA [NM_178335] | 152137 |
| A_23_P69362  | 2.4   | 1.0  | 1.9  | -1.0 | CCDC51 | Homo sapiens coiled-coil domain containing 51 (CCDC51), mRNA [NM_024661]                       | 79714  |
| A_23_P356965 | -14.9 | 1.1  | -1.0 | -1.0 | CCDC57 | Homo sapiens cDNA FLJ43953 fis, clone TESTI4015477. [AK125941]                                 | 284001 |
| A_23_P337327 | 1.1   | -1.4 | -2.9 | -2.0 | CCDC57 | Homo sapiens mRNA; cDNA DKFZp434C2019 (from clone DKFZp434C2019); partial cds. [AL137530]      | 284001 |

|              |     |      |     |      |        |                                                                                         |        |
|--------------|-----|------|-----|------|--------|-----------------------------------------------------------------------------------------|--------|
| A_23_P365119 | 2.0 | 2.5  | 1.7 | -1.1 | CCDC57 | coiled-coil domain containing 57 [Source:HGNC Symbol;Accession:27564] [ENST00000324808] | 284001 |
| A_24_P896381 | 2.5 | 1.1  | 1.6 | 1.3  | CCDC57 | Homo sapiens coiled-coil domain containing 57 (CCDC57), mRNA [NM_198082]                | 284001 |
| A_32_P215113 | 2.1 | -1.0 | 2.0 | -1.2 | CCDC58 | Homo sapiens coiled-coil domain containing 58 (CCDC58), mRNA [NM_001017928]             | 131076 |
| A_23_P400147 | 4.6 | -1.7 | 1.8 | 3.3  | CCDC61 | Homo sapiens coiled-coil domain containing 61 (CCDC61), mRNA [NM_001080402]             | 729440 |

|              |      |      |      |      |         |                                                                            |        |
|--------------|------|------|------|------|---------|----------------------------------------------------------------------------|--------|
| A_24_P273647 | 4.6  | 5.7  | 5.3  | 2.7  | CCDC64B | Homo sapiens mRNA; cDNA DKFZp666L166 (from clone DKFZp666L166). [AL833749] | 146439 |
| A_32_P153954 | 1.6  | 1.6  | 3.2  | 1.0  | CCDC67  | Homo sapiens coiled-coil domain containing 67 (CCDC67), mRNA [NM_181645]   | 159989 |
| A_23_P213810 | -1.1 | -1.1 | -1.2 | -3.0 | CCDC69  | Homo sapiens coiled-coil domain containing 69 (CCDC69), mRNA [NM_015621]   | 26112  |
| A_24_P97825  | 3.8  | 3.5  | 3.4  | -1.9 | CCDC69  | Homo sapiens coiled-coil domain containing 69 (CCDC69), mRNA [NM_015621]   | 26112  |

|              |       |      |      |      |        |                                                                                              |        |
|--------------|-------|------|------|------|--------|----------------------------------------------------------------------------------------------|--------|
| A_23_P374294 | 1.3   | 1.5  | 1.9  | -3.0 | CCDC7  | Homo sapiens coiled-coil domain containing 7 (CCDC7), transcript variant 1, mRNA [NM_145023] | 221016 |
| A_23_P2857   | -3.7  | -1.0 | 1.0  | 1.0  | CCDC70 | Homo sapiens coiled-coil domain containing 70 (CCDC70), mRNA [NM_031290]                     | 83446  |
| A_23_P61524  | -35.6 | 1.0  | -1.1 | -1.3 | CCDC71 | Homo sapiens coiled-coil domain containing 71 (CCDC71), mRNA [NM_022903]                     | 64925  |
| A_24_P358425 | 3.7   | 2.0  | 1.9  | 1.4  | CCDC75 | Homo sapiens coiled-coil domain containing 75 (CCDC75), mRNA [NM_174931]                     | 253635 |



|              |      |      |      |      |        |                                                                                                |        |
|--------------|------|------|------|------|--------|------------------------------------------------------------------------------------------------|--------|
| A_24_P396557 | -2.2 | -2.4 | -1.0 | -2.0 | CCDC76 | Homo sapiens coiled-coil domain containing 76 (CCDC76), mRNA [NM_019083]                       | 54482  |
| A_23_P354864 | -2.1 | -2.2 | -2.5 | -1.3 | CCDC78 | Homo sapiens coiled-coil domain containing 78 (CCDC78), mRNA [NM_001031737]                    | 124093 |
| A_23_P164958 | 1.1  | 2.2  | 1.1  | -1.1 | CCDC8  | Homo sapiens coiled-coil domain containing 8 (CCDC8), mRNA [NM_032040]                         | 83987  |
| A_23_P58082  | -3.2 | 1.1  | 1.0  | 1.0  | CCDC80 | Homo sapiens coiled-coil domain containing 80 (CCDC80), transcript variant 1, mRNA [NM_199511] | 151887 |

|              |     |      |      |      |        |                                                                                                |        |
|--------------|-----|------|------|------|--------|------------------------------------------------------------------------------------------------|--------|
| A_23_P128008 | 1.1 | 1.1  | 1.1  | -2.6 | CCDC81 | Homo sapiens coiled-coil domain containing 81 (CCDC81), transcript variant 2, mRNA [NM_021827] | 60494  |
| A_24_P372580 | 1.1 | -3.4 | 1.1  | 1.1  | CCDC82 | Homo sapiens coiled-coil domain containing 82 (CCDC82), mRNA [NM_024725]                       | 79780  |
| A_23_P217972 | 4.8 | 5.6  | 3.6  | 8.3  | CCDC82 | Homo sapiens HSPC048 mRNA, complete cds. [AF161533]                                            | 79780  |
| A_24_P636332 | 2.0 | 1.2  | -1.0 | 1.0  | CCDC84 | Homo sapiens coiled-coil domain containing 84 (CCDC84), mRNA [NM_198489]                       | 338657 |

|              |      |      |      |      |         |                                                                                                  |        |
|--------------|------|------|------|------|---------|--------------------------------------------------------------------------------------------------|--------|
| A_23_P37391  | -1.0 | -1.0 | -2.6 | -1.0 | CCDC85C | Homo sapiens coiled-coil domain containing 85C (CCDC85C), mRNA [NM_001144995]                    | 317762 |
| A_24_P263259 | -1.0 | -1.0 | 1.9  | -2.2 | CCDC85C | Homo sapiens coiled-coil domain containing 85C (CCDC85C), mRNA [NM_001144995]                    | 317762 |
| A_24_P38944  | 2.2  | 3.1  | 1.5  | 7.1  | CCDC86  | Homo sapiens coiled-coil domain containing 86 (CCDC86), mRNA [NM_024098]                         | 79080  |
| A_23_P17269  | -1.6 | 1.1  | -2.1 | 1.1  | CCDC88A | Homo sapiens coiled-coil domain containing 88A (CCDC88A), transcript variant 2, mRNA [NM_018084] | 55704  |

|             |      |      |      |      |         |                                                                                                  |        |
|-------------|------|------|------|------|---------|--------------------------------------------------------------------------------------------------|--------|
| A_23_P28664 | -1.4 | 1.4  | -2.7 | 1.4  | CCDC88A | Homo sapiens coiled-coil domain containing 88A (CCDC88A), transcript variant 2, mRNA [NM_018084] | 55704  |
| A_24_P20120 | 2.3  | 2.2  | -1.1 | -1.1 | CCDC88A | Homo sapiens coiled-coil domain containing 88A (CCDC88A), transcript variant 2, mRNA [NM_018084] | 55704  |
| A_23_P24389 | 3.6  | 7.9  | 1.5  | 2.4  | CCDC88B | Homo sapiens coiled-coil domain containing 88B (CCDC88B), mRNA [NM_032251]                       | 283234 |
| A_23_P24384 | -1.0 | -1.1 | -3.0 | -1.1 | CCDC88B | Homo sapiens coiled-coil domain containing 88B (CCDC88B), mRNA [NM_032251]                       | 283234 |

|              |      |       |      |      |         |                                                                               |        |
|--------------|------|-------|------|------|---------|-------------------------------------------------------------------------------|--------|
| A_24_P289170 | -2.1 | -1.2  | -1.6 | -1.4 | CCDC88C | Homo sapiens coiled-coil domain containing 88C (CCDC88C), mRNA [NM_001080414] | 440193 |
| A_32_P170811 | -1.4 | -2.2  | -1.3 | -1.4 | CCDC88C | Homo sapiens coiled-coil domain containing 88C (CCDC88C), mRNA [NM_001080414] | 440193 |
| A_24_P136094 | 1.9  | 2.1   | -1.2 | 4.8  | CCDC88C | Homo sapiens coiled-coil domain containing 88C (CCDC88C), mRNA [NM_001080414] | 440193 |
| A_23_P379945 | 1.0  | -14.5 | -1.1 | -1.1 | CCDC88C | Homo sapiens coiled-coil domain containing 88C (CCDC88C), mRNA [NM_001080414] | 440193 |

|              |      |      |      |      |         |                                                                            |        |
|--------------|------|------|------|------|---------|----------------------------------------------------------------------------|--------|
| A_24_P192988 | 5.8  | 6.5  | 11.2 | 6.5  | CCDC89  | Homo sapiens coiled-coil domain containing 89 (CCDC89), mRNA [NM_152723]   | 220388 |
| A_23_P417965 | -1.6 | 2.4  | -1.3 | -1.3 | CCDC9   | Homo sapiens coiled-coil domain containing 9 (CCDC9), mRNA [NM_015603]     | 26093  |
| A_24_P133085 | -1.2 | -2.2 | -2.2 | 1.1  | CCDC90B | Homo sapiens coiled-coil domain containing 90B (CCDC90B), mRNA [NM_021825] | 60492  |
| A_32_P184003 | 1.1  | -4.8 | -1.0 | 1.0  | CCDC91  | Homo sapiens coiled-coil domain containing 91 (CCDC91), mRNA [NM_018318]   | 55297  |

|              |      |      |      |      |        |                                                                          |       |
|--------------|------|------|------|------|--------|--------------------------------------------------------------------------|-------|
| A_24_P372959 | -1.4 | -3.5 | 1.0  | 1.0  | CCDC91 | Homo sapiens coiled-coil domain containing 91 (CCDC91), mRNA [NM_018318] | 55297 |
| A_23_P91062  | -1.1 | -2.8 | -3.2 | -2.4 | CCDC93 | Homo sapiens coiled-coil domain containing 93 (CCDC93), mRNA [NM_019044] | 54520 |
| A_23_P398044 | -2.1 | 1.1  | 1.1  | 1.2  | CCDC97 | Homo sapiens coiled-coil domain containing 97 (CCDC97), mRNA [NM_052848] | 90324 |
| A_23_P60227  | 2.1  | 1.6  | 2.0  | 1.4  | CCIN   | Homo sapiens calicin (CCIN), mRNA [NM_005893]                            | 881   |
| A_23_P66635  | -8.8 | 1.0  | 1.0  | -1.3 | CCL11  | Homo sapiens chemokine (C-C motif) ligand 11 (CCL11), mRNA [NM_002986]   | 6356  |

|              |     |     |      |      |       |                                                                                              |      |
|--------------|-----|-----|------|------|-------|----------------------------------------------------------------------------------------------|------|
| A_23_P26325  | 1.7 | 1.3 | -3.5 | -1.1 | CCL17 | Homo sapiens chemokine (C-C motif) ligand 17 (CCL17), mRNA [NM_002987]                       | 6361 |
| A_23_P123853 | 3.2 | 2.7 | 1.0  | 3.2  | CCL19 | Homo sapiens chemokine (C-C motif) ligand 19 (CCL19), mRNA [NM_006274]                       | 6363 |
| A_23_P17065  | 5.5 | 1.5 | 10.9 | 11.0 | CCL20 | Homo sapiens chemokine (C-C motif) ligand 20 (CCL20), transcript variant 1, mRNA [NM_004591] | 6364 |
| A_23_P112470 | 4.7 | 7.2 | 1.2  | 1.4  | CCL21 | Homo sapiens chemokine (C-C motif) ligand 21 (CCL21), mRNA [NM_002989]                       | 6366 |



|              |      |      |      |      |       |                                                                                                      |       |
|--------------|------|------|------|------|-------|------------------------------------------------------------------------------------------------------|-------|
| A_24_P319088 | 1.6  | -2.1 | 1.0  | -1.4 | CCL23 | Homo sapiens chemokine (C-C motif) ligand 23 (CCL23), transcript variant CKbeta8-1, mRNA [NM_005064] | 6368  |
| A_23_P55828  | 1.5  | -2.3 | -1.1 | -1.0 | CCL25 | Homo sapiens chemokine (C-C motif) ligand 25 (CCL25), transcript variant 1, mRNA [NM_005624]         | 6370  |
| A_23_P503072 | -2.3 | -3.0 | -2.9 | -2.9 | CCL28 | Homo sapiens chemokine (C-C motif) ligand 28 (CCL28), mRNA [NM_148672]                               | 56477 |
| A_23_P373017 | 1.0  | -1.0 | -6.3 | -1.1 | CCL3  | Homo sapiens mRNA for pLD78 peptide, complete cds. [D00044]                                          | 6348  |

|              |      |      |      |      |       |                                                                                            |       |
|--------------|------|------|------|------|-------|--------------------------------------------------------------------------------------------|-------|
| A_23_P207564 | 4.3  | -1.3 | 3.9  | -1.2 | CCL4  | Homo sapiens chemokine (C-C motif) ligand 4 (CCL4), transcript variant 1, mRNA [NM_002984] | 6351  |
| A_23_P78037  | 2.0  | 2.5  | 2.4  | 2.4  | CCL7  | Homo sapiens chemokine (C-C motif) ligand 7 (CCL7), mRNA [NM_006273]                       | 6354  |
| A_23_P65757  | 1.7  | -3.4 | 2.4  | 1.6  | CCNB2 | Homo sapiens cyclin B2 (CCNB2), mRNA [NM_004701]                                           | 9133  |
| A_32_P72822  | -1.6 | -1.9 | -2.1 | -1.8 | CCNB2 | Homo sapiens cDNA FLJ13342 fis, clone OVARC1001950. [AK023404]                             | 9133  |
| A_23_P171107 | 2.3  | 2.2  | 2.2  | 2.2  | CCNB3 | Homo sapiens cyclin B3 (CCNB3), transcript variant 3, mRNA [NM_033031]                     | 85417 |

|              |      |      |      |      |       |                                                                        |      |
|--------------|------|------|------|------|-------|------------------------------------------------------------------------|------|
| A_24_P278747 | -2.5 | 1.0  | 1.0  | 1.1  | CCND2 | Homo sapiens cyclin D2 (CCND2), mRNA [NM_001759]                       | 894  |
| A_23_P139881 | 2.3  | -1.3 | 2.3  | 2.2  | CCND2 | Homo sapiens cyclin D2 (CCND2), mRNA [NM_001759]                       | 894  |
| A_23_P361773 | -1.1 | 2.4  | -1.8 | 2.5  | CCND3 | Homo sapiens cyclin D3 (CCND3), transcript variant 2, mRNA [NM_001760] | 896  |
| A_23_P214464 | 2.1  | 6.1  | 2.9  | 1.4  | CCND3 | Homo sapiens cyclin D3 (CCND3), transcript variant 2, mRNA [NM_001760] | 896  |
| A_23_P209200 | -4.3 | -1.4 | -1.0 | -4.4 | CCNE1 | Homo sapiens cyclin E1 (CCNE1), mRNA [NM_001238]                       | 898  |
| A_23_P215976 | 1.1  | 1.1  | 1.0  | 2.1  | CCNE2 | Homo sapiens cyclin E2 (CCNE2), mRNA [NM_057749]                       | 9134 |

|              |      |      |      |      |       |                                                                        |       |
|--------------|------|------|------|------|-------|------------------------------------------------------------------------|-------|
| A_23_P58606  | 2.1  | -2.3 | 1.2  | 1.1  | CCNG1 | Homo sapiens cyclin G1 (CCNG1), transcript variant 1, mRNA [NM_004060] | 900   |
| A_24_P80532  | 1.0  | -4.9 | 1.4  | 2.3  | CCNG2 | Homo sapiens cyclin G2 (CCNG2), mRNA [NM_004354]                       | 901   |
| A_24_P12065  | 2.7  | 2.6  | 2.5  | 2.4  | CCNG2 | Homo sapiens cyclin G2 (CCNG2), mRNA [NM_004354]                       | 901   |
| A_24_P140621 | 1.0  | -1.4 | 1.4  | -2.3 | CCNJL | Homo sapiens cyclin J-like (CCNJL), mRNA [NM_024565]                   | 79616 |
| A_24_P348925 | 1.0  | -1.0 | -1.0 | -4.6 | CCNK  | Homo sapiens cyclin K (CCNK), mRNA [NM_001099402]                      | 8812  |
| A_23_P92860  | -1.4 | -1.5 | -1.6 | -4.7 | CCNO  | Homo sapiens cyclin O (CCNO), mRNA [NM_021147]                         | 10309 |

|              |      |       |      |       |        |                                                                                                     |        |
|--------------|------|-------|------|-------|--------|-----------------------------------------------------------------------------------------------------|--------|
| A_24_P246397 | 1.9  | 1.4   | 2.7  | -1.2  | CCNO   | Homo sapiens cyclin O (CCNO), mRNA [NM_021147]                                                      | 10309  |
| A_23_P87575  | 1.2  | 2.9   | 4.0  | -1.1  | CCNT1  | Homo sapiens cyclin T1 (CCNT1), mRNA [NM_001240]                                                    | 904    |
| A_24_P174341 | -2.0 | -2.1  | -2.1 | -1.8  | CCNT2  | Homo sapiens cyclin T2 (CCNT2), transcript variant b, mRNA [NM_058241]                              | 905    |
| A_24_P659113 | 1.1  | 1.0   | 1.0  | -12.2 | CCNYL1 | Homo sapiens cyclin Y-like 1 (CCNYL1), transcript variant 2, mRNA [NM_152523]                       | 151195 |
| A_23_P26501  | 1.1  | -18.7 | -1.1 | -1.0  | CCP110 | Homo sapiens centriolar coiled coil protein 110kDa (CCP110), transcript variant 2, mRNA [NM_014711] | 9738   |

|              |      |       |      |      |       |                                                                                                 |      |
|--------------|------|-------|------|------|-------|-------------------------------------------------------------------------------------------------|------|
| A_23_P48897  | 1.0  | -1.2  | -1.1 | -2.6 | CCPG1 | Homo sapiens cell cycle progression restoration 8 protein (CPR8) mRNA, complete cds. [AF011794] | 9236 |
| A_23_P6849   | -1.0 | -41.0 | -1.1 | -1.1 | CCR1  | Homo sapiens chemokine (C-C motif) receptor 1 (CCR1), mRNA [NM_001295]                          | 1230 |
| A_23_P141367 | 1.1  | -1.9  | -4.3 | -1.4 | CCR10 | Homo sapiens chemokine (C-C motif) receptor 10 (CCR10), mRNA [NM_016602]                        | 2826 |
| A_23_P250302 | -1.3 | -3.2  | -2.3 | -1.5 | CCR3  | Homo sapiens chemokine (C-C motif) receptor 3 (CCR3), transcript variant 1, mRNA [NM_001837]    | 1232 |

|              |      |      |      |      |       |                                                                                                    |      |
|--------------|------|------|------|------|-------|----------------------------------------------------------------------------------------------------|------|
| A_23_P72989  | -2.8 | 1.0  | 1.0  | -1.0 | CCR4  | Homo sapiens chemokine (C-C motif) receptor 4 (CCR4), mRNA [NM_005508]                             | 1233 |
| A_23_P343398 | -1.0 | 4.0  | 1.3  | 1.0  | CCR7  | Homo sapiens chemokine (C-C motif) receptor 7 (CCR7), mRNA [NM_001838]                             | 1236 |
| A_23_P69012  | -5.5 | -1.0 | -1.0 | 1.0  | CCR8  | Homo sapiens chemokine (C-C motif) receptor 8 (CCR8), mRNA [NM_005201]                             | 1237 |
| A_23_P69310  | -1.2 | -1.3 | -1.3 | -2.1 | CCRL2 | Homo sapiens chemokine (C-C motif) receptor-like 2 (CCRL2), transcript variant 1, mRNA [NM_003965] | 9034 |

|              |     |     |      |     |       |                                                                                                    |       |
|--------------|-----|-----|------|-----|-------|----------------------------------------------------------------------------------------------------|-------|
| A_24_P97405  | 1.0 | 1.0 | -2.5 | 1.0 | CCRL2 | Homo sapiens chemokine (C-C motif) receptor-like 2 (CCRL2), transcript variant 1, mRNA [NM_003965] | 9034  |
| A_23_P127475 | 1.6 | 2.3 | 1.8  | 3.2 | CCS   | Homo sapiens copper chaperone for superoxide dismutase (CCS), mRNA [NM_005125]                     | 9973  |
| A_23_P102420 | 2.3 | 1.6 | 2.2  | 1.3 | CCT4  | Homo sapiens chaperonin containing TCP1, subunit 4 (delta) (CCT4), mRNA [NM_006430]                | 10575 |



|              |      |      |       |      |      |                                                                                                         |       |
|--------------|------|------|-------|------|------|---------------------------------------------------------------------------------------------------------|-------|
| A_24_P328872 | -1.6 | -1.6 | -1.7  | -2.8 | CCT5 | Homo sapiens chaperonin containing TCP1, subunit 5 (epsilon) (CCT5), mRNA [NM_012073]                   | 22948 |
| A_23_P102404 | 4.6  | 4.6  | 8.0   | 6.9  | CCT7 | Homo sapiens chaperonin containing TCP1, subunit 7 (eta) (CCT7), transcript variant 1, mRNA [NM_006429] | 10574 |
| A_24_P936671 | 1.1  | 1.0  | -68.4 | -1.0 | CCT8 | Homo sapiens chaperonin containing TCP1, subunit 8 (theta), mRNA (cDNA clone IMAGE:3930332). [BC005220] | 10694 |

|              |     |      |      |      |         |                                                                                         |        |
|--------------|-----|------|------|------|---------|-----------------------------------------------------------------------------------------|--------|
| A_24_P131066 | 2.9 | 1.0  | -1.0 | 1.1  | CD101   | Homo sapiens CD101 molecule (CD101), mRNA [NM_004258]                                   | 9398   |
| A_23_P354341 | 1.4 | 1.3  | -3.4 | -1.0 | CD160   | Homo sapiens CD160 molecule (CD160), mRNA [NM_007053]                                   | 11126  |
| A_23_P61466  | 1.0 | -2.7 | -1.6 | -1.0 | CD163L1 | Homo sapiens CD163 molecule-like 1 (CD163L1), mRNA [NM_174941]                          | 283316 |
| A_23_P254756 | 2.0 | 1.9  | -1.0 | 1.9  | CD164   | Homo sapiens CD164 molecule, sialomucin (CD164), transcript variant 1, mRNA [NM_006016] | 8763   |
| A_23_P259863 | 5.8 | -1.3 | 1.1  | 1.1  | CD177   | Homo sapiens CD177 molecule (CD177), mRNA [NM_020406]                                   | 57126  |

|              |      |      |       |      |       |                                                                           |       |
|--------------|------|------|-------|------|-------|---------------------------------------------------------------------------|-------|
| A_23_P259868 | 1.0  | 1.3  | 1.2   | 7.5  | CD177 | Homo sapiens CD177 molecule (CD177), mRNA [NM_020406]                     | 57126 |
| A_23_P113572 | 1.1  | 1.0  | 2.7   | -5.1 | CD19  | Homo sapiens CD19 molecule (CD19), transcript variant 2, mRNA [NM_001770] | 930   |
| A_24_P11208  | -6.2 | -1.0 | 1.4   | -1.1 | CD1D  | Homo sapiens CD1d molecule (CD1D), mRNA [NM_001766]                       | 912   |
| A_23_P74575  | -1.0 | -1.1 | -31.9 | -1.3 | CD1D  | Homo sapiens CD1d molecule (CD1D), mRNA [NM_001766]                       | 912   |
| A_23_P201160 | -5.7 | 1.0  | -1.1  | -1.1 | CD1E  | Homo sapiens CD1e molecule (CD1E), transcript variant 1, mRNA [NM_030893] | 913   |

|              |      |      |      |       |         |                                                                                                               |        |
|--------------|------|------|------|-------|---------|---------------------------------------------------------------------------------------------------------------|--------|
| A_23_P161076 | 2.2  | 1.0  | 1.2  | -1.0  | CD2     | Homo sapiens CD2 molecule (CD2), mRNA [NM_001767]                                                             | 914    |
| A_23_P41217  | 1.4  | 1.0  | -2.0 | 2.4   | CD200R1 | Homo sapiens CD200 receptor 1 (CD200R1), transcript variant 1, mRNA [NM_138806]                               | 131450 |
| A_23_P351286 | -6.0 | -3.7 | -2.7 | -4.9  | CD22    | Homo sapiens cDNA: FLJ22814 fis, clone KAIA3004. [AK026467]                                                   | 933    |
| A_23_P85453  | -1.0 | -1.0 | -1.1 | -29.3 | CD244   | Homo sapiens CD244 molecule, natural killer cell receptor 2B4 (CD244), transcript variant 1, mRNA [NM_016382] | 51744  |

|              |      |     |     |      |       |                                                                                                               |       |
|--------------|------|-----|-----|------|-------|---------------------------------------------------------------------------------------------------------------|-------|
| A_24_P105332 | 1.9  | 1.0 | 3.2 | 1.1  | CD244 | Homo sapiens CD244 molecule, natural killer cell receptor 2B4 (CD244), transcript variant 1, mRNA [NM_016382] | 51744 |
| A_23_P52697  | -2.8 | 1.1 | 1.2 | -2.1 | CD248 | Homo sapiens CD248 molecule, endosialin (CD248), mRNA [NM_020404]                                             | 57124 |
| A_23_P91095  | 5.5  | 5.3 | 5.1 | 5.3  | CD28  | Homo sapiens CD28 molecule (CD28), transcript variant 1, mRNA [NM_006139]                                     | 940   |
| A_24_P329152 | 3.7  | 1.3 | 1.5 | -3.3 | CD2AP | Homo sapiens CD2-associated protein (CD2AP), mRNA [NM_012120]                                                 | 23607 |

|              |      |      |      |      |        |                                                                                                           |       |
|--------------|------|------|------|------|--------|-----------------------------------------------------------------------------------------------------------|-------|
| A_32_P155811 | 1.1  | -2.3 | -1.0 | -1.0 | CD2AP  | Homo sapiens CD2-associated protein (CD2AP), mRNA [NM_012120]                                             | 23607 |
| A_24_P236522 | -3.4 | 1.1  | 1.0  | 1.0  | CD2BP2 | Homo sapiens CD2 (cytoplasmic tail) binding protein 2 (CD2BP2), transcript variant 2, mRNA [NM_001243646] | 10421 |
| A_23_P61551  | 15.1 | 7.2  | 7.7  | 12.8 | CD2BP2 | Homo sapiens CD2 (cytoplasmic tail) binding protein 2 (CD2BP2), transcript variant 1, mRNA [NM_006110]    | 10421 |
| A_23_P26771  | 1.6  | 1.8  | 3.3  | 1.9  | CD300C | Homo sapiens CD300c molecule (CD300C), mRNA [NM_006678]                                                   | 10871 |

|              |     |      |      |      |         |                                                                                                    |        |
|--------------|-----|------|------|------|---------|----------------------------------------------------------------------------------------------------|--------|
| A_32_P201564 | 1.1 | 1.1  | -2.2 | -1.0 | CD300E  | Homo sapiens CD300e molecule (CD300E), mRNA [NM_181449]                                            | 342510 |
| A_23_P15369  | 1.5 | 2.9  | 1.8  | 1.2  | CD300LB | Homo sapiens CD300 molecule-like family member b (CD300LB), mRNA [NM_174892]                       | 124599 |
| A_24_P279307 | 1.0 | -2.2 | -1.1 | -1.5 | CD300LF | Homo sapiens CD300 molecule-like family member f (CD300LF), mRNA [NM_139018]                       | 146722 |
| A_23_P38304  | 1.7 | 3.3  | 1.3  | 1.5  | CD300LG | Homo sapiens CD300 molecule-like family member g (CD300LG), transcript variant 1, mRNA [NM_145273] | 146894 |

|              |      |      |      |      |      |                                                                                                        |     |
|--------------|------|------|------|------|------|--------------------------------------------------------------------------------------------------------|-----|
| A_24_P301655 | -1.0 | -1.0 | -2.3 | -1.0 | CD33 | Homo sapiens CD33 molecule (CD33), transcript variant 1, mRNA [NM_001772]                              | 945 |
| A_23_P111583 | -1.7 | 2.0  | 1.7  | -1.2 | CD36 | Homo sapiens CD36 molecule (thrombospondin receptor) (CD36), transcript variant 2, mRNA [NM_001001547] | 948 |
| A_24_P82749  | 2.2  | -3.7 | 2.5  | -1.0 | CD37 | Homo sapiens CD37 molecule (CD37), transcript variant 1, mRNA [NM_001774]                              | 951 |
| A_23_P416747 | 1.3  | 1.1  | 2.7  | 2.2  | CD3E | Homo sapiens CD3e molecule, epsilon (CD3-TCR complex) (CD3E), mRNA [NM_000733]                         | 916 |



|              |      |      |      |      |        |                                                                                   |       |
|--------------|------|------|------|------|--------|-----------------------------------------------------------------------------------|-------|
| A_24_P86968  | 1.4  | 2.0  | 1.4  | 2.2  | CD3E   | Homo sapiens CD3e molecule, epsilon (CD3-TCR complex) (CD3E), mRNA [NM_000733]    | 916   |
| A_24_P267452 | -5.6 | -1.3 | -1.1 | -2.3 | CD3EAP | Homo sapiens CD3e molecule, epsilon associated protein (CD3EAP), mRNA [NM_012099] | 10849 |
| A_24_P295999 | 2.8  | 2.3  | 1.0  | 1.3  | CD4    | Homo sapiens CD4 molecule (CD4), transcript variant 1, mRNA [NM_000616]           | 920   |
| A_23_P62220  | -1.0 | -1.1 | -6.7 | -1.3 | CD40LG | Homo sapiens CD40 ligand (CD40LG), mRNA [NM_000074]                               | 959   |
| A_32_P175934 | 1.1  | 1.0  | -1.0 | -5.0 | CD48   | Homo sapiens CD48 molecule (CD48), mRNA [NM_001778]                               | 962   |

|              |     |      |      |      |      |                                                                                                                                          |      |
|--------------|-----|------|------|------|------|------------------------------------------------------------------------------------------------------------------------------------------|------|
| A_23_P85800  | 1.7 | 2.8  | 2.6  | -1.2 | CD52 | Homo sapiens CD52 molecule (CD52), mRNA [NM_001803]                                                                                      | 1043 |
| A_23_P312008 | 2.0 | 1.3  | -2.9 | 1.2  | CD55 | CD55 molecule, decay accelerating factor for complement (Cromer blood group) [Source:HGNC Symbol;Acc:2665] [ENST00000465534]             | 1604 |
| A_24_P188377 | 1.0 | -1.0 | -2.8 | -2.6 | CD55 | Homo sapiens CD55 molecule, decay accelerating factor for complement (Cromer blood group) (CD55), transcript variant 1, mRNA [NM_000574] | 1604 |

|              |      |      |      |      |      |                                                                                                          |     |
|--------------|------|------|------|------|------|----------------------------------------------------------------------------------------------------------|-----|
| A_23_P138308 | 1.8  | 4.7  | 2.0  | 2.7  | CD58 | Homo sapiens CD58 molecule (CD58), transcript variant 1, mRNA [NM_001779]                                | 965 |
| A_24_P141481 | 1.0  | -1.0 | -1.1 | 2.6  | CD59 | Homo sapiens CD59 molecule, complement regulatory protein (CD59), transcript variant 1, mRNA [NM_203330] | 966 |
| A_23_P139162 | -1.8 | 1.1  | -2.6 | 1.0  | CD6  | Homo sapiens CD6 molecule (CD6), mRNA [NM_006725]                                                        | 923 |
| A_24_P270144 | 2.0  | 2.1  | 1.4  | -1.8 | CD63 | Homo sapiens CD63 molecule (CD63), transcript variant 2, mRNA [NM_001040034]                             | 967 |

|              |      |      |      |      |      |                                                                                                                                          |     |
|--------------|------|------|------|------|------|------------------------------------------------------------------------------------------------------------------------------------------|-----|
| A_23_P15394  | -5.2 | 1.0  | -1.0 | -2.2 | CD68 | Homo sapiens CD68 molecule (CD68), transcript variant 1, mRNA [NM_001251]                                                                | 968 |
| A_23_P70095  | -1.2 | -2.2 | 1.2  | 1.0  | CD74 | Homo sapiens CD74 molecule, major histocompatibility complex, class II invariant chain (CD74), transcript variant 3, mRNA [NM_001025158] | 972 |
| A_23_P155632 | -6.9 | -1.6 | -1.7 | -1.7 | CD80 | Homo sapiens CD80 molecule (CD80), mRNA [NM_005191]                                                                                      | 941 |
| A_23_P13425  | 1.1  | 1.1  | 2.5  | 2.2  | CD81 | Homo sapiens CD81 molecule (CD81), mRNA [NM_004356]                                                                                      | 975 |

|              |      |      |       |      |      |                                                                              |      |
|--------------|------|------|-------|------|------|------------------------------------------------------------------------------|------|
| A_23_P1782   | 3.3  | 2.5  | -10.7 | 1.8  | CD82 | Homo sapiens CD82 molecule (CD82), transcript variant 1, mRNA [NM_002231]    | 3732 |
| A_32_P58215  | 1.1  | 2.2  | 2.2   | 1.1  | CD84 | Homo sapiens CD84 molecule (CD84), transcript variant 1, mRNA [NM_001184879] | 8832 |
| A_23_P159335 | -3.6 | 1.9  | -2.5  | -1.5 | CD8B | Homo sapiens CD8b molecule (CD8B), transcript variant 5, mRNA [NM_004931]    | 926  |
| A_23_P502312 | 1.4  | -4.4 | 2.0   | 1.1  | CD97 | Homo sapiens CD97 molecule (CD97), transcript variant 1, mRNA [NM_078481]    | 976  |

|              |      |     |      |      |        |                                                                                                    |        |
|--------------|------|-----|------|------|--------|----------------------------------------------------------------------------------------------------|--------|
| A_23_P502314 | 2.3  | 2.9 | -1.1 | 1.6  | CD97   | Homo sapiens CD97 molecule (CD97), transcript variant 1, mRNA [NM_078481]                          | 976    |
| A_24_P70993  | -6.1 | 1.0 | -1.1 | -1.1 | CD99   | Homo sapiens CD99 molecule (CD99), transcript variant 1, mRNA [NM_002414]                          | 4267   |
| A_24_P68222  | 1.1  | 1.1 | -2.0 | -1.0 | CD99P1 | Homo sapiens CD99 molecule pseudogene 1 (CD99P1), transcript variant 2, non-coding RNA [NR_033381] | 401577 |
| A_23_P34597  | 5.0  | 4.8 | 1.4  | 2.6  | CDA    | Homo sapiens cytidine deaminase (CDA), mRNA [NM_001785]                                            | 978    |

|              |       |      |      |      |        |                                                                                                                      |        |
|--------------|-------|------|------|------|--------|----------------------------------------------------------------------------------------------------------------------|--------|
| A_24_P177763 | -25.9 | -1.5 | -2.4 | -1.7 | CDADC1 | Homo sapiens cytidine and dCMP deaminase domain containing 1 (CDADC1), transcript variant 1, mRNA [NM_030911]        | 81602  |
| A_23_P20622  | -1.0  | -1.3 | -2.4 | -1.7 | CDC14B | Homo sapiens CDC14 cell division cycle 14 homolog B (S. cerevisiae) (CDC14B), transcript variant 2, mRNA [NM_033331] | 8555   |
| A_23_P367043 | -3.8  | -1.6 | -1.7 | -2.5 | CDC14C | Homo sapiens CDC14 cell division cycle 14 homolog C (S. cerevisiae) (CDC14C), non-coding RNA [NR_003595]             | 168448 |

|              |      |      |      |      |        |                                                                                                           |      |
|--------------|------|------|------|------|--------|-----------------------------------------------------------------------------------------------------------|------|
| A_23_P149200 | 1.0  | 2.6  | 2.3  | 2.2  | CDC20  | Homo sapiens cell division cycle 20 homolog (S. cerevisiae) (CDC20), mRNA [NM_001255]                     | 991  |
| A_24_P913227 | -1.0 | -2.7 | -1.1 | -2.4 | CDC23  | cell division cycle 23 homolog (S. cerevisiae) [Source:HGNC Symbol;Acc:1724] [ENST00000394884]            | 8697 |
| A_23_P70249  | -1.0 | -1.0 | -2.9 | 1.0  | CDC25C | Homo sapiens cell division cycle 25 homolog C (S. pombe) (CDC25C), transcript variant 1, mRNA [NM_001790] | 995  |



|              |      |     |      |      |         |                                                                                                       |        |
|--------------|------|-----|------|------|---------|-------------------------------------------------------------------------------------------------------|--------|
| A_32_P228501 | -2.1 | 1.2 | -1.0 | 1.1  | CDC26   | Homo sapiens cell division cycle 26 homolog (S. cerevisiae) (CDC26), mRNA [NM_139286]                 | 246184 |
| A_24_P177025 | 2.0  | 2.7 | 4.2  | 1.7  | CDC34   | Homo sapiens cell division cycle 34 homolog (S. cerevisiae) (CDC34), mRNA [NM_004359]                 | 997    |
| A_24_P269624 | 1.9  | 1.1 | -1.0 | -6.5 | CDC37L1 | cell division cycle 37 homolog (S. cerevisiae)-like 1 [Source:HGNC Symbol;Acc:17179] [ENST0000381854] | 55664  |

|              |      |      |      |      |       |                                                                                                                     |       |
|--------------|------|------|------|------|-------|---------------------------------------------------------------------------------------------------------------------|-------|
| A_23_P351320 | 2.4  | 1.2  | 1.9  | 3.0  | CDC40 | Homo sapiens cell division cycle 40 homolog (S. cerevisiae) (CDC40), mRNA [NM_015891]                               | 51362 |
| A_23_P200560 | -1.1 | -1.2 | -2.7 | -1.4 | CDC42 | Homo sapiens cell division cycle 42 (GTP binding protein, 25kDa) (CDC42), transcript variant 3, mRNA [NM_001039802] | 998   |
| A_32_P115015 | -2.4 | -2.1 | -4.4 | -2.9 | CDC42 | Homo sapiens cell division cycle 42 (GTP binding protein, 25kDa) (CDC42), transcript variant 3, mRNA [NM_001039802] | 998   |

|              |      |      |      |      |          |                                                                                          |       |
|--------------|------|------|------|------|----------|------------------------------------------------------------------------------------------|-------|
| A_24_P249626 | -4.0 | -1.4 | 1.5  | -1.4 | CDC42BPG | Homo sapiens CDC42 binding protein kinase gamma (DMPK-like) (CDC42BPG), mRNA [NM_017525] | 55561 |
| A_24_P143032 | 1.8  | -3.7 | -1.5 | -1.5 | CDC42EP1 | Homo sapiens CDC42 effector protein (Rho GTPase binding) 1 (CDC42EP1), mRNA [NM_152243]  | 11135 |
| A_23_P166453 | 1.1  | 2.4  | 3.6  | 1.6  | CDC42EP1 | Homo sapiens CDC42 effector protein (Rho GTPase binding) 1 (CDC42EP1), mRNA [NM_152243]  | 11135 |

|              |      |      |      |       |          |                                                                                                |       |
|--------------|------|------|------|-------|----------|------------------------------------------------------------------------------------------------|-------|
| A_23_P1602   | 1.9  | 1.9  | 2.7  | 1.9   | CDC42EP2 | Homo sapiens CDC42 effector protein (Rho GTPase binding) 2 (CDC42EP2), mRNA [NM_006779]        | 10435 |
| A_24_P924697 | -1.0 | -3.0 | -2.0 | -14.0 | CDC42EP3 | CDC42 effector protein (Rho GTPase binding) 3 [Source:HGNC Symbol;Acc:16943] [ENST00000295324] | 10602 |
| A_23_P209636 | 1.0  | 1.0  | -1.0 | 2.3   | CDC42EP3 | Homo sapiens CDC42 effector protein (Rho GTPase binding) 3 (CDC42EP3), mRNA [NM_006449]        | 10602 |

|              |      |      |      |      |          |                                                                                         |        |
|--------------|------|------|------|------|----------|-----------------------------------------------------------------------------------------|--------|
| A_24_P19054  | 2.0  | 1.7  | 1.8  | 1.5  | CDC42EP4 | Homo sapiens CDC42 effector protein (Rho GTPase binding) 4 (CDC42EP4), mRNA [NM_012121] | 23580  |
| A_24_P44916  | 1.1  | 2.2  | -1.6 | 2.0  | CDC42EP5 | Homo sapiens CDC42 effector protein (Rho GTPase binding) 5 (CDC42EP5), mRNA [NM_145057] | 148170 |
| A_24_P409042 | 1.1  | 1.4  | -3.0 | 1.2  | CDC42SE2 | Homo sapiens CDC42 small effector 2 (CDC42SE2), transcript variant 1, mRNA [NM_020240]  | 56990  |
| A_23_P162476 | -2.5 | -1.0 | 1.0  | -1.6 | CDCA3    | Homo sapiens cell division cycle associated 3 (CDCA3), mRNA [NM_031299]                 | 83461  |

|              |      |      |      |      |       |                                                                                               |       |
|--------------|------|------|------|------|-------|-----------------------------------------------------------------------------------------------|-------|
| A_24_P218979 | -1.9 | -2.2 | -1.5 | 1.1  | CDCA3 | Homo sapiens cell division cycle associated 3 (CDCA3), mRNA [NM_031299]                       | 83461 |
| A_24_P133488 | 1.0  | -4.8 | -1.0 | 1.0  | CDCA4 | Homo sapiens cell division cycle associated 4 (CDCA4), transcript variant 1, mRNA [NM_017955] | 55038 |
| A_24_P171549 | 1.1  | -3.1 | -5.0 | -2.3 | CDCA7 | Homo sapiens cell division cycle associated 7 (CDCA7), transcript variant 1, mRNA [NM_031942] | 83879 |

|              |      |      |      |       |        |                                                                                                     |        |
|--------------|------|------|------|-------|--------|-----------------------------------------------------------------------------------------------------|--------|
| A_24_P274795 | -1.7 | -1.9 | -1.6 | -10.3 | CDCA7L | Homo sapiens cell division cycle associated 7-like (CDCA7L), transcript variant 1, mRNA [NM_018719] | 55536  |
| A_23_P32474  | 1.1  | 1.1  | 1.0  | -6.8  | CDCP1  | Homo sapiens CUB domain containing protein 1 (CDCP1), transcript variant 1, mRNA [NM_022842]        | 64866  |
| A_24_P357997 | 1.1  | -2.1 | -1.1 | -1.0  | CDCP2  | Homo sapiens CUB domain containing protein 2 (CDCP2), mRNA [NM_201546]                              | 200008 |
| A_23_P152305 | 2.1  | 2.0  | 1.9  | 1.9   | CDH11  | Homo sapiens cadherin 11, type 2, OB-cadherin (osteoblast) (CDH11), mRNA [NM_001797]                | 1009   |

|              |      |      |      |      |       |                                                                                        |       |
|--------------|------|------|------|------|-------|----------------------------------------------------------------------------------------|-------|
| A_32_P10936  | 2.7  | 2.3  | 1.4  | -3.7 | CDH12 | Homo sapiens cadherin 12, type 2 (N-cadherin 2) (CDH12), mRNA [NM_004061]              | 1010  |
| A_32_P25357  | 2.7  | -1.1 | 1.8  | -1.1 | CDH15 | Homo sapiens cadherin 15, type 1, M-cadherin (myotubule) (CDH15), mRNA [NM_004933]     | 1013  |
| A_23_P100240 | 1.0  | -2.8 | 1.5  | -1.1 | CDH16 | Homo sapiens cadherin 16, KSP-cadherin (CDH16), transcript variant 1, mRNA [NM_004062] | 1014  |
| A_23_P38735  | -3.9 | 1.1  | -3.5 | -1.2 | CDH19 | Homo sapiens cadherin 19, type 2 (CDH19), mRNA [NM_021153]                             | 28513 |



|              |      |      |      |      |       |                                                                                  |       |
|--------------|------|------|------|------|-------|----------------------------------------------------------------------------------|-------|
| A_23_P55586  | 1.2  | 1.2  | 1.2  | -3.0 | CDH20 | Homo sapiens cadherin 20, type 2 (CDH20), mRNA [NM_031891]                       | 28316 |
| A_23_P40192  | -1.3 | 1.5  | -5.3 | 1.2  | CDH22 | Homo sapiens cadherin 22, type 2 (CDH22), mRNA [NM_021248]                       | 64405 |
| A_23_P307968 | 1.4  | 1.1  | -1.0 | -2.8 | CDH23 | Homo sapiens cadherin-related 23 (CDH23), transcript variant 2, mRNA [NM_052836] | 64072 |
| A_23_P405267 | -3.0 | 1.0  | 1.0  | 1.0  | CDH24 | Homo sapiens cDNA FLJ25193 fis, clone JTH00761. [AK057922]                       | 64403 |
| A_24_P113458 | 1.1  | -6.0 | -2.7 | 1.0  | CDH26 | cadherin 26 [Source:HGNC Symbol;Acc:15902] [ENST00000244049]                     | 60437 |

|              |      |     |      |      |      |                                                                                                      |      |
|--------------|------|-----|------|------|------|------------------------------------------------------------------------------------------------------|------|
|              |      |     |      |      |      | Homo sapiens cadherin 3, type 1, P-cadherin (placental) (CDH3), mRNA [NM_001793]                     |      |
| A_23_P49155  | 2.1  | 1.3 | 1.9  | 1.3  | CDH3 |                                                                                                      | 1001 |
| A_24_P940656 | -2.6 | 1.0 | -1.0 | -2.2 | CDH4 | GB                                                                                                   | 1002 |
|              |      |     |      |      |      | Homo sapiens cadherin 4, type 1, R-cadherin (retinal) (CDH4), transcript variant 1, mRNA [NM_001794] |      |
| A_23_P28999  | 1.1  | 1.2 | -1.3 | 2.1  | CDH4 |                                                                                                      | 1002 |
|              |      |     |      |      |      | Homo sapiens cadherin 6, type 2, K-cadherin (fetal kidney) (CDH6), mRNA [NM_004932]                  |      |
| A_23_P214011 | -3.3 | 1.4 | 2.5  | 1.0  | CDH6 |                                                                                                      | 1004 |
|              |      |     |      |      |      | Homo sapiens cadherin 7, type 2 (CDH7), transcript variant b, mRNA [NM_004361]                       |      |
| A_24_P382287 | 2.4  | 2.8 | 4.0  | 1.4  | CDH7 |                                                                                                      | 1005 |

|              |      |      |     |      |       |                                                                                                  |       |
|--------------|------|------|-----|------|-------|--------------------------------------------------------------------------------------------------|-------|
| A_23_P140797 | 1.4  | 1.4  | 2.9 | 1.1  | CDH8  | Homo sapiens cadherin 8, type 2 (CDH8), mRNA [NM_001796]                                         | 1006  |
| A_23_P92999  | 2.9  | 2.9  | 1.3 | 2.4  | CDH9  | Homo sapiens cadherin 9, type 2 (T1-cadherin) (CDH9), mRNA [NM_016279]                           | 1007  |
| A_24_P358805 | 4.3  | 4.3  | 4.3 | 2.2  | CDHR1 | Homo sapiens cadherin-related family member 1 (CDHR1), transcript variant 2, mRNA [NM_001171971] | 92211 |
| A_23_P149946 | -1.0 | -5.7 | 1.4 | -1.0 | CDHR1 | Homo sapiens cadherin-related family member 1 (CDHR1), transcript variant 1, mRNA [NM_033100]    | 92211 |

|              |      |      |      |      |        |                                                                                           |        |
|--------------|------|------|------|------|--------|-------------------------------------------------------------------------------------------|--------|
| A_24_P16143  | -1.5 | -1.9 | -2.2 | -2.2 | CDHR4  | Homo sapiens cadherin-related family member 4 (CDHR4), mRNA [NM_001007540]                | 389118 |
| A_24_P65199  | 2.8  | 1.1  | -1.2 | 1.2  | CDK10  | Homo sapiens cyclin-dependent kinase 10 (CDK10), transcript variant b, mRNA [NM_052987]   | 8558   |
| A_23_P152245 | 2.5  | 1.9  | 1.4  | 2.3  | CDK10  | Homo sapiens cyclin-dependent kinase 10 (CDK10), transcript variant b, mRNA [NM_052987]   | 8558   |
| A_24_P312915 | -1.5 | -1.4 | -4.6 | -1.4 | CDK11B | Homo sapiens cyclin-dependent kinase 11B (CDK11B), transcript variant 5, mRNA [NM_033489] | 984    |

|              |      |      |      |      |        |                                                                                           |       |
|--------------|------|------|------|------|--------|-------------------------------------------------------------------------------------------|-------|
| A_24_P355772 | -1.0 | -1.0 | -2.9 | -1.0 | CDK11B | Homo sapiens cyclin-dependent kinase 11B (CDK11B), transcript variant 5, mRNA [NM_033489] | 984   |
| A_23_P217804 | -2.4 | -1.9 | -2.5 | -1.9 | CDK11B | Homo sapiens cyclin-dependent kinase 11B (CDK11B), transcript variant 3, mRNA [NM_033487] | 984   |
| A_24_P198820 | 1.0  | -1.7 | -2.6 | 1.0  | CDK12  | Homo sapiens cyclin-dependent kinase 12 (CDK12), transcript variant 1, mRNA [NM_016507]   | 51755 |
| A_23_P159119 | -2.3 | 1.7  | 1.2  | 1.3  | CDK12  | Homo sapiens cyclin-dependent kinase 12 (CDK12), transcript variant 1, mRNA [NM_016507]   | 51755 |

|              |      |      |      |       |       |                                                                                         |       |
|--------------|------|------|------|-------|-------|-----------------------------------------------------------------------------------------|-------|
| A_23_P154050 | 1.3  | 1.3  | 1.3  | -3.8  | CDK15 | Homo sapiens cyclin-dependent kinase 15 (CDK15), mRNA [NM_139158]                       | 65061 |
| A_24_P233663 | -1.2 | -1.4 | -1.4 | -23.2 | CDK16 | Homo sapiens cyclin-dependent kinase 16 (CDK16), transcript variant 2, mRNA [NM_033018] | 5127  |
| A_23_P33376  | 3.6  | 5.2  | 2.3  | 7.6   | CDK17 | Homo sapiens cyclin-dependent kinase 17 (CDK17), transcript variant 1, mRNA [NM_002595] | 5128  |
| A_24_P699896 | 1.0  | -4.3 | -1.7 | -1.1  | CDK19 | cyclin-dependent kinase 19 [Source:HGNC Symbol;Acc:19338] [ENST00000497709]             | 23097 |

|              |      |     |      |     |         |                                                                                               |       |
|--------------|------|-----|------|-----|---------|-----------------------------------------------------------------------------------------------|-------|
| A_24_P343289 | 1.7  | 1.5 | -1.5 | 2.9 | CDK19   | Homo sapiens cyclin-dependent kinase 19 (CDK19), mRNA [NM_015076]                             | 23097 |
| A_23_P104579 | 1.4  | 1.3 | -1.4 | 2.8 | CDK2AP2 | Homo sapiens cyclin-dependent kinase 2 associated protein 2 (CDK2AP2), mRNA [NM_005851]       | 10263 |
| A_23_P24997  | 3.1  | 3.0 | 1.1  | 8.4 | CDK4    | Homo sapiens cyclin-dependent kinase 4 (CDK4), mRNA [NM_000075]                               | 1019  |
| A_23_P141467 | -1.3 | 2.3 | 1.2  | 1.9 | CDK5R1  | Homo sapiens cyclin-dependent kinase 5, regulatory subunit 1 (p35) (CDK5R1), mRNA [NM_003885] | 8851  |

|             |      |      |      |      |          |                                                                                                              |       |
|-------------|------|------|------|------|----------|--------------------------------------------------------------------------------------------------------------|-------|
| A_23_P79323 | 2.8  | -2.8 | 1.1  | 2.2  | CDK5R2   | Homo sapiens cyclin-dependent kinase 5, regulatory subunit 2 (p39) (CDK5R2), mRNA [NM_003936]                | 8941  |
| A_24_P51683 | -1.1 | 1.1  | 8.6  | 1.1  | CDK5R2   | Homo sapiens cyclin-dependent kinase 5, regulatory subunit 2 (p39) (CDK5R2), mRNA [NM_003936]                | 8941  |
| A_23_P83110 | -5.6 | -5.1 | -5.2 | -1.5 | CDK5RAP2 | Homo sapiens CDK5 regulatory subunit associated protein 2 (CDK5RAP2), transcript variant 1, mRNA [NM_018249] | 55755 |



|              |      |      |      |       |          |                                                                                             |       |
|--------------|------|------|------|-------|----------|---------------------------------------------------------------------------------------------|-------|
| A_24_P292964 | 2.2  | 2.2  | 2.0  | -1.1  | CDK5RAP3 | Homo sapiens CDK5 regulatory subunit associated protein 3 (CDK5RAP3), mRNA [NM_176096]      | 80279 |
| A_23_P44781  | -1.7 | -2.7 | -1.4 | 1.3   | CDKAL1   | Homo sapiens CDK5 regulatory subunit associated protein 1-like 1 (CDKAL1), mRNA [NM_017774] | 54901 |
| A_23_P110643 | 2.5  | 1.5  | 1.3  | 3.0   | CDKL3    | Homo sapiens cyclin-dependent kinase-like 3 (CDKL3), transcript variant 2, mRNA [NM_016508] | 51265 |
| A_23_P204696 | 1.0  | -4.8 | -1.0 | -67.0 | CDKN1B   | Homo sapiens cyclin-dependent kinase inhibitor 1B (p27, Kip1) (CDKN1B), mRNA [NM_004064]    | 1027  |

|              |      |      |      |      |          |                                                                                                                                   |       |
|--------------|------|------|------|------|----------|-----------------------------------------------------------------------------------------------------------------------------------|-------|
| A_23_P43490  | 1.5  | -1.2 | -4.2 | -2.0 | CDKN2A   | Homo sapiens cyclin-dependent kinase inhibitor 2A (melanoma, p16, inhibits CDK4) (CDKN2A), transcript variant 3, mRNA [NM_058197] | 1029  |
| A_23_P258002 | 1.1  | -2.7 | -2.9 | -1.0 | CDKN2AIP | Homo sapiens CDKN2A interacting protein (CDKN2AIP), mRNA [NM_017632]                                                              | 55602 |
| A_24_P360674 | -2.5 | 1.3  | 1.3  | -1.0 | CDKN2B   | Homo sapiens cyclin-dependent kinase inhibitor 2B (p15, inhibits CDK4) (CDKN2B), transcript variant 2, mRNA [NM_078487]           | 1030  |

|              |        |      |      |      |        |                                                                                        |        |
|--------------|--------|------|------|------|--------|----------------------------------------------------------------------------------------|--------|
| A_23_P14957  | 1.5    | 2.3  | 1.3  | 1.5  | CDR2   | Homo sapiens cerebellar degeneration-related protein 2, 62kDa (CDR2), mRNA [NM_001802] | 1039   |
| A_24_P339071 | 1.2    | -2.7 | 1.2  | 1.2  | CDR2   | Homo sapiens cerebellar degeneration-related protein 2, 62kDa (CDR2), mRNA [NM_001802] | 1039   |
| A_23_P352426 | 1.2    | 1.1  | -3.2 | -1.0 | CDRT1  | Homo sapiens CMT1A duplicated region transcript 1 (CDRT1), mRNA [NM_006382]            | 374286 |
| A_24_P756766 | -153.4 | -1.7 | -1.8 | -1.7 | CDRT15 | Homo sapiens CMT1A duplicated region transcript 15 (CDRT15), mRNA [NM_00107530]        | 146822 |

|              |     |     |      |     |      |                                                                                                        |       |
|--------------|-----|-----|------|-----|------|--------------------------------------------------------------------------------------------------------|-------|
| A_23_P154698 | 1.6 | 2.3 | -2.8 | 1.5 | CDS2 | Homo sapiens CDP-diacylglycerol synthase (phosphatidate cytidyltransferase) 2 (CDS2), mRNA [NM_003818] | 8760  |
| A_23_P70520  | 1.6 | 2.4 | -1.4 | 1.5 | CDSN | Homo sapiens corneodesmosin (CDSN), mRNA [NM_001264]                                                   | 1041  |
| A_23_P259413 | 2.9 | 1.7 | 1.7  | 2.1 | CDV3 | Homo sapiens CDV3 homolog (mouse) (CDV3), transcript variant 2, mRNA [NM_017548]                       | 55573 |

|             |      |      |      |      |          |                                                                                                                                                    |       |
|-------------|------|------|------|------|----------|----------------------------------------------------------------------------------------------------------------------------------------------------|-------|
| A_23_P55738 | 14.8 | 25.4 | 15.6 | 2.5  | CEACAM1  | Homo sapiens carcinoembryonic antigen-related cell adhesion molecule 1 (biliary glycoprotein) (CEACAM1), transcript variant 2, mRNA [NM_001024912] | 634   |
| A_32_P53234 | 1.5  | -1.1 | -1.1 | -2.5 | CEACAM21 | carcinoembryonic antigen-related cell adhesion molecule 21 [Source:HGNC Symbol;Acc:28834] [ENST00000487420]                                        | 90273 |

|              |      |      |      |     |          |                                                                                                                             |       |
|--------------|------|------|------|-----|----------|-----------------------------------------------------------------------------------------------------------------------------|-------|
| A_23_P78595  | -1.0 | -4.3 | -1.0 | 1.4 | CEACAM21 | Homo sapiens carcinoem bryonic antigen-related cell adhesion molecule 21 (CEACAM21), transcript variant 2, mRNA [NM_033543] | 90273 |
| A_23_P130515 | 2.6  | 1.4  | 2.5  | 2.4 | CEACAM3  | Homo sapiens carcinoem bryonic antigen-related cell adhesion molecule 3 (CEACAM3), mRNA [NM_001815]                         | 1084  |
| A_23_P153301 | 6.1  | 6.0  | 1.2  | 6.0 | CEACAM5  | Homo sapiens carcinoem bryonic antigen-related cell adhesion molecule 5 (CEACAM5), mRNA [NM_004363]                         | 1048  |

|              |      |      |     |       |         |                                                                                                                                                                                    |      |
|--------------|------|------|-----|-------|---------|------------------------------------------------------------------------------------------------------------------------------------------------------------------------------------|------|
| A_23_P421483 | 1.0  | -1.0 | 1.3 | -10.8 | CEACAM6 | Homo sapiens carcinoem bryonic antigen-related cell adhesion molecule 6 (non-specific cross reacting antigen), mRNA (cDNA clone MGC:10467 IMAGE:3640231), complete cds. [BC005008] | 4680 |
| A_24_P228302 | -1.2 | 1.4  | 2.2 | 1.4   | CEACAM7 | Homo sapiens carcinoem bryonic antigen-related cell adhesion molecule 7 (CEACAM7), mRNA [NM_006890]                                                                                | 1087 |

|              |      |      |      |      |         |                                                                                                    |      |
|--------------|------|------|------|------|---------|----------------------------------------------------------------------------------------------------|------|
| A_23_P380240 | 1.3  | -1.9 | -2.2 | -1.3 | CEACAM8 | Homo sapiens carcinoembryonic antigen-related cell adhesion molecule 8 (CEACAM8), mRNA [NM_001816] | 1088 |
| A_23_P375494 | 1.8  | 1.7  | 1.6  | 3.6  | CEBPA   | Homo sapiens CCAAT/enhancer binding protein (C/EBP), alpha (CEBPA), mRNA [NM_004364]               | 1050 |
| A_24_P224727 | -1.6 | -2.9 | -1.0 | -1.0 | CEBPA   | Homo sapiens CCAAT/enhancer binding protein (C/EBP), alpha (CEBPA), mRNA [NM_004364]               | 1050 |



|              |      |     |      |      |       |                                                                                                              |       |
|--------------|------|-----|------|------|-------|--------------------------------------------------------------------------------------------------------------|-------|
| A_24_P216165 | 1.8  | 1.5 | -1.8 | 2.4  | CEBPA | Homo sapiens CCAAT/enhancer binding protein (C/EBP), alpha (CEBPA), mRNA [NM_004364]                         | 1050  |
| A_23_P2990   | 4.2  | 7.2 | 6.8  | 1.1  | CEBPE | Homo sapiens CCAAT/enhancer binding protein (C/EBP), epsilon (CEBPE), mRNA [NM_001805]                       | 1053  |
| A_23_P68773  | -1.3 | 6.2 | 1.3  | -1.4 | CECR1 | Homo sapiens cat eye syndrome chromosome region, candidate 1 (CECR1), transcript variant 1, mRNA [NM_017424] | 51816 |

|              |      |       |      |      |       |                                                                                                           |           |
|--------------|------|-------|------|------|-------|-----------------------------------------------------------------------------------------------------------|-----------|
| A_23_P211326 | 1.8  | -2.7  | 1.2  | 1.6  | CECR2 | Homo sapiens cat eye syndrome chromosome region, candidate 2 (CECR2), mRNA [NM_031413]                    | 27443     |
| A_24_P403501 | 1.4  | -10.3 | 1.8  | 1.5  | CECR7 | Homo sapiens cat eye syndrome chromosome region, candidate 7, mRNA (cDNA clone IMAGE:5289002). [BC043198] | 100130418 |
| A_23_P169503 | -3.1 | 1.2   | -2.0 | -3.5 | CEL   | Homo sapiens carboxyl ester lipase (bile salt-stimulated lipase) (CEL), mRNA [NM_001807]                  | 1056      |

|              |      |      |      |      |        |                                                                                               |       |
|--------------|------|------|------|------|--------|-----------------------------------------------------------------------------------------------|-------|
| A_23_P123794 | 1.0  | 1.6  | -3.2 | 1.1  | CEL    | Homo sapiens carboxyl ester lipase (bile salt-stimulated lipase) (CEL), mRNA [NM_001807]      | 1056  |
| A_23_P46238  | 2.1  | 1.1  | 2.0  | 1.0  | CELA2A | Homo sapiens chymotrypsin-like elastase family, member 2A (CELA2A), mRNA [NM_033440]          | 63036 |
| A_23_P200579 | -1.0 | -2.8 | -1.1 | -1.0 | CELA3B | Homo sapiens chymotrypsin-like elastase family, member 3B (CELA3B), mRNA [NM_007352]          | 23436 |
| A_23_P318396 | -1.9 | -1.4 | -1.7 | -2.4 | CELF1  | Homo sapiens CUGBP, Elav-like family member 1 (CELF1), transcript variant 2, mRNA [NM_198700] | 10658 |

|              |      |      |      |      |        |                                                                                                                       |       |
|--------------|------|------|------|------|--------|-----------------------------------------------------------------------------------------------------------------------|-------|
| A_23_P337849 | 1.1  | -1.2 | -6.7 | -1.0 | CELF3  | Homo sapiens CUGBP, Elav-like family member 3 (CELF3), transcript variant 1, mRNA [NM_007185]                         | 11189 |
| A_24_P933572 | -1.5 | -6.9 | 1.7  | 1.0  | CELF4  | Homo sapiens cDNA FLJ34375 fis, clone FEBRA2017533. [AK091694]                                                        | 56853 |
| A_24_P182620 | 1.1  | 1.1  | -4.4 | 1.1  | CELSR2 | Homo sapiens cadherin, EGF LAG seven-pass G-type receptor 2 (flamingo homolog, Drosophila) (CELSR2), mRNA [NM_001408] | 1952  |

|              |     |     |      |     |         |                                                                                                                       |       |
|--------------|-----|-----|------|-----|---------|-----------------------------------------------------------------------------------------------------------------------|-------|
| A_23_P201570 | 1.9 | 1.4 | 3.2  | 1.6 | CELSR2  | Homo sapiens cadherin, EGF LAG seven-pass G-type receptor 2 (flamingo homolog, Drosophila) (CELSR2), mRNA [NM_001408] | 1952  |
| A_24_P312845 | 2.3 | 1.5 | -1.2 | 1.3 | CEND1   | Homo sapiens cell cycle exit and neuronal differentiation 1 (CEND1), mRNA [NM_016564]                                 | 51286 |
| A_23_P257905 | 2.0 | 1.6 | -1.4 | 2.4 | CENPB   | Homo sapiens centromere protein B, 80kDa (CENPB), mRNA [NM_001810]                                                    | 1059  |
| A_23_P206454 | 1.8 | 2.7 | 3.4  | 2.0 | CENPBD1 | Homo sapiens CENPB DNA-binding domains containing 1 (CENPBD1), mRNA [NM_145039]                                       | 92806 |

|              |       |      |      |      |       |                                                                                   |        |
|--------------|-------|------|------|------|-------|-----------------------------------------------------------------------------------|--------|
| A_23_P252292 | -4.5  | 1.2  | 1.2  | 1.1  | CENPI | Homo sapiens centromere protein I (CENPI), mRNA [NM_006733]                       | 2491   |
| A_24_P298996 | -3.1  | -1.2 | -2.8 | -1.2 | CENPJ | Homo sapiens centromere protein J (CENPJ), mRNA [NM_018451]                       | 55835  |
| A_24_P930100 | -1.0  | -2.8 | -1.1 | -1.0 | CENPL | centromere protein L [Source:HGNC Symbol;Acc:17879] [ENST00000495275]             | 91687  |
| A_24_P392109 | 1.0   | -1.0 | -4.9 | -1.1 | CENPN | Homo sapiens centromere protein N (CENPN), transcript variant 3, mRNA [NM_018455] | 55839  |
| A_32_P119174 | -12.0 | 1.0  | -1.0 | -1.0 | CENPP | Homo sapiens centromere protein P (CENPP), mRNA [NM_001012267]                    | 401541 |

|              |      |      |      |      |        |                                                                             |        |
|--------------|------|------|------|------|--------|-----------------------------------------------------------------------------|--------|
| A_23_P313828 | -2.0 | -1.6 | -1.1 | 2.0  | CENPV  | Homo sapiens centromere protein V (CENPV), mRNA [NM_181716]                 | 201161 |
| A_23_P200047 | 2.0  | 2.0  | 2.0  | -1.7 | CEP104 | Homo sapiens centrosomal protein 104kDa (CEP104), mRNA [NM_014704]          | 9731   |
| A_23_P320829 | -2.7 | -2.8 | -1.0 | -1.1 | CEP128 | Homo sapiens centrosomal protein 128kDa (CEP128), mRNA [NM_152446]          | 145508 |
| A_23_P18479  | 1.5  | 1.5  | 3.1  | 1.1  | CEP135 | centrosomal protein 135kDa [Source:HGNC Symbol;Acc:29086] [ENST00000422247] | 9662   |

|              |      |      |      |      |        |                                                                                          |       |
|--------------|------|------|------|------|--------|------------------------------------------------------------------------------------------|-------|
| A_32_P220519 | -1.0 | -1.0 | -2.9 | -1.0 | CEP152 | Homo sapiens centrosomal protein 152kDa (CEP152), transcript variant 2, mRNA [NM_014985] | 22995 |
| A_24_P652700 | -2.2 | -1.0 | -1.1 | 1.0  | CEP152 | Homo sapiens centrosomal protein 152kDa (CEP152), transcript variant 2, mRNA [NM_014985] | 22995 |
| A_32_P14978  | 1.0  | -1.7 | -1.1 | -2.2 | CEP152 | Homo sapiens centrosomal protein 152kDa (CEP152), transcript variant 2, mRNA [NM_014985] | 22995 |
| A_24_P389843 | -2.0 | -1.0 | -1.2 | -2.0 | CEP164 | Homo sapiens centrosomal protein 164kDa (CEP164), mRNA [NM_014956]                       | 22897 |



|              |      |      |      |      |        |                                                                                              |       |
|--------------|------|------|------|------|--------|----------------------------------------------------------------------------------------------|-------|
| A_24_P36944  | -2.1 | -2.1 | -2.2 | -4.0 | CEP170 | Homo sapiens centrosomal protein 170kDa (CEP170), transcript variant alpha, mRNA [NM_014812] | 9859  |
| A_32_P212058 | 1.0  | -2.9 | -1.1 | -1.1 | CEP19  | Homo sapiens centrosomal protein 19kDa (CEP19), mRNA [NM_032898]                             | 84984 |
| A_23_P102832 | 1.9  | 2.2  | -1.7 | 3.1  | CEP250 | Homo sapiens centrosomal protein 250kDa (CEP250), mRNA [NM_007186]                           | 11190 |
| A_24_P51067  | -2.6 | -2.5 | -2.5 | -2.3 | CEP290 | Homo sapiens centrosomal protein 290kDa (CEP290), mRNA [NM_025114]                           | 80184 |

|              |      |      |      |      |         |                                                                                                 |        |
|--------------|------|------|------|------|---------|-------------------------------------------------------------------------------------------------|--------|
| A_23_P115872 | 12.2 | 11.7 | 11.0 | 11.0 | CEP55   | Homo sapiens centrosomal protein 55kDa (CEP55), transcript variant 1, mRNA [NM_018131]          | 55165  |
| A_23_P86822  | -1.5 | -1.4 | -2.9 | -1.5 | CEP57   | Homo sapiens centrosomal protein 57kDa (CEP57), transcript variant 1, mRNA [NM_014679]          | 9702   |
| A_24_P189112 | -1.0 | -1.2 | -3.3 | -1.0 | CEP57L1 | Homo sapiens centrosomal protein 57kDa-like 1 (CEP57L1), transcript variant 2, mRNA [NM_173830] | 285753 |

|              |      |       |      |      |         |                                                                                                 |        |
|--------------|------|-------|------|------|---------|-------------------------------------------------------------------------------------------------|--------|
| A_23_P59358  | 1.2  | -2.7  | 1.3  | 1.1  | CEP57L1 | Homo sapiens centrosomal protein 57kDa-like 1 (CEP57L1), transcript variant 2, mRNA [NM_173830] | 285753 |
| A_23_P21409  | -2.4 | -10.6 | 1.4  | -1.1 | CEP63   | Homo sapiens centrosomal protein 63kDa (CEP63), transcript variant 4, mRNA [NM_001042384]       | 80254  |
| A_23_P210323 | 1.0  | -5.2  | -1.1 | 1.0  | CEP68   | Homo sapiens centrosomal protein 68kDa (CEP68), mRNA [NM_015147]                                | 23177  |
| A_23_P353436 | -1.2 | -1.2  | -1.8 | -4.3 | CEP78   | centrosomal protein 78kDa [Source:HGNC Symbol;Acc:25740] [ENST00000447629]                      | 84131  |

|              |      |      |      |      |       |                                                                            |       |
|--------------|------|------|------|------|-------|----------------------------------------------------------------------------|-------|
| A_23_P200874 | -2.4 | -5.2 | -5.3 | -7.8 | CEP85 | Homo sapiens centrosomal protein 85kDa (CEP85), mRNA [NM_022778]           | 64793 |
| A_24_P920355 | 4.5  | 4.5  | 4.5  | 4.4  | CEP97 | centrosomal protein 97kDa [Source:HGNC Symbol;Acc:26244] [ENST00000341893] | 79598 |
| A_24_P418294 | 1.5  | 1.5  | 1.4  | 2.3  | CEP97 | Homo sapiens centrosomal protein 97kDa (CEP97), mRNA [NM_024548]           | 79598 |
| A_24_P62237  | -1.0 | -1.2 | -1.1 | -2.8 | CERK  | Homo sapiens ceramide kinase (CERK), mRNA [NM_022766]                      | 64781 |
| A_23_P211659 | 1.2  | -3.6 | 1.1  | -1.0 | CERK  | Homo sapiens ceramide kinase (CERK), mRNA [NM_022766]                      | 64781 |

|              |      |      |      |      |       |                                                                                 |        |
|--------------|------|------|------|------|-------|---------------------------------------------------------------------------------|--------|
| A_24_P943017 | 28.9 | 25.3 | 29.4 | 26.2 | CERS3 | Homo sapiens ceramide synthase 3 (CERS3), mRNA [NM_178842]                      | 204219 |
| A_23_P153867 | 1.7  | 1.4  | -5.1 | -1.0 | CERS4 | Homo sapiens ceramide synthase 4 (CERS4), mRNA [NM_024552]                      | 79603  |
| A_23_P206733 | -6.7 | 1.2  | 1.0  | 1.1  | CES1  | Homo sapiens carboxyles terase 1 (CES1), transcript variant 3, mRNA [NM_001266] | 1066   |
| A_23_P49192  | -5.2 | -1.5 | -7.9 | -4.0 | CES2  | Homo sapiens carboxyles terase 2 (CES2), transcript variant 2, mRNA [NM_198061] | 8824   |
| A_24_P13790  | -2.3 | 1.0  | -1.0 | 1.0  | CES2  | Homo sapiens carboxyles terase 2 (CES2), transcript variant 1, mRNA [NM_003869] | 8824   |

|              |      |      |      |      |       |                                                                                   |        |
|--------------|------|------|------|------|-------|-----------------------------------------------------------------------------------|--------|
| A_23_P361544 | 2.1  | 2.0  | 1.9  | 2.0  | CES4A | Homo sapiens carboxyl esterase 4A (CES4A), transcript variant 1, mRNA [NM_173815] | 283848 |
| A_24_P270674 | -2.0 | -1.5 | -2.8 | -3.5 | CES5A | Homo sapiens carboxyl esterase 5A (CES5A), transcript variant 2, mRNA [NM_145024] | 221223 |
| A_23_P118234 | 1.0  | 1.1  | -1.1 | -2.0 | CES5A | Homo sapiens carboxyl esterase 5A (CES5A), transcript variant 2, mRNA [NM_145024] | 221223 |
| A_23_P66967  | -4.6 | -2.0 | -1.3 | -1.3 | CETN1 | Homo sapiens centrin, EF-hand protein, 1 (CETN1), mRNA [NM_004066]                | 1068   |

|              |      |      |      |      |       |                                                                           |       |
|--------------|------|------|------|------|-------|---------------------------------------------------------------------------|-------|
| A_23_P119562 | -1.6 | 3.7  | 2.4  | 2.8  | CFD   | Homo sapiens complement factor D (adipsin) (CFD), mRNA [NM_001928]        | 1675  |
| A_23_P89123  | -4.0 | 1.0  | -1.5 | 1.2  | CFDP1 | Homo sapiens craniofacial development protein 1 (CFDP1), mRNA [NM_006324] | 10428 |
| A_23_P23759  | 1.0  | -1.0 | -1.0 | -2.1 | CFHR5 | Homo sapiens complement factor H-related 5 (CFHR5), mRNA [NM_030787]      | 81494 |
| A_23_P7212   | 32.0 | 31.6 | 30.4 | 31.0 | CFI   | Homo sapiens complement factor I (CFI), mRNA [NM_000204]                  | 3426  |
| A_24_P92472  | 3.6  | 3.4  | 3.0  | 1.1  | CFI   | Homo sapiens complement factor I (CFI), mRNA [NM_000204]                  | 3426  |

|              |     |     |     |     |        |                                                                                                         |        |
|--------------|-----|-----|-----|-----|--------|---------------------------------------------------------------------------------------------------------|--------|
| A_23_P395493 | 3.0 | 1.6 | 2.1 | 1.2 | CFL1P1 | Homo sapiens cofilin 1 (non-muscle) pseudogene 1 (CFL1P1), non-coding RNA [NR_028492]                   | 142913 |
| A_23_P65401  | 2.5 | 2.1 | 2.1 | 2.1 | CFL2   | Homo sapiens cofilin 2 (muscle) (CFL2), transcript variant 1, mRNA [NM_021914]                          | 1073   |
| A_23_P156807 | 6.0 | 3.7 | 3.5 | 1.4 | CFLAR  | Homo sapiens CASP8 and FADD-like apoptosis regulator (CFLAR), transcript variant 8, mRNA [NM_001202519] | 8837   |
| A_23_P22444  | 2.5 | 1.3 | 1.6 | 1.7 | CFP    | Homo sapiens complement factor properdin (CFP), transcript variant 1, mRNA [NM_002621]                  | 5199   |



|              |      |      |      |      |      |                                                                                                     |        |
|--------------|------|------|------|------|------|-----------------------------------------------------------------------------------------------------|--------|
| A_24_P371782 | -3.5 | 1.3  | -1.2 | 1.3  | CGA  | Homo sapiens glycoprotein hormones, alpha polypeptide (CGA), transcript variant 2, mRNA [NM_000735] | 1081   |
| A_32_P45462  | -4.8 | -1.6 | 1.0  | -2.7 | CGA  | Homo sapiens mRNA expressed only in placental villi, clone SMAP84. [AB019569]                       | 1081   |
| A_24_P395814 | 2.0  | 1.6  | 2.1  | -1.6 | CGB  | Homo sapiens chorionic gonadotropin, beta polypeptide (CGB), mRNA [NM_000737]                       | 1082   |
| A_23_P39095  | -2.6 | -1.8 | -1.9 | -1.9 | CGB1 | Homo sapiens chorionic gonadotropin, beta polypeptide 1 (CGB1), mRNA [NM_033377]                    | 114335 |

|              |      |      |      |      |        |                                                                                                       |       |
|--------------|------|------|------|------|--------|-------------------------------------------------------------------------------------------------------|-------|
| A_23_P155276 | 3.1  | 2.9  | 1.7  | 3.1  | CGGBP1 | Homo sapiens CGG triplet repeat binding protein 1 (CGGBP1), transcript variant 1, mRNA [NM_001008390] | 8545  |
| A_23_P149390 | -2.1 | -1.2 | -1.2 | -1.6 | CGN    | Homo sapiens cingulin (CGN), mRNA [NM_020770]                                                         | 57530 |
| A_24_P135319 | 1.4  | 1.5  | 2.4  | 1.3  | CGNL1  | Homo sapiens cingulin-like 1 (CGNL1), transcript variant 2, mRNA [NM_032866]                          | 84952 |
| A_23_P37275  | -1.1 | -3.4 | -1.2 | -1.2 | CGRRF1 | Homo sapiens cell growth regulator with ring finger domain 1 (CGRRF1), mRNA [NM_006568]               | 10668 |

|              |      |      |       |      |        |                                                                                                                 |        |
|--------------|------|------|-------|------|--------|-----------------------------------------------------------------------------------------------------------------|--------|
| A_23_P37283  | 1.7  | -1.1 | 2.1   | 5.0  | CGRRF1 | Homo sapiens cell growth regulator with ring finger domain 1 (CGRRF1), mRNA [NM_006568]                         | 10668  |
| A_23_P26976  | -2.1 | 6.6  | 4.5   | 2.1  | CHAD   | Homo sapiens chondroadherin (CHAD), mRNA [NM_001267]                                                            | 1101   |
| A_24_P53519  | 1.0  | 1.0  | -1.0  | -2.3 | CHAF1A | Homo sapiens chromatin assembly factor 1, subunit A (p150) (CHAF1A), mRNA [NM_005483]                           | 10036  |
| A_23_P164559 | -1.4 | -1.4 | -34.7 | -1.4 | CHAMP1 | Homo sapiens chromosome alignment maintaining phosphoprotein 1 (CHAMP1), transcript variant 1, mRNA [NM_032436] | 283489 |

|              |      |      |      |     |        |                                                                                                                                              |       |
|--------------|------|------|------|-----|--------|----------------------------------------------------------------------------------------------------------------------------------------------|-------|
| A_23_P46894  | -2.1 | -2.0 | -3.0 | 1.0 | CHAT   | Homo sapiens choline O-acetyltransferase (CHAT), transcript variant M, mRNA [NM_020549]                                                      | 1103  |
| A_24_P109511 | 3.7  | 1.6  | 3.1  | 1.9 | CHCHD2 | Homo sapiens coiled-coil-helix-coiled-coil-helix domain containing 2 (CHCHD2), nuclear gene encoding mitochondrial protein, mRNA [NM_016139] | 51142 |

|              |     |     |     |     |        |                                                                                                                                              |       |
|--------------|-----|-----|-----|-----|--------|----------------------------------------------------------------------------------------------------------------------------------------------|-------|
| A_23_P157405 | 1.3 | 1.3 | 5.4 | 1.6 | CHCHD2 | Homo sapiens coiled-coil-helix-coiled-coil-helix domain containing 2 (CHCHD2), nuclear gene encoding mitochondrial protein, mRNA [NM_016139] | 51142 |
| A_24_P400376 | 3.0 | 3.8 | 3.6 | 3.8 | CHCHD2 | Homo sapiens coiled-coil-helix-coiled-coil-helix domain containing 2 (CHCHD2), nuclear gene encoding mitochondrial protein, mRNA [NM_016139] | 51142 |

|              |      |      |      |      |        |                                                                                                                          |       |
|--------------|------|------|------|------|--------|--------------------------------------------------------------------------------------------------------------------------|-------|
| A_23_P154282 | 2.8  | 1.9  | 1.5  | 2.3  | CHCHD5 | Homo sapiens coiled-coil-helix-coiled-coil-helix domain containing 5 (CHCHD5), mRNA [NM_032309]                          | 84269 |
| A_23_P91870  | -1.1 | -1.1 | -2.4 | -1.3 | CHCHD6 | Homo sapiens coiled-coil-helix-coiled-coil-helix domain containing 6 (CHCHD6), mRNA [NM_032343]                          | 84303 |
| A_23_P170626 | 1.0  | -1.0 | -1.1 | -3.2 | CHCHD7 | Homo sapiens coiled-coil-helix-coiled-coil-helix domain containing 7 (CHCHD7), transcript variant 1, mRNA [NM_001011667] | 79145 |

|              |      |     |     |     |        |                                                                                                            |       |
|--------------|------|-----|-----|-----|--------|------------------------------------------------------------------------------------------------------------|-------|
| A_23_P13502  | 1.8  | 2.0 | 1.6 | 1.2 | CHCHD8 | Homo sapiens coiled-coil-helix-coiled-coil-helix domain containing 8 (CHCHD8), mRNA [NM_016565]            | 51287 |
| A_24_P85317  | -3.9 | 1.0 | 1.0 | 1.4 | CHD2   | Homo sapiens chromodomain helicase DNA binding protein 2 (CHD2), transcript variant 2, mRNA [NM_001042572] | 1106  |
| A_24_P264664 | 4.8  | 4.6 | 6.0 | 9.8 | CHD2   | Homo sapiens chromodomain helicase DNA binding protein 2 (CHD2), transcript variant 1, mRNA [NM_001271]    | 1106  |

|              |      |      |      |      |      |                                                                                   |       |
|--------------|------|------|------|------|------|-----------------------------------------------------------------------------------|-------|
| A_23_P53541  | 2.1  | 1.6  | 1.3  | 1.5  | CHD4 | Homo sapiens chromodomain helicase DNA binding protein 4 (CHD4), mRNA [NM_001273] | 1108  |
| A_23_P91217  | 1.1  | -6.3 | 1.1  | 1.1  | CHD6 | Homo sapiens chromodomain helicase DNA binding protein 6 (CHD6), mRNA [NM_032221] | 84181 |
| A_32_P150012 | -1.1 | 1.2  | 2.8  | -2.9 | CHD7 | Homo sapiens chromodomain helicase DNA binding protein 7 (CHD7), mRNA [NM_017780] | 55636 |
| A_23_P354929 | 4.0  | 1.5  | 16.5 | 16.4 | CHD9 | Homo sapiens chromodomain helicase DNA binding protein 9 (CHD9), mRNA [NM_025134] | 80205 |



|              |      |      |      |      |      |                                                                                                          |       |
|--------------|------|------|------|------|------|----------------------------------------------------------------------------------------------------------|-------|
| A_24_P942250 | -2.3 | 1.6  | 2.3  | 1.2  | CHD9 | Homo sapiens chromodomain helicase DNA binding protein 9 (CHD9), mRNA [NM_025134]                        | 80205 |
| A_23_P372638 | -2.0 | 1.8  | -4.0 | 1.1  | CHD9 | Homo sapiens chromodomain helicase DNA binding protein 9 (CHD9), mRNA [NM_025134]                        | 80205 |
| A_23_P357185 | -1.1 | -1.8 | 1.2  | -2.7 | CHDH | Homo sapiens choline dehydrogenase (CHDH), nuclear gene encoding mitochondrial protein, mRNA [NM_018397] | 55349 |

|              |      |      |      |      |       |                                                                                                                            |       |
|--------------|------|------|------|------|-------|----------------------------------------------------------------------------------------------------------------------------|-------|
| A_23_P116123 | -3.0 | -1.1 | -6.5 | 1.6  | CHEK1 | Homo sapiens<br>CHK1<br>checkpoint homolog<br>(S. pombe)<br>(CHEK1),<br>transcript<br>variant 3,<br>mRNA<br>[NM_001274]    | 1111  |
| A_23_P109452 | -1.5 | -3.8 | -2.7 | -3.7 | CHEK2 | Homo sapiens<br>CHK2<br>checkpoint homolog<br>(S. pombe)<br>(CHEK2),<br>transcript<br>variant 3,<br>mRNA<br>[NM_001005735] | 11200 |
| A_32_P27046  | 1.4  | -1.1 | 3.4  | -1.4 | CHGA  | Homo sapiens<br>chromogranin A<br>(parathyroid<br>secretory<br>protein 1)<br>(CHGA),<br>mRNA<br>[NM_001275]                | 1113  |
| A_23_P57155  | 2.0  | 2.0  | 1.8  | 1.8  | CHGB  | Homo sapiens<br>chromogranin B<br>(secretogranin 1)<br>(CHGB),<br>mRNA<br>[NM_001819]                                      | 1114  |

|              |       |      |      |      |        |                                                                                            |       |
|--------------|-------|------|------|------|--------|--------------------------------------------------------------------------------------------|-------|
| A_24_P274111 | 1.0   | -1.0 | -5.6 | -1.0 | CHI3L1 | Homo sapiens chitinase 3-like 1 (cartilage glycoprotein-39) (CHI3L1), mRNA [NM_001276]     | 1116  |
| A_23_P34888  | -17.8 | 1.1  | 1.1  | 1.1  | CHIA   | Homo sapiens chitinase, acidic (CHIA), transcript variant 2, mRNA [NM_021797]              | 27159 |
| A_23_P147875 | 2.2   | 1.2  | 3.1  | -1.3 | CHID1  | Homo sapiens chitinase domain containing 1 (CHID1), transcript variant 3, mRNA [NM_023947] | 66005 |
| A_23_P126278 | 1.2   | 1.2  | -2.4 | 1.1  | CHIT1  | Homo sapiens chitinase 1 (chitotriosidase) (CHIT1), mRNA [NM_003465]                       | 1118  |

|              |       |      |      |      |      |                                                                                                           |       |
|--------------|-------|------|------|------|------|-----------------------------------------------------------------------------------------------------------|-------|
| A_23_P136135 | 3.6   | 3.5  | 3.4  | 3.5  | CHKA | Homo sapiens choline kinase alpha (CHKA), transcript variant 1, mRNA [NM_001277]                          | 1119  |
| A_24_P63178  | 1.0   | 1.0  | -3.3 | -1.1 | CHL1 | Homo sapiens cell adhesion molecule with homology to L1CAM (close homolog of L1) (CHL1), mRNA [NM_006614] | 10752 |
| A_23_P22548  | -14.5 | -1.0 | -1.0 | -1.0 | CHM  | Homo sapiens choroideremia (Rab escort protein 1) (CHM), transcript variant 1, mRNA [NM_000390]           | 1121  |

|              |      |      |     |      |        |                                                                                                    |        |
|--------------|------|------|-----|------|--------|----------------------------------------------------------------------------------------------------|--------|
| A_24_P240065 | 2.3  | 1.9  | 2.6 | -3.0 | CHMP3  | Homo sapiens charged multivesicular body protein 3 (CHMP3), transcript variant 1, mRNA [NM_016079] | 51652  |
| A_24_P142024 | 1.2  | 1.3  | 1.0 | 2.1  | CHMP4A | Homo sapiens charged multivesicular body protein 4A (CHMP4A), mRNA [NM_014169]                     | 29082  |
| A_23_P301732 | -2.2 | -1.8 | 1.0 | -1.3 | CHMP4B | Homo sapiens charged multivesicular body protein 4B (CHMP4B), mRNA [NM_176812]                     | 128866 |
| A_23_P303203 | 2.8  | 2.2  | 1.6 | 1.2  | CHMP7  | Homo sapiens charged multivesicular body protein 7 (CHMP7), mRNA [NM_152272]                       | 91782  |

|              |      |      |      |      |       |                                                                                             |        |
|--------------|------|------|------|------|-------|---------------------------------------------------------------------------------------------|--------|
| A_23_P68669  | 1.3  | -1.5 | 1.7  | -2.7 | CHODL | Homo sapiens chondrolectin (CHODL), transcript variant 1, mRNA [NM_024944]                  | 140578 |
| A_23_P100111 | -1.3 | 1.0  | 2.2  | 1.8  | CHP   | Homo sapiens calcium binding protein P22 (CHP), mRNA [NM_007236]                            | 11261  |
| A_23_P131289 | 1.0  | 1.6  | -4.2 | 1.1  | CHPF  | Homo sapiens chondroitin polymerizing factor (CHPF), transcript variant 1, mRNA [NM_024536] | 79586  |
| A_23_P397055 | -4.8 | 1.2  | 1.0  | 2.5  | CHPF2 | Homo sapiens chondroitin polymerizing factor 2 (CHPF2), mRNA [NM_019015]                    | 54480  |

|              |      |      |      |      |        |                                                                                                 |       |
|--------------|------|------|------|------|--------|-------------------------------------------------------------------------------------------------|-------|
| A_32_P54442  | -1.9 | 3.9  | -1.3 | -1.3 | CHPF2  | Homo sapiens chondroitin polymerizing factor 2 (CHPF2), mRNA [NM_019015]                        | 54480 |
| A_23_P123544 | -1.0 | 1.3  | 2.4  | 1.1  | CHRAC1 | Homo sapiens chromatin accessibility complex 1 (CHRAC1), transcript variant 1, mRNA [NM_017444] | 54108 |
| A_24_P117725 | 1.7  | -2.7 | 1.6  | -1.3 | CHRD   | Homo sapiens chordin (CHRD), mRNA [NM_003741]                                                   | 8646  |
| A_23_P502047 | -1.7 | -1.9 | -2.4 | -1.7 | CHRD   | Homo sapiens chordin (CHRD), mRNA [NM_003741]                                                   | 8646  |

|              |      |      |      |     |        |                                                                                                    |      |
|--------------|------|------|------|-----|--------|----------------------------------------------------------------------------------------------------|------|
| A_24_P911939 | 2.4  | 1.4  | 2.3  | 1.1 | CHRM2  | Homo sapiens cholinergic receptor, muscarinic 2 (CHRM2), transcript variant 2, mRNA [NM_001006627] | 1129 |
| A_23_P401472 | 1.6  | 2.6  | 1.1  | 1.8 | CHRM3  | Homo sapiens cholinergic receptor, muscarinic 3 (CHRM3), mRNA [NM_000740]                          | 1131 |
| A_23_P210395 | -1.3 | 1.6  | 2.1  | 1.1 | CHRNA4 | Homo sapiens cholinergic receptor, nicotinic, alpha 4 (CHRNA4), mRNA [NM_000744]                   | 1137 |
| A_24_P912720 | 1.1  | -1.3 | -2.6 | 1.2 | CHRNA4 | H.sapiens mRNA for neuronal acetylcholine receptor alpha-4 subunit, exon 1. [X89741]               | 1137 |



|              |       |      |      |      |        |                                                                                                           |      |
|--------------|-------|------|------|------|--------|-----------------------------------------------------------------------------------------------------------|------|
| A_32_P35969  | 1.0   | -1.2 | -4.4 | -1.0 | CHRNA7 | Homo sapiens cholinergic receptor, nicotinic, alpha 7 (CHRNA7), transcript variant 2, mRNA [NM_001190455] | 1139 |
| A_24_P27627  | -11.3 | -1.2 | 1.0  | -2.1 | CHRNA1 | Homo sapiens cholinergic receptor, nicotinic, beta 1 (muscle) (CHRNA1), mRNA [NM_000747]                  | 1140 |
| A_23_P207106 | -1.0  | -1.0 | -3.2 | -1.0 | CHRNA1 | Homo sapiens cholinergic receptor, nicotinic, beta 1 (muscle) (CHRNA1), mRNA [NM_000747]                  | 1140 |

|              |      |     |      |      |        |                                                                                                                |       |
|--------------|------|-----|------|------|--------|----------------------------------------------------------------------------------------------------------------|-------|
| A_23_P123424 | 2.1  | 2.0 | 1.9  | 1.9  | CHRN3  | Homo sapiens cholinergic receptor, nicotinic, beta 3 (CHRN3), mRNA [NM_000749]                                 | 1142  |
| A_23_P304279 | -1.3 | 2.6 | 2.9  | 2.0  | CHRNE  | Homo sapiens cholinergic receptor, nicotinic, epsilon (CHRNE), mRNA [NM_000080]                                | 1145  |
| A_23_P102351 | 1.6  | 1.6 | -2.4 | 1.0  | CHST10 | Homo sapiens carbohydrate sulfotransferase 10 (CHST10), mRNA [NM_004854]                                       | 9486  |
| A_23_P139919 | -3.9 | 1.1 | 1.1  | -3.2 | CHST11 | Homo sapiens carbohydrate (chondroitin 4) sulfotransferase 11 (CHST11), transcript variant 1, mRNA [NM_018413] | 50515 |

|              |      |      |      |      |        |                                                                                                                |        |
|--------------|------|------|------|------|--------|----------------------------------------------------------------------------------------------------------------|--------|
| A_32_P99171  | 1.7  | 2.3  | -1.4 | 1.3  | CHST11 | Homo sapiens carbohydrate (chondroitin 4) sulfotransferase 11 (CHST11), transcript variant 1, mRNA [NM_018413] | 50515  |
| A_23_P80473  | -2.5 | -1.3 | -2.0 | -1.4 | CHST13 | Homo sapiens carbohydrate (chondroitin 4) sulfotransferase 13 (CHST13), mRNA [NM_152889]                       | 166012 |
| A_24_P210637 | 9.2  | 1.8  | 2.7  | 8.7  | CHST14 | Homo sapiens carbohydrate (N-acetylgalactosamine 4-O) sulfotransferase 14 (CHST14), mRNA [NM_130468]           | 113189 |

|              |      |      |      |      |       |                                                                                                                        |       |
|--------------|------|------|------|------|-------|------------------------------------------------------------------------------------------------------------------------|-------|
| A_23_P141035 | -2.1 | -2.0 | -1.0 | 1.7  | CHST4 | Homo sapiens carbohydrate (N-acetylglucosamine 6-O) sulfotransferase 4 (CHST4), transcript variant 1, mRNA [NM_005769] | 10164 |
| A_23_P106922 | -1.0 | 1.2  | -3.8 | -1.0 | CHST6 | Homo sapiens carbohydrate (N-acetylglucosamine 6-O) sulfotransferase 6 (CHST6), mRNA [NM_021615]                       | 4166  |
| A_23_P319617 | -9.1 | -1.0 | -1.1 | 1.0  | CHST7 | Homo sapiens carbohydrate (N-acetylglucosamine 6-O) sulfotransferase 7 (CHST7), mRNA [NM_019886]                       | 56548 |

|              |      |      |      |      |           |                                                                                                                   |        |
|--------------|------|------|------|------|-----------|-------------------------------------------------------------------------------------------------------------------|--------|
| A_23_P435649 | -7.4 | 1.0  | 1.0  | 1.1  | CHST9-AS1 | Homo sapiens CHST9 antisense RNA 1 (non-protein coding) (CHST9-AS1), non-coding RNA [NR_026908]                   | 147429 |
| A_32_P44274  | 1.2  | -1.4 | 1.4  | -2.6 | CHTF18    | Homo sapiens CTF18, chromosome transmission fidelity factor 18 homolog (S. cerevisiae) (CHTF18), mRNA [NM_022092] | 63922  |
| A_23_P354297 | -2.2 | -2.1 | -3.1 | -3.6 | CHTF18    | Homo sapiens CTF18, chromosome transmission fidelity factor 18 homolog (S. cerevisiae) (CHTF18), mRNA [NM_022092] | 63922  |

|              |      |      |      |      |       |                                                                                           |       |
|--------------|------|------|------|------|-------|-------------------------------------------------------------------------------------------|-------|
| A_23_P201726 | -1.2 | -2.2 | -1.2 | -1.2 | CHTOP | Homo sapiens chromatin target of PRMT1 (CHTOP), transcript variant 2, mRNA [NM_001206612] | 26097 |
| A_23_P77360  | 1.6  | 2.0  | 3.2  | 2.8  | CIAO1 | Homo sapiens cytosolic iron-sulfur protein assembly 1 (CIAO1), mRNA [NM_004804]           | 9391  |
| A_23_P410059 | -3.9 | -3.2 | -5.5 | -2.0 | CIAO1 | Homo sapiens cytosolic iron-sulfur protein assembly 1 (CIAO1), mRNA [NM_004804]           | 9391  |
| A_23_P257638 | 1.8  | 1.5  | 1.1  | 2.5  | CIB1  | Homo sapiens calcium and integrin binding 1 (calmyrin) (CIB1), mRNA [NM_006384]           | 10519 |

|              |      |      |      |      |       |                                                                                    |        |
|--------------|------|------|------|------|-------|------------------------------------------------------------------------------------|--------|
| A_23_P65890  | 1.8  | 3.9  | 3.9  | 1.5  | CIB2  | Homo sapiens calcium and integrin binding family member 2 (CIB2), mRNA [NM_006383] | 10518  |
| A_23_P130585 | 1.2  | 1.3  | -2.3 | -1.5 | CIB3  | Homo sapiens calcium and integrin binding family member 3 (CIB3), mRNA [NM_054113] | 117286 |
| A_23_P55731  | 1.6  | 2.4  | 2.0  | 1.8  | CIC   | Homo sapiens capicua homolog (Drosophila) (CIC), mRNA [NM_015125]                  | 23152  |
| A_23_P37359  | -1.3 | -1.3 | -2.0 | -1.4 | CIDEB | Homo sapiens cell death-inducing DFFA-like effector b (CIDEB), mRNA [NM_014430]    | 27141  |

|              |      |      |      |      |       |                                                                                                       |        |
|--------------|------|------|------|------|-------|-------------------------------------------------------------------------------------------------------|--------|
| A_23_P92025  | -1.4 | -1.5 | -1.1 | -2.1 | CIDEC | Homo sapiens cell death-inducing DFFA-like effector c (CIDEC), transcript variant 3, mRNA [NM_022094] | 63924  |
| A_23_P33384  | 1.1  | 2.2  | 1.0  | -1.0 | CIITA | Homo sapiens class II, major histocompatibility complex, transactivator (CIITA), mRNA [NM_000246]     | 4261   |
| A_23_P377318 | 2.3  | 2.0  | 1.5  | 2.0  | CILP2 | Homo sapiens cartilage intermediate layer protein 2 (CILP2), mRNA [NM_153221]                         | 148113 |
| A_23_P39814  | -1.7 | -1.1 | -2.2 | -1.2 | CIR1  | Homo sapiens corepressor interacting with RBPJ, 1 (CIR1), mRNA [NM_004882]                            | 9541   |



|              |     |      |      |      |       |                                                                                                           |        |
|--------------|-----|------|------|------|-------|-----------------------------------------------------------------------------------------------------------|--------|
| A_23_P413456 | 1.2 | 1.7  | 2.6  | 1.3  | CIRBP | Homo sapiens cold inducible RNA binding protein (CIRBP), transcript variant 2, non-coding RNA [NR_023312] | 1153   |
| A_23_P35467  | 1.0 | -2.4 | 1.7  | 1.2  | CISD1 | Homo sapiens CDGSH iron sulfur domain 1 (CISD1), mRNA [NM_018464]                                         | 55847  |
| A_32_P162357 | 1.5 | 1.5  | -2.4 | 1.1  | CISD2 | Homo sapiens CDGSH iron sulfur domain 2 (CISD2), mRNA [NM_001008388]                                      | 493856 |
| A_24_P97465  | 1.5 | -1.4 | -1.5 | -3.5 | CISH  | Homo sapiens cytokine inducible SH2-containing protein (CISH), transcript variant 2, mRNA [NM_145071]     | 1154   |

|              |      |      |      |      |        |                                                                                                                           |        |
|--------------|------|------|------|------|--------|---------------------------------------------------------------------------------------------------------------------------|--------|
| A_23_P144096 | 2.5  | 11.1 | 5.3  | 9.0  | CISH   | Homo sapiens cytokine inducible SH2-containing protein (CISH), transcript variant 2, mRNA [NM_145071]                     | 1154   |
| A_32_P209230 | -1.2 | 1.4  | -1.3 | -2.4 | CITED4 | Homo sapiens Cbp/p300-interacting transactivator, with Glu/Asp-rich carboxy-terminal domain, 4 (CITED4), mRNA [NM_133467] | 163732 |
| A_23_P32229  | -1.5 | 2.5  | -2.0 | -1.3 | CIZ1   | Homo sapiens CDKN1A interacting zinc finger protein 1 (CIZ1), transcript variant 1, mRNA [NM_012127]                      | 25792  |

|              |      |      |      |      |            |                                                                                             |           |
|--------------|------|------|------|------|------------|---------------------------------------------------------------------------------------------|-----------|
| A_23_P388812 | -1.0 | -1.0 | 1.4  | -7.2 | CKAP2L     | Homo sapiens cytoskeleton associated protein 2-like (CKAP2L), mRNA [NM_152515]              | 150468    |
| A_24_P61537  | -1.6 | 2.2  | -1.1 | 1.3  | CKB        | Homo sapiens creatine kinase, brain (CKB), mRNA [NM_001823]                                 | 1152      |
| A_24_P215804 | -4.1 | -1.2 | -1.0 | -1.7 | CKLF       | Homo sapiens chemokine-like factor (CKLF), transcript variant 1, mRNA [NM_016951]           | 51192     |
| A_23_P106663 | 10.9 | 8.8  | 8.8  | 8.9  | CKLF-CMTM1 | Homo sapiens CKLF-CMTM1 readthrough (CKLF-CMTM1), transcript variant 1, mRNA [NM_001204099] | 100529251 |

|              |      |      |      |      |        |                                                                                                       |       |
|--------------|------|------|------|------|--------|-------------------------------------------------------------------------------------------------------|-------|
| A_23_P71727  | -1.1 | -3.5 | -1.2 | -1.2 | CKS2   | Homo sapiens CDC28 protein kinase regulatory subunit 2 (CKS2), mRNA [NM_001827]                       | 1164  |
| A_23_P311232 | 6.8  | 8.4  | 2.6  | 6.4  | CLASP1 | Homo sapiens cytoplasmic linker associated protein 1 (CLASP1), transcript variant 1, mRNA [NM_015282] | 23332 |
| A_24_P127748 | -4.1 | -1.0 | -2.1 | -1.6 | CLASP2 | Homo sapiens cytoplasmic linker associated protein 2 (CLASP2), transcript variant 1, mRNA [NM_015097] | 23122 |

|             |      |      |      |      |        |                                                                                                       |       |
|-------------|------|------|------|------|--------|-------------------------------------------------------------------------------------------------------|-------|
| A_23_P44295 | 1.8  | 2.4  | 2.0  | 2.2  | CLASP2 | Homo sapiens cytoplasmic linker associated protein 2 (CLASP2), transcript variant 1, mRNA [NM_015097] | 23122 |
| A_23_P78517 | -2.2 | -1.4 | -1.1 | -1.0 | CLASRP | Homo sapiens CLK4-associating serine/arginine rich protein (CLASRP), mRNA [NM_007056]                 | 11129 |
| A_23_P51217 | 1.0  | -1.0 | -2.4 | -1.1 | CLCA1  | Homo sapiens chloride channel accessory 1 (CLCA1), mRNA [NM_001285]                                   | 1179  |
| A_23_P45751 | 1.0  | -1.0 | -2.7 | -1.1 | CLCA4  | Homo sapiens chloride channel accessory 4 (CLCA4), transcript variant 1, mRNA [NM_012128]             | 22802 |

|              |     |       |     |      |       |                                                                                      |      |
|--------------|-----|-------|-----|------|-------|--------------------------------------------------------------------------------------|------|
| A_24_P402847 | 1.1 | -43.5 | 1.0 | -1.0 | CLCN3 | Homo sapiens chloride channel 3 (CLCN3), transcript variant b, mRNA [NM_001829]      | 1182 |
| A_23_P124476 | 3.2 | 3.3   | 4.0 | -1.1 | CLCN3 | Homo sapiens chloride channel 3 (CLCN3), transcript variant e, mRNA [NM_173872]      | 1182 |
| A_23_P369210 | 1.9 | 2.2   | 1.9 | 1.1  | CLCN5 | chloride channel 5 [Source:HGNC Symbol;Acc:2023] [ENST00000376108]                   | 1184 |
| A_23_P200361 | 1.1 | 1.6   | 1.5 | -4.8 | CLCN6 | Homo sapiens chloride channel 6 (CLCN6), transcript variant CIC-6a, mRNA [NM_001286] | 1185 |

|              |     |      |      |      |        |                                                                                   |      |
|--------------|-----|------|------|------|--------|-----------------------------------------------------------------------------------|------|
| A_24_P2361   | 1.6 | 1.5  | 2.6  | 2.7  | CLCNKA | Homo sapiens chloride channel Ka (CLCNKA), transcript variant 1, mRNA [NM_004070] | 1187 |
| A_23_P405088 | 1.2 | 3.8  | 1.3  | -1.8 | CLDN11 | Homo sapiens claudin 11 (CLDN11), transcript variant 1, mRNA [NM_005602]          | 5010 |
| A_32_P23272  | 1.9 | 1.9  | 1.9  | 2.0  | CLDN11 | Homo sapiens full length insert cDNA clone YO11A01. [AF085871]                    | 5010 |
| A_23_P29800  | 1.3 | -1.2 | -1.6 | 2.3  | CLDN11 | Homo sapiens claudin 11 (CLDN11), transcript variant 1, mRNA [NM_005602]          | 5010 |
| A_23_P157268 | 1.2 | -1.0 | -1.0 | -2.0 | CLDN12 | Homo sapiens claudin 12 (CLDN12), transcript variant 3, mRNA [NM_012129]          | 9069 |

|              |      |      |      |      |        |                                                                          |        |
|--------------|------|------|------|------|--------|--------------------------------------------------------------------------|--------|
| A_23_P500886 | 2.0  | 2.0  | 3.9  | 3.5  | CLDN15 | Homo sapiens claudin 15 (CLDN15), transcript variant 2, mRNA [NM_014343] | 24146  |
| A_23_P379054 | 1.1  | 1.1  | -2.0 | -1.0 | CLDN19 | Homo sapiens claudin 19 (CLDN19), transcript variant 1, mRNA [NM_148960] | 149461 |
| A_23_P394947 | 1.5  | 3.6  | 1.5  | 1.9  | CLDN2  | Homo sapiens claudin 2 (CLDN2), transcript variant 1, mRNA [NM_020384]   | 9075   |
| A_23_P134854 | 17.6 | 3.8  | 4.7  | 4.8  | CLDN23 | Homo sapiens claudin 23 (CLDN23), mRNA [NM_194284]                       | 137075 |
| A_24_P115183 | -2.6 | -1.1 | -2.2 | -2.2 | CLDN4  | Homo sapiens claudin 4 (CLDN4), mRNA [NM_001305]                         | 1364   |



|              |     |     |      |      |         |                                                                                                         |       |
|--------------|-----|-----|------|------|---------|---------------------------------------------------------------------------------------------------------|-------|
| A_24_P79300  | 4.9 | 2.8 | 6.3  | 4.0  | CLDN5   | Homo sapiens claudin 5 (CLDN5), transcript variant 2, mRNA [NM_003277]                                  | 7122  |
| A_23_P37942  | 3.0 | 2.1 | 3.1  | 1.1  | CLDN6   | Homo sapiens claudin 6 (CLDN6), mRNA [NM_021195]                                                        | 9074  |
| A_23_P141505 | 1.1 | 1.0 | 2.2  | 1.0  | CLEC10A | Homo sapiens C-type lectin domain family 10, member A (CLEC10A), transcript variant 1, mRNA [NM_182906] | 10462 |
| A_23_P141508 | 2.0 | 1.6 | -2.2 | -1.9 | CLEC10A | Homo sapiens C-type lectin domain family 10, member A (CLEC10A), transcript variant 2, mRNA [NM_006344] | 10462 |

|              |      |      |      |      |         |                                                                                                            |        |
|--------------|------|------|------|------|---------|------------------------------------------------------------------------------------------------------------|--------|
| A_23_P204671 | -1.3 | -1.3 | -3.1 | -1.3 | CLEC12B | Homo sapiens C-type lectin domain family 12, member B (CLEC12B), transcript variant 1, mRNA [NM_001129998] | 387837 |
| A_24_P215653 | 1.1  | -1.0 | 1.3  | -2.0 | CLEC14A | Homo sapiens C-type lectin domain family 14, member A (CLEC14A), mRNA [NM_175060]                          | 161198 |
| A_23_P206501 | 1.3  | 1.1  | 1.1  | -2.0 | CLEC18B | Homo sapiens C-type lectin domain family 18, member B (CLEC18B), mRNA [NM_001011880]                       | 497190 |
| A_24_P201702 | 1.0  | -2.5 | -5.0 | -3.0 | CLEC2B  | Homo sapiens C-type lectin domain family 2, member B (CLEC2B), mRNA [NM_005127]                            | 9976   |

|              |      |      |      |      |        |                                                                                                          |       |
|--------------|------|------|------|------|--------|----------------------------------------------------------------------------------------------------------|-------|
| A_32_P95960  | -1.3 | -4.2 | -1.7 | -1.4 | CLEC2D | Homo sapiens C-type lectin domain family 2, member D (CLEC2D), transcript variant 2, mRNA [NM_001004419] | 29121 |
| A_24_P364335 | -3.4 | 1.3  | 1.1  | -9.1 | CLEC2D | Homo sapiens C-type lectin domain family 2, member D (CLEC2D), transcript variant 2, mRNA [NM_001004419] | 29121 |
| A_32_P80068  | 1.0  | -1.8 | -1.0 | -2.1 | CLEC2D | Homo sapiens C-type lectin domain family 2, member D (CLEC2D), transcript variant 2, mRNA [NM_001004419] | 29121 |

|              |      |      |      |      |        |                                                                                                          |        |
|--------------|------|------|------|------|--------|----------------------------------------------------------------------------------------------------------|--------|
| A_24_P241183 | -1.0 | -1.0 | -1.1 | 2.6  | CLEC2D | Homo sapiens C-type lectin domain family 2, member D (CLEC2D), transcript variant 1, mRNA [NM_013269]    | 29121  |
| A_23_P380990 | -1.1 | 1.7  | -3.0 | -1.5 | CLEC4F | Homo sapiens C-type lectin domain family 4, member F (CLEC4F), mRNA [NM_173535]                          | 165530 |
| A_23_P208482 | -1.2 | 1.2  | 1.0  | -2.1 | CLEC4M | Homo sapiens C-type lectin domain family 4, member M (CLEC4M), transcript variant 2, mRNA [NM_001144904] | 10332  |

|              |      |      |      |      |        |                                                                                                       |       |
|--------------|------|------|------|------|--------|-------------------------------------------------------------------------------------------------------|-------|
| A_24_P227415 | -1.0 | -4.0 | -1.5 | -2.7 | CLEC7A | Homo sapiens C-type lectin domain family 7, member A (CLEC7A), transcript variant 6, mRNA [NM_197954] | 64581 |
| A_23_P18684  | 1.1  | 1.0  | -2.5 | -3.3 | CLGN   | Homo sapiens calmeglin (CLGN), transcript variant 1, mRNA [NM_004362]                                 | 1047  |
| A_23_P30884  | 1.6  | -1.9 | -1.4 | 2.3  | CLIC1  | Homo sapiens chloride intracellular channel 1 (CLIC1), mRNA [NM_001288]                               | 1192  |
| A_23_P45456  | -3.5 | 1.3  | 1.3  | 1.0  | CLIC2  | Homo sapiens chloride intracellular channel 2 (CLIC2), mRNA [NM_001289]                               | 1193  |

|              |      |      |      |     |       |                                                                                                                                            |       |
|--------------|------|------|------|-----|-------|--------------------------------------------------------------------------------------------------------------------------------------------|-------|
| A_23_P259189 | -3.6 | -4.1 | 1.1  | 1.1 | CLIC4 | Homo sapiens chloride intracellular channel 4 (CLIC4), nuclear gene encoding mitochondrial protein, mRNA [NM_013943]                       | 25932 |
| A_23_P416774 | -1.1 | -5.2 | -1.0 | 1.1 | CLIC5 | Homo sapiens chloride intracellular channel 5 (CLIC5), nuclear gene encoding mitochondrial protein, transcript variant 2, mRNA [NM_016929] | 53405 |
| A_23_P25003  | -5.4 | -1.7 | -1.2 | 1.0 | CLIP1 | Homo sapiens CAP-GLY domain containing linker protein 1 (CLIP1), transcript variant 1, mRNA [NM_002956]                                    | 6249  |

|              |      |      |       |      |       |                                                                                                         |       |
|--------------|------|------|-------|------|-------|---------------------------------------------------------------------------------------------------------|-------|
| A_24_P279718 | -3.8 | -1.9 | -2.5  | -2.9 | CLIP3 | Homo sapiens CAP-GLY domain containing linker protein 3 (CLIP3), transcript variant 2, mRNA [NM_015526] | 25999 |
| A_23_P50786  | -1.0 | -4.3 | -2.1  | -1.5 | CLIP3 | Homo sapiens CAP-GLY domain containing linker protein 3 (CLIP3), transcript variant 2, mRNA [NM_015526] | 25999 |
| A_23_P209232 | 1.0  | -1.0 | -11.6 | -1.1 | CLIP4 | Homo sapiens CAP-GLY domain containing linker protein family, member 4 (CLIP4), mRNA [NM_024692]        | 79745 |

|              |     |     |     |      |       |                                                                                                            |       |
|--------------|-----|-----|-----|------|-------|------------------------------------------------------------------------------------------------------------|-------|
| A_23_P417363 | 2.5 | 2.3 | 2.2 | 2.7  | CLIP4 | CAP-GLY domain containing linker protein family, member 4 [Source:HGNC Symbol;Acc:26108] [ENST00000415891] | 79745 |
| A_23_P16817  | 1.2 | 2.3 | 1.9 | 1.8  | CLK1  | Homo sapiens CDC-like kinase 1 (CLK1), transcript variant 1, mRNA [NM_004071]                              | 1195  |
| A_24_P257151 | 1.0 | 1.2 | 1.2 | -3.9 | CLK1  | Homo sapiens CDC-like kinase 1 (CLK1), transcript variant 1, mRNA [NM_004071]                              | 1195  |
| A_23_P85888  | 1.2 | 2.2 | 1.5 | 2.6  | CLK2  | Homo sapiens CDC-like kinase 2 (CLK2), mRNA [NM_003993]                                                    | 1196  |



|             |      |      |      |      |      |                                                                               |       |
|-------------|------|------|------|------|------|-------------------------------------------------------------------------------|-------|
| A_24_P67027 | -1.3 | 4.4  | 1.2  | -1.7 | CLK2 | Homo sapiens CDC-like kinase 2 (CLK2), mRNA [NM_003993]                       | 1196  |
| A_23_P99974 | -1.8 | -2.1 | -2.4 | -1.1 | CLK3 | Homo sapiens CDC-like kinase 3 (CLK3), transcript variant 2, mRNA [NM_003992] | 1198  |
| A_32_P20691 | 1.0  | -1.4 | -1.0 | -3.0 | CLK3 | Homo sapiens CDC-like kinase 3 (CLK3), transcript variant 2, mRNA [NM_003992] | 1198  |
| A_23_P61674 | 2.6  | 4.5  | 1.3  | 2.5  | CLK4 | Homo sapiens CDC-like kinase 4 (CLK4), mRNA [NM_020666]                       | 57396 |
| A_23_P35995 | -1.3 | -1.4 | -1.2 | -4.7 | CLMP | Homo sapiens CXADR-like membrane protein (CLMP), mRNA [NM_024769]             | 79827 |

|              |       |      |      |      |      |                                                                                                  |      |
|--------------|-------|------|------|------|------|--------------------------------------------------------------------------------------------------|------|
| A_23_P88971  | -2.8  | -1.8 | -4.3 | -4.1 | CLN3 | Homo sapiens ceroid-lipofuscinosis, neuronal 3 (CLN3), transcript variant 1, mRNA [NM_001042432] | 1201 |
| A_24_P296424 | -14.6 | -2.3 | -2.6 | -2.7 | CLN3 | Homo sapiens ceroid-lipofuscinosis, neuronal 3 (CLN3), transcript variant 1, mRNA [NM_001042432] | 1201 |
| A_24_P179071 | -3.1  | 1.7  | 1.1  | 1.8  | CLN3 | Homo sapiens ceroid-lipofuscinosis, neuronal 3 (CLN3), transcript variant 1, mRNA [NM_001042432] | 1201 |

|              |      |      |      |      |        |                                                                                                                                             |       |
|--------------|------|------|------|------|--------|---------------------------------------------------------------------------------------------------------------------------------------------|-------|
| A_24_P914649 | 1.6  | -2.2 | -3.0 | -1.5 | CLNS1A | chloride channel, nucleotide-sensitive, 1A<br>[Source:HGNC Symbol;Acc:2080]<br>[ENST00000533957]                                            | 1207  |
| A_23_P419038 | 1.1  | 1.1  | -7.5 | 1.0  | CLOCK  | Homo sapiens clock homolog (mouse) (CLOCK), mRNA<br>[NM_004898]                                                                             | 9575  |
| A_23_P87141  | -5.4 | -1.0 | -1.0 | -1.0 | CLP1   | Homo sapiens CLP1, cleavage and polyadenylation factor I subunit, homolog (S. cerevisiae) (CLP1), transcript variant 1, mRNA<br>[NM_006831] | 10978 |

|              |      |      |      |       |      |                                                                                                                                          |       |
|--------------|------|------|------|-------|------|------------------------------------------------------------------------------------------------------------------------------------------|-------|
| A_24_P252973 | -1.1 | -1.1 | -1.2 | -53.5 | CLP1 | Homo sapiens CLP1, cleavage and polyadenylation factor I subunit, homolog (S. cerevisiae) (CLP1), transcript variant 1, mRNA [NM_006831] | 10978 |
| A_23_P75978  | 1.1  | -3.5 | -1.6 | 1.0   | CLPB | Homo sapiens ClpB caseinolytic peptidase B homolog (E. coli) (CLPB), mRNA [NM_030813]                                                    | 81570 |

|              |      |      |      |      |        |                                                                                                                                                                      |       |
|--------------|------|------|------|------|--------|----------------------------------------------------------------------------------------------------------------------------------------------------------------------|-------|
| A_23_P4754   | 2.1  | 1.7  | 2.4  | 1.3  | CLPP   | Homo sapiens ClpP caseinolytic peptidase, ATP-dependent, proteolytic subunit homolog (E. coli) (CLPP), nuclear gene encoding mitochondrial protein, mRNA [NM_006012] | 8192  |
| A_23_P8142   | -1.0 | -1.4 | -2.4 | -3.4 | CLPS   | Homo sapiens colipase, pancreatic (CLPS), mRNA [NM_001832]                                                                                                           | 1208  |
| A_24_P191067 | 1.0  | 1.0  | 1.0  | -2.0 | CLSTN1 | Homo sapiens calsyntenin 1 (CLSTN1), transcript variant 1, mRNA [NM_001009566]                                                                                       | 22883 |

|              |      |      |      |      |        |                                                                                              |       |
|--------------|------|------|------|------|--------|----------------------------------------------------------------------------------------------|-------|
| A_23_P252671 | -8.2 | 1.1  | -1.3 | -1.3 | CLTB   | Homo sapiens clathrin, light chain B (CLTB), transcript variant 2, mRNA [NM_007097]          | 1212  |
| A_23_P143559 | -4.1 | -1.5 | 1.2  | 2.1  | CLTCL1 | Homo sapiens clathrin, heavy chain-like 1 (CLTCL1), transcript variant 1, mRNA [NM_007098]   | 8218  |
| A_23_P77714  | 1.4  | 1.0  | -4.6 | 1.1  | CLUAP1 | Homo sapiens clusterin associated protein 1 (CLUAP1), transcript variant 2, mRNA [NM_024793] | 23059 |
| A_23_P55572  | 1.1  | -5.7 | 1.0  | 1.1  | CLUL1  | Homo sapiens clusterin-like 1 (retinal) (CLUL1), transcript variant 1, mRNA [NM_014410]      | 27098 |

|              |      |     |     |     |       |                                                                                                 |        |
|--------------|------|-----|-----|-----|-------|-------------------------------------------------------------------------------------------------|--------|
| A_24_P23482  | 2.4  | 3.1 | 2.3 | 2.1 | CLYBL | Homo sapiens cDNA FLJ38187 fis, clone FCBBF100 0182. [AK095506]                                 | 171425 |
| A_23_P151778 | 1.2  | 3.7 | 4.0 | 1.1 | CMA1  | Homo sapiens chymase 1, mast cell (CMA1), mRNA [NM_001836]                                      | 1215   |
| A_32_P73045  | -3.9 | 1.0 | 1.0 | 1.0 | CMAS  | Homo sapiens cytidine monophosphate N-acetylneuraminic acid synthetase (CMAS), mRNA [NM_018686] | 55907  |

|              |      |     |      |      |        |                                                                                                                                               |        |
|--------------|------|-----|------|------|--------|-----------------------------------------------------------------------------------------------------------------------------------------------|--------|
| A_24_P408740 | 1.1  | 1.1 | -1.6 | -6.6 | CMC1   | Homo sapiens COX assembly mitochondrial protein homolog (S. cerevisiae) (CMC1), nuclear gene encoding mitochondrial protein, mRNA [NM_182523] | 152100 |
| A_23_P105465 | -2.3 | 1.8 | -1.2 | -1.1 | CMKLR1 | Homo sapiens chemokine-like receptor 1 (CMKLR1), transcript variant 2, mRNA [NM_004072]                                                       | 1240   |
| A_23_P105461 | 1.1  | 2.0 | 1.2  | 1.0  | CMKLR1 | Homo sapiens chemokine-like receptor 1 (CMKLR1), transcript variant 2, mRNA [NM_004072]                                                       | 1240   |



|              |      |      |      |      |        |                                                                                                                 |        |
|--------------|------|------|------|------|--------|-----------------------------------------------------------------------------------------------------------------|--------|
| A_24_P766716 | -4.5 | 1.0  | 1.0  | -2.0 | CMKLR1 | Homo sapiens chemokine-like receptor 1 (CMKLR1), transcript variant 1, mRNA [NM_001142343]                      | 1240   |
| A_24_P39508  | 2.4  | 2.7  | 2.4  | 2.3  | CMTM3  | Homo sapiens CKLF-like MARVEL transmembrane domain containing 3 (CMTM3), transcript variant 1, mRNA [NM_144601] | 123920 |
| A_23_P391980 | -1.2 | -2.3 | -1.3 | -1.5 | CMTM4  | Homo sapiens CKLF-like MARVEL transmembrane domain containing 4 (CMTM4), transcript variant 1, mRNA [NM_178818] | 146223 |

|              |      |      |      |      |       |                                                                                                                 |        |
|--------------|------|------|------|------|-------|-----------------------------------------------------------------------------------------------------------------|--------|
| A_23_P256413 | 1.0  | -4.9 | 1.3  | -1.0 | CMTM7 | Homo sapiens CKLF-like MARVEL transmembrane domain containing 7 (CMTM7), transcript variant 1, mRNA [NM_138410] | 112616 |
| A_24_P937546 | 2.8  | 3.4  | 2.8  | 2.6  | CMTM7 | Homo sapiens mRNA; cDNA DKFZp434I2129 (from clone DKFZp434I2129). [AL832450]                                    | 112616 |
| A_23_P40880  | -8.2 | -1.0 | -1.1 | -1.0 | CMTM8 | Homo sapiens CKLF-like MARVEL transmembrane domain containing 8 (CMTM8), mRNA [NM_178868]                       | 152189 |

|              |     |     |     |     |       |                                                                                                               |       |
|--------------|-----|-----|-----|-----|-------|---------------------------------------------------------------------------------------------------------------|-------|
| A_24_P151084 | 2.5 | 2.9 | 4.0 | 2.9 | CNDP2 | Homo sapiens CNDP dipeptidase 2 (metallopeptidase M20 family) (CNDP2), transcript variant 1, mRNA [NM_018235] | 55748 |
| A_23_P27473  | 2.9 | 1.5 | 1.5 | 1.4 | CNFN  | Homo sapiens cornifelin (CNFN), mRNA [NM_032488]                                                              | 84518 |
| A_24_P256722 | 2.7 | 2.7 | 1.6 | 2.5 | CNGA1 | Homo sapiens cyclic nucleotide gated channel alpha 1 (CNGA1), transcript variant 2, mRNA [NM_000087]          | 1259  |
| A_23_P2006   | 1.4 | 2.1 | 1.4 | 1.4 | CNGA4 | Homo sapiens cyclic nucleotide gated channel alpha 4 (CNGA4), mRNA [NM_001037329]                             | 1262  |

|              |      |      |      |      |        |                                                                                                                |        |
|--------------|------|------|------|------|--------|----------------------------------------------------------------------------------------------------------------|--------|
| A_24_P229588 | 1.6  | -2.3 | 1.3  | -4.7 | CNGB1  | Homo sapiens cyclic nucleotide gated channel beta 1 (CNGB1), transcript variant 1, mRNA [NM_001297]            | 1258   |
| A_24_P203315 | -1.9 | -2.2 | -3.1 | -1.8 | CNIH2  | Homo sapiens cornichon homolog 2 (Drosophila) (CNIH2), mRNA [NM_182553]                                        | 254263 |
| A_23_P23341  | -1.1 | 2.2  | 2.2  | 1.3  | CNKSR1 | Homo sapiens connector enhancer of kinase suppressor of Ras 1 (CNKSR1), transcript variant 1, mRNA [NM_006314] | 10256  |
| A_23_P46947  | -1.2 | -3.6 | -1.4 | -1.3 | CNNM1  | Homo sapiens cyclin M1 (CNNM1), mRNA [NM_020348]                                                               | 26507  |

|              |      |      |      |       |       |                                                                        |       |
|--------------|------|------|------|-------|-------|------------------------------------------------------------------------|-------|
| A_23_P24044  | -1.6 | -1.1 | -1.4 | -2.0  | CNNM2 | Homo sapiens cyclin M2 (CNNM2), transcript variant 1, mRNA [NM_017649] | 54805 |
| A_24_P184154 | 1.6  | 3.1  | 1.5  | 1.0   | CNNM2 | Homo sapiens cyclin M2 (CNNM2), transcript variant 1, mRNA [NM_017649] | 54805 |
| A_24_P93896  | 4.6  | 2.4  | 3.1  | 2.0   | CNNM2 | Homo sapiens cyclin M2 (CNNM2), transcript variant 3, mRNA [NM_199077] | 54805 |
| A_23_P69670  | 1.0  | -1.0 | -1.0 | -10.9 | CNO   | Homo sapiens cappuccino homolog (mouse) (CNO), mRNA [NM_018366]        | 55330 |

|              |      |      |     |      |       |                                                                                                        |       |
|--------------|------|------|-----|------|-------|--------------------------------------------------------------------------------------------------------|-------|
| A_23_P77371  | -1.1 | 2.6  | 1.1 | 1.1  | CNOT1 | Homo sapiens CCR4-NOT transcription complex, subunit 1 (CNOT1), transcript variant 1, mRNA [NM_016284] | 23019 |
| A_24_P101114 | 1.5  | -1.0 | 1.6 | 2.6  | CNOT1 | Homo sapiens CCR4-NOT transcription complex, subunit 1 (CNOT1), transcript variant 2, mRNA [NM_206999] | 23019 |
| A_23_P421147 | -1.3 | 1.7  | 4.0 | -1.9 | CNOT2 | Homo sapiens CCR4-NOT transcription complex, subunit 2 (CNOT2), transcript variant 2, mRNA [NM_014515] | 4848  |

|              |      |      |     |      |       |                                                                                                        |       |
|--------------|------|------|-----|------|-------|--------------------------------------------------------------------------------------------------------|-------|
| A_24_P8049   | -1.0 | 11.6 | 1.2 | 1.2  | CNOT2 | Homo sapiens CCR4-NOT transcription complex, subunit 2 (CNOT2), transcript variant 2, mRNA [NM_014515] | 4848  |
| A_23_P38987  | 1.9  | 1.8  | 1.0 | 6.4  | CNOT3 | Homo sapiens CCR4-NOT transcription complex, subunit 3 (CNOT3), mRNA [NM_014516]                       | 4849  |
| A_24_P941922 | 1.3  | -1.8 | 1.2 | -2.1 | CNOT4 | CCR4-NOT transcription complex, subunit 4 [Source:HGNC Symbol;Acc:7880] [ENST00000315544]              | 4850  |
| A_23_P167417 | 2.2  | 1.4  | 2.1 | 2.1  | CNOT6 | Homo sapiens CCR4-NOT transcription complex, subunit 6 (CNOT6), mRNA [NM_015455]                       | 57472 |

|              |      |      |      |      |        |                                                                                                        |        |
|--------------|------|------|------|------|--------|--------------------------------------------------------------------------------------------------------|--------|
| A_23_P18818  | 1.1  | 1.1  | -1.1 | -5.6 | CNOT6  | Homo sapiens CCR4-NOT transcription complex, subunit 6 (CNOT6), mRNA [NM_015455]                       | 57472  |
| A_23_P110304 | -1.0 | -5.9 | -1.1 | -2.2 | CNOT6L | Homo sapiens CCR4-NOT transcription complex, subunit 6-like (CNOT6L), mRNA [NM_144571]                 | 246175 |
| A_23_P216312 | 5.2  | 3.2  | 1.5  | 2.2  | CNOT7  | Homo sapiens CCR4-NOT transcription complex, subunit 7 (CNOT7), transcript variant 2, mRNA [NM_054026] | 29883  |
| A_23_P10798  | 1.0  | -2.5 | -1.1 | -1.7 | CNP    | Homo sapiens 2',3'-cyclic nucleotide 3' phosphodiesterase (CNP), mRNA [NM_033133]                      | 1267   |



|              |      |      |      |      |        |                                                                                            |       |
|--------------|------|------|------|------|--------|--------------------------------------------------------------------------------------------|-------|
| A_24_P128683 | -1.3 | -2.0 | 1.1  | -2.0 | CNPPD1 | Homo sapiens cyclin Pas1/PHO 80 domain containing 1 (CNPPD1), mRNA [NM_015680]             | 27013 |
| A_24_P16503  | -1.2 | -1.5 | -3.7 | -1.9 | CNPY3  | Homo sapiens HSPC084 mRNA, partial cds. [AF161347]                                         | 10695 |
| A_24_P363259 | 2.6  | -1.5 | -1.1 | -1.7 | CNR1   | Homo sapiens cannabinoid receptor 1 (brain) (CNR1), transcript variant 2, mRNA [NM_033181] | 1268  |
| A_32_P48054  | -2.1 | -2.0 | -1.0 | 1.1  | CNR2   | cannabinoid receptor 2 (macrophage) [Source:HGNC Symbol;Acc:2160] [ENST00000374472]        | 1269  |

|              |      |      |      |      |       |                                                                                            |       |
|--------------|------|------|------|------|-------|--------------------------------------------------------------------------------------------|-------|
| A_23_P157963 | -2.1 | -1.0 | -1.1 | -1.9 | CNTLN | Homo sapiens centlein, centrosomal protein (CNTLN), transcript variant 1, mRNA [NM_017738] | 54875 |
| A_32_P95082  | 1.5  | 2.4  | 1.4  | 1.0  | CNTLN | Homo sapiens centlein, centrosomal protein (CNTLN), transcript variant 1, mRNA [NM_017738] | 54875 |
| A_24_P924217 | -2.4 | -1.0 | -1.1 | 1.0  | CNTLN | centlein, centrosomal protein [Source:HGNC Symbol;Acc:23432] [ENST00000484374]             | 54875 |
| A_24_P128200 | 1.2  | 1.2  | 1.1  | -2.6 | CNTN1 | contactin 1 [Source:HGNC Symbol;Acc:2171] [ENST00000547849]                                | 1272  |

|              |      |     |     |     |         |                                                                             |       |
|--------------|------|-----|-----|-----|---------|-----------------------------------------------------------------------------|-------|
| A_23_P204541 | 2.1  | 2.1 | 3.0 | 1.1 | CNTN1   | contactin 1<br>[Source:HGNC Symbol;Acc:2171]<br>[ENST00000551295]           | 1272  |
| A_24_P2901   | -3.2 | 1.3 | 1.1 | 1.4 | CNTN2   | Homo sapiens contactin 2 (axonal) (CNTN2), mRNA<br>[NM_005076]              | 6900  |
| A_32_P92188  | -2.3 | 1.1 | 1.0 | 1.0 | CNTN5   | Homo sapiens contactin 5 (CNTN5), transcript variant 1, mRNA<br>[NM_014361] | 53942 |
| A_23_P503059 | -2.0 | 3.4 | 1.4 | 1.8 | CNTN5   | Homo sapiens contactin 5 (CNTN5), transcript variant 1, mRNA<br>[NM_014361] | 53942 |
| A_23_P411113 | 3.8  | 3.7 | 2.6 | 3.6 | CNTNAP1 | Homo sapiens contactin associated protein 1 (CNTNAP1), mRNA<br>[NM_003632]  | 8506  |

|              |       |      |      |      |          |                                                                                                                |        |
|--------------|-------|------|------|------|----------|----------------------------------------------------------------------------------------------------------------|--------|
| A_24_P418203 | -3.1  | -1.0 | -1.0 | 1.1  | CNTNAP3  | Homo sapiens contactin associated protein-like 3 (CNTNAP3), mRNA [NM_033655]                                   | 79937  |
| A_24_P652609 | -4.1  | -1.7 | -2.5 | -1.3 | CNTNAP3B | Homo sapiens contactin associated protein-like 3B (CNTNAP3B), mRNA [NM_001201380]                              | 728577 |
| A_23_P9768   | 1.1   | 1.4  | -3.7 | -1.1 | CNTROB   | Homo sapiens centrobin, centrosomal BRCA2 interacting protein (CNTROB), transcript variant 1, mRNA [NM_053051] | 116840 |
| A_23_P39910  | -24.2 | -1.0 | -1.0 | -1.0 | COA5     | Homo sapiens cytochrome C oxidase assembly factor 5 (COA5), mRNA [NM_001008215]                                | 493753 |

|              |      |      |     |      |        |                                                                                                                        |       |
|--------------|------|------|-----|------|--------|------------------------------------------------------------------------------------------------------------------------|-------|
| A_23_P4144   | -6.3 | 3.5  | 1.9 | 1.9  | COASY  | Homo sapiens CoA synthase (COASY), nuclear gene encoding mitochondrial protein, transcript variant 1, mRNA [NM_025233] | 80347 |
| A_32_P228804 | 4.1  | -1.7 | 1.6 | 2.8  | COBLL1 | COBL-like 1 [Source:HGNC Symbol;Acc:23571] [ENST0000375458]                                                            | 22837 |
| A_24_P915926 | 1.5  | 1.5  | 2.0 | -2.9 | COBLL1 | COBL-like 1 [Source:HGNC Symbol;Acc:23571] [ENST0000496396]                                                            | 22837 |
| A_23_P148150 | 1.2  | -2.3 | 1.6 | 1.2  | COBRA1 | Homo sapiens cofactor of BRCA1 (COBRA1), mRNA [NM_015456]                                                              | 25920 |

|              |      |      |      |      |      |                                                                                                                        |       |
|--------------|------|------|------|------|------|------------------------------------------------------------------------------------------------------------------------|-------|
| A_24_P184803 | -1.3 | -1.0 | -1.1 | -2.0 | COCH | Homo sapiens coagulation factor C homolog, cochlin (Limulus polyphemus) (COCH), transcript variant 2, mRNA [NM_004086] | 1690  |
| A_23_P50020  | -5.0 | -1.2 | -1.0 | 1.1  | COG1 | Homo sapiens component of oligomeric golgi complex 1 (COG1), mRNA [NM_018714]                                          | 9382  |
| A_23_P402437 | -9.8 | 1.0  | -6.8 | 1.1  | COG2 | component of oligomeric golgi complex 2 [Source:HGNC Symbol;Acc:6546] [ENST00000494371]                                | 22796 |

|              |      |      |      |       |      |                                                                                                     |       |
|--------------|------|------|------|-------|------|-----------------------------------------------------------------------------------------------------|-------|
| A_24_P310946 | 1.1  | 1.0  | -4.0 | 1.1   | COG2 | Homo sapiens component of oligomeric golgi complex 2 (COG2), transcript variant 1, mRNA [NM_007357] | 22796 |
| A_23_P2692   | -1.7 | -2.4 | -2.3 | -2.4  | COG3 | Homo sapiens component of oligomeric golgi complex 3 (COG3), mRNA [NM_031431]                       | 83548 |
| A_24_P296070 | 1.0  | 1.0  | -1.0 | -11.8 | COG3 | Homo sapiens component of oligomeric golgi complex 3 (COG3), mRNA [NM_031431]                       | 83548 |
| A_23_P320717 | 4.8  | 4.0  | 2.1  | 4.5   | COG4 | Homo sapiens component of oligomeric golgi complex 4 (COG4), transcript variant 1, mRNA [NM_015386] | 25839 |

|              |      |      |      |      |         |                                                                               |       |
|--------------|------|------|------|------|---------|-------------------------------------------------------------------------------|-------|
| A_23_P329361 | 1.2  | -1.1 | -1.2 | -2.1 | COG7    | Homo sapiens component of oligomeric golgi complex 7 (COG7), mRNA [NM_153603] | 91949 |
| A_24_P155815 | 1.9  | -6.7 | -1.3 | -1.0 | COG8    | Homo sapiens component of oligomeric golgi complex 8 (COG8), mRNA [NM_032382] | 84342 |
| A_23_P26729  | 2.4  | 1.3  | 1.9  | 2.2  | COIL    | Homo sapiens coilin (COIL), mRNA [NM_004645]                                  | 8161  |
| A_23_P214144 | -1.4 | 1.2  | -1.1 | -2.1 | COL10A1 | Homo sapiens collagen, type X, alpha 1 (COL10A1), mRNA [NM_000493]            | 1300  |



|              |       |      |      |      |         |                                                                                               |      |
|--------------|-------|------|------|------|---------|-----------------------------------------------------------------------------------------------|------|
| A_23_P42322  | 1.0   | -9.3 | -2.6 | 1.0  | COL11A2 | Homo sapiens collagen, type XI, alpha 2 (COL11A2), transcript variant 1, mRNA [NM_080680]     | 1302 |
| A_23_P214168 | 1.0   | -1.0 | 1.1  | -3.4 | COL12A1 | Homo sapiens collagen, type XII, alpha 1 (COL12A1), transcript variant long, mRNA [NM_004370] | 1303 |
| A_32_P80850  | 1.2   | 1.6  | -1.1 | 3.2  | COL14A1 | Homo sapiens collagen, type XIV, alpha 1 (COL14A1), mRNA [NM_021110]                          | 7373 |
| A_24_P254789 | -11.5 | 1.2  | 1.1  | -1.9 | COL14A1 | Homo sapiens collagen, type XIV, alpha 1 (COL14A1), mRNA [NM_021110]                          | 7373 |

|              |      |      |      |      |         |                                                                                              |       |
|--------------|------|------|------|------|---------|----------------------------------------------------------------------------------------------|-------|
| A_23_P501010 | -1.0 | -1.0 | -2.7 | -1.5 | COL17A1 | Homo sapiens collagen, type XVII, alpha 1 (COL17A1), mRNA [NM_000494]                        | 1308  |
| A_24_P57426  | -1.9 | -1.3 | -4.5 | -4.0 | COL18A1 | Homo sapiens collagen, type XVIII, alpha 1 (COL18A1), transcript variant 1, mRNA [NM_030582] | 80781 |
| A_23_P211212 | -2.3 | -2.3 | -2.4 | -2.4 | COL18A1 | Homo sapiens collagen, type XVIII, alpha 1 (COL18A1), transcript variant 1, mRNA [NM_030582] | 80781 |
| A_24_P265274 | 4.2  | 4.2  | 4.0  | 3.8  | COL1A2  | Homo sapiens collagen, type I, alpha 2 (COL1A2), mRNA [NM_000089]                            | 1278  |

|              |      |      |      |      |         |                                                                                            |       |
|--------------|------|------|------|------|---------|--------------------------------------------------------------------------------------------|-------|
| A_32_P185637 | -3.7 | 1.1  | -1.3 | -1.0 | COL20A1 | Homo sapiens collagen, type XX, alpha 1 (COL20A1), mRNA [NM_020882]                        | 57642 |
| A_23_P387031 | -1.2 | 2.2  | -1.3 | -1.8 | COL23A1 | Homo sapiens collagen, type XXIII, alpha 1 (COL23A1), mRNA [NM_173465]                     | 91522 |
| A_23_P58427  | 1.8  | -1.3 | -2.4 | 1.3  | COL25A1 | Homo sapiens collagen, type XXV, alpha 1 (COL25A1), transcript variant 2, mRNA [NM_032518] | 84570 |
| A_24_P257478 | 11.4 | 7.9  | 2.6  | 9.5  | COL25A1 | Homo sapiens collagen, type XXV, alpha 1 (COL25A1), transcript variant 1, mRNA [NM_198721] | 84570 |

|              |      |      |      |      |         |                                                                            |       |
|--------------|------|------|------|------|---------|----------------------------------------------------------------------------|-------|
| A_24_P363896 | -1.8 | -1.1 | -2.8 | -2.0 | COL27A1 | Homo sapiens collagen, type XXVII, alpha 1 (COL27A1), mRNA [NM_032888]     | 85301 |
| A_24_P935491 | -3.0 | -1.0 | -1.1 | -2.1 | COL3A1  | Homo sapiens collagen, type III, alpha 1 (COL3A1), mRNA [NM_000090]        | 1281  |
| A_24_P68342  | -1.7 | -2.9 | -1.5 | -1.2 | COL4A1  | Homo sapiens collagen, type IV, alpha 1 (COL4A1), mRNA [NM_001845]         | 1282  |
| A_23_P205031 | -1.3 | -2.5 | 1.0  | -1.1 | COL4A2  | Homo sapiens collagen, type IV, alpha 2 (COL4A2), mRNA [NM_001846]         | 1284  |
| A_24_P915591 | 1.6  | 1.5  | -3.7 | -1.1 | COL4A6  | collagen, type IV, alpha 6 [Source:HGNC Symbol;Acc:2208] [ENST00000461897] | 1288  |

|              |      |       |      |      |        |                                                                                            |      |
|--------------|------|-------|------|------|--------|--------------------------------------------------------------------------------------------|------|
| A_23_P158593 | -1.5 | -3.3  | -1.0 | -1.6 | COL5A1 | Homo sapiens collagen, type V, alpha 1 (COL5A1), mRNA [NM_000093]                          | 1289 |
| A_32_P218734 | -1.0 | -22.1 | -1.0 | 1.2  | COL5A2 | Homo sapiens collagen, type V, alpha 2 (COL5A2), mRNA [NM_000393]                          | 1290 |
| A_32_P32254  | 1.1  | -1.0  | -2.3 | 1.1  | COL6A1 | Homo sapiens collagen, type VI, alpha 1 (COL6A1), mRNA [NM_001848]                         | 1291 |
| A_24_P331918 | -1.2 | 1.0   | -1.3 | -2.7 | COL6A1 | Homo sapiens collagen, type VI, alpha 1 (COL6A1), mRNA [NM_001848]                         | 1291 |
| A_23_P211233 | -1.6 | -2.5  | -1.2 | -1.9 | COL6A2 | Homo sapiens collagen, type VI, alpha 2 (COL6A2), transcript variant 2C2, mRNA [NM_001849] | 1292 |

|              |      |      |      |       |        |                                                                                            |        |
|--------------|------|------|------|-------|--------|--------------------------------------------------------------------------------------------|--------|
| A_23_P131614 | 1.2  | 4.3  | 3.1  | 1.0   | COL6A3 | Homo sapiens collagen, type VI, alpha 3 (COL6A3), transcript variant 1, mRNA [NM_004369]   | 1293   |
| A_32_P224525 | -1.1 | -1.1 | -1.2 | -20.0 | COL6A6 | Homo sapiens collagen, type VI, alpha 6 (COL6A6), mRNA [NM_001102608]                      | 131873 |
| A_23_P144071 | -1.0 | 1.5  | 1.3  | -2.3  | COL7A1 | Homo sapiens collagen, type VII, alpha 1 (COL7A1), mRNA [NM_000094]                        | 1294   |
| A_23_P69030  | 2.4  | 2.3  | 2.1  | 2.5   | COL8A1 | Homo sapiens collagen, type VIII, alpha 1 (COL8A1), transcript variant 1, mRNA [NM_001850] | 1295   |

|              |      |      |      |      |        |                                                                                                                                                          |      |
|--------------|------|------|------|------|--------|----------------------------------------------------------------------------------------------------------------------------------------------------------|------|
| A_24_P365975 | 1.8  | 3.1  | 1.4  | -1.1 | COL8A2 | Homo sapiens collagen, type VIII, alpha 2 (COL8A2), mRNA [NM_005202]                                                                                     | 1296 |
| A_24_P311856 | -2.2 | -1.9 | -5.4 | -1.9 | COL9A1 | Homo sapiens collagen, type IX, alpha 1 (COL9A1), transcript variant 1, mRNA [NM_001851]                                                                 | 1297 |
| A_23_P40108  | 1.0  | -2.7 | -1.1 | -1.0 | COL9A3 | Homo sapiens collagen, type IX, alpha 3 (COL9A3), mRNA [NM_001853]                                                                                       | 1299 |
| A_24_P26160  | 1.4  | 2.4  | 1.1  | 1.4  | COLQ   | Homo sapiens collagen-like tail subunit (single strand of homotrimer) of asymmetric acetylcholinesterase (COLQ), transcript variant II, mRNA [NM_080538] | 8292 |

|              |      |      |      |       |        |                                                                                                                                                          |       |
|--------------|------|------|------|-------|--------|----------------------------------------------------------------------------------------------------------------------------------------------------------|-------|
| A_23_P212126 | 1.7  | 1.7  | 3.8  | 1.0   | COLQ   | Homo sapiens collagen-like tail subunit (single strand of homotrimer) of asymmetric acetylcholinesterase (COLQ), transcript variant II, mRNA [NM_080538] | 8292  |
| A_23_P40782  | -1.4 | -2.0 | -1.6 | -1.2  | COMMD2 | Homo sapiens COMM domain containing 2 (COMMD2), mRNA [NM_016094]                                                                                         | 51122 |
| A_24_P93371  | -1.2 | -1.2 | -1.4 | -29.3 | COMMD4 | Homo sapiens COMM domain containing 4 (COMMD4), mRNA [NM_017828]                                                                                         | 54939 |



|              |      |      |      |       |        |                                                                                        |        |
|--------------|------|------|------|-------|--------|----------------------------------------------------------------------------------------|--------|
| A_24_P331904 | 3.2  | 2.2  | 1.7  | -1.0  | COMMD4 | Homo sapiens COMM domain containing 4 (COMMD4), mRNA [NM_017828]                       | 54939  |
| A_23_P420428 | -2.5 | -2.7 | -6.5 | -3.7  | COMMD7 | Homo sapiens COMM domain containing 7 (COMMD7), transcript variant 1, mRNA [NM_053041] | 149951 |
| A_24_P264943 | 1.1  | -4.2 | -1.5 | -2.3  | COMP   | Homo sapiens cartilage oligomeric matrix protein (COMP), mRNA [NM_000095]              | 1311   |
| A_23_P90436  | 1.3  | -1.0 | -1.1 | -21.6 | COMP   | Homo sapiens cartilage oligomeric matrix protein (COMP), mRNA [NM_000095]              | 1311   |

|              |     |     |      |     |       |                                                                                                                    |       |
|--------------|-----|-----|------|-----|-------|--------------------------------------------------------------------------------------------------------------------|-------|
| A_23_P325932 | 1.6 | 1.6 | 2.9  | 1.6 | COPA  | Homo sapiens coatomer protein complex, subunit alpha (COPA), transcript variant 2, mRNA [NM_004371]                | 1314  |
| A_23_P91891  | 1.0 | 1.0 | -2.5 | 1.0 | COPB2 | Homo sapiens coatomer protein complex, subunit beta 2 (beta prime) (COPB2), transcript variant 1, mRNA [NM_004766] | 9276  |
| A_24_P389959 | 2.0 | 2.6 | -1.0 | 1.4 | COPZ1 | Homo sapiens coatomer protein complex, subunit zeta 1 (COPZ1), mRNA [NM_016057]                                    | 22818 |

|              |     |     |     |      |      |                                                                                                                        |       |
|--------------|-----|-----|-----|------|------|------------------------------------------------------------------------------------------------------------------------|-------|
| A_23_P111228 | 5.7 | 5.7 | 5.5 | 5.6  | COQ3 | Homo sapiens coenzyme Q3 homolog, methyltransferase (S. cerevisiae) (COQ3), mRNA [NM_017421]                           | 51805 |
| A_24_P389491 | 1.6 | 2.1 | 1.4 | -1.3 | COQ4 | Homo sapiens coenzyme Q4 homolog (S. cerevisiae) (COQ4), nuclear gene encoding mitochondrial protein, mRNA [NM_016035] | 51117 |

|              |      |     |      |      |      |                                                                                                                                                             |       |
|--------------|------|-----|------|------|------|-------------------------------------------------------------------------------------------------------------------------------------------------------------|-------|
| A_23_P65584  | 1.1  | 1.1 | 1.3  | -2.4 | COQ6 | Homo sapiens coenzyme Q6 homolog, monooxygenase (S. cerevisiae) (COQ6), nuclear gene encoding mitochondrial protein, transcript variant 1, mRNA [NM_182476] | 51004 |
| A_23_P152322 | -5.3 | 1.3 | 1.9  | -1.2 | COQ7 | Homo sapiens coenzyme Q7 homolog, ubiquinone (yeast) (COQ7), transcript variant 1, mRNA [NM_016138]                                                         | 10229 |
| A_24_P398972 | -2.1 | 1.1 | -1.2 | -3.6 | COQ7 | Homo sapiens coenzyme Q7 homolog, ubiquinone (yeast) (COQ7), transcript variant 1, mRNA [NM_016138]                                                         | 10229 |

|              |      |      |      |     |       |                                                                                                                        |       |
|--------------|------|------|------|-----|-------|------------------------------------------------------------------------------------------------------------------------|-------|
| A_24_P932308 | 2.6  | 2.8  | 2.0  | 1.8 | COQ9  | Homo sapiens cDNA PSEC0129 fis, clone PLACE1004170. [AK075438]                                                         | 57017 |
| A_23_P14928  | 2.0  | -5.6 | 1.9  | 1.3 | COQ9  | Homo sapiens coenzyme Q9 homolog (S. cerevisiae) (COQ9), nuclear gene encoding mitochondrial protein, mRNA [NM_020312] | 57017 |
| A_23_P81131  | -1.3 | 1.0  | -2.0 | 1.2 | CORIN | Homo sapiens corin, serine peptidase (CORIN), mRNA [NM_006587]                                                         | 10699 |

|              |      |      |      |      |        |                                                                                                  |       |
|--------------|------|------|------|------|--------|--------------------------------------------------------------------------------------------------|-------|
| A_23_P104583 | -3.2 | -2.7 | -2.0 | -1.6 | CORO1B | Homo sapiens coronin, actin binding protein, 1B (CORO1B), transcript variant 1, mRNA [NM_020441] | 57175 |
| A_23_P117694 | 1.6  | -1.0 | 1.9  | 2.0  | CORO2B | Homo sapiens coronin, actin binding protein, 2B (CORO2B), transcript variant 1, mRNA [NM_006091] | 10391 |
| A_23_P107322 | 4.4  | 1.0  | 1.5  | -2.5 | CORO6  | Homo sapiens coronin 6 (CORO6), mRNA [NM_032854]                                                 | 84940 |
| A_23_P38046  | 3.1  | 4.3  | 1.2  | 2.9  | CORO7  | Homo sapiens coronin 7 (CORO7), transcript variant 1, mRNA [NM_024535]                           | 79585 |

|              |      |      |      |      |       |                                                                                                |       |
|--------------|------|------|------|------|-------|------------------------------------------------------------------------------------------------|-------|
| A_23_P258164 | 2.0  | 4.9  | 1.2  | 1.2  | CORT  | Homo sapiens cortistatin (CORT), mRNA [NM_001302]                                              | 1325  |
| A_23_P83624  | -1.0 | -4.6 | -1.0 | -1.0 | COTL1 | Homo sapiens coactosin-like 1 (Dictyostelium) (COTL1), mRNA [NM_021149]                        | 23406 |
| A_32_P158385 | -1.5 | -1.5 | -1.5 | -4.5 | COTL1 | Human autonomously replicating sequence (ARS) mRNA. [L08436]                                   | 23406 |
| A_23_P301925 | 1.8  | 2.4  | 2.0  | 1.2  | COX1  | mitochondrially encoded cytochrome c oxidase I [Source:HGNC Symbol;Acc:7419] [ENST00000361624] | 4512  |

|              |     |      |      |      |       |                                                                                                                                                               |       |
|--------------|-----|------|------|------|-------|---------------------------------------------------------------------------------------------------------------------------------------------------------------|-------|
| A_24_P391531 | 1.0 | -1.0 | -3.0 | -1.7 | COX11 | Homo sapiens COX11 cytochrome c oxidase assembly homolog (yeast) (COX11), nuclear gene encoding mitochondrial protein, transcript variant 1, mRNA [NM_004375] | 1353  |
| A_23_P144244 | 1.0 | -1.4 | -1.0 | -2.1 | COX17 | COX17 cytochrome c oxidase assembly homolog (S. cerevisiae) [Source:HGNC Symbol;Acc:2264] [ENST00000484810]                                                   | 10063 |



|              |     |     |      |      |       |                                                                                                                                                 |        |
|--------------|-----|-----|------|------|-------|-------------------------------------------------------------------------------------------------------------------------------------------------|--------|
| A_24_P208897 | 1.1 | 1.1 | -1.0 | -4.0 | COX18 | Homo sapiens COX18 cytochrome c oxidase assembly homolog (S. cerevisiae) (COX18), nuclear gene encoding mitochondrial protein, mRNA [NM_173827] | 285521 |
| A_24_P350200 | 1.9 | 1.8 | -1.2 | 2.0  | COX3  | mitochondrially encoded cytochrome c oxidase III [Source:HGNC Symbol;Acc:7422] [ENST00000362079]                                                | 4514   |

|              |      |     |     |      |        |                                                                                                                                       |       |
|--------------|------|-----|-----|------|--------|---------------------------------------------------------------------------------------------------------------------------------------|-------|
| A_23_P210869 | -1.9 | 1.7 | 1.1 | -4.2 | COX4I2 | Homo sapiens cytochrome c oxidase subunit IV isoform 2 (lung) (COX4I2), nuclear gene encoding mitochondrial protein, mRNA [NM_032609] | 84701 |
| A_32_P98502  | 7.5  | 7.3 | 7.2 | 7.1  | COX5A  | Homo sapiens cytochrome c oxidase subunit Va (COX5A), nuclear gene encoding mitochondrial protein, mRNA [NM_004255]                   | 9377  |

|              |      |      |      |      |        |                                                                                                                                                  |      |
|--------------|------|------|------|------|--------|--------------------------------------------------------------------------------------------------------------------------------------------------|------|
| A_23_P401524 | -2.7 | -1.5 | -6.2 | -4.7 | COX6A2 | Homo sapiens cytochrome c oxidase subunit VIa polypeptide 2, mRNA (cDNA clone MGC:34466 IMAGE:5174639), complete cds. [BC029818]                 | 1339 |
| A_23_P108244 | -2.1 | -2.4 | -1.7 | -1.2 | COX6B1 | Homo sapiens cytochrome c oxidase subunit VIb polypeptide 1 (ubiquitous) (COX6B1), nuclear gene encoding mitochondrial protein, mRNA [NM_001863] | 1340 |

|             |      |      |      |      |        |                                                                                                                                                                    |      |
|-------------|------|------|------|------|--------|--------------------------------------------------------------------------------------------------------------------------------------------------------------------|------|
| A_23_P67661 | -1.1 | -1.1 | -2.2 | -1.2 | COX7A1 | Homo sapiens cytochrome c oxidase subunit VIIa polypeptide 1 (muscle) (COX7A1), nuclear gene encoding mitochondrial protein, mRNA [NM_001864]                      | 1346 |
| A_23_P81690 | 1.2  | 3.2  | -1.7 | -1.2 | COX7A2 | Homo sapiens cytochrome c oxidase subunit VIIa polypeptide 2 (liver) (COX7A2), nuclear gene encoding mitochondrial protein, transcript variant 1, mRNA [NM_001865] | 1347 |

|              |       |      |      |      |        |                                                                                                                       |        |
|--------------|-------|------|------|------|--------|-----------------------------------------------------------------------------------------------------------------------|--------|
| A_23_P136246 | -10.9 | 1.0  | -1.0 | -1.7 | COX7B2 | Homo sapiens cytochrome c oxidase subunit VIIb2 (COX7B2), mRNA [NM_130902]                                            | 170712 |
| A_23_P110811 | 13.3  | 13.0 | 12.6 | 13.5 | COX7C  | Homo sapiens cytochrome c oxidase subunit VIIc (COX7C), nuclear gene encoding mitochondrial protein, mRNA [NM_001867] | 1350   |
| A_23_P414793 | 1.5   | 2.3  | -1.1 | -1.0 | CP     | Homo sapiens ceruloplasmin (ferroxidase) (CP), mRNA [NM_000096]                                                       | 1356   |
| A_23_P31161  | 2.0   | 2.0  | 2.0  | 1.9  | CPA2   | Homo sapiens carboxypeptidase A2 (pancreatic) (CPA2), mRNA [NM_001869]                                                | 1358   |

|              |     |      |      |      |       |                                                                                                                    |        |
|--------------|-----|------|------|------|-------|--------------------------------------------------------------------------------------------------------------------|--------|
| A_23_P18017  | 2.6 | 1.0  | 1.4  | -1.0 | CPA3  | Homo sapiens carboxypeptidase A3 (mast cell) (CPA3), mRNA [NM_001870]                                              | 1359   |
| A_24_P4170   | 1.0 | 1.0  | -1.0 | 2.4  | CPA6  | Homo sapiens carboxypeptidase A6 (CPA6), mRNA [NM_020361]                                                          | 57094  |
| A_32_P225355 | 2.7 | -1.3 | -1.2 | 1.3  | CPEB2 | Homo sapiens cytoplasmic polyadenylation element binding protein 2 (CPEB2), transcript variant B, mRNA [NM_182485] | 132864 |

|              |      |      |      |      |       |                                                                                                                    |        |
|--------------|------|------|------|------|-------|--------------------------------------------------------------------------------------------------------------------|--------|
| A_23_P46812  | 5.3  | 5.2  | 4.9  | 5.3  | CPEB3 | Homo sapiens cytoplasmic polyadenylation element binding protein 3 (CPEB3), transcript variant 1, mRNA [NM_014912] | 22849  |
| A_24_P58740  | 1.1  | 1.1  | -2.3 | -1.8 | CPEB4 | Homo sapiens cytoplasmic polyadenylation element binding protein 4 (CPEB4), mRNA [NM_030627]                       | 80315  |
| A_24_P391868 | -1.2 | -1.2 | -1.0 | -5.1 | CPLX2 | Homo sapiens complexin 2 (CPLX2), transcript variant 1, mRNA [NM_006650]                                           | 10814  |
| A_23_P117851 | -5.4 | -1.0 | -1.1 | -1.1 | CPLX3 | Homo sapiens complexin 3 (CPLX3), mRNA [NM_001030005]                                                              | 594855 |

|              |      |       |      |      |       |                                                                               |        |
|--------------|------|-------|------|------|-------|-------------------------------------------------------------------------------|--------|
| A_24_P938352 | 2.2  | 2.3   | -2.0 | 1.2  | CPM   | Homo sapiens carboxypeptidase M (CPM), transcript variant 1, mRNA [NM_001874] | 1368   |
| A_23_P98147  | -1.2 | -10.4 | 1.1  | -2.1 | CPN1  | Homo sapiens carboxypeptidase N, polypeptide 1 (CPN1), mRNA [NM_001308]       | 1369   |
| A_23_P37988  | 1.4  | 2.5   | 1.2  | 1.5  | CPNE2 | Homo sapiens copine II (CPNE2), mRNA [NM_152727]                              | 221184 |
| A_24_P64126  | 2.6  | 1.3   | 1.6  | 2.1  | CPNE3 | Homo sapiens copine III (CPNE3), mRNA [NM_003909]                             | 8895   |
| A_23_P94370  | 1.6  | -1.0  | 1.0  | -2.1 | CPNE3 | Homo sapiens copine III (CPNE3), mRNA [NM_003909]                             | 8895   |



|              |     |     |      |      |       |                                                                                               |        |
|--------------|-----|-----|------|------|-------|-----------------------------------------------------------------------------------------------|--------|
| A_23_P151595 | 8.3 | 1.9 | 2.1  | 1.8  | CPNE6 | Homo sapiens copine VI (neuronal) (CPNE6), mRNA [NM_006032]                                   | 9362   |
| A_23_P26426  | 2.1 | 2.5 | -2.5 | -1.8 | CPNE7 | Homo sapiens copine VII (CPNE7), transcript variant 2, mRNA [NM_014427]                       | 27132  |
| A_24_P56240  | 1.0 | 1.0 | -2.4 | -2.7 | CPNE8 | Homo sapiens copine VIII (CPNE8), mRNA [NM_153634]                                            | 144402 |
| A_23_P144179 | 3.3 | 4.4 | 1.3  | 2.9  | CPOX  | Homo sapiens coproporphyrinogen oxidase (CPOX), mRNA [NM_000097]                              | 1371   |
| A_23_P169112 | 1.8 | 2.2 | -3.2 | 1.4  | CPSF1 | Homo sapiens cleavage and polyadenylation specific factor 1, 160kDa (CPSF1), mRNA [NM_013291] | 29894  |

|              |      |      |      |      |        |                                                                                                                                                     |       |
|--------------|------|------|------|------|--------|-----------------------------------------------------------------------------------------------------------------------------------------------------|-------|
| A_23_P35030  | 1.0  | -1.0 | -2.4 | -1.0 | CPSF3L | Homo sapiens cleavage and polyadenylation specific factor 3-like (CPSF3L), mRNA [NM_017871]                                                         | 54973 |
| A_23_P42997  | -1.3 | 2.2  | -1.2 | -1.2 | CPSF4  | Homo sapiens cleavage and polyadenylation specific factor 4, 30kDa (CPSF4), transcript variant 1, mRNA [NM_006693]                                  | 10898 |
| A_24_P347065 | 2.2  | 2.7  | 4.6  | 1.4  | CPT1A  | Homo sapiens carnitine palmitoyltransferase 1A (liver) (CPT1A), nuclear gene encoding mitochondrial protein, transcript variant 1, mRNA [NM_001876] | 1374  |

|              |     |      |      |      |       |                                                                                                                                                        |        |
|--------------|-----|------|------|------|-------|--------------------------------------------------------------------------------------------------------------------------------------------------------|--------|
| A_23_P104563 | 1.8 | 2.5  | 1.3  | 1.4  | CPT1A | Homo sapiens carnitine palmitoyltransferase 1A (liver) (CPT1A), nuclear gene encoding mitochondrial protein, transcript variant 2, mRNA [NM_001031847] | 1374   |
| A_23_P16283  | 2.6 | 1.7  | -1.5 | -1.1 | CPT1C | Homo sapiens carnitine palmitoyltransferase 1C (CPT1C), transcript variant 2, mRNA [NM_152359]                                                         | 126129 |
| A_23_P148919 | 1.8 | -1.1 | -1.1 | -3.5 | CPT2  | Homo sapiens carnitine palmitoyltransferase 2 (CPT2), nuclear gene encoding mitochondrial protein, mRNA [NM_000098]                                    | 1376   |

|              |      |      |      |      |        |                                                                                                        |       |
|--------------|------|------|------|------|--------|--------------------------------------------------------------------------------------------------------|-------|
| A_23_P62336  | -4.9 | -1.0 | -4.1 | -1.0 | CPXCR1 | Homo sapiens CPX chromosome region, candidate 1 (CPXCR1), transcript variant 1, mRNA [NM_033048]       | 53336 |
| A_23_P6066   | 1.2  | 1.4  | 2.4  | 1.1  | CPXM1  | Homo sapiens carboxypeptidase X (M14 family), member 1 (CPXM1), transcript variant 1, mRNA [NM_019609] | 56265 |
| A_23_P124542 | 1.2  | 1.0  | -2.5 | -1.4 | CR2    | Human CR2/CD21/C3d/Epstein-Barr virus receptor mRNA, complete cds. [M26004]                            | 1380  |
| A_23_P117882 | 2.6  | 1.7  | 2.1  | 1.2  | CRABP1 | Homo sapiens cellular retinoic acid binding protein 1 (CRABP1), mRNA [NM_004378]                       | 1381  |

|              |      |      |      |      |         |                                                                                                        |       |
|--------------|------|------|------|------|---------|--------------------------------------------------------------------------------------------------------|-------|
| A_24_P324871 | -1.0 | 1.3  | 1.2  | 3.6  | CRABP1  | Homo sapiens cDNA FLJ38687 fis, clone KIDNE2001117. [AK096006]                                         | 1381  |
| A_23_P115064 | 1.7  | 4.8  | 2.3  | 3.4  | CRABP2  | Homo sapiens cellular retinoic acid binding protein 2 (CRABP2), transcript variant 1, mRNA [NM_001878] | 1382  |
| A_23_P407992 | -2.3 | -1.0 | -2.2 | -1.0 | CRAMP1L | Homo sapiens Crm, cramped-like (Drosophila) (CRAMP1L), mRNA [NM_020825]                                | 57585 |
| A_24_P51279  | 2.0  | -1.2 | 1.2  | 1.0  | CRAMP1L | Crm, cramped-like (Drosophila) [Source:HGNC Symbol;Acc:14122] [ENST00000454337]                        | 57585 |

|              |      |      |      |      |         |                                                                                                                                        |       |
|--------------|------|------|------|------|---------|----------------------------------------------------------------------------------------------------------------------------------------|-------|
| A_32_P151437 | -3.1 | -2.3 | -1.3 | -1.4 | CRAMP1L | Homo sapiens Crm, cramped-like (Drosophila) (CRAMP1L), mRNA [NM_020825]                                                                | 57585 |
| A_23_P32199  | 5.2  | 5.1  | 3.8  | 1.2  | CRAT    | Homo sapiens carnitine O-acetyltransferase (CRAT), nuclear gene encoding mitochondrial protein, transcript variant 1, mRNA [NM_000755] | 1384  |
| A_23_P12357  | 1.0  | 1.0  | -1.7 | -2.1 | CRB1    | Homo sapiens crumbs homolog 1 (Drosophila) (CRB1), transcript variant 1, mRNA [NM_201253]                                              | 23418 |

|              |      |      |      |      |      |                                                                                     |       |
|--------------|------|------|------|------|------|-------------------------------------------------------------------------------------|-------|
| A_24_P351435 | 2.0  | 1.9  | -1.4 | 1.9  | CRBN | Homo sapiens cereblon (CRBN), transcript variant 1, mRNA [NM_016302]                | 51185 |
| A_23_P250930 | -3.6 | -2.0 | -2.9 | 1.0  | CRBN | Homo sapiens cereblon (CRBN), transcript variant 1, mRNA [NM_016302]                | 51185 |
| A_24_P286412 | -3.4 | -1.8 | -2.8 | 1.0  | CRCP | Homo sapiens CGRP receptor component (CRCP), transcript variant 1, mRNA [NM_014478] | 27297 |
| A_23_P134573 | -2.2 | -1.9 | -1.9 | -1.9 | CRCP | Homo sapiens CGRP receptor component (CRCP), transcript variant 1, mRNA [NM_014478] | 27297 |

|              |      |      |      |      |         |                                                                                           |       |
|--------------|------|------|------|------|---------|-------------------------------------------------------------------------------------------|-------|
| A_24_P191047 | -3.0 | 1.8  | -1.0 | -1.0 | CRCT1   | Homo sapiens cysteine-rich C-terminal 1 (CRCT1), mRNA [NM_019060]                         | 54544 |
| A_23_P12155  | 8.2  | 8.1  | 8.2  | 2.8  | CRCT1   | Homo sapiens cysteine-rich C-terminal 1 (CRCT1), mRNA [NM_019060]                         | 54544 |
| A_23_P423389 | -1.7 | -1.7 | -1.7 | -3.6 | CREB3   | Homo sapiens cAMP responsive element binding protein 3 (CREB3), mRNA [NM_006368]          | 10488 |
| A_23_P150407 | -1.9 | -1.7 | -4.4 | -1.8 | CREB3L1 | Homo sapiens cAMP responsive element binding protein 3-like 1 (CREB3L1), mRNA [NM_052854] | 90993 |



|              |     |     |      |      |         |                                                                                                         |        |
|--------------|-----|-----|------|------|---------|---------------------------------------------------------------------------------------------------------|--------|
| A_24_P180654 | 1.1 | 1.1 | -4.0 | -1.0 | CREB3L2 | cAMP responsive element binding protein 3-like 2<br>[Source:HGNC Symbol;Acc:23720]<br>[ENST00000452463] | 64764  |
| A_23_P108082 | 1.7 | 7.0 | 4.5  | 4.9  | CREB3L3 | Homo sapiens cAMP responsive element binding protein 3-like 3 (CREB3L3), mRNA<br>[NM_032607]            | 84699  |
| A_24_P322025 | 2.3 | 1.5 | 3.1  | 2.0  | CREBBP  | Homo sapiens CREB binding protein (CREBBP), transcript variant 1, mRNA<br>[NM_004380]                   | 1387   |
| A_23_P394986 | 2.1 | 1.1 | -1.2 | 2.0  | CREG2   | Homo sapiens cellular repressor of E1A-stimulated genes 2 (CREG2), mRNA<br>[NM_153836]                  | 200407 |

|              |      |      |      |       |        |                                                                                                     |       |
|--------------|------|------|------|-------|--------|-----------------------------------------------------------------------------------------------------|-------|
| A_23_P33465  | 3.7  | 1.5  | 1.2  | -1.7  | CRELD2 | Homo sapiens cysteine-rich with EGF-like domains 2 (CRELD2), transcript variant 2, mRNA [NM_024324] | 79174 |
| A_24_P922139 | -1.0 | -1.0 | -1.1 | -14.6 | CREM   | Homo sapiens cAMP responsive element modulator (CREM), transcript variant 16, mRNA [NM_182772]      | 1390  |
| A_24_P278393 | 13.9 | 21.4 | 13.9 | 13.5  | CREM   | Homo sapiens cAMP responsive element modulator (CREM), transcript variant 19, mRNA [NM_183013]      | 1390  |

|              |     |      |     |      |       |                                                                                                         |      |
|--------------|-----|------|-----|------|-------|---------------------------------------------------------------------------------------------------------|------|
| A_23_P414884 | 1.9 | 10.3 | 2.2 | 5.4  | CRHR1 | Homo sapiens corticotropin releasing hormone receptor 1 (CRHR1), transcript variant 2, mRNA [NM_004382] | 1394 |
| A_23_P215331 | 1.3 | -1.6 | 1.1 | -2.5 | CRHR2 | Homo sapiens corticotropin releasing hormone receptor 2 (CRHR2), transcript variant 1, mRNA [NM_001883] | 1395 |
| A_24_P926058 | 2.5 | 2.2  | 2.1 | 1.0  | CRHR2 | H.sapiens mRNA for CRF2 receptor, beta isoform, aberrantly spliced, (94bp deletion). [Y10152]           | 1395 |

|              |      |      |      |      |        |                                                                                                   |       |
|--------------|------|------|------|------|--------|---------------------------------------------------------------------------------------------------|-------|
| A_24_P323395 | 1.5  | 3.8  | -1.1 | -1.1 | CRIM1  | Homo sapiens cysteine rich transmembrane BMP regulator 1 (chordin-like) (CRIM1), mRNA [NM_016441] | 51232 |
| A_23_P112798 | -1.2 | -6.7 | -1.7 | -1.2 | CRIP2  | Homo sapiens cysteine-rich protein 2 (CRIP2), mRNA [NM_001312]                                    | 1397  |
| A_23_P133722 | -1.8 | -5.0 | -4.4 | -1.3 | CRISP1 | Homo sapiens cysteine-rich secretory protein 1 (CRISP1), transcript variant 1, mRNA [NM_001131]   | 167   |
| A_32_P173662 | 2.7  | 2.6  | 2.2  | 2.3  | CRISP2 | Homo sapiens cysteine-rich secretory protein 2 (CRISP2), transcript variant 1, mRNA [NM_003296]   | 7180  |

|              |      |      |      |      |          |                                                                                                               |       |
|--------------|------|------|------|------|----------|---------------------------------------------------------------------------------------------------------------|-------|
| A_23_P59960  | -1.4 | 1.0  | -1.5 | -2.3 | CRISPLD1 | Homo sapiens cysteine-rich secretory protein LCCL domain containing 1 (CRISPLD1), mRNA [NM_031461]            | 83690 |
| A_24_P339059 | 1.0  | -8.7 | -1.0 | 1.5  | CRISPLD2 | Homo sapiens cysteine-rich secretory protein LCCL domain containing 2 (CRISPLD2), mRNA [NM_031476]            | 83716 |
| A_23_P83556  | -1.0 | -1.0 | 2.3  | -1.0 | CRK      | Homo sapiens v-crk sarcoma virus CT10 oncogene homolog (avian) (CRK), transcript variant II, mRNA [NM_016823] | 1398  |

|              |      |      |      |      |       |                                                                                                               |       |
|--------------|------|------|------|------|-------|---------------------------------------------------------------------------------------------------------------|-------|
| A_24_P270814 | 8.7  | 8.6  | 8.4  | 8.5  | CRK   | Homo sapiens v-crk sarcoma virus CT10 oncogene homolog (avian) (CRK), transcript variant II, mRNA [NM_016823] | 1398  |
| A_24_P56887  | -2.2 | 1.1  | -1.1 | -1.0 | CRLF3 | Homo sapiens cytokine receptor-like factor 3 (CRLF3), mRNA [NM_015986]                                        | 51379 |
| A_23_P400435 | -1.0 | -2.7 | -1.0 | -1.0 | CRLS1 | Homo sapiens cardiolipin synthase 1 (CRLS1), transcript variant 1, mRNA [NM_019095]                           | 54675 |
| A_24_P20506  | -1.0 | 1.5  | -3.2 | 1.2  | CRMP1 | Homo sapiens collapsin response mediator protein 1 (CRMP1), transcript variant 1, mRNA [NM_001014809]         | 1400  |

|              |      |      |      |     |         |                                                                                                        |        |
|--------------|------|------|------|-----|---------|--------------------------------------------------------------------------------------------------------|--------|
| A_23_P131967 | 1.1  | -4.1 | 1.1  | 1.1 | CRNKL1  | Homo sapiens crooked neck pre-mRNA splicing factor-like 1 (Drosophila) (CRNKL1), mRNA [NM_016652]      | 51340  |
| A_23_P115202 | -1.2 | -1.7 | -3.9 | 1.4 | CRNN    | Homo sapiens cornulin (CRNN), mRNA [NM_016190]                                                         | 49860  |
| A_23_P104086 | 1.5  | 1.9  | 2.0  | 1.0 | CROCC   | Homo sapiens ciliary rootlet coiled-coil, rootletin (CROCC), mRNA [NM_014675]                          | 9696   |
| A_32_P384562 | 4.0  | 4.0  | 1.4  | 3.1 | CROCCP3 | Homo sapiens ciliary rootlet coiled-coil, rootletin pseudogene 3 (CROCCP3), non-coding RNA [NR_023386] | 114819 |

|              |      |      |      |      |        |                                                                                          |       |
|--------------|------|------|------|------|--------|------------------------------------------------------------------------------------------|-------|
| A_24_P342484 | -1.3 | -1.6 | -1.7 | -2.0 | CRP    | Homo sapiens C-reactive protein, pentraxin-related (CRP), mRNA [NM_000567]               | 1401  |
| A_23_P431971 | 1.1  | -2.8 | 1.0  | 1.1  | CRTAC1 | Homo sapiens cartilage acidic protein 1 (CRTAC1), transcript variant 1, mRNA [NM_018058] | 55118 |
| A_24_P71661  | -9.3 | -1.2 | -1.2 | -2.9 | CRTAP  | Homo sapiens cartilage associated protein (CRTAP), mRNA [NM_006371]                      | 10491 |
| A_24_P140171 | 1.0  | -5.2 | -1.0 | -1.0 | CRTAP  | Homo sapiens cartilage associated protein (CRTAP), mRNA [NM_006371]                      | 10491 |



|              |      |      |      |      |       |                                                                                                                                           |        |
|--------------|------|------|------|------|-------|-------------------------------------------------------------------------------------------------------------------------------------------|--------|
| A_24_P219952 | -1.8 | -3.2 | 1.1  | -3.0 | CRTC1 | Homo sapiens<br>CREB<br>regulated<br>transcription<br>coactivator 1<br>(CRTC1),<br>transcript<br>variant 3,<br>mRNA<br>[NM_0010<br>98482] | 23373  |
| A_23_P12173  | 1.5  | 2.1  | 1.9  | -1.0 | CRTC2 | Homo sapiens<br>CREB<br>regulated<br>transcription<br>coactivator 2<br>(CRTC2),<br>mRNA<br>[NM_1817<br>15]                                | 200186 |
| A_23_P388027 | 1.1  | -2.0 | -1.4 | -1.4 | CRY2  | Homo sapiens<br>cryptochrome 2<br>(photolyase-like)<br>(CRY2),<br>transcript<br>variant 1,<br>mRNA<br>[NM_0211<br>17]                     | 1408   |

|              |      |     |      |      |        |                                                                                              |      |
|--------------|------|-----|------|------|--------|----------------------------------------------------------------------------------------------|------|
| A_24_P158587 | 4.4  | 2.8 | 2.9  | 1.6  | CRY2   | Homo sapiens cryptochrome 2 (photolyase-like) (CRY2), transcript variant 1, mRNA [NM_021117] | 1408 |
| A_23_P306755 | -2.2 | 1.6 | -1.9 | 2.5  | CRYAA  | Homo sapiens crystallin, alpha A (CRYAA), mRNA [NM_000394]                                   | 1409 |
| A_24_P206776 | -2.1 | 2.3 | 2.2  | 2.0  | CRYAB  | Homo sapiens crystallin, alpha B (CRYAB), mRNA [NM_001885]                                   | 1410 |
| A_23_P165457 | 9.5  | 6.6 | 9.1  | -5.3 | CRYBA2 | Homo sapiens crystallin, beta A2 (CRYBA2), transcript variant 1, mRNA [NM_005209]            | 1412 |
| A_23_P425066 | 1.0  | 1.4 | -1.4 | -2.8 | CRYBB2 | Homo sapiens crystallin, beta B2 (CRYBB2), mRNA [NM_000496]                                  | 1415 |

|              |      |      |      |      |          |                                                                                                            |      |
|--------------|------|------|------|------|----------|------------------------------------------------------------------------------------------------------------|------|
| A_24_P823219 | 4.9  | 3.2  | 2.4  | 3.7  | CRYBB2P1 | Homo sapiens crystallin, beta B2 pseudogene 1 (CRYBB2P1), transcript variant 1, non-coding RNA [NR_033733] | 1416 |
| A_23_P29179  | 3.0  | 3.3  | -1.6 | 2.5  | CRYBB3   | Homo sapiens crystallin, beta B3 (CRYBB3), mRNA [NM_004076]                                                | 1417 |
| A_23_P165380 | -8.1 | -1.3 | -1.1 | -1.8 | CRYGA    | Homo sapiens crystallin, gamma A (CRYGA), mRNA [NM_014617]                                                 | 1418 |
| A_23_P414842 | 3.2  | 3.1  | 2.9  | 11.1 | CRYGB    | Homo sapiens crystallin, gamma B (CRYGB), mRNA [NM_005210]                                                 | 1419 |

|              |      |      |      |      |       |                                                                                                         |      |
|--------------|------|------|------|------|-------|---------------------------------------------------------------------------------------------------------|------|
| A_23_P320705 | -2.6 | 1.2  | 1.1  | -2.0 | CRYGD | Homo sapiens crystallin, gamma D, mRNA (cDNA clone MGC:150947 IMAGE:40125889), complete cds. [BC117338] | 1421 |
| A_23_P131215 | 1.1  | 1.3  | -1.4 | -2.6 | CRYGD | Homo sapiens crystallin, gamma D (CRYGD), mRNA [NM_006891]                                              | 1421 |
| A_23_P132738 | 1.1  | 1.1  | -2.2 | -1.2 | CRYGS | Homo sapiens crystallin, gamma S (CRYGS), mRNA [NM_017541]                                              | 1427 |
| A_23_P77731  | -6.4 | -1.7 | -2.1 | -2.0 | CRYM  | Homo sapiens crystallin, mu (CRYM), transcript variant 1, mRNA [NM_001888]                              | 1428 |

|              |      |      |      |      |        |                                                                                                  |        |
|--------------|------|------|------|------|--------|--------------------------------------------------------------------------------------------------|--------|
| A_23_P114662 | 1.0  | -1.0 | -1.6 | -2.0 | CRYZ   | Homo sapiens crystallin, zeta (quinone reductase) (CRYZ), transcript variant 2, mRNA [NM_001889] | 1429   |
| A_24_P408341 | 2.0  | 1.7  | 1.3  | 2.0  | CRYZL1 | crystallin, zeta (quinone reductase)-like 1 [Source:HGNC Symbol;Acc:2420] [ENST00000452332]      | 9946   |
| A_24_P79529  | -2.5 | 1.4  | -1.1 | -5.5 | CSAG2  | Homo sapiens CSAG family, member 2 (CSAG2), transcript variant 1, mRNA [NM_001080848]            | 728461 |
| A_23_P25224  | 1.2  | 2.3  | 1.4  | -1.1 | CSDA   | Homo sapiens cold shock domain protein A (CSDA), transcript variant 1, mRNA [NM_003651]          | 8531   |

|              |      |      |      |      |       |                                                                                                              |       |
|--------------|------|------|------|------|-------|--------------------------------------------------------------------------------------------------------------|-------|
| A_24_P625382 | 3.1  | 2.5  | -1.2 | 1.2  | CSDA  | Homo sapiens cold shock domain protein A (CSDA), transcript variant 1, mRNA [NM_003651]                      | 8531  |
| A_24_P177279 | 1.8  | 2.2  | 1.4  | 1.3  | CSDC2 | Homo sapiens cold shock domain containing C2, RNA binding (CSDC2), mRNA [NM_014460]                          | 27254 |
| A_23_P74595  | -1.0 | 2.3  | 1.1  | 1.4  | CSDE1 | Homo sapiens cold shock domain containing E1, RNA-binding (CSDE1), transcript variant 1, mRNA [NM_001007553] | 7812  |
| A_23_P17393  | -2.9 | -4.3 | -1.1 | -1.3 | CSE1L | Homo sapiens CSE1 chromosome segregation 1-like (yeast) (CSE1L), mRNA [NM_001316]                            | 1434  |

|              |      |      |      |      |      |                                                                                                       |      |
|--------------|------|------|------|------|------|-------------------------------------------------------------------------------------------------------|------|
| A_23_P407012 | 1.8  | -4.6 | 1.1  | -1.3 | CSF1 | Homo sapiens colony stimulating factor 1 (macrophage) (CSF1), transcript variant 2, mRNA [NM_172210]  | 1435 |
| A_23_P133408 | 3.8  | 4.8  | 3.2  | 2.2  | CSF2 | Homo sapiens colony stimulating factor 2 (granulocyte-macrophage) (CSF2), mRNA [NM_000758]            | 1437 |
| A_23_P501754 | -2.7 | -2.6 | -2.9 | -3.0 | CSF3 | Homo sapiens colony stimulating factor 3 (granulocyte) (CSF3), transcript variant 1, mRNA [NM_000759] | 1440 |

|              |      |      |      |      |            |                                                                                                                            |       |
|--------------|------|------|------|------|------------|----------------------------------------------------------------------------------------------------------------------------|-------|
| A_23_P126218 | 1.1  | 1.3  | -6.6 | -2.2 | CSF3R      | Homo sapiens colony stimulating factor 3 receptor (granulocyte) (CSF3R), transcript variant 4, mRNA [NM_172313]            | 1441  |
| A_23_P134835 | -1.9 | -1.8 | -2.4 | -3.8 | CSGALNACT1 | Homo sapiens chondroitin sulfate N-acetylgalactosaminyl transferase 1 (CSGALNACT1), transcript variant 2, mRNA [NM_018371] | 55790 |
| A_23_P161269 | 1.9  | -1.1 | 1.9  | 2.6  | CSGALNACT2 | Homo sapiens chondroitin sulfate N-acetylgalactosaminyl transferase 2 (CSGALNACT2), mRNA [NM_018590]                       | 55454 |



|              |      |      |      |      |      |                                                                                               |      |
|--------------|------|------|------|------|------|-----------------------------------------------------------------------------------------------|------|
| A_24_P211044 | 2.5  | 3.0  | 2.6  | -1.0 | CSH1 | Homo sapiens chorionic somatomotropin hormone 1 (placental lactogen) (CSH1), mRNA [NM_001317] | 1442 |
| A_23_P381351 | 1.0  | -4.1 | -1.0 | -1.0 | CSH1 | Homo sapiens chorionic somatomotropin hormone 1 (placental lactogen) (CSH1), mRNA [NM_001317] | 1442 |
| A_23_P207170 | -1.6 | 2.1  | 1.2  | 1.1  | CSH1 | Homo sapiens chorionic somatomotropin hormone 1 (placental lactogen) (CSH1), mRNA [NM_001317] | 1442 |

|              |     |     |     |     |          |                                                                                                         |        |
|--------------|-----|-----|-----|-----|----------|---------------------------------------------------------------------------------------------------------|--------|
| A_23_P207154 | 1.5 | 1.5 | 1.9 | 3.8 | CSH2     | Homo sapiens chorionic somatomammotropin hormone 2 (CSH2), transcript variant 2, mRNA [NM_022644]       | 1443   |
| A_23_P207180 | 2.8 | 2.3 | 2.1 | 2.1 | CSHL1    | Homo sapiens chorionic somatomammotropin hormone-like 1 (CSHL1), transcript variant 2, mRNA [NM_022581] | 1444   |
| A_23_P152024 | 1.9 | 2.2 | 2.0 | 2.4 | CSK      | Homo sapiens c-src tyrosine kinase (CSK), transcript variant 1, mRNA [NM_004383]                        | 1445   |
| A_24_P338788 | 1.4 | 2.2 | 1.3 | 1.0 | CSNK1A1L | Homo sapiens casein kinase 1, alpha 1-like (CSNK1A1L), mRNA [NM_145203]                                 | 122011 |

|              |      |      |      |     |           |                                                                                            |        |
|--------------|------|------|------|-----|-----------|--------------------------------------------------------------------------------------------|--------|
| A_32_P68408  | 1.1  | -1.0 | -2.6 | 1.3 | CSNK1A1P1 | Homo sapiens casein kinase 1, alpha 1 pseudogene 1 (CSNK1A1P1), non-coding RNA [NR_027320] | 161635 |
| A_23_P29263  | -3.0 | 1.1  | 1.3  | 1.3 | CSNK1E    | Homo sapiens casein kinase 1, epsilon (CSNK1E), transcript variant 1, mRNA [NM_152221]     | 1454   |
| A_23_P252636 | 1.2  | 2.0  | 2.8  | 1.9 | CSNK1G1   | Homo sapiens casein kinase 1, gamma 1 (CSNK1G1), mRNA [NM_022048]                          | 53944  |
| A_24_P99963  | 6.1  | 1.1  | 6.4  | 5.9 | CSNK1G2   | Homo sapiens casein kinase 1, gamma 2 (CSNK1G2), mRNA [NM_001319]                          | 1455   |

|             |     |      |     |      |          |                                                                                                               |        |
|-------------|-----|------|-----|------|----------|---------------------------------------------------------------------------------------------------------------|--------|
| A_23_P56140 | 9.2 | 10.4 | 6.0 | 6.3  | CSNK1G2  | Homo sapiens casein kinase 1, gamma 2 (CSNK1G2), mRNA [NM_001319]                                             | 1455   |
| A_23_P14915 | 1.7 | 2.5  | 1.5 | -1.4 | CSNK2A2  | Homo sapiens casein kinase 2, alpha prime polypeptide (CSNK2A2), mRNA [NM_001896]                             | 1459   |
| A_23_P73870 | 1.7 | 1.0  | 2.4 | -1.0 | CSPG4P1Y | Homo sapiens chondroitin sulfate proteoglycan 4 pseudogene 1, Y-linked (CSPG4P1Y), non-coding RNA [NR_001554] | 114758 |

|              |      |      |      |      |        |                                                                                                                 |       |
|--------------|------|------|------|------|--------|-----------------------------------------------------------------------------------------------------------------|-------|
| A_24_P342944 | 4.3  | -1.3 | 1.5  | 4.0  | CSPG5  | Homo sapiens chondroitin sulfate proteoglycan 5 (neuroglycan C) (CSPG5), transcript variant 1, mRNA [NM_006574] | 10675 |
| A_23_P169558 | -3.7 | -1.0 | -2.4 | -1.0 | CSPP1  | Homo sapiens centrosome and spindle pole associated protein 1 (CSPP1), mRNA [NM_024790]                         | 79848 |
| A_23_P121011 | 1.8  | 1.1  | -6.7 | 1.5  | CSRNP1 | Homo sapiens cysteine-serine-rich nuclear protein 1 (CSRNP1), mRNA [NM_033027]                                  | 64651 |

|              |     |      |      |      |        |                                                                                                      |       |
|--------------|-----|------|------|------|--------|------------------------------------------------------------------------------------------------------|-------|
| A_23_P151209 | 3.7 | -1.3 | 1.2  | 2.9  | CSRNP2 | Homo sapiens cysteine-serine-rich nuclear protein 2 (CSRNP2), transcript variant 1, mRNA [NM_030809] | 81566 |
| A_24_P225448 | 1.0 | -1.1 | -1.2 | 2.0  | CSRP1  | Homo sapiens cysteine and glycine-rich protein 1 (CSRP1), transcript variant 1, mRNA [NM_004078]     | 1465  |
| A_23_P44724  | 1.0 | -2.3 | -5.2 | -1.3 | CSRP2  | Homo sapiens cysteine and glycine-rich protein 2 (CSRP2), mRNA [NM_001321]                           | 1466  |
| A_24_P237175 | 2.3 | 4.3  | 2.9  | 1.5  | CST2   | Homo sapiens cystatin SA (CST2), mRNA [NM_001322]                                                    | 1470  |

|              |      |      |      |       |      |                                                                |        |
|--------------|------|------|------|-------|------|----------------------------------------------------------------|--------|
| A_24_P216294 | 3.0  | -1.2 | 2.7  | 1.1   | CST3 | Homo sapiens cystatin C (CST3), mRNA [NM_000099]               | 1471   |
| A_23_P170453 | -3.4 | 1.2  | -1.0 | 1.0   | CST5 | Homo sapiens cystatin D (CST5), mRNA [NM_001900]               | 1473   |
| A_23_P146946 | -1.0 | 1.5  | -3.0 | -1.1  | CST6 | Homo sapiens cystatin E/M (CST6), mRNA [NM_001323]             | 1474   |
| A_32_P81879  | 1.0  | -1.0 | -7.3 | -71.4 | CST9 | Homo sapiens cystatin 9 (testatin) (CST9), mRNA [NM_001008693] | 128822 |
| A_23_P154894 | -5.6 | -1.0 | -1.1 | 1.5   | CSTB | Homo sapiens cystatin B (stefin B) (CSTB), mRNA [NM_000100]    | 1476   |

|              |      |      |      |      |         |                                                                                                                |        |
|--------------|------|------|------|------|---------|----------------------------------------------------------------------------------------------------------------|--------|
| A_24_P941051 | -2.0 | -1.7 | -1.8 | -2.1 | CSTF2T  | Homo sapiens cleavage stimulation factor, 3' pre-RNA, subunit 2, 64kDa, tau variant (CSTF2T), mRNA [NM_015235] | 23283  |
| A_32_P207124 | 2.7  | -1.3 | 1.4  | 2.9  | CT47A11 | Homo sapiens cancer/testis antigen family 47, member A11 (CT47A11), mRNA [NM_173571]                           | 255313 |
| A_23_P22696  | 1.3  | 1.0  | -2.2 | 1.1  | CTAG2   | Homo sapiens cancer/testis antigen 2 (CTAG2), transcript variant 2, mRNA [NM_020994]                           | 30848  |



|              |     |      |      |      |         |                                                                                       |        |
|--------------|-----|------|------|------|---------|---------------------------------------------------------------------------------------|--------|
| A_23_P128773 | 1.0 | -2.3 | -1.1 | -1.1 | CTAGE5  | Homo sapiens CTAGE family, member 5 (CTAGE5), transcript variant 4, mRNA [NM_203356]  | 4253   |
| A_32_P116840 | 1.0 | 1.0  | 1.0  | -2.2 | CTAGE5  | Homo sapiens CTAGE family, member 5 (CTAGE5), transcript variant 4, mRNA [NM_203356]  | 4253   |
| A_23_P348936 | 2.0 | 2.1  | 2.1  | 1.0  | CTAGE7P | Homo sapiens CTAGE family, member 7, pseudogene (CTAGE7P), non-coding RNA [NR_044994] | 119437 |
| A_32_P167856 | 1.1 | -1.1 | 1.4  | -3.1 | CTAGE9  | Homo sapiens CTAGE family, member 9 (CTAGE9), mRNA [NM_001145659]                     | 643854 |

|              |      |      |      |      |       |                                                                                              |      |
|--------------|------|------|------|------|-------|----------------------------------------------------------------------------------------------|------|
| A_32_P118655 | 1.1  | -8.7 | -1.3 | -1.4 | CTBP1 | Homo sapiens mRNA; cDNA DKFZp434B0914 (from clone DKFZp434B0914). [AL137653]                 | 1487 |
| A_23_P41286  | 3.1  | 3.4  | 2.9  | 2.6  | CTBP1 | Homo sapiens C-terminal binding protein 1 (CTBP1), transcript variant 2, mRNA [NM_001012614] | 1487 |
| A_32_P144708 | -1.3 | -2.9 | -1.5 | -1.4 | CTBP2 | Homo sapiens C-terminal binding protein 2 (CTBP2), transcript variant 2, mRNA [NM_022802]    | 1488 |
| A_24_P103922 | 2.8  | 4.6  | 2.1  | 2.0  | CTBP2 | Homo sapiens C-terminal binding protein 2 (CTBP2), transcript variant 1, mRNA [NM_001329]    | 1488 |

|              |      |      |      |      |      |                                                                                                        |       |
|--------------|------|------|------|------|------|--------------------------------------------------------------------------------------------------------|-------|
| A_23_P78191  | -1.0 | -1.0 | -2.4 | -1.0 | CTC1 | Homo sapiens CTS telomere maintenance complex component 1 (CTC1), mRNA [NM_025099]                     | 80169 |
| A_24_P347704 | -3.6 | -1.2 | -1.3 | -1.3 | CTCF | Homo sapiens CCCTC-binding factor (zinc finger protein) (CTCF), transcript variant 1, mRNA [NM_006565] | 10664 |
| A_24_P356254 | 13.6 | 21.6 | 7.9  | 11.0 | CTCF | Homo sapiens CCCTC-binding factor (zinc finger protein) (CTCF), transcript variant 1, mRNA [NM_006565] | 10664 |

|              |      |      |      |      |        |                                                                                                                                                     |       |
|--------------|------|------|------|------|--------|-----------------------------------------------------------------------------------------------------------------------------------------------------|-------|
| A_23_P101111 | 2.1  | 1.5  | 1.9  | 1.0  | CTDP1  | Homo sapiens CTD (carboxy-terminal domain, RNA polymerase II, polypeptide A) phosphatase, subunit 1 (CTDP1), transcript variant 1, mRNA [NM_004715] | 9150  |
| A_24_P97197  | -5.1 | -2.6 | -3.7 | -4.6 | CTDSP1 | Homo sapiens CTD (carboxy-terminal domain, RNA polymerase II, polypeptide A) small phosphatase 1 (CTDSP1), transcript variant 2, mRNA [NM_182642]   | 58190 |

|              |      |      |      |      |        |                                                                                                                                                         |       |
|--------------|------|------|------|------|--------|---------------------------------------------------------------------------------------------------------------------------------------------------------|-------|
| A_23_P28263  | 4.3  | 1.7  | 3.9  | 2.1  | CTDSP1 | Homo sapiens CTD (carboxy-terminal domain, RNA polymerase II, polypeptide A) small phosphatase 1 (CTDSP1), transcript variant 1, mRNA [NM_021198]       | 58190 |
| A_23_P212436 | -4.7 | -4.9 | -5.1 | -4.8 | CTDSPL | Homo sapiens CTD (carboxy-terminal domain, RNA polymerase II, polypeptide A) small phosphatase-like (CTDSPL), transcript variant 1, mRNA [NM_001008392] | 10217 |

|              |      |      |      |      |         |                                                                                                                                   |        |
|--------------|------|------|------|------|---------|-----------------------------------------------------------------------------------------------------------------------------------|--------|
| A_32_P76060  | -1.2 | 1.5  | -2.6 | -2.3 | CTDSPL2 | Homo sapiens CTD (carboxy-terminal domain, RNA polymerase II, polypeptide A) small phosphatase like 2 (CTDSPL2), mRNA [NM_016396] | 51496  |
| A_23_P111888 | 1.0  | -1.0 | -4.7 | -1.5 | CTHRC1  | Homo sapiens collagen triple helix repeat containing 1 (CTHRC1), mRNA [NM_138455]                                                 | 115908 |
| A_23_P102481 | 1.4  | 2.9  | 1.6  | -1.2 | CTLA4   | Homo sapiens cytotoxic T-lymphocyte-associated protein 4 (CTLA4), transcript variant 1, mRNA [NM_005214]                          | 1493   |

|             |      |      |      |      |        |                                                                                                                  |      |
|-------------|------|------|------|------|--------|------------------------------------------------------------------------------------------------------------------|------|
| A_23_P58647 | -2.9 | 2.5  | -1.1 | -1.2 | CTNNA1 | Homo sapiens catenin (cadherin-associated protein), alpha 1, 102kDa (CTNNA1), mRNA [NM_001903]                   | 1495 |
| A_23_P84736 | -1.6 | -1.6 | -2.7 | -1.8 | CTNNA2 | Homo sapiens catenin (cadherin-associated protein), alpha 2 (CTNNA2), transcript variant 1, mRNA [NM_004389]     | 1496 |
| A_23_P95080 | 2.3  | 1.5  | 3.1  | 1.9  | CTNND1 | Homo sapiens catenin (cadherin-associated protein), delta 1 (CTNND1), transcript variant 16, mRNA [NM_001206885] | 1500 |

|             |      |      |      |      |       |                                                                              |        |
|-------------|------|------|------|------|-------|------------------------------------------------------------------------------|--------|
| A_23_P10305 | -2.0 | -2.3 | -3.2 | -1.8 | CTPS2 | Homo sapiens CTP synthase II (CTPS2), transcript variant 2, mRNA [NM_175859] | 56474  |
| A_32_P86150 | 2.3  | 1.5  | 2.0  | 2.6  | CTRB2 | Homo sapiens chymotrypsinogen B2 (CTRB2), mRNA [NM_001025200]                | 440387 |
| A_23_P34852 | 1.5  | 1.2  | -2.2 | -1.0 | CTRC  | Homo sapiens chymotrypsin C (caldecrin) (CTRC), mRNA [NM_007272]             | 11330  |
| A_24_P74374 | -2.1 | 3.3  | 2.9  | 2.3  | CTSA  | Homo sapiens cathepsin A (CTSA), transcript variant 1, mRNA [NM_000308]      | 5476   |
| A_24_P74371 | 3.5  | 2.9  | 2.2  | 2.1  | CTSA  | Homo sapiens cathepsin A (CTSA), transcript variant 1, mRNA [NM_000308]      | 5476   |



|              |      |       |     |       |      |                                                                         |      |
|--------------|------|-------|-----|-------|------|-------------------------------------------------------------------------|------|
| A_24_P303770 | 2.5  | 7.4   | 2.4 | -2.0  | CTSB | Homo sapiens cathepsin B (CTSB), transcript variant 2, mRNA [NM_147780] | 1508 |
| A_23_P215944 | -1.3 | -18.7 | 1.5 | -10.2 | CTSB | Homo sapiens cathepsin B (CTSB), transcript variant 2, mRNA [NM_147780] | 1508 |
| A_23_P1552   | 4.8  | 7.1   | 4.4 | 5.5   | CTSC | Homo sapiens cathepsin C (CTSC), transcript variant 1, mRNA [NM_001814] | 1075 |
| A_23_P52556  | 2.0  | 1.7   | 1.1 | 1.3   | CTSD | Homo sapiens cathepsin D (CTSD), mRNA [NM_001909]                       | 1509 |
| A_23_P10291  | -1.1 | 2.7   | 2.6 | 2.8   | CTSE | Homo sapiens cathepsin E (CTSE), transcript variant 1, mRNA [NM_001910] | 1510 |

|              |      |      |      |      |           |                                                                           |       |
|--------------|------|------|------|------|-----------|---------------------------------------------------------------------------|-------|
| A_23_P34744  | 1.8  | 1.3  | 1.2  | 2.1  | CTSK      | Homo sapiens cathepsin K (CTSK), mRNA [NM_000396]                         | 1513  |
| A_23_P146456 | -1.9 | -2.0 | -3.0 | -2.0 | CTSL2     | Homo sapiens cathepsin L2 (CTSL2), transcript variant 1, mRNA [NM_001333] | 1515  |
| A_23_P13031  | 5.8  | 1.8  | 3.5  | 4.1  | CTSW      | Homo sapiens cathepsin W (CTSW), mRNA [NM_001335]                         | 1521  |
| A_24_P353740 | 1.3  | 2.5  | -1.1 | 2.7  | CTTNBP2NL | Homo sapiens CTTNBP2 N-terminal like (CTTNBP2 NL), mRNA [NM_018704]       | 55917 |

|              |      |     |      |      |       |                                                                                                                     |        |
|--------------|------|-----|------|------|-------|---------------------------------------------------------------------------------------------------------------------|--------|
| A_24_P118247 | -1.7 | 2.5 | 1.5  | -1.6 | CTU2  | Homo sapiens cytosolic thiouridylase subunit 2 homolog (S. pombe) (CTU2), transcript variant 2, mRNA [NM_001012762] | 348180 |
| A_32_P155016 | -1.7 | 1.4 | -2.2 | -1.0 | CTXN1 | Homo sapiens cortixin 1 (CTXN1), mRNA [NM_206833]                                                                   | 404217 |
| A_24_P303589 | 3.4  | 6.3 | -1.1 | 3.0  | CUL1  | Homo sapiens cullin 1 (CUL1), mRNA [NM_003592]                                                                      | 8454   |
| A_24_P252794 | 1.0  | 1.0 | -1.5 | -2.9 | CUL2  | Homo sapiens cullin 2 (CUL2), transcript variant 3, mRNA [NM_003591]                                                | 8453   |
| A_24_P140030 | 4.6  | 1.7 | 1.2  | -3.4 | CUL3  | Homo sapiens cullin 3 (CUL3), mRNA [NM_003590]                                                                      | 8452   |

|              |      |      |      |      |       |                                                                                            |       |
|--------------|------|------|------|------|-------|--------------------------------------------------------------------------------------------|-------|
| A_23_P151471 | -2.3 | -2.3 | -1.4 | -1.9 | CUL4A | Homo sapiens cullin 4A (CUL4A), transcript variant 1, mRNA [NM_001008895]                  | 8451  |
| A_24_P61467  | 1.0  | 3.5  | -1.1 | -1.1 | CUL4A | Homo sapiens cullin 4A (CUL4A), transcript variant 1, mRNA [NM_001008895]                  | 8451  |
| A_32_P134167 | 2.2  | 2.2  | 2.0  | 1.3  | CUL5  | 60229971 2F1 NIH_MGC_87 Homo sapiens cDNA clone IMAGE:4394138 5', mRNA sequence [BG031574] | 8065  |
| A_23_P203009 | -1.4 | -2.5 | -1.4 | -1.4 | CUL5  | Homo sapiens cullin 5 (CUL5), mRNA [NM_003478]                                             | 8065  |
| A_23_P311740 | 1.4  | -1.5 | 2.1  | -1.3 | CUL9  | Homo sapiens cullin 9 (CUL9), mRNA [NM_015089]                                             | 23113 |

|              |       |      |      |      |      |                                                                                                              |       |
|--------------|-------|------|------|------|------|--------------------------------------------------------------------------------------------------------------|-------|
| A_23_P214678 | 2.5   | 2.0  | 2.1  | 1.1  | CUTA | Homo sapiens cutA divalent cation tolerance homolog (E. coli) (CUTA), transcript variant 2, mRNA [NM_015921] | 51596 |
| A_23_P98015  | -1.3  | -2.3 | -1.5 | -1.2 | CUTC | Homo sapiens cutC copper transporter homolog (E. coli) (CUTC), mRNA [NM_015960]                              | 51076 |
| A_24_P691604 | -13.9 | -1.0 | 1.0  | -1.0 | CUX1 | Homo sapiens cut-like homeobox 1 (CUX1), transcript variant 4, mRNA [NM_001202543]                           | 1523  |

|              |      |     |      |      |         |                                                                                                    |        |
|--------------|------|-----|------|------|---------|----------------------------------------------------------------------------------------------------|--------|
| A_23_P47058  | 2.0  | 1.2 | -1.0 | 1.8  | CUZD1   | Homo sapiens CUB and zona pellucida-like domains 1 (CUZD1), transcript variant 1, mRNA [NM_022034] | 50624  |
| A_24_P163845 | 2.1  | 2.0 | 1.9  | -2.8 | CWF19L1 | Homo sapiens CWF19-like 1, cell cycle control (S. pombe) (CWF19L1), mRNA [NM_018294]               | 55280  |
| A_23_P35354  | 2.1  | 2.8 | 2.3  | 1.5  | CWF19L1 | Homo sapiens CWF19-like 1, cell cycle control (S. pombe) (CWF19L1), mRNA [NM_018294]               | 55280  |
| A_23_P161719 | -2.4 | 1.4 | -3.4 | -1.1 | CWF19L2 | Homo sapiens CWF19-like 2, cell cycle control (S. pombe) (CWF19L2), mRNA [NM_152434]               | 143884 |

|              |      |      |      |      |        |                                                                                                                       |      |
|--------------|------|------|------|------|--------|-----------------------------------------------------------------------------------------------------------------------|------|
| A_24_P381901 | -1.6 | -1.2 | -6.7 | -1.1 | CX3CL1 | Homo sapiens chemokine (C-X3-C motif) ligand 1 (CX3CL1), mRNA [NM_002996]                                             | 6376 |
| A_24_P374943 | -9.4 | 1.0  | 1.1  | 1.0  | CXADR  | Homo sapiens coxsackievirus and adenovirus receptor (CXADR), transcript variant 1, mRNA [NM_001338]                   | 1525 |
| A_23_P7144   | -1.2 | -3.2 | -1.2 | -1.2 | CXCL1  | Homo sapiens chemokine (C-X-C motif) ligand 1 (melanoma growth stimulating activity, alpha) (CXCL1), mRNA [NM_001511] | 2919 |
| A_24_P944054 | -1.0 | 1.9  | 2.6  | 1.5  | CXCL12 | Homo sapiens mRNA for FLJ00404 protein. [AK090482]                                                                    | 6387 |

|              |      |      |      |      |        |                                                                                                 |       |
|--------------|------|------|------|------|--------|-------------------------------------------------------------------------------------------------|-------|
| A_24_P412156 | 1.0  | -4.6 | -1.0 | -1.9 | CXCL12 | Homo sapiens chemokine (C-X-C motif) ligand 12 (CXCL12), transcript variant 2, mRNA [NM_000609] | 6387  |
| A_23_P121695 | -1.1 | -2.5 | -1.1 | -1.0 | CXCL13 | Homo sapiens chemokine (C-X-C motif) ligand 13 (CXCL13), mRNA [NM_006419]                       | 10563 |
| A_23_P38505  | -1.1 | 1.8  | -1.4 | -3.4 | CXCL16 | Homo sapiens chemokine (C-X-C motif) ligand 16 (CXCL16), transcript variant 1, mRNA [NM_022059] | 58191 |
| A_24_P257416 | 1.6  | 2.3  | 2.3  | 1.1  | CXCL2  | Homo sapiens chemokine (C-X-C motif) ligand 2 (CXCL2), mRNA [NM_002089]                         | 2920  |



|              |      |      |       |      |       |                                                                                                 |      |
|--------------|------|------|-------|------|-------|-------------------------------------------------------------------------------------------------|------|
| A_24_P251764 | 1.5  | 2.4  | 2.6   | -1.0 | CXCL3 | Homo sapiens chemokine (C-X-C motif) ligand 3 (CXCL3), mRNA [NM_002090]                         | 2921 |
| A_23_P18452  | -1.4 | -1.4 | -2.0  | -1.7 | CXCL9 | Homo sapiens chemokine (C-X-C motif) ligand 9 (CXCL9), mRNA [NM_002416]                         | 4283 |
| A_24_P252945 | -1.0 | -1.0 | -25.4 | -1.0 | CXCR5 | Homo sapiens chemokine (C-X-C motif) receptor 5 (CXCR5), transcript variant 2, mRNA [NM_032966] | 643  |
| A_23_P203215 | 4.8  | 1.0  | -1.6  | 2.0  | CXCR5 | Homo sapiens chemokine (C-X-C motif) receptor 5 (CXCR5), transcript variant 2, mRNA [NM_032966] | 643  |

|              |      |      |      |      |          |                                                                                                      |        |
|--------------|------|------|------|------|----------|------------------------------------------------------------------------------------------------------|--------|
| A_23_P141779 | 2.4  | 1.7  | 1.5  | 2.1  | CXXC1    | Homo sapiens CXXC finger protein 1 (CXXC1), transcript variant 2, mRNA [NM_014593]                   | 30827  |
| A_24_P930062 | -1.6 | 1.1  | -1.1 | -7.0 | CXXC5    | Homo sapiens CXXC finger protein 5 (CXXC5), mRNA [NM_016463]                                         | 51523  |
| A_23_P399001 | 1.8  | 2.3  | -2.1 | -1.8 | CXXC5    | Homo sapiens CXXC finger protein 5 (CXXC5), mRNA [NM_016463]                                         | 51523  |
| A_24_P348885 | 2.0  | -2.2 | 1.7  | -1.0 | CYB561D1 | Homo sapiens cytochrome b-561 domain containing 1 (CYB561D1), transcript variant 2, mRNA [NM_182580] | 284613 |

|              |      |      |      |       |          |                                                                                                |       |
|--------------|------|------|------|-------|----------|------------------------------------------------------------------------------------------------|-------|
| A_23_P121326 | -2.4 | 1.0  | 2.0  | 1.1   | CYB561D2 | Homo sapiens cytochrome b-561 domain containing 2 (CYB561D2), mRNA [NM_007022]                 | 11068 |
| A_23_P101208 | 5.1  | 1.3  | 3.5  | -1.2  | CYB5A    | Homo sapiens cytochrome b5 type A (microsomal) (CYB5A), transcript variant 2, mRNA [NM_001914] | 1528  |
| A_23_P52101  | 1.1  | -2.1 | -1.7 | 1.5   | CYB5R1   | Homo sapiens cytochrome b5 reductase 1 (CYB5R1), mRNA [NM_016243]                              | 51706 |
| A_24_P100277 | -1.1 | 1.4  | -2.1 | -19.7 | CYB5R3   | Homo sapiens cytochrome b5 reductase 3 (CYB5R3), transcript variant 2, mRNA [NM_007326]        | 1727  |

|              |     |      |      |      |        |                                                                                                   |       |
|--------------|-----|------|------|------|--------|---------------------------------------------------------------------------------------------------|-------|
| A_23_P163506 | 2.4 | 1.1  | 1.5  | 1.4  | CYBA   | Homo sapiens cytochrome b-245, alpha polypeptide (CYBA), mRNA [NM_000101]                         | 1535  |
| A_23_P209564 | 1.4 | 2.8  | -1.0 | -1.1 | CYBRD1 | Homo sapiens cytochrome b reductase 1 (CYBRD1), transcript variant 1, mRNA [NM_024843]            | 79901 |
| A_23_P20980  | 1.1 | -1.4 | -2.8 | -1.0 | CYC1   | Homo sapiens cytochrome c-1 (CYC1), nuclear gene encoding mitochondrial protein, mRNA [NM_001916] | 1537  |

|              |      |      |       |      |        |                                                                                                          |       |
|--------------|------|------|-------|------|--------|----------------------------------------------------------------------------------------------------------|-------|
| A_24_P29665  | -7.3 | -5.4 | -10.4 | -5.1 | CYCS   | Homo sapiens cytochrome c, somatic (CYCS), nuclear gene encoding mitochondrial protein, mRNA [NM_018947] | 54205 |
| A_23_P156117 | 5.7  | 2.9  | 1.7   | 2.8  | CYFIP2 | Homo sapiens cytoplasmic FMR1 interacting protein 2 (CYFIP2), transcript variant 2, mRNA [NM_001037332]  | 26999 |
| A_23_P123555 | -1.0 | 1.8  | 2.3   | -1.1 | CYHR1  | Homo sapiens cysteine/histidine-rich 1 (CYHR1), transcript variant 2, mRNA [NM_032687]                   | 50626 |

|              |      |      |      |      |       |                                                                                                     |       |
|--------------|------|------|------|------|-------|-----------------------------------------------------------------------------------------------------|-------|
| A_24_P89843  | 1.1  | -2.3 | 1.3  | 1.1  | CYHR1 | Homo sapiens cysteine/histidine-rich 1 (CYHR1), transcript variant 2, mRNA [NM_032687]              | 50626 |
| A_23_P398197 | -4.9 | -1.0 | -1.0 | -1.0 | CYLC1 | Homo sapiens cylicin, basic protein of sperm head cytoskeleton 1 (CYLC1), mRNA [NM_021118]          | 1538  |
| A_24_P48078  | -1.0 | 1.4  | 1.7  | 2.4  | CYLD  | Homo sapiens cylindromatosis (turban tumor syndrome) (CYLD), transcript variant 1, mRNA [NM_015247] | 1540  |

|              |     |     |      |      |         |                                                                                                                                                                    |      |
|--------------|-----|-----|------|------|---------|--------------------------------------------------------------------------------------------------------------------------------------------------------------------|------|
| A_32_P209325 | 2.8 | 4.1 | -1.5 | -1.3 | CYP11A1 | cytochrome P450, family 11, subfamily A, polypeptide 1 [Source:HGNC Symbol;Acc:2590] [ENST00000467407]                                                             | 1583 |
| A_23_P168928 | 2.1 | 2.1 | 1.0  | -1.0 | CYP11B1 | Homo sapiens cytochrome P450, family 11, subfamily B, polypeptide 1 (CYP11B1), nuclear gene encoding mitochondrial protein, transcript variant 1, mRNA [NM_000497] | 1584 |

|              |      |      |      |      |         |                                                                                                                                                                    |      |
|--------------|------|------|------|------|---------|--------------------------------------------------------------------------------------------------------------------------------------------------------------------|------|
| A_24_P329424 | -1.0 | -2.1 | -1.0 | -1.1 | CYP11B1 | Homo sapiens cytochrome P450, family 11, subfamily B, polypeptide 1 (CYP11B1), nuclear gene encoding mitochondrial protein, transcript variant 1, mRNA [NM_000497] | 1584 |
| A_23_P206110 | -5.5 | 1.0  | 1.4  | 1.2  | CYP1A2  | Homo sapiens cytochrome P450, family 1, subfamily A, polypeptide 2 (CYP1A2), mRNA [NM_000761]                                                                      | 1544 |
| A_23_P206113 | -1.3 | -2.1 | -1.0 | -2.7 | CYP1A2  | Homo sapiens cytochrome P450, family 1, subfamily A, polypeptide 2 (CYP1A2), mRNA [NM_000761]                                                                      | 1544 |



|              |       |      |      |      |            |                                                                                                   |        |
|--------------|-------|------|------|------|------------|---------------------------------------------------------------------------------------------------|--------|
| A_32_P361884 | -1.4  | -1.6 | -4.2 | -1.8 | CYP1B1-AS1 | Homo sapiens CYP1B1 antisense RNA 1 (non-protein coding) (CYP1B1-AS1), non-coding RNA [NR_027252] | 285154 |
| A_32_P2442   | -2.5  | -1.0 | -1.1 | 1.2  | CYP20A1    | Homo sapiens cytochrome P450, family 20, subfamily A, polypeptide 1 (CYP20A1), mRNA [NM_177538]   | 57404  |
| A_32_P110433 | -31.0 | 1.1  | 1.1  | 1.1  | CYP20A1    | Homo sapiens cytochrome P450, family 20, subfamily A, polypeptide 1 (CYP20A1), mRNA [NM_177538]   | 57404  |

|              |      |      |      |      |         |                                                                                                                       |       |
|--------------|------|------|------|------|---------|-----------------------------------------------------------------------------------------------------------------------|-------|
| A_23_P56894  | -5.2 | -1.7 | -1.7 | -1.5 | CYP20A1 | Homo sapiens cytochrome P450, family 20, subfamily A, polypeptide 1 (CYP20A1), mRNA [NM_177538]                       | 57404 |
| A_23_P257478 | -3.7 | 2.3  | 2.0  | -2.1 | CYP21A2 | Homo sapiens cytochrome P450, family 21, subfamily A, polypeptide 2 (CYP21A2), transcript variant 1, mRNA [NM_000500] | 1589  |
| A_23_P210109 | -1.0 | -2.8 | -1.6 | -1.0 | CYP26B1 | Homo sapiens cytochrome P450, family 26, subfamily B, polypeptide 1 (CYP26B1), mRNA [NM_019885]                       | 56603 |

|              |      |      |      |      |         |                                                                                                                                              |      |
|--------------|------|------|------|------|---------|----------------------------------------------------------------------------------------------------------------------------------------------|------|
| A_23_P131308 | 1.2  | -1.4 | -2.0 | 1.2  | CYP27A1 | Homo sapiens cytochrome P450, family 27, subfamily A, polypeptide 1 (CYP27A1), nuclear gene encoding mitochondrial protein, mRNA [NM_000784] | 1593 |
| A_23_P55779  | 1.4  | 3.0  | -3.0 | 1.9  | CYP2A13 | Homo sapiens cytochrome P450, family 2, subfamily A, polypeptide 13 (CYP2A13), mRNA [NM_000766]                                              | 1553 |
| A_23_P27528  | -7.0 | -1.3 | -3.5 | -2.9 | CYP2A7  | Homo sapiens cytochrome P450, family 2, subfamily A, polypeptide 7 (CYP2A7), transcript variant 1, mRNA [NM_000764]                          | 1549 |

|              |      |      |      |      |         |                                                                                                                     |      |
|--------------|------|------|------|------|---------|---------------------------------------------------------------------------------------------------------------------|------|
| A_23_P158481 | -1.5 | 1.0  | -2.7 | 1.0  | CYP2C19 | Homo sapiens cytochrome P450, family 2, subfamily C, polypeptide 19 (CYP2C19), mRNA [NM_000769]                     | 1557 |
| A_23_P161368 | 1.9  | 2.2  | -1.5 | 1.7  | CYP2C8  | Homo sapiens cytochrome P450, family 2, subfamily C, polypeptide 8 (CYP2C8), transcript variant 1, mRNA [NM_000770] | 1558 |
| A_23_P143734 | 1.1  | -5.5 | 1.2  | -1.9 | CYP2D6  | Homo sapiens cytochrome P450, family 2, subfamily D, polypeptide 6 (CYP2D6), transcript variant 1, mRNA [NM_000106] | 1565 |

|              |      |     |      |      |        |                                                                                                                     |      |
|--------------|------|-----|------|------|--------|---------------------------------------------------------------------------------------------------------------------|------|
| A_23_P155123 | 3.3  | 2.9 | 1.8  | 1.8  | CYP2D6 | Homo sapiens cytochrome P450, family 2, subfamily D, polypeptide 6 (CYP2D6), transcript variant 1, mRNA [NM_000106] | 1565 |
| A_24_P394940 | -2.2 | 1.0 | -2.1 | -1.1 | CYP2E1 | Homo sapiens cytochrome P450, family 2, subfamily E, polypeptide 1 (CYP2E1), mRNA [NM_000773]                       | 1571 |
| A_23_P89981  | 1.8  | 2.3 | 4.0  | 2.3  | CYP2F1 | Homo sapiens cytochrome P450, family 2, subfamily F, polypeptide 1 (CYP2F1), mRNA [NM_000774]                       | 1572 |

|              |       |      |      |      |        |                                                                                                        |        |
|--------------|-------|------|------|------|--------|--------------------------------------------------------------------------------------------------------|--------|
| A_23_P103486 | -21.4 | -1.0 | -1.2 | -1.1 | CYP2J2 | Homo sapiens cytochrome P450, family 2, subfamily J, polypeptide 2 (CYP2J2), mRNA [NM_000775]          | 1573   |
| A_24_P913156 | -1.0  | 3.1  | 2.0  | 2.5  | CYP2U1 | cytochrome P450, family 2, subfamily U, polypeptide 1 [Source:HGNC Symbol;Acc:20582] [ENST00000513302] | 113612 |
| A_23_P155835 | 7.1   | 6.6  | 6.4  | 6.8  | CYP2U1 | Homo sapiens cytochrome P450, family 2, subfamily U, polypeptide 1 (CYP2U1), mRNA [NM_183075]          | 113612 |

|              |      |      |      |      |         |                                                                                                                       |       |
|--------------|------|------|------|------|---------|-----------------------------------------------------------------------------------------------------------------------|-------|
| A_23_P133712 | -1.5 | 4.8  | 1.9  | 1.3  | CYP39A1 | Homo sapiens cytochrome P450, family 39, subfamily A, polypeptide 1 (CYP39A1), mRNA [NM_016593]                       | 51302 |
| A_23_P71258  | -2.0 | -4.5 | -3.9 | -2.5 | CYP3A43 | Homo sapiens cytochrome P450, family 3, subfamily A, polypeptide 43 (CYP3A43), transcript variant 3, mRNA [NM_057096] | 64816 |
| A_23_P215828 | 1.3  | -1.4 | -2.5 | -2.2 | CYP3A43 | Homo sapiens cytochrome P450, family 3, subfamily A, polypeptide 43 (CYP3A43), transcript variant 1, mRNA [NM_022820] | 64816 |

|              |      |      |      |      |         |                                                                                                                        |       |
|--------------|------|------|------|------|---------|------------------------------------------------------------------------------------------------------------------------|-------|
| A_23_P8801   | 3.7  | 3.6  | 6.9  | 3.7  | CYP3A5  | Homo sapiens cytochrome P450, family 3, subfamily A, polypeptide 5 (CYP3A5), transcript variant 1, mRNA [NM_000777]    | 1577  |
| A_24_P916916 | -2.1 | -1.8 | -2.6 | -2.5 | CYP3A5  | Homo sapiens cytochrome P450, family 3, subfamily A, polypeptide 5 (CYP3A5), transcript variant 2, mRNA [NM_001190484] | 1577  |
| A_23_P48784  | 1.3  | 2.4  | 1.2  | 1.1  | CYP46A1 | Homo sapiens cytochrome P450, family 46, subfamily A, polypeptide 1 (CYP46A1), mRNA [NM_006668]                        | 10858 |



|              |      |      |      |     |         |                                                                                                                     |      |
|--------------|------|------|------|-----|---------|---------------------------------------------------------------------------------------------------------------------|------|
| A_23_P97562  | 2.2  | 1.3  | -1.2 | 1.4 | CYP4A11 | CYP4A11= fatty acid omega-hydroxylase [human, kidney, mRNA, 2470 nt]. [S67580]                                      | 1579 |
| A_24_P191013 | -1.3 | -1.4 | -7.2 | 1.1 | CYP4A11 | Homo sapiens cytochrome P450, family 4, subfamily A, polypeptide 11 (CYP4A11), mRNA [NM_000778]                     | 1579 |
| A_23_P114713 | 3.0  | 2.8  | 1.8  | 2.0 | CYP4B1  | Homo sapiens cytochrome P450, family 4, subfamily B, polypeptide 1 (CYP4B1), transcript variant 2, mRNA [NM_000779] | 1580 |

|              |      |      |      |       |          |                                                                                                                        |           |
|--------------|------|------|------|-------|----------|------------------------------------------------------------------------------------------------------------------------|-----------|
| A_24_P168495 | 1.4  | 1.6  | -2.2 | 1.2   | CYP4F2   | Homo sapiens cytochrome P450, family 4, subfamily F, polypeptide 2 (CYP4F2), mRNA [NM_001082]                          | 8529      |
| A_24_P28811  | 1.5  | 1.6  | 1.8  | -10.0 | CYP4F30P | Homo sapiens cytochrome P450, family 4, subfamily F, polypeptide 30, pseudogene (CYP4F30P), non-coding RNA [NR_023391] | 100132708 |
| A_24_P945228 | -1.0 | -6.8 | -1.2 | -1.5  | CYP4V2   | Homo sapiens cytochrome P450, family 4, subfamily V, polypeptide 2 (CYP4V2), mRNA [NM_207352]                          | 285440    |

|              |     |     |      |     |         |                                                                                                                     |        |
|--------------|-----|-----|------|-----|---------|---------------------------------------------------------------------------------------------------------------------|--------|
| A_23_P72411  | 1.4 | 1.0 | -2.6 | 2.2 | CYP4X1  | Homo sapiens cytochrome P450, family 4, subfamily X, polypeptide 1 (CYP4X1), mRNA [NM_178033]                       | 260293 |
| A_23_P103971 | 5.4 | 1.3 | 1.7  | 1.3 | CYP4Z1  | Homo sapiens cytochrome P450, family 4, subfamily Z, polypeptide 1 (CYP4Z1), mRNA [NM_178134]                       | 199974 |
| A_24_P145529 | 2.1 | 2.1 | 2.0  | 1.4 | CYP4Z2P | Homo sapiens cytochrome P450, family 4, subfamily Z, polypeptide 2 pseudogene (CYP4Z2P), non-coding RNA [NR_002788] | 163720 |

|              |      |      |      |      |         |                                                                                               |       |
|--------------|------|------|------|------|---------|-----------------------------------------------------------------------------------------------|-------|
| A_23_P169092 | -1.1 | -1.0 | -2.4 | -1.7 | CYP7B1  | Homo sapiens cytochrome P450, family 7, subfamily B, polypeptide 1 (CYP7B1), mRNA [NM_004820] | 9420  |
| A_23_P46426  | -1.0 | -4.2 | -1.4 | -1.8 | CYR61   | Homo sapiens cysteine-rich, angiogenic inducer, 61 (CYR61), mRNA [NM_001554]                  | 3491  |
| A_23_P22660  | 3.6  | 4.3  | 2.3  | 2.2  | CYSLTR1 | Homo sapiens cysteinyl leukotriene receptor 1 (CYSLTR1), mRNA [NM_006639]                     | 10800 |
| A_23_P319466 | -2.1 | 1.0  | -1.6 | 1.3  | CYSLTR2 | Homo sapiens cysteinyl leukotriene receptor 2 (CYSLTR2), mRNA [NM_020377]                     | 57105 |

|              |      |      |      |      |       |                                                                                            |       |
|--------------|------|------|------|------|-------|--------------------------------------------------------------------------------------------|-------|
| A_24_P551842 | 1.5  | 1.6  | 1.4  | -2.4 | CYTB  | mitochondrially encoded cytochrome b<br>[Source:HGNC Symbol;Acc:7427]<br>[ENST00000361789] | 4519  |
| A_24_P557534 | -1.0 | -4.3 | -2.1 | -2.3 | CYTB  | mitochondrially encoded cytochrome b<br>[Source:HGNC Symbol;Acc:7427]<br>[ENST00000361789] | 4519  |
| A_24_P374918 | -1.4 | -1.2 | -1.3 | -2.4 | CYTH2 | cytohesin 2<br>[Source:HGNC Symbol;Acc:9502]<br>[ENST00000467412]                          | 9266  |
| A_23_P155057 | 1.0  | -1.2 | -2.7 | -8.5 | CYTH4 | Homo sapiens cytohesin 4 (CYTH4), mRNA<br>[NM_013385]                                      | 27128 |

|              |     |      |      |      |        |                                                                                            |        |
|--------------|-----|------|------|------|--------|--------------------------------------------------------------------------------------------|--------|
| A_32_P6769   | 2.0 | -1.3 | 1.1  | 2.1  | D2HGDH | D-2-hydroxyglutarate dehydrogenase [Source:HGNC Symbol;Acc:28358] [ENST00000496252]        | 728294 |
| A_23_P54116  | 2.1 | 2.1  | 2.1  | -1.2 | DAAM1  | Homo sapiens dishevelled associated activator of morphogenesis 1 (DAAM1), mRNA [NM_014992] | 23002  |
| A_23_P23850  | 1.9 | 2.1  | 1.8  | 1.3  | DAB1   | Homo sapiens disabled homolog 1 (Drosophila) (DAB1), mRNA [NM_021080]                      | 1600   |
| A_24_P149704 | 1.2 | 1.3  | -5.6 | -2.8 | DAB2IP | Homo sapiens DAB2 interacting protein (DAB2IP), transcript variant 2, mRNA [NM_138709]     | 153090 |

|              |      |      |      |      |       |                                                                                                                             |        |
|--------------|------|------|------|------|-------|-----------------------------------------------------------------------------------------------------------------------------|--------|
| A_32_P464135 | -1.0 | -5.5 | -1.1 | -1.0 | DACH2 | Homo sapiens dachshund homolog 2 (Drosophila) (DACH2), transcript variant 1, mRNA [NM_053281]                               | 117154 |
| A_23_P65518  | -4.0 | -1.1 | 1.5  | -3.1 | DACT1 | Homo sapiens dapper, antagonist of beta-catenin, homolog 1 (Xenopus laevis) (DACT1), transcript variant 1, mRNA [NM_016651] | 51339  |
| A_24_P284093 | 4.1  | 1.3  | 1.8  | 2.0  | DACT1 | Homo sapiens dapper, antagonist of beta-catenin, homolog 1 (Xenopus laevis) (DACT1), transcript variant 1, mRNA [NM_016651] | 51339  |

|              |      |      |      |      |       |                                                                                                       |        |
|--------------|------|------|------|------|-------|-------------------------------------------------------------------------------------------------------|--------|
| A_24_P289260 | -7.8 | -1.1 | -1.0 | -2.2 | DACT2 | Homo sapiens dapper, antagonist of beta-catenin, homolog 2 (Xenopus laevis) (DACT2), mRNA [NM_214462] | 168002 |
| A_23_P360964 | -3.4 | -1.9 | -3.2 | 1.2  | DACT3 | Homo sapiens dapper, antagonist of beta-catenin, homolog 3 (Xenopus laevis) (DACT3), mRNA [NM_145056] | 147906 |
| A_24_P33014  | 8.6  | 3.5  | 6.6  | 6.2  | DACT3 | Homo sapiens dapper, antagonist of beta-catenin, homolog 3 (Xenopus laevis) (DACT3), mRNA [NM_145056] | 147906 |



|              |     |      |      |      |        |                                                                                                                   |       |
|--------------|-----|------|------|------|--------|-------------------------------------------------------------------------------------------------------------------|-------|
| A_24_P47870  | 1.0 | -1.0 | -1.3 | -2.8 | DAD1   | Homo sapiens defender against cell death 1 (DAD1), mRNA [NM_001344]                                               | 1603  |
| A_24_P225961 | 2.4 | 1.9  | 2.6  | 1.1  | DAG1   | Homo sapiens dystroglycan 1 (dystrophin-associated glycoprotein 1) (DAG1), transcript variant 2, mRNA [NM_004393] | 1605  |
| A_23_P135611 | 1.1 | 2.6  | -1.2 | 1.7  | DALRD3 | Homo sapiens DALR anticodon binding domain containing 3 (DALRD3), transcript variant 2, mRNA [NM_018114]          | 55152 |

|              |      |      |      |      |          |                                                                                               |        |
|--------------|------|------|------|------|----------|-----------------------------------------------------------------------------------------------|--------|
| A_23_P435636 | -4.3 | 1.1  | -1.1 | 1.0  | DAND5    | Homo sapiens DAN domain family, member 5 (DAND5), mRNA [NM_152654]                            | 199699 |
| A_23_P139635 | 1.1  | 7.5  | -1.1 | -1.0 | DAO      | Homo sapiens D-amino-acid oxidase (DAO), mRNA [NM_001917]                                     | 1610   |
| A_24_P155617 | 2.4  | 2.2  | 2.6  | -1.9 | DAOA     | Homo sapiens D-amino acid oxidase activator (DAOA), transcript variant 1, mRNA [NM_172370]    | 267012 |
| A_23_P306240 | -1.1 | -1.1 | -1.2 | -2.0 | DAOA-AS1 | Homo sapiens DAOA antisense RNA 1 (non-protein coding) (DAOA-AS1), non-coding RNA [NR_040247] | 282706 |

|              |     |      |      |      |       |                                                                                                |       |
|--------------|-----|------|------|------|-------|------------------------------------------------------------------------------------------------|-------|
| A_24_P243278 | 2.8 | 1.7  | 7.0  | 2.7  | DAP   | Homo sapiens death-associated protein (DAP), mRNA [NM_004394]                                  | 1611  |
| A_24_P10233  | 1.8 | -1.3 | -1.7 | 3.3  | DAPK2 | Homo sapiens death-associated protein kinase 2 (DAPK2), mRNA [NM_014326]                       | 23604 |
| A_23_P165028 | 1.0 | -4.2 | 1.5  | -1.0 | DAPK3 | Homo sapiens death-associated protein kinase 3 (DAPK3), mRNA [NM_001348]                       | 1613  |
| A_23_P255444 | 1.3 | 1.3  | -1.6 | -3.6 | DAPP1 | Homo sapiens dual adaptor of phosphotyrosine and 3-phosphoinositides (DAPP1), mRNA [NM_014395] | 27071 |

|              |       |      |      |      |         |                                                                                                                               |           |
|--------------|-------|------|------|------|---------|-------------------------------------------------------------------------------------------------------------------------------|-----------|
| A_23_P148984 | -27.7 | 1.0  | 1.0  | 1.2  | DARS2   | Homo sapiens aspartyl-tRNA synthetase 2, mitochondrial (DARS2), nuclear gene encoding mitochondrial protein, mRNA [NM_018122] | 55157     |
| A_32_P504673 | -1.2  | -1.3 | -4.8 | -1.2 | DAZ2    | Homo sapiens deleted in azoospermia 2 (DAZ2), transcript variant 3, mRNA [NM_001005786]                                       | 57055     |
| A_24_P921906 | -1.6  | -1.4 | -2.7 | -1.7 | DBIL5P2 | Homo sapiens diazepam binding inhibitor-like 5 pseudogene 2 (DBIL5P2), non-coding RNA [NR_036635]                             | 100169989 |

|              |      |      |      |     |        |                                                                                                                                 |       |
|--------------|------|------|------|-----|--------|---------------------------------------------------------------------------------------------------------------------------------|-------|
| A_23_P156284 | -1.4 | -2.7 | -1.5 | 1.1 | DBN1   | Homo sapiens drebrin 1 (DBN1), transcript variant 2, mRNA [NM_080881]                                                           | 1627  |
| A_23_P26439  | -1.5 | 1.9  | 2.0  | 1.1 | DBNDD1 | Homo sapiens dysbindin (dystrobrevin binding protein 1) domain containing 1 (DBNDD1), transcript variant 1, mRNA [NM_001042610] | 79007 |
| A_23_P28772  | -1.4 | -1.5 | -2.6 | 1.2 | DBNDD2 | Homo sapiens dysbindin (dystrobrevin binding protein 1) domain containing 2 (DBNDD2), transcript variant 6, mRNA [NM_001048226] | 55861 |

|              |      |      |      |      |     |                                                                                                                                   |      |
|--------------|------|------|------|------|-----|-----------------------------------------------------------------------------------------------------------------------------------|------|
| A_23_P130753 | 1.1  | -1.1 | -1.2 | -3.2 | DBP | Homo sapiens D site of albumin promoter (albumin D-box) binding protein (DBP), mRNA [NM_001352]                                   | 1628 |
| A_23_P130761 | 1.9  | 1.4  | 1.3  | 2.1  | DBP | Human albumin D-box binding protein (DBP) mRNA, complete cds. [U06936]                                                            | 1628 |
| A_32_P50005  | -1.3 | -2.0 | -1.4 | -1.1 | DBT | Homo sapiens dihydrolipoamide branched chain transacylase E2 (DBT), nuclear gene encoding mitochondrial protein, mRNA [NM_001918] | 1629 |

|              |      |      |      |      |        |                                                                            |       |
|--------------|------|------|------|------|--------|----------------------------------------------------------------------------|-------|
| A_24_P149766 | 90.5 | 90.6 | 89.4 | 29.0 | DCAF10 | Homo sapiens DDB1 and CUL4 associated factor 10 (DCAF10), mRNA [NM_024345] | 79269 |
| A_32_P133005 | -1.0 | -2.9 | -1.0 | -1.0 | DCAF10 | Homo sapiens DDB1 and CUL4 associated factor 10 (DCAF10), mRNA [NM_024345] | 79269 |
| A_23_P215875 | 1.1  | 1.1  | -6.1 | 1.8  | DCAF13 | Homo sapiens DDB1 and CUL4 associated factor 13 (DCAF13), mRNA [NM_015420] | 25879 |
| A_23_P50399  | 2.1  | 2.0  | 2.9  | 1.5  | DCAF15 | Homo sapiens DDB1 and CUL4 associated factor 15 (DCAF15), mRNA [NM_138353] | 90379 |

|              |      |      |      |      |       |                                                                                                                       |       |
|--------------|------|------|------|------|-------|-----------------------------------------------------------------------------------------------------------------------|-------|
| A_24_P248167 | 1.0  | -2.5 | -1.1 | 1.0  | DCAF4 | Homo sapiens mRNA; cDNA DKFZp434K114 (from clone DKFZp434K114). [AL080157]                                            | 26094 |
| A_23_P352684 | -3.3 | -1.4 | -1.8 | -1.1 | DCAF5 | Homo sapiens DDB1 and CUL4 associated factor 5 (DCAF5), nuclear gene encoding mitochondrial protein, mRNA [NM_003861] | 8816  |
| A_23_P160481 | -3.4 | 1.0  | -1.0 | 1.1  | DCAF6 | Homo sapiens DDB1 and CUL4 associated factor 6 (DCAF6), transcript variant 1, mRNA [NM_018442]                        | 55827 |



|              |      |      |      |      |       |                                                                                                          |       |
|--------------|------|------|------|------|-------|----------------------------------------------------------------------------------------------------------|-------|
| A_23_P422268 | 1.6  | -1.5 | -6.1 | 1.4  | DCAF7 | Homo sapiens DDB1 and CUL4 associated factor 7 (DCAF7), mRNA [NM_005828]                                 | 10238 |
| A_24_P916141 | 1.3  | 2.5  | -1.5 | -1.0 | DCAF7 | Homo sapiens DDB1 and CUL4 associated factor 7 (DCAF7), mRNA [NM_005828]                                 | 10238 |
| A_23_P200143 | 1.3  | -1.7 | -2.6 | -2.2 | DCAF8 | Homo sapiens DDB1 and CUL4 associated factor 8 (DCAF8), transcript variant 1, mRNA [NM_015726]           | 50717 |
| A_24_P76725  | -2.4 | 1.0  | 1.4  | 1.6  | DCAF8 | Homo sapiens DDB1 and CUL4 associated factor 8 (DCAF8), transcript variant 4, non-coding RNA [NR_028105] | 50717 |

|              |       |      |      |      |        |                                                                                                     |        |
|--------------|-------|------|------|------|--------|-----------------------------------------------------------------------------------------------------|--------|
| A_24_P82493  | 1.1   | 1.5  | 2.2  | 1.4  | DCAKD  | Homo sapiens dephospho-CoA kinase domain containing (DCAKD), transcript variant 1, mRNA [NM_024819] | 79877  |
| A_24_P243633 | 1.1   | -2.2 | 1.1  | 1.6  | DCBLD1 | Homo sapiens discoidin, CUB and LCCL domain containing 1 (DCBLD1), mRNA [NM_173674]                 | 285761 |
| A_23_P409462 | -11.3 | -1.0 | -1.1 | -1.0 | DCBLD1 | Homo sapiens discoidin, CUB and LCCL domain containing 1 (DCBLD1), mRNA [NM_173674]                 | 285761 |

|              |       |      |      |       |        |                                                                                              |        |
|--------------|-------|------|------|-------|--------|----------------------------------------------------------------------------------------------|--------|
| A_23_P258234 | -11.4 | 2.4  | 1.7  | -11.0 | DCBLD1 | discoidin, CUB and LCCL domain containing 1 [Source:HGNC Symbol;Acc:21479] [ENST00000338728] | 285761 |
| A_24_P51061  | -7.9  | -1.1 | -1.6 | -1.1  | DCBLD2 | Homo sapiens discoidin, CUB and LCCL domain containing 2 (DCBLD2), mRNA [NM_080927]          | 131566 |
| A_24_P117663 | 1.0   | -9.8 | -1.1 | -1.1  | DCDC1  | Homo sapiens doublecortin domain containing 1 (DCDC1), mRNA [NM_181807]                      | 341019 |
| A_23_P98645  | -1.0  | -1.1 | -3.0 | -1.1  | DCHS1  | Homo sapiens dachsous 1 (Drosophila) (DCHS1), mRNA [NM_003737]                               | 8642   |

|              |      |      |       |      |         |                                                                                            |       |
|--------------|------|------|-------|------|---------|--------------------------------------------------------------------------------------------|-------|
| A_23_P144490 | -1.8 | -1.9 | -12.1 | -1.8 | DCHS2   | Homo sapiens dachsous 2 (Drosophila) (DCHS2), transcript variant 1, mRNA [NM_017639]       | 54798 |
| A_32_P108889 | -3.3 | -8.1 | -6.9  | -2.5 | DCLK1   | Homo sapiens doublecortin-like kinase 1 (DCLK1), transcript variant 1, mRNA [NM_004734]    | 9201  |
| A_23_P86632  | 2.2  | 2.2  | 2.0   | 2.2  | DCLRE1C | Homo sapiens DNA cross-link repair 1C (DCLRE1C), transcript variant c, mRNA [NM_001033858] | 64421 |
| A_23_P64873  | -4.6 | -1.3 | -1.5  | 1.0  | DCN     | Homo sapiens decorin (DCN), transcript variant A1, mRNA [NM_001920]                        | 1634  |

|              |      |      |      |     |       |                                                                                        |        |
|--------------|------|------|------|-----|-------|----------------------------------------------------------------------------------------|--------|
| A_23_P313512 | -2.7 | 1.0  | 1.0  | 1.1 | DCP1B | Homo sapiens DCP1 decapping enzyme homolog B (S. cerevisiae) (DCP1B), mRNA [NM_152640] | 196513 |
| A_23_P314798 | 1.4  | 1.7  | -2.3 | 1.7 | DCST2 | Homo sapiens DC-STAMP domain containing 2 (DCST2), mRNA [NM_144622]                    | 127579 |
| A_23_P142835 | 1.8  | -1.1 | 2.1  | 1.2 | DCTN1 | Homo sapiens dynactin 1 (DCTN1), transcript variant 1, mRNA [NM_004082]                | 1639   |
| A_23_P360167 | 1.9  | 1.0  | -1.7 | 2.4 | DCTN2 | Homo sapiens dynactin 2 (p50) (DCTN2), mRNA [NM_006400]                                | 10540  |

|              |      |      |      |      |         |                                                                                                                          |       |
|--------------|------|------|------|------|---------|--------------------------------------------------------------------------------------------------------------------------|-------|
| A_24_P209765 | 1.3  | 2.9  | 2.2  | 1.6  | DCTN3   | Homo sapiens dynactin 3 (p22) (DCTN3), transcript variant 1, mRNA [NM_007234]                                            | 11258 |
| A_24_P166012 | -1.6 | -3.0 | -2.1 | -1.2 | DCUN1D1 | Homo sapiens DCN1, defective in cullin neddylation 1, domain containing 1 (S. cerevisiae) (DCUN1D1), mRNA [NM_020640]    | 54165 |
| A_24_P215628 | 1.0  | 1.0  | -2.2 | -1.3 | DCUN1D2 | Homo sapiens DCN1, defective in cullin neddylation 1, domain containing 2 (S. cerevisiae) (DCUN1D2), mRNA [NM_001014283] | 55208 |

|              |      |      |      |      |         |                                                                                                                                                |       |
|--------------|------|------|------|------|---------|------------------------------------------------------------------------------------------------------------------------------------------------|-------|
| A_32_P43812  | -1.0 | -3.4 | -1.1 | -2.1 | DCUN1D4 | Homo sapiens DCN1, defective in cullin neddylation 1, domain containing 4 (S. cerevisiae) (DCUN1D4), transcript variant 1, mRNA [NM_001040402] | 23142 |
| A_24_P262738 | 6.0  | 3.2  | 2.3  | 3.8  | DDA1    | Homo sapiens DET1 and DDB1 associated 1 (DDA1), mRNA [NM_024050]                                                                               | 79016 |
| A_23_P16671  | 5.1  | 8.5  | 4.2  | -8.0 | DDA1    | Homo sapiens DET1 and DDB1 associated 1 (DDA1), mRNA [NM_024050]                                                                               | 79016 |

|              |       |      |      |      |       |                                                                                          |       |
|--------------|-------|------|------|------|-------|------------------------------------------------------------------------------------------|-------|
| A_23_P52610  | -2.5  | -2.5 | 1.0  | 1.2  | DDB2  | Homo sapiens damage-specific DNA binding protein 2, 48kDa (DDB2), mRNA [NM_000107]       | 1643  |
| A_24_P104278 | -1.1  | -4.8 | -1.1 | -1.1 | DDHD1 | Homo sapiens DDHD domain containing 1 (DDHD1), transcript variant 3, mRNA [NM_001160148] | 80821 |
| A_24_P911489 | 1.3   | -3.9 | -1.2 | 1.2  | DDHD1 | Homo sapiens DDHD domain containing 1 (DDHD1), transcript variant 1, mRNA [NM_030637]    | 80821 |
| A_23_P205623 | -30.0 | 1.5  | 1.5  | -1.2 | DDHD1 | Homo sapiens DDHD domain containing 1 (DDHD1), transcript variant 1, mRNA [NM_030637]    | 80821 |



|              |      |      |     |      |       |                                                                                                   |        |
|--------------|------|------|-----|------|-------|---------------------------------------------------------------------------------------------------|--------|
| A_23_P401238 | 4.5  | 6.4  | 6.2 | 3.3  | DDHD2 | Homo sapiens DDHD domain containing 2 (DDHD2), transcript variant 1, mRNA [NM_015214]             | 23259  |
| A_23_P116145 | -1.0 | -8.2 | 1.0 | -1.0 | DDI1  | Homo sapiens DNA-damage inducible 1 homolog 1 (S. cerevisiae) (DDI1), mRNA [NM_001001711]         | 414301 |
| A_23_P63114  | 1.6  | 1.0  | 1.0 | 2.7  | DDI2  | DNA-damage inducible 1 homolog 2 (S. cerevisiae) [Source:HGNC Symbol;Acc:24578] [ENST00000486680] | 84301  |

|              |       |      |      |      |      |                                                                                                         |       |
|--------------|-------|------|------|------|------|---------------------------------------------------------------------------------------------------------|-------|
| A_32_P83547  | 2.3   | 2.3  | 1.9  | 1.4  | DDI2 | DNA-damage inducible 1 homolog 2 (S. cerevisiae) [Source:HGNC Symbol;Accession:24578] [ENST00000480945] | 84301 |
| A_24_P123601 | -65.4 | -1.6 | -1.1 | -1.0 | DDR1 | Homo sapiens discoidin domain receptor tyrosine kinase 1 (DDR1), transcript variant 2, mRNA [NM_013993] | 780   |
| A_23_P93311  | -1.4  | -4.9 | 1.2  | 1.0  | DDR1 | Homo sapiens discoidin domain receptor tyrosine kinase 1 (DDR1), transcript variant 2, mRNA [NM_013993] | 780   |

|              |      |      |     |      |         |                                                                                                                                 |       |
|--------------|------|------|-----|------|---------|---------------------------------------------------------------------------------------------------------------------------------|-------|
| A_23_P203949 | 3.8  | 2.3  | 1.5 | 2.3  | DDX11   | Homo sapiens DEAD/H (Asp-Glu-Ala-Asp/His) box polypeptide 11 (DDX11), transcript variant 1, mRNA [NM_030653]                    | 1663  |
| A_23_P154294 | -2.8 | -3.3 | 1.4 | -1.2 | DDX11L2 | Homo sapiens DEAD/H (Asp-Glu-Ala-Asp/His) box polypeptide 11 like 2 (DDX11L2), transcript variant 2, non-coding RNA [NR_024005] | 84771 |

|              |     |      |      |      |         |                                                                                                                                 |       |
|--------------|-----|------|------|------|---------|---------------------------------------------------------------------------------------------------------------------------------|-------|
| A_32_P227317 | 1.0 | -1.8 | -2.6 | 1.0  | DDX11L2 | Homo sapiens DEAD/H (Asp-Glu-Ala-Asp/His) box polypeptide 11 like 2 (DDX11L2), transcript variant 2, non-coding RNA [NR_024005] | 84771 |
| A_24_P925611 | 1.4 | -1.4 | -1.3 | -3.7 | DDX17   | Homo sapiens DEAD (Asp-Glu-Ala-Asp) box polypeptide 17 (DDX17), transcript variant 1, mRNA [NM_006386]                          | 10521 |
| A_23_P218784 | 2.6 | 2.8  | -1.1 | 1.3  | DDX17   | Homo sapiens DEAD (Asp-Glu-Ala-Asp) box polypeptide 17 (DDX17), transcript variant 1, mRNA [NM_006386]                          | 10521 |

|              |     |     |     |      |        |                                                                                                         |       |
|--------------|-----|-----|-----|------|--------|---------------------------------------------------------------------------------------------------------|-------|
| A_23_P140994 | 2.4 | 1.6 | 1.7 | 1.6  | DDX19B | Homo sapiens DEAD (Asp-Glu-Ala-As) box polypeptide 19B (DDX19B), transcript variant 1, mRNA [NM_007242] | 11269 |
| A_24_P146603 | 6.7 | 6.8 | 6.4 | 4.7  | DDX21  | Homo sapiens DEAD (Asp-Glu-Ala-Asp) box polypeptide 21 (DDX21), mRNA [NM_004728]                        | 9188  |
| A_23_P151544 | 1.2 | 2.2 | 1.0 | -1.2 | DDX24  | Homo sapiens DEAD (Asp-Glu-Ala-Asp) box polypeptide 24 (DDX24), mRNA [NM_020414]                        | 57062 |

|              |      |     |      |      |       |                                                                                                        |       |
|--------------|------|-----|------|------|-------|--------------------------------------------------------------------------------------------------------|-------|
| A_23_P138910 | -1.1 | 1.0 | -2.8 | -1.0 | DDX25 | Homo sapiens DEAD (Asp-Glu-Ala-Asp) box polypeptide 25 (DDX25), mRNA [NM_013264]                       | 29118 |
| A_23_P40194  | -2.2 | 1.0 | -1.1 | 1.0  | DDX27 | Homo sapiens DEAD (Asp-Glu-Ala-Asp) box polypeptide 27 (DDX27), mRNA [NM_017895]                       | 55661 |
| A_24_P112377 | 3.5  | 3.6 | 3.4  | 2.6  | DDX31 | Homo sapiens DEAD (Asp-Glu-Ala-Asp) box polypeptide 31 (DDX31), transcript variant 2, mRNA [NM_138620] | 64794 |

|              |      |      |      |     |        |                                                                                                                 |       |
|--------------|------|------|------|-----|--------|-----------------------------------------------------------------------------------------------------------------|-------|
| A_23_P60405  | 4.0  | 2.4  | 1.6  | 1.3 | DDX31  | Homo sapiens DEAD (Asp-Glu-Ala-Asp) box polypeptide 31 (DDX31), transcript variant 1, mRNA [NM_022779]          | 64794 |
| A_23_P78664  | 2.1  | -1.0 | 1.1  | 1.4 | DDX39A | Homo sapiens DEAD (Asp-Glu-Ala-Asp) box polypeptide 39A (DDX39A), transcript variant 1, mRNA [NM_005804]        | 10212 |
| A_23_P317657 | -2.0 | -1.6 | -2.1 | 1.0 | DDX3X  | Homo sapiens DEAD (Asp-Glu-Ala-Asp) box polypeptide 3, X-linked (DDX3X), transcript variant 1, mRNA [NM_001356] | 1654  |

|              |      |     |      |      |       |                                                                                  |       |
|--------------|------|-----|------|------|-------|----------------------------------------------------------------------------------|-------|
| A_23_P122116 | 2.4  | 3.3 | 3.0  | 1.3  | DDX41 | Homo sapiens DEAD (Asp-Glu-Ala-Asp) box polypeptide 41 (DDX41), mRNA [NM_016222] | 51428 |
| A_23_P156445 | -4.8 | 1.7 | 1.6  | 1.0  | DDX43 | Homo sapiens DEAD (Asp-Glu-Ala-Asp) box polypeptide 43 (DDX43), mRNA [NM_018665] | 55510 |
| A_23_P30377  | 3.8  | 3.7 | -1.5 | -1.5 | DDX46 | Homo sapiens DEAD (Asp-Glu-Ala-Asp) box polypeptide 46 (DDX46), mRNA [NM_014829] | 9879  |



|              |      |       |      |      |       |                                                                                                        |       |
|--------------|------|-------|------|------|-------|--------------------------------------------------------------------------------------------------------|-------|
| A_23_P65089  | -2.0 | -21.3 | -1.2 | -1.8 | DDX47 | Homo sapiens DEAD (Asp-Glu-Ala-Asp) box polypeptide 47 (DDX47), transcript variant 1, mRNA [NM_016355] | 51202 |
| A_23_P16573  | -1.8 | -1.2  | -1.2 | -4.4 | DDX49 | Homo sapiens DEAD (Asp-Glu-Ala-Asp) box polypeptide 49 (DDX49), transcript variant 1, mRNA [NM_019070] | 54555 |
| A_23_P104451 | 1.1  | -4.4  | 1.0  | 1.0  | DDX50 | Homo sapiens DEAD (Asp-Glu-Ala-Asp) box polypeptide 50 (DDX50), mRNA [NM_024045]                       | 79009 |

|              |      |      |      |      |       |                                                                                                        |       |
|--------------|------|------|------|------|-------|--------------------------------------------------------------------------------------------------------|-------|
| A_24_P512054 | -1.0 | -1.0 | -3.9 | 1.1  | DDX50 | Homo sapiens DEAD (Asp-Glu-Ala-Asp) box polypeptide 50 (DDX50), mRNA [NM_024045]                       | 79009 |
| A_32_P430359 | -1.0 | 2.1  | -1.1 | -1.1 | DDX54 | Homo sapiens DEAD (Asp-Glu-Ala-Asp) box polypeptide 54 (DDX54), transcript variant 2, mRNA [NM_024072] | 79039 |
| A_23_P47839  | -1.0 | -2.0 | -1.1 | -1.1 | DDX55 | Homo sapiens DEAD (Asp-Glu-Ala-Asp) box polypeptide 55 (DDX55), mRNA [NM_020936]                       | 57696 |

|              |      |      |      |     |       |                                                                                                  |       |
|--------------|------|------|------|-----|-------|--------------------------------------------------------------------------------------------------|-------|
| A_24_P935622 | 1.4  | -2.4 | 1.2  | 1.6 | DDX56 | DEAD (Asp-Glu-Ala-Asp) box polypeptide 56<br>[Source:HGNC Symbol;Acc:18193]<br>[ENST00000421223] | 54606 |
| A_23_P20814  | -3.7 | -1.0 | -1.2 | 1.1 | DDX58 | Homo sapiens DEAD (Asp-Glu-Ala-Asp) box polypeptide 58 (DDX58), mRNA<br>[NM_014314]              | 23586 |
| A_23_P203201 | -2.9 | 1.4  | 1.5  | 1.4 | DDX6  | Homo sapiens DEAD (Asp-Glu-Ala-Asp) box polypeptide 6 (DDX6), mRNA<br>[NM_004397]                | 1656  |

|              |      |      |      |      |        |                                                                                                |       |
|--------------|------|------|------|------|--------|------------------------------------------------------------------------------------------------|-------|
| A_23_P41470  | -3.5 | -1.1 | 1.0  | 1.0  | DDX60  | Homo sapiens DEAD (Asp-Glu-Ala-Asp) box polypeptide 60 (DDX60), mRNA [NM_017631]               | 55601 |
| A_32_P161292 | -1.0 | -3.9 | -1.1 | -1.0 | DDX60L | Homo sapiens DEAD (Asp-Glu-Ala-Asp) box polypeptide 60-like (DDX60L), mRNA [NM_001012967]      | 91351 |
| A_23_P158533 | 2.3  | 1.5  | 1.5  | 1.8  | DEAF1  | Homo sapiens deformed epidermal autoregulatory factor 1 (Drosophila) (DEAF1), mRNA [NM_021008] | 10522 |

|              |     |      |      |     |       |                                                                                                |        |
|--------------|-----|------|------|-----|-------|------------------------------------------------------------------------------------------------|--------|
| A_23_P124044 | 1.2 | 2.2  | 1.2  | 1.1 | DEAF1 | Homo sapiens deformed epidermal autoregulatory factor 1 (Drosophila) (DEAF1), mRNA [NM_021008] | 10522  |
| A_23_P74716  | 3.5 | 2.5  | -1.7 | 2.7 | DEDD  | Homo sapiens death effector domain containing (DEDD), transcript variant 1, mRNA [NM_032998]   | 9191   |
| A_24_P207479 | 1.2 | -1.6 | -2.1 | 1.0 | DEDD2 | Homo sapiens death effector domain containing 2 (DEDD2), mRNA [NM_133328]                      | 162989 |

|              |      |      |      |      |          |                                                                                                                |        |
|--------------|------|------|------|------|----------|----------------------------------------------------------------------------------------------------------------|--------|
| A_23_P88893  | 5.3  | 8.2  | 6.3  | 2.7  | DEF8     | Homo sapiens differentially expressed in FDCP 8 homolog (mouse) (DEF8), transcript variant 2, mRNA [NM_017702] | 54849  |
| A_24_P193582 | -2.7 | 1.0  | -1.0 | 1.1  | DEF8     | Homo sapiens differentially expressed in FDCP 8 homolog (mouse) (DEF8), transcript variant 2, mRNA [NM_017702] | 54849  |
| A_23_P169017 | -4.8 | -1.0 | 1.3  | 1.5  | DEFB103B | Homo sapiens defensin, beta 103B (DEFB103B), mRNA [NM_018661]                                                  | 55894  |
| A_23_P380871 | -1.1 | 5.7  | -1.0 | -1.0 | DEFB105B | Homo sapiens defensin, beta 105B (DEFB105B), mRNA [NM_001040703]                                               | 504180 |

|              |       |      |      |      |          |                                                                                   |        |
|--------------|-------|------|------|------|----------|-----------------------------------------------------------------------------------|--------|
| A_32_P71343  | 3.1   | 3.1  | 2.2  | 2.1  | DEFB106B | Homo sapiens defensin, beta 106B (DEFB106B), mRNA [NM_001040704]                  | 503841 |
| A_23_P312285 | 2.2   | 1.6  | 1.7  | 3.4  | DEFB119  | Homo sapiens defensin, beta 119 (DEFB119), transcript variant 2, mRNA [NM_173460] | 245932 |
| A_32_P108107 | -71.9 | -2.1 | 1.0  | 1.9  | DEFB119  | Homo sapiens defensin, beta 119 (DEFB119), transcript variant 3, mRNA [NM_153323] | 245932 |
| A_23_P356694 | 1.8   | 3.3  | 1.7  | -1.8 | DEFB123  | Homo sapiens defensin, beta 123 (DEFB123), mRNA [NM_153324]                       | 245936 |
| A_23_P320846 | -1.2  | -1.2 | -4.7 | -1.9 | DEFB125  | Homo sapiens defensin, beta 125 (DEFB125), mRNA [NM_153325]                       | 245938 |

|              |      |      |      |       |         |                                                                                               |        |
|--------------|------|------|------|-------|---------|-----------------------------------------------------------------------------------------------|--------|
| A_23_P385843 | -2.2 | -1.0 | 1.0  | -1.6  | DEFB127 | Homo sapiens defensin, beta 127 (DEFB127), mRNA [NM_139074]                                   | 140850 |
| A_23_P102694 | 8.4  | 7.9  | 8.3  | 8.0   | DEFB129 | Homo sapiens defensin, beta 129 (DEFB129), mRNA [NM_080831]                                   | 140881 |
| A_32_P23854  | 2.1  | -2.9 | -1.2 | -1.1  | DENND1A | Homo sapiens DENN/MADD domain containing 1A (DENND1A), transcript variant 1, mRNA [NM_020946] | 57706  |
| A_24_P272761 | -1.3 | -1.0 | -1.1 | -30.1 | DENND1A | Homo sapiens DENN/MADD domain containing 1A (DENND1A), transcript variant 1, mRNA [NM_020946] | 57706  |



|              |      |      |      |      |         |                                                                                               |        |
|--------------|------|------|------|------|---------|-----------------------------------------------------------------------------------------------|--------|
| A_23_P43557  | 1.2  | 1.6  | 1.1  | -2.4 | DENND1A | Homo sapiens DENN/MADD domain containing 1A (DENND1A), transcript variant 2, mRNA [NM_024820] | 57706  |
| A_24_P943283 | -2.2 | -2.3 | -2.5 | -3.1 | DENND1B | DENN/MADD domain containing 1B [Source:HGNC Symbol;Acc:28404] [ENST00000496935]               | 163486 |
| A_23_P78608  | 1.2  | -1.7 | -2.7 | -3.3 | DENND1C | Homo sapiens DENN/MADD domain containing 1C (DENND1C), mRNA [NM_024898]                       | 79958  |
| A_24_P334726 | 1.8  | 2.3  | 2.2  | 1.9  | DENND2A | Homo sapiens DENN/MADD domain containing 2A (DENND2A), mRNA [NM_015689]                       | 27147  |

|              |      |      |      |      |         |                                                                                                  |        |
|--------------|------|------|------|------|---------|--------------------------------------------------------------------------------------------------|--------|
| A_23_P257583 | 2.9  | 2.7  | 3.0  | 1.5  | DENND2A | Homo sapiens DENN/MADD domain containing 2A (DENND2A), mRNA [NM_015689]                          | 27147  |
| A_24_P6467   | -1.8 | -7.0 | -1.8 | -5.1 | DENND2C | Homo sapiens DENN/MADD domain containing 2C (DENND2C), mRNA [NM_198459]                          | 163259 |
| A_23_P311346 | -1.7 | -1.4 | -1.8 | -5.2 | DENND2D | DENN/MADD domain containing 2D [Source:HGNC Symbol;Acc:26192] [ENST00000473682]                  | 79961  |
| A_23_P384329 | 2.1  | -1.1 | -1.3 | -1.2 | DENND4A | Homo sapiens DENN/MADD domain containing 4A (DENND4A), transcript variant 1, mRNA [NM_001144823] | 10260  |

|              |      |      |      |      |         |                                                                                                  |       |
|--------------|------|------|------|------|---------|--------------------------------------------------------------------------------------------------|-------|
| A_24_P136497 | -2.7 | -1.9 | -1.1 | -2.1 | DENND4A | Homo sapiens DENN/MADD domain containing 4A (DENND4A), transcript variant 2, mRNA [NM_005848]    | 10260 |
| A_24_P409265 | 4.4  | 4.4  | 2.4  | 3.4  | DENND4A | Homo sapiens DENN/MADD domain containing 4A (DENND4A), transcript variant 2, mRNA [NM_005848]    | 10260 |
| A_23_P420092 | 2.7  | 2.6  | 2.6  | 2.6  | DENND4A | Homo sapiens DENN/MADD domain containing 4A (DENND4A), transcript variant 1, mRNA [NM_001144823] | 10260 |

|              |      |      |      |       |         |                                                                                         |        |
|--------------|------|------|------|-------|---------|-----------------------------------------------------------------------------------------|--------|
| A_23_P774    | -1.2 | -2.9 | -1.4 | -15.7 | DENND4B | Homo sapiens DENN/MADD domain containing 4B (DENND4B), mRNA [NM_014856]                 | 9909   |
| A_24_P93633  | 3.4  | 2.9  | 2.9  | 3.0   | DENND4C | DENN/MADD domain containing 4C [Source:HGNC Symbol;Acc:26079] [ENST00000380424]         | 55667  |
| A_24_P541919 | 1.1  | -1.2 | -1.3 | -6.0  | DENND5B | Homo sapiens DENN/MADD domain containing 5B (DENND5B), mRNA [NM_144973]                 | 160518 |
| A_23_P361419 | 2.2  | 1.0  | 1.0  | 1.1   | DEPDC1B | Homo sapiens DEP domain containing 1B (DEPDC1B), transcript variant 1, mRNA [NM_018369] | 55789  |

|              |      |      |      |      |        |                                                                                                |       |
|--------------|------|------|------|------|--------|------------------------------------------------------------------------------------------------|-------|
| A_23_P60166  | -1.7 | -1.0 | -3.1 | -3.0 | DEPTOR | Homo sapiens DEP domain containing MTOR-interacting protein (DEPTOR), mRNA [NM_022783]         | 64798 |
| A_24_P239343 | 9.1  | 3.7  | 3.5  | 3.8  | DERL3  | Homo sapiens Der1-like domain family, member 3 (DERL3), transcript variant 3, mRNA [NM_198440] | 91319 |
| A_23_P6362   | 1.3  | 2.2  | 1.4  | 2.8  | DERL3  | Homo sapiens Der1-like domain family, member 3 (DERL3), transcript variant 3, mRNA [NM_198440] | 91319 |

|             |      |      |      |      |      |                                                                                                                   |       |
|-------------|------|------|------|------|------|-------------------------------------------------------------------------------------------------------------------|-------|
| A_23_P26184 | -9.3 | 1.0  | -1.0 | 1.1  | DET1 | Homo sapiens de-etiolated homolog 1 (Arabidopsis) (DET1), transcript variant 1, mRNA [NM_017996]                  | 55070 |
| A_23_P12189 | 2.0  | 2.3  | -1.2 | -1.3 | DFFA | Homo sapiens DNA fragmentation factor, 45kDa, alpha polypeptide (DFFA), transcript variant 2, mRNA [NM_213566]    | 1676  |
| A_23_P44546 | 1.0  | -2.1 | -2.5 | -1.4 | DFFB | Homo sapiens DNA fragmentation factor, 40kDa, beta polypeptide (caspase-activated DNase) (DFFB), mRNA [NM_004402] | 1677  |

|              |      |      |      |      |        |                                                                                                                   |       |
|--------------|------|------|------|------|--------|-------------------------------------------------------------------------------------------------------------------|-------|
| A_24_P370626 | -1.3 | -5.6 | -2.4 | -1.4 | DFFB   | Homo sapiens DNA fragmentation factor, 40kDa, beta polypeptide (caspase-activated DNase) (DFFB), mRNA [NM_004402] | 1677  |
| A_24_P376129 | -6.0 | 1.0  | -1.6 | -1.0 | DFNB31 | deafness, autosomal recessive 31 [Source:H GNC Symbol;Acc:16361] [ENST00000374057]                                | 25861 |
| A_23_P112162 | -1.0 | -2.1 | -2.9 | -1.2 | DGAT1  | Homo sapiens diacylglycerol O-acyltransferase 1 (DGAT1), mRNA [NM_012079]                                         | 8694  |
| A_23_P53198  | -2.0 | -1.1 | -1.2 | -1.2 | DGAT2  | Homo sapiens diacylglycerol O-acyltransferase 2 (DGAT2), mRNA [NM_032564]                                         | 84649 |

|              |      |      |      |      |       |                                                                                                       |       |
|--------------|------|------|------|------|-------|-------------------------------------------------------------------------------------------------------|-------|
| A_24_P125881 | -3.5 | -1.0 | -3.0 | -1.8 | DGCR2 | Homo sapiens DiGeorge syndrome critical region gene 2 (DGCR2), transcript variant 1, mRNA [NM_005137] | 9993  |
| A_24_P202948 | -1.3 | 2.6  | 2.3  | -1.1 | DGCR6 | Homo sapiens DiGeorge syndrome critical region gene 6 (DGCR6), mRNA [NM_005675]                       | 8214  |
| A_24_P113521 | -1.2 | -3.1 | -1.4 | 1.0  | DGCR8 | Homo sapiens DiGeorge syndrome critical region gene 8 (DGCR8), transcript variant 1, mRNA [NM_022720] | 54487 |



|              |      |      |      |       |       |                                                                                                       |        |
|--------------|------|------|------|-------|-------|-------------------------------------------------------------------------------------------------------|--------|
| A_23_P211355 | 1.1  | 1.7  | 2.1  | 2.1   | DGCR8 | Homo sapiens DiGeorge syndrome critical region gene 8 (DGCR8), transcript variant 1, mRNA [NM_022720] | 54487  |
| A_23_P40926  | -2.4 | -1.1 | -1.2 | -20.3 | DGKG  | Homo sapiens diacylglycerol kinase, gamma 90kDa (DGKG), transcript variant 1, mRNA [NM_001346]        | 1608   |
| A_23_P502980 | -1.0 | -9.6 | -1.0 | -1.1  | DGKH  | Homo sapiens diacylglycerol kinase, eta (DGKH), transcript variant 1, mRNA [NM_152910]                | 160851 |

|              |      |      |      |      |       |                                                                                                 |       |
|--------------|------|------|------|------|-------|-------------------------------------------------------------------------------------------------|-------|
| A_24_P103952 | -1.2 | -1.1 | -2.3 | -1.6 | DGKZ  | Homo sapiens diacylglycerol kinase, zeta (DGKZ), transcript variant 2, mRNA [NM_003646]         | 8525  |
| A_23_P127627 | 1.3  | 3.5  | 1.6  | 1.2  | DGKZ  | Homo sapiens diacylglycerol kinase, zeta (DGKZ), transcript variant 2, mRNA [NM_003646]         | 8525  |
| A_23_P24444  | -1.3 | 1.2  | -1.4 | -2.3 | DHCR7 | Homo sapiens 7-dehydrocholesterol reductase (DHCR7), transcript variant 1, mRNA [NM_001360]     | 1717  |
| A_23_P201764 | 2.0  | -1.3 | -2.5 | -2.5 | DHDDS | Homo sapiens dehydrodichyl diphosphate synthase (DHDDS), transcript variant 2, mRNA [NM_024887] | 79947 |

|              |       |      |      |      |        |                                                                                              |        |
|--------------|-------|------|------|------|--------|----------------------------------------------------------------------------------------------|--------|
| A_32_P211045 | -1.1  | -1.0 | -1.5 | -2.0 | DHFR   | Homo sapiens dihydrofolate reductase (DHFR), mRNA [NM_000791]                                | 1719   |
| A_24_P343095 | 3.7   | 5.0  | 5.0  | 3.6  | DHFR   | Homo sapiens dihydrofolate reductase (DHFR), mRNA [NM_000791]                                | 1719   |
| A_24_P942328 | -17.4 | -1.1 | -1.1 | -1.0 | DHFR   | Homo sapiens dihydrofolate reductase (DHFR), mRNA [NM_000791]                                | 1719   |
| A_23_P139312 | -2.0  | -1.3 | -3.1 | -4.2 | DHFRL1 | Homo sapiens dihydrofolate reductase-like 1 (DHFRL1), transcript variant 2, mRNA [NM_176815] | 200895 |
| A_23_P162314 | -1.4  | 1.0  | 2.2  | 1.6  | DHH    | Homo sapiens desert hedgehog (DHH), mRNA [NM_021044]                                         | 50846  |

|              |      |     |       |      |        |                                                                                                                            |        |
|--------------|------|-----|-------|------|--------|----------------------------------------------------------------------------------------------------------------------------|--------|
| A_23_P15202  | 1.2  | 1.2 | -11.2 | 1.0  | DHODH  | Homo sapiens dihydroorotate dehydrogenase (quinone) (DHODH), nuclear gene encoding mitochondrial protein, mRNA [NM_001361] | 1723   |
| A_23_P48747  | -2.0 | 2.1 | 1.4   | 1.1  | DHRS1  | Homo sapiens dehydrogenase/reductase (SDR family) member 1 (DHRS1), transcript variant 2, mRNA [NM_138452]                 | 115817 |
| A_24_P322215 | -1.6 | 1.6 | -2.3  | -1.6 | DHRS13 | Homo sapiens dehydrogenase/reductase (SDR family) member 13 (DHRS13), mRNA [NM_144683]                                     | 147015 |

|              |       |      |      |      |        |                                                                                                            |        |
|--------------|-------|------|------|------|--------|------------------------------------------------------------------------------------------------------------|--------|
| A_23_P66719  | -10.2 | 1.2  | 1.2  | 1.0  | DHRS13 | Homo sapiens dehydrogenase/reductase (SDR family) member 13 (DHRS13), mRNA [NM_144683]                     | 147015 |
| A_23_P321501 | -2.6  | -1.5 | -1.6 | -1.5 | DHRS2  | Homo sapiens dehydrogenase/reductase (SDR family) member 2 (DHRS2), transcript variant 1, mRNA [NM_182908] | 10202  |
| A_23_P162982 | -2.5  | 1.7  | 1.6  | 1.0  | DHRS4  | Homo sapiens dehydrogenase/reductase (SDR family) member 4 (DHRS4), mRNA [NM_021004]                       | 10901  |

|              |      |      |      |      |         |                                                                                                                                                      |        |
|--------------|------|------|------|------|---------|------------------------------------------------------------------------------------------------------------------------------------------------------|--------|
| A_24_P903378 | 2.0  | 2.4  | 1.5  | 1.3  | DHRS4L1 | Homo sapiens isolate 1261292 dehydrogenase/reductase SDR family member 4-like 1 (DHRS4L1) mRNA, complete sequence, alternatively spliced. [GQ871922] | 728635 |
| A_23_P117506 | -2.9 | -4.3 | -2.8 | -4.5 | DHRS7   | Homo sapiens dehydrogenase/reductase (SDR family) member 7 (DHRS7), mRNA [NM_016029]                                                                 | 51635  |
| A_24_P279520 | 3.4  | 3.3  | 3.1  | 1.0  | DHRS7B  | Homo sapiens dehydrogenase/reductase (SDR family) member 7B (DHRS7B), mRNA [NM_015510]                                                               | 25979  |

|              |      |      |      |      |        |                                                                                                                 |        |
|--------------|------|------|------|------|--------|-----------------------------------------------------------------------------------------------------------------|--------|
| A_24_P130352 | -1.3 | -1.7 | -2.2 | -1.7 | DHRS7B | Homo sapiens dehydrogenase/reductase (SDR family) member 7B (DHRS7B), mRNA [NM_015510]                          | 25979  |
| A_23_P141208 | -1.9 | 2.6  | 1.6  | -1.3 | DHRS7B | Homo sapiens dehydrogenase/reductase (SDR family) member 7B (DHRS7B), mRNA [NM_015510]                          | 25979  |
| A_23_P129916 | 1.2  | 2.1  | 1.3  | 1.2  | DHRS7C | Homo sapiens dehydrogenase/reductase (SDR family) member 7C (DHRS7C), transcript variant 1, mRNA [NM_001220493] | 201140 |

|              |     |     |      |      |        |                                                                                                                                             |       |
|--------------|-----|-----|------|------|--------|---------------------------------------------------------------------------------------------------------------------------------------------|-------|
| A_23_P12601  | 1.0 | 1.0 | -1.0 | -2.7 | DHTKD1 | Homo sapiens dehydrogenase E1 and transketolase domain containing 1 (DHTKD1), nuclear gene encoding mitochondrial protein, mRNA [NM_018706] | 55526 |
| A_23_P168062 | 2.2 | 1.3 | 1.7  | 2.9  | DHX16  | Homo sapiens DEAH (Asp-Glu-Ala-His) box polypeptide 16 (DHX16), transcript variant 1, mRNA [NM_003587]                                      | 8449  |
| A_23_P81463  | 2.3 | 1.9 | 2.7  | 3.1  | DHX29  | Homo sapiens DEAH (Asp-Glu-Ala-His) box polypeptide 29 (DHX29), mRNA [NM_019030]                                                            | 54505 |



|             |     |     |     |      |       |                                                                                                        |        |
|-------------|-----|-----|-----|------|-------|--------------------------------------------------------------------------------------------------------|--------|
| A_23_P57697 | 1.4 | 2.4 | 1.1 | -1.2 | DHX36 | Homo sapiens DEAH (Asp-Glu-Ala-His) box polypeptide 36 (DHX36), transcript variant 1, mRNA [NM_020865] | 170506 |
| A_23_P13914 | 7.6 | 4.5 | 1.1 | 4.1  | DHX37 | Homo sapiens DEAH (Asp-Glu-Ala-His) box polypeptide 37 (DHX37), mRNA [NM_032656]                       | 57647  |
| A_23_P38011 | 2.6 | 4.3 | 2.0 | -1.4 | DHX38 | Homo sapiens DEAH (Asp-Glu-Ala-His) box polypeptide 38 (DHX38), mRNA [NM_014003]                       | 9785   |

|              |     |      |      |      |       |                                                                                                        |       |
|--------------|-----|------|------|------|-------|--------------------------------------------------------------------------------------------------------|-------|
| A_23_P390343 | 2.4 | 1.1  | 1.5  | 1.9  | DHX40 | Homo sapiens DEAH (Asp-Glu-Ala-His) box polypeptide 40 (DHX40), transcript variant 1, mRNA [NM_024612] | 79665 |
| A_23_P16908  | 1.1 | -2.2 | -2.3 | -2.0 | DHX57 | Homo sapiens DEAH (Asp-Glu-Ala-Asp/His) box polypeptide 57 (DHX57), mRNA [NM_198963]                   | 90957 |
| A_24_P808534 | 1.7 | -1.6 | 2.9  | 1.5  | DHX9  | Homo sapiens DEAH (Asp-Glu-Ala-His) box polypeptide 9 (DHX9), transcript variant 1, mRNA [NM_001357]   | 1660  |

|              |      |      |      |      |        |                                                                                                   |       |
|--------------|------|------|------|------|--------|---------------------------------------------------------------------------------------------------|-------|
| A_23_P213344 | 1.1  | -2.5 | -1.8 | -1.7 | DIAPH1 | Homo sapiens diaphanous homolog 1 (Drosophila) (DIAPH1), transcript variant 1, mRNA [NM_005219]   | 1729  |
| A_23_P85004  | -1.0 | 2.0  | 1.2  | -1.1 | DIAPH2 | Homo sapiens diaphanous homolog 2 (Drosophila) (DIAPH2), transcript variant 12C, mRNA [NM_007309] | 1730  |
| A_23_P162719 | 1.1  | -3.7 | -2.8 | 1.4  | DIAPH3 | Homo sapiens diaphanous homolog 3 (Drosophila) (DIAPH3), transcript variant 2, mRNA [NM_030932]   | 81624 |

|              |      |      |      |      |           |                                                                                                    |        |
|--------------|------|------|------|------|-----------|----------------------------------------------------------------------------------------------------|--------|
| A_23_P419254 | -1.9 | 1.1  | -2.1 | -1.3 | DIAPH3    | Homo sapiens diaphanous homolog 3 (Drosophila) (DIAPH3), transcript variant 2, mRNA [NM_030932]    | 81624  |
| A_32_P64919  | 1.0  | -1.0 | -2.7 | -7.4 | DIAPH3    | Homo sapiens diaphanous homolog 3 (Drosophila) (DIAPH3), transcript variant 1, mRNA [NM_001042517] | 81624  |
| A_32_P79313  | -1.2 | -1.3 | -2.6 | -1.8 | DICER1-AS | Homo sapiens cDNA clone IMAGE:5270177, with apparent retained intron. [BC040596]                   | 400242 |

|              |      |      |      |      |           |                                                                                                |        |
|--------------|------|------|------|------|-----------|------------------------------------------------------------------------------------------------|--------|
| A_24_P678418 | 3.5  | 1.2  | 1.2  | 1.0  | DICER1-AS | Homo sapiens DICER1 antisense RNA (non-protein coding) (DICER1-AS), non-coding RNA [NR_015415] | 400242 |
| A_24_P944144 | -1.0 | -3.6 | -1.1 | -1.0 | DIDO1     | Homo sapiens death inducer-obliterator 1 (DIDO1), transcript variant 3, mRNA [NM_080797]       | 11083  |
| A_24_P322611 | -3.4 | 1.9  | 1.8  | 1.9  | DIDO1     | Homo sapiens death inducer-obliterator 1 (DIDO1), transcript variant 1, mRNA [NM_022105]       | 11083  |

|              |     |      |      |      |       |                                                                                                                      |       |
|--------------|-----|------|------|------|-------|----------------------------------------------------------------------------------------------------------------------|-------|
| A_23_P395426 | 2.5 | -1.0 | -1.1 | -1.1 | DIDO1 | Homo sapiens death inducer-obliterator 1 (DIDO1), transcript variant 1, mRNA [NM_022105]                             | 11083 |
| A_23_P45811  | 2.5 | 3.0  | 1.8  | 4.3  | DIO1  | Homo sapiens deiodinase, iodothyronine, type I (DIO1), transcript variant 1, mRNA [NM_000792]                        | 1733  |
| A_23_P68752  | 1.7 | 2.0  | 1.8  | -1.0 | DIP2A | Homo sapiens DIP2 disco-interacting protein 2 homolog A (Drosophila) (DIP2A), transcript variant 1, mRNA [NM_015151] | 23181 |

|              |     |      |      |      |       |                                                                                                                |        |
|--------------|-----|------|------|------|-------|----------------------------------------------------------------------------------------------------------------|--------|
| A_23_P131139 | 1.0 | 2.4  | -1.2 | 1.9  | DIRC1 | Homo sapiens disrupted in renal carcinoma 1 (DIRC1), mRNA [NM_052952]                                          | 116093 |
| A_23_P80778  | 1.1 | -1.1 | -5.6 | -1.3 | DIRC2 | Homo sapiens disrupted in renal carcinoma 2 (DIRC2), mRNA [NM_032839]                                          | 84925  |
| A_24_P395317 | 3.3 | 4.8  | 3.1  | 2.0  | DIS3  | Homo sapiens DIS3 mitotic control homolog (S. cerevisiae) (DIS3), transcript variant 1, mRNA [NM_014953]       | 22894  |
| A_23_P65741  | 3.6 | 8.2  | 9.4  | 5.9  | DIS3L | Homo sapiens DIS3 mitotic control homolog (S. cerevisiae)-like (DIS3L), transcript variant 2, mRNA [NM_133375] | 115752 |

|              |      |     |      |      |        |                                                                                                                                              |        |
|--------------|------|-----|------|------|--------|----------------------------------------------------------------------------------------------------------------------------------------------|--------|
| A_32_P232192 | 3.0  | 6.2 | 3.9  | 4.2  | DIS3L2 | DIS3<br>mitotic<br>control<br>homolog<br>(S.<br>cerevisiae)-<br>like 2<br>[Source:H<br>GNC<br>Symbol;Ac<br>c:28648]<br>[ENST0000<br>0273009] | 129563 |
| A_23_P201319 | 1.0  | 1.1 | -2.7 | -1.4 | DISP1  | Homo<br>sapiens<br>dispatche<br>d homolog<br>1<br>(Drosophil<br>a) (DISP1),<br>mRNA<br>[NM_0328<br>90]                                       | 84976  |
| A_23_P324340 | -1.1 | 1.6 | 2.3  | 1.1  | DISP2  | Homo<br>sapiens<br>dispatche<br>d homolog<br>2<br>(Drosophil<br>a) (DISP2),<br>mRNA<br>[NM_0335<br>10]                                       | 85455  |



|              |      |     |       |      |      |                                                                                                 |       |
|--------------|------|-----|-------|------|------|-------------------------------------------------------------------------------------------------|-------|
| A_23_P137143 | -6.0 | 1.1 | -1.3  | -1.2 | DKC1 | Homo sapiens dyskeratosis congenita 1, dyskerin (DKC1), transcript variant 1, mRNA [NM_001363]  | 1736  |
| A_23_P24129  | 1.1  | 1.0 | -10.1 | 1.1  | DKK1 | Homo sapiens dickkopf homolog 1 (Xenopus laevis) (DKK1), mRNA [NM_012242]                       | 22943 |
| A_24_P311679 | 1.4  | 2.2 | -1.9  | -1.5 | DKK2 | Homo sapiens dickkopf homolog 2 (Xenopus laevis) (DKK2), mRNA [NM_014421]                       | 27123 |
| A_23_P162047 | 1.2  | 7.7 | -1.1  | 1.9  | DKK3 | Homo sapiens dickkopf homolog 3 (Xenopus laevis) (DKK3), transcript variant 1, mRNA [NM_015881] | 27122 |

|              |      |      |      |      |       |                                                                                                                         |       |
|--------------|------|------|------|------|-------|-------------------------------------------------------------------------------------------------------------------------|-------|
| A_23_P36248  | -1.0 | -3.0 | -1.1 | -1.2 | DKK3  | Homo sapiens RIG mRNA, complete cds. [U32331]                                                                           | 27122 |
| A_23_P94275  | -2.5 | -1.1 | 1.2  | -3.1 | DKK4  | Homo sapiens dickkopf homolog 4 (Xenopus laevis) (DKK4), mRNA [NM_014420]                                               | 27121 |
| A_24_P372672 | 1.1  | 1.0  | -2.6 | 1.1  | DLAT  | Homo sapiens dihydrolipoamide S-acetyltransferase (DLAT), nuclear gene encoding mitochondrial protein, mRNA [NM_001931] | 1737  |
| A_23_P22072  | 3.5  | 3.5  | 2.6  | 3.6  | DLEU2 | Homo sapiens BCMS-upstream neighbor (BCMSUN) mRNA, partial sequence. [AF264787]                                         | 8847  |

|              |       |      |      |      |      |                                                                                                 |      |
|--------------|-------|------|------|------|------|-------------------------------------------------------------------------------------------------|------|
| A_24_P131752 | -16.8 | 1.0  | -1.0 | 1.2  | DLG1 | Homo sapiens discs, large homolog 1 (Drosophila) (DLG1), transcript variant 2, mRNA [NM_004087] | 1739 |
| A_24_P945283 | 1.0   | -2.5 | -1.1 | -1.3 | DLG3 | Homo sapiens discs, large homolog 3 (Drosophila) (DLG3), transcript variant 1, mRNA [NM_021120] | 1741 |
| A_23_P218398 | 1.4   | 5.6  | 7.0  | 4.5  | DLG4 | discs, large homolog 4 (Drosophila) [Source:HGNC Symbol;Acc:2903] [ENST00000485100]             | 1742 |

|              |      |      |      |      |        |                                                                                                                      |       |
|--------------|------|------|------|------|--------|----------------------------------------------------------------------------------------------------------------------|-------|
| A_23_P411102 | 1.0  | 1.4  | -2.5 | 1.3  | DLG4   | Homo sapiens discs, large homolog 4 (Drosophila) (DLG4), transcript variant 1, mRNA [NM_001365]                      | 1742  |
| A_24_P216253 | -9.5 | -1.1 | -1.3 | -1.7 | DLGAP4 | Homo sapiens discs, large (Drosophila) homolog-associated protein 4 (DLGAP4), transcript variant 1, mRNA [NM_014902] | 22839 |
| A_23_P210419 | -1.1 | -1.7 | 2.7  | 1.8  | DLGAP4 | Homo sapiens discs, large (Drosophila) homolog-associated protein 4 (DLGAP4), transcript variant 1, mRNA [NM_014902] | 22839 |

|              |      |      |      |      |      |                                                                                       |       |
|--------------|------|------|------|------|------|---------------------------------------------------------------------------------------|-------|
| A_23_P167920 | 1.0  | -3.1 | -1.1 | -1.1 | DLL1 | Homo sapiens delta-like 1 (Drosophila) (DLL1), mRNA [NM_005618]                       | 28514 |
| A_24_P57047  | -1.0 | -4.2 | -1.1 | -1.0 | DLL3 | Homo sapiens delta-like 3 (Drosophila) (DLL3), transcript variant 2, mRNA [NM_203486] | 10683 |
| A_32_P142818 | 1.0  | -2.2 | -1.9 | 1.2  | DLX1 | Homo sapiens distal-less homeobox 1 (DLX1), transcript variant 1, mRNA [NM_178120]    | 1745  |
| A_23_P28595  | -1.2 | 1.1  | -4.4 | -1.9 | DLX2 | Homo sapiens distal-less homeobox 2 (DLX2), mRNA [NM_004405]                          | 1746  |

|              |      |      |      |      |       |                                                                                                           |       |
|--------------|------|------|------|------|-------|-----------------------------------------------------------------------------------------------------------|-------|
| A_23_P28598  | 1.2  | -1.7 | 1.2  | -5.2 | DLX2  | Homo sapiens distal-less homeobox 2 (DLX2), mRNA [NM_004405]                                              | 1746  |
| A_23_P308552 | 2.1  | 2.3  | -1.6 | 1.4  | DLX3  | Homo sapiens distal-less homeobox 3 (DLX3), mRNA [NM_005220]                                              | 1747  |
| A_23_P388780 | 2.2  | 1.3  | 2.2  | -2.0 | DMAP1 | Homo sapiens DNA methyltransferase 1 associated protein 1 (DMAP1), transcript variant 1, mRNA [NM_019100] | 55929 |
| A_23_P586    | -8.4 | -2.3 | -1.8 | -1.0 | DMAP1 | Homo sapiens DNA methyltransferase 1 associated protein 1 (DMAP1), transcript variant 1, mRNA [NM_019100] | 55929 |

|              |      |      |      |      |       |                                                                                                                                 |        |
|--------------|------|------|------|------|-------|---------------------------------------------------------------------------------------------------------------------------------|--------|
| A_23_P500542 | 1.0  | -5.4 | 1.0  | 1.2  | DMBX1 | Homo sapiens diencephalon/mesencephalon homeobox 1 (DMBX1), transcript variant 2, mRNA [NM_147192]                              | 127343 |
| A_24_P288612 | -5.0 | -2.0 | -1.1 | 1.3  | DMC1  | Homo sapiens DMC1 dosage suppressor of mck1 homolog, meiosis-specific homologous recombination (yeast) (DMC1), mRNA [NM_007068] | 11144  |
| A_23_P321860 | -1.0 | -2.2 | -1.0 | -1.0 | DMD   | Homo sapiens dystrophin (DMD), transcript variant Dp40, mRNA [NM_004019]                                                        | 1756   |

|              |      |      |      |     |        |                                                                                                                   |       |
|--------------|------|------|------|-----|--------|-------------------------------------------------------------------------------------------------------------------|-------|
| A_23_P257803 | 2.3  | 4.1  | 1.7  | 1.9 | DMGDH  | Homo sapiens dimethylglycine dehydrogenase (DMGDH), nuclear gene encoding mitochondrial protein, mRNA [NM_013391] | 29958 |
| A_32_P213459 | 2.4  | 10.1 | 6.2  | 6.6 | DMRT2  | Homo sapiens doublesex and mab-3 related transcription factor 2 (DMRT2), transcript variant 1, mRNA [NM_006557]   | 10655 |
| A_23_P417821 | -2.1 | -1.0 | -1.0 | 1.0 | DMRTB1 | Homo sapiens DMRT-like family B with proline-rich C-terminal, 1 (DMRTB1), mRNA [NM_033067]                        | 63948 |



|              |      |      |      |      |       |                                                                                                               |      |
|--------------|------|------|------|------|-------|---------------------------------------------------------------------------------------------------------------|------|
| A_23_P8664   | -1.0 | -1.0 | -3.5 | -1.0 | DMTF1 | Homo sapiens cyclin D binding myb-like transcription factor 1 (DMTF1), transcript variant 1, mRNA [NM_021145] | 9988 |
| A_23_P56010  | 1.7  | 2.2  | 1.6  | 1.6  | DMWD  | Homo sapiens dystrophia myotonica, WD repeat containing (DMWD), mRNA [NM_004943]                              | 1762 |
| A_23_P250571 | -1.5 | 1.0  | -1.0 | -3.9 | DMXL1 | Homo sapiens Dmx-like 1 (DMXL1), mRNA [NM_005509]                                                             | 1657 |
| A_24_P101128 | 1.0  | 1.0  | -2.6 | -2.4 | DMXL1 | Homo sapiens Dmx-like 1 (DMXL1), mRNA [NM_005509]                                                             | 1657 |

|              |      |      |      |      |        |                                                                                     |       |
|--------------|------|------|------|------|--------|-------------------------------------------------------------------------------------|-------|
| A_24_P366107 | -1.3 | -1.3 | -2.9 | -1.3 | DNA2   | Homo sapiens DNA replication helicase 2 homolog (yeast) (DNA2), mRNA [NM_001080449] | 1763  |
| A_23_P18213  | -2.1 | -2.5 | -1.6 | -2.5 | DNAH1  | Homo sapiens dynein, axonemal, heavy chain 1 (DNAH1), mRNA [NM_015512]              | 25981 |
| A_32_P224253 | 1.1  | -2.9 | -1.1 | -1.0 | DNAH11 | Homo sapiens dynein, axonemal, heavy chain 11 (DNAH11), mRNA [NM_003777]            | 8701  |
| A_23_P93866  | 1.1  | 1.2  | -4.5 | 1.0  | DNAH11 | Homo sapiens dynein, axonemal, heavy chain 11 (DNAH11), mRNA [NM_003777]            | 8701  |

|              |      |      |      |      |        |                                                                                                |        |
|--------------|------|------|------|------|--------|------------------------------------------------------------------------------------------------|--------|
| A_24_P169402 | 1.1  | 1.1  | 1.0  | 2.2  | DNAH12 | Homo sapiens dynein, axonemal, heavy chain 12 (DNAH12), transcript variant 1, mRNA [NM_178504] | 201625 |
| A_32_P14721  | -1.0 | -1.0 | -1.0 | -2.7 | DNAH12 | Homo sapiens dynein, axonemal, heavy chain 12 (DNAH12), transcript variant 1, mRNA [NM_178504] | 201625 |
| A_23_P333951 | -3.6 | -1.2 | -1.1 | -1.7 | DNAH14 | Homo sapiens dynein, axonemal, heavy chain 14 (DNAH14), transcript variant 3, mRNA [NM_144989] | 127602 |

|              |     |      |      |      |        |                                                                                                   |        |
|--------------|-----|------|------|------|--------|---------------------------------------------------------------------------------------------------|--------|
| A_32_P87531  | 1.1 | 1.1  | 1.0  | -5.5 | DNAH14 | Homo sapiens dynein, axonemal, heavy chain 14 (DNAH14), transcript variant 2, mRNA [NM_001145154] | 127602 |
| A_24_P127691 | 3.1 | 3.0  | 2.8  | 3.0  | DNAH14 | dynein, axonemal, heavy chain 14 [Source:HGNC Symbol;Acc:2945] [ENST00000495456]                  | 127602 |
| A_23_P359457 | 3.7 | -1.3 | -1.4 | -1.4 | DNAH2  | dynein, axonemal, heavy chain 2 [Source:HGNC Symbol;Acc:2948] [ENST00000082259]                   | 146754 |
| A_24_P419286 | 4.2 | 2.8  | 2.3  | 4.0  | DNAH3  | Homo sapiens dynein, axonemal, heavy chain 3 (DNAH3), mRNA [NM_017539]                            | 55567  |

|              |       |      |      |      |        |                                                                                     |       |
|--------------|-------|------|------|------|--------|-------------------------------------------------------------------------------------|-------|
| A_24_P120462 | -1.9  | -1.0 | -1.8 | -2.3 | DNAH5  | Homo sapiens dynein, axonemal, heavy chain 5 (DNAH5), mRNA [NM_001369]              | 1767  |
| A_32_P351037 | -14.4 | 1.0  | 1.0  | 1.1  | DNAH7  | dynein, axonemal, heavy chain 7 [Source:HGNC Symbol;Acc:18661] [ENST00000410072]    | 56171 |
| A_23_P169966 | -1.4  | 1.8  | 2.7  | 1.4  | DNAI2  | Homo sapiens mRNA for intermediate dynein chain (DNAI2 gene). [AJ295276]            | 64446 |
| A_23_P60479  | -1.1  | -2.0 | -1.4 | -2.0 | DNAJA1 | Homo sapiens DnaJ (Hsp40) homolog, subfamily A, member 1 (DNAJA1), mRNA [NM_001539] | 3301  |

|              |     |      |      |      |         |                                                                                                             |       |
|--------------|-----|------|------|------|---------|-------------------------------------------------------------------------------------------------------------|-------|
| A_23_P90062  | 1.1 | 1.0  | -2.3 | -1.0 | DNAJB1  | Homo sapiens DnaJ (Hsp40) homolog, subfamily B, member 1 (DNAJB1), mRNA [NM_006145]                         | 3337  |
| A_23_P166899 | 2.1 | -1.4 | -1.0 | 1.8  | DNAJB11 | Homo sapiens DnaJ (Hsp40) homolog, subfamily B, member 11 (DNAJB11), mRNA [NM_016306]                       | 51726 |
| A_23_P52382  | 4.3 | 4.4  | 1.8  | 3.9  | DNAJB12 | Homo sapiens DnaJ (Hsp40) homolog, subfamily B, member 12 (DNAJB12), transcript variant 2, mRNA [NM_017626] | 54788 |

|              |      |      |      |      |         |                                                                                                                |        |
|--------------|------|------|------|------|---------|----------------------------------------------------------------------------------------------------------------|--------|
| A_24_P244096 | -1.3 | -1.2 | -2.2 | -1.0 | DNAJB12 | Homo sapiens DnaJ (Hsp40) homolog, subfamily B, member 12 (DNAJB12), transcript variant 1, mRNA [NM_001002762] | 54788  |
| A_24_P102981 | -1.0 | -7.9 | -1.2 | -1.0 | DNAJB2  | Homo sapiens DnaJ (Hsp40) homolog, subfamily B, member 2 (DNAJB2), transcript variant 2, mRNA [NM_006736]      | 3300   |
| A_32_P2362   | -1.1 | 1.5  | 1.2  | 4.1  | DNAJB3  | Homo sapiens DnaJ (Hsp40) homolog, subfamily B, member 3 (DNAJB3), mRNA [NM_001001394]                         | 414061 |

|              |      |     |      |      |        |                                                                                                           |       |
|--------------|------|-----|------|------|--------|-----------------------------------------------------------------------------------------------------------|-------|
| A_23_P51339  | -4.3 | 3.4 | -2.3 | -3.7 | DNAJB4 | Homo sapiens DnaJ (Hsp40) homolog, subfamily B, member 4 (DNAJB4), mRNA [NM_007034]                       | 11080 |
| A_32_P229746 | 1.2  | 2.2 | 1.8  | -1.1 | DNAJB6 | Homo sapiens DnaJ (Hsp40) homolog, subfamily B, member 6 (DNAJB6), transcript variant 2, mRNA [NM_005494] | 10049 |
| A_23_P385063 | 2.7  | 2.6 | 2.3  | 1.9  | DNAJB6 | Homo sapiens DnaJ (Hsp40) homolog, subfamily B, member 6 (DNAJB6), transcript variant 1, mRNA [NM_058246] | 10049 |



|              |      |      |      |      |         |                                                                                                           |       |
|--------------|------|------|------|------|---------|-----------------------------------------------------------------------------------------------------------|-------|
| A_23_P215227 | -2.4 | 1.5  | -1.4 | -1.5 | DNAJB6  | Homo sapiens DnaJ (Hsp40) homolog, subfamily B, member 6 (DNAJB6), transcript variant 2, mRNA [NM_005494] | 10049 |
| A_23_P166910 | -2.5 | 1.0  | -1.6 | -1.1 | DNAJC13 | Homo sapiens DnaJ (Hsp40) homolog, subfamily C, member 13 (DNAJC13), mRNA [NM_015268]                     | 23317 |
| A_23_P140698 | -1.4 | -1.0 | -2.0 | -2.8 | DNAJC17 | Homo sapiens DnaJ (Hsp40) homolog, subfamily C, member 17 (DNAJC17), mRNA [NM_018163]                     | 55192 |

|              |      |     |      |      |         |                                                                                                             |        |
|--------------|------|-----|------|------|---------|-------------------------------------------------------------------------------------------------------------|--------|
| A_32_P149251 | 5.8  | 1.2 | 2.7  | 2.2  | DNAJC18 | Homo sapiens DnaJ (Hsp40) homolog, subfamily C, member 18 (DNAJC18), mRNA [NM_152686]                       | 202052 |
| A_23_P121396 | -3.2 | 1.1 | -1.0 | -1.0 | DNAJC19 | Homo sapiens DnaJ (Hsp40) homolog, subfamily C, member 19 (DNAJC19), transcript variant 1, mRNA [NM_145261] | 131118 |
| A_23_P431890 | 1.3  | 2.4 | 1.0  | 1.3  | DNAJC19 | Homo sapiens DnaJ (Hsp40) homolog, subfamily C, member 19 (DNAJC19), transcript variant 1, mRNA [NM_145261] | 131118 |

|              |      |      |      |      |         |                                                                                                                |        |
|--------------|------|------|------|------|---------|----------------------------------------------------------------------------------------------------------------|--------|
| A_23_P254573 | -2.9 | -3.0 | -1.3 | -1.6 | DNAJC2  | Homo sapiens DnaJ (Hsp40) homolog, subfamily C, member 2 (DNAJC2), transcript variant 1, mRNA [NM_014377]      | 27000  |
| A_32_P407245 | 6.0  | 3.4  | 1.6  | 1.1  | DNAJC22 | Homo sapiens DnaJ (Hsp40) homolog, subfamily C, member 22 (DNAJC22), mRNA [NM_024902]                          | 79962  |
| A_23_P397019 | 1.1  | 1.1  | -4.1 | 1.0  | DNAJC25 | Homo sapiens DnaJ (Hsp40) homolog, subfamily C, member 25 (DNAJC25), transcript variant 1, mRNA [NM_001015882] | 548645 |

|             |      |      |      |      |         |                                                                                                             |       |
|-------------|------|------|------|------|---------|-------------------------------------------------------------------------------------------------------------|-------|
| A_23_P17275 | -1.5 | -1.2 | -5.3 | -1.1 | DNAJC27 | Homo sapiens DnaJ (Hsp40) homolog, subfamily C, member 27 (DNAJC27), transcript variant 1, mRNA [NM_016544] | 51277 |
| A_23_P68700 | 1.3  | 1.3  | -2.7 | 1.0  | DNAJC28 | Homo sapiens DnaJ (Hsp40) homolog, subfamily C, member 28 (DNAJC28), transcript variant 1, mRNA [NM_017833] | 54943 |

|              |      |     |      |     |            |                                                                                                                                      |           |
|--------------|------|-----|------|-----|------------|--------------------------------------------------------------------------------------------------------------------------------------|-----------|
| A_24_P51184  | 3.0  | 3.0 | 2.6  | 1.1 | DNAJC3     | Homo sapiens DnaJ (Hsp40) homolog, subfamily C, member 3, mRNA (cDNA clone IMAGE:5218144), with apparent retained intron. [BC033823] | 5611      |
| A_24_P218006 | -1.6 | 3.0 | 3.0  | 3.0 | DNAJC30    | Homo sapiens DnaJ (Hsp40) homolog, subfamily C, member 30 (DNAJC30), mRNA [NM_032317]                                                | 84277     |
| A_32_P37461  | 1.3  | 1.3 | -2.2 | 1.0 | DNAJC3-AS1 | PREDICTED: Homo sapiens DNAJC3 antisense RNA 1 (non-protein coding) (DNAJC3-AS1), miscRNA [XR_109147]                                | 100289274 |

|              |       |      |      |     |         |                                                                                           |       |
|--------------|-------|------|------|-----|---------|-------------------------------------------------------------------------------------------|-------|
| A_23_P202769 | 2.8   | -1.1 | 1.1  | 2.3 | DNAJC4  | Homo sapiens DnaJ (Hsp40) homolog, subfamily C, member 4 (DNAJC4), mRNA [NM_005528]       | 3338  |
| A_24_P355145 | -2.2  | 1.0  | 1.0  | 1.0 | DNAJC5B | Homo sapiens DnaJ (Hsp40) homolog, subfamily C, member 5 beta (DNAJC5B), mRNA [NM_033105] | 85479 |
| A_23_P95359  | -15.5 | 1.0  | -1.2 | 1.1 | DNAJC6  | Homo sapiens DnaJ (Hsp40) homolog, subfamily C, member 6 (DNAJC6), mRNA [NM_014787]       | 9829  |

|              |      |      |      |      |        |                                                                                              |       |
|--------------|------|------|------|------|--------|----------------------------------------------------------------------------------------------|-------|
| A_23_P37137  | 2.5  | 2.5  | 2.2  | -1.1 | DNAJC8 | Homo sapiens DnaJ (Hsp40) homolog, subfamily C, member 8 (DNAJC8), mRNA [NM_014280]          | 22826 |
| A_23_P46455  | 1.2  | -1.1 | -1.7 | 3.5  | DNAJC8 | Homo sapiens DnaJ (Hsp40) homolog, subfamily C, member 8 (DNAJC8), mRNA [NM_014280]          | 22826 |
| A_32_P157192 | -2.2 | -3.7 | -3.8 | -2.0 | DNAJC8 | Homo sapiens DnaJ (Hsp40) homolog, subfamily C, member 8 (DNAJC8), mRNA [NM_014280]          | 22826 |
| A_23_P25913  | 1.1  | -3.2 | 1.0  | -1.4 | DNAL1  | Homo sapiens dynein, axonemal, light chain 1 (DNAL1), transcript variant 1, mRNA [NM_031427] | 83544 |

|              |      |       |      |      |          |                                                                                             |       |
|--------------|------|-------|------|------|----------|---------------------------------------------------------------------------------------------|-------|
| A_23_P17880  | 6.0  | -1.1  | 1.4  | 1.2  | DNAL4    | Homo sapiens dynein, axonemal, light chain 4 (DNAL4), mRNA [NM_005740]                      | 10126 |
| A_23_P85164  | 2.3  | 1.3   | -1.6 | 1.4  | DNASE1L1 | Homo sapiens deoxyribo nuclease I-like 1 (DNASE1L1), transcript variant 1, mRNA [NM_006730] | 1774  |
| A_23_P257993 | 1.0  | -12.2 | -1.2 | -1.7 | DNASE1L3 | Homo sapiens deoxyribo nuclease I-like 3 (DNASE1L3), mRNA [NM_004944]                       | 1776  |
| A_23_P126677 | -1.0 | -4.7  | 1.5  | -1.0 | DNASE2B  | Homo sapiens deoxyribo nuclease II beta (DNASE2B), transcript variant 1, mRNA [NM_021233]   | 58511 |



|              |       |      |      |      |       |                                                                                          |        |
|--------------|-------|------|------|------|-------|------------------------------------------------------------------------------------------|--------|
| A_24_P943352 | -15.7 | 1.3  | -1.2 | -1.2 | DNHD1 | Homo sapiens dynein heavy chain domain 1 (DNHD1), transcript variant 1, mRNA [NM_144666] | 144132 |
| A_32_P360193 | 5.7   | 8.9  | 3.4  | 6.9  | DNHD1 | Homo sapiens dynein heavy chain domain 1 (DNHD1), transcript variant 1, mRNA [NM_144666] | 144132 |
| A_23_P316472 | 1.0   | 1.2  | -1.3 | -2.2 | DNHD1 | Homo sapiens dynein heavy chain domain 1 (DNHD1), transcript variant 1, mRNA [NM_144666] | 144132 |
| A_23_P367586 | 11.1  | 10.9 | 8.5  | 9.2  | DNHD1 | Homo sapiens dynein heavy chain domain 1 (DNHD1), transcript variant 2, mRNA [NM_173589] | 144132 |

|              |     |      |      |      |         |                                                                                                   |        |
|--------------|-----|------|------|------|---------|---------------------------------------------------------------------------------------------------|--------|
| A_23_P135273 | 2.2 | -1.2 | 1.5  | -1.6 | DNM1    | Homo sapiens dynamin 1 (DNM1), transcript variant 2, mRNA [NM_001005336]                          | 1759   |
| A_24_P50091  | 1.6 | -1.7 | -2.3 | -1.1 | DNM1P46 | Homo sapiens DNM1 pseudogene 46 (DNM1P46), non-coding RNA [NR_003260]                             | 196968 |
| A_23_P328206 | 1.2 | -1.9 | -2.3 | -1.6 | DNMBP   | Homo sapiens dynamin binding protein (DNMBP), mRNA [NM_015221]                                    | 23268  |
| A_24_P408083 | 3.0 | 2.4  | 1.1  | 1.0  | DNMT1   | Homo sapiens DNA (cytosine-5)-methyltransferase 1 (DNMT1), transcript variant 2, mRNA [NM_001379] | 1786   |

|              |      |      |      |      |        |                                                                                                   |       |
|--------------|------|------|------|------|--------|---------------------------------------------------------------------------------------------------|-------|
| A_23_P142676 | -1.5 | -2.2 | -2.0 | -1.6 | DNPEP  | Homo sapiens aspartyl aminopeptidase (DNPEP), mRNA [NM_012100]                                    | 23549 |
| A_23_P409489 | 2.6  | 1.3  | 1.4  | 1.1  | DNTT   | Homo sapiens deoxynucleotidyltransferase, terminal (DNTT), transcript variant 1, mRNA [NM_004088] | 1791  |
| A_23_P16722  | -1.8 | 1.1  | 1.1  | -3.2 | DOCK10 | Homo sapiens dedicator of cytokinesis 10 (DOCK10), mRNA [NM_014689]                               | 55619 |
| A_24_P263653 | 1.2  | 1.3  | -2.4 | 1.2  | DOCK2  | Homo sapiens dedicator of cytokinesis 2 (DOCK2), mRNA [NM_004946]                                 | 1794  |

|              |     |     |       |      |       |                                                                   |      |
|--------------|-----|-----|-------|------|-------|-------------------------------------------------------------------|------|
| A_24_P153643 | 6.7 | 6.5 | 5.9   | 5.0  | DOCK3 | Homo sapiens dedicator of cytokinesis 3 (DOCK3), mRNA [NM_004947] | 1795 |
| A_24_P272845 | 1.9 | 1.2 | 2.7   | -1.4 | DOCK3 | Homo sapiens dedicator of cytokinesis 3 (DOCK3), mRNA [NM_004947] | 1795 |
| A_23_P364580 | 1.2 | 1.2 | -13.4 | -1.2 | DOCK4 | Homo sapiens dedicator of cytokinesis 4 (DOCK4), mRNA [NM_014705] | 9732 |
| A_24_P324886 | 2.1 | 2.2 | 2.1   | 1.4  | DOCK4 | Homo sapiens dedicator of cytokinesis 4 (DOCK4), mRNA [NM_014705] | 9732 |

|              |       |      |      |     |       |                                                                   |       |
|--------------|-------|------|------|-----|-------|-------------------------------------------------------------------|-------|
| A_24_P350245 | 9.3   | 12.0 | 3.6  | 3.3 | DOCK5 | Homo sapiens dedicator of cytokinesis 5 (DOCK5), mRNA [NM_024940] | 80005 |
| A_23_P67299  | -24.5 | 1.6  | 1.5  | 1.0 | DOCK6 | Homo sapiens dedicator of cytokinesis 6 (DOCK6), mRNA [NM_020812] | 57572 |
| A_23_P331348 | -5.7  | 1.0  | 1.2  | 1.7 | DOCK7 | Homo sapiens dedicator of cytokinesis 7 (DOCK7), mRNA [NM_033407] | 85440 |
| A_32_P230547 | 3.0   | 2.8  | -1.0 | 2.5 | DOCK7 | Homo sapiens dedicator of cytokinesis 7 (DOCK7), mRNA [NM_033407] | 85440 |

|              |     |     |     |     |       |                                                                                         |       |
|--------------|-----|-----|-----|-----|-------|-----------------------------------------------------------------------------------------|-------|
| A_24_P331998 | 1.1 | 1.1 | 2.4 | 1.0 | DOCK8 | Homo sapiens dedicator of cytokinesis 8 (DOCK8), transcript variant 1, mRNA [NM_203447] | 81704 |
| A_23_P353888 | 2.0 | 3.0 | 3.3 | 2.3 | DOCK8 | Homo sapiens dedicator of cytokinesis 8 (DOCK8), transcript variant 1, mRNA [NM_203447] | 81704 |
| A_23_P162766 | 3.9 | 3.9 | 4.0 | 3.9 | DOCK9 | Homo sapiens dedicator of cytokinesis 9 (DOCK9), transcript variant 1, mRNA [NM_015296] | 23348 |

|              |      |      |      |      |      |                                                                                                                        |       |
|--------------|------|------|------|------|------|------------------------------------------------------------------------------------------------------------------------|-------|
| A_23_P5610   | 5.0  | 4.7  | 3.1  | -4.3 | DOK1 | Homo sapiens docking protein 1, 62kDa (downstream of tyrosine kinase 1) (DOK1), transcript variant 1, mRNA [NM_001381] | 1796  |
| A_23_P134851 | -2.0 | -2.9 | -4.7 | 1.4  | DOK2 | Homo sapiens docking protein 2, 56kDa (DOK2), mRNA [NM_003974]                                                         | 9046  |
| A_23_P133506 | 2.6  | 2.7  | 2.8  | 2.4  | DOK3 | Homo sapiens docking protein 3 (DOK3), transcript variant 1, mRNA [NM_024872]                                          | 79930 |
| A_24_P48069  | 1.1  | -2.1 | 1.3  | -1.0 | DOK4 | Homo sapiens docking protein 4 (DOK4), mRNA [NM_018110]                                                                | 55715 |

|              |     |      |      |      |        |                                                                                                    |       |
|--------------|-----|------|------|------|--------|----------------------------------------------------------------------------------------------------|-------|
| A_23_P77381  | 1.2 | -1.8 | -4.2 | -5.5 | DOK4   | Homo sapiens docking protein 4 (DOK4), mRNA [NM_018110]                                            | 55715 |
| A_23_P10870  | 3.0 | 2.4  | 2.5  | 1.7  | DOLK   | Homo sapiens dolichol kinase (DOLK), mRNA [NM_014908]                                              | 22845 |
| A_23_P386764 | 1.1 | -2.6 | -1.0 | -1.0 | DOLPP1 | Homo sapiens dolichyl pyrophosphate phosphatase 1 (DOLPP1), transcript variant 1, mRNA [NM_020438] | 57171 |
| A_23_P330017 | 1.1 | 1.0  | -1.3 | -2.1 | DOLPP1 | Homo sapiens dolichyl pyrophosphate phosphatase 1 (DOLPP1), transcript variant 1, mRNA [NM_020438] | 57171 |



|              |      |      |      |      |        |                                                                                                |       |
|--------------|------|------|------|------|--------|------------------------------------------------------------------------------------------------|-------|
| A_32_P181020 | 1.4  | 1.1  | -2.2 | -1.9 | DOM3Z  | Homo sapiens dom-3 homolog Z (C. elegans) (DOM3Z), mRNA [NM_005510]                            | 1797  |
| A_23_P434268 | 1.0  | -2.1 | -1.0 | -1.0 | DOPEY1 | Homo sapiens dopey family member 1 (DOPEY1), transcript variant 2, mRNA [NM_001199942]         | 23033 |
| A_23_P253586 | 9.8  | 9.5  | 8.8  | 9.4  | DOPEY2 | Homo sapiens dopey family member 2 (DOPEY2), mRNA [NM_005128]                                  | 9980  |
| A_24_P936875 | -1.6 | -1.8 | 1.3  | -3.6 | DOT1L  | Homo sapiens DOT1-like, histone H3 methyltransferase (S. cerevisiae) (DOT1L), mRNA [NM_032482] | 84444 |

|              |       |      |      |      |       |                                                                                                                |        |
|--------------|-------|------|------|------|-------|----------------------------------------------------------------------------------------------------------------|--------|
| A_23_P129413 | -22.4 | 1.5  | -2.0 | -2.9 | DPEP3 | Homo sapiens dipeptidase 3 (DPEP3), transcript variant 1, mRNA [NM_022357]                                     | 64180  |
| A_23_P307392 | -2.2  | 1.4  | 1.9  | 1.5  | DPF3  | Homo sapiens cDNA FLJ14079 fis, clone HEMBB1002134, weakly similar to ZINC-FINGER PROTEIN NEURO-D4. [AK024141] | 8110   |
| A_24_P225907 | 1.0   | -1.0 | -1.0 | -3.8 | DPH3  | Homo sapiens DPH3, KTI11 homolog (S. cerevisiae) (DPH3), transcript variant 1, mRNA [NM_206831]                | 285381 |

|              |      |     |     |      |        |                                                                                                                |           |
|--------------|------|-----|-----|------|--------|----------------------------------------------------------------------------------------------------------------|-----------|
| A_23_P258814 | 1.3  | 1.6 | 2.4 | -1.0 | DPH3P1 | Homo sapiens DPH3, KT111 homolog (S. cerevisiae) pseudogene 1 (DPH3P1), mRNA [NM_080750]                       | 100132911 |
| A_23_P148821 | -3.0 | 1.2 | 1.1 | 1.1  | DPH5   | Homo sapiens DPH5 homolog (S. cerevisiae) (DPH5), transcript variant 1, mRNA [NM_001077394]                    | 51611     |
| A_23_P217079 | -2.0 | 1.4 | 2.1 | -2.1 | DPM2   | Homo sapiens dolichyl-phosphate mannosyltransferase polypeptide 2, regulatory subunit (DPM2), mRNA [NM_003863] | 8818      |

|              |      |      |      |      |       |                                                                                                                  |       |
|--------------|------|------|------|------|-------|------------------------------------------------------------------------------------------------------------------|-------|
| A_24_P179925 | -1.4 | -1.7 | -3.3 | -2.1 | DPM3  | Homo sapiens dolichyl-phosphate mannosyltransferase polypeptide 3 (DPM3), transcript variant 1, mRNA [NM_018973] | 54344 |
| A_23_P250506 | 3.3  | 7.1  | 8.0  | 1.5  | DPM3  | Homo sapiens dolichyl-phosphate mannosyltransferase polypeptide 3 (DPM3), transcript variant 1, mRNA [NM_018973] | 54344 |
| A_23_P102278 | 1.0  | 1.0  | 1.0  | -8.7 | DPP10 | Homo sapiens dipeptidyl-peptidase 10 (non-functional) (DPP10), transcript variant 1, mRNA [NM_020868]            | 57628 |

|              |      |     |      |      |       |                                                                                                       |       |
|--------------|------|-----|------|------|-------|-------------------------------------------------------------------------------------------------------|-------|
| A_24_P140057 | 3.9  | 3.5 | 2.5  | 4.0  | DPP10 | Homo sapiens dipeptidyl-peptidase 10 (non-functional) (DPP10), transcript variant 1, mRNA [NM_020868] | 57628 |
| A_23_P170888 | -2.3 | 1.0 | -1.0 | -5.6 | DPP6  | Homo sapiens dipeptidyl-peptidase 6 (DPP6), transcript variant 3, mRNA [NM_001039350]                 | 1804  |
| A_24_P6552   | 2.0  | 3.1 | 2.0  | 1.0  | DPP6  | Homo sapiens dipeptidyl-peptidase 6 (DPP6), transcript variant 3, mRNA [NM_001039350]                 | 1804  |
| A_23_P32975  | 1.6  | 1.0 | -3.7 | 1.2  | DPP7  | Homo sapiens dipeptidyl-peptidase 7 (DPP7), mRNA [NM_013379]                                          | 29952 |

|              |      |      |      |      |           |                                                                                              |           |
|--------------|------|------|------|------|-----------|----------------------------------------------------------------------------------------------|-----------|
| A_24_P130066 | -4.8 | -4.7 | -4.7 | -5.0 | DPP8      | Homo sapiens dipeptidyl-peptidase 8 (DPP8), transcript variant 2, mRNA [NM_017743]           | 54878     |
| A_23_P200741 | 3.3  | 1.3  | -2.6 | 2.0  | DPT       | Homo sapiens dermatopontin (DPT), mRNA [NM_001937]                                           | 1805      |
| A_24_P652033 | 2.1  | 2.0  | 1.8  | -1.1 | DPY19L1P1 | Homo sapiens dpy-19-like 1 pseudogene 1 (C. elegans) (DPY19L1P1), non-coding RNA [NR_036680] | 100129460 |
| A_23_P374250 | -3.1 | -1.1 | -1.7 | -8.4 | DPY19L2   | Homo sapiens dpy-19-like 2 (C. elegans) (DPY19L2), mRNA [NM_173812]                          | 283417    |

|              |     |      |      |      |           |                                                                                                                    |        |
|--------------|-----|------|------|------|-----------|--------------------------------------------------------------------------------------------------------------------|--------|
| A_32_P195850 | 1.1 | -1.5 | 2.1  | -3.0 | DPY19L2   | Homo sapiens dpy-19-like 2 (C. elegans) (DPY19L2), mRNA [NM_173812]                                                | 283417 |
| A_24_P186608 | 1.0 | -5.1 | -1.7 | 2.0  | DPY19L2P2 | Homo sapiens dpy-19-like 2 pseudogene 2 (C. elegans) (DPY19L2P2), transcript variant 2, non-coding RNA [NR_003561] | 349152 |
| A_32_P78385  | 1.6 | -1.0 | -2.2 | 1.4  | DPY19L2P2 | Homo sapiens dpy-19-like 2 pseudogene 2 (C. elegans) (DPY19L2P2), transcript variant 1, non-coding RNA [NR_027768] | 349152 |

|              |      |      |      |      |           |                                                                                                                    |        |
|--------------|------|------|------|------|-----------|--------------------------------------------------------------------------------------------------------------------|--------|
| A_32_P23825  | 36.7 | 35.9 | 34.6 | 35.8 | DPY19L2P2 | Homo sapiens dpy-19-like 2 pseudogene 2 (C. elegans) (DPY19L2P2), transcript variant 2, non-coding RNA [NR_003561] | 349152 |
| A_24_P156153 | 1.1  | 3.0  | 1.4  | 2.0  | DPY19L3   | Homo sapiens dpy-19-like 3 (C. elegans), mRNA (cDNA clone IMAGE:5190889), complete cds. [BC029162]                 | 147991 |
| A_24_P254101 | 1.5  | 3.6  | 3.6  | 3.7  | DPY19L3   | Homo sapiens dpy-19-like 3 (C. elegans) (DPY19L3), transcript variant 1, mRNA [NM_207325]                          | 147991 |



|              |      |      |       |      |         |                                                                                          |        |
|--------------|------|------|-------|------|---------|------------------------------------------------------------------------------------------|--------|
| A_24_P481824 | -2.5 | -1.2 | -10.8 | -1.0 | DPY19L4 | Homo sapiens dpy-19-like 4 (C. elegans) (DPY19L4), mRNA [NM_181787]                      | 286148 |
| A_32_P196047 | 1.0  | -1.0 | 3.1   | -1.1 | DPY19L4 | Homo sapiens dpy-19-like 4 (C. elegans) (DPY19L4), mRNA [NM_181787]                      | 286148 |
| A_23_P20337  | 1.1  | 2.0  | -2.1  | 1.8  | DPYSL2  | Homo sapiens dihydropyrimidinase-like 2 (DPYSL2), transcript variant 2, mRNA [NM_001386] | 1808   |
| A_23_P331049 | 1.7  | 2.8  | 1.6   | -4.8 | DPYSL4  | Homo sapiens dihydropyrimidinase-like 4 (DPYSL4), mRNA [NM_006426]                       | 10570  |

|              |      |       |      |      |       |                                                                                             |       |
|--------------|------|-------|------|------|-------|---------------------------------------------------------------------------------------------|-------|
| A_24_P381455 | 4.1  | 4.1   | 4.2  | 1.2  | DRAM1 | Homo sapiens DNA-damage regulated autophagy modulator 1 (DRAM1), mRNA [NM_018370]           | 55332 |
| A_24_P107277 | -2.0 | 3.4   | 3.1  | 1.3  | DRAP1 | Homo sapiens DR1-associated protein 1 (negative cofactor 2 alpha) (DRAP1), mRNA [NM_006442] | 10589 |
| A_23_P57733  | -1.1 | -10.3 | -1.2 | -1.2 | DRD3  | Homo sapiens dopamine receptor D3 (DRD3), transcript variant e, mRNA [NM_033663]            | 1814  |
| A_24_P25668  | 5.1  | -1.0  | 1.8  | 1.5  | DRD4  | Homo sapiens dopamine receptor D4 (DRD4), mRNA [NM_000797]                                  | 1815  |

|              |      |      |      |      |      |                                                                                       |      |
|--------------|------|------|------|------|------|---------------------------------------------------------------------------------------|------|
| A_23_P68884  | -1.6 | 2.6  | 1.6  | 2.8  | DRG1 | Homo sapiens developmentally regulated GTP binding protein 1 (DRG1), mRNA [NM_004147] | 4733 |
| A_23_P141656 | 1.8  | -2.8 | 1.2  | -3.6 | DRG2 | Homo sapiens developmentally regulated GTP binding protein 2 (DRG2), mRNA [NM_001388] | 1819 |
| A_23_P38696  | -2.5 | 1.0  | -1.0 | 1.0  | DSC1 | Homo sapiens desmocollin 1 (DSC1), transcript variant Dsc1b, mRNA [NM_004948]         | 1823 |
| A_24_P344416 | 6.9  | 10.0 | 6.5  | 9.0  | DSC3 | Homo sapiens desmocollin 3 (DSC3), transcript variant Dsc3b, mRNA [NM_024423]         | 1825 |

|              |      |      |      |      |         |                                                                                      |       |
|--------------|------|------|------|------|---------|--------------------------------------------------------------------------------------|-------|
| A_23_P47340  | 1.0  | 1.1  | -2.2 | 1.6  | DSCAML1 | Homo sapiens Down syndrome cell adhesion molecule like 1 (DSCAML1), mRNA [NM_020693] | 57453 |
| A_23_P154874 | -1.0 | -7.5 | 1.0  | -1.0 | DSCR3   | Homo sapiens Down syndrome critical region gene 3 (DSCR3), mRNA [NM_006052]          | 10311 |
| A_24_P75963  | 4.9  | 5.0  | 7.7  | 3.4  | DSCR4   | Homo sapiens Down syndrome critical region gene 4 (DSCR4), mRNA [NM_005867]          | 10281 |
| A_23_P109320 | -2.2 | -3.9 | 1.5  | -1.2 | DSCR6   | Homo sapiens Down syndrome critical region gene 6 (DSCR6), mRNA [NM_018962]          | 53820 |

|              |      |      |       |      |       |                                                                        |        |
|--------------|------|------|-------|------|-------|------------------------------------------------------------------------|--------|
| A_23_P430691 | -9.1 | -1.1 | -1.1  | 1.2  | DSCR9 | Homo sapiens mRNA, complete cds. [AB066100]                            | 257203 |
| A_23_P27265  | -1.0 | -1.0 | -1.1  | -3.0 | DSEL  | Homo sapiens dermatan sulfate epimerase-like (DSEL), mRNA [NM_032160]  | 92126  |
| A_23_P164504 | -2.9 | 1.1  | 1.1   | 1.1  | DSG1  | Homo sapiens desmoglein 1 (DSG1), mRNA [NM_001942]                     | 1828   |
| A_32_P157945 | -1.3 | -1.2 | -12.3 | -1.3 | DSP   | Homo sapiens desmoplakin (DSP), transcript variant 1, mRNA [NM_004415] | 1832   |
| A_23_P373541 | 2.2  | -2.1 | 1.9   | 1.6  | DSPP  | Homo sapiens dentin sialophosphoprotein (DSPP), mRNA [NM_014208]       | 1834   |

|              |     |       |     |     |       |                                                                                                                |       |
|--------------|-----|-------|-----|-----|-------|----------------------------------------------------------------------------------------------------------------|-------|
| A_23_P59388  | 2.1 | 1.7   | 1.3 | 1.3 | DST   | Homo sapiens dystonin (DST), transcript variant 1e, mRNA [NM_001723]                                           | 667   |
| A_23_P303718 | 4.7 | 2.3   | 2.8 | 5.9 | DST   | Homo sapiens dystonin (DST), transcript variant 1eA, mRNA [NM_015548]                                          | 667   |
| A_23_P23894  | 1.1 | -12.3 | 1.1 | 1.0 | DSTYK | Homo sapiens dual serine/threonine and tyrosine protein kinase (DSTYK), transcript variant 1, mRNA [NM_015375] | 25778 |

|              |      |      |      |      |       |                                                                                                                |        |
|--------------|------|------|------|------|-------|----------------------------------------------------------------------------------------------------------------|--------|
| A_32_P71943  | 2.7  | 1.7  | 1.9  | 2.3  | DSTYK | Homo sapiens dual serine/threonine and tyrosine protein kinase (DSTYK), transcript variant 1, mRNA [NM_015375] | 25778  |
| A_32_P787109 | -2.3 | -2.0 | 1.8  | 2.4  | DTHD1 | Homo sapiens death domain containing 1 (DTHD1), transcript variant 1, mRNA [NM_001170700]                      | 401124 |
| A_23_P394809 | 3.0  | 1.6  | 2.7  | 1.9  | DTNA  | Homo sapiens dystrobrevin, alpha (DTNA), transcript variant 1, mRNA [NM_001390]                                | 1837   |
| A_23_P210319 | -1.1 | -1.2 | -2.0 | -2.0 | DTNB  | Homo sapiens dystrobrevin, beta (DTNB), transcript variant 4, mRNA [NM_183360]                                 | 1838   |

|              |      |      |      |       |       |                                                                                      |        |
|--------------|------|------|------|-------|-------|--------------------------------------------------------------------------------------|--------|
| A_24_P70117  | 1.1  | -7.1 | -1.0 | -1.0  | DTWD1 | Homo sapiens DTW domain containing 1 (DTWD1), transcript variant 1, mRNA [NM_020234] | 56986  |
| A_32_P373557 | 1.1  | 1.0  | -1.0 | -3.9  | DTWD2 | Homo sapiens DTW domain containing 2 (DTWD2), mRNA [NM_173666]                       | 285605 |
| A_23_P36567  | -1.9 | -1.1 | 1.0  | -3.5  | DTX1  | Homo sapiens deltex homolog 1 (Drosophila) (DTX1), mRNA [NM_004416]                  | 1840   |
| A_24_P290751 | 1.1  | 1.1  | 1.1  | -23.8 | DTX1  | Homo sapiens deltex homolog 1 (Drosophila) (DTX1), mRNA [NM_004416]                  | 1840   |



|              |      |      |      |      |             |                                                                                                                           |        |
|--------------|------|------|------|------|-------------|---------------------------------------------------------------------------------------------------------------------------|--------|
| A_23_P395033 | -2.9 | 1.0  | 1.0  | 1.1  | DTX2        | Homo sapiens deltex homolog 2 (Drosophila) (DTX2), transcript variant 1, mRNA [NM_020892]                                 | 113878 |
| A_24_P6911   | -4.6 | -1.1 | -1.1 | -1.1 | DTX2P1-UPK3 | Homo sapiens DTX2P1-UPK3BP1-PMS2P11 readthrough (non-protein coding) (DTX2P1-UPK3BP1-PMS2P11), non-coding RNA [NR_023383] | 441263 |
| A_23_P336708 | 2.1  | -2.5 | 1.3  | 1.3  | DTX3        | Homo sapiens deltex homolog 3 (Drosophila) (DTX3), mRNA [NM_178502]                                                       | 196403 |

|              |      |     |      |      |       |                                                                                       |        |
|--------------|------|-----|------|------|-------|---------------------------------------------------------------------------------------|--------|
| A_23_P53247  | 2.4  | 3.2 | 1.2  | 1.2  | DTX3  | Homo sapiens deltex homolog 3 (Drosophila) (DTX3), mRNA [NM_178502]                   | 196403 |
| A_24_P941912 | 2.7  | 4.1 | 1.2  | 2.6  | DTX3L | Homo sapiens deltex 3-like (Drosophila) (DTX3L), mRNA [NM_138287]                     | 151636 |
| A_23_P255569 | 1.9  | 2.9 | 1.6  | 1.1  | DUS1L | Homo sapiens dihydrouridine synthase 1-like (S. cerevisiae) (DUS1L), mRNA [NM_022156] | 64118  |
| A_23_P215778 | -2.1 | 1.0 | -2.3 | -8.4 | DUS4L | Homo sapiens dihydrouridine synthase 4-like (S. cerevisiae) (DUS4L), mRNA [NM_181581] | 11062  |

|              |      |      |      |      |        |                                                                                                         |       |
|--------------|------|------|------|------|--------|---------------------------------------------------------------------------------------------------------|-------|
| A_23_P110712 | 3.7  | 3.6  | 3.5  | 3.2  | DUSP1  | Homo sapiens dual specificity phosphatase 1 (DUSP1), mRNA [NM_004417]                                   | 1843  |
| A_24_P182494 | -1.0 | 1.5  | -1.1 | -2.2 | DUSP10 | Homo sapiens dual specificity phosphatase 10 (DUSP10), transcript variant 1, mRNA [NM_007207]           | 11221 |
| A_23_P51856  | 1.2  | -2.4 | -1.1 | -1.1 | DUSP10 | Homo sapiens dual specificity phosphatase 10 (DUSP10), transcript variant 1, mRNA [NM_007207]           | 11221 |
| A_23_P376759 | 1.1  | 1.1  | -2.5 | 1.8  | DUSP11 | Homo sapiens dual specificity phosphatase 11 (RNA/RNP complex 1-interacting) (DUSP11), mRNA [NM_003584] | 8446  |

|              |      |      |     |      |        |                                                                                               |        |
|--------------|------|------|-----|------|--------|-----------------------------------------------------------------------------------------------|--------|
| A_23_P207537 | 1.3  | 1.0  | 1.2 | -3.9 | DUSP14 | Homo sapiens dual specificity phosphatase 14 (DUSP14), mRNA [NM_007026]                       | 11072  |
| A_23_P154771 | 1.6  | 2.0  | 1.7 | 3.6  | DUSP15 | Homo sapiens dual specificity phosphatase 15 (DUSP15), transcript variant 1, mRNA [NM_080611] | 128853 |
| A_24_P73264  | 1.3  | -1.6 | 1.0 | -3.8 | DUSP16 | Homo sapiens dual specificity phosphatase 16 (DUSP16), mRNA [NM_030640]                       | 80824  |
| A_24_P189739 | -2.2 | 1.5  | 1.5 | 1.0  | DUSP16 | Homo sapiens dual specificity phosphatase 16 (DUSP16), mRNA [NM_030640]                       | 80824  |

|              |     |      |      |     |        |                                                                         |       |
|--------------|-----|------|------|-----|--------|-------------------------------------------------------------------------|-------|
| A_24_P37409  | 1.2 | 1.6  | -3.3 | 1.4 | DUSP2  | Homo sapiens dual specificity phosphatase 2 (DUSP2), mRNA [NM_004418]   | 1844  |
| A_23_P108842 | 1.4 | -4.3 | 1.3  | 1.4 | DUSP2  | Homo sapiens dual specificity phosphatase 2 (DUSP2), mRNA [NM_004418]   | 1844  |
| A_23_P256077 | 1.1 | 1.2  | 1.0  | 4.2 | DUSP21 | Homo sapiens dual specificity phosphatase 21 (DUSP21), mRNA [NM_022076] | 63904 |
| A_23_P7896   | 1.6 | 1.6  | 2.5  | 1.3 | DUSP22 | Homo sapiens dual specificity phosphatase 22 (DUSP22), mRNA [NM_020185] | 56940 |

|              |      |      |      |      |        |                                                                                    |        |
|--------------|------|------|------|------|--------|------------------------------------------------------------------------------------|--------|
| A_23_P103232 | -6.8 | 1.0  | -1.0 | 1.1  | DUSP23 | Homo sapiens dual specificity phosphatase 23 (DUSP23), mRNA [NM_017823]            | 54935  |
| A_23_P146134 | -1.7 | -1.9 | -3.0 | -1.9 | DUSP26 | Homo sapiens dual specificity phosphatase 26 (putative) (DUSP26), mRNA [NM_024025] | 78986  |
| A_23_P129956 | 1.0  | -2.3 | -1.0 | 1.1  | DUSP3  | Homo sapiens dual specificity phosphatase 3 (DUSP3), mRNA [NM_004090]              | 1845   |
| A_24_P173790 | 1.1  | 2.0  | 1.3  | 1.5  | DUSP5P | Homo sapiens cDNA FLJ31401 fis, clone NT2NE200038. [AK055963]                      | 574029 |

|              |      |      |      |      |        |                                                                                             |        |
|--------------|------|------|------|------|--------|---------------------------------------------------------------------------------------------|--------|
| A_32_P157846 | -8.4 | -1.6 | -1.8 | -2.2 | DUSP5P | Homo sapiens dual specificity phosphatase 5 pseudogene (DUSP5P), non-coding RNA [NR_002834] | 574029 |
| A_23_P139704 | 2.3  | 2.2  | 2.0  | 1.1  | DUSP6  | Homo sapiens dual specificity phosphatase 6 (DUSP6), transcript variant 1, mRNA [NM_001946] | 1848   |
| A_24_P51855  | 1.6  | -1.0 | -2.0 | -1.8 | DUSP7  | Homo sapiens dual specificity phosphatase 7 (DUSP7), mRNA [NM_001947]                       | 1849   |
| A_23_P390528 | -3.0 | -2.7 | -1.6 | -1.6 | DUSP8  | Homo sapiens dual specificity phosphatase 8 (DUSP8), mRNA [NM_004420]                       | 1850   |

|              |      |      |      |      |        |                                                                               |        |
|--------------|------|------|------|------|--------|-------------------------------------------------------------------------------|--------|
| A_23_P104413 | -2.0 | -2.0 | -2.1 | -1.3 | DUX4   | Homo sapiens double homeobox 4 (DUX4), mRNA [NM_033178]                       | 22947  |
| A_23_P333129 | -2.4 | -1.3 | -4.8 | 1.9  | DUX4L4 | Homo sapiens double homeobox 4 like 4 (DUX4L4), mRNA [NM_001177376]           | 441056 |
| A_23_P347432 | -2.6 | -1.0 | -1.8 | -4.5 | DVL1   | Homo sapiens dishevelled, dsh homolog 1 (Drosophila) (DVL1), mRNA [NM_004421] | 1855   |
| A_23_P201342 | -2.0 | 1.3  | 1.5  | -1.2 | DVL1   | Homo sapiens dishevelled, dsh homolog 1 (Drosophila) (DVL1), mRNA [NM_004421] | 1855   |



|              |      |      |      |      |         |                                                                                                            |        |
|--------------|------|------|------|------|---------|------------------------------------------------------------------------------------------------------------|--------|
| A_24_P283000 | -2.6 | -1.8 | -2.1 | -3.3 | DVL3    | Homo sapiens dishevelled, dsh homolog 3 (Drosophila) (DVL3), mRNA [NM_004423]                              | 1857   |
| A_23_P218884 | 1.3  | -1.2 | -3.0 | -1.1 | DVL3    | Homo sapiens dishevelled, dsh homolog 3 (Drosophila) (DVL3), mRNA [NM_004423]                              | 1857   |
| A_23_P360990 | -4.3 | 1.4  | 1.3  | 1.2  | DYDC1   | Homo sapiens DPY30 domain containing 1 (DYDC1), mRNA [NM_138812]                                           | 143241 |
| A_24_P221414 | -1.0 | -1.1 | -1.1 | -4.0 | DYNC111 | Homo sapiens dynein, cytoplasmic 1, intermediate chain 1 (DYNC111), transcript variant 1, mRNA [NM_004411] | 1780   |

|              |      |       |      |      |         |                                                                                                        |       |
|--------------|------|-------|------|------|---------|--------------------------------------------------------------------------------------------------------|-------|
| A_32_P30926  | -2.4 | -10.8 | -4.2 | -3.0 | DYNC1I2 | Homo sapiens dynein, cytoplasmic 1, intermediate chain 2 (DYNC1I2), mRNA [NM_001378]                   | 1781  |
| A_23_P147397 | -1.2 | 2.3   | -1.2 | -1.3 | DYNC2H1 | Homo sapiens dynein, cytoplasmic 2, heavy chain 1 (DYNC2H1), transcript variant 2, mRNA [NM_001080463] | 79659 |
| A_24_P83846  | 4.6  | 16.2  | 15.6 | 31.2 | DYNC2H1 | Homo sapiens dynein, cytoplasmic 2, heavy chain 1 (DYNC2H1), transcript variant 1, mRNA [NM_001377]    | 79659 |

|              |      |     |      |     |         |                                                                                                                                 |       |
|--------------|------|-----|------|-----|---------|---------------------------------------------------------------------------------------------------------------------------------|-------|
| A_24_P143440 | 2.1  | 2.0 | 1.8  | 1.8 | DYNLRB1 | Homo sapiens dynein, light chain, roadblock-type 1 (DYNLRB1), mRNA [NM_014183]                                                  | 83658 |
| A_24_P100368 | -4.2 | 1.0 | -1.1 | 1.1 | DYNLT3  | Homo sapiens dynein, light chain, Tctex-type 3 (DYNLT3), mRNA [NM_006520]                                                       | 6990  |
| A_24_P62169  | 1.2  | 1.6 | 1.3  | 2.0 | DYRK1A  | Homo sapiens dual-specificity tyrosine-(Y)-phosphorylation regulated kinase 1A (DYRK1A), transcript variant 2, mRNA [NM_130436] | 1859  |

|              |      |      |      |      |        |                                                                                                                                 |      |
|--------------|------|------|------|------|--------|---------------------------------------------------------------------------------------------------------------------------------|------|
| A_32_P852607 | 1.5  | 1.2  | -1.4 | -2.1 | DYRK1A | dual-specificity tyrosine-(Y)-phosphorylation regulated kinase 1A [Source:HGNC Symbol;Acc:3091] [ENST00000462274]               | 1859 |
| A_24_P322753 | -2.6 | -2.6 | -4.5 | -2.4 | DYRK1A | Homo sapiens dual-specificity tyrosine-(Y)-phosphorylation regulated kinase 1A (DYRK1A), transcript variant 5, mRNA [NM_130438] | 1859 |
| A_23_P211126 | 1.1  | 1.1  | -2.1 | 1.1  | DYRK1A | Homo sapiens dual-specificity tyrosine-(Y)-phosphorylation regulated kinase 1A (DYRK1A), transcript variant 2, mRNA [NM_130436] | 1859 |

|             |      |      |      |      |        |                                                                                                                                 |      |
|-------------|------|------|------|------|--------|---------------------------------------------------------------------------------------------------------------------------------|------|
| A_23_P90296 | -1.1 | 2.4  | -2.0 | -1.0 | DYRK1B | Homo sapiens dual-specificity tyrosine-(Y)-phosphorylation regulated kinase 1B (DYRK1B), transcript variant a, mRNA [NM_004714] | 9149 |
| A_23_P87902 | 1.1  | -2.3 | 1.1  | -1.1 | DYRK4  | Homo sapiens dual-specificity tyrosine-(Y)-phosphorylation regulated kinase 4 (DYRK4), mRNA [NM_003845]                         | 8798 |
| A_23_P39925 | -4.6 | -1.1 | -1.8 | -1.3 | DYSF   | Homo sapiens dysferlin, limb girdle muscular dystrophy 2B (autosomal recessive) (DYSF), transcript variant 8, mRNA [NM_003494]  | 8291 |

|              |      |      |       |      |        |                                                                                                                                |       |
|--------------|------|------|-------|------|--------|--------------------------------------------------------------------------------------------------------------------------------|-------|
| A_23_P39931  | -1.2 | 4.1  | 5.2   | 4.5  | DYSF   | Homo sapiens dysferlin, limb girdle muscular dystrophy 2B (autosomal recessive) (DYSF), transcript variant 8, mRNA [NM_003494] | 8291  |
| A_24_P323425 | 1.7  | 1.8  | -10.1 | -1.3 | DZANK1 | Homo sapiens double zinc ribbon and ankyrin repeat domains 1 (DZANK1), mRNA [NM_001099407]                                     | 55184 |
| A_24_P408297 | 1.9  | -1.0 | -4.2  | 1.1  | DZANK1 | Homo sapiens double zinc ribbon and ankyrin repeat domains 1 (DZANK1), mRNA [NM_001099407]                                     | 55184 |

|              |      |       |      |      |       |                                                                                        |       |
|--------------|------|-------|------|------|-------|----------------------------------------------------------------------------------------|-------|
| A_23_P14157  | 1.1  | 1.1   | 1.1  | -2.3 | DZIP1 | Homo sapiens DAZ interacting protein 1 (DZIP1), transcript variant 2, mRNA [NM_198968] | 22873 |
| A_23_P144165 | -1.0 | -2.2  | -1.5 | 1.4  | DZIP3 | Homo sapiens DAZ interacting protein 3, zinc finger (DZIP3), mRNA [NM_014648]          | 9666  |
| A_24_P102504 | -1.3 | -3.6  | -6.8 | -3.0 | DZIP3 | Homo sapiens DAZ interacting protein 3, zinc finger (DZIP3), mRNA [NM_014648]          | 9666  |
| A_23_P408955 | 1.1  | -28.2 | 1.0  | -1.0 | E2F2  | Homo sapiens E2F transcription factor 2 (E2F2), mRNA [NM_004091]                       | 1870  |

|              |      |      |      |      |      |                                                                                     |      |
|--------------|------|------|------|------|------|-------------------------------------------------------------------------------------|------|
| A_23_P125990 | 2.3  | 3.2  | 2.5  | 1.3  | E2F2 | Homo sapiens E2F transcription factor 2 (E2F2), mRNA [NM_004091]                    | 1870 |
| A_23_P152218 | 2.0  | 2.3  | -2.9 | -1.1 | E2F4 | Homo sapiens E2F transcription factor 4, p107/p130-binding (E2F4), mRNA [NM_001950] | 1874 |
| A_24_P318457 | -1.0 | -1.0 | -1.1 | -2.1 | E2F4 | Homo sapiens E2F transcription factor 4, p107/p130-binding (E2F4), mRNA [NM_001950] | 1874 |
| A_23_P15045  | 2.4  | -3.3 | -1.5 | 1.5  | E4F1 | Homo sapiens E4F transcription factor 1 (E4F1), mRNA [NM_004424]                    | 1877 |



|              |      |      |      |      |      |                                                                |        |
|--------------|------|------|------|------|------|----------------------------------------------------------------|--------|
| A_23_P252201 | 1.9  | 1.9  | 2.0  | 1.1  | EAF2 | Homo sapiens ELL associated factor 2 (EAF2), mRNA [NM_018456]  | 55840  |
| A_24_P156501 | 1.0  | -3.9 | 1.0  | -1.0 | EBF1 | Homo sapiens early B-cell factor 1 (EBF1), mRNA [NM_024007]    | 1879   |
| A_24_P43826  | -2.8 | 1.0  | -1.5 | 1.9  | EBF2 | Homo sapiens early B-cell factor 2 (EBF2), mRNA [NM_022659]    | 64641  |
| A_23_P381645 | -7.1 | -1.7 | 1.0  | 1.8  | EBF3 | Homo sapiens early B-cell factor 3 (EBF3), mRNA [NM_001005463] | 253738 |
| A_32_P160127 | 2.2  | 2.2  | -1.2 | 2.3  | EBF3 | Homo sapiens early B-cell factor 3 (EBF3), mRNA [NM_001005463] | 253738 |

|              |     |       |      |     |      |                                                                                               |       |
|--------------|-----|-------|------|-----|------|-----------------------------------------------------------------------------------------------|-------|
| A_23_P109122 | 1.5 | 2.0   | 1.2  | 1.7 | EBF4 | Homo sapiens early B-cell factor 4 (EBF4), mRNA [NM_001110514]                                | 57593 |
| A_23_P119478 | 2.9 | 2.0   | 1.1  | 1.0 | EBI3 | Homo sapiens Epstein-Barr virus induced 3 (EBI3), mRNA [NM_005755]                            | 10148 |
| A_23_P115762 | 1.3 | -2.4  | -3.0 | 1.8 | ECD  | Homo sapiens ecdysonelless homolog (Drosophila) (ECD), transcript variant 1, mRNA [NM_007265] | 11319 |
| A_24_P154080 | 1.0 | -12.2 | 1.0  | 1.0 | ECE1 | Homo sapiens endothelin converting enzyme 1 (ECE1), transcript variant 1, mRNA [NM_001397]    | 1889  |

|              |      |       |      |      |      |                                                                                            |      |
|--------------|------|-------|------|------|------|--------------------------------------------------------------------------------------------|------|
| A_23_P92261  | -1.9 | -2.1  | -2.1 | -2.2 | ECE2 | Homo sapiens endothelin converting enzyme 2 (ECE2), transcript variant 3, mRNA [NM_032331] | 9718 |
| A_23_P257786 | 10.0 | 5.3   | 13.3 | 12.6 | ECE2 | Homo sapiens endothelin converting enzyme 2 (ECE2), transcript variant 1, mRNA [NM_014693] | 9718 |
| A_23_P377299 | 1.1  | -34.7 | 1.0  | 1.3  | ECE2 | Homo sapiens endothelin converting enzyme 2 (ECE2), transcript variant 1, mRNA [NM_014693] | 9718 |
| A_23_P153853 | 2.6  | 4.5   | 4.1  | 2.6  | ECH1 | Homo sapiens enoyl CoA hydratase 1, peroxisomal (ECH1), mRNA [NM_001398]                   | 1891 |

|              |       |      |      |      |        |                                                                                                                                      |       |
|--------------|-------|------|------|------|--------|--------------------------------------------------------------------------------------------------------------------------------------|-------|
| A_23_P215051 | -12.0 | -1.0 | -1.0 | -1.0 | ECHDC1 | Homo sapiens enoyl CoA hydratase domain containing 1 (ECHDC1), transcript variant 2, mRNA [NM_018479]                                | 55862 |
| A_24_P225477 | -1.0  | -2.3 | -1.2 | -1.7 | ECHDC2 | Homo sapiens enoyl CoA hydratase domain containing 2 (ECHDC2), transcript variant 2, mRNA [NM_018281]                                | 55268 |
| A_23_P163647 | -4.1  | -1.4 | -1.2 | -2.6 | ECI1   | Homo sapiens enoyl-CoA delta isomerase 1 (ECI1), nuclear gene encoding mitochondrial protein, transcript variant 1, mRNA [NM_001919] | 1632  |

|              |      |      |      |      |       |                                                                                                                     |       |
|--------------|------|------|------|------|-------|---------------------------------------------------------------------------------------------------------------------|-------|
| A_23_P216434 | -2.4 | -2.6 | -2.7 | -2.6 | ECM2  | extracellular matrix protein 2, female organ and adipocyte specific [Source:HGNC Symbol;Acc:3154] [ENST00000375540] | 1842  |
| A_23_P44684  | -7.1 | 1.2  | 1.1  | -1.1 | ECT2  | Homo sapiens epithelial cell transforming sequence 2 oncogene (ECT2), mRNA [NM_018098]                              | 1894  |
| A_24_P100419 | -1.4 | -2.8 | -1.0 | -1.0 | EDA   | Homo sapiens ectodysplasin A (EDA), transcript variant 5, mRNA [NM_001005612]                                       | 1896  |
| A_23_P171132 | 3.2  | 3.0  | 2.9  | 2.3  | EDA2R | Homo sapiens ectodysplasin A2 receptor (EDA2R), transcript variant 2, mRNA [NM_021783]                              | 60401 |

|              |      |      |      |      |         |                                                                                                                  |        |
|--------------|------|------|------|------|---------|------------------------------------------------------------------------------------------------------------------|--------|
| A_23_P503233 | -1.0 | -3.6 | -1.1 | -1.4 | EDARADD | Homo sapiens EDAR-associated death domain (EDARADD), transcript variant B, mRNA [NM_080738]                      | 128178 |
| A_32_P223644 | 1.2  | -2.2 | 1.3  | 1.3  | EDC3    | Homo sapiens enhancer of mRNA decapping 3 homolog (S. cerevisiae) (EDC3), transcript variant 3, mRNA [NM_025083] | 80153  |
| A_24_P399009 | 1.1  | -2.2 | -1.0 | -1.0 | EDC4    | Homo sapiens enhancer of mRNA decapping 4 (EDC4), mRNA [NM_014329]                                               | 23644  |
| A_23_P14414  | 6.2  | 6.2  | 1.2  | 6.1  | EDDM3B  | Homo sapiens epididymal protein 3B (EDDM3B), mRNA [NM_022360]                                                    | 64184  |

|              |      |      |      |      |       |                                                                                                                |       |
|--------------|------|------|------|------|-------|----------------------------------------------------------------------------------------------------------------|-------|
| A_24_P285768 | 8.6  | 1.8  | 9.7  | 7.1  | EDEM1 | Homo sapiens ER degradation enhancer, mannosidase alpha-like 1 (EDEM1), mRNA [NM_014674]                       | 9695  |
| A_23_P40975  | -3.2 | -1.1 | -1.2 | -1.0 | EDEM1 | Homo sapiens ER degradation enhancer, mannosidase alpha-like 1 (EDEM1), mRNA [NM_014674]                       | 9695  |
| A_23_P166193 | 2.8  | 2.7  | 1.9  | 2.2  | EDEM2 | Homo sapiens ER degradation enhancer, mannosidase alpha-like 2 (EDEM2), transcript variant 1, mRNA [NM_018217] | 55741 |

|              |      |      |       |      |        |                                                                                            |      |
|--------------|------|------|-------|------|--------|--------------------------------------------------------------------------------------------|------|
| A_23_P7337   | -2.6 | -2.7 | -2.8  | -2.7 | EDNRA  | Homo sapiens endothelin receptor type A (EDNRA), transcript variant 1, mRNA [NM_001957]    | 1909 |
| A_24_P330263 | 2.2  | -1.4 | -1.1  | 1.2  | EDNRB  | Homo sapiens endothelin receptor type B (EDNRB), transcript variant 2, mRNA [NM_003991]    | 1910 |
| A_23_P53217  | -2.1 | 2.5  | 1.2   | 1.7  | EED    | Homo sapiens embryonic ectoderm development (EED), transcript variant 2, mRNA [NM_152991]  | 8726 |
| A_32_P44316  | 1.3  | -1.0 | -28.5 | 1.2  | EEF1A1 | Homo sapiens eukaryotic translation elongation factor 1 alpha 1 (EEF1A1), mRNA [NM_001402] | 1915 |



|              |      |      |      |      |        |                                                                                                                                                     |      |
|--------------|------|------|------|------|--------|-----------------------------------------------------------------------------------------------------------------------------------------------------|------|
| A_32_P47701  | -1.8 | -2.7 | -2.5 | -2.3 | EEF1A1 | Homo sapiens eukaryotic translation elongation factor 1 alpha 1 (EEF1A1), mRNA [NM_001402]                                                          | 1915 |
| A_23_P256033 | -3.0 | 1.7  | -1.1 | 1.1  | EEF1A2 | Homo sapiens eukaryotic translation elongation factor 1 alpha 2 (EEF1A2), mRNA [NM_001958]                                                          | 1917 |
| A_24_P734297 | -1.4 | 2.0  | 1.7  | 1.3  | EEF1D  | Homo sapiens eukaryotic translation elongation factor 1 delta (guanine nucleotide exchange protein) (EEF1D), transcript variant 1, mRNA [NM_032378] | 1936 |

|              |      |      |      |      |        |                                                                                                                    |       |
|--------------|------|------|------|------|--------|--------------------------------------------------------------------------------------------------------------------|-------|
| A_23_P156842 | 2.3  | 1.1  | -1.3 | 1.9  | EEF1E1 | Homo sapiens eukaryotic translation elongation factor 1 epsilon 1 (EEF1E1), transcript variant 1, mRNA [NM_004280] | 9521  |
| A_23_P333498 | -1.1 | -2.2 | -1.2 | -1.2 | EEPD1  | Homo sapiens endonuclease/exonuclease/phosphatase family domain containing 1 (EEPD1), mRNA [NM_030636]             | 80820 |
| A_24_P415090 | 1.0  | -4.0 | -1.7 | -1.0 | EFCAB1 | Homo sapiens EF-hand calcium binding domain 1 (EFCAB1), transcript variant 1, mRNA [NM_024593]                     | 79645 |

|              |      |      |      |      |         |                                                                                                |        |
|--------------|------|------|------|------|---------|------------------------------------------------------------------------------------------------|--------|
| A_23_P149476 | 2.4  | 1.3  | 1.4  | 1.1  | EFCAB2  | Homo sapiens EF-hand calcium binding domain 2 (EFCAB2), transcript variant 1, mRNA [NM_032328] | 84288  |
| A_32_P515971 | -1.2 | -3.1 | -1.4 | -1.1 | EFCAB3  | Homo sapiens EF-hand calcium binding domain 3 (EFCAB3), transcript variant 2, mRNA [NM_173503] | 146779 |
| A_32_P462013 | -7.1 | -1.9 | -1.1 | -2.8 | EFCAB4B | EF-hand calcium binding domain 4B [Source:HGNC Symbol;Acc:28657] [ENST00000333750]             | 84766  |
| A_23_P68978  | -1.0 | -3.3 | -1.1 | -1.1 | EFCAB6  | Homo sapiens EF-hand calcium binding domain 6 (EFCAB6), transcript variant 1, mRNA [NM_022785] | 64800  |

|              |      |      |      |      |        |                                                                                                                          |        |
|--------------|------|------|------|------|--------|--------------------------------------------------------------------------------------------------------------------------|--------|
| A_24_P118608 | 1.4  | 2.0  | 1.4  | -2.4 | EFCAB7 | Homo sapiens EF-hand calcium binding domain 7 (EFCAB7), mRNA [NM_032437]                                                 | 84455  |
| A_23_P24414  | 1.8  | -2.5 | 1.2  | 1.2  | EFEMP2 | Homo sapiens EGF containing fibulin-like extracellular matrix protein 2 (EFEMP2), transcript variant 1, mRNA [NM_016938] | 30008  |
| A_23_P76598  | -7.4 | 1.2  | -3.1 | 1.1  | EFHA1  | Homo sapiens EF-hand domain family, member A1 (EFHA1), mRNA [NM_152726]                                                  | 221154 |
| A_23_P214291 | -1.2 | 1.5  | 2.0  | -2.4 | EFHC1  | Homo sapiens EF-hand domain (C-terminal) containing 1 (EFHC1), transcript variant A, mRNA [NM_018100]                    | 114327 |

|              |      |      |      |      |       |                                                                                               |       |
|--------------|------|------|------|------|-------|-----------------------------------------------------------------------------------------------|-------|
| A_23_P154338 | -1.3 | -3.5 | 1.0  | -1.8 | EFHD1 | Homo sapiens EF-hand domain family, member D1 (EFHD1), transcript variant 1, mRNA [NM_025202] | 80303 |
| A_24_P251053 | -4.9 | -5.3 | -2.6 | -3.4 | EFHD2 | Homo sapiens EF-hand domain family, member D2 (EFHD2), mRNA [NM_024329]                       | 79180 |
| A_23_P113005 | -2.1 | -1.6 | -4.5 | -1.6 | EFNA1 | Homo sapiens ephrin-A1 (EFNA1), transcript variant 1, mRNA [NM_004428]                        | 1942  |
| A_23_P119535 | -1.5 | 1.5  | 1.0  | -2.4 | EFNA2 | Homo sapiens ephrin-A2 (EFNA2), mRNA [NM_001405]                                              | 1943  |
| A_24_P355944 | -2.9 | 1.3  | 1.0  | -1.2 | EFNB2 | Homo sapiens ephrin-B2 (EFNB2), mRNA [NM_004093]                                              | 1948  |

|              |       |      |      |      |        |                                                                                                                    |       |
|--------------|-------|------|------|------|--------|--------------------------------------------------------------------------------------------------------------------|-------|
| A_24_P940006 | -1.5  | -1.5 | -1.5 | -5.7 | EFNB3  | Homo sapiens ephrin-B3 (EFNB3), mRNA [NM_001406]                                                                   | 1949  |
| A_23_P71513  | -25.4 | 1.0  | -1.1 | 1.4  | EFR3A  | Homo sapiens EFR3 homolog A (S. cerevisiae) (EFR3A), mRNA [NM_015137]                                              | 23167 |
| A_23_P369654 | -3.9  | -1.2 | -8.2 | 2.7  | EFR3B  | Homo sapiens mRNA for KIAA0953 protein, partial cds. [AB023170]                                                    | 22979 |
| A_24_P754817 | -2.3  | -1.2 | -1.2 | -1.3 | EFTUD1 | Homo sapiens elongation factor Tu GTP binding domain containing 1 (EFTUD1), transcript variant 1, mRNA [NM_024580] | 79631 |

|              |      |      |      |      |         |                                                                                                     |       |
|--------------|------|------|------|------|---------|-----------------------------------------------------------------------------------------------------|-------|
| A_23_P155979 | 1.7  | 1.7  | -2.1 | 1.5  | EGF     | Homo sapiens epidermal growth factor (EGF), transcript variant 1, mRNA [NM_001963]                  | 1950  |
| A_24_P68183  | 1.0  | -1.7 | -3.4 | -1.0 | EGFEM1P | Homo sapiens EGF-like and EMI domain containing 1, pseudogene (EGFEM1P), non-coding RNA [NR_021485] | 93556 |
| A_23_P168105 | -1.7 | 2.1  | -1.0 | 1.0  | EGFL8   | Homo sapiens EGF-like-domain, multiple 8 (EGFL8), transcript variant 1, mRNA [NM_030652]            | 80864 |
| A_23_P424582 | 3.5  | 1.8  | -1.1 | 1.5  | EGFL8   | Homo sapiens EGF-like-domain, multiple 8 (EGFL8), transcript variant 1, mRNA [NM_030652]            | 80864 |

|              |      |      |      |      |       |                                                                                              |        |
|--------------|------|------|------|------|-------|----------------------------------------------------------------------------------------------|--------|
| A_24_P410363 | 1.3  | 1.5  | -2.4 | 1.0  | EGLN1 | Homo sapiens egl nine homolog 1 (C. elegans) (EGLN1), mRNA [NM_022051]                       | 54583  |
| A_23_P34710  | 35.7 | 57.4 | 17.1 | 23.9 | EGLN1 | Homo sapiens egl nine homolog 1 (C. elegans) (EGLN1), mRNA [NM_022051]                       | 54583  |
| A_24_P322395 | 2.4  | 1.9  | -1.4 | 1.2  | EGLN2 | Homo sapiens egl nine homolog 2 (C. elegans) (EGLN2), transcript variant 3, mRNA [NM_080732] | 112398 |
| A_23_P360379 | 2.3  | 2.3  | 2.0  | 1.4  | EGLN3 | Homo sapiens egl nine homolog 3 (C. elegans) (EGLN3), mRNA [NM_022073]                       | 112399 |



|              |      |      |      |      |       |                                                                                          |       |
|--------------|------|------|------|------|-------|------------------------------------------------------------------------------------------|-------|
| A_32_P53908  | -2.1 | -1.1 | 1.4  | -2.7 | EHBP1 | Homo sapiens EH domain binding protein 1 (EHBP1), transcript variant 1, mRNA [NM_015252] | 23301 |
| A_24_P194886 | -1.5 | 2.7  | 1.2  | 2.7  | EHBP1 | Homo sapiens EH domain binding protein 1 (EHBP1), transcript variant 1, mRNA [NM_015252] | 23301 |
| A_23_P119390 | -2.1 | 1.8  | -1.8 | 1.8  | EHD2  | Homo sapiens EH domain containing 2 (EHD2), mRNA [NM_014601]                             | 30846 |
| A_24_P64442  | -2.1 | -1.0 | -1.0 | -1.0 | EHF   | Homo sapiens ets homologous factor (EHF), transcript variant 1, mRNA [NM_001206616]      | 26298 |

|              |      |      |      |      |       |                                                                                                                          |       |
|--------------|------|------|------|------|-------|--------------------------------------------------------------------------------------------------------------------------|-------|
| A_24_P801451 | -1.1 | -1.3 | -4.7 | -4.6 | EHMT2 | Homo sapiens euchromatic histone-lysine N-methyltransferase 2 (EHMT2), transcript variant NG36/G9a, mRNA [NM_006709]     | 10919 |
| A_24_P303390 | -3.3 | -1.4 | 1.0  | 1.1  | EHMT2 | Homo sapiens euchromatic histone-lysine N-methyltransferase 2 (EHMT2), transcript variant NG36/G9a-SPI, mRNA [NM_025256] | 10919 |
| A_24_P4661   | -2.6 | -3.8 | -3.5 | -1.5 | EI24  | Homo sapiens etoposide induced 2.4 mRNA (EI24), transcript variant 1, mRNA [NM_004879]                                   | 9538  |

|              |      |     |      |      |        |                                                                                                                             |        |
|--------------|------|-----|------|------|--------|-----------------------------------------------------------------------------------------------------------------------------|--------|
| A_23_P368259 | 1.6  | 1.6 | 1.5  | -3.8 | EID2B  | Homo sapiens EP300 interacting inhibitor of differentiation 2B (EID2B), mRNA [NM_152361]                                    | 126272 |
| A_23_P127467 | 1.7  | 4.1 | 1.8  | 2.6  | EIF1AD | Homo sapiens eukaryotic translation initiation factor 1A domain containing (EIF1AD), transcript variant 3, mRNA [NM_032325] | 84285  |
| A_23_P148629 | -1.4 | 1.8 | -6.4 | 1.5  | EIF1AY | Homo sapiens eukaryotic translation initiation factor 1A, Y-linked (EIF1AY), mRNA [NM_004681]                               | 9086   |

|              |     |       |      |      |        |                                                                                               |       |
|--------------|-----|-------|------|------|--------|-----------------------------------------------------------------------------------------------|-------|
| A_24_P237511 | 1.0 | -12.7 | -1.0 | -1.0 | EIF1AY | Homo sapiens eukaryotic translation initiation factor 1A, Y-linked (EIF1AY), mRNA [NM_004681] | 9086  |
| A_23_P6891   | 1.0 | -1.0  | -1.1 | -2.8 | EIF1B  | Homo sapiens eukaryotic translation initiation factor 1B (EIF1B), mRNA [NM_005875]            | 10289 |
| A_32_P197524 | 1.1 | 1.1   | -2.1 | -1.0 | EIF2A  | Homo sapiens eukaryotic translation initiation factor 2A, 65kDa (EIF2A), mRNA [NM_032025]     | 83939 |

|              |      |      |     |      |         |                                                                                                                          |        |
|--------------|------|------|-----|------|---------|--------------------------------------------------------------------------------------------------------------------------|--------|
| A_23_P142750 | 1.0  | -2.5 | 1.0 | 1.0  | EIF2AK2 | Homo sapiens eukaryotic translation initiation factor 2-alpha kinase 2 (EIF2AK2), transcript variant 1, mRNA [NM_002759] | 5610   |
| A_23_P54540  | 1.8  | 2.0  | 1.6 | -1.3 | EIF2AK4 | Homo sapiens eukaryotic translation initiation factor 2 alpha kinase 4 (EIF2AK4), mRNA [NM_001013703]                    | 440275 |
| A_23_P105313 | -5.5 | -1.3 | 1.4 | -1.4 | EIF2B1  | Homo sapiens eukaryotic translation initiation factor 2B, subunit 1 alpha, 26kDa (EIF2B1), mRNA [NM_001414]              | 1967   |

|              |      |      |      |      |        |                                                                                                                                      |       |
|--------------|------|------|------|------|--------|--------------------------------------------------------------------------------------------------------------------------------------|-------|
| A_23_P115046 | -1.1 | -2.0 | -2.0 | -2.1 | EIF2B3 | Homo sapiens eukaryotic translation initiation factor 2B, subunit 3 gamma, 58kDa (EIF2B3), transcript variant 1, mRNA [NM_020365]    | 8891  |
| A_23_P154058 | 2.6  | -1.0 | -1.1 | 2.1  | EIF2B4 | Homo sapiens eukaryotic translation initiation factor 2B, subunit 4 delta, 67kDa (EIF2B4), transcript variant 2, mRNA [NM_001034116] | 8890  |
| A_24_P96749  | 5.0  | 5.2  | 4.6  | 4.2  | EIF2C1 | Homo sapiens eukaryotic translation initiation factor 2C, 1 (EIF2C1), mRNA [NM_012199]                                               | 26523 |

|              |      |      |      |      |        |                                                                                                            |        |
|--------------|------|------|------|------|--------|------------------------------------------------------------------------------------------------------------|--------|
| A_24_P941670 | -5.0 | 1.0  | -1.0 | 1.0  | EIF2C4 | Homo sapiens eukaryotic translation initiation factor 2C, 4 (EIF2C4), mRNA [NM_017629]                     | 192670 |
| A_24_P138556 | -1.2 | -3.9 | -3.4 | -4.4 | EIF2S1 | Homo sapiens eukaryotic translation initiation factor 2, subunit 1 alpha, 35kDa (EIF2S1), mRNA [NM_004094] | 1965   |
| A_23_P137031 | 3.4  | 3.2  | 2.0  | 1.1  | EIF2S3 | Homo sapiens eukaryotic translation initiation factor 2, subunit 3 gamma, 52kDa (EIF2S3), mRNA [NM_001415] | 1968   |

|             |      |      |      |      |       |                                                                                                                       |      |
|-------------|------|------|------|------|-------|-----------------------------------------------------------------------------------------------------------------------|------|
| A_23_P77572 | -2.0 | 2.4  | 2.6  | -1.9 | EIF3C | Homo sapiens eukaryotic translation initiation factor 3, subunit C (EIF3C), transcript variant 2, mRNA [NM_001037808] | 8663 |
| A_23_P77568 | -2.0 | -2.0 | -3.3 | -2.0 | EIF3C | Homo sapiens eukaryotic translation initiation factor 3, subunit C (EIF3C), transcript variant 2, mRNA [NM_001037808] | 8663 |
| A_23_P91699 | -3.3 | -1.0 | -1.0 | 1.0  | EIF3D | Homo sapiens eukaryotic translation initiation factor 3, subunit D (EIF3D), mRNA [NM_003753]                          | 8664 |



|              |      |     |     |     |       |                                                                                                                    |       |
|--------------|------|-----|-----|-----|-------|--------------------------------------------------------------------------------------------------------------------|-------|
| A_32_P229760 | -5.1 | 1.7 | 1.6 | 1.0 | EIF3E | Homo sapiens eukaryotic translation initiation factor 3, subunit E (EIF3E), mRNA [NM_001568]                       | 3646  |
| A_23_P57521  | 3.1  | 1.1 | 1.8 | 1.9 | EIF3L | Homo sapiens eukaryotic translation initiation factor 3, subunit L (EIF3L), transcript variant 1, mRNA [NM_016091] | 51386 |
| A_32_P68076  | 2.9  | 8.0 | 3.5 | 2.5 | EIF3M | eukaryotic translation initiation factor 3, subunit M [Source:HGNC Symbol;Acc:24460] [ENST00000531120]             | 10480 |

|              |      |      |        |      |        |                                                                                                            |      |
|--------------|------|------|--------|------|--------|------------------------------------------------------------------------------------------------------------|------|
| A_32_P135902 | -1.0 | -1.5 | -118.6 | -1.0 | EIF4A1 | Homo sapiens eukaryotic translation initiation factor 4A1 (EIF4A1), transcript variant 1, mRNA [NM_001416] | 1973 |
| A_24_P390793 | -3.0 | -1.2 | -2.6   | -5.1 | EIF4A1 | Homo sapiens eukaryotic translation initiation factor 4A1 (EIF4A1), transcript variant 1, mRNA [NM_001416] | 1973 |
| A_23_P137103 | -2.3 | -1.6 | -2.6   | -1.4 | EIF4A1 | Homo sapiens eukaryotic translation initiation factor 4A1 (EIF4A1), transcript variant 1, mRNA [NM_001416] | 1973 |

|              |      |      |      |       |        |                                                                                                                              |        |
|--------------|------|------|------|-------|--------|------------------------------------------------------------------------------------------------------------------------------|--------|
| A_32_P110751 | -4.3 | -1.9 | 1.1  | 1.3   | EIF4A2 | Homo sapiens eukaryotic translation initiation factor 4A2 (EIF4A2), mRNA [NM_001967]                                         | 1974   |
| A_23_P60286  | -1.8 | -2.1 | -1.8 | -1.0  | EIF4B  | Homo sapiens eukaryotic translation initiation factor 4B (EIF4B), mRNA [NM_001417]                                           | 1975   |
| A_23_P162679 | -3.5 | -2.9 | -2.0 | -15.6 | EIF4B  | Homo sapiens eukaryotic translation initiation factor 4B (EIF4B), mRNA [NM_001417]                                           | 1975   |
| A_32_P99648  | -1.7 | -2.2 | -1.8 | -3.8  | EIF4E3 | Homo sapiens eukaryotic translation initiation factor 4E family member 3 (EIF4E3), transcript variant 3, mRNA [NM_001134649] | 317649 |

|              |      |      |      |      |          |                                                                                                                           |        |
|--------------|------|------|------|------|----------|---------------------------------------------------------------------------------------------------------------------------|--------|
| A_24_P943113 | -1.2 | -4.0 | -1.3 | -1.2 | EIF4E3   | Homo sapiens eukaryotic translation initiation factor 4E family member 3 (EIF4E3), transcript variant 2, mRNA [NM_173359] | 317649 |
| A_23_P22224  | 3.2  | 1.2  | -1.0 | 1.1  | EIF4EBP1 | Homo sapiens eukaryotic translation initiation factor 4E binding protein 1 (EIF4EBP1), mRNA [NM_004095]                   | 1978   |
| A_23_P218892 | 2.6  | 2.5  | -1.2 | 1.3  | EIF4G1   | Homo sapiens eukaryotic translation initiation factor 4 gamma, 1 (EIF4G1), transcript variant 1, mRNA [NM_182917]         | 1981   |

|              |      |       |      |      |        |                                                                                                                   |      |
|--------------|------|-------|------|------|--------|-------------------------------------------------------------------------------------------------------------------|------|
| A_24_P383850 | 1.1  | 1.8   | -1.1 | 3.4  | EIF4G3 | Homo sapiens eukaryotic translation initiation factor 4 gamma, 3 (EIF4G3), transcript variant 3, mRNA [NM_003760] | 8672 |
| A_23_P126241 | 2.4  | 1.6   | 2.1  | -1.1 | EIF4G3 | Homo sapiens eukaryotic translation initiation factor 4 gamma, 3 (EIF4G3), transcript variant 3, mRNA [NM_003760] | 8672 |
| A_24_P149390 | -1.1 | -28.5 | -1.1 | -1.1 | EIF4H  | Homo sapiens eukaryotic translation initiation factor 4H (EIF4H), transcript variant 2, mRNA [NM_031992]          | 7458 |

|              |      |      |     |       |       |                                                                                                          |      |
|--------------|------|------|-----|-------|-------|----------------------------------------------------------------------------------------------------------|------|
| A_32_P168886 | -2.9 | 1.1  | 1.0 | -1.1  | EIF4H | Homo sapiens eukaryotic translation initiation factor 4H (EIF4H), transcript variant 1, mRNA [NM_022170] | 7458 |
| A_24_P720202 | -5.3 | -1.8 | 1.5 | -1.1  | EIF4H | Homo sapiens eukaryotic translation initiation factor 4H (EIF4H), transcript variant 1, mRNA [NM_022170] | 7458 |
| A_24_P415959 | 1.1  | -3.4 | 1.0 | -33.6 | EIF5  | Homo sapiens eukaryotic translation initiation factor 5 (EIF5), transcript variant 1, mRNA [NM_001969]   | 1983 |

|              |      |      |      |      |        |                                                                                                                    |      |
|--------------|------|------|------|------|--------|--------------------------------------------------------------------------------------------------------------------|------|
| A_24_P398810 | -1.1 | 1.1  | -3.1 | -1.2 | EIF5   | Homo sapiens eukaryotic translation initiation factor 5 (EIF5), transcript variant 1, mRNA [NM_001969]             | 1983 |
| A_23_P210939 | -2.1 | -1.4 | -1.6 | -1.8 | EIF6   | Homo sapiens eukaryotic translation initiation factor 6 (EIF6), transcript variant 2, mRNA [NM_181468]             | 3692 |
| A_23_P208477 | 2.4  | 2.4  | 2.3  | 1.6  | ELAVL1 | Homo sapiens ELAV (embryonic lethal, abnormal vision, Drosophila)-like 1 (Hu antigen R) (ELAVL1), mRNA [NM_001419] | 1994 |

|              |      |      |      |      |        |                                                                                                                                         |      |
|--------------|------|------|------|------|--------|-----------------------------------------------------------------------------------------------------------------------------------------|------|
| A_24_P188447 | -1.1 | 2.1  | 1.1  | -1.1 | ELAVL4 | Homo sapiens ELAV (embryonic lethal, abnormal vision, Drosophila)-like 4 (Huantigen D) (ELAVL4), transcript variant 1, mRNA [NM_021952] | 1996 |
| A_24_P944336 | -2.7 | 2.0  | 2.3  | 1.3  | ELAVL4 | ELAV (embryonic lethal, abnormal vision, Drosophila)-like 4 (Huantigen D) [Source:HGNC Symbol;Acc:3315] [ENST00000371827]               | 1996 |
| A_23_P2801   | -5.8 | -1.1 | -2.3 | -3.4 | ELF1   | Homo sapiens E74-like factor 1 (ets domain transcription factor) (ELF1), transcript variant 1, mRNA [NM_172373]                         | 1997 |



|              |      |      |      |      |       |                                                                                                                                      |        |
|--------------|------|------|------|------|-------|--------------------------------------------------------------------------------------------------------------------------------------|--------|
| A_23_P132948 | 1.0  | 1.0  | -7.0 | -1.0 | ELF2  | Homo sapiens E74-like factor 2 (ets domain transcription factor) (ELF2), transcript variant 1, mRNA [NM_201999]                      | 1998   |
| A_23_P104188 | -2.2 | -3.3 | -1.4 | -1.7 | ELF3  | Homo sapiens E74-like factor 3 (ets domain transcription factor, epithelial-specific) (ELF3), transcript variant 1, mRNA [NM_004433] | 1999   |
| A_24_P7873   | 3.2  | -1.7 | 1.3  | -1.0 | ELFN1 | Homo sapiens extracellular leucine-rich repeat and fibronectin type III domain containing 1 (ELFN1), mRNA [NM_001128636]             | 392617 |

|              |      |      |      |      |      |                                                                                                                |       |
|--------------|------|------|------|------|------|----------------------------------------------------------------------------------------------------------------|-------|
| A_24_P133171 | 1.0  | -1.1 | -2.3 | -3.4 | ELK3 | ELK3, ETS-domain protein (SRF accessory protein 2) [Source:HGNC Symbol;Acc:3325] [ENST00000228741]             | 2004  |
| A_23_P161098 | 1.1  | -3.5 | -1.0 | -1.0 | ELK4 | Homo sapiens ELK4, ETS-domain protein (SRF accessory protein 1) (ELK4), transcript variant a, mRNA [NM_001973] | 2005  |
| A_23_P27936  | -2.2 | 1.2  | -5.3 | -1.9 | ELL  | Homo sapiens elongation factor RNA polymerase II (ELL), mRNA [NM_006532]                                       | 8178  |
| A_23_P58506  | 5.0  | 4.5  | 5.5  | 3.3  | ELL2 | Homo sapiens elongation factor, RNA polymerase II, 2 (ELL2), mRNA [NM_012081]                                  | 22936 |

|              |      |      |      |      |        |                                                                                             |        |
|--------------|------|------|------|------|--------|---------------------------------------------------------------------------------------------|--------|
| A_24_P47988  | -4.3 | -4.7 | -3.1 | -6.3 | ELL3   | Homo sapiens elongation factor RNA polymerase II-like 3 (ELL3), mRNA [NM_025165]            | 80237  |
| A_24_P72420  | -1.0 | -2.5 | -1.6 | 1.3  | ELMO1  | Homo sapiens engulfment and cell motility 1 (ELMO1), transcript variant 1, mRNA [NM_014800] | 9844   |
| A_23_P7282   | -4.3 | -1.1 | 1.1  | -1.2 | ELMOD2 | Homo sapiens ELMO/CED-12 domain containing 2 (ELMOD2), mRNA [NM_153702]                     | 255520 |
| A_23_P305692 | 1.1  | -7.0 | -1.2 | -1.0 | ELMOD2 | Homo sapiens ELMO/CED-12 domain containing 2 (ELMOD2), mRNA [NM_153702]                     | 255520 |

|              |      |      |      |      |        |                                                                                               |       |
|--------------|------|------|------|------|--------|-----------------------------------------------------------------------------------------------|-------|
| A_24_P937435 | -3.2 | 1.0  | 1.1  | -1.2 | ELMOD3 | ELMO/CED-12 domain containing 3 [Source:HGNC Symbol;Acc:26158] [ENST00000488150]              | 84173 |
| A_23_P154256 | -1.2 | 1.2  | 2.2  | -1.5 | ELMOD3 | Homo sapiens ELMO/CED-12 domain containing 3 (ELMOD3), transcript variant 1, mRNA [NM_032213] | 84173 |
| A_23_P215454 | -3.6 | -1.2 | -1.1 | -2.8 | ELN    | Homo sapiens elastin (ELN), transcript variant 1, mRNA [NM_000501]                            | 2006  |
| A_23_P130689 | 2.3  | 2.1  | 1.9  | 5.0  | ELOF1  | Homo sapiens elongation factor 1 homolog (S. cerevisiae) (ELOF1), mRNA [NM_032377]            | 84337 |

|              |      |      |      |      |        |                                                                                           |       |
|--------------|------|------|------|------|--------|-------------------------------------------------------------------------------------------|-------|
| A_23_P149858 | 8.2  | 8.0  | 7.9  | 8.6  | ELOVL3 | Homo sapiens ELOVL fatty acid elongase 3 (ELOVL3), mRNA [NM_152310]                       | 83401 |
| A_23_P82065  | -8.2 | 1.1  | 1.1  | 1.0  | ELOVL4 | Homo sapiens ELOVL fatty acid elongase 4 (ELOVL4), mRNA [NM_022726]                       | 6785  |
| A_32_P80597  | 1.1  | 1.1  | -2.0 | -1.5 | ELOVL6 | ELOVL fatty acid elongase 6 [Source:HGNC Symbol;Acc:15829] [ENST00000394607]              | 79071 |
| A_23_P7361   | -1.9 | -2.1 | -2.6 | -3.7 | ELOVL6 | Homo sapiens ELOVL fatty acid elongase 6 (ELOVL6), transcript variant 1, mRNA [NM_024090] | 79071 |

|              |      |      |       |      |        |                                                                                                          |        |
|--------------|------|------|-------|------|--------|----------------------------------------------------------------------------------------------------------|--------|
| A_23_P359277 | -7.8 | -1.0 | 1.1   | -1.0 | ELOVL7 | Homo sapiens ELOVL fatty acid elongase 7 (ELOVL7), transcript variant 1, mRNA [NM_024930]                | 79993  |
| A_23_P78444  | 1.2  | 2.2  | -10.3 | 1.3  | ELP2   | Homo sapiens elongation protein 2 homolog (S. cerevisiae) (ELP2), transcript variant 2, mRNA [NM_018255] | 55250  |
| A_24_P4110   | 3.5  | 3.5  | 3.5   | 1.5  | ELP3   | Homo sapiens elongation protein 3 homolog (S. cerevisiae) (ELP3), mRNA [NM_018091]                       | 55140  |
| A_32_P206541 | -2.2 | -1.1 | -1.5  | -2.0 | EMB    | Homo sapiens embigin (EMB), mRNA [NM_198449]                                                             | 133418 |

|              |      |     |      |      |         |                                                                                      |        |
|--------------|------|-----|------|------|---------|--------------------------------------------------------------------------------------|--------|
| A_24_P253215 | 1.1  | 4.5 | 4.7  | 1.1  | EMG1    | Homo sapiens EMG1 nucleolar protein homolog (S. cerevisiae) (EMG1), mRNA [NM_006331] | 10436  |
| A_24_P96449  | -1.1 | 2.0 | 1.5  | 2.6  | EMID1   | Homo sapiens EMI domain containing 1 (EMID1), mRNA [NM_133455]                       | 129080 |
| A_23_P134627 | -1.4 | 1.3 | -5.4 | -2.8 | EMID2   | Homo sapiens EMI domain containing 2 (EMID2), mRNA [NM_133457]                       | 136227 |
| A_23_P165848 | -1.3 | 1.5 | -2.6 | 1.3  | EMILIN1 | Homo sapiens elastin microfibril interfacier 1 (EMILIN1), mRNA [NM_007046]           | 11117  |

|              |      |      |      |      |         |                                                                                                   |        |
|--------------|------|------|------|------|---------|---------------------------------------------------------------------------------------------------|--------|
| A_23_P27315  | 14.4 | 14.1 | 13.6 | 14.1 | EMILIN2 | Homo sapiens elastin microfibril interfacier 2 (EMILIN2), mRNA [NM_032048]                        | 84034  |
| A_32_P219845 | -3.6 | 1.1  | -2.2 | 1.1  | EML1    | echinoder m microtubule associated protein like 1 [Source:HGNC Symbol;Acc:3330] [ENST00000327921] | 2009   |
| A_23_P127793 | 1.6  | 2.0  | 1.0  | -2.0 | EML3    | Homo sapiens echinoder m microtubule associated protein like 3 (EML3), mRNA [NM_153265]           | 256364 |



|              |      |      |      |      |      |                                                                                                              |        |
|--------------|------|------|------|------|------|--------------------------------------------------------------------------------------------------------------|--------|
| A_23_P143127 | 1.9  | 3.4  | 3.1  | 2.2  | EML4 | Homo sapiens echinoderm microtubule associated protein like 4 (EML4), transcript variant 1, mRNA [NM_019063] | 27436  |
| A_24_P863775 | -2.9 | -1.3 | -1.4 | -1.4 | EML6 | Homo sapiens echinoderm microtubule associated protein like 6 (EML6), mRNA [NM_001039753]                    | 400954 |
| A_23_P106682 | -1.1 | -1.1 | -2.7 | -1.4 | EMP2 | Homo sapiens epithelial membrane protein 2 (EMP2), mRNA [NM_001424]                                          | 2013   |
| A_23_P304682 | 1.0  | -1.0 | -2.4 | 1.0  | EMP2 | Homo sapiens epithelial membrane protein 2 (EMP2), mRNA [NM_001424]                                          | 2013   |

|              |      |      |      |      |       |                                                                                          |        |
|--------------|------|------|------|------|-------|------------------------------------------------------------------------------------------|--------|
| A_24_P924611 | 18.2 | 17.0 | 22.0 | 17.8 | EMR4P | Homo sapiens G protein-coupled receptor 127 (GPR127) mRNA, partial cds. [AY181245]       | 326342 |
| A_23_P315122 | -1.3 | -1.8 | -2.0 | -3.4 | EMX1  | Homo sapiens empty spiracles homeobox 1 (EMX1), mRNA [NM_004097]                         | 2016   |
| A_23_P44264  | -4.0 | -1.2 | -1.2 | -1.5 | EMX2  | Homo sapiens empty spiracles homeobox 2 (EMX2), transcript variant 1, mRNA [NM_004098]   | 2018   |
| A_23_P337767 | -1.1 | -2.4 | -1.1 | -1.1 | ENAH  | Homo sapiens enabled homolog (Drosophila) (ENAH), transcript variant 2, mRNA [NM_018212] | 55740  |

|              |      |      |      |      |        |                                                                                             |       |
|--------------|------|------|------|------|--------|---------------------------------------------------------------------------------------------|-------|
| A_23_P51397  | -2.1 | -1.0 | -1.0 | -1.0 | ENAH   | Homo sapiens enabled homolog (Drosophila) (ENAH), transcript variant 1, mRNA [NM_001008493] | 55740 |
| A_24_P347310 | -2.0 | -2.1 | -2.2 | -2.0 | ENDOU  | Homo sapiens endonuclease, polyU-specific (ENDOU), transcript variant 2, mRNA [NM_006025]   | 8909  |
| A_23_P83328  | 1.8  | 2.1  | 1.6  | 1.4  | ENG    | Homo sapiens endoglin (ENG), transcript variant 2, mRNA [NM_000118]                         | 2022  |
| A_23_P152583 | -1.6 | -1.3 | -1.9 | -3.2 | ENGASE | Homo sapiens endo-beta-N-acetylglucosaminidase (ENGASE), mRNA [NM_001042573]                | 64772 |

|              |      |      |      |      |          |                                                                                               |           |
|--------------|------|------|------|------|----------|-----------------------------------------------------------------------------------------------|-----------|
| A_24_P115651 | 1.0  | -1.0 | -1.0 | -2.9 | ENKUR    | Homo sapiens enkurin, TRPC channel interacting protein (ENKUR), mRNA [NM_145010]              | 219670    |
| A_23_P137391 | -1.9 | 1.5  | 2.0  | -1.0 | ENO1     | Homo sapiens enolase 1, (alpha) (ENO1), transcript variant 1, mRNA [NM_001428]                | 2023      |
| A_32_P145447 | -2.6 | 1.0  | -1.0 | 1.0  | ENO1-AS1 | Homo sapiens ENO1 antisense RNA 1 (non-protein coding) (ENO1-AS1), non-coding RNA [NR_038351] | 100505975 |
| A_23_P121806 | -1.0 | -3.9 | -3.2 | -1.0 | ENOPH1   | Homo sapiens enolase-phosphatase 1 (ENOPH1), mRNA [NM_021204]                                 | 58478     |

|              |     |      |      |     |        |                                                                                           |        |
|--------------|-----|------|------|-----|--------|-------------------------------------------------------------------------------------------|--------|
| A_23_P156880 | 3.0 | 1.8  | 4.8  | 1.4 | ENPP1  | Homo sapiens ectonucleotide pyrophosphatase/phosphodiesterase 1 (ENPP1), mRNA [NM_006208] | 5167   |
| A_23_P10640  | 5.1 | 12.1 | 16.3 | 8.5 | ENPP7  | Homo sapiens ectonucleotide pyrophosphatase/phosphodiesterase 7 (ENPP7), mRNA [NM_178543] | 339221 |
| A_23_P410115 | 2.4 | 1.3  | 2.7  | 2.4 | ENTHD1 | Homo sapiens ENTH domain containing 1 (ENTHD1), mRNA [NM_152512]                          | 150350 |

|              |      |      |      |      |        |                                                                                                                |     |
|--------------|------|------|------|------|--------|----------------------------------------------------------------------------------------------------------------|-----|
| A_23_P24260  | 1.1  | 1.1  | -4.2 | 1.1  | ENTPD1 | Homo sapiens ectonucleoside triphosphate diphosphohydrolase 1 (ENTPD1), transcript variant 1, mRNA [NM_001776] | 953 |
| A_24_P335025 | -1.3 | -1.1 | -4.3 | -1.5 | ENTPD1 | Homo sapiens ectonucleoside triphosphate diphosphohydrolase 1 (ENTPD1), transcript variant 1, mRNA [NM_001776] | 953 |
| A_23_P395365 | 7.8  | 6.0  | 4.2  | 5.6  | ENTPD2 | Homo sapiens ectonucleoside triphosphate diphosphohydrolase 2 (ENTPD2), transcript variant 2, mRNA [NM_001246] | 954 |

|              |      |      |      |      |        |                                                                                                                                           |        |
|--------------|------|------|------|------|--------|-------------------------------------------------------------------------------------------------------------------------------------------|--------|
| A_24_P25452  | -1.0 | 1.3  | -5.7 | -1.0 | ENTPD5 | Homo sapiens ectonucleoside triphosphate diphosphohydrolase 5, mRNA (cDNA clone IMAGE:3847878), with apparent retained intron. [BC020966] | 957    |
| A_24_P916585 | 1.6  | 1.6  | 2.7  | 1.0  | ENTPD6 | Homo sapiens IL-6SAG (IL-6SAG) mRNA, partial cds. [AF058296]                                                                              | 955    |
| A_23_P44335  | 1.3  | -1.0 | -9.2 | -1.1 | ENTPD8 | Homo sapiens ectonucleoside triphosphate diphosphohydrolase 8 (ENTPD8), transcript variant 1, mRNA [NM_001033113]                         | 377841 |

|              |     |      |      |      |       |                                                                                                       |       |
|--------------|-----|------|------|------|-------|-------------------------------------------------------------------------------------------------------|-------|
| A_24_P81149  | 1.7 | 2.7  | 1.9  | 1.9  | ENY2  | Homo sapiens enhancer of yellow 2 homolog (Drosophila) (ENY2), transcript variant 1, mRNA [NM_020189] | 56943 |
| A_23_P430120 | 1.3 | -3.7 | -1.4 | -1.7 | EPAS1 | Homo sapiens endothelial PAS domain protein 1 (EPAS1), mRNA [NM_001430]                               | 2034  |
| A_23_P210210 | 1.5 | 1.4  | 2.1  | 1.2  | EPAS1 | Homo sapiens endothelial PAS domain protein 1 (EPAS1), mRNA [NM_001430]                               | 2034  |



|              |      |      |      |       |         |                                                                                                                                  |       |
|--------------|------|------|------|-------|---------|----------------------------------------------------------------------------------------------------------------------------------|-------|
| A_23_P160359 | -2.7 | 1.0  | 1.3  | -1.3  | EPB41   | Homo sapiens erythrocyte membrane protein band 4.1 (elliptocytosis 1, RH-linked) (EPB41), transcript variant 6, mRNA [NM_004437] | 2035  |
| A_23_P134109 | 1.0  | -1.0 | -1.1 | -15.2 | EPB41L2 | Homo sapiens erythrocyte membrane protein band 4.1-like 2 (EPB41L2), transcript variant 1, mRNA [NM_001431]                      | 2037  |
| A_23_P4536   | 2.0  | 1.4  | -1.5 | 1.4   | EPB41L3 | Homo sapiens erythrocyte membrane protein band 4.1-like 3 (EPB41L3), mRNA [NM_012307]                                            | 23136 |

|              |      |       |      |      |          |                                                                                                             |       |
|--------------|------|-------|------|------|----------|-------------------------------------------------------------------------------------------------------------|-------|
| A_24_P257579 | -1.1 | -11.3 | -1.2 | -1.2 | EPB41L4A | Homo sapiens erythrocyte membrane protein band 4.1 like 4A (EPB41L4A), mRNA [NM_022140]                     | 64097 |
| A_23_P370514 | 1.1  | 2.2   | 1.0  | 1.0  | EPB41L4B | Homo sapiens cDNA: FLJ21596 fis, clone COL07110. [AK025249]                                                 | 54566 |
| A_23_P416794 | 1.8  | -2.8  | 1.7  | -2.9 | EPB41L5  | Homo sapiens erythrocyte membrane protein band 4.1 like 5 (EPB41L5), transcript variant 1, mRNA [NM_020909] | 57669 |

|              |       |      |      |     |       |                                                                                                    |       |
|--------------|-------|------|------|-----|-------|----------------------------------------------------------------------------------------------------|-------|
| A_23_P140675 | -2.4  | 4.5  | 3.4  | 1.8 | EPB42 | Homo sapiens erythrocyte membrane protein band 4.2 (EPB42), transcript variant 1, mRNA [NM_000119] | 2038  |
| A_24_P252718 | -2.6  | 1.0  | 1.0  | 1.1 | EPC1  | enhancer of polycomb homolog 1 (Drosophila) [Source:HGNC Symbol;Acc:19876] [ENST00000319778]       | 80314 |
| A_23_P359738 | -13.0 | -1.7 | -1.9 | 1.0 | EPC2  | Homo sapiens enhancer of polycomb homolog 2 (Drosophila) (EPC2), mRNA [NM_015630]                  | 26122 |

|              |     |      |      |      |        |                                                                                                   |        |
|--------------|-----|------|------|------|--------|---------------------------------------------------------------------------------------------------|--------|
| A_24_P341923 | 1.3 | 1.1  | -1.9 | -2.1 | EPG5   | Homo sapiens ectopic P-granules autophagy protein 5 homolog (C. elegans) (EPG5), mRNA [NM_020964] | 57724  |
| A_24_P392146 | 1.4 | 1.1  | 1.6  | 2.1  | EPG5   | Homo sapiens ectopic P-granules autophagy protein 5 homolog (C. elegans) (EPG5), mRNA [NM_020964] | 57724  |
| A_23_P385199 | 1.1 | -1.1 | -5.3 | 1.2  | EPHA10 | Homo sapiens EPH receptor A10 (EPHA10), transcript variant 2, mRNA [NM_173641]                    | 284656 |

|              |      |     |       |      |        |                                                                                   |        |
|--------------|------|-----|-------|------|--------|-----------------------------------------------------------------------------------|--------|
| A_24_P930741 | -1.3 | 1.0 | -3.0  | 1.1  | EPHA10 | Homo sapiens EPH receptor A10 (EPHA10), transcript variant 3, mRNA [NM_001099439] | 284656 |
| A_23_P149281 | -1.2 | 1.0 | -2.8  | -1.2 | EPHA2  | Homo sapiens EPH receptor A2 (EPHA2), mRNA [NM_004431]                            | 1969   |
| A_24_P254744 | 3.3  | 2.1 | 2.0   | 2.2  | EPHA3  | Homo sapiens EPH receptor A3 (EPHA3), transcript variant 2, mRNA [NM_182644]      | 2042   |
| A_24_P274219 | 1.2  | 1.9 | -19.5 | 2.1  | EPHA4  | Homo sapiens EPH receptor A4 (EPHA4), mRNA [NM_004438]                            | 2043   |

|              |      |      |      |      |       |                                                                                 |      |
|--------------|------|------|------|------|-------|---------------------------------------------------------------------------------|------|
| A_23_P108501 | 2.1  | -1.6 | -1.0 | 1.0  | EPHA4 | Homo sapiens EPH receptor A4 (EPHA4), mRNA [NM_004438]                          | 2043 |
| A_24_P226332 | 1.4  | -2.2 | -1.4 | 1.5  | EPHA7 | Homo sapiens EPH receptor A7 (EPHA7), mRNA [NM_004440]                          | 2045 |
| A_23_P7835   | 1.1  | -2.0 | -1.3 | -1.8 | EPHA7 | Homo sapiens EPH receptor A7 (EPHA7), mRNA [NM_004440]                          | 2045 |
| A_24_P34031  | 2.2  | 2.1  | 1.9  | 3.3  | EPHA7 | EPH receptor A7 [Source:HGNC Symbol;Acc:3390] [ENST00000369297]                 | 2045 |
| A_24_P419239 | -2.3 | 1.2  | -1.1 | -1.0 | EPHA8 | Homo sapiens EPH receptor A8 (EPHA8), transcript variant 2, mRNA [NM_001006943] | 2046 |

|              |      |      |       |      |       |                                                                                                           |      |
|--------------|------|------|-------|------|-------|-----------------------------------------------------------------------------------------------------------|------|
| A_23_P318464 | 1.1  | -3.2 | 2.1   | 1.0  | EPHA8 | Homo sapiens EPH receptor A8 (EPHA8), transcript variant 1, mRNA [NM_020526]                              | 2046 |
| A_23_P95060  | -1.1 | -1.9 | -11.9 | -2.0 | EPHB3 | Homo sapiens EPH receptor B3 (EPHB3), mRNA [NM_004443]                                                    | 2049 |
| A_23_P145935 | 1.5  | 1.7  | -1.2  | -2.0 | EPHB6 | Homo sapiens EPH receptor B6 (EPHB6), mRNA [NM_004445]                                                    | 2051 |
| A_23_P34537  | -4.3 | -1.0 | -9.3  | 1.1  | EPHX1 | Homo sapiens epoxide hydrolase 1, microsomal (xenobiotic) (EPHX1), transcript variant 1, mRNA [NM_000120] | 2052 |

|              |      |     |      |      |       |                                                                                                                                   |        |
|--------------|------|-----|------|------|-------|-----------------------------------------------------------------------------------------------------------------------------------|--------|
| A_23_P119593 | 5.0  | 4.5 | 1.2  | -1.1 | EPHX3 | Homo sapiens epoxide hydrolase 3 (EPHX3), transcript variant 1, mRNA [NM_024794]                                                  | 79852  |
| A_23_P43898  | 2.0  | 1.1 | -1.0 | -1.0 | EPHX4 | Homo sapiens epoxide hydrolase 4 (EPHX4), mRNA [NM_173567]                                                                        | 253152 |
| A_24_P239419 | -2.3 | 1.2 | -1.1 | 1.6  | EPM2A | Homo sapiens epilepsy, progressive myoclonus type 2A, Lafora disease (laforin) (EPM2A), transcript variant 2, mRNA [NM_001018041] | 7957   |



|              |      |       |      |      |          |                                                                                                                                |       |
|--------------|------|-------|------|------|----------|--------------------------------------------------------------------------------------------------------------------------------|-------|
| A_23_P170600 | 2.4  | -1.0  | 1.0  | 2.2  | EPM2A    | Homo sapiens epilepsy, progressive myoclonus type 2A, Lafora disease (laforin) (EPM2A), transcript variant 1, mRNA [NM_005670] | 7957  |
| A_24_P627984 | -1.0 | -11.6 | -1.0 | -1.0 | EPM2AIP1 | Homo sapiens EPM2A (laforin) interacting protein 1 (EPM2AIP1), mRNA [NM_014805]                                                | 9852  |
| A_24_P102343 | 1.2  | -1.1  | -1.0 | -2.2 | EPN3     | Homo sapiens epsin 3 (EPN3), mRNA [NM_017957]                                                                                  | 55040 |
| A_23_P130027 | -2.2 | 1.8   | 1.9  | 1.3  | EPN3     | Homo sapiens epsin 3 (EPN3), mRNA [NM_017957]                                                                                  | 55040 |

|              |     |      |      |      |         |                                                                                                       |       |
|--------------|-----|------|------|------|---------|-------------------------------------------------------------------------------------------------------|-------|
| A_23_P367899 | 1.1 | 1.0  | -2.8 | -2.1 | EPOR    | Homo sapiens erythropoietin receptor (EPOR), transcript variant 1, mRNA [NM_000121]                   | 2057  |
| A_24_P914376 | 3.7 | 3.2  | 6.3  | 4.5  | EPOR    | H.sapiens mRNA for soluble erythropoietin receptor. [X57282]                                          | 2057  |
| A_24_P357169 | 2.2 | -1.0 | 1.3  | 1.7  | EPPK1   | Homo sapiens epiplakin 1 (EPPK1), mRNA [NM_031308]                                                    | 83481 |
| A_23_P38941  | 2.3 | -1.7 | 1.3  | -1.7 | EPS15L1 | Homo sapiens epidermal growth factor receptor pathway substrate 15-like 1 (EPS15L1), mRNA [NM_021235] | 58513 |

|              |     |     |      |      |      |                                                                                                    |       |
|--------------|-----|-----|------|------|------|----------------------------------------------------------------------------------------------------|-------|
| A_23_P136347 | 1.0 | 1.0 | -1.0 | 2.6  | EPS8 | Homo sapiens epidermal growth factor receptor pathway substrate 8 (EPS8), mRNA [NM_004447]         | 2059  |
| A_24_P940803 | 1.0 | 1.0 | -2.9 | -1.0 | EPT1 | Homo sapiens ethanolaminephosphotransferase 1 (CDP-ethanolamine-specific) (EPT1), mRNA [NM_033505] | 85465 |
| A_23_P68300  | 3.8 | 3.8 | 5.9  | 3.6  | EPT1 | Homo sapiens ethanolaminephosphotransferase 1 (CDP-ethanolamine-specific) (EPT1), mRNA [NM_033505] | 85465 |

|             |     |      |     |     |       |                                                                                                                                                                                |       |
|-------------|-----|------|-----|-----|-------|--------------------------------------------------------------------------------------------------------------------------------------------------------------------------------|-------|
| A_23_P30243 | 1.1 | -1.4 | 5.6 | 1.1 | ERAP2 | Homo sapiens endoplasmic reticulum aminopeptidase 2 (ERAP2), transcript variant 1, mRNA [NM_022350]                                                                            | 64167 |
| A_23_P89249 | 1.9 | 2.8  | 2.3 | 1.3 | ERBB2 | Homo sapiens v-erb-b2 erythroblastic leukemia viral oncogene homolog 2, neuro/glioblastoma derived oncogene homolog (avian) (ERBB2), transcript variant 2, mRNA [NM_001005862] | 2064  |

|              |      |      |      |      |       |                                                                                                                                |       |
|--------------|------|------|------|------|-------|--------------------------------------------------------------------------------------------------------------------------------|-------|
| A_23_P349416 | 1.2  | -2.6 | -1.1 | -1.1 | ERBB3 | Homo sapiens v-erb-b2 erythroblastic leukemia viral oncogene homolog 3 (avian) (ERBB3), transcript variant 1, mRNA [NM_001982] | 2065  |
| A_24_P694760 | -3.6 | -1.0 | 1.0  | 1.0  | ERC1  | Homo sapiens ELKS/RAB6-interacting/CAST family member 1 (ERC1), transcript variant epsilon, mRNA [NM_178040]                   | 23085 |
| A_24_P249784 | -2.0 | -1.1 | -1.1 | -1.1 | ERC1  | Homo sapiens ELKS/RAB6-interacting/CAST family member 1 (ERC1), transcript variant epsilon, mRNA [NM_178040]                   | 23085 |

|              |     |      |      |      |       |                                                                                                                                                                                              |      |
|--------------|-----|------|------|------|-------|----------------------------------------------------------------------------------------------------------------------------------------------------------------------------------------------|------|
| A_23_P107701 | 1.1 | -2.5 | -4.2 | -1.6 | ERCC1 | Homo sapiens excision repair cross-complementing rodent repair deficiency, complementation group 1 (includes overlapping antisense sequence) (ERCC1), transcript variant 2, mRNA [NM_001983] | 2067 |
| A_24_P401990 | 3.0 | 2.0  | 1.4  | 2.3  | ERCC2 | Homo sapiens excision repair cross-complementing rodent repair deficiency, complementation group 2 (ERCC2), transcript variant 1, mRNA [NM_000400]                                           | 2068 |

|              |     |      |     |     |       |                                                                                                                              |      |
|--------------|-----|------|-----|-----|-------|------------------------------------------------------------------------------------------------------------------------------|------|
| A_23_P117225 | 1.2 | -8.8 | 1.1 | 1.1 | ERCC5 | Homo sapiens excision repair cross-complementing rodent repair deficiency, complementation group 5 (ERCC5), mRNA [NM_000123] | 2073 |
| A_23_P1292   | 2.8 | 2.7  | 2.6 | 2.8 | ERCC6 | Homo sapiens excision repair cross-complementing rodent repair deficiency, complementation group 6 (ERCC6), mRNA [NM_000124] | 2074 |

|              |      |       |     |      |        |                                                                                                           |       |
|--------------|------|-------|-----|------|--------|-----------------------------------------------------------------------------------------------------------|-------|
| A_24_P97770  | 1.4  | 1.5   | 1.6 | -3.2 | ERGIC1 | Homo sapiens endoplasmic reticulum-golgi intermediate compartment (ERGIC) 1 (ERGIC1), mRNA [NM_001031711] | 57222 |
| A_23_P333227 | 1.3  | -10.3 | 1.4 | 1.8  | ERGIC1 | Homo sapiens endoplasmic reticulum-golgi intermediate compartment (ERGIC) 1 (ERGIC1), mRNA [NM_001031711] | 57222 |
| A_24_P216313 | -1.3 | 1.4   | 2.6 | 1.6  | ERGIC3 | Homo sapiens ERGIC and golgi 3 (ERGIC3), transcript variant 2, mRNA [NM_015966]                           | 51614 |



|              |      |      |      |      |        |                                                                                                     |        |
|--------------|------|------|------|------|--------|-----------------------------------------------------------------------------------------------------|--------|
| A_23_P128734 | -1.9 | -2.2 | 1.3  | -1.8 | ERH    | Homo sapiens enhancer of rudimentary homolog (Drosophila) (ERH), mRNA [NM_004450]                   | 2079   |
| A_24_P934800 | -3.3 | 1.0  | -1.1 | -1.0 | ERI2   | Homo sapiens ERI1 exoribonuclease family member 2 (ERI2), transcript variant 1, mRNA [NM_001142725] | 112479 |
| A_32_P155416 | 2.8  | 1.0  | 1.2  | 1.9  | ERI3   | Homo sapiens ERI1 exoribonuclease family member 3 (ERI3), mRNA [NM_024066]                          | 79033  |
| A_23_P39971  | 1.9  | 2.1  | 2.1  | 2.1  | ERLEC1 | Homo sapiens endoplasmic reticulum lectin 1 (ERLEC1), transcript variant 1, mRNA [NM_015701]        | 27248  |

|              |      |      |      |      |        |                                                                                          |       |
|--------------|------|------|------|------|--------|------------------------------------------------------------------------------------------|-------|
| A_23_P52219  | 1.5  | -3.2 | 1.2  | 5.7  | ERLIN1 | Homo sapiens ER lipid raft associated 1 (ERLIN1), mRNA [NM_006459]                       | 10613 |
| A_23_P123440 | 1.8  | 2.3  | 1.2  | -5.6 | ERLIN2 | Homo sapiens ER lipid raft associated 2 (ERLIN2), transcript variant 1, mRNA [NM_007175] | 11160 |
| A_24_P276873 | -7.5 | -1.1 | -1.2 | -1.1 | ERMN   | Homo sapiens ermin, ERM-like protein (ERMN), transcript variant 2, mRNA [NM_020711]      | 57471 |
| A_32_P387905 | -2.0 | -2.1 | -1.1 | -3.8 | ERO1L  | ERO1-like (S. cerevisiae) [Source:HGNC Symbol;Acc:13280] [ENST00000395686]               | 30001 |

|              |      |      |       |      |        |                                                                                               |        |
|--------------|------|------|-------|------|--------|-----------------------------------------------------------------------------------------------|--------|
| A_23_P347623 | 1.1  | -3.8 | -1.0  | -1.2 | ERO1LB | Homo sapiens ERO1-like beta (S. cerevisiae) (ERO1LB), mRNA [NM_019891]                        | 56605  |
| A_23_P347618 | -6.4 | 1.2  | -10.1 | -1.0 | ERO1LB | Homo sapiens ERO1-like beta (S. cerevisiae) (ERO1LB), mRNA [NM_019891]                        | 56605  |
| A_23_P139687 | 2.2  | 2.2  | 1.1   | 2.1  | ERP27  | Homo sapiens endoplasmic reticulum protein 27 (ERP27), mRNA [NM_152321]                       | 121506 |
| A_23_P139929 | -2.8 | -2.5 | -4.0  | -3.3 | ERP29  | Homo sapiens endoplasmic reticulum protein 29 (ERP29), transcript variant 1, mRNA [NM_006817] | 10961  |

|              |      |      |      |      |        |                                                                            |           |
|--------------|------|------|------|------|--------|----------------------------------------------------------------------------|-----------|
| A_23_P373927 | -1.0 | -7.8 | 1.0  | -1.0 | ERP44  | Homo sapiens endoplasmic reticulum protein 44 (ERP44), mRNA [NM_015051]    | 23071     |
| A_24_P11384  | 2.3  | 3.5  | 2.2  | 1.6  | ERRFI1 | Homo sapiens ERBB receptor feedback inhibitor 1 (ERRFI1), mRNA [NM_018948] | 54206     |
| A_24_P324577 | -2.1 | 1.0  | 1.0  | 1.0  | ERV3-2 | Homo sapiens mRNA for KIAA1466 protein, partial cds. [AB040899]            | 57612     |
| A_24_P324581 | 2.1  | 1.4  | 2.0  | 1.1  | ERV3-2 | Homo sapiens mRNA for KIAA1466 protein, partial cds. [AB040899]            | 57612     |
| A_24_P248007 | -2.0 | -3.2 | -1.8 | -1.5 | ERVH-3 | Homo sapiens mRNA, endogenous retrovirus. [AB128832]                       | 100289683 |

|             |      |      |      |      |          |                                                                                                       |           |
|-------------|------|------|------|------|----------|-------------------------------------------------------------------------------------------------------|-----------|
| A_23_P95599 | -1.0 | 2.4  | 1.9  | 1.3  | ERVK13-1 | Homo sapiens endogenous retrovirus group K13, member 1 (ERVK13-1), non-coding RNA [NR_040023]         | 100507321 |
| A_32_P4466  | 1.3  | -2.9 | -2.3 | -1.2 | ERVV-2   | Homo sapiens endogenous retrovirus group V, member 2 (ERVV-2), mRNA [NM_001191055]                    | 100271846 |
| A_23_P31443 | -2.8 | -3.8 | -2.4 | -1.3 | ERVW-1   | Homo sapiens endogenous retrovirus group W, member 1 (ERVW-1), transcript variant 1, mRNA [NM_014590] | 30816     |
| A_24_P13190 | -7.8 | 1.6  | 1.4  | -1.1 | ESAM     | Homo sapiens endothelial cell adhesion molecule (ESAM), mRNA [NM_138961]                              | 90952     |

|              |      |     |      |      |       |                                                                                                  |       |
|--------------|------|-----|------|------|-------|--------------------------------------------------------------------------------------------------|-------|
| A_24_P37873  | -5.7 | 1.3 | -1.3 | -1.2 | ESM1  | Homo sapiens endothelial cell-specific molecule 1 (ESM1), transcript variant 1, mRNA [NM_007036] | 11082 |
| A_32_P901770 | 1.9  | 2.4 | 2.3  | 2.4  | ESPN  | Homo sapiens espin (ESPN), mRNA [NM_031475]                                                      | 83715 |
| A_24_P383478 | 2.0  | 3.4 | 2.4  | 2.2  | ESR1  | Homo sapiens estrogen receptor 1 (ESR1), transcript variant 1, mRNA [NM_000125]                  | 2099  |
| A_23_P100220 | 1.8  | 1.6 | -3.4 | -1.0 | ESRP2 | Homo sapiens epithelial splicing regulatory protein 2 (ESRP2), mRNA [NM_024939]                  | 80004 |

|              |     |      |      |      |       |                                                                                                    |       |
|--------------|-----|------|------|------|-------|----------------------------------------------------------------------------------------------------|-------|
| A_23_P391857 | 1.9 | -1.2 | 2.6  | 1.2  | ESRRB | Homo sapiens estrogen-related receptor beta (ESRRB), mRNA [NM_004452]                              | 2103  |
| A_24_P415928 | 1.3 | 1.3  | -1.2 | -2.3 | ESRRB | Homo sapiens estrogen-related receptor beta (ESRRB), mRNA [NM_004452]                              | 2103  |
| A_24_P7965   | 4.1 | 6.4  | -1.2 | 1.6  | ESRRG | Homo sapiens estrogen-related receptor gamma (ESRRG), transcript variant 2, mRNA [NM_206594]       | 2104  |
| A_23_P150852 | 1.5 | 2.5  | 1.4  | -1.0 | ESYT1 | Homo sapiens extended synaptotagmin-like protein 1 (ESYT1), transcript variant 2, mRNA [NM_015292] | 23344 |

|              |     |     |      |      |       |                                                                              |       |
|--------------|-----|-----|------|------|-------|------------------------------------------------------------------------------|-------|
| A_24_P132470 | 1.5 | 1.4 | -3.7 | -1.0 | ESYT2 | Homo sapiens extended synaptotagmin-like protein 2 (ESYT2), mRNA [NM_020728] | 57488 |
| A_24_P697685 | 2.6 | 1.0 | 1.4  | 2.7  | ESYT3 | Homo sapiens extended synaptotagmin-like protein 3 (ESYT3), mRNA [NM_031913] | 83850 |
| A_23_P51117  | 4.0 | 3.9 | 30.9 | 3.7  | ETAA1 | Homo sapiens Ewing tumor-associated antigen 1 (ETAA1), mRNA [NM_019002]      | 54465 |



|              |      |      |      |      |       |                                                                                                                                                            |       |
|--------------|------|------|------|------|-------|------------------------------------------------------------------------------------------------------------------------------------------------------------|-------|
| A_32_P119616 | -1.3 | -2.6 | -1.4 | -1.7 | ETFA  | Homo sapiens electron-transfer-flavoprotein, alpha polypeptide (ETFA), nuclear gene encoding mitochondrial protein, transcript variant 1, mRNA [NM_000126] | 2108  |
| A_23_P419239 | -8.3 | 2.9  | -1.5 | 1.9  | ETNK1 | Homo sapiens ethanolamine kinase 1 (ETNK1), transcript variant 1, mRNA [NM_018638]                                                                         | 55500 |
| A_24_P751074 | 2.0  | 2.1  | 2.1  | -7.8 | ETS1  | Homo sapiens v-ets erythroblastosis virus E26 oncogene homolog 1 (avian) (ETS1), transcript variant 2, mRNA [NM_005238]                                    | 2113  |

|              |      |      |      |      |      |                                                                          |       |
|--------------|------|------|------|------|------|--------------------------------------------------------------------------|-------|
| A_23_P400945 | -1.0 | -1.5 | -2.0 | -1.5 | ETV3 | Homo sapiens variant 3 (ETV3), transcript variant 2, mRNA [NM_005240]    | 2117  |
| A_24_P416346 | 1.8  | -1.3 | 2.1  | 1.5  | ETV4 | Homo sapiens variant 4 (ETV4), transcript variant 2, mRNA [NM_001079675] | 2118  |
| A_23_P9836   | 2.0  | 2.0  | 1.9  | -3.1 | ETV5 | Homo sapiens variant 5 (ETV5), mRNA [NM_004454]                          | 2119  |
| A_24_P372862 | 1.9  | 2.0  | 2.1  | 1.0  | ETV6 | Homo sapiens variant 6 (ETV6), mRNA [NM_001987]                          | 2120  |
| A_23_P42353  | 4.2  | -1.8 | -2.1 | -2.0 | ETV7 | Homo sapiens variant 7 (ETV7), transcript variant 1, mRNA [NM_016135]    | 51513 |

|              |       |      |      |      |       |                                                                                                      |        |
|--------------|-------|------|------|------|-------|------------------------------------------------------------------------------------------------------|--------|
| A_23_P167051 | 6.2   | 6.1  | 4.4  | 2.9  | EVC   | Ellis van Creveld syndrome [Source:H GNC Symbol;Access:3497] [ENST00000382674]                       | 2121   |
| A_23_P78092  | 1.2   | 1.1  | -1.1 | -3.9 | EVI2A | Homo sapiens ecotropic viral integration site 2A (EVI2A), transcript variant 1, mRNA [NM_001003927]  | 2123   |
| A_23_P101427 | -5.8  | 2.5  | 1.4  | 1.2  | EVI5L | Homo sapiens ecotropic viral integration site 5-like (EVI5L), transcript variant 2, mRNA [NM_145245] | 115704 |
| A_24_P942648 | -13.0 | -1.0 | -1.1 | 1.0  | EVL   | Homo sapiens mRNA; cDNA DKFZp586G1721 (from clone DKFZp586G1721). [AL133642]                         | 51466  |

|              |      |     |      |      |       |                                                                                                |        |
|--------------|------|-----|------|------|-------|------------------------------------------------------------------------------------------------|--------|
| A_23_P140427 | 3.4  | 3.2 | 3.1  | 3.1  | EVL   | Homo sapiens Enah/Vasp-like (EVL), mRNA [NM_016337]                                            | 51466  |
| A_32_P141682 | -1.9 | 1.2 | -3.1 | -1.1 | EVPLL | Homo sapiens envoplakin-like (EVPLL), mRNA [NM_001145127]                                      | 645027 |
| A_24_P368943 | -1.0 | 1.6 | 1.1  | 3.2  | EVX1  | Homo sapiens even-skipped homeobox 1 (EVX1), mRNA [NM_001989]                                  | 2128   |
| A_23_P91657  | 1.3  | 1.6 | -1.8 | -3.0 | EWSR1 | Homo sapiens Ewing sarcoma breakpoint region 1 (EWSR1), transcript variant 1, mRNA [NM_013986] | 2130   |

|              |     |     |      |     |       |                                                                                                   |       |
|--------------|-----|-----|------|-----|-------|---------------------------------------------------------------------------------------------------|-------|
| A_24_P384578 | 3.4 | 1.4 | 1.1  | 3.3 | EWSR1 | Homo sapiens Ewing sarcoma breakpoint region 1 (EWSR1), transcript variant 1, mRNA [NM_013986]    | 2130  |
| A_24_P384573 | 5.8 | 4.2 | -2.6 | 1.5 | EWSR1 | Homo sapiens Ewing sarcoma breakpoint region 1 (EWSR1), transcript variant 1, mRNA [NM_013986]    | 2130  |
| A_23_P205296 | 6.6 | 4.1 | 2.4  | 4.3 | EXD2  | Homo sapiens exonuclease 3'-5' domain containing 2 (EXD2), transcript variant 5, mRNA [NM_018199] | 55218 |

|              |      |      |      |      |         |                                                                                                               |        |
|--------------|------|------|------|------|---------|---------------------------------------------------------------------------------------------------------------|--------|
| A_23_P170088 | -1.0 | -4.4 | -1.2 | -1.7 | EXD3    | Homo sapiens exonuclease 3'-5' domain containing 3, mRNA (cDNA clone IMAGE:6023681), complete cds. [BC065002] | 54932  |
| A_23_P214354 | -4.0 | 1.1  | 1.1  | -1.5 | EXOC2   | Homo sapiens exocyst complex component 2 (EXOC2), mRNA [NM_018303]                                            | 55770  |
| A_23_P424734 | 1.2  | 1.4  | 1.5  | -2.2 | EXOC3L1 | Homo sapiens exocyst complex component 3-like 1 (EXOC3L1), mRNA [NM_178516]                                   | 283849 |
| A_23_P38860  | 2.4  | 1.6  | 1.4  | -1.5 | EXOC3L2 | Homo sapiens exocyst complex component 3-like 2 (EXOC3L2), mRNA [NM_138568]                                   | 90332  |

|              |      |      |      |      |       |                                                                                             |       |
|--------------|------|------|------|------|-------|---------------------------------------------------------------------------------------------|-------|
| A_24_P7946   | -1.0 | -2.1 | -1.0 | 1.4  | EXOC4 | Homo sapiens exocyst complex component 4 (EXOC4), transcript variant 2, mRNA [NM_001037126] | 60412 |
| A_24_P392265 | -3.6 | 1.7  | 1.6  | 1.0  | EXOC5 | Homo sapiens exocyst complex component 5 (EXOC5), mRNA [NM_006544]                          | 10640 |
| A_23_P14464  | 2.3  | 1.5  | 1.4  | 1.3  | EXOC5 | Homo sapiens exocyst complex component 5 (EXOC5), mRNA [NM_006544]                          | 10640 |
| A_32_P58280  | -1.2 | -2.2 | -1.1 | -1.8 | EXOC6 | Homo sapiens exocyst complex component 6 (EXOC6), transcript variant 1, mRNA [NM_019053]    | 54536 |

|              |      |      |       |      |        |                                                                 |        |
|--------------|------|------|-------|------|--------|-----------------------------------------------------------------|--------|
| A_23_P415820 | -1.0 | -1.5 | -1.3  | -2.3 | EXOC6B | Homo sapiens mRNA for KIAA0919 protein, partial cds. [AB023136] | 23233  |
| A_23_P32463  | 4.0  | 3.3  | 2.1   | 1.3  | EXOSC4 | Homo sapiens exosome component 4 (EXOSC4), mRNA [NM_019037]     | 54512  |
| A_24_P211151 | -1.0 | -2.4 | -10.9 | -1.1 | EXOSC5 | Homo sapiens exosome component 5 (EXOSC5), mRNA [NM_020158]     | 56915  |
| A_24_P39639  | -6.1 | -1.7 | -2.0  | -1.7 | EXOSC6 | Homo sapiens exosome component 6 (EXOSC6), mRNA [NM_058219]     | 118460 |
| A_24_P937691 | 3.2  | 3.1  | 2.9   | 3.1  | EXPH5  | Homo sapiens exophilin 5 (EXPH5), mRNA [NM_015065]              | 23086  |



|              |       |      |      |      |       |                                                                              |      |
|--------------|-------|------|------|------|-------|------------------------------------------------------------------------------|------|
| A_23_P13183  | -14.8 | 1.1  | -1.0 | -1.0 | EXT2  | Homo sapiens exostosin 2 (EXT2), transcript variant 1, mRNA [NM_000401]      | 2132 |
| A_23_P62999  | -2.1  | 1.5  | 1.5  | 1.0  | EXTL1 | Homo sapiens exostoses (multiple)-like 1 (EXTL1), mRNA [NM_004455]           | 2134 |
| A_24_P122658 | -3.7  | 1.0  | -1.0 | 1.0  | EYA3  | Homo sapiens eyes absent homolog 3 (Drosophila) (EYA3), mRNA [NM_001990]     | 2140 |
| A_23_P167674 | -1.2  | -2.4 | -2.4 | -2.3 | F12   | Homo sapiens coagulation factor XII (Hageman factor) (F12), mRNA [NM_000505] | 2161 |

|              |      |      |      |      |       |                                                                                         |      |
|--------------|------|------|------|------|-------|-----------------------------------------------------------------------------------------|------|
| A_32_P140139 | 1.4  | 1.0  | 1.4  | -2.8 | F13A1 | Homo sapiens coagulation factor XIII, A1 polypeptide (F13A1), mRNA [NM_000129]          | 2162 |
| A_23_P46549  | 1.1  | -3.5 | -1.9 | -2.5 | F13B  | Homo sapiens coagulation factor XIII, B polypeptide (F13B), mRNA [NM_001994]            | 2165 |
| A_32_P60065  | -8.7 | 1.1  | -1.0 | 1.0  | F2RL2 | Homo sapiens coagulation factor II (thrombin) receptor-like 2 (F2RL2), mRNA [NM_004101] | 2151 |
| A_23_P208422 | -2.4 | 1.0  | -1.0 | 1.0  | F2RL3 | Homo sapiens coagulation factor II (thrombin) receptor-like 3 (F2RL3), mRNA [NM_003950] | 9002 |

|              |      |      |      |      |    |                                                                                                                             |      |
|--------------|------|------|------|------|----|-----------------------------------------------------------------------------------------------------------------------------|------|
| A_23_P126782 | 1.0  | -2.3 | -1.0 | -1.1 | F3 | Homo sapiens coagulation factor III (thromboplastin, tissue factor) (F3), transcript variant 1, mRNA [NM_001993]            | 2152 |
| A_24_P172738 | 1.1  | -1.3 | 2.1  | 1.1  | F7 | Homo sapiens coagulation factor VII (serum prothrombin conversion accelerator) (F7), transcript variant 1, mRNA [NM_000131] | 2155 |
| A_23_P117298 | -1.4 | 5.4  | 1.4  | 1.9  | F7 | Homo sapiens coagulation factor VII (serum prothrombin conversion accelerator) (F7), transcript variant 1, mRNA [NM_000131] | 2155 |

|              |      |      |      |      |        |                                                                                                           |        |
|--------------|------|------|------|------|--------|-----------------------------------------------------------------------------------------------------------|--------|
| A_24_P314451 | -2.7 | -1.7 | -3.7 | -4.2 | F8     | Homo sapiens coagulation factor VIII, procoagulant component (F8), transcript variant 1, mRNA [NM_000132] | 2157   |
| A_23_P11262  | 6.3  | 9.2  | 5.9  | 5.0  | F8A1   | Homo sapiens coagulation factor VIII-associated 1 (F8A1), mRNA [NM_012151]                                | 8263   |
| A_23_P62406  | -3.7 | -1.0 | -1.0 | -1.0 | F9     | Homo sapiens coagulation factor IX (F9), mRNA [NM_000133]                                                 | 2158   |
| A_24_P558365 | -1.9 | -1.2 | -2.2 | -3.0 | FABP12 | Homo sapiens fatty acid binding protein 12 (FABP12), mRNA [NM_001105281]                                  | 646486 |

|             |      |     |      |      |       |                                                                                                                                       |      |
|-------------|------|-----|------|------|-------|---------------------------------------------------------------------------------------------------------------------------------------|------|
| A_32_P5673  | -1.0 | 3.2 | -1.0 | 2.2  | FABP3 | 60240512<br>6F1<br>NIH_MGC<br>_21 Homo<br>sapiens<br>cDNA<br>clone<br>IMAGE:45<br>42655 5',<br>mRNA<br>sequence<br>[BG33670<br>2]     | 2170 |
| A_23_P59877 | 2.0  | 2.0 | 2.0  | 1.0  | FABP5 | Homo<br>sapiens<br>fatty acid<br>binding<br>protein 5<br>(psoriasis-<br>associated<br>) (FABP5),<br>mRNA<br>[NM_0014<br>44]           | 2171 |
| A_23_P43846 | -2.2 | 1.0 | -1.5 | -1.5 | FABP6 | Homo<br>sapiens<br>fatty acid<br>binding<br>protein 6,<br>ileal<br>(FABP6),<br>transcript<br>variant 1,<br>mRNA<br>[NM_0010<br>40442] | 2172 |

|              |      |      |      |      |       |                                                                                 |       |
|--------------|------|------|------|------|-------|---------------------------------------------------------------------------------|-------|
| A_24_P278637 | -1.3 | -1.4 | -2.3 | -6.8 | FADD  | Homo sapiens Fas (TNFRSF6)-associated via death domain (FADD), mRNA [NM_003824] | 8772  |
| A_23_P98580  | 1.4  | 3.2  | -1.1 | -1.1 | FADS2 | Homo sapiens fatty acid desaturase 2 (FADS2), mRNA [NM_004265]                  | 9415  |
| A_23_P156109 | -1.6 | 1.3  | 1.1  | -2.9 | FAF2  | Homo sapiens Fas associated factor family member 2 (FAF2), mRNA [NM_014613]     | 23197 |

|              |      |      |      |      |        |                                                                                                                                                             |       |
|--------------|------|------|------|------|--------|-------------------------------------------------------------------------------------------------------------------------------------------------------------|-------|
|              |      |      |      |      |        | Homo sapiens fumarylacetoacetate hydrolase domain containing 1 (FAHD1), nuclear gene encoding mitochondrial protein, transcript variant 2, mRNA [NM_031208] |       |
| A_23_P118300 | 3.1  | 3.0  | 4.4  | 3.0  | FAHD1  |                                                                                                                                                             | 81889 |
|              |      |      |      |      |        | Homo sapiens fumarylacetoacetate hydrolase domain containing 2A (FAHD2A), mRNA [NM_016044]                                                                  |       |
| A_23_P5731   | -1.2 | -1.2 | -2.5 | -3.8 | FAHD2A |                                                                                                                                                             | 51011 |
|              |      |      |      |      |        | Homo sapiens Fas apoptotic inhibitory molecule 2 (FAIM2), mRNA [NM_012306]                                                                                  |       |
| A_23_P139891 | 7.9  | 5.6  | 5.5  | 5.6  | FAIM2  |                                                                                                                                                             | 23017 |

|              |      |      |      |      |        |                                                                                                           |      |
|--------------|------|------|------|------|--------|-----------------------------------------------------------------------------------------------------------|------|
| A_23_P138125 | -1.3 | -1.2 | -2.7 | -1.1 | FAIM3  | Homo sapiens Fas apoptotic inhibitory molecule 3 (FAIM3), transcript variant 1, mRNA [NM_005449]          | 9214 |
| A_23_P356021 | 2.2  | 3.2  | 2.1  | 1.8  | FANCB  | Homo sapiens Fanconi anemia, complementation group B (FANCB), transcript variant 1, mRNA [NM_001018113]   | 2187 |
| A_32_P24165  | -4.6 | 1.1  | 1.1  | 1.0  | FANCD2 | Homo sapiens Fanconi anemia, complementation group D2 (FANCD2), transcript variant 2, mRNA [NM_001018115] | 2177 |



|              |      |      |      |      |       |                                                                                     |       |
|--------------|------|------|------|------|-------|-------------------------------------------------------------------------------------|-------|
| A_23_P404211 | -1.9 | -2.0 | -2.2 | -4.4 | FANCM | Homo sapiens Fanconi anemia, complementation group M (FANCM), mRNA [NM_020937]      | 57697 |
| A_24_P163920 | 1.5  | 1.3  | -4.1 | -1.9 | FAR1  | Homo sapiens fatty acyl CoA reductase 1 (FAR1), mRNA [NM_032228]                    | 84188 |
| A_23_P150903 | -1.0 | -3.0 | -4.5 | -4.6 | FAR2  | Homo sapiens fatty acyl CoA reductase 2 (FAR2), mRNA [NM_018099]                    | 55711 |
| A_23_P90855  | -1.9 | 1.1  | -2.9 | -1.2 | FARP2 | Homo sapiens FERM, RhoGEF and pleckstrin domain protein 2 (FARP2), mRNA [NM_014808] | 9855  |

|              |      |      |      |      |         |                                                                                                    |       |
|--------------|------|------|------|------|---------|----------------------------------------------------------------------------------------------------|-------|
| A_23_P78685  | 1.6  | 3.0  | 2.8  | -1.1 | FARSA   | Homo sapiens phenylalanyl-tRNA synthetase, alpha subunit (FARSA), mRNA [NM_004461]                 | 2193  |
| A_23_P502930 | 2.2  | 1.5  | 1.8  | 1.6  | FASTK   | Homo sapiens Fas-activated serine/threonine kinase (FASTK), transcript variant 1, mRNA [NM_006712] | 10922 |
| A_23_P28590  | -2.9 | -1.2 | -1.9 | 2.1  | FASTKD1 | Homo sapiens FAST kinase domains 1 (FASTKD1), mRNA [NM_024622]                                     | 79675 |
| A_23_P209649 | 8.5  | 8.4  | 8.0  | 8.3  | FASTKD2 | Homo sapiens FAST kinase domains 2 (FASTKD2), transcript variant 3, mRNA [NM_014929]               | 22868 |

|              |      |      |      |      |         |                                                                                             |        |
|--------------|------|------|------|------|---------|---------------------------------------------------------------------------------------------|--------|
| A_23_P58489  | 1.1  | 1.1  | 1.1  | -2.2 | FASTKD3 | Homo sapiens FAST kinase domains 3 (FASTKD3), transcript variant 1, mRNA [NM_024091]        | 79072  |
| A_23_P380724 | 1.0  | 1.0  | -8.2 | 1.0  | FASTKD5 | Homo sapiens FAST kinase domains 5 (FASTKD5), mRNA [NM_021826]                              | 60493  |
| A_32_P206415 | -1.0 | 2.2  | -1.0 | -1.0 | FAT3    | Homo sapiens FAT tumor suppressor homolog 3 (Drosophila) (FAT3), mRNA [NM_001008781]        | 120114 |
| A_24_P73848  | -1.2 | -1.3 | -2.5 | -1.3 | FBF1    | Homo sapiens cDNA FLJ32699 fis, clone TESTI2000435, weakly similar to CALDESMON. [AK057261] | 85302  |

|              |      |      |      |       |        |                                                                                                |        |
|--------------|------|------|------|-------|--------|------------------------------------------------------------------------------------------------|--------|
| A_23_P23457  | 1.1  | -4.1 | -1.5 | 1.2   | FBLIM1 | Homo sapiens filamin binding LIM protein 1 (FBLIM1), transcript variant 2, mRNA [NM_001024215] | 54751  |
| A_24_P94222  | -1.0 | 1.1  | -1.3 | -11.9 | FBLIM1 | Homo sapiens filamin binding LIM protein 1 (FBLIM1), transcript variant 1, mRNA [NM_017556]    | 54751  |
| A_23_P102462 | 1.9  | -1.1 | -1.1 | 4.1   | FBLN7  | Homo sapiens fibulin 7 (FBLN7), transcript variant 1, mRNA [NM_153214]                         | 129804 |
| A_23_P65678  | -2.6 | -1.1 | -1.1 | -1.1  | FBN1   | Homo sapiens fibrillin 1 (FBN1), mRNA [NM_000138]                                              | 2200   |
| A_23_P101893 | -1.3 | -2.8 | -3.0 | -1.6  | FBN3   | Homo sapiens fibrillin 3 (FBN3), mRNA [NM_032447]                                              | 84467  |

|              |      |      |      |      |        |                                                                                           |        |
|--------------|------|------|------|------|--------|-------------------------------------------------------------------------------------------|--------|
| A_23_P257111 | -1.0 | -1.1 | -1.2 | -2.2 | FBP1   | Homo sapiens fructose-1,6-bisphosphatase 1 (FBP1), transcript variant 1, mRNA [NM_000507] | 2203   |
| A_24_P279263 | 2.8  | 1.5  | -1.0 | 1.9  | FBRS   | Homo sapiens fibrosin (FBRS), mRNA [NM_001105079]                                         | 64319  |
| A_24_P280497 | -2.6 | 1.3  | 1.2  | 1.3  | FBRS1  | Homo sapiens fibrosin-like 1 (FBRS1), mRNA [NM_001142641]                                 | 57666  |
| A_23_P36724  | 1.9  | -1.2 | -2.6 | -1.3 | FBXL14 | Homo sapiens F-box and leucine-rich repeat protein 14 (FBXL14), mRNA [NM_152441]          | 144699 |

|              |      |     |      |      |        |                                                                                           |       |
|--------------|------|-----|------|------|--------|-------------------------------------------------------------------------------------------|-------|
| A_23_P12635  | -4.1 | 1.8 | 1.1  | 1.3  | FBXL15 | Homo sapiens F-box and leucine-rich repeat protein 15 (FBXL15), mRNA [NM_024326]          | 79176 |
| A_23_P396322 | 3.1  | 3.4 | 3.4  | 2.9  | FBXL17 | F-box and leucine-rich repeat protein 17 [Source:HGNC Symbol;Acc:13615] [ENST00000496714] | 64839 |
| A_23_P423957 | -3.6 | 1.1 | -1.2 | -1.4 | FBXL18 | Homo sapiens F-box and leucine-rich repeat protein 18 (FBXL18), mRNA [NM_024963]          | 80028 |
| A_24_P307854 | 4.3  | 5.4 | 4.0  | 1.6  | FBXL18 | Homo sapiens F-box and leucine-rich repeat protein 18 (FBXL18), mRNA [NM_024963]          | 80028 |

|              |      |       |      |      |        |                                                                                                        |        |
|--------------|------|-------|------|------|--------|--------------------------------------------------------------------------------------------------------|--------|
| A_23_P141146 | 1.6  | 1.6   | 2.0  | 1.4  | FBXL20 | Homo sapiens F-box and leucine-rich repeat protein 20 (FBXL20), transcript variant 1, mRNA [NM_032875] | 84961  |
| A_32_P334875 | -1.5 | -1.5  | -1.9 | -2.9 | FBXL22 | Homo sapiens F-box and leucine-rich repeat protein 22 (FBXL22), mRNA [NM_203373]                       | 283807 |
| A_23_P140069 | 1.1  | 1.0   | 1.1  | -2.2 | FBXL3  | Homo sapiens F-box and leucine-rich repeat protein 3 (FBXL3), mRNA [NM_012158]                         | 26224  |
| A_32_P108748 | 1.1  | -15.0 | 1.5  | 1.0  | FBXL5  | F-box and leucine-rich repeat protein 5 [Source:HGNC Symbol;Acc:13602] [ENST00000514541]               | 26234  |

|              |      |      |      |      |        |                                                                                                      |       |
|--------------|------|------|------|------|--------|------------------------------------------------------------------------------------------------------|-------|
| A_23_P43296  | -1.1 | 1.7  | -1.1 | 2.6  | FBXL6  | Homo sapiens F-box and leucine-rich repeat protein 6 (FBXL6), transcript variant 1, mRNA [NM_012162] | 26233 |
| A_24_P7600   | 23.3 | 9.2  | 12.8 | 9.0  | FBXL7  | Homo sapiens F-box and leucine-rich repeat protein 7 (FBXL7), mRNA [NM_012304]                       | 23194 |
| A_32_P57453  | -1.0 | -1.4 | -1.1 | -3.6 | FBXO10 | Homo sapiens F-box protein 10 (FBXO10), mRNA [NM_012166]                                             | 26267 |
| A_24_P357536 | 2.9  | 2.9  | 3.0  | 2.9  | FBXO11 | Homo sapiens F-box protein 11 (FBXO11), transcript variant 4, mRNA [NM_001190274]                    | 80204 |



|              |      |      |      |      |        |                                                                                   |        |
|--------------|------|------|------|------|--------|-----------------------------------------------------------------------------------|--------|
| A_23_P356101 | 2.2  | 2.1  | 1.5  | 1.7  | FBXO11 | Homo sapiens F-box protein 11 (FBXO11), transcript variant 4, mRNA [NM_001190274] | 80204  |
| A_23_P342709 | -1.0 | -1.4 | -2.1 | -1.8 | FBXO15 | Homo sapiens F-box protein 15 (FBXO15), transcript variant 1, mRNA [NM_152676]    | 201456 |
| A_23_P45999  | -4.4 | 1.1  | 1.2  | 1.6  | FBXO2  | Homo sapiens F-box protein 2 (FBXO2), mRNA [NM_012168]                            | 26232  |
| A_24_P13715  | 1.6  | 2.1  | 2.1  | 2.1  | FBXO22 | Homo sapiens F-box protein 22 (FBXO22), transcript variant 1, mRNA [NM_147188]    | 26263  |
| A_23_P65870  | -1.6 | -2.5 | -1.5 | 1.3  | FBXO22 | Homo sapiens F-box protein 22 (FBXO22), transcript variant 2, mRNA [NM_012170]    | 26263  |

|              |      |      |      |      |        |                                                                                |       |
|--------------|------|------|------|------|--------|--------------------------------------------------------------------------------|-------|
| A_23_P70888  | 1.0  | -1.3 | -3.0 | -1.7 | FBXO24 | Homo sapiens F-box protein 24 (FBXO24), transcript variant 1, mRNA [NM_033506] | 26261 |
| A_23_P363831 | -2.6 | 1.2  | -6.1 | 1.5  | FBXO3  | Homo sapiens F-box protein 3 (FBXO3), transcript variant 2, mRNA [NM_033406]   | 26273 |
| A_23_P256231 | -2.1 | -1.0 | -1.0 | 1.0  | FBXO30 | Homo sapiens F-box protein 30 (FBXO30), mRNA [NM_032145]                       | 84085 |
| A_24_P919493 | 2.3  | 2.3  | 2.3  | 2.4  | FBXO34 | Homo sapiens F-box protein 34 (FBXO34), transcript variant 1, mRNA [NM_017943] | 55030 |
| A_23_P117527 | -1.0 | -1.1 | -5.3 | -2.1 | FBXO34 | Homo sapiens F-box protein 34 (FBXO34), transcript variant 1, mRNA [NM_017943] | 55030 |

|              |      |      |      |      |        |                                                                                |       |
|--------------|------|------|------|------|--------|--------------------------------------------------------------------------------|-------|
| A_23_P146811 | -1.8 | -1.8 | -2.5 | -2.9 | FBXO38 | Homo sapiens F-box protein 38 (FBXO38), transcript variant 2, mRNA [NM_205836] | 81545 |
| A_23_P121013 | -3.5 | -1.9 | -1.6 | -5.1 | FBXO40 | Homo sapiens F-box protein 40 (FBXO40), mRNA [NM_016298]                       | 51725 |
| A_23_P8241   | -1.2 | -1.2 | -4.7 | -1.3 | FBXO5  | Homo sapiens F-box protein 5 (FBXO5), transcript variant 1, mRNA [NM_012177]   | 26271 |
| A_23_P97064  | 3.0  | -1.8 | -1.1 | 1.4  | FBXO6  | Homo sapiens F-box protein 6 (FBXO6), mRNA [NM_018438]                         | 26270 |
| A_24_P106522 | -1.0 | -3.0 | -1.1 | 5.2  | FBXO9  | Homo sapiens F-box protein 9 (FBXO9), transcript variant 2, mRNA [NM_033480]   | 26268 |

|              |      |      |      |      |        |                                                                                                        |       |
|--------------|------|------|------|------|--------|--------------------------------------------------------------------------------------------------------|-------|
| A_23_P218358 | -2.2 | -2.2 | -2.3 | -2.3 | FBXW10 | Homo sapiens F-box and WD repeat domain containing 10 (FBXW10), mRNA [NM_031456]                       | 10517 |
| A_24_P257539 | -1.2 | -1.2 | -7.7 | 1.0  | FBXW11 | Homo sapiens F-box and WD repeat domain containing 11 (FBXW11), transcript variant 3, mRNA [NM_012300] | 23291 |
| A_23_P254648 | 8.1  | 10.0 | 7.8  | 1.0  | FBXW2  | Homo sapiens F-box and WD repeat domain containing 2 (FBXW2), mRNA [NM_012164]                         | 26190 |

|              |      |      |      |      |       |                                                                                                      |       |
|--------------|------|------|------|------|-------|------------------------------------------------------------------------------------------------------|-------|
| A_23_P104295 | -1.1 | -2.4 | -2.6 | 1.3  | FBXW4 | Homo sapiens F-box and WD repeat domain containing 4 (FBXW4), mRNA [NM_022039]                       | 6468  |
| A_24_P174613 | -1.6 | -1.5 | -2.4 | -1.7 | FBXW7 | Homo sapiens F-box and WD repeat domain containing 7 (FBXW7), transcript variant 1, mRNA [NM_033632] | 55294 |
| A_24_P44279  | 1.7  | 4.1  | 2.5  | 1.6  | FBXW8 | Homo sapiens F-box and WD repeat domain containing 8 (FBXW8), transcript variant 1, mRNA [NM_153348] | 26259 |

|              |       |      |      |      |       |                                                                                                      |       |
|--------------|-------|------|------|------|-------|------------------------------------------------------------------------------------------------------|-------|
| A_23_P48266  | -4.8  | 2.1  | 3.5  | 1.5  | FBXW8 | Homo sapiens F-box and WD repeat domain containing 8 (FBXW8), transcript variant 1, mRNA [NM_153348] | 26259 |
| A_23_P201510 | 2.3   | 5.3  | 4.1  | -3.8 | FCAMR | Homo sapiens Fc receptor, IgA, IgM, high affinity (FCAMR), transcript variant 3, mRNA [NM_001170631] | 83953 |
| A_23_P160902 | -12.1 | -1.1 | -1.2 | -1.1 | FCAMR | Homo sapiens Fc receptor, IgA, IgM, high affinity (FCAMR), transcript variant 3, mRNA [NM_001170631] | 83953 |

|              |      |      |      |      |        |                                                                                                                     |      |
|--------------|------|------|------|------|--------|---------------------------------------------------------------------------------------------------------------------|------|
| A_23_P208768 | -3.2 | -1.0 | -1.1 | -1.0 | FCAR   | Homo sapiens Fc fragment of IgA, receptor for (FCAR), transcript variant 1, mRNA [NM_002000]                        | 2204 |
| A_23_P85716  | 1.4  | -1.2 | -2.0 | -2.6 | FCGR2A | Homo sapiens Fc fragment of IgG, low affinity IIa, receptor (CD32) (FCGR2A), transcript variant 2, mRNA [NM_021642] | 2212 |
| A_23_P34644  | -1.1 | -2.2 | -3.2 | -4.8 | FCGR2B | Homo sapiens Fc fragment of IgG, low affinity IIb, receptor (CD32) (FCGR2B), transcript variant 1, mRNA [NM_004001] | 2213 |

|              |       |       |       |      |        |                                                                                                               |       |
|--------------|-------|-------|-------|------|--------|---------------------------------------------------------------------------------------------------------------|-------|
| A_23_P55936  | 4.3   | 10.5  | 2.4   | 9.5  | FCGRT  | Homo sapiens Fc fragment of IgG, receptor, transporter, alpha (FCGRT), transcript variant 2, mRNA [NM_004107] | 2217  |
| A_32_P459533 | -11.2 | -11.6 | -12.2 | -9.5 | FCHO1  | Homo sapiens FCH domain only 1 (FCHO1), transcript variant 2, mRNA [NM_015122]                                | 23149 |
| A_23_P343826 | 1.6   | 2.5   | 1.5   | 2.0  | FCHSD1 | Homo sapiens FCH and double SH3 domains 1 (FCHSD1), mRNA [NM_033449]                                          | 89848 |
| A_23_P157879 | -7.0  | -1.5  | -1.4  | -2.3 | FCN1   | Homo sapiens ficolin (collagen/fibrinogen domain containing) 1 (FCN1), mRNA [NM_002003]                       | 2219  |



|              |      |      |      |       |       |                                                                                                                                |        |
|--------------|------|------|------|-------|-------|--------------------------------------------------------------------------------------------------------------------------------|--------|
| A_23_P115246 | -5.1 | 1.3  | 1.9  | -2.3  | FCN3  | Homo sapiens ficolin (collagen/fibrinogen domain containing) 3 (Hakata antigen) (FCN3), transcript variant 1, mRNA [NM_003665] | 8547   |
| A_24_P319647 | 2.3  | 3.0  | 2.8  | 1.0   | FCRL2 | Homo sapiens Fc receptor-like 2 (FCRL2), mRNA [NM_030764]                                                                      | 79368  |
| A_23_P358438 | -3.3 | -1.1 | -1.4 | -1.1  | FCRL3 | Homo sapiens Fc receptor-like 3 (FCRL3), mRNA [NM_052939]                                                                      | 115352 |
| A_23_P115201 | 1.1  | 1.1  | -1.0 | -10.0 | FCRL4 | Homo sapiens Fc receptor-like 4 (FCRL4), mRNA [NM_031282]                                                                      | 83417  |

|              |      |      |      |      |         |                                                                                                                         |        |
|--------------|------|------|------|------|---------|-------------------------------------------------------------------------------------------------------------------------|--------|
| A_24_P285158 | 7.5  | 8.9  | -1.1 | 5.3  | FCRLB   | Fc receptor-like B<br>[Source:HGNC<br>Symbol;Accession:26431]<br>[ENST00000495397]                                      | 127943 |
| A_23_P350574 | 20.7 | 19.5 | 18.9 | 19.2 | FCRLB   | Homo sapiens Fc receptor-like B (FCRLB), mRNA<br>[NM_001002901]                                                         | 127943 |
| A_24_P246293 | -9.1 | 1.0  | -1.0 | 1.0  | FDXACB1 | Homo sapiens ferredoxin-fold anticodon binding domain containing 1 (FDXACB1), transcript variant 1, mRNA<br>[NM_138378] | 91893  |

|              |      |      |      |      |       |                                                                                                                            |       |
|--------------|------|------|------|------|-------|----------------------------------------------------------------------------------------------------------------------------|-------|
| A_32_P151933 | 1.1  | -4.0 | 1.0  | 1.1  | FECH  | Homo sapiens ferrochelatase (FECH), nuclear gene encoding mitochondrial protein, transcript variant 1, mRNA [NM_001012515] | 2235  |
| A_23_P151970 | -2.2 | 1.6  | -3.1 | -2.0 | FEM1B | Homo sapiens fem-1 homolog b (C. elegans) (FEM1B), mRNA [NM_015322]                                                        | 10116 |
| A_24_P84898  | -5.4 | -1.0 | -1.0 | 1.2  | FEN1  | Homo sapiens flap structure-specific endonuclease 1 (FEN1), mRNA [NM_004111]                                               | 2237  |

|              |      |      |      |     |            |                                                                                                                                              |        |
|--------------|------|------|------|-----|------------|----------------------------------------------------------------------------------------------------------------------------------------------|--------|
| A_32_P104053 | -1.0 | -1.1 | -3.4 | 1.1 | FER        | fer<br>(fps/fes<br>related)<br>tyrosine<br>kinase<br>[Source:H<br>GNC<br>Symbol;Ac<br>c:3655]<br>[ENST0000<br>0281092]                       | 2241   |
| A_23_P80048  | 2.5  | 1.4  | 1.5  | 1.4 | FER1L4     | Homo<br>sapiens fer-<br>1-like 4 (C.<br>elegans)<br>pseudoge<br>ne<br>(FER1L4),<br>non-<br>coding<br>RNA<br>[NR_0243<br>77]                  | 80307  |
| A_32_P366349 | -5.7 | 3.0  | 2.7  | 1.7 | FER1L5     | Homo<br>sapiens fer-<br>1-like 5 (C.<br>elegans)<br>(FER1L5),<br>mRNA<br>[NM_0011<br>13382]                                                  | 90342  |
| A_23_P322013 | 2.3  | 2.0  | 2.6  | 1.8 | FER1L6-AS1 | Homo<br>sapiens<br>FER1L6<br>antisense<br>RNA 1<br>(non-<br>protein<br>coding)<br>(FER1L6-<br>AS1), non-<br>coding<br>RNA<br>[NR_0400<br>44] | 439941 |

|              |      |     |      |      |        |                                                                                             |        |
|--------------|------|-----|------|------|--------|---------------------------------------------------------------------------------------------|--------|
| A_23_P422849 | 5.2  | 5.0 | 4.2  | 4.1  | FERD3L | Homo sapiens Fer3-like (Drosophila) (FERD3L), mRNA [NM_152898]                              | 222894 |
| A_24_P365506 | -5.0 | 1.2 | -2.3 | 1.1  | FERMT1 | Homo sapiens fermitin family member 1 (FERMT1), mRNA [NM_017671]                            | 55612  |
| A_23_P64044  | 1.8  | 1.6 | 1.4  | 2.2  | FERMT3 | Homo sapiens fermitin family member 3 (FERMT3), transcript variant URP2LF, mRNA [NM_178443] | 83706  |
| A_24_P405631 | 1.2  | 2.3 | -1.4 | -1.5 | FEZF2  | Homo sapiens FEZ family zinc finger 2 (FEZF2), mRNA [NM_018008]                             | 55079  |
| A_23_P39356  | 2.5  | 1.7 | 2.5  | 1.8  | FFAR1  | Homo sapiens free fatty acid receptor 1 (FFAR1), mRNA [NM_005303]                           | 2864   |

|              |     |      |      |     |       |                                                                                       |      |
|--------------|-----|------|------|-----|-------|---------------------------------------------------------------------------------------|------|
| A_23_P397391 | 2.3 | -1.1 | -1.8 | 1.3 | FFAR2 | Homo sapiens free fatty acid receptor 2 (FFAR2), mRNA [NM_005306]                     | 2867 |
| A_23_P56239  | 9.4 | 7.3  | 8.3  | 3.5 | FFAR3 | Homo sapiens free fatty acid receptor 3 (FFAR3), mRNA [NM_005304]                     | 2865 |
| A_24_P282251 | 4.1 | 4.1  | 2.4  | 3.1 | FGA   | Homo sapiens fibrinogen alpha chain (FGA), transcript variant alpha, mRNA [NM_021871] | 2243 |
| A_24_P143138 | 3.5 | 2.5  | 1.9  | 2.5 | FGD1  | Homo sapiens FYVE, RhoGEF and PH domain containing 1 (FGD1), mRNA [NM_004463]         | 2245 |

|              |      |      |      |      |       |                                                                                                     |        |
|--------------|------|------|------|------|-------|-----------------------------------------------------------------------------------------------------|--------|
| A_23_P73559  | -1.4 | -2.9 | 1.0  | -1.9 | FGD1  | Homo sapiens FYVE, RhoGEF and PH domain containing 1 (FGD1), mRNA [NM_004463]                       | 2245   |
| A_24_P140788 | -2.5 | -1.0 | -1.0 | 1.0  | FGD2  | Homo sapiens FYVE, RhoGEF and PH domain containing 2 (FGD2), mRNA [NM_173558]                       | 221472 |
| A_23_P134980 | 3.8  | 1.5  | 1.1  | 2.5  | FGD3  | Homo sapiens FYVE, RhoGEF and PH domain containing 3 (FGD3), transcript variant 2, mRNA [NM_033086] | 89846  |
| A_32_P11579  | -1.1 | -1.1 | -2.9 | -2.8 | FGF12 | Homo sapiens fibroblast growth factor 12 (FGF12), transcript variant 1, mRNA [NM_021032]            | 2257   |

|              |      |      |      |      |       |                                                                                             |       |
|--------------|------|------|------|------|-------|---------------------------------------------------------------------------------------------|-------|
| A_24_P85009  | -2.4 | -2.0 | -1.9 | -2.8 | FGF13 | Homo sapiens fibroblast growth factor 13 (FGF13), transcript variant 4, mRNA [NM_001139498] | 2258  |
| A_23_P88033  | 6.6  | 6.5  | 6.5  | 7.3  | FGF14 | Homo sapiens fibroblast growth factor 14 (FGF14), transcript variant 2, mRNA [NM_175929]    | 2259  |
| A_23_P254896 | -1.2 | -1.2 | -3.3 | -2.3 | FGF16 | Homo sapiens fibroblast growth factor 16 (FGF16), mRNA [NM_003868]                          | 8823  |
| A_23_P101564 | -1.0 | -1.3 | 1.5  | -3.2 | FGF21 | Homo sapiens fibroblast growth factor 21 (FGF21), mRNA [NM_019113]                          | 26291 |



|              |      |      |      |      |      |                                                                                                           |      |
|--------------|------|------|------|------|------|-----------------------------------------------------------------------------------------------------------|------|
| A_24_P337239 | 2.3  | 2.3  | -1.2 | -1.4 | FGF5 | Homo sapiens fibroblast growth factor 5 (FGF5), transcript variant 1, mRNA [NM_004464]                    | 2250 |
| A_23_P212800 | -3.4 | 1.1  | -1.3 | 1.1  | FGF5 | Homo sapiens fibroblast growth factor 5 (FGF5), transcript variant 1, mRNA [NM_004464]                    | 2250 |
| A_23_P105705 | -1.0 | -1.1 | -1.4 | -2.3 | FGF6 | Homo sapiens fibroblast growth factor 6 (FGF6), mRNA [NM_020996]                                          | 2251 |
| A_23_P46829  | 2.3  | 2.2  | 2.2  | 2.5  | FGF8 | Homo sapiens fibroblast growth factor 8 (androgen-induced) (FGF8), transcript variant F, mRNA [NM_033163] | 2253 |

|              |       |      |      |      |        |                                                                                                      |        |
|--------------|-------|------|------|------|--------|------------------------------------------------------------------------------------------------------|--------|
| A_24_P201381 | -1.7  | -1.8 | -4.6 | -5.3 | FGFBP3 | Homo sapiens fibroblast growth factor binding protein 3 (FGFBP3), mRNA [NM_152429]                   | 143282 |
| A_23_P219105 | 1.1   | 1.1  | 1.0  | -4.5 | FGFR1  | Homo sapiens fibroblast growth factor receptor 1 (FGFR1), transcript variant 11, mRNA [NM_001174064] | 2260   |
| A_23_P372923 | 1.0   | 1.7  | -3.9 | 1.0  | FGFR1  | Homo sapiens fibroblast growth factor receptor 1 (FGFR1), transcript variant 13, mRNA [NM_001174066] | 2260   |
| A_23_P315131 | -19.0 | -1.1 | -1.1 | -1.1 | FGFR1  | Homo sapiens cDNA FLJ14326 fis, clone PLACE4000247. [AK024388]                                       | 2260   |

|              |      |      |      |      |       |                                                                                                  |      |
|--------------|------|------|------|------|-------|--------------------------------------------------------------------------------------------------|------|
| A_23_P202334 | -2.1 | -1.7 | -1.4 | -7.8 | FGFR2 | Homo sapiens fibroblast growth factor receptor 2 (FGFR2), transcript variant 2, mRNA [NM_022970] | 2263 |
| A_23_P303149 | -2.6 | -1.1 | -2.3 | -3.1 | FGFR2 | Homo sapiens fibroblast growth factor receptor 2 (FGFR2), transcript variant 1, mRNA [NM_000141] | 2263 |
| A_24_P206624 | 3.3  | -1.2 | 2.7  | 2.7  | FGFR2 | Homo sapiens fibroblast growth factor receptor 2 (FGFR2), transcript variant 2, mRNA [NM_022970] | 2263 |
| A_23_P500501 | 1.0  | 1.0  | -1.1 | -8.8 | FGFR3 | Homo sapiens fibroblast growth factor receptor 3 (FGFR3), transcript variant 1, mRNA [NM_000142] | 2261 |

|              |      |      |     |      |        |                                                                                                           |       |
|--------------|------|------|-----|------|--------|-----------------------------------------------------------------------------------------------------------|-------|
| A_23_P92349  | 1.7  | -3.2 | 1.6 | 1.8  | FGFRL1 | Homo sapiens fibroblast growth factor receptor-like 1 (FGFRL1), transcript variant 1, mRNA [NM_001004356] | 53834 |
| A_23_P148088 | -2.8 | 2.2  | 1.0 | 1.2  | FGG    | Homo sapiens fibrinogen gamma chain (FGG), transcript variant gamma-A, mRNA [NM_000509]                   | 2266  |
| A_23_P42969  | 1.7  | -2.2 | 2.2 | -1.2 | FGL2   | Homo sapiens fibrinogen-like 2 (FGL2), mRNA [NM_006682]                                                   | 10875 |

|              |     |      |      |      |       |                                                                                                                             |        |
|--------------|-----|------|------|------|-------|-----------------------------------------------------------------------------------------------------------------------------|--------|
| A_24_P316634 | 1.0 | 1.0  | 1.0  | -2.5 | FGR   | Homo sapiens Gardner-Rasheed feline sarcoma viral (v-fgr) oncogene homolog (FGR), transcript variant 2, mRNA [NM_001042747] | 2268   |
| A_24_P391840 | 1.1 | -1.2 | -1.0 | -3.3 | FHAD1 | Homo sapiens mRNA for KIAA1937 protein, partial cds. [AB067524]                                                             | 114827 |
| A_32_P61495  | 1.0 | -1.0 | -1.6 | -2.6 | FHAD1 | Homo sapiens forkhead-associated (FHA) phosphopeptide binding domain 1 (FHAD1), mRNA [NM_052929]                            | 114827 |

|              |       |      |      |      |      |                                                                                           |      |
|--------------|-------|------|------|------|------|-------------------------------------------------------------------------------------------|------|
| A_23_P125171 | 1.1   | -2.1 | 1.2  | -1.1 | FHIT | Homo sapiens fragile histidine triad gene (FHIT), transcript variant 1, mRNA [NM_002012]  | 2272 |
| A_23_P125164 | 4.6   | 1.4  | 1.7  | 1.8  | FHIT | Homo sapiens fragile histidine triad gene (FHIT), transcript variant 1, mRNA [NM_002012]  | 2272 |
| A_23_P217326 | -18.7 | -1.4 | -1.4 | -5.5 | FHL1 | Homo sapiens four and a half LIM domains 1 (FHL1), transcript variant 2, mRNA [NM_001449] | 2273 |
| A_23_P42358  | -2.7  | -1.7 | -1.9 | -1.9 | FHL5 | Homo sapiens four and a half LIM domains 5 (FHL5), transcript variant 1, mRNA [NM_020482] | 9457 |

|             |      |      |      |      |       |                                                                                                                             |       |
|-------------|------|------|------|------|-------|-----------------------------------------------------------------------------------------------------------------------------|-------|
| A_23_P37778 | 2.5  | 2.7  | 2.4  | 1.4  | FHOD1 | Homo sapiens formin homology 2 domain containing 1 (FHOD1), mRNA [NM_013241]                                                | 29109 |
| A_32_P34444 | -1.0 | -8.9 | -1.2 | -1.1 | FHOD3 | Homo sapiens formin homology 2 domain containing 3 (FHOD3), mRNA [NM_025135]                                                | 80206 |
| A_23_P1615  | 1.0  | -2.0 | -2.2 | 1.3  | FIBP  | Homo sapiens fibroblast growth factor (acidic) intracellular binding protein (FIBP), transcript variant 2, mRNA [NM_004214] | 9158  |

|              |      |      |      |      |        |                                                                                                              |       |
|--------------|------|------|------|------|--------|--------------------------------------------------------------------------------------------------------------|-------|
| A_23_P145541 | 1.0  | -1.0 | -1.0 | -4.4 | FIG4   | Homo sapiens FIG4 homolog, SAC1 lipid phosphatase domain containing (S. cerevisiae) (FIG4), mRNA [NM_014845] | 9896  |
| A_32_P34003  | -4.9 | 1.0  | 1.3  | 1.1  | FIGN   | fidgetin [Source:HGNC Symbol;Acc:13285] [ENST00000333129]                                                    | 55137 |
| A_23_P165909 | -1.1 | -3.0 | -2.6 | -3.3 | FIGN   | Homo sapiens fidgetin (FIGN), mRNA [NM_018086]                                                               | 55137 |
| A_23_P410233 | -2.0 | 1.0  | -1.1 | -1.1 | FILIP1 | Homo sapiens mRNA; cDNA DKFZp451B134 (from clone DKFZp451B134); complete cds. [AL832009]                     | 27145 |



|              |      |      |      |      |         |                                                                                                                                                     |       |
|--------------|------|------|------|------|---------|-----------------------------------------------------------------------------------------------------------------------------------------------------|-------|
| A_23_P436369 | -1.3 | -9.2 | -1.3 | -1.3 | FILIP1  | Homo sapiens filamin A interacting protein 1 (FILIP1), mRNA [NM_015687]                                                                             | 27145 |
| A_23_P252052 | 2.0  | 10.6 | 14.0 | 2.2  | FILIP1L | Homo sapiens filamin A interacting protein 1-like (FILIP1L), transcript variant 1, mRNA [NM_182909]                                                 | 11259 |
| A_23_P20183  | 1.0  | 1.0  | -5.5 | 1.1  | FIS1    | Homo sapiens fission 1 (mitochondrial outer membrane) homolog (S. cerevisiae) (FIS1), nuclear gene encoding mitochondrial protein, mRNA [NM_016068] | 51024 |

|              |       |      |      |      |        |                                                                                                  |        |
|--------------|-------|------|------|------|--------|--------------------------------------------------------------------------------------------------|--------|
| A_24_P203407 | -28.0 | -1.4 | 1.2  | -1.2 | FITM2  | Homo sapiens fat storage-inducing transmembrane protein 2 (FITM2), mRNA [NM_001080472]           | 128486 |
| A_23_P154667 | -2.0  | -1.2 | -1.1 | -1.2 | FKBP1A | Homo sapiens FK506 binding protein 1A, 12kDa (FKBP1A), transcript variant 1, mRNA [NM_000801]    | 2280   |
| A_23_P142631 | 3.8   | 2.5  | 4.3  | 3.2  | FKBP1B | Homo sapiens FK506 binding protein 1B, 12.6 kDa (FKBP1B), transcript variant 2, mRNA [NM_054033] | 2281   |
| A_24_P38081  | -1.7  | -1.0 | -2.3 | -1.0 | FKBP5  | Homo sapiens FK506 binding protein 5 (FKBP5), transcript variant 1, mRNA [NM_004117]             | 2289   |

|              |      |     |      |     |       |                                                                                      |       |
|--------------|------|-----|------|-----|-------|--------------------------------------------------------------------------------------|-------|
| A_23_P79622  | 1.1  | 1.1 | -2.9 | 1.0 | FKBP7 | Homo sapiens FK506 binding protein 7 (FKBP7), transcript variant 1, mRNA [NM_181342] | 51661 |
| A_23_P376211 | 2.1  | 2.2 | 2.1  | 1.4 | FKBP9 | Homo sapiens FK506 binding protein 9, 63 kDa (FKBP9), mRNA [NM_007270]               | 11328 |
| A_23_P70566  | 1.8  | 4.5 | 4.1  | 4.1 | FKBPL | Homo sapiens FK506 binding protein like (FKBPL), mRNA [NM_022110]                    | 63943 |
| A_23_P255827 | -5.9 | 1.0 | -1.0 | 1.7 | FKSG2 | Homo sapiens apoptosis inhibitor (FKSG2) mRNA, complete cds. [AF300871]              | 59347 |

|              |     |      |      |     |        |                                                                                                                                  |        |
|--------------|-----|------|------|-----|--------|----------------------------------------------------------------------------------------------------------------------------------|--------|
| A_23_P33927  | 1.1 | 1.2  | -7.4 | 1.1 | FKSG43 | Homo sapiens FERM domain-containing protein 8 pseudogene (FKSG43), non-coding RNA [NR_033742]                                    | 83957  |
| A_23_P300087 | 2.4 | 2.8  | 4.2  | 1.8 | FKSG83 | Homo sapiens FKSG83 (FKSG83), mRNA [NM_032030]                                                                                   | 83954  |
| A_23_P34527  | 2.1 | -1.4 | 1.2  | 1.4 | FLAD1  | Homo sapiens FAD1 flavin adenine dinucleotide synthetase homolog (S. cerevisiae) (FLAD1), transcript variant 1, mRNA [NM_025207] | 80308  |
| A_23_P311410 | 1.0 | -1.0 | -9.2 | 1.0 | FLCN   | folliculin [Source:HGNC Symbol;Acc:27310] [ENST00000466317]                                                                      | 201163 |

|              |      |      |      |     |       |                                                                              |       |
|--------------|------|------|------|-----|-------|------------------------------------------------------------------------------|-------|
| A_24_P51322  | 2.0  | 2.0  | 2.5  | 2.4 | FLG   | Homo sapiens filaggrin (FLG), mRNA [NM_002016]                               | 2312  |
| A_23_P96568  | 2.6  | -7.7 | 2.2  | 1.9 | FLNA  | Homo sapiens filamin A, alpha (FLNA), transcript variant 1, mRNA [NM_001456] | 2316  |
| A_24_P683917 | 1.0  | 2.9  | -1.1 | 1.0 | FLNB  | filamin B, beta [Source:HGNC Symbol;Acc:3755] [ENST00000477629]              | 2317  |
| A_24_P77968  | -1.6 | -1.4 | -1.8 | 2.1 | FLNC  | Homo sapiens filamin C, gamma (FLNC), transcript variant 1, mRNA [NM_001458] | 2318  |
| A_24_P794833 | 3.9  | 7.3  | -1.1 | 3.1 | FLOT1 | flotillin 1 [Source:HGNC Symbol;Acc:3757] [ENST00000474138]                  | 10211 |

|              |      |      |      |      |       |                                                                                           |       |
|--------------|------|------|------|------|-------|-------------------------------------------------------------------------------------------|-------|
| A_23_P55319  | 1.9  | 3.0  | 2.6  | 1.5  | FLOT2 | Homo sapiens flotillin 2 (FLOT2), mRNA [NM_004475]                                        | 2319  |
| A_24_P253818 | -1.0 | -1.1 | -4.5 | -1.0 | FLOT2 | Homo sapiens flotillin 2 (FLOT2), mRNA [NM_004475]                                        | 2319  |
| A_24_P236235 | -2.5 | 1.9  | 1.3  | -1.2 | FLRT2 | Homo sapiens fibronectin leucine rich transmembrane protein 2 (FLRT2), mRNA [NM_013231]   | 23768 |
| A_23_P99442  | 1.1  | 1.0  | 1.0  | -2.8 | FLT3  | Homo sapiens fms-related tyrosine kinase 3 (FLT3), mRNA [NM_004119]                       | 2322  |
| A_23_P213394 | 1.7  | 2.5  | -1.1 | 1.4  | FLT4  | Homo sapiens fms-related tyrosine kinase 4 (FLT4), transcript variant 1, mRNA [NM_182925] | 2324  |

|              |       |      |      |      |         |                                                                                       |        |
|--------------|-------|------|------|------|---------|---------------------------------------------------------------------------------------|--------|
| A_32_P197511 | -1.1  | -1.9 | -3.3 | -1.2 | FLYWCH2 | Homo sapiens FLYWCH family member 2 (FLYWCH2), transcript variant 1, mRNA [NM_138439] | 114984 |
| A_32_P180825 | -12.4 | -1.0 | -1.3 | -1.0 | FMN1    | Homo sapiens formin 1 (FMN1), mRNA [NM_001103184]                                     | 342184 |
| A_32_P229132 | -3.1  | 1.2  | 1.1  | 1.1  | FMN2    | Homo sapiens formin 2 (FMN2), mRNA [NM_020066]                                        | 56776  |
| A_24_P390668 | 1.2   | -2.2 | -1.3 | -1.7 | FMNL1   | Homo sapiens formin-like 1 (FMNL1), mRNA [NM_005892]                                  | 752    |
| A_32_P193080 | 1.3   | 2.2  | 1.8  | -1.2 | FMNL2   | Homo sapiens formin-like 2 (FMNL2), mRNA [NM_052905]                                  | 114793 |

|              |      |      |      |      |       |                                                                                                  |       |
|--------------|------|------|------|------|-------|--------------------------------------------------------------------------------------------------|-------|
| A_23_P379200 | 3.5  | 3.4  | 1.0  | 3.5  | FMNL3 | Homo sapiens formin-like 3 (FMNL3), transcript variant 1, mRNA [NM_175736]                       | 91010 |
| A_24_P692566 | 2.4  | 1.0  | -1.2 | 2.2  | FMO1  | flavin containing monooxygenase 1 [Source:HGNC Symbol;Acc:3769] [ENST00000469112]                | 2326  |
| A_23_P155601 | -4.3 | 1.3  | -1.5 | 1.3  | FMO3  | Homo sapiens flavin containing monooxygenase 3 (FMO3), transcript variant 2, mRNA [NM_001002294] | 2328  |
| A_23_P89215  | -1.3 | -2.1 | 1.3  | -1.8 | FN3K  | Homo sapiens fructosamine 3 kinase (FN3K), mRNA [NM_022158]                                      | 64122 |



|              |      |      |      |      |        |                                                                                                         |        |
|--------------|------|------|------|------|--------|---------------------------------------------------------------------------------------------------------|--------|
| A_24_P205130 | -1.3 | 1.1  | -1.1 | -9.5 | FNBP1  | Homo sapiens formin binding protein 1 (FNBP1), mRNA [NM_015033]                                         | 23048  |
| A_23_P253434 | -4.2 | 1.4  | -1.1 | -1.0 | FNDC3B | Homo sapiens fibronectin type III domain containing 3B (FNDC3B), transcript variant 1, mRNA [NM_022763] | 64778  |
| A_23_P66552  | -5.9 | 1.0  | 1.0  | 1.0  | FNDC8  | Homo sapiens fibronectin type III domain containing 8 (FNDC8), mRNA [NM_017559]                         | 54752  |
| A_23_P306489 | -1.1 | -1.4 | -2.2 | -1.6 | FNDC9  | Homo sapiens fibronectin type III domain containing 9 (FNDC9), mRNA [NM_001001343]                      | 408263 |

|              |      |      |     |     |       |                                                                                                  |       |
|--------------|------|------|-----|-----|-------|--------------------------------------------------------------------------------------------------|-------|
| A_24_P222300 | 1.4  | 3.5  | 1.3 | 1.9 | FNIP1 | Homo sapiens folliculin interacting protein 1 (FNIP1), transcript variant 1, mRNA [NM_133372]    | 96459 |
| A_32_P190737 | -1.0 | 1.7  | 1.8 | 3.5 | FNIP2 | folliculin interacting protein 2 [Source:HGNC Symbol;Acc:29280] [ENST0000264433]                 | 57600 |
| A_24_P830025 | 1.4  | -2.9 | 1.4 | 1.3 | FNTA  | farnesyltransferase, CAAX box, alpha [Source:HGNC Symbol;Acc:3782] [ENST00000525099]             | 2339  |
| A_23_P24926  | -5.2 | 1.2  | 2.4 | 1.1 | FNTA  | Homo sapiens farnesyltransferase, CAAX box, alpha (FNTA), transcript variant 1, mRNA [NM_002027] | 2339  |

|             |      |      |      |      |       |                                                                                                                      |      |
|-------------|------|------|------|------|-------|----------------------------------------------------------------------------------------------------------------------|------|
| A_23_P25835 | 8.5  | 13.6 | 5.1  | 15.2 | FNTB  | Homo sapiens farnesyltransferase, CAAX box, beta (FNTB), mRNA [NM_002028]                                            | 2342 |
| A_23_P47616 | -1.2 | -2.2 | -1.4 | -1.5 | FOLH1 | Homo sapiens folate hydrolase (prostate-specific membrane antigen) 1 (FOLH1), transcript variant 1, mRNA [NM_004476] | 2346 |
| A_23_P53176 | 1.9  | 1.9  | 2.4  | 1.2  | FOLR1 | Homo sapiens folate receptor 1 (adult) (FOLR1), transcript variant 1, mRNA [NM_016725]                               | 2348 |
| A_24_P32935 | 2.2  | 2.0  | 3.0  | 1.1  | FOLR2 | Homo sapiens folate receptor 2 (fetal) (FOLR2), transcript variant 1, mRNA [NM_000803]                               | 2350 |

|              |      |      |     |      |       |                                                                                     |        |
|--------------|------|------|-----|------|-------|-------------------------------------------------------------------------------------|--------|
| A_24_P206702 | 2.1  | 1.2  | 1.5 | 1.8  | FOLR4 | Homo sapiens folate receptor 4 (delta) homolog (mouse) (FOLR4), mRNA [NM_001199206] | 390243 |
| A_24_P247587 | 1.2  | -2.7 | 1.2 | -2.3 | FONG  | Homo sapiens uncharacterized LOC348751 (FONG), non-coding RNA [NR_034096]           | 348751 |
| A_23_P161624 | 1.0  | 1.1  | 1.5 | -2.6 | FOSL1 | Homo sapiens FOS-like antigen 1 (FOSL1), mRNA [NM_005438]                           | 8061   |
| A_24_P365523 | -2.2 | -1.9 | 1.2 | -1.5 | FOXA2 | Homo sapiens forkhead box A2 (FOXA2), transcript variant 1, mRNA [NM_021784]        | 3170   |
| A_23_P142174 | 1.4  | -1.2 | 1.9 | 2.0  | FOXA3 | Homo sapiens forkhead box A3 (FOXA3), mRNA [NM_004497]                              | 3171   |

|              |      |      |      |      |       |                                                                                       |       |
|--------------|------|------|------|------|-------|---------------------------------------------------------------------------------------|-------|
| A_23_P140527 | -2.9 | -2.3 | -1.1 | -1.4 | FOXB1 | Homo sapiens forkhead box B1 (FOXB1), mRNA [NM_012182]                                | 27023 |
| A_32_P205110 | 1.1  | -4.7 | 2.4  | -1.0 | FOXC1 | Homo sapiens forkhead box C1 (FOXC1), mRNA [NM_001453]                                | 2296  |
| A_24_P82358  | 3.9  | 4.1  | 3.8  | 5.2  | FOXC2 | Homo sapiens forkhead box C2 (MFH-1, mesenchyme forkhead 1) (FOXC2), mRNA [NM_005251] | 2303  |
| A_23_P86171  | -2.2 | 1.2  | -1.1 | -1.1 | FOXD2 | Homo sapiens forkhead box D2 (FOXD2), mRNA [NM_004474]                                | 2306  |
| A_23_P413585 | 1.6  | -1.4 | -2.5 | 1.1  | FOXD2 | Homo sapiens forkhead box D2 (FOXD2), mRNA [NM_004474]                                | 2306  |

|              |      |      |      |      |       |                                                                                         |      |
|--------------|------|------|------|------|-------|-----------------------------------------------------------------------------------------|------|
| A_32_P119248 | -7.2 | -1.2 | -1.3 | -1.2 | FOXD4 | Homo sapiens forkhead box D4 (FOXD4), mRNA [NM_207305]                                  | 2298 |
| A_23_P358370 | -3.8 | 1.3  | -1.9 | -2.4 | FOXE1 | H.sapiens HFKH4 mRNA for fork head like protein. [X94553]                               | 2304 |
| A_23_P216664 | 1.6  | 1.9  | 3.4  | 1.3  | FOXE1 | Homo sapiens forkhead box E1 (thyroid transcription factor 2) (FOXE1), mRNA [NM_004473] | 2304 |
| A_23_P112666 | 7.4  | 11.9 | 4.6  | 9.7  | FOXE3 | Homo sapiens forkhead box E3 (FOXE3), mRNA [NM_012186]                                  | 2301 |
| A_23_P82959  | 2.9  | 3.2  | -1.4 | -1.6 | FOXH1 | Homo sapiens forkhead box H1 (FOXH1), mRNA [NM_003923]                                  | 8928 |

|              |      |      |      |      |       |                                                        |       |
|--------------|------|------|------|------|-------|--------------------------------------------------------|-------|
| A_24_P168033 | 1.3  | -1.8 | 1.7  | -2.1 | FOXJ1 | Homo sapiens forkhead box J1 (FOXJ1), mRNA [NM_001454] | 2302  |
| A_23_P204238 | -1.0 | -4.9 | -1.0 | 1.0  | FOXJ2 | Homo sapiens forkhead box J2 (FOXJ2), mRNA [NM_018416] | 55810 |
| A_24_P416301 | 1.1  | -7.4 | -1.2 | -2.1 | FOXK2 | Homo sapiens forkhead box K2 (FOXK2), mRNA [NM_004514] | 3607  |
| A_23_P365081 | -8.5 | 1.5  | 2.1  | -1.1 | FOXL1 | Homo sapiens forkhead box L1 (FOXL1), mRNA [NM_005250] | 2300  |
| A_32_P140898 | -1.0 | 1.1  | -1.1 | -3.4 | FOXN2 | Homo sapiens forkhead box N2 (FOXN2), mRNA [NM_002158] | 3344  |
| A_23_P151426 | 3.2  | 3.4  | 2.7  | 1.3  | FOXO1 | Homo sapiens forkhead box O1 (FOXO1), mRNA [NM_002015] | 2308  |

|              |       |      |      |      |       |                                                                              |       |
|--------------|-------|------|------|------|-------|------------------------------------------------------------------------------|-------|
| A_23_P345575 | 2.7   | 3.7  | 1.5  | 3.0  | FOXO3 | Homo sapiens forkhead box O3 (FOXO3), transcript variant 1, mRNA [NM_001455] | 2309  |
| A_32_P102062 | 1.6   | 2.1  | 2.1  | 1.0  | FOXO3 | Homo sapiens forkhead box O3 (FOXO3), transcript variant 1, mRNA [NM_001455] | 2309  |
| A_23_P217487 | -5.1  | 1.1  | 1.2  | -1.5 | FOXO4 | Homo sapiens forkhead box O4 (FOXO4), transcript variant 1, mRNA [NM_005938] | 4303  |
| A_24_P38316  | -31.2 | -1.2 | -1.1 | -1.0 | FOXP2 | Homo sapiens forkhead box P2 (FOXP2), transcript variant 2, mRNA [NM_148898] | 93986 |



|              |      |      |      |      |         |                                                                                                                 |        |
|--------------|------|------|------|------|---------|-----------------------------------------------------------------------------------------------------------------|--------|
| A_23_P258703 | -2.0 | 1.2  | -2.0 | -1.3 | FOXP4   | Homo sapiens forkhead box P4 (FOXP4), transcript variant 1, mRNA [NM_001012426]                                 | 116113 |
| A_24_P204011 | 2.0  | 6.2  | 4.2  | 4.0  | FOXR1   | Homo sapiens forkhead box R1 (FOXR1), mRNA [NM_181721]                                                          | 283150 |
| A_24_P147765 | -1.8 | -1.9 | -1.1 | -2.0 | FOXRED2 | Homo sapiens FAD-dependent oxidoreductase domain containing 2 (FOXRED2), transcript variant 1, mRNA [NM_024955] | 80020  |

|              |      |      |      |      |         |                                                                                                                                       |       |
|--------------|------|------|------|------|---------|---------------------------------------------------------------------------------------------------------------------------------------|-------|
| A_23_P369948 | -3.9 | -1.0 | -1.0 | -1.0 | FOXRED2 | Homo sapiens FAD-dependent oxidoreductase domain containing 2 (FOXRED2), transcript variant 1, mRNA [NM_024955]                       | 80020 |
| A_24_P230570 | 1.5  | 1.2  | 1.0  | 6.3  | FOXS1   | Homo sapiens forkhead box S1 (FOXS1), mRNA [NM_004118]                                                                                | 2307  |
| A_23_P9465   | 1.5  | 2.1  | 1.6  | 1.4  | FPGS    | Homo sapiens folic polyglutamate synthase (FPGS), nuclear gene encoding mitochondrial protein, transcript variant 1, mRNA [NM_004957] | 2356  |

|              |     |      |     |     |        |                                                                                                    |       |
|--------------|-----|------|-----|-----|--------|----------------------------------------------------------------------------------------------------|-------|
| A_23_P200030 | 1.2 | -2.3 | 1.2 | 1.1 | FPGT   | Homo sapiens fucose-1-phosphate guanylyltransferase (FPGT), transcript variant 1, mRNA [NM_003838] | 8790  |
| A_32_P107876 | 1.0 | 2.3  | 1.1 | 2.5 | FRAS1  | Homo sapiens Fraser syndrome 1 (FRAS1), transcript variant 1, mRNA [NM_025074]                     | 80144 |
| A_23_P81717  | 2.1 | 1.9  | 1.2 | 1.9 | FRMD1  | Homo sapiens FERM domain containing 1 (FRMD1), transcript variant 1, mRNA [NM_024919]              | 79981 |
| A_24_P374741 | 2.0 | 1.1  | 1.0 | 1.7 | FRMD4A | FERM domain containing 4A [Source:HGNC Symbol;Acc:25491] [ENST0000492155]                          | 55691 |

|              |      |     |      |      |        |                                                                            |       |
|--------------|------|-----|------|------|--------|----------------------------------------------------------------------------|-------|
| A_32_P709988 | 2.1  | 2.0 | -1.0 | 1.9  | FRMD4A | FERM domain containing 4A [Source:HGNC Symbol;Acc:25491] [ENST00000493380] | 55691 |
| A_24_P942321 | 1.0  | 3.1 | -1.1 | -1.1 | FRMD4A | Homo sapiens FERM domain containing 4A (FRMD4A), mRNA [NM_018027]          | 55691 |
| A_24_P43959  | -2.1 | 1.7 | 1.6  | 1.4  | FRMD4A | Homo sapiens FERM domain containing 4A (FRMD4A), mRNA [NM_018027]          | 55691 |
| A_23_P169460 | -7.0 | 1.4 | 1.2  | -1.2 | FRMPD1 | Homo sapiens FERM and PDZ domain containing 1 (FRMPD1), mRNA [NM_014907]   | 22844 |

|              |      |     |      |      |        |                                                                                                   |        |
|--------------|------|-----|------|------|--------|---------------------------------------------------------------------------------------------------|--------|
| A_23_P86710  | 1.7  | 1.7 | -2.2 | 1.6  | FRMPD2 | Homo sapiens FERM and PDZ domain containing 2 (FRMPD2), transcript variant 3, mRNA [NM_001018071] | 143162 |
| A_32_P129669 | 2.3  | 1.6 | 2.6  | 1.4  | FRMPD3 | PREDICTED: Homo sapiens FERM and PDZ domain containing 3 (FRMPD3), mRNA [XM_042978]               | 84443  |
| A_24_P940275 | -3.0 | 1.0 | -1.0 | -1.4 | FRMPD4 | Homo sapiens FERM and PDZ domain containing 4 (FRMPD4), mRNA [NM_014728]                          | 9758   |

|              |      |      |       |      |      |                                                                                                           |        |
|--------------|------|------|-------|------|------|-----------------------------------------------------------------------------------------------------------|--------|
| A_23_P430785 | -1.1 | -1.6 | -2.7  | -1.2 | FRS2 | Homo sapiens fibroblast growth factor receptor substrate 2 (FRS2), transcript variant 1, mRNA [NM_006654] | 10818  |
| A_23_P167970 | 1.5  | 1.6  | -1.8  | -2.2 | FRS3 | Homo sapiens fibroblast growth factor receptor substrate 3 (FRS3), mRNA [NM_006653]                       | 10817  |
| A_24_P68229  | 8.0  | 4.2  | 3.6   | 3.7  | FRYL | Homo sapiens FRY-like (FRYL), mRNA [NM_015030]                                                            | 285527 |
| A_24_P308109 | -1.0 | -1.1 | -16.6 | -1.1 | FRYL | Homo sapiens FRY-like (FRYL), mRNA [NM_015030]                                                            | 285527 |
| A_23_P10902  | 1.0  | 2.2  | 1.2   | -1.0 | FRZB | Homo sapiens frizzled-related protein (FRZB), mRNA [NM_001463]                                            | 2487   |

|              |      |      |      |      |       |                                                                                                                                                |       |
|--------------|------|------|------|------|-------|------------------------------------------------------------------------------------------------------------------------------------------------|-------|
| A_23_P168531 | 1.7  | 1.2  | 2.3  | 1.3  | FSCN1 | Homo sapiens fascin homolog 1, actin-bundling protein (Strongylocentrotus purpuratus) (FSCN1), mRNA [NM_003088]                                | 6624  |
| A_23_P84496  | 2.4  | 1.5  | -1.1 | 1.3  | FSCN2 | Homo sapiens fascin homolog 2, actin-bundling protein, retinal (Strongylocentrotus purpuratus) (FSCN2), transcript variant 1, mRNA [NM_012418] | 25794 |
| A_23_P153651 | -1.7 | -3.4 | -1.5 | -1.2 | FSD1  | Homo sapiens fibronectin type III and SPRY domain containing 1 (FSD1), mRNA [NM_024333]                                                        | 79187 |

|              |      |      |      |      |       |                                                                                                  |        |
|--------------|------|------|------|------|-------|--------------------------------------------------------------------------------------------------|--------|
| A_23_P65901  | 2.1  | 1.0  | 1.2  | 1.0  | FSD2  | Homo sapiens mRNA; cDNA DKFZp451H129 (from clone DKFZp451H129). [AL833295]                       | 123722 |
| A_23_P353125 | -1.5 | -1.7 | -2.9 | 1.2  | FSIP1 | Homo sapiens fibrous sheath interacting protein 1 (FSIP1), mRNA [NM_152597]                      | 161835 |
| A_23_P212696 | 1.7  | 1.1  | 2.1  | -1.5 | FSTL1 | Homo sapiens follistatin-like 1 (FSTL1), mRNA [NM_007085]                                        | 11167  |
| A_23_P91552  | 1.9  | -1.8 | 2.6  | 1.2  | FTCD  | Homo sapiens formimino transferase cyclodeaminase (FTCD), transcript variant A, mRNA [NM_206965] | 10841  |



|              |      |      |      |      |      |                                                                     |      |
|--------------|------|------|------|------|------|---------------------------------------------------------------------|------|
| A_24_P58337  | 2.8  | 1.6  | 2.0  | 3.0  | FTH1 | Homo sapiens ferritin, heavy polypeptide 1 (FTH1), mRNA [NM_002032] | 2495 |
| A_32_P111565 | -1.2 | 1.8  | 1.6  | -3.3 | FTH1 | Homo sapiens ferritin, heavy polypeptide 1 (FTH1), mRNA [NM_002032] | 2495 |
| A_32_P155247 | -1.8 | -1.7 | -2.2 | 2.1  | FTL  | Homo sapiens ferritin, light polypeptide (FTL), mRNA [NM_000146]    | 2512 |
| A_23_P50498  | 1.9  | 2.6  | -1.7 | 1.1  | FTL  | Homo sapiens ferritin, light polypeptide (FTL), mRNA [NM_000146]    | 2512 |

|              |      |      |      |      |       |                                                                                                           |       |
|--------------|------|------|------|------|-------|-----------------------------------------------------------------------------------------------------------|-------|
| A_23_P367596 | 3.6  | -1.4 | 1.4  | 5.4  | FTMT  | Homo sapiens ferritin mitochondrial (FTMT), nuclear gene encoding mitochondrial protein, mRNA [NM_177478] | 94033 |
| A_23_P113184 | -1.1 | -4.8 | -1.1 | -1.6 | FTO   | Homo sapiens fat mass and obesity associated (FTO), mRNA [NM_001080432]                                   | 79068 |
| A_23_P22473  | 2.1  | 1.1  | 1.2  | 1.7  | FTSJ1 | Homo sapiens FtsJ homolog 1 (E. coli) (FTSJ1), transcript variant 1, mRNA [NM_012280]                     | 24140 |
| A_24_P357183 | 3.0  | 3.5  | 1.0  | 1.6  | FTSJ1 | Homo sapiens FtsJ homolog 1 (E. coli) (FTSJ1), transcript variant 3, mRNA [NM_177439]                     | 24140 |

|              |      |      |      |      |        |                                                                                                          |        |
|--------------|------|------|------|------|--------|----------------------------------------------------------------------------------------------------------|--------|
| A_24_P363477 | 1.8  | 1.9  | 2.2  | -2.6 | FTSJ2  | Homo sapiens FtsJ homolog 2 (E. coli) (FTSJ2), mRNA [NM_013393]                                          | 29960  |
| A_23_P55091  | -6.3 | 2.2  | -1.2 | 1.1  | FTSJ3  | Homo sapiens FtsJ homolog 3 (E. coli) (FTSJ3), mRNA [NM_017647]                                          | 117246 |
| A_24_P410378 | -2.0 | 1.0  | 1.0  | -1.0 | FTSJD1 | Homo sapiens FtsJ methyltransferase domain containing 1 (FTSJD1), transcript variant 1, mRNA [NM_018348] | 55783  |
| A_23_P45699  | -2.3 | -1.3 | -2.4 | -1.8 | FUBP1  | Homo sapiens far upstream element (FUSE) binding protein 1 (FUBP1), mRNA [NM_003902]                     | 8880   |

|              |      |      |      |      |        |                                                                                                                                             |        |
|--------------|------|------|------|------|--------|---------------------------------------------------------------------------------------------------------------------------------------------|--------|
| A_23_P435833 | 1.2  | -1.2 | -2.4 | -1.6 | FUBP3  | Homo sapiens far upstream element (FUSE) binding protein 3 (FUBP3), mRNA [NM_003934]                                                        | 8939   |
| A_23_P375549 | -1.3 | -2.0 | -1.4 | -1.2 | FUNDC1 | Homo sapiens FUN14 domain containing 1 (FUNDC1), mRNA [NM_173794]                                                                           | 139341 |
| A_32_P459423 | -1.6 | -1.5 | -3.7 | -2.8 | FUNDC2 | Homo sapiens DC44 mRNA, complete cds. [AF267862]                                                                                            | 65991  |
| A_23_P360316 | 2.4  | -1.0 | -1.1 | -1.0 | FUT3   | Homo sapiens fucosyltransferase 3 (galactoside 3(4)-L-fucosyltransferase, Lewis blood group) (FUT3), transcript variant 1, mRNA [NM_000149] | 2525   |

|              |      |      |      |      |      |                                                                                                               |      |
|--------------|------|------|------|------|------|---------------------------------------------------------------------------------------------------------------|------|
| A_24_P295609 | 1.0  | 1.0  | -5.6 | 1.0  | FUT4 | Homo sapiens fucosyltransferase 4 (alpha (1,3) fucosyltransferase, myeloid-specific) (FUT4), mRNA [NM_002033] | 2526 |
| A_23_P101759 | -1.6 | -1.6 | -1.4 | -2.2 | FUT5 | Homo sapiens fucosyltransferase 5 (alpha (1,3) fucosyltransferase) (FUT5), mRNA [NM_002034]                   | 2527 |
| A_23_P252664 | 1.1  | 1.2  | 1.0  | 2.3  | FUT6 | Human alpha (1,3) fucosyltransferase (FUT6) mRNA, major transcript 1, complete cds. [U27333]                  | 2528 |

|              |     |      |     |     |      |                                                                                                                   |       |
|--------------|-----|------|-----|-----|------|-------------------------------------------------------------------------------------------------------------------|-------|
| A_23_P5092   | 1.8 | -1.0 | 2.5 | 1.2 | FUT6 | Homo sapiens fucosyltransferase 6 (alpha (1,3) fucosyltransferase) (FUT6), transcript variant 1, mRNA [NM_000150] | 2528  |
| A_23_P170534 | 2.2 | 1.7  | 1.0 | 1.2 | FUT7 | Homo sapiens fucosyltransferase 7 (alpha (1,3) fucosyltransferase) (FUT7), mRNA [NM_004479]                       | 2529  |
| A_23_P19556  | 2.6 | 1.4  | 2.3 | 2.2 | FUT9 | Homo sapiens fucosyltransferase 9 (alpha (1,3) fucosyltransferase) (FUT9), mRNA [NM_006581]                       | 10690 |

|              |      |     |      |     |      |                                                                                                       |       |
|--------------|------|-----|------|-----|------|-------------------------------------------------------------------------------------------------------|-------|
| A_24_P914362 | -6.1 | 2.0 | 1.3  | 1.0 | FUT9 | fucosyltransferase 9 (alpha (1,3) fucosyltransferase) [Source:HGNC Symbol;Acc:4020] [ENST00000483933] | 10690 |
| A_24_P121891 | 2.0  | 3.6 | -1.3 | 2.6 | FUZ  | Homo sapiens fuzzy homolog (Drosophila) (FUZ), transcript variant 1, mRNA [NM_025129]                 | 80199 |
| A_23_P4007   | 8.9  | 5.7 | 2.1  | 4.8 | FXR2 | Homo sapiens fragile X mental retardation, autosomal homolog 2 (FXR2), mRNA [NM_004860]               | 9513  |

|              |      |      |      |      |       |                                                                                                               |      |
|--------------|------|------|------|------|-------|---------------------------------------------------------------------------------------------------------------|------|
| A_23_P108216 | 1.4  | -2.2 | -1.3 | -1.6 | FXVD1 | Homo sapiens FXVD domain containing ion transport regulator 1 (FXVD1), transcript variant a, mRNA [NM_005031] | 5348 |
| A_24_P196562 | 2.0  | 2.1  | -1.2 | -1.0 | FXVD2 | Homo sapiens FXVD domain containing ion transport regulator 2 (FXVD2), transcript variant b, mRNA [NM_021603] | 486  |
| A_23_P161769 | -1.0 | -2.7 | -1.2 | -1.1 | FXVD2 | Homo sapiens FXVD domain containing ion transport regulator 2 (FXVD2), transcript variant b, mRNA [NM_021603] | 486  |



|              |       |      |      |      |       |                                                                                                               |       |
|--------------|-------|------|------|------|-------|---------------------------------------------------------------------------------------------------------------|-------|
| A_24_P293192 | -1.0  | 3.6  | 4.3  | 3.2  | FXYD3 | Homo sapiens FXYD domain containing ion transport regulator 3 (FXYD3), transcript variant 1, mRNA [NM_005971] | 5349  |
| A_23_P98121  | -1.6  | -1.8 | -1.9 | -2.2 | FXYD4 | Homo sapiens FXYD domain containing ion transport regulator 4 (FXYD4), transcript variant 1, mRNA [NM_173160] | 53828 |
| A_24_P194081 | -17.7 | -2.0 | -1.3 | -3.4 | FXYD5 | Homo sapiens FXYD domain containing ion transport regulator 5 (FXYD5), transcript variant 1, mRNA [NM_144779] | 53827 |

|              |     |      |      |      |       |                                                                                                               |       |
|--------------|-----|------|------|------|-------|---------------------------------------------------------------------------------------------------------------|-------|
| A_23_P130995 | 1.1 | 1.6  | 1.7  | 2.1  | FXVD5 | Homo sapiens FXVD domain containing ion transport regulator 5 (FXVD5), transcript variant 1, mRNA [NM_144779] | 53827 |
| A_23_P150394 | 2.4 | 1.2  | -1.0 | -1.4 | FXVD6 | Homo sapiens FXVD domain containing ion transport regulator 6 (FXVD6), transcript variant 1, mRNA [NM_022003] | 53826 |
| A_23_P122127 | 2.2 | -1.0 | 2.2  | -1.0 | FYB   | Homo sapiens FYN binding protein (FYB), transcript variant 1, mRNA [NM_001465]                                | 2533  |

|              |      |      |      |       |        |                                                                                                      |       |
|--------------|------|------|------|-------|--------|------------------------------------------------------------------------------------------------------|-------|
| A_24_P393740 | 2.0  | 1.3  | -1.2 | -1.2  | FYB    | Homo sapiens FYN binding protein (FYB), transcript variant 1, mRNA [NM_001465]                       | 2533  |
| A_23_P80827  | -3.1 | 1.4  | 1.2  | -1.0  | FYTTD1 | Homo sapiens forty-two-three domain containing 1 (FYTTD1), transcript variant 2, mRNA [NM_001011537] | 84248 |
| A_24_P38276  | -1.0 | -1.0 | -1.1 | -33.4 | FZD1   | Homo sapiens frizzled family receptor 1 (FZD1), mRNA [NM_003505]                                     | 8321  |
| A_23_P141362 | 1.0  | 1.1  | 1.0  | 2.0   | FZD2   | Homo sapiens frizzled family receptor 2 (FZD2), mRNA [NM_001466]                                     | 2535  |

|              |      |      |      |     |      |                                                                                                                    |       |
|--------------|------|------|------|-----|------|--------------------------------------------------------------------------------------------------------------------|-------|
| A_23_P108437 | -2.3 | 1.3  | 1.4  | 1.2 | FZD5 | Homo sapiens frizzled family receptor 5 (FZD5), mRNA [NM_003468]                                                   | 7855  |
| A_23_P142325 | 1.3  | 2.5  | 2.8  | 1.7 | FZR1 | Homo sapiens fizzy/cell division cycle 20 related 1 (Drosophila) (FZR1), transcript variant 1, mRNA [NM_001136198] | 51343 |
| A_23_P142333 | 2.2  | 1.4  | -1.5 | 1.6 | FZR1 | Homo sapiens fizzy/cell division cycle 20 related 1 (Drosophila) (FZR1), transcript variant 2, mRNA [NM_016263]    | 51343 |
| A_24_P941759 | 1.3  | -2.3 | -1.7 | 1.2 | G2E3 | Homo sapiens G2/M-phase specific E3 ubiquitin protein ligase (G2E3), mRNA [NM_017769]                              | 55632 |

|             |      |      |     |      |           |                                                                                                  |       |
|-------------|------|------|-----|------|-----------|--------------------------------------------------------------------------------------------------|-------|
| A_23_P67960 | -1.4 | -2.0 | 1.0 | -2.4 | G6PC2     | Homo sapiens glucose-6-phosphatase, catalytic, 2 (G6PC2), transcript variant 1, mRNA [NM_021176] | 57818 |
| A_24_P98843 | 3.0  | 1.1  | 1.9 | -1.8 | GAB2      | Homo sapiens GRB2-associated binding protein 2 (GAB2), transcript variant 2, mRNA [NM_012296]    | 9846  |
| A_24_P4816  | 1.5  | 2.0  | 1.3 | -1.1 | GABARAPL1 | Homo sapiens GABA(A) receptor-associated protein like 1 (GABARAPL1), mRNA [NM_031412]            | 23710 |

|              |      |      |      |      |           |                                                                                                              |       |
|--------------|------|------|------|------|-----------|--------------------------------------------------------------------------------------------------------------|-------|
| A_23_P65823  | -1.6 | 1.2  | -3.6 | 1.1  | GABARAPL3 | Homo sapiens GABA(A) receptors associated protein like 3, pseudogene (GABARAPL3), non-coding RNA [NR_028287] | 23766 |
| A_23_P93302  | -1.3 | -2.2 | -2.4 | -2.8 | GABBR1    | Homo sapiens gamma-aminobutyric acid (GABA) B receptor, 1 (GABBR1), transcript variant 1, mRNA [NM_001470]   | 2550  |
| A_23_P112275 | -3.9 | 1.2  | 1.1  | -1.5 | GABBR2    | Homo sapiens gamma-aminobutyric acid (GABA) B receptor, 2 (GABBR2), mRNA [NM_005458]                         | 9568  |

|              |     |      |      |      |        |                                                                                                                             |        |
|--------------|-----|------|------|------|--------|-----------------------------------------------------------------------------------------------------------------------------|--------|
| A_23_P205789 | 1.5 | -3.1 | 1.0  | -1.8 | GABPB1 | Homo sapiens GA binding protein transcription factor, beta subunit 1 (GABPB1), transcript variant gamma-1, mRNA [NM_002041] | 2553   |
| A_24_P176255 | 1.0 | -1.0 | -2.1 | -1.7 | GABPB1 | Homo sapiens GA binding protein transcription factor, beta subunit 1 (GABPB1), transcript variant beta-1, mRNA [NM_005254]  | 2553   |
| A_32_P177937 | 1.1 | -7.2 | -1.2 | 1.6  | GABPB2 | GA binding protein transcription factor, beta subunit 2 [Source:HGNC Symbol;Acc:28441] [ENST0000368918]                     | 126626 |

|              |      |      |      |      |        |                                                                                                                  |      |
|--------------|------|------|------|------|--------|------------------------------------------------------------------------------------------------------------------|------|
| A_23_P125067 | -1.7 | 1.1  | -2.1 | 1.6  | GABRA1 | Homo sapiens gamma-aminobutyric acid (GABA) A receptor, alpha 1 (GABRA1), transcript variant 1, mRNA [NM_000806] | 2554 |
| A_24_P226267 | -1.6 | -2.4 | 1.1  | -1.4 | GABRA1 | Homo sapiens gamma-aminobutyric acid (GABA) A receptor, alpha 1 (GABRA1), transcript variant 1, mRNA [NM_000806] | 2554 |
| A_23_P212869 | 1.7  | 1.7  | 1.7  | -2.7 | GABRA2 | Homo sapiens gamma-aminobutyric acid (GABA) A receptor, alpha 2 (GABRA2), transcript variant 1, mRNA [NM_000807] | 2555 |



|              |      |      |      |      |        |                                                                                                                  |      |
|--------------|------|------|------|------|--------|------------------------------------------------------------------------------------------------------------------|------|
| A_23_P436618 | -3.5 | 10.7 | 10.6 | 5.9  | GABRA5 | Homo sapiens gamma-aminobutyric acid (GABA) A receptor, alpha 5 (GABRA5), transcript variant 1, mRNA [NM_000810] | 2558 |
| A_23_P19042  | 1.5  | 2.1  | -1.5 | -2.6 | GABRB2 | Homo sapiens gamma-aminobutyric acid (GABA) A receptor, beta 2 (GABRB2), transcript variant 2, mRNA [NM_000813]  | 2561 |
| A_23_P10966  | -5.0 | -1.2 | -2.1 | 1.0  | GABRB3 | Homo sapiens gamma-aminobutyric acid (GABA) A receptor, beta 3 (GABRB3), transcript variant 1, mRNA [NM_000814]  | 2562 |

|              |      |      |       |      |       |                                                                                                             |       |
|--------------|------|------|-------|------|-------|-------------------------------------------------------------------------------------------------------------|-------|
| A_32_P115840 | -1.0 | -6.6 | -1.0  | -1.8 | GABRQ | gamma-aminobutyric acid (GABA) receptor, theta<br>[Source:HGNC Symbol;Accession:14454]<br>[ENST00000370306] | 55879 |
| A_23_P209578 | -1.3 | -1.8 | -13.9 | -1.2 | GAD1  | Homo sapiens glutamate decarboxylase 1 (brain, 67kDa) (GAD1), transcript variant GAD25, mRNA [NM_013445]    | 2571  |
| A_23_P374689 | 2.3  | 1.8  | 1.4   | 1.3  | GAD1  | Homo sapiens glutamate decarboxylase 1 (brain, 67kDa) (GAD1), transcript variant GAD67, mRNA [NM_000817]    | 2571  |

|              |      |      |      |      |         |                                                                                                                            |      |
|--------------|------|------|------|------|---------|----------------------------------------------------------------------------------------------------------------------------|------|
| A_23_P75008  | -1.8 | -1.5 | -2.2 | 1.1  | GAD2    | Homo sapiens glutamate decarboxylase 2 (pancreatic islets and brain, 65kDa) (GAD2), transcript variant 1, mRNA [NM_000818] | 2572 |
| A_23_P23221  | -2.0 | -2.8 | -2.5 | -1.2 | GADD45A | Homo sapiens growth arrest and DNA-damage-inducible, alpha (GADD45A), transcript variant 1, mRNA [NM_001924]               | 1647 |
| A_23_P142506 | 1.8  | -1.8 | -2.1 | -2.0 | GADD45B | Homo sapiens growth arrest and DNA-damage-inducible, beta (GADD45B), mRNA [NM_015675]                                      | 4616 |

|              |       |      |      |       |       |                                                                                        |           |
|--------------|-------|------|------|-------|-------|----------------------------------------------------------------------------------------|-----------|
| A_32_P39444  | -1.3  | 2.1  | -1.1 | -1.1  | GAF1  | Homo sapiens FGF2-associated protein GAF1 (GAF1) mRNA, complete cds. [AF190748]        | 100131227 |
| A_24_P911025 | -4.3  | -1.8 | -1.1 | -1.0  | GAF2  | Homo sapiens FGF-2 activity-associated protein 2 (GAF2) mRNA, complete cds. [AF220234] | 100130322 |
| A_23_P384418 | -15.8 | -1.0 | 1.1  | -2.1  | GAGE3 | Human GAGE-3 protein mRNA, complete cds. [U19144]                                      | 2575      |
| A_24_P228796 | -1.6  | 1.0  | -2.4 | 1.1   | GAGE7 | Homo sapiens G antigen 7 (GAGE7), mRNA [NM_021123]                                     | 2579      |
| A_24_P397150 | -1.3  | -1.0 | -1.4 | -31.6 | GAK   | Homo sapiens cyclin G associated kinase (GAK), mRNA [NM_005255]                        | 2580      |

|              |      |     |      |      |         |                                                                                  |       |
|--------------|------|-----|------|------|---------|----------------------------------------------------------------------------------|-------|
| A_23_P326157 | -2.0 | 1.2 | -1.8 | 1.1  | GAL3ST2 | Homo sapiens galactose-3-O-sulfotransferase 2 (GAL3ST2), mRNA [NM_022134]        | 64090 |
| A_24_P352608 | -2.5 | 1.0 | 1.0  | 1.1  | GALC    | Homo sapiens galactosylceramidase (GALC), transcript variant 1, mRNA [NM_000153] | 2581  |
| A_23_P141126 | 1.9  | 2.5 | -1.0 | -1.2 | GALK1   | Homo sapiens galactokinase 1 (GALK1), mRNA [NM_000154]                           | 2584  |
| A_23_P48807  | 2.8  | 2.6 | 2.6  | 1.9  | GALK2   | Homo sapiens galactokinase 2 (GALK2), transcript variant 2, mRNA [NM_00101556]   | 2585  |

|              |      |     |      |     |         |                                                                                                                                            |       |
|--------------|------|-----|------|-----|---------|--------------------------------------------------------------------------------------------------------------------------------------------|-------|
| A_23_P306105 | 4.2  | 4.7 | 1.0  | 3.4 | GALNT1  | Homo sapiens UDP-N-acetyl-alpha-D-galactosamine:polypeptide N-acetylgalactosaminyl transferase 1 (GalNAc-T1) (GALNT1), mRNA [NM_020474]    | 2589  |
| A_24_P910923 | -6.2 | 1.3 | -2.0 | 1.1 | GALNT10 | Homo sapiens UDP-N-acetyl-alpha-D-galactosamine:polypeptide N-acetylgalactosaminyl transferase 10 (GalNAc-T10) (GALNT10), mRNA [NM_198321] | 55568 |

|              |      |      |      |      |         |                                                                                                                                            |       |
|--------------|------|------|------|------|---------|--------------------------------------------------------------------------------------------------------------------------------------------|-------|
| A_24_P161964 | -1.2 | 1.2  | 2.3  | 1.5  | GALNT10 | Homo sapiens UDP-N-acetyl-alpha-D-galactosamine:polypeptide N-acetylgalactosaminyl transferase 10 (GalNAc-T10) (GALNT10), mRNA [NM_198321] | 55568 |
| A_23_P8412   | -7.7 | -1.0 | -1.1 | -1.1 | GALNT11 | Homo sapiens UDP-N-acetyl-alpha-D-galactosamine:polypeptide N-acetylgalactosaminyl transferase 11 (GalNAc-T11) (GALNT11), mRNA [NM_022087] | 63917 |

|              |      |     |      |       |         |                                                                                                                                                        |        |
|--------------|------|-----|------|-------|---------|--------------------------------------------------------------------------------------------------------------------------------------------------------|--------|
| A_32_P492524 | 1.0  | 1.0 | -1.0 | -16.1 | GALNT13 | Homo sapiens<br>UDP-N-acetyl-alpha-D-galactosamine:polypeptide N-acetylgalactosaminyl transferase 13<br>(GalNAc-T13)<br>(GALNT13), mRNA<br>[NM_052917] | 114805 |
| A_24_P114249 | -2.3 | 1.1 | -1.1 | -1.5  | GALNT3  | Homo sapiens<br>UDP-N-acetyl-alpha-D-galactosamine:polypeptide N-acetylgalactosaminyl transferase 3<br>(GalNAc-T3)<br>(GALNT3), mRNA<br>[NM_004482]    | 2591   |



|              |      |      |      |      |        |                                                                                                                                                     |       |
|--------------|------|------|------|------|--------|-----------------------------------------------------------------------------------------------------------------------------------------------------|-------|
| A_24_P942370 | -2.5 | 1.0  | -1.0 | 1.0  | GALNT4 | Homo sapiens<br>UDP-N-acetyl-alpha-D-galactosamine:polypeptide N-acetylgalactosaminyl transferase 4<br>(GalNAc-T4)<br>(GALNT4), mRNA<br>[NM_003774] | 8693  |
| A_23_P144384 | -3.6 | -1.2 | -1.9 | -2.0 | GALNT7 | Homo sapiens<br>UDP-N-acetyl-alpha-D-galactosamine:polypeptide N-acetylgalactosaminyl transferase 7<br>(GalNAc-T7)<br>(GALNT7), mRNA<br>[NM_017423] | 51809 |

|              |      |      |     |      |         |                                                                                                                                                          |        |
|--------------|------|------|-----|------|---------|----------------------------------------------------------------------------------------------------------------------------------------------------------|--------|
| A_23_P76749  | -2.7 | -1.4 | 1.3 | -1.3 | GALNTL1 | Homo sapiens UDP-N-acetyl-alpha-D-galactosamine:poly peptide N-acetylgalactosaminyl transferase-like 1 (GALNTL1), transcript variant 2, mRNA [NM_020692] | 57452  |
| A_23_P429601 | 1.0  | -2.9 | 1.0 | 1.0  | GALNTL5 | Homo sapiens UDP-N-acetyl-alpha-D-galactosamine:poly peptide N-acetylgalactosaminyl transferase-like 5 (GALNTL5), transcript variant 1, mRNA [NM_145292] | 168391 |

|              |      |      |      |      |       |                                                                                                   |       |
|--------------|------|------|------|------|-------|---------------------------------------------------------------------------------------------------|-------|
| A_23_P39171  | 1.1  | 1.0  | 2.4  | 1.1  | GALP  | Homo sapiens galanin-like peptide (GALP), transcript variant 1, mRNA [NM_033106]                  | 85569 |
| A_23_P256663 | 1.7  | 1.3  | 1.1  | 2.1  | GALR3 | Homo sapiens galanin receptor 3 (GALR3), mRNA [NM_003614]                                         | 8484  |
| A_23_P108143 | -2.4 | -1.8 | 1.8  | -1.2 | GAMT  | Homo sapiens guanidino acetate N-methyltransferase (GAMT), transcript variant 1, mRNA [NM_000156] | 2593  |
| A_24_P19228  | -2.5 | 2.0  | -3.3 | -2.1 | GAMT  | Homo sapiens guanidino acetate N-methyltransferase (GAMT), transcript variant 2, mRNA [NM_138924] | 2593  |

|              |      |      |      |      |        |                                                                                                 |       |
|--------------|------|------|------|------|--------|-------------------------------------------------------------------------------------------------|-------|
| A_23_P88873  | 2.9  | 3.0  | 2.8  | 3.1  | GAN    | Homo sapiens gigaxonin (GAN), mRNA [NM_022041]                                                  | 8139  |
| A_23_P399851 | -3.4 | -2.1 | -1.2 | -2.1 | GANAB  | Homo sapiens glucosidase, alpha; neutral AB (GANAB), transcript variant 3, mRNA [NM_198335]     | 23193 |
| A_23_P67646  | 1.0  | -1.0 | -1.1 | -2.9 | GAPDHS | Homo sapiens glyceraldehyde-3-phosphate dehydrogenase, spermatogenic (GAPDHS), mRNA [NM_014364] | 26330 |
| A_23_P83320  | 1.1  | 1.1  | 1.0  | -5.2 | GARNL3 | Homo sapiens GTPase activating Rap/RanGAP domain-like 3 (GARNL3), mRNA [NM_032293]              | 84253 |

|              |      |      |      |       |        |                                                                                                  |       |
|--------------|------|------|------|-------|--------|--------------------------------------------------------------------------------------------------|-------|
| A_24_P154948 | 2.0  | 2.0  | 2.0  | -12.2 | GARS   | Homo sapiens glycyl-tRNA synthetase (GARS), mRNA [NM_002047]                                     | 2617  |
| A_24_P179363 | -1.3 | -1.2 | -1.4 | -5.5  | GAS2   | Homo sapiens hypothetical LOC100137724, mRNA (cDNA clone IMAGE:3608551), partial cds. [BC005077] | 2620  |
| A_32_P24140  | 2.4  | 2.4  | 2.3  | 1.5   | GAS2   | Homo sapiens growth arrest-specific 2 (GAS2), transcript variant 1, mRNA [NM_005256]             | 2620  |
| A_23_P502710 | 4.1  | 3.8  | 1.8  | 3.2   | GAS2L1 | Homo sapiens growth arrest-specific 2 like 1 (GAS2L1), transcript variant 3, mRNA [NM_152237]    | 10634 |

|              |      |      |      |      |        |                                                                                      |        |
|--------------|------|------|------|------|--------|--------------------------------------------------------------------------------------|--------|
| A_23_P396818 | 2.3  | 2.9  | 1.1  | -2.3 | GAS2L2 | Homo sapiens growth arrest-specific 2 like 2 (GAS2L2), mRNA [NM_139285]              | 246176 |
| A_32_P37143  | -2.3 | 1.0  | 1.0  | -1.0 | GAS2L3 | growth arrest-specific 2 like 3 [Source:HGNC Symbol;Acc:27475] [ENST00000552854]     | 283431 |
| A_24_P82466  | 2.2  | 2.1  | 1.8  | 1.8  | GAS7   | Homo sapiens growth arrest-specific 7 (GAS7), transcript variant c, mRNA [NM_201433] | 8522   |
| A_23_P206435 | -2.2 | -1.6 | -1.7 | -1.6 | GAS8   | Homo sapiens growth arrest-specific 8 (GAS8), transcript variant 1, mRNA [NM_001481] | 2622   |

|              |      |      |      |      |        |                                                                                        |       |
|--------------|------|------|------|------|--------|----------------------------------------------------------------------------------------|-------|
| A_23_P159191 | -1.2 | -1.7 | -3.8 | -2.6 | GAST   | Homo sapiens gastrin (GAST), mRNA [NM_00805]                                           | 2520  |
| A_23_P75056  | 2.1  | 2.1  | 1.1  | 1.9  | GATA3  | Homo sapiens GATA binding protein 3 (GATA3), transcript variant 1, mRNA [NM_001002295] | 2625  |
| A_23_P384761 | -2.5 | 1.4  | -5.0 | 1.0  | GATA4  | Homo sapiens GATA binding protein 4 (GATA4), mRNA [NM_002052]                          | 2626  |
| A_24_P35169  | 1.2  | 1.2  | 1.1  | -8.5 | GATAD1 | Homo sapiens GATA zinc finger domain containing 1 (GATAD1), mRNA [NM_021167]           | 57798 |

|              |     |       |      |      |      |                                                                                                                                |        |
|--------------|-----|-------|------|------|------|--------------------------------------------------------------------------------------------------------------------------------|--------|
| A_32_P227764 | 1.1 | 1.0   | -2.8 | -1.1 | GATC | Homo sapiens glutamyl-tRNA(Gln) amidotransferase, subunit C homolog (bacterial) (GATC), transcript variant 1, mRNA [NM_176818] | 283459 |
| A_24_P402115 | 1.0 | -10.8 | -1.0 | -1.4 | GATC | Homo sapiens hypothetical protein LOC283459, mRNA (cDNA clone IMAGE:4822098). [BC034962]                                       | 283459 |
| A_32_P141374 | 2.0 | 2.6   | 2.3  | 1.3  | GATS | Homo sapiens GATS, stromal antigen 3 opposite strand (GATS), transcript variant 1, mRNA [NM_178831]                            | 352954 |



|              |     |      |      |      |      |                                                                                                               |        |
|--------------|-----|------|------|------|------|---------------------------------------------------------------------------------------------------------------|--------|
| A_24_P942538 | 3.3 | -1.5 | 2.5  | 2.7  | GATS | Homo sapiens GATS, stromal antigen 3 opposite strand (GATS), transcript variant 2, non-coding RNA [NR_028038] | 352954 |
| A_23_P327777 | 1.2 | -1.2 | -2.5 | -1.6 | GATS | Homo sapiens GATS, stromal antigen 3 opposite strand (GATS), transcript variant 1, mRNA [NM_178831]           | 352954 |
| A_32_P464568 | 1.1 | 1.8  | 2.0  | -1.0 | GBA2 | Homo sapiens glucosidase, beta (bile acid) 2 (GBA2), mRNA [NM_020944]                                         | 57704  |

|              |      |      |      |      |       |                                                                                                                              |       |
|--------------|------|------|------|------|-------|------------------------------------------------------------------------------------------------------------------------------|-------|
| A_32_P512061 | -2.3 | 1.3  | 1.2  | -1.8 | GBAP1 | Homo sapiens glucosidase, beta, acid pseudogene 1 (GBAP1), non-coding RNA [NR_002188]                                        | 2630  |
| A_23_P161237 | 1.0  | 1.5  | 1.0  | 2.4  | GBF1  | Homo sapiens golgi brefeldin A resistant guanine nucleotide exchange factor 1 (GBF1), transcript variant 1, mRNA [NM_004193] | 8729  |
| A_23_P146576 | -5.2 | -1.3 | -1.7 | -1.6 | GBGT1 | Homo sapiens globoside alpha-1,3-N-acetylgalactosaminyl transferase 1 (GBGT1), mRNA [NM_021996]                              | 26301 |

|              |       |      |      |      |      |                                                                                                   |      |
|--------------|-------|------|------|------|------|---------------------------------------------------------------------------------------------------|------|
| A_32_P107372 | -12.9 | -1.2 | -1.4 | -1.8 | GBP1 | Homo sapiens guanylate binding protein 1, interferon-inducible (GBP1), mRNA [NM_002053]           | 2633 |
| A_24_P36898  | 11.9  | 11.7 | 16.3 | 9.1  | GBP2 | guanylate binding protein 2, interferon-inducible [Source:HGNC Symbol;Acc:4183] [ENST00000464839] | 2634 |
| A_23_P51487  | -1.1  | 1.1  | -2.3 | -1.1 | GBP3 | Homo sapiens guanylate binding protein 3 (GBP3), mRNA [NM_018284]                                 | 2635 |
| A_24_P370702 | -1.7  | -1.0 | -2.0 | -1.6 | GBP3 | Homo sapiens guanylate binding protein 3 (GBP3), mRNA [NM_018284]                                 | 2635 |

|              |      |      |      |      |      |                                                                                |        |
|--------------|------|------|------|------|------|--------------------------------------------------------------------------------|--------|
| A_24_P45446  | 5.3  | 8.5  | 2.2  | 1.0  | GBP4 | Homo sapiens guanylate binding protein 4 (GBP4), mRNA [NM_052941]              | 115361 |
| A_23_P103496 | -1.6 | 1.0  | -5.6 | -2.0 | GBP4 | Homo sapiens guanylate binding protein 4 (GBP4), mRNA [NM_052941]              | 115361 |
| A_23_P131183 | 1.8  | 1.8  | -1.1 | 2.8  | GBX2 | Homo sapiens gastrulation brain homeobox 2 (GBX2), mRNA [NM_001485]            | 2637   |
| A_23_P71094  | 1.0  | -2.0 | -1.1 | -1.1 | GCC1 | Homo sapiens GRIP and coiled-coil domain containing 1 (GCC1), mRNA [NM_024523] | 79571  |
| A_23_P71091  | 4.1  | 1.2  | 2.9  | 1.6  | GCC1 | Homo sapiens GRIP and coiled-coil domain containing 1 (GCC1), mRNA [NM_024523] | 79571  |

|              |      |      |      |      |       |                                                                                                        |        |
|--------------|------|------|------|------|-------|--------------------------------------------------------------------------------------------------------|--------|
| A_24_P85942  | -4.7 | -1.0 | -1.1 | -1.6 | GCC2  | Homo sapiens GRIP and coiled-coil domain containing 2 (GCC2), transcript variant 1, mRNA [NM_181453]   | 9648   |
| A_23_P253250 | -2.0 | 1.3  | 2.0  | 2.6  | GCET2 | Homo sapiens germinal center expressed transcript 2 (GCET2), transcript variant 3, mRNA [NM_001190259] | 257144 |
| A_24_P182947 | -3.4 | -2.4 | -1.1 | -1.0 | GCET2 | Homo sapiens germinal center expressed transcript 2 (GCET2), transcript variant 3, mRNA [NM_001190259] | 257144 |

|              |      |      |      |      |       |                                                                                                    |       |
|--------------|------|------|------|------|-------|----------------------------------------------------------------------------------------------------|-------|
| A_23_P211064 | -1.6 | -1.4 | 1.1  | -2.1 | GCFC1 | Homo sapiens GC-rich sequence DNA-binding factor 1 (GCFC1), transcript variant 2, mRNA [NM_013329] | 94104 |
| A_24_P279938 | 1.9  | 1.5  | -3.9 | 2.0  | GCFC1 | Homo sapiens GC-rich sequence DNA-binding factor 1 (GCFC1), transcript variant 2, mRNA [NM_013329] | 94104 |
| A_23_P15751  | -1.6 | -1.1 | -2.8 | -1.1 | GCGR  | Homo sapiens glucagon receptor (GCGR), mRNA [NM_000160]                                            | 2642  |
| A_24_P167642 | -1.0 | -2.6 | -3.3 | -2.5 | GCH1  | Homo sapiens GTP cyclohydrolase 1 (GCH1), transcript variant 1, mRNA [NM_000161]                   | 2643  |

|              |      |      |      |      |      |                                                                                       |      |
|--------------|------|------|------|------|------|---------------------------------------------------------------------------------------|------|
| A_23_P250206 | -1.4 | -2.6 | -1.4 | -1.4 | GCK  | Homo sapiens glucokinase (hexokinase 4) (GCK), transcript variant 3, mRNA [NM_033508] | 2645 |
| A_23_P119886 | 2.7  | 2.8  | -1.3 | 1.8  | GCKR | Homo sapiens glucokinase (hexokinase 4) regulator (GCKR), mRNA [NM_001486]            | 2646 |
| A_32_P98732  | -1.7 | 1.5  | -2.4 | -1.5 | GCM1 | Homo sapiens glial cells missing homolog 1 (Drosophila) (GCM1), mRNA [NM_003643]      | 8521 |
| A_23_P133728 | 1.4  | 1.0  | 2.5  | 2.0  | GCM1 | Homo sapiens glial cells missing homolog 1 (Drosophila) (GCM1), mRNA [NM_003643]      | 8521 |

|              |      |      |      |      |       |                                                                                                                                                                  |       |
|--------------|------|------|------|------|-------|------------------------------------------------------------------------------------------------------------------------------------------------------------------|-------|
| A_23_P117933 | -4.7 | 1.0  | -1.5 | -1.1 | GCSH  | Homo sapiens glycine cleavage system protein H (aminomethyl carrier) (GCSH), nuclear gene encoding mitochondrial protein, transcript variant 1, mRNA [NM_004483] | 2653  |
| A_23_P383258 | 1.0  | 1.1  | -2.3 | -1.2 | GDA   | Homo sapiens guanine deaminase (GDA), transcript variant 2, mRNA [NM_004293]                                                                                     | 9615  |
| A_24_P233878 | -1.4 | -1.5 | -1.1 | 2.5  | GDAP2 | Homo sapiens ganglioside induced differentiation associated protein 2 (GDAP2), transcript variant 1, mRNA [NM_017686]                                            | 54834 |



|              |     |      |     |      |      |                                                                          |        |
|--------------|-----|------|-----|------|------|--------------------------------------------------------------------------|--------|
| A_23_P209098 | 3.4 | 2.7  | 4.4 | -1.0 | GDF1 | Homo sapiens growth differentiation factor 1 (GDF1), mRNA [NM_001492]    | 2657   |
| A_23_P46755  | 1.1 | 2.3  | 1.0 | -1.0 | GDF2 | Homo sapiens growth differentiation factor 2 (GDF2), mRNA [NM_016204]    | 2658   |
| A_23_P259955 | 2.0 | 1.2  | 1.1 | 1.7  | GDF5 | Homo sapiens growth differentiation factor 5 (GDF5), mRNA [NM_000557]    | 8200   |
| A_32_P140489 | 1.7 | -3.1 | 1.0 | -1.3 | GDF6 | Homo sapiens growth differentiation factor 6 (GDF6), mRNA [NM_001001557] | 392255 |

|              |     |      |      |      |       |                                                                                                                          |        |
|--------------|-----|------|------|------|-------|--------------------------------------------------------------------------------------------------------------------------|--------|
| A_24_P376451 | 2.1 | 2.5  | -1.2 | -1.2 | GDNF  | Homo sapiens glial cell derived neurotrophic factor (GDNF), transcript variant 4, mRNA [NM_001190469]                    | 2668   |
| A_24_P920730 | 1.8 | -2.0 | -3.1 | 1.0  | GDPD1 | Homo sapiens glycerophosphodiester phosphodiesterase domain containing 1 (GDPD1), transcript variant 1, mRNA [NM_182569] | 284161 |
| A_23_P217498 | 2.0 | 2.0  | 1.7  | 1.4  | GDPD2 | Homo sapiens glycerophosphodiester phosphodiesterase domain containing 2 (GDPD2), transcript variant 2, mRNA [NM_017711] | 54857  |

|              |     |      |      |      |        |                                                                                                                 |       |
|--------------|-----|------|------|------|--------|-----------------------------------------------------------------------------------------------------------------|-------|
| A_23_P257043 | 1.2 | -2.1 | -1.0 | -1.0 | GEM    | Homo sapiens GTP binding protein overexpressed in skeletal muscle (GEM), transcript variant 1, mRNA [NM_005261] | 2669  |
| A_23_P336513 | 1.1 | 1.1  | -1.2 | -2.5 | GEMIN5 | Homo sapiens gem (nuclear organelle) associated protein 5 (GEMIN5), transcript variant 1, mRNA [NM_015465]      | 25929 |
| A_23_P56567  | 1.6 | 1.6  | 2.1  | 1.0  | GEMIN6 | Homo sapiens gem (nuclear organelle) associated protein 6 (GEMIN6), mRNA [NM_024775]                            | 79833 |

|              |      |      |      |      |          |                                                                                                               |        |
|--------------|------|------|------|------|----------|---------------------------------------------------------------------------------------------------------------|--------|
| A_23_P89910  | 2.3  | -1.5 | 1.7  | -1.2 | GEMIN7   | Homo sapiens gem (nuclear organelle) associated protein 7 (GEMIN7), transcript variant 1, mRNA [NM_024707]    | 79760  |
| A_32_P197620 | -5.8 | 1.3  | 1.7  | -3.0 | GEMIN8P4 | Homo sapiens gem (nuclear organelle) associated protein 8 pseudogene 4 (GEMIN8P4), non-coding RNA [NR_002830] | 492303 |
| A_23_P66593  | 1.0  | -2.0 | -1.0 | -1.0 | GFAP     | Homo sapiens glial fibrillary acidic protein (GFAP), transcript variant 1, mRNA [NM_002055]                   | 2670   |

|              |      |      |      |      |       |                                                                                                                   |      |
|--------------|------|------|------|------|-------|-------------------------------------------------------------------------------------------------------------------|------|
| A_24_P59786  | 1.0  | -1.0 | -1.1 | -7.1 | GFAP  | Homo sapiens glial fibrillary acidic protein (GFAP), transcript variant 3, mRNA [NM_001242376]                    | 2670 |
| A_24_P31003  | -3.3 | 1.0  | -1.0 | 1.1  | GFER  | Homo sapiens growth factor, augmentor of liver regeneration (GFER), mRNA [NM_005262]                              | 2671 |
| A_23_P343303 | 2.6  | -1.0 | 1.0  | 1.1  | GFI1B | Homo sapiens growth factor independent 1B transcription repressor (GFI1B), transcript variant 1, mRNA [NM_004188] | 8328 |

|              |      |      |      |      |       |                                                                                                                                               |       |
|--------------|------|------|------|------|-------|-----------------------------------------------------------------------------------------------------------------------------------------------|-------|
| A_23_P216845 | 1.6  | 1.3  | 2.1  | 1.2  | GFI1B | Homo sapiens growth factor independent 1B transcription repressor (GFI1B), transcript variant 1, mRNA [NM_004188]                             | 8328  |
| A_24_P76489  | 1.0  | -2.4 | -1.0 | -1.0 | GFM1  | G elongation factor, mitochondrial 1 [Source:HGNC Symbol;Acc:13780] [ENST00000312756]                                                         | 85476 |
| A_24_P137582 | -1.4 | 1.2  | -1.5 | -4.1 | GFM2  | Homo sapiens G elongation factor, mitochondrial 2 (GFM2), nuclear gene encoding mitochondrial protein, transcript variant 3, mRNA [NM_170681] | 84340 |

|              |       |      |      |      |       |                                                                                                                  |       |
|--------------|-------|------|------|------|-------|------------------------------------------------------------------------------------------------------------------|-------|
| A_23_P122662 | 1.1   | -2.5 | -2.4 | -2.4 | GFOD1 | Homo sapiens glucose-fructose oxidoreductase domain containing 1 (GFOD1), transcript variant 1, mRNA [NM_018988] | 54438 |
| A_23_P12686  | -26.3 | -1.1 | -1.2 | -1.2 | GFRA1 | Homo sapiens GDNF family receptor alpha 1 (GFRA1), transcript variant 2, mRNA [NM_145793]                        | 2674  |
| A_32_P59549  | -2.5  | -1.0 | -1.1 | -1.0 | GFRA1 | Homo sapiens GDNF family receptor alpha 1 (GFRA1), transcript variant 2, mRNA [NM_145793]                        | 2674  |

|              |       |      |      |       |       |                                                                                                             |       |
|--------------|-------|------|------|-------|-------|-------------------------------------------------------------------------------------------------------------|-------|
| A_32_P162507 | 76.8  | 40.7 | 66.0 | 55.1  | GFRA2 | Homo sapiens GDNF family receptor alpha 2 (GFRA2), transcript variant 1, mRNA [NM_001495]                   | 2675  |
| A_23_P41987  | 1.1   | -4.3 | 1.4  | 2.0   | GFRA3 | Homo sapiens GDNF family receptor alpha 3 (GFRA3), mRNA [NM_001496]                                         | 2676  |
| A_23_P41992  | 1.6   | 1.6  | -1.8 | -2.5  | GFRA3 | Homo sapiens GDNF family receptor alpha 3 (GFRA3), mRNA [NM_001496]                                         | 2676  |
| A_24_P416257 | -19.6 | 1.6  | 2.6  | -11.4 | GGA2  | Homo sapiens golgi-associated, gamma adaptin ear containing, ARF binding protein 2 (GGA2), mRNA [NM_015044] | 23062 |



|              |      |      |      |      |      |                                                                                                                                      |       |
|--------------|------|------|------|------|------|--------------------------------------------------------------------------------------------------------------------------------------|-------|
| A_23_P38181  | -1.2 | -1.2 | -2.7 | -2.1 | GGA3 | Homo sapiens golgi-associated, gamma adaptin ear containing, ARF binding protein 3 (GGA3), transcript variant long, mRNA [NM_138619] | 23163 |
| A_32_P221337 | -1.6 | 3.7  | -1.5 | -1.9 | GGCX | Homo sapiens gamma-glutamyl carboxylase (GGCX), transcript variant 1, mRNA [NM_000821]                                               | 2677  |
| A_24_P933180 | 1.1  | -4.9 | -1.1 | 1.0  | GGCX | Homo sapiens gamma-glutamyl carboxylase (GGCX), transcript variant 1, mRNA [NM_000821]                                               | 2677  |

|              |      |      |      |      |        |                                                                                        |        |
|--------------|------|------|------|------|--------|----------------------------------------------------------------------------------------|--------|
| A_32_P181103 | 1.3  | 1.3  | -2.6 | 1.3  | GGCX   | Homo sapiens gamma-glutamyl carboxylase (GGCX), transcript variant 1, mRNA [NM_000821] | 2677   |
| A_23_P333552 | -7.1 | -4.6 | -3.9 | -4.3 | GGN    | Homo sapiens gametogonin (GGN), mRNA [NM_152657]                                       | 199720 |
| A_24_P67892  | -1.5 | -1.4 | -1.7 | -2.2 | GGNBP2 | Homo sapiens gametogonin binding protein 2 (GGNBP2), mRNA [NM_024835]                  | 79893  |
| A_24_P67976  | 1.2  | 1.2  | 2.0  | -2.4 | GGNBP2 | Homo sapiens gametogonin binding protein 2 (GGNBP2), mRNA [NM_024835]                  | 79893  |

|              |     |     |      |      |       |                                                                                         |      |
|--------------|-----|-----|------|------|-------|-----------------------------------------------------------------------------------------|------|
| A_23_P120809 | 4.5 | 5.4 | 4.3  | 6.7  | GGT1  | Homo sapiens gamma-glutamyltransferase 1 (GGT1), transcript variant 1, mRNA [NM_005265] | 2678 |
| A_23_P154986 | 1.5 | 1.4 | -3.7 | -1.0 | GGT1  | Homo sapiens gamma-glutamyltransferase 1 (GGT1), transcript variant 1, mRNA [NM_005265] | 2678 |
| A_24_P178175 | 6.0 | 1.5 | 1.0  | -1.5 | GGT1  | Homo sapiens gamma-glutamyltransferase 1 (GGT1), transcript variant 1, mRNA [NM_005265] | 2678 |
| A_24_P42066  | 4.3 | 1.9 | 2.4  | 1.9  | GGT3P | Homo sapiens gamma-glutamyltransferase 3 pseudogene (GGT3P), non-coding RNA [NR_003267] | 2679 |

|              |      |     |      |      |      |                                                                                         |        |
|--------------|------|-----|------|------|------|-----------------------------------------------------------------------------------------|--------|
| A_23_P66767  | 1.0  | 2.1 | -1.1 | -1.0 | GGT6 | Homo sapiens gamma-glutamyltransferase 6 (GGT6), transcript variant 2, mRNA [NM_153338] | 124975 |
| A_23_P66774  | 3.4  | 6.4 | 2.1  | 4.4  | GGT6 | Homo sapiens gamma-glutamyltransferase 6 (GGT6), transcript variant 2, mRNA [NM_153338] | 124975 |
| A_23_P325093 | 9.6  | 4.2 | 4.3  | 2.2  | GGT7 | Homo sapiens gamma-glutamyltransferase 7 (GGT7), mRNA [NM_178026]                       | 2686   |
| A_23_P207194 | -2.2 | 2.9 | 2.5  | -1.4 | GH1  | Homo sapiens growth hormone 1 (GH1), transcript variant 1, mRNA [NM_000515]             | 2688   |

|              |       |      |      |      |      |                                                                                   |       |
|--------------|-------|------|------|------|------|-----------------------------------------------------------------------------------|-------|
| A_24_P216014 | -1.1  | -2.9 | -1.2 | -1.0 | GH2  | Homo sapiens growth hormone 2 (GH2), transcript variant 3, mRNA [NM_022558]       | 2689  |
| A_23_P207160 | 1.3   | 2.8  | 1.1  | -1.0 | GH2  | Homo sapiens growth hormone 2 (GH2), transcript variant 3, mRNA [NM_022558]       | 2689  |
| A_23_P207174 | 1.1   | 1.2  | -8.6 | -1.6 | GH2  | Homo sapiens growth hormone 2 (GH2), transcript variant 2, mRNA [NM_022557]       | 2689  |
| A_24_P258800 | -12.2 | -1.9 | -1.8 | -1.5 | GHDC | Homo sapiens GH3 domain containing (GHDC), transcript variant 1, mRNA [NM_032484] | 84514 |

|              |      |      |      |      |       |                                                                                       |       |
|--------------|------|------|------|------|-------|---------------------------------------------------------------------------------------|-------|
| A_23_P104387 | 2.9  | -1.5 | -1.1 | 1.2  | GHITM | Homo sapiens growth hormone inducible transmembrane protein (GHITM), mRNA [NM_014394] | 27069 |
| A_24_P72064  | -1.3 | -1.2 | -1.4 | -2.1 | GHR   | Homo sapiens growth hormone receptor (GHR), transcript variant 1, mRNA [NM_000163]    | 2690  |
| A_23_P156087 | -2.1 | -1.1 | -1.1 | -1.1 | GHR   | Homo sapiens growth hormone receptor (GHR), transcript variant 1, mRNA [NM_000163]    | 2690  |
| A_23_P8497   | 3.6  | 3.5  | 1.0  | 2.2  | GHRHR | Homo sapiens growth hormone releasing hormone receptor (GHRHR), mRNA [NM_000823]      | 2692  |

|              |     |     |      |       |        |                                                                                                                          |           |
|--------------|-----|-----|------|-------|--------|--------------------------------------------------------------------------------------------------------------------------|-----------|
| A_24_P208737 | 1.8 | 1.0 | -2.7 | -18.3 | GHRLOS | Homo sapiens ghrelin opposite strand RNA (non-protein coding) (GHRLOS), transcript variant 1, non-coding RNA [NR_004431] | 100126793 |
| A_23_P109864 | 2.1 | 2.3 | 2.6  | -4.1  | GHSR   | Homo sapiens growth hormone secretagogue receptor (GHSR), transcript variant 1b, mRNA [NM_004122]                        | 2693      |
| A_24_P163574 | 1.8 | 2.6 | -1.0 | 2.3   | GIGYF1 | Homo sapiens GRB10 interacting GYF protein 1 (GIGYF1), mRNA [NM_022574]                                                  | 64599     |

|              |      |     |      |      |        |                                                                                                                          |       |
|--------------|------|-----|------|------|--------|--------------------------------------------------------------------------------------------------------------------------|-------|
| A_23_P142950 | -1.7 | 1.5 | 3.5  | 3.4  | GIGYF2 | Homo sapiens GRB10 interacting GYF protein 2 (GIGYF2), transcript variant 2, mRNA [NM_015575]                            | 26058 |
| A_24_P307896 | 1.0  | 1.0 | 1.0  | 2.0  | GIGYF2 | Homo sapiens GRB10 interacting GYF protein 2, mRNA (cDNA clone IMAGE:4472100), with apparent retained intron. [BC012484] | 26058 |
| A_24_P271985 | 1.1  | 1.0 | -4.5 | -2.3 | GIGYF2 | Homo sapiens GRB10 interacting GYF protein 2 (GIGYF2), transcript variant 2, mRNA [NM_015575]                            | 26058 |



|              |     |      |      |      |        |                                                                                  |        |
|--------------|-----|------|------|------|--------|----------------------------------------------------------------------------------|--------|
| A_24_P926755 | 2.4 | 3.5  | -1.5 | -1.2 | GIGYF2 | GRB10 interacting GYF protein 2 [Source:HGNC Symbol;Acc:11960] [ENST00000464402] | 26058  |
| A_23_P31188  | 1.0 | -1.0 | -1.1 | -4.8 | GIMAP1 | Homo sapiens GTPase, IMAP family member 1 (GIMAP1), mRNA [NM_130759]             | 170575 |
| A_23_P368681 | 1.0 | 1.0  | 1.0  | -8.8 | GIMAP2 | Homo sapiens GTPase, IMAP family member 2 (GIMAP2), mRNA [NM_015660]             | 26157  |
| A_23_P42588  | 1.0 | -2.4 | -1.1 | -1.1 | GIMAP5 | Homo sapiens GTPase, IMAP family member 5 (GIMAP5), mRNA [NM_018384]             | 55340  |

|              |      |      |      |      |        |                                                                                                          |        |
|--------------|------|------|------|------|--------|----------------------------------------------------------------------------------------------------------|--------|
| A_24_P274831 | 1.1  | 1.0  | 1.1  | -2.4 | GIMAP7 | Homo sapiens GTPase, IMAP family member 7 (GIMAP7), mRNA [NM_153236]                                     | 168537 |
| A_23_P168388 | -8.1 | -9.4 | -3.6 | -2.9 | GIMAP8 | Homo sapiens GTPase, IMAP family member 8 (GIMAP8), mRNA [NM_175571]                                     | 155038 |
| A_24_P132383 | 1.4  | -3.1 | -1.1 | -1.0 | GIMAP8 | Homo sapiens GTPase, IMAP family member 8 (GIMAP8), mRNA [NM_175571]                                     | 155038 |
| A_23_P130648 | -1.5 | -2.2 | -1.0 | -2.5 | GIPC1  | Homo sapiens GIPC PDZ domain containing family, member 1 (GIPC1), transcript variant 1, mRNA [NM_005716] | 10755  |

|              |      |      |      |      |       |                                                                                    |        |
|--------------|------|------|------|------|-------|------------------------------------------------------------------------------------|--------|
| A_24_P100301 | -1.0 | 1.1  | -1.1 | -2.0 | GIPC2 | Homo sapiens GIPC PDZ domain containing family, member 2 (GIPC2), mRNA [NM_017655] | 54810  |
| A_24_P118527 | 1.0  | -1.0 | 2.2  | 1.2  | GIPC3 | Homo sapiens GIPC PDZ domain containing family, member 3 (GIPC3), mRNA [NM_133261] | 126326 |
| A_24_P373768 | 1.1  | -2.3 | -2.2 | 1.2  | GIPR  | Homo sapiens gastric inhibitory polypeptide receptor (GIPR), mRNA [NM_000164]      | 2696   |
| A_23_P119395 | 3.4  | 6.2  | 8.7  | 5.4  | GIPR  | Homo sapiens gastric inhibitory polypeptide receptor (GIPR), mRNA [NM_000164]      | 2696   |

|              |      |      |      |      |      |                                                                                                                    |       |
|--------------|------|------|------|------|------|--------------------------------------------------------------------------------------------------------------------|-------|
| A_24_P347946 | -1.4 | -2.9 | -2.8 | -2.4 | GIT1 | Homo sapiens G protein-coupled receptor kinase interacting ArfGAP 1 (GIT1), transcript variant 2, mRNA [NM_014030] | 28964 |
| A_23_P100912 | -2.0 | -2.7 | -2.6 | -1.1 | GIT1 | Homo sapiens G protein-coupled receptor kinase interacting ArfGAP 1 (GIT1), transcript variant 2, mRNA [NM_014030] | 28964 |
| A_32_P205241 | 1.0  | 1.0  | -1.6 | -2.2 | GJA3 | Homo sapiens gap junction protein, alpha 3, 46kDa (GJA3), mRNA [NM_021954]                                         | 2700  |

|              |      |       |      |      |      |                                                                                                  |      |
|--------------|------|-------|------|------|------|--------------------------------------------------------------------------------------------------|------|
| A_23_P371729 | -1.0 | -1.0  | -1.1 | -2.6 | GJA5 | Homo sapiens gap junction protein, alpha 5, 40kDa (GJA5), transcript variant A, mRNA [NM_005266] | 2702 |
| A_24_P404840 | 1.1  | -1.1  | 1.3  | -2.5 | GJB1 | Homo sapiens gap junction protein, beta 1, 32kDa (GJB1), transcript variant 2, mRNA [NM_000166]  | 2705 |
| A_23_P250444 | -1.2 | -19.7 | -1.2 | 1.6  | GJB1 | Homo sapiens gap junction protein, beta 1, 32kDa (GJB1), transcript variant 2, mRNA [NM_000166]  | 2705 |

|              |      |      |      |      |        |                                                                             |        |
|--------------|------|------|------|------|--------|-----------------------------------------------------------------------------|--------|
| A_23_P51729  | 1.9  | 1.9  | -2.2 | 1.2  | GJC2   | Homo sapiens gap junction protein, gamma 2, 47kDa (GJC2), mRNA [NM_020435]  | 57165  |
| A_23_P144512 | -1.6 | -2.2 | -1.1 | -1.1 | GK2    | Homo sapiens glycerol kinase 2 (GK2), mRNA [NM_033214]                      | 2712   |
| A_23_P218579 | -1.0 | -1.8 | -1.1 | -3.4 | GLB1L  | Homo sapiens galactosidase, beta 1-like (GLB1L), mRNA [NM_024506]           | 79411  |
| A_23_P336198 | 1.1  | 1.1  | -3.7 | 1.1  | GLCCI1 | Homo sapiens glucocorticoid induced transcript 1 (GLCCI1), mRNA [NM_138426] | 113263 |
| A_24_P698125 | 7.5  | 6.3  | 5.7  | 5.8  | GLDN   | gliomedin [Source:HGNC Symbol;Acc:29514] [ENST00000464150]                  | 342035 |

|              |       |       |      |      |        |                                                                                     |        |
|--------------|-------|-------|------|------|--------|-------------------------------------------------------------------------------------|--------|
| A_24_P49199  | 1.0   | -3.9  | -1.1 | -1.1 | GLDN   | Homo sapiens gliomedin (GLDN), mRNA [NM_181789]                                     | 342035 |
| A_24_P475556 | -4.3  | -1.5  | -1.6 | -2.0 | GLG1   | Homo sapiens golgi glycoprotein 1 (GLG1), transcript variant 3, mRNA [NM_001145667] | 2734   |
| A_23_P140916 | -10.1 | -1.4  | 1.1  | -1.1 | GLG1   | Homo sapiens golgi glycoprotein 1 (GLG1), transcript variant 1, mRNA [NM_012201]    | 2734   |
| A_23_P364024 | -1.0  | -12.2 | -1.0 | -1.2 | GLIPR1 | Homo sapiens GLI pathogenesis-related 1 (GLIPR1), mRNA [NM_006851]                  | 11010  |

|              |      |     |      |     |        |                                                                                              |        |
|--------------|------|-----|------|-----|--------|----------------------------------------------------------------------------------------------|--------|
| A_23_P414913 | 1.6  | 2.2 | 1.5  | 1.0 | GLIPR2 | Homo sapiens<br>GLI pathogenesis-related 2 (GLIPR2), mRNA [NM_022343]                        | 152007 |
| A_23_P323154 | 4.5  | 7.8 | -7.9 | 2.5 | GLIS2  | Homo sapiens<br>GLIS family zinc finger 2 (GLIS2), mRNA [NM_032575]                          | 84662  |
| A_23_P350249 | -1.9 | 4.4 | 3.6  | 5.2 | GLIS3  | Homo sapiens<br>GLIS family zinc finger 3 (GLIS3), transcript variant 1, mRNA [NM_001042413] | 169792 |
| A_32_P39394  | -9.3 | 1.7 | 5.9  | 1.0 | GLIS3  | Homo sapiens<br>GLIS family zinc finger 3 (GLIS3), transcript variant 1, mRNA [NM_001042413] | 169792 |



|              |       |      |      |      |           |                                                                                                 |       |
|--------------|-------|------|------|------|-----------|-------------------------------------------------------------------------------------------------|-------|
| A_23_P312837 | -2.9  | 1.0  | 1.4  | 1.1  | GLIS3-AS1 | Homo sapiens GLIS3 antisense RNA 1 (non-protein coding) (GLIS3-AS1), non-coding RNA [NR_026663] | 84850 |
| A_23_P160742 | 1.5   | -1.6 | -3.2 | 1.4  | GLMN      | Homo sapiens glomulin, FKBP associated protein (GLMN), mRNA [NM_053274]                         | 11146 |
| A_23_P214411 | -63.6 | -1.1 | -1.2 | -1.2 | GLO1      | Homo sapiens glyoxalase I (GLO1), mRNA [NM_006708]                                              | 2739  |
| A_23_P78268  | 1.1   | -3.3 | 1.0  | 1.0  | GLOD4     | Homo sapiens glyoxalase domain containing 4 (GLOD4), mRNA [NM_016080]                           | 51031 |

|              |      |      |      |      |       |                                                                                           |      |
|--------------|------|------|------|------|-------|-------------------------------------------------------------------------------------------|------|
| A_32_P78681  | 1.0  | -6.1 | 1.4  | 1.5  | GLP2R | glucagon-like peptide 2 receptor<br>[Source:HGNC Symbol;Acc:4325]<br>[ENST00000262441]    | 9340 |
| A_23_P156261 | 1.6  | -1.1 | -8.1 | -1.2 | GLRA1 | Homo sapiens glycine receptor, alpha 1 (GLRA1), transcript variant 2, mRNA<br>[NM_000171] | 2741 |
| A_23_P411903 | -1.3 | -1.2 | -2.4 | -1.5 | GLRA2 | Homo sapiens glycine receptor, alpha 2 (GLRA2), transcript variant 1, mRNA<br>[NM_002063] | 2742 |
| A_32_P90113  | 1.2  | 1.2  | 1.1  | -2.1 | GLRA3 | glycine receptor, alpha 3<br>[Source:HGNC Symbol;Acc:4328]<br>[ENST00000274093]           | 8001 |

|              |      |       |      |     |       |                                                                                                    |       |
|--------------|------|-------|------|-----|-------|----------------------------------------------------------------------------------------------------|-------|
| A_24_P381029 | 1.0  | -1.3  | -2.9 | 1.4 | GLRX3 | Homo sapiens glutaredoxin 3 (GLRX3), transcript variant 2, mRNA [NM_006541]                        | 10539 |
| A_23_P65370  | -4.3 | -10.7 | 1.3  | 1.0 | GLRX5 | Homo sapiens glutaredoxin 5 (GLRX5), nuclear gene encoding mitochondrial protein, mRNA [NM_016417] | 51218 |
| A_23_P308800 | 2.2  | -2.0  | 1.0  | 3.3 | GLS   | glutaminase [Source:HGNC Symbol;Acc:4331] [ENST00000338435]                                        | 2744  |

|              |      |      |      |      |        |                                                                                                                         |        |
|--------------|------|------|------|------|--------|-------------------------------------------------------------------------------------------------------------------------|--------|
| A_24_P326739 | 2.4  | 2.0  | 2.0  | 1.7  | GLS2   | Homo sapiens glutaminase 2 (liver, mitochondrial) (GLS2), nuclear gene encoding mitochondrial protein, mRNA [NM_013267] | 27165  |
| A_32_P19294  | 1.0  | -1.2 | -1.7 | 2.3  | GLT1D1 | Homo sapiens glycosyltransferase 1 domain containing 1 (GLT1D1), mRNA [NM_144669]                                       | 144423 |
| A_23_P48198  | -1.0 | -2.4 | -1.0 | -1.0 | GLT8D2 | Homo sapiens glycosyltransferase 8 domain containing 2 (GLT8D2), mRNA [NM_031302]                                       | 83468  |

|              |     |      |      |      |         |                                                                                            |       |
|--------------|-----|------|------|------|---------|--------------------------------------------------------------------------------------------|-------|
| A_24_P234105 | 1.1 | 4.2  | 1.1  | -1.3 | GLTPD1  | Homo sapiens glycolipid transfer protein domain containing 1 (GLTPD1), mRNA [NM_001029885] | 80772 |
| A_23_P63281  | 2.4 | 2.4  | 3.1  | 1.5  | GLTPD1  | Homo sapiens glycolipid transfer protein domain containing 1 (GLTPD1), mRNA [NM_001029885] | 80772 |
| A_23_P39131  | 1.0 | -2.5 | -1.0 | -1.0 | GLTSCR2 | Homo sapiens glioma tumor suppressor candidate region gene 2 (GLTSCR2), mRNA [NM_015710]   | 29997 |

|              |      |     |      |      |       |                                                                                                                                     |       |
|--------------|------|-----|------|------|-------|-------------------------------------------------------------------------------------------------------------------------------------|-------|
| A_23_P138665 | 1.1  | 1.1 | -4.8 | 1.2  | GLUD1 | Homo sapiens glutamate dehydrogenase 1 (GLUD1), nuclear gene encoding mitochondrial protein, mRNA [NM_005271]                       | 2746  |
| A_23_P403886 | -4.1 | 1.1 | -1.7 | -1.0 | GLYAT | Homo sapiens glycine-N-acyltransferase (GLYAT), nuclear gene encoding mitochondrial protein, transcript variant 2, mRNA [NM_005838] | 10249 |

|              |     |      |      |     |         |                                                                                                                                     |        |
|--------------|-----|------|------|-----|---------|-------------------------------------------------------------------------------------------------------------------------------------|--------|
| A_23_P75749  | 3.6 | 3.5  | 4.9  | 2.6 | GLYAT   | Homo sapiens glycine-N-acyltransferase (GLYAT), nuclear gene encoding mitochondrial protein, transcript variant 1, mRNA [NM_201648] | 10249  |
| A_23_P47484  | 1.5 | -1.3 | 3.9  | 1.5 | GLYATL2 | Homo sapiens glycine-N-acyltransferase-like 2 (GLYATL2), mRNA [NM_145016]                                                           | 219970 |
| A_24_P385092 | 2.4 | 1.4  | -1.5 | 1.0 | GLYCAM1 | Homo sapiens glycosylation dependent cell adhesion molecule 1 (pseudogene) (GLYCAM1), non-coding RNA [NR_003039]                    | 644076 |

|              |      |      |      |      |        |                                                                                       |        |
|--------------|------|------|------|------|--------|---------------------------------------------------------------------------------------|--------|
| A_23_P29621  | 1.0  | -2.6 | -4.0 | 1.0  | GLYCTK | Homo sapiens glycerate kinase (GLYCTK), transcript variant 1, mRNA [NM_145262]        | 132158 |
| A_23_P218302 | 5.1  | 4.7  | 4.8  | 6.1  | GLYR1  | Homo sapiens glyoxylate reductase 1 homolog (Arabidopsis) (GLYR1), mRNA [NM_032569]   | 84656  |
| A_23_P144866 | -3.3 | -1.4 | 2.3  | 1.4  | GM2A   | Homo sapiens GM2 ganglioside activator (GM2A), transcript variant 1, mRNA [NM_000405] | 2760   |
| A_24_P925314 | -2.5 | 1.0  | 1.3  | -4.9 | GM2A   | Homo sapiens GM2 ganglioside activator (GM2A), transcript variant 1, mRNA [NM_000405] | 2760   |



|              |      |      |      |     |       |                                                                                       |       |
|--------------|------|------|------|-----|-------|---------------------------------------------------------------------------------------|-------|
| A_23_P144872 | 2.2  | 1.2  | 1.1  | 1.1 | GM2A  | Homo sapiens GM2 ganglioside activator (GM2A), transcript variant 1, mRNA [NM_000405] | 2760  |
| A_23_P28375  | 7.6  | 6.7  | 7.0  | 6.9 | GMCL1 | Homo sapiens germ cell-less homolog 1 (Drosophila) (GMCL1), mRNA [NM_178439]          | 64395 |
| A_32_P84388  | -1.2 | -2.0 | -1.5 | 1.1 | GMCL1 | Homo sapiens germ cell-less homolog 1 (Drosophila) (GMCL1), mRNA [NM_178439]          | 64395 |

|              |      |      |      |       |       |                                                                                                     |       |
|--------------|------|------|------|-------|-------|-----------------------------------------------------------------------------------------------------|-------|
| A_24_P621023 | 1.1  | 1.1  | 1.0  | -23.3 | GMEB1 | glucocorticoid modulatory element binding protein 1 [Source:HGNC Symbol;Acc:4370] [ENST00000373816] | 10691 |
| A_23_P337033 | -3.5 | -1.8 | -2.0 | -2.7  | GMEB2 | Homo sapiens glucocorticoid modulatory element binding protein 2 (GMEB2), mRNA [NM_012384]          | 26205 |
| A_24_P172768 | -1.4 | -2.6 | -1.1 | -3.0  | GMFB  | Homo sapiens glioma maturation factor, beta (GMFB), mRNA [NM_004124]                                | 2764  |

|              |      |      |      |      |       |                                                                                                     |       |
|--------------|------|------|------|------|-------|-----------------------------------------------------------------------------------------------------|-------|
| A_23_P67913  | -2.1 | -1.1 | -1.5 | 1.5  | GMPPA | Homo sapiens GDP-mannose pyrophosphorylase A (GMPPA), transcript variant 1, mRNA [NM_013335]        | 29926 |
| A_24_P277657 | 3.2  | 2.8  | 1.5  | 1.6  | GMPR  | Homo sapiens guanosine monophosphate reductase (GMPR), mRNA [NM_006877]                             | 2766  |
| A_24_P56467  | 1.1  | 1.0  | 2.7  | -3.0 | GMPR2 | Homo sapiens guanosine monophosphate reductase 2 (GMPR2), transcript variant 2, mRNA [NM_001002000] | 51292 |
| A_23_P21033  | -5.3 | 1.2  | -1.7 | -2.8 | GMPS  | Homo sapiens guanine monophosphate synthetase (GMPS), mRNA [NM_003875]                              | 8833  |

|              |      |      |      |      |       |                                                                                                 |       |
|--------------|------|------|------|------|-------|-------------------------------------------------------------------------------------------------|-------|
| A_24_P927886 | 2.2  | 2.5  | 2.1  | 1.7  | GNA11 | Homo sapiens GTP-binding protein alpha 11 (GA11) mRNA, partial cds. [L40630]                    | 2767  |
| A_23_P354270 | 1.1  | -7.1 | -1.1 | 1.1  | GNA12 | Homo sapiens guanine nucleotide binding protein (G protein) alpha 12 (GNA12), mRNA [NM_007353]  | 2768  |
| A_24_P98086  | -1.0 | -1.0 | 2.5  | -1.0 | GNA12 | Homo sapiens guanine nucleotide binding protein (G protein) alpha 12 (GNA12), mRNA [NM_007353]  | 2768  |
| A_24_P150874 | 1.4  | -1.2 | -2.4 | 1.1  | GNA13 | Homo sapiens guanine nucleotide binding protein (G protein), alpha 13 (GNA13), mRNA [NM_006572] | 10672 |

|              |     |      |      |      |       |                                                                                                                                                      |      |
|--------------|-----|------|------|------|-------|------------------------------------------------------------------------------------------------------------------------------------------------------|------|
| A_24_P331128 | 2.0 | 1.7  | 3.8  | -1.1 | GNA15 | Homo sapiens guanine nucleotide binding protein (G protein), alpha 15 (Gq class) (GNA15), mRNA [NM_002068]                                           | 2769 |
| A_23_P122976 | 1.1 | 1.0  | -1.1 | -2.9 | GNAI1 | Homo sapiens guanine nucleotide binding protein (G protein), alpha inhibiting activity polypeptide 1 (GNAI1), mRNA [NM_002069]                       | 2770 |
| A_23_P144113 | 1.5 | -2.2 | 1.2  | -3.3 | GNAI2 | Homo sapiens guanine nucleotide binding protein (G protein), alpha inhibiting activity polypeptide 2 (GNAI2), transcript variant 1, mRNA [NM_002070] | 2771 |

|              |      |      |      |      |      |                                                                                                                                                                   |      |
|--------------|------|------|------|------|------|-------------------------------------------------------------------------------------------------------------------------------------------------------------------|------|
| A_24_P339436 | -4.2 | -1.4 | 1.0  | 1.0  | GNAL | Homo sapiens guanine nucleotide binding protein (G protein), alpha activating activity polypeptide, olfactory type (GNAL), transcript variant 2, mRNA [NM_002071] | 2774 |
| A_23_P38689  | 24.6 | 24.2 | 12.2 | 16.9 | GNAL | Homo sapiens guanine nucleotide binding protein (G protein), alpha activating activity polypeptide, olfactory type (GNAL), transcript variant 2, mRNA [NM_002071] | 2774 |

|              |     |      |      |       |       |                                                                                                                                                      |      |
|--------------|-----|------|------|-------|-------|------------------------------------------------------------------------------------------------------------------------------------------------------|------|
| A_24_P393611 | 3.0 | 1.8  | 1.7  | 1.4   | GNAO1 | Homo sapiens guanine nucleotide binding protein (G protein), alpha activating activity polypeptide O (GNAO1), transcript variant 2, mRNA [NM_138736] | 2775 |
| A_24_P936145 | 1.1 | -1.4 | -1.0 | -28.4 | GNAO1 | Homo sapiens guanine nucleotide binding protein (G protein), alpha activating activity polypeptide O (GNAO1), transcript variant 2, mRNA [NM_138736] | 2775 |
| A_24_P316413 | 4.1 | 5.8  | 4.4  | -1.2  | GNAO1 | Homo sapiens cDNA clone IMAGE:4181241. [BC012202]                                                                                                    | 2775 |

|              |      |      |      |      |       |                                                                                                                                                      |      |
|--------------|------|------|------|------|-------|------------------------------------------------------------------------------------------------------------------------------------------------------|------|
| A_23_P26582  | -1.0 | -2.4 | -1.1 | -1.1 | GNAO1 | Homo sapiens guanine nucleotide binding protein (G protein), alpha activating activity polypeptide O (GNAO1), transcript variant 1, mRNA [NM_020988] | 2775 |
| A_24_P168574 | 1.4  | -1.2 | 1.2  | -2.1 | GNAS  | GNAS complex locus [Source:HGNC Symbol;Acc:4392] [ENST00000481768]                                                                                   | 2778 |
| A_24_P418809 | 1.2  | 2.1  | 1.7  | 1.7  | GNAS  | Homo sapiens GNAS complex locus (GNAS), transcript variant 7, mRNA [NM_001077489]                                                                    | 2778 |



|              |      |      |      |      |       |                                                                                                                                                       |       |
|--------------|------|------|------|------|-------|-------------------------------------------------------------------------------------------------------------------------------------------------------|-------|
| A_24_P168581 | 2.1  | 1.3  | 1.9  | 2.5  | GNAS  | Homo sapiens GNAS complex locus (GNAS), transcript variant 2, mRNA [NM_001077490]                                                                     | 2778  |
| A_24_P320036 | -1.1 | -1.1 | -1.4 | -3.3 | GNAT1 | Homo sapiens guanine nucleotide binding protein (G protein), alpha transducing activity polypeptide 1 (GNAT1), transcript variant 2, mRNA [NM_000172] | 2779  |
| A_23_P218751 | 1.6  | -1.6 | 2.1  | 1.7  | GNB1L | Homo sapiens guanine nucleotide binding protein (G protein), beta polypeptide 1-like (GNB1L), mRNA [NM_053004]                                        | 54584 |

|              |      |      |      |      |       |                                                                                                                               |       |
|--------------|------|------|------|------|-------|-------------------------------------------------------------------------------------------------------------------------------|-------|
| A_23_P76350  | 2.2  | 1.7  | 1.7  | 2.0  | GNB3  | Homo sapiens guanine nucleotide binding protein (G protein), beta polypeptide 3 (GNB3), mRNA [NM_002075]                      | 2784  |
| A_23_P216489 | -1.0 | -1.0 | -2.2 | -1.0 | GNE   | Homo sapiens glucosamine (UDP-N-acetyl)-2-epimerase /N-acetylmannosamine kinase (GNE), transcript variant 2, mRNA [NM_005476] | 10020 |
| A_23_P112260 | 3.3  | 3.3  | 3.4  | 2.2  | GNG10 | Homo sapiens guanine nucleotide binding protein (G protein), gamma 10 (GNG10), transcript variant 1, mRNA [NM_001017998]      | 2790  |

|              |     |     |     |      |      |                                                                                                                     |       |
|--------------|-----|-----|-----|------|------|---------------------------------------------------------------------------------------------------------------------|-------|
| A_32_P208403 | 1.4 | 4.5 | 1.7 | 3.4  | GNG2 | Homo sapiens guanine nucleotide binding protein (G protein), gamma 2 (GNG2), transcript variant 1, mRNA [NM_053064] | 54331 |
| A_23_P32536  | 1.1 | 3.9 | 1.1 | 3.1  | GNG2 | Homo sapiens guanine nucleotide binding protein (G protein), gamma 2 (GNG2), transcript variant 1, mRNA [NM_053064] | 54331 |
| A_23_P335329 | 1.2 | 1.4 | 1.3 | -2.2 | GNG4 | Homo sapiens guanine nucleotide binding protein (G protein), gamma 4 (GNG4), transcript variant 3, mRNA [NM_004485] | 2786  |

|              |     |       |     |      |       |                                                                                                                                  |       |
|--------------|-----|-------|-----|------|-------|----------------------------------------------------------------------------------------------------------------------------------|-------|
| A_23_P153897 | 3.0 | 3.8   | 3.1 | -3.2 | GNG7  | Homo sapiens guanine nucleotide binding protein (G protein), gamma 7 (GNG7), mRNA [NM_052847]                                    | 2788  |
| A_24_P79070  | 1.2 | -46.2 | 1.5 | -1.6 | GNG8  | Homo sapiens guanine nucleotide binding protein (G protein), gamma 8 (GNG8), mRNA [NM_033258]                                    | 94235 |
| A_24_P196665 | 1.9 | -18.0 | 1.9 | 1.0  | GNGT1 | Homo sapiens guanine nucleotide binding protein (G protein), gamma transducin g activity polypeptide 1 (GNGT1), mRNA [NM_021955] | 2792  |

|              |      |      |      |      |       |                                                                                                                         |       |
|--------------|------|------|------|------|-------|-------------------------------------------------------------------------------------------------------------------------|-------|
| A_23_P404965 | -3.3 | 1.1  | 1.1  | 1.0  | GNL1  | Homo sapiens guanine nucleotide binding protein-like 1 (GNL1), mRNA [NM_005275]                                         | 2794  |
| A_23_P34578  | 1.1  | -1.0 | -7.2 | -1.0 | GNL2  | Homo sapiens guanine nucleotide binding protein-like 2 (nucleolar) (GNL2), mRNA [NM_013285]                             | 29889 |
| A_23_P22499  | -1.6 | -1.6 | -1.6 | -2.0 | GNL3L | Homo sapiens guanine nucleotide binding protein-like 3 (nucleolar)-like (GNL3L), transcript variant 2, mRNA [NM_019067] | 54552 |

|              |      |      |      |      |        |                                                                                                                         |       |
|--------------|------|------|------|------|--------|-------------------------------------------------------------------------------------------------------------------------|-------|
| A_24_P100351 | 1.7  | 1.8  | 2.2  | 1.4  | GNL3L  | Homo sapiens guanine nucleotide binding protein-like 3 (nucleolar)-like (GNL3L), transcript variant 2, mRNA [NM_019067] | 54552 |
| A_24_P930927 | -1.3 | -1.1 | -1.2 | -5.6 | GNPTAB | N-acetylglucosamine-1-phosphate transferase, alpha and beta subunits [Source:HGNC Symbol;Acc:29670] [ENST00000552009]   | 79158 |
| A_24_P288979 | 1.5  | -8.3 | 1.0  | -1.2 | GNPTAB | Homo sapiens N-acetylglucosamine-1-phosphate transferase, alpha and beta subunits (GNPTAB), mRNA [NM_024312]            | 79158 |

|              |      |      |     |      |        |                                                                                                                               |       |
|--------------|------|------|-----|------|--------|-------------------------------------------------------------------------------------------------------------------------------|-------|
| A_23_P346265 | 1.2  | -1.9 | 1.8 | -2.7 | GNPTAB | Homo sapiens N-acetylglucosamine-1-phosphate transferase, alpha and beta subunits (GNPTAB), mRNA [NM_024312]                  | 79158 |
| A_23_P14886  | -1.1 | 3.1  | 2.7 | -3.1 | GNPTG  | Homo sapiens N-acetylglucosamine-1-phosphate transferase, gamma subunit (GNPTG), mRNA [NM_032520]                             | 84572 |
| A_23_P254594 | -1.4 | -1.0 | 1.2 | -2.2 | GNRH1  | Homo sapiens gonadotropin-releasing hormone 1 (luteinizing-releasing hormone) (GNRH1), transcript variant 1, mRNA [NM_000825] | 2796  |

|              |      |     |      |      |          |                                                                                                         |       |
|--------------|------|-----|------|------|----------|---------------------------------------------------------------------------------------------------------|-------|
| A_23_P155804 | 1.2  | 1.0 | -3.1 | 1.0  | GNRHR    | Homo sapiens gonadotropin-releasing hormone receptor (GNRHR), transcript variant 2, mRNA [NM_001012763] | 2798  |
| A_23_P13998  | -2.5 | 1.4 | -3.8 | -2.7 | GOLGA2P5 | Homo sapiens golgin A2 pseudogene 5 (GOLGA2P5), transcript variant 1, non-coding RNA [NR_036632]        | 55592 |
| A_23_P98864  | -5.4 | 1.1 | 1.0  | -1.5 | GOLGA3   | Homo sapiens golgin A3 (GOLGA3), transcript variant 1, mRNA [NM_005895]                                 | 2802  |
| A_24_P187706 | 1.0  | 1.0 | -3.8 | 1.0  | GOLGA4   | Homo sapiens golgin A4 (GOLGA4), transcript variant 2, mRNA [NM_002078]                                 | 2803  |



|              |      |      |      |      |          |                                                                        |        |
|--------------|------|------|------|------|----------|------------------------------------------------------------------------|--------|
| A_24_P546375 | -2.3 | 1.9  | 6.6  | 1.7  | GOLGA6A  | Homo sapiens golgin A6 family, member A (GOLGA6A), mRNA [NM_001038640] | 342096 |
| A_23_P106371 | 1.3  | -3.0 | -1.1 | 1.3  | GOLGA6A  | Homo sapiens golgin A6 family, member A (GOLGA6A), mRNA [NM_001038640] | 342096 |
| A_24_P153880 | 1.1  | -8.6 | -1.0 | -1.2 | GOLGA6L9 | Homo sapiens golgin A6 family-like 9 (GOLGA6L9), mRNA [NM_198181]      | 440295 |
| A_32_P231086 | -1.0 | -2.8 | -1.1 | -1.3 | GOLGA6L9 | Homo sapiens golgin A6 family-like 9 (GOLGA6L9), mRNA [NM_198181]      | 440295 |
| A_24_P41079  | 2.1  | 5.3  | 1.1  | 1.1  | GOLGA6L9 | Homo sapiens golgin A6 family-like 9 (GOLGA6L9), mRNA [NM_198181]      | 440295 |

|              |      |      |      |      |         |                                                                                           |           |
|--------------|------|------|------|------|---------|-------------------------------------------------------------------------------------------|-----------|
| A_24_P98277  | -1.7 | -2.4 | -1.7 | -1.1 | GOLGA7  | Homo sapiens golgin A7 (GOLGA7), transcript variant 2, mRNA [NM_001002296]                | 51125     |
| A_32_P85273  | 1.0  | -2.6 | -1.0 | -1.2 | GOLGA8A | Homo sapiens golgin A8 family, member A (GOLGA8A), transcript variant 1, mRNA [NM_181077] | 23015     |
| A_32_P119569 | 1.1  | 1.0  | -2.1 | -1.0 | GOLGA8E | Homo sapiens golgin A8 family, member E (GOLGA8E), non-coding RNA [NR_033350]             | 390535    |
| A_32_P59116  | -1.9 | -1.1 | -2.9 | 2.3  | GOLGA8F | Homo sapiens golgin A8 family, member F (GOLGA8F), non-coding RNA [NR_033351]             | 100132565 |

|              |      |      |      |      |        |                                                                                       |       |
|--------------|------|------|------|------|--------|---------------------------------------------------------------------------------------|-------|
| A_23_P135787 | -8.6 | -1.0 | -1.2 | -1.2 | GOLGB1 | Homo sapiens golgin B1 (GOLGB1), mRNA [NM_004487]                                     | 2804  |
| A_24_P927500 | -1.0 | -4.4 | -1.0 | -1.0 | GOLM1  | Homo sapiens cDNA FLJ23608 fis, clone ADKA01790. [AK074188]                           | 51280 |
| A_24_P394865 | 1.1  | 1.1  | 1.1  | 4.5  | GOLM1  | Homo sapiens golgi membrane protein 1 (GOLM1), transcript variant 1, mRNA [NM_016548] | 51280 |
| A_23_P146512 | 3.4  | 2.3  | 3.2  | 3.9  | GOLM1  | Homo sapiens golgi membrane protein 1 (GOLM1), transcript variant 1, mRNA [NM_016548] | 51280 |

|              |       |      |      |      |        |                                                                                                                   |       |
|--------------|-------|------|------|------|--------|-------------------------------------------------------------------------------------------------------------------|-------|
| A_24_P321511 | -14.7 | -1.8 | -1.4 | -1.3 | GOLT1B | Homo sapiens golgi transport 1B (GOLT1B), mRNA [NM_016072]                                                        | 51026 |
| A_24_P276853 | 5.4   | 6.4  | 4.8  | 3.1  | GON4L  | Homo sapiens gon-4-like (C. elegans) (GON4L), transcript variant 1, mRNA [NM_001037533]                           | 54856 |
| A_23_P336040 | 1.0   | -1.0 | -1.1 | -3.0 | GOPC   | Homo sapiens golgi-associated PDZ and coiled-coil motif containing (GOPC), transcript variant 1, mRNA [NM_020399] | 57120 |
| A_23_P58877  | -2.4  | -3.1 | -2.6 | -5.2 | GOPC   | Homo sapiens golgi-associated PDZ and coiled-coil motif containing (GOPC), transcript variant 1, mRNA [NM_020399] | 57120 |

|              |      |      |      |      |       |                                                                                                   |       |
|--------------|------|------|------|------|-------|---------------------------------------------------------------------------------------------------|-------|
| A_23_P368145 | -2.3 | 1.7  | -1.4 | -1.1 | GORAB | Homo sapiens golgin, RAB6-interacting (GORAB), transcript variant 1, mRNA [NM_152281]             | 92344 |
| A_24_P169462 | -2.4 | -2.3 | -1.0 | -1.1 | GOSR1 | Homo sapiens golgi SNAP receptor complex member 1 (GOSR1), transcript variant 1, mRNA [NM_004871] | 9527  |
| A_23_P311608 | -2.1 | -1.0 | -1.1 | -1.0 | GOSR2 | Homo sapiens golgi SNAP receptor complex member 2 (GOSR2), transcript variant B, mRNA [NM_054022] | 9570  |

|              |      |      |      |      |       |                                                                                                                   |      |
|--------------|------|------|------|------|-------|-------------------------------------------------------------------------------------------------------------------|------|
| A_23_P207719 | 1.2  | 1.5  | -2.5 | 1.1  | GOSR2 | Homo sapiens golgi SNAP receptor complex member 2 (GOSR2), transcript variant A, mRNA [NM_004287]                 | 9570 |
| A_24_P108242 | -1.7 | -3.6 | -1.1 | -1.1 | GOSR2 | Homo sapiens golgi SNAP receptor complex member 2 (GOSR2), transcript variant A, mRNA [NM_004287]                 | 9570 |
| A_23_P63825  | -2.3 | -1.7 | -1.2 | 1.3  | GOT1  | Homo sapiens glutamic-oxaloacetic transaminase 1, soluble (aspartate aminotransferase 1) (GOT1), mRNA [NM_002079] | 2805 |

|              |      |      |      |     |        |                                                                                                                                                                      |        |
|--------------|------|------|------|-----|--------|----------------------------------------------------------------------------------------------------------------------------------------------------------------------|--------|
| A_24_P808720 | -1.4 | -2.5 | -2.4 | 1.9 | GOT1L1 | Homo sapiens glutamic-oxaloacetic transaminase 1-like 1 (GOT1L1), mRNA [NM_152413]                                                                                   | 137362 |
| A_23_P106575 | -4.9 | 1.6  | 1.6  | 1.6 | GOT2   | Homo sapiens glutamic-oxaloacetic transaminase 2, mitochondrial (aspartate aminotransferase 2) (GOT2), nuclear gene encoding mitochondrial protein, mRNA [NM_002080] | 2806   |

|              |      |      |      |      |       |                                                                                                                                                                      |      |
|--------------|------|------|------|------|-------|----------------------------------------------------------------------------------------------------------------------------------------------------------------------|------|
| A_24_P692198 | 1.3  | 1.1  | -2.5 | 1.1  | GOT2  | Homo sapiens glutamic-oxaloacetic transaminase 2, mitochondrial (aspartate aminotransferase 2) (GOT2), nuclear gene encoding mitochondrial protein, mRNA [NM_002080] | 2806 |
| A_24_P270829 | 1.0  | -1.8 | 1.3  | -3.1 | GP1BA | Homo sapiens glycoprotein Ib (platelet), alpha polypeptide (GP1BA), mRNA [NM_000173]                                                                                 | 2811 |
| A_24_P190007 | -6.9 | -1.5 | -1.2 | -1.5 | GP2   | Homo sapiens glycoprotein 2 (zymogen granule membrane) (GP2), transcript variant 1, mRNA [NM_001007240]                                                              | 2813 |



|              |      |      |      |      |       |                                                                                                                                                              |       |
|--------------|------|------|------|------|-------|--------------------------------------------------------------------------------------------------------------------------------------------------------------|-------|
| A_23_P27784  | 4.0  | 4.0  | 4.4  | 2.4  | GP6   | Homo sapiens glycoprotein VI (platelet) (GP6), transcript variant 2, mRNA [NM_016363]                                                                        | 51206 |
| A_24_P319374 | -1.9 | -2.0 | -1.1 | -1.0 | GPA33 | Homo sapiens glycoprotein A33 (transmembrane) (GPA33), mRNA [NM_005814]                                                                                      | 10223 |
| A_23_P104237 | 1.0  | 1.0  | 1.0  | 2.0  | GPAM  | Homo sapiens glycerol-3-phosphate acyltransferase, mitochondrial (GPAM), nuclear gene encoding mitochondrial protein, transcript variant 2, mRNA [NM_020918] | 57678 |

|              |      |      |      |      |        |                                                                                                                                           |        |
|--------------|------|------|------|------|--------|-------------------------------------------------------------------------------------------------------------------------------------------|--------|
| A_23_P68240  | -2.1 | 2.2  | -1.7 | 1.8  | GPAT2  | Homo sapiens glycerol-3-phosphate acyltransferase 2, mitochondrial (GPAT2), nuclear gene encoding mitochondrial protein, mRNA [NM_207328] | 150763 |
| A_23_P400378 | 3.8  | 3.0  | 1.6  | 3.8  | GPBAR1 | Homo sapiens G protein-coupled bile acid receptor 1 (GPBAR1), transcript variant 1, mRNA [NM_001077191]                                   | 151306 |
| A_23_P30395  | 1.2  | -6.5 | 1.0  | -1.2 | GPBP1  | Homo sapiens GC-rich promoter binding protein 1 (GPBP1), transcript variant 1, mRNA [NM_022913]                                           | 65056  |

|              |      |      |      |       |         |                                                                                    |        |
|--------------|------|------|------|-------|---------|------------------------------------------------------------------------------------|--------|
| A_23_P593    | -3.1 | -1.9 | -9.2 | -1.9  | GPBP1L1 | Homo sapiens GC-rich promoter binding protein 1-like 1 (GPBP1L1), mRNA [NM_021639] | 60313  |
| A_23_P209904 | 2.0  | 1.5  | 2.3  | 1.3   | GPC1    | Homo sapiens glypican 1 (GPC1), mRNA [NM_002081]                                   | 2817   |
| A_23_P251795 | 1.1  | 1.1  | 1.1  | -3.6  | GPC2    | Homo sapiens glypican 2 (GPC2), mRNA [NM_152742]                                   | 221914 |
| A_23_P435407 | -3.2 | 1.8  | 1.7  | 1.3   | GPC4    | Homo sapiens glypican 4 (GPC4), mRNA [NM_001448]                                   | 2239   |
| A_23_P112874 | -5.4 | -1.7 | -1.9 | -94.2 | GPC5    | Homo sapiens glypican 5 (GPC5), mRNA [NM_004466]                                   | 2262   |
| A_23_P371682 | 2.7  | 4.8  | 2.4  | 2.4   | GPC6    | Homo sapiens glypican 6 (GPC6), mRNA [NM_005708]                                   | 10082  |

|              |      |       |     |      |        |                                                                                                              |       |
|--------------|------|-------|-----|------|--------|--------------------------------------------------------------------------------------------------------------|-------|
| A_32_P97169  | 1.7  | 1.7   | 2.4 | -1.3 | GPC6   | Homo sapiens glypican 6 (GPC6), mRNA [NM_005708]                                                             | 10082 |
| A_23_P353704 | 1.0  | -38.7 | 1.5 | 1.0  | GPCPD1 | Homo sapiens glycerophosphocholine phosphodiesterase GDE1 homolog (S. cerevisiae) (GPCPD1), mRNA [NM_019593] | 56261 |
| A_24_P31671  | -5.6 | 1.2   | 1.2 | 1.0  | GPCPD1 | Homo sapiens glycerophosphocholine phosphodiesterase GDE1 homolog (S. cerevisiae) (GPCPD1), mRNA [NM_019593] | 56261 |

|              |     |     |      |      |       |                                                                                      |       |
|--------------|-----|-----|------|------|-------|--------------------------------------------------------------------------------------|-------|
| A_23_P413721 | 2.6 | 3.1 | -1.1 | -1.7 | GPD1  | Homo sapiens glycerol-3-phosphate dehydrogenase 1 (soluble) (GPD1), mRNA [NM_005276] | 2819  |
| A_23_P162660 | 1.9 | 2.0 | -4.0 | 1.7  | GPD1  | Homo sapiens glycerol-3-phosphate dehydrogenase 1 (soluble) (GPD1), mRNA [NM_005276] | 2819  |
| A_23_P204736 | 1.3 | 3.0 | 2.2  | 2.2  | GPD1  | Homo sapiens glycerol-3-phosphate dehydrogenase 1 (soluble) (GPD1), mRNA [NM_005276] | 2819  |
| A_23_P318284 | 2.3 | 1.5 | -1.5 | -1.2 | GPD1L | Homo sapiens glycerol-3-phosphate dehydrogenase 1-like (GPD1L), mRNA [NM_015141]     | 23171 |

|              |      |      |      |      |       |                                                                                                                     |        |
|--------------|------|------|------|------|-------|---------------------------------------------------------------------------------------------------------------------|--------|
| A_23_P47181  | -2.4 | -1.6 | -2.3 | -2.3 | GPHA2 | Homo sapiens glycoprotein hormone alpha 2 (GPHA2), mRNA [NM_130769]                                                 | 170589 |
| A_23_P336678 | -1.4 | -1.9 | 1.9  | -4.0 | GPHB5 | Homo sapiens glycoprotein hormone beta 5 (GPHB5), mRNA [NM_145171]                                                  | 122876 |
| A_23_P156928 | 1.1  | 1.0  | -1.9 | -7.8 | GPLD1 | Homo sapiens glycosylphosphatidylinositol specific phospholipase D1 (GPLD1), transcript variant 1, mRNA [NM_001503] | 2822   |
| A_23_P121545 | 7.5  | 7.3  | 7.1  | 6.9  | GPM6A | Homo sapiens glycoprotein M6A (GPM6A), transcript variant 2, mRNA [NM_201591]                                       | 2823   |

|              |       |      |      |      |        |                                                                                                          |       |
|--------------|-------|------|------|------|--------|----------------------------------------------------------------------------------------------------------|-------|
| A_24_P933908 | -13.0 | -1.1 | -1.3 | -1.3 | GPNMB  | Homo sapiens glycoprotein (transmembrane) nmb, mRNA (cDNA clone IMAGE:3345861), complete cds. [BC011595] | 10457 |
| A_23_P134426 | -2.2  | 1.0  | 1.1  | 1.0  | GPNMB  | Homo sapiens glycoprotein (transmembrane) nmb (GPNMB), transcript variant 1, mRNA [NM_001005340]         | 10457 |
| A_24_P295379 | -4.2  | 1.0  | -1.2 | 1.1  | GPR107 | Homo sapiens G protein-coupled receptor 107 (GPR107), transcript variant 3, mRNA [NM_020960]             | 57720 |

|              |      |      |       |      |        |                                                                                              |        |
|--------------|------|------|-------|------|--------|----------------------------------------------------------------------------------------------|--------|
| A_24_P183544 | 1.3  | -1.2 | -1.2  | 3.2  | GPR110 | G protein-coupled receptor 110 [Source:HGNC Symbol;Acc:18990] [ENST00000371253]              | 266977 |
| A_23_P214267 | -1.0 | -1.0 | -11.5 | -1.1 | GPR110 | Homo sapiens G protein-coupled receptor 110 (GPR110), transcript variant 1, mRNA [NM_153840] | 266977 |
| A_23_P167872 | -5.4 | -2.9 | -3.0  | -3.0 | GPR111 | Homo sapiens G protein-coupled receptor 111 (GPR111), mRNA [NM_153839]                       | 222611 |
| A_23_P312901 | 2.4  | 2.3  | 1.8   | 4.6  | GPR112 | Homo sapiens G protein-coupled receptor 112 (GPR112), mRNA [NM_153834]                       | 139378 |



|              |      |      |      |      |        |                                                                                              |        |
|--------------|------|------|------|------|--------|----------------------------------------------------------------------------------------------|--------|
| A_24_P85881  | -2.6 | -1.3 | -3.7 | -1.5 | GPR113 | Homo sapiens G protein-coupled receptor 113 (GPR113), transcript variant 3, mRNA [NM_153835] | 165082 |
| A_23_P206290 | -5.7 | 1.0  | 1.4  | 1.8  | GPR114 | Homo sapiens G protein-coupled receptor 114 (GPR114), mRNA [NM_153837]                       | 221188 |
| A_23_P206293 | 1.3  | -1.6 | -4.4 | -1.8 | GPR114 | Homo sapiens G protein-coupled receptor 114 (GPR114), mRNA [NM_153837]                       | 221188 |
| A_24_P337671 | 3.3  | 3.3  | -2.4 | 2.9  | GPR115 | Homo sapiens G protein-coupled receptor 115 (GPR115), mRNA [NM_153838]                       | 221393 |

|              |     |      |      |      |        |                                                                           |        |
|--------------|-----|------|------|------|--------|---------------------------------------------------------------------------|--------|
| A_23_P21425  | 1.1 | 1.1  | -2.1 | -1.1 | GPR119 | Homo sapiens G protein-coupled receptor 119 (GPR119), mRNA [NM_178471]    | 139760 |
| A_23_P48320  | 3.3 | 5.5  | 3.8  | 1.9  | GPR12  | Homo sapiens G protein-coupled receptor 12 (GPR12), mRNA [NM_005288]      | 2835   |
| A_23_P327605 | 1.5 | -4.8 | -1.2 | -1.2 | GPR123 | Homo sapiens G protein-coupled receptor 123 (GPR123), mRNA [NM_001083909] | 84435  |
| A_23_P43276  | 5.4 | 3.4  | 3.8  | 3.8  | GPR124 | Homo sapiens G protein-coupled receptor 124 (GPR124), mRNA [NM_032777]    | 25960  |

|              |       |      |      |      |        |                                                                                               |       |
|--------------|-------|------|------|------|--------|-----------------------------------------------------------------------------------------------|-------|
| A_24_P942945 | -3.4  | -5.2 | 1.0  | -1.0 | GPR126 | Homo sapiens G protein-coupled receptor 126 (GPR126), transcript variant a1, mRNA [NM_020455] | 57211 |
| A_24_P201994 | -1.7  | 1.8  | -2.1 | -2.2 | GPR132 | Homo sapiens G protein-coupled receptor 132 (GPR132), mRNA [NM_013345]                        | 29933 |
| A_24_P344045 | 9.1   | 5.2  | 4.8  | 5.7  | GPR135 | Homo sapiens G protein-coupled receptor 135 (GPR135), mRNA [NM_022571]                        | 64582 |
| A_23_P205575 | -18.7 | -3.2 | -1.1 | -1.3 | GPR135 | Homo sapiens G protein-coupled receptor 135 (GPR135), mRNA [NM_022571]                        | 64582 |

|              |      |      |      |      |        |                                                                                              |        |
|--------------|------|------|------|------|--------|----------------------------------------------------------------------------------------------|--------|
| A_23_P410736 | 5.2  | 5.2  | 4.3  | 4.7  | GPR135 | Homo sapiens G protein-coupled receptor 135 (GPR135), mRNA [NM_022571]                       | 64582  |
| A_23_P416686 | 3.4  | -1.4 | 2.5  | 2.1  | GPR137 | Homo sapiens G protein-coupled receptor 137 (GPR137), transcript variant 3, mRNA [NM_020155] | 56834  |
| A_23_P49559  | -2.1 | -3.1 | -2.0 | -4.3 | GPR142 | Homo sapiens G protein-coupled receptor 142 (GPR142), mRNA [NM_181790]                       | 350383 |
| A_23_P45560  | -1.2 | 2.3  | 1.6  | -1.9 | GPR143 | Homo sapiens G protein-coupled receptor 143 (GPR143), mRNA [NM_000273]                       | 4935   |

|              |      |      |      |      |        |                                                                           |        |
|--------------|------|------|------|------|--------|---------------------------------------------------------------------------|--------|
| A_24_P74896  | -1.3 | -1.2 | -2.1 | -2.1 | GPR144 | Homo sapiens G protein-coupled receptor 144 (GPR144), mRNA [NM_001161808] | 347088 |
| A_23_P20035  | -1.1 | -2.4 | -1.3 | 1.1  | GPR146 | Homo sapiens G protein-coupled receptor 146 (GPR146), mRNA [NM_138445]    | 115330 |
| A_24_P332218 | 1.2  | -2.5 | -1.7 | -1.1 | GPR149 | Homo sapiens G protein-coupled receptor 149 (GPR149), mRNA [NM_001038705] | 344758 |
| A_23_P6943   | 2.2  | -1.0 | 1.2  | 1.3  | GPR15  | Homo sapiens G protein-coupled receptor 15 (GPR15), mRNA [NM_005290]      | 2838   |

|              |      |      |      |      |        |                                                                                              |        |
|--------------|------|------|------|------|--------|----------------------------------------------------------------------------------------------|--------|
| A_23_P213527 | 1.2  | 1.0  | -8.1 | 1.0  | GPR150 | G protein-coupled receptor 150 [Source:HGNC Symbol;Acc:23628] [ENST00000380007]              | 285601 |
| A_23_P92275  | -1.0 | -2.5 | -3.7 | -1.9 | GPR156 | Homo sapiens G protein-coupled receptor 156 (GPR156), transcript variant 1, mRNA [NM_153002] | 165829 |
| A_24_P757255 | 1.6  | 1.5  | 1.5  | -6.1 | GPR157 | G protein-coupled receptor 157 [Source:HGNC Symbol;Acc:23687] [ENST00000377411]              | 80045  |
| A_24_P71280  | 4.7  | 4.1  | 5.3  | 1.6  | GPR157 | Homo sapiens cDNA FLJ12132 fis, clone MAMMA1000277. [AK022194]                               | 80045  |

|              |      |      |      |      |        |                                                                                              |       |
|--------------|------|------|------|------|--------|----------------------------------------------------------------------------------------------|-------|
| A_24_P349117 | 1.0  | -1.0 | -3.7 | -1.8 | GPR158 | Homo sapiens G protein-coupled receptor 158 (GPR158), mRNA [NM_020752]                       | 57512 |
| A_23_P167005 | 1.2  | 1.2  | 1.2  | -6.0 | GPR160 | Homo sapiens G protein-coupled receptor 160 (GPR160), mRNA [NM_014373]                       | 26996 |
| A_23_P303455 | -1.0 | -1.1 | -2.1 | -2.7 | GPR161 | Homo sapiens G protein-coupled receptor 161 (GPR161), transcript variant 2, mRNA [NM_153832] | 23432 |
| A_23_P103532 | 3.1  | 2.0  | 2.1  | 1.7  | GPR161 | Homo sapiens G protein-coupled receptor 161 (GPR161), transcript variant 2, mRNA [NM_153832] | 23432 |

|              |      |      |      |      |         |                                                                                                |       |
|--------------|------|------|------|------|---------|------------------------------------------------------------------------------------------------|-------|
| A_24_P287392 | -2.7 | -1.0 | -1.0 | -1.0 | GPR162  | Homo sapiens G protein-coupled receptor 162 (GPR162), transcript variant A-2, mRNA [NM_019858] | 27239 |
| A_23_P16963  | -1.3 | -3.6 | -3.8 | -1.6 | GPR17   | Homo sapiens G protein-coupled receptor 17 (GPR17), transcript variant 2, mRNA [NM_005291]     | 2840  |
| A_23_P15692  | 1.1  | 1.5  | -9.0 | 1.1  | GPR172B | Homo sapiens G protein-coupled receptor 172B (GPR172B), transcript variant 2, mRNA [NM_017986] | 55065 |
| A_23_P346291 | 1.3  | 1.8  | 1.7  | 2.7  | GPR173  | Homo sapiens G protein-coupled receptor 173 (GPR173), mRNA [NM_018969]                         | 54328 |



|              |       |      |     |      |        |                                                                                            |       |
|--------------|-------|------|-----|------|--------|--------------------------------------------------------------------------------------------|-------|
| A_23_P37676  | 3.3   | 4.8  | 3.2 | 5.7  | GPR176 | Homo sapiens G protein-coupled receptor 176 (GPR176), mRNA [NM_007223]                     | 11245 |
| A_23_P14165  | -1.2  | -1.6 | 1.2 | -2.3 | GPR18  | Homo sapiens G protein-coupled receptor 18 (GPR18), transcript variant 1, mRNA [NM_005292] | 2841  |
| A_23_P99285  | -19.9 | -1.2 | 1.2 | 2.0  | GPR19  | Homo sapiens G protein-coupled receptor 19 (GPR19), mRNA [NM_006143]                       | 2842  |
| A_23_P159237 | -1.5  | 1.8  | 2.4 | -1.1 | GPR20  | Homo sapiens G protein-coupled receptor 20 (GPR20), mRNA [NM_005293]                       | 2843  |

|              |      |      |      |      |       |                                                                      |      |
|--------------|------|------|------|------|-------|----------------------------------------------------------------------|------|
| A_23_P135219 | -2.1 | -1.7 | -1.9 | -1.7 | GPR21 | Homo sapiens G protein-coupled receptor 21 (GPR21), mRNA [NM_005294] | 2844 |
| A_23_P20172  | -1.0 | -1.0 | -3.7 | 1.0  | GPR22 | Homo sapiens G protein-coupled receptor 22 (GPR22), mRNA [NM_005295] | 2845 |
| A_23_P35000  | 1.1  | 1.8  | 2.1  | 2.2  | GPR3  | Homo sapiens G protein-coupled receptor 3 (GPR3), mRNA [NM_005281]   | 2827 |
| A_23_P42112  | -1.2 | -8.1 | -1.2 | -2.1 | GPR31 | Homo sapiens G protein-coupled receptor 31 (GPR31), mRNA [NM_005299] | 2853 |

|              |      |      |      |      |         |                                                                                               |      |
|--------------|------|------|------|------|---------|-----------------------------------------------------------------------------------------------|------|
| A_23_P154245 | 1.1  | 1.0  | 2.0  | -2.1 | GPR35   | Homo sapiens G protein-coupled receptor 35 (GPR35), transcript variant 1, mRNA [NM_005301]    | 2859 |
| A_23_P305550 | 1.6  | 2.2  | -1.0 | 1.4  | GPR35   | Homo sapiens G protein-coupled receptor 35 (GPR35), transcript variant 3, mRNA [NM_001195382] | 2859 |
| A_24_P145633 | -1.1 | -2.8 | 1.0  | -2.6 | GPR37L1 | Homo sapiens G protein-coupled receptor 37 like 1 (GPR37L1), mRNA [NM_004767]                 | 9283 |
| A_23_P206280 | 1.0  | 1.0  | -4.1 | 1.0  | GPR56   | Homo sapiens G protein-coupled receptor 56 (GPR56), transcript variant 3, mRNA [NM_201525]    | 9289 |

|              |      |      |      |      |       |                                                                                               |       |
|--------------|------|------|------|------|-------|-----------------------------------------------------------------------------------------------|-------|
| A_23_P206284 | -1.7 | -1.1 | 1.1  | -5.0 | GPR56 | Homo sapiens G protein-coupled receptor 56 (GPR56), transcript variant 3, mRNA [NM_201525]    | 9289  |
| A_23_P156919 | 1.4  | 3.5  | 2.5  | 1.7  | GPR6  | Homo sapiens G protein-coupled receptor 6 (GPR6), mRNA [NM_005284]                            | 2830  |
| A_23_P326303 | -2.6 | -1.5 | 3.2  | 1.2  | GPR61 | Homo sapiens G protein-coupled receptor 61 (GPR61), mRNA [NM_031936]                          | 83873 |
| A_23_P253692 | 1.0  | 1.0  | -3.1 | 1.0  | GPR64 | Homo sapiens G protein-coupled receptor 64 (GPR64), transcript variant 1, mRNA [NM_001079858] | 10149 |

|              |      |      |      |      |       |                                                                                            |       |
|--------------|------|------|------|------|-------|--------------------------------------------------------------------------------------------|-------|
| A_23_P54243  | -1.4 | -3.4 | -1.4 | 1.7  | GPR68 | Homo sapiens G protein-coupled receptor 68 (GPR68), transcript variant 2, mRNA [NM_003485] | 8111  |
| A_24_P931443 | -6.3 | -1.0 | 1.0  | 1.0  | GPR68 | Homo sapiens G protein-coupled receptor 68 (GPR68), transcript variant 2, mRNA [NM_003485] | 8111  |
| A_23_P69652  | -1.1 | 1.5  | -1.1 | -2.1 | GPR78 | Homo sapiens G protein-coupled receptor 78 (GPR78), transcript variant 1, mRNA [NM_080819] | 27201 |
| A_24_P280148 | 1.0  | -1.5 | -2.9 | -2.2 | GPR82 | Homo sapiens G protein-coupled receptor 82 (GPR82), mRNA [NM_080817]                       | 27197 |

|              |      |      |      |      |        |                                                                                                   |        |
|--------------|------|------|------|------|--------|---------------------------------------------------------------------------------------------------|--------|
| A_23_P215687 | 1.3  | -2.6 | -2.1 | -1.0 | GPR85  | Homo sapiens G protein-coupled receptor 85 (GPR85), transcript variant 2, mRNA [NM_018970]        | 54329  |
| A_23_P149749 | 1.5  | -3.0 | 1.5  | -1.1 | GPR88  | Homo sapiens strg mRNA for striatum-specific G protein-coupled receptor, complete cds. [AB042410] | 54112  |
| A_23_P140760 | -1.0 | 2.1  | -1.0 | -2.5 | GPR97  | Homo sapiens G protein-coupled receptor 97 (GPR97), mRNA [NM_170776]                              | 222487 |
| A_23_P36831  | 1.0  | -1.1 | -1.1 | -3.6 | GPRC5A | Homo sapiens G protein-coupled receptor, family C, group 5, member A (GPRC5A), mRNA [NM_003979]   | 9052   |

|              |      |      |      |      |        |                                                                                                                       |       |
|--------------|------|------|------|------|--------|-----------------------------------------------------------------------------------------------------------------------|-------|
| A_23_P346670 | -3.0 | -2.8 | -1.5 | -1.8 | GPRC5C | G protein-coupled receptor, family C, group 5, member C [Source:HGNC Symbol;Acc:13309] [ENST00000392628]              | 55890 |
| A_32_P109029 | -1.0 | -5.6 | -1.1 | -1.0 | GPRC5C | Homo sapiens G protein-coupled receptor, family C, group 5, member C (GPRC5C), transcript variant 1, mRNA [NM_022036] | 55890 |
| A_23_P340296 | 2.8  | 2.1  | 2.0  | 1.3  | GPSM1  | Homo sapiens G-protein signaling modulator 1 (GPSM1), transcript variant 2, mRNA [NM_015597]                          | 26086 |

|              |      |      |      |      |      |                                                                                                                        |        |
|--------------|------|------|------|------|------|------------------------------------------------------------------------------------------------------------------------|--------|
| A_23_P250671 | -2.1 | -1.7 | -1.3 | -1.4 | GPX1 | Homo sapiens glutathione peroxidase 1 (GPX1), transcript variant 2, mRNA [NM_201397]                                   | 2876   |
| A_23_P28075  | -3.0 | 1.0  | 2.1  | 1.0  | GPX4 | Homo sapiens glutathione peroxidase 4 (phospholipid hydroperoxidase) (GPX4), transcript variant 3, mRNA [NM_001039848] | 2879   |
| A_24_P109111 | -2.2 | -1.1 | -1.2 | -1.3 | GPX6 | Homo sapiens glutathione peroxidase 6 (olfactory) (GPX6), mRNA [NM_182701]                                             | 257202 |



|              |      |      |      |      |         |                                                                                          |       |
|--------------|------|------|------|------|---------|------------------------------------------------------------------------------------------|-------|
| A_24_P418816 | -4.4 | -4.5 | -2.5 | -1.9 | GPX7    | Homo sapiens glutathione peroxidase 7 (GPX7), mRNA [NM_015696]                           | 2882  |
| A_23_P73972  | 1.0  | -2.0 | -1.0 | -1.1 | GPX7    | Homo sapiens glutathione peroxidase 7 (GPX7), mRNA [NM_015696]                           | 2882  |
| A_23_P56213  | 1.8  | 2.3  | 1.5  | 1.1  | GRAMD1A | Homo sapiens GRAM domain containing 1A (GRAMD1A), transcript variant 1, mRNA [NM_020895] | 57655 |
| A_23_P49638  | 4.4  | 4.9  | 3.0  | 2.6  | GRAP    | Homo sapiens GRB2-related adaptor protein (GRAP), mRNA [NM_006613]                       | 10750 |

|              |      |      |      |      |       |                                                                                                         |      |
|--------------|------|------|------|------|-------|---------------------------------------------------------------------------------------------------------|------|
| A_24_P10884  | -1.0 | -1.6 | -2.1 | 1.2  | GRAP2 | Homo sapiens GRB2-related adaptor protein 2 (GRAP2), mRNA [NM_004810]                                   | 9402 |
| A_23_P143720 | 1.1  | 1.0  | -6.3 | -1.0 | GRAP2 | Homo sapiens GRB2-related adaptor protein 2 (GRAP2), mRNA [NM_004810]                                   | 9402 |
| A_23_P122863 | 1.0  | -2.1 | 1.0  | 1.0  | GRB10 | Homo sapiens growth factor receptor-bound protein 10 (GRB10), transcript variant 4, mRNA [NM_001001555] | 2887 |
| A_24_P407717 | 1.5  | -6.6 | -1.1 | 1.0  | GRB2  | Homo sapiens growth factor receptor-bound protein 2 (GRB2), transcript variant 1, mRNA [NM_002086]      | 2885 |

|              |      |     |      |      |        |                                                                                                    |       |
|--------------|------|-----|------|------|--------|----------------------------------------------------------------------------------------------------|-------|
| A_23_P163992 | 2.6  | 2.3 | 2.3  | -1.0 | GRB7   | Homo sapiens growth factor receptor-bound protein 7 (GRB7), transcript variant 1, mRNA [NM_005310] | 2886  |
| A_23_P119040 | -2.5 | 1.2 | -1.2 | 1.0  | GREB1L | Homo sapiens growth regulation by estrogen in breast cancer-like (GREB1L), mRNA [NM_001142966]     | 80000 |
| A_23_P97181  | 1.1  | 1.3 | 1.1  | -2.3 | GREM2  | Homo sapiens gremlin 2 (GREM2), mRNA [NM_022469]                                                   | 64388 |
| A_23_P52067  | 3.8  | 2.0 | 2.4  | -1.4 | GRHL3  | Homo sapiens grainyhead-like 3 (Drosophila) (GRHL3), transcript variant 2, mRNA [NM_198173]        | 57822 |

|              |      |      |      |      |       |                                                                                                     |      |
|--------------|------|------|------|------|-------|-----------------------------------------------------------------------------------------------------|------|
| A_23_P60225  | -2.1 | -8.9 | -1.7 | -1.3 | GRHPR | Homo sapiens glyoxylate reductase/hydroxypyruvate reductase (GRHPR), mRNA [NM_012203]               | 9380 |
| A_32_P177897 | 1.1  | -2.3 | 1.1  | 1.0  | GRIA3 | Homo sapiens glutamate receptor, ionotropic, AMPA 3 (GRIA3), transcript variant 2, mRNA [NM_000828] | 2892 |
| A_23_P32847  | 3.0  | 2.5  | 2.6  | 2.2  | GRID2 | Homo sapiens glutamate receptor, ionotropic, delta 2 (GRID2), mRNA [NM_001510]                      | 2895 |
| A_32_P229221 | -1.5 | -8.1 | 1.6  | 1.2  | GRID2 | Homo sapiens glutamate receptor, ionotropic, delta 2 (GRID2), mRNA [NM_001510]                      | 2895 |

|              |      |      |      |      |       |                                                                                                        |      |
|--------------|------|------|------|------|-------|--------------------------------------------------------------------------------------------------------|------|
| A_32_P115796 | -6.3 | 1.3  | -1.5 | -1.3 | GRIK2 | Homo sapiens glutamate receptor, ionotropic, kainate 2 (GRIK2), transcript variant 1, mRNA [NM_021956] | 2898 |
| A_23_P149084 | 5.0  | 6.1  | -6.5 | -1.7 | GRIK3 | Homo sapiens glutamate receptor, ionotropic, kainate 3 (GRIK3), mRNA [NM_000831]                       | 2899 |
| A_24_P870799 | 23.5 | 23.8 | 22.5 | 14.6 | GRIK3 | Homo sapiens glutamate receptor, ionotropic, kainate 3 (GRIK3), mRNA [NM_000831]                       | 2899 |
| A_23_P16063  | 1.5  | -3.1 | 1.2  | 1.3  | GRIK5 | Homo sapiens glutamate receptor, ionotropic, kainate 5 (GRIK5), mRNA [NM_002088]                       | 2901 |

|              |      |      |     |      |        |                                                                                                                         |      |
|--------------|------|------|-----|------|--------|-------------------------------------------------------------------------------------------------------------------------|------|
| A_23_P96072  | 3.8  | 4.0  | 2.3 | 3.1  | GRIN1  | Homo sapiens glutamate receptor, ionotropic, N-methyl D-aspartate 1 (GRIN1), transcript variant NR1-3, mRNA [NM_007327] | 2902 |
| A_24_P381844 | -5.6 | -1.6 | 1.4 | -1.5 | GRIN2A | Homo sapiens glutamate receptor, ionotropic, N-methyl D-aspartate 2A (GRIN2A), transcript variant 2, mRNA [NM_000833]   | 2903 |
| A_24_P358628 | 1.1  | -2.8 | 1.0 | 1.1  | GRIN2A | Homo sapiens glutamate receptor, ionotropic, N-methyl D-aspartate 2A (GRIN2A), transcript variant 2, mRNA [NM_000833]   | 2903 |

|              |     |     |      |     |        |                                                                                                                                                            |        |
|--------------|-----|-----|------|-----|--------|------------------------------------------------------------------------------------------------------------------------------------------------------------|--------|
| A_23_P108180 | 2.4 | 4.0 | -1.4 | 1.9 | GRIN3B | Homo sapiens glutamate receptor, ionotropic, N-methyl-D-aspartate 3B (GRIN3B), mRNA [NM_138690]                                                            | 116444 |
| A_23_P316960 | 2.6 | 3.3 | -1.1 | 1.9 | GRINA  | Homo sapiens glutamate receptor, ionotropic, N-methyl D-aspartate-associated protein 1 (glutamate binding) (GRINA), transcript variant 1, mRNA [NM_000837] | 2907   |
| A_32_P380675 | 2.3 | 2.2 | 2.1  | 1.7 | GRIP2  | Homo sapiens glutamate receptor interacting protein 2 (GRIP2), mRNA [NM_001080423]                                                                         | 80852  |

|              |      |      |       |      |      |                                                                                                 |      |
|--------------|------|------|-------|------|------|-------------------------------------------------------------------------------------------------|------|
| A_23_P313542 | -1.2 | -1.6 | -10.9 | -2.4 | GRK1 | Homo sapiens G protein-coupled receptor kinase 1 (GRK1), mRNA [NM_002929]                       | 6011 |
| A_23_P257256 | -3.3 | 1.7  | 1.4   | 1.1  | GRK6 | Homo sapiens G protein-coupled receptor kinase 6 (GRK6), transcript variant 2, mRNA [NM_002082] | 2870 |
| A_23_P30976  | -1.0 | -1.1 | -1.1  | -3.1 | GRM1 | Homo sapiens glutamate receptor, metabotropic 1 (GRM1), transcript variant 1, mRNA [NM_000838]  | 2911 |
| A_23_P70588  | 2.1  | 2.7  | 2.4   | 1.0  | GRM4 | Homo sapiens glutamate receptor, metabotropic 4 (GRM4), mRNA [NM_000841]                        | 2914 |



|              |      |      |      |      |       |                                                                                                |       |
|--------------|------|------|------|------|-------|------------------------------------------------------------------------------------------------|-------|
| A_23_P22364  | -1.0 | -1.0 | -1.1 | -2.3 | GRM7  | Homo sapiens glutamate receptor, metabotropic 7 (GRM7), transcript variant 1, mRNA [NM_000844] | 2917  |
| A_32_P8221   | 1.9  | 1.0  | -8.8 | 1.0  | GRM8  | Homo sapiens glutamate receptor, metabotropic 8 (GRM8), transcript variant 1, mRNA [NM_000845] | 2918  |
| A_24_P938303 | 1.5  | 3.3  | -1.2 | 1.7  | GRPR  | Human GRP/bombesin receptor mRNA, partial cds. [U57365]                                        | 2925  |
| A_24_P256929 | 1.3  | 1.4  | -2.6 | -1.0 | GRRP1 | Homo sapiens glycine/arginine rich protein 1 (GRRP1), mRNA [NM_024869]                         | 79927 |

|              |      |      |       |      |        |                                                                                                   |        |
|--------------|------|------|-------|------|--------|---------------------------------------------------------------------------------------------------|--------|
| A_23_P46131  | 6.7  | 4.3  | 4.3   | 4.3  | GRRP1  | Homo sapiens glycine/arginine rich protein 1 (GRRP1), mRNA [NM_024869]                            | 79927  |
| A_23_P212937 | 1.7  | -2.2 | 2.3   | 1.2  | GRSF1  | Homo sapiens G-rich RNA sequence binding factor 1 (GRSF1), transcript variant 1, mRNA [NM_002092] | 2926   |
| A_23_P142154 | -1.1 | -1.1 | 1.1   | -3.7 | GRWD1  | Homo sapiens glutamate-rich WD repeat containing 1 (GRWD1), mRNA [NM_031485]                      | 83743  |
| A_24_P495367 | -1.0 | -1.0 | -12.2 | -1.1 | GRXCR1 | Homo sapiens glutaredoxin, cysteine rich 1 (GRXCR1), mRNA [NM_001080476]                          | 389207 |

|              |      |      |      |      |       |                                                                           |        |
|--------------|------|------|------|------|-------|---------------------------------------------------------------------------|--------|
| A_23_P109382 | -2.3 | -1.6 | -1.9 | -2.6 | GSC2  | Homo sapiens goosecoid homeobox 2 (GSC2), mRNA [NM_005315]                | 2928   |
| A_23_P112103 | -2.1 | 1.0  | 1.0  | -1.0 | GSDMD | Homo sapiens gasdermin D (GSDMD), transcript variant 1, mRNA [NM_024736]  | 79792  |
| A_23_P368251 | 1.1  | 3.9  | 3.9  | 6.3  | GSG1L | Homo sapiens GSG1-like (GSG1L), transcript variant 2, mRNA [NM_144675]    | 146395 |
| A_32_P58872  | -1.0 | -6.5 | -1.1 | -1.1 | GSG1L | Homo sapiens GSG1-like (GSG1L), transcript variant 1, mRNA [NM_001109763] | 146395 |

|              |       |      |      |      |       |                                                                                                                                         |       |
|--------------|-------|------|------|------|-------|-----------------------------------------------------------------------------------------------------------------------------------------|-------|
| A_24_P76521  | 2.2   | 2.1  | 1.0  | 1.8  | GSG2  | Homo sapiens cDNA FLJ32129 fis, clone PEBLM2000213, weakly similar to Mus musculus genes for integrin $\alpha$ M290, hapsin. [AK056691] | 83903 |
| A_23_P19115  | -4.1  | 1.0  | 1.0  | 1.1  | GSPT2 | Homo sapiens G1 to S phase transition 2 (GSPT2), mRNA [NM_018094]                                                                       | 23708 |
| A_23_P135417 | -8.4  | -1.1 | -1.2 | -1.2 | GSTA1 | Homo sapiens glutathione S-transferase alpha 1 (GSTA1), mRNA [NM_145740]                                                                | 2938  |
| A_24_P300394 | -10.2 | 1.0  | 1.0  | 1.0  | GSTA2 | Homo sapiens glutathione S-transferase alpha 2 (GSTA2), mRNA [NM_000846]                                                                | 2939  |

|              |      |      |      |      |         |                                                                                                                                             |        |
|--------------|------|------|------|------|---------|---------------------------------------------------------------------------------------------------------------------------------------------|--------|
| A_23_P110288 | 1.0  | -1.0 | -1.1 | -2.3 | GSTCD   | Homo sapiens glutathione S-transferase, C-terminal domain containing (GSTCD), transcript variant 2, mRNA [NM_024751]                        | 79807  |
| A_23_P20107  | -1.2 | 2.3  | -1.7 | -1.0 | GSTK1   | Homo sapiens glutathione S-transferase kappa 1 (GSTK1), nuclear gene encoding mitochondrial protein, transcript variant 1, mRNA [NM_015917] | 373156 |
| A_23_P58869  | -1.1 | -1.2 | -4.5 | -1.2 | GSTM2P1 | Homo sapiens glutathione S-transferase mu 2 (muscle) pseudogene 1 (GSTM2P1), non-coding RNA [NR_002932]                                     | 442245 |

|              |       |      |      |      |        |                                                                                                     |       |
|--------------|-------|------|------|------|--------|-----------------------------------------------------------------------------------------------------|-------|
| A_24_P914434 | -1.1  | -1.2 | -2.4 | -1.7 | GSTM3  | Homo sapiens glutathione S-transferase mu 3 (brain) (GSTM3), transcript variant 1, mRNA [NM_000849] | 2947  |
| A_24_P319001 | 2.2   | 2.6  | 2.8  | 1.1  | GSTT1  | Homo sapiens glutathione S-transferase theta 1 (GSTT1), mRNA [NM_000853]                            | 2952  |
| A_23_P357571 | -17.3 | 1.0  | 1.1  | 1.0  | GSTT2  | Homo sapiens glutathione S-transferase theta 2 (GSTT2), mRNA [NM_000854]                            | 2953  |
| A_23_P29163  | 1.3   | 1.3  | 1.2  | -2.3 | GSTTP1 | Homo sapiens glutathione S-transferase theta pseudogene 1 (GSTTP1), non-coding RNA [NR_003081]      | 25774 |

|              |      |      |      |      |       |                                                                                                              |        |
|--------------|------|------|------|------|-------|--------------------------------------------------------------------------------------------------------------|--------|
| A_23_P106204 | -2.0 | -1.3 | -1.0 | -2.7 | GSTZ1 | Homo sapiens glutathione transferase zeta 1 (GSTZ1), transcript variant 1, mRNA [NM_145870]                  | 2954   |
| A_32_P470728 | 2.1  | 2.2  | 1.7  | -1.6 | GSX1  | Homo sapiens GS homeobox 1 (GSX1), mRNA [NM_145657]                                                          | 219409 |
| A_23_P153945 | 1.1  | 1.1  | -5.7 | -1.0 | GTDC1 | Homo sapiens glycosyltransferase-like domain containing 1 (GTDC1), transcript variant 1, mRNA [NM_001006636] | 79712  |
| A_23_P131170 | 1.2  | -6.6 | 1.0  | 1.1  | GTDC1 | Homo sapiens clone HQ0159 PRO0159 mRNA, complete cds. [AF090899]                                             | 79712  |

|              |      |      |      |      |         |                                                                                                                  |        |
|--------------|------|------|------|------|---------|------------------------------------------------------------------------------------------------------------------|--------|
| A_24_P270525 | -3.3 | 1.4  | -2.0 | -1.3 | GTF2A2  | Homo sapiens general transcription factor IIA, 2, 12kDa (GTF2A2), mRNA [NM_004492]                               | 2958   |
| A_23_P34628  | 3.1  | 2.1  | 1.4  | 3.7  | GTF2B   | Homo sapiens general transcription factor IIB (GTF2B), mRNA [NM_001514]                                          | 2959   |
| A_24_P3704   | 1.4  | -2.5 | 1.4  | 1.1  | GTF2H2B | Homo sapiens general transcription factor IIH, polypeptide 2B (pseudogene) (GTF2H2B), non-coding RNA [NR_033417] | 653238 |



|              |      |      |      |      |         |                                                                                               |        |
|--------------|------|------|------|------|---------|-----------------------------------------------------------------------------------------------|--------|
| A_24_P274640 | 2.2  | -1.1 | -1.4 | -1.8 | GTF2H2D | Homo sapiens general transcription factor IIH, polypeptide 2D (GTF2H2D), mRNA [NM_001042490]  | 730394 |
| A_32_P27763  | -1.4 | 1.2  | -3.2 | -1.8 | GTF2H5  | Homo sapiens general transcription factor IIH, polypeptide 5 (GTF2H5), mRNA [NM_207118]       | 404672 |
| A_24_P803801 | -1.3 | -1.2 | -1.4 | -2.2 | GTF2I   | Homo sapiens general transcription factor Iii (GTF2I), transcript variant 1, mRNA [NM_032999] | 2969   |
| A_24_P765784 | 6.7  | 6.5  | 6.3  | 6.8  | GTF2I   | general transcription factor Iii [Source:HGNC Symbol;Acc:4659] [ENST0000473759]               | 2969   |

|              |      |      |      |      |        |                                                                                                                              |      |
|--------------|------|------|------|------|--------|------------------------------------------------------------------------------------------------------------------------------|------|
| A_23_P152344 | -1.0 | -1.1 | -4.9 | -1.1 | GTF3C1 | Homo sapiens general transcription factor III C, polypeptide 1, alpha 220kDa (GTF3C1), mRNA [NM_001520]                      | 2975 |
| A_24_P316363 | 1.8  | -2.7 | -1.5 | -1.0 | GTF3C2 | Homo sapiens general transcription factor III C, polypeptide 2, beta 110kDa (GTF3C2), transcript variant 1, mRNA [NM_001521] | 2976 |
| A_23_P429535 | -2.6 | -2.1 | -2.6 | -2.5 | GTF3C3 | Homo sapiens general transcription factor III C, polypeptide 3, 102kDa (GTF3C3), transcript variant 1, mRNA [NM_012086]      | 9330 |

|              |     |     |      |      |        |                                                                                                                      |      |
|--------------|-----|-----|------|------|--------|----------------------------------------------------------------------------------------------------------------------|------|
| A_24_P78153  | 4.6 | 4.9 | 4.3  | 3.6  | GTF3C4 | Homo sapiens general transcription factor IIC, polypeptide 4, 90kDa (GTF3C4), mRNA [NM_012204]                       | 9329 |
| A_23_P112406 | 1.3 | 1.1 | -2.5 | -1.4 | GTF3C5 | Homo sapiens general transcription factor IIC, polypeptide 5, 63kDa (GTF3C5), transcript variant 2, mRNA [NM_012087] | 9328 |
| A_23_P103120 | 1.2 | 2.0 | -1.8 | 1.1  | GTPBP1 | Homo sapiens GTP binding protein 1 (GTPBP1), mRNA [NM_004286]                                                        | 9567 |

|              |      |      |      |      |         |                                                                                                  |       |
|--------------|------|------|------|------|---------|--------------------------------------------------------------------------------------------------|-------|
| A_23_P168656 | 1.7  | 2.7  | 2.7  | -3.2 | GTPBP10 | Homo sapiens GTP-binding protein 10 (putative) (GTPBP10), transcript variant 2, mRNA [NM_033107] | 85865 |
| A_23_P379026 | 1.1  | -1.2 | -2.3 | -1.8 | GTPBP2  | Homo sapiens GTP binding protein 2 (GTPBP2), mRNA [NM_019096]                                    | 54676 |
| A_32_P115947 | -1.0 | 1.2  | -6.1 | -1.1 | GTPBP4  | GTP binding protein 4 [Source:HGNC Symbol;Acc:21535] [ENST00000360803]                           | 23560 |
| A_24_P391229 | 2.9  | 3.5  | 1.1  | 1.6  | GTPBP5  | Homo sapiens GTP binding protein 5 (putative) (GTPBP5), mRNA [NM_015666]                         | 26164 |

|              |      |     |      |      |        |                                                                                 |       |
|--------------|------|-----|------|------|--------|---------------------------------------------------------------------------------|-------|
| A_23_P113523 | 1.2  | 2.2 | 1.4  | 2.1  | GTPBP6 | Homo sapiens GTP binding protein 6 (putative) (GTPBP6), mRNA [NM_012227]        | 8225  |
| A_23_P57588  | 2.2  | 3.2 | 1.9  | 1.6  | GTSE1  | Homo sapiens G-2 and S-phase expressed 1 (GTSE1), mRNA [NM_016426]              | 51512 |
| A_23_P122414 | 1.0  | 1.0 | -1.1 | -2.7 | GUCA1A | Homo sapiens guanylate cyclase activator 1A (retina) (GUCA1A), mRNA [NM_000409] | 2978  |
| A_23_P81825  | -2.6 | 3.6 | 1.8  | 1.0  | GUCA1B | Homo sapiens guanylate cyclase activator 1B (retina) (GUCA1B), mRNA [NM_002098] | 2979  |

|             |     |      |      |      |         |                                                                                                      |      |
|-------------|-----|------|------|------|---------|------------------------------------------------------------------------------------------------------|------|
| A_32_P64200 | 1.0 | -1.0 | 1.8  | -4.1 | GUCA1B  | Homo sapiens guanylate cyclase activator 1B (retina) (GUCA1B), mRNA [NM_002098]                      | 2979 |
| A_23_P11968 | 1.1 | -1.7 | -3.2 | -2.3 | GUCA2A  | Homo sapiens guanylate cyclase activator 2A (guanylin) (GUCA2A), mRNA [NM_033553]                    | 2980 |
| A_23_P63032 | 4.4 | 4.3  | 5.5  | 3.9  | GUCA2B  | Homo sapiens guanylate cyclase activator 2B (uroguanylin) (GUCA2B), mRNA [NM_007102]                 | 2981 |
| A_23_P69573 | 1.3 | -1.1 | 1.2  | -3.1 | GUCY1A3 | Homo sapiens guanylate cyclase 1, soluble, alpha 3 (GUCY1A3), transcript variant 1, mRNA [NM_000856] | 2982 |

|              |      |      |      |      |        |                                                                                                          |        |
|--------------|------|------|------|------|--------|----------------------------------------------------------------------------------------------------------|--------|
| A_23_P76312  | -1.1 | -3.7 | -1.1 | -1.1 | GUCY2C | Homo sapiens guanylate cyclase 2C (heat stable enterotoxin receptor) (GUCY2C), mRNA [NM_004963]          | 2984   |
| A_32_P4943   | -2.4 | -1.8 | -2.2 | -1.8 | GUF1   | Homo sapiens GUF1 GTPase homolog (S. cerevisiae) (GUF1), mRNA [NM_021927]                                | 60558  |
| A_23_P201097 | 1.6  | 1.7  | 2.4  | 1.0  | GUK1   | Homo sapiens guanylate kinase 1 (GUK1), transcript variant 2, mRNA [NM_000858]                           | 2987   |
| A_32_P92654  | 4.5  | 3.2  | 4.7  | 4.6  | GUSBP1 | Homo sapiens glucuronidase, beta pseudogene 1 (GUSBP1), transcript variant 3, non-coding RNA [NR_027028] | 728411 |

|              |      |       |      |       |        |                                                                                                          |        |
|--------------|------|-------|------|-------|--------|----------------------------------------------------------------------------------------------------------|--------|
| A_32_P190294 | 1.1  | 1.0   | -2.2 | 1.6   | GUSBP1 | Homo sapiens glucuronidase, beta pseudogene 1 (GUSBP1), transcript variant 1, non-coding RNA [NR_027026] | 728411 |
| A_24_P84822  | 1.1  | -46.5 | 1.1  | 1.1   | GUSBP1 | Homo sapiens glucuronidase, beta pseudogene 1 (GUSBP1), transcript variant 3, non-coding RNA [NR_027028] | 728411 |
| A_24_P332739 | -1.0 | -1.7  | -5.5 | -45.1 | GUSBP1 | Homo sapiens glucuronidase, beta pseudogene 1 (GUSBP1), transcript variant 3, non-coding RNA [NR_027028] | 728411 |



|             |      |      |      |      |        |                                                                                                        |        |
|-------------|------|------|------|------|--------|--------------------------------------------------------------------------------------------------------|--------|
| A_23_P75848 | -1.4 | 1.4  | -2.2 | 1.3  | GVINP1 | Homo sapiens GTPase, very large interferon inducible pseudogene 1 (GVINP1), non-coding RNA [NR_003945] | 387751 |
| A_23_P75850 | 2.0  | 2.5  | 2.3  | 1.0  | GVINP1 | Homo sapiens GTPase, very large interferon inducible pseudogene 1 (GVINP1), non-coding RNA [NR_003945] | 387751 |
| A_32_P62342 | -1.2 | -1.2 | 1.0  | -2.1 | GXYLT1 | Homo sapiens glucoside xylosyltransferase 1 (GXYLT1), transcript variant 1, mRNA [NM_173601]           | 283464 |

|              |      |      |      |     |        |                                                                                              |        |
|--------------|------|------|------|-----|--------|----------------------------------------------------------------------------------------------|--------|
| A_23_P336796 | -4.3 | -6.3 | -4.1 | 1.3 | GXYLT1 | Homo sapiens glucoside xylosyltransferase 1 (GXYLT1), transcript variant 1, mRNA [NM_173601] | 283464 |
| A_24_P118196 | 1.3  | -2.1 | 1.5  | 1.1 | GXYLT2 | Homo sapiens glucoside xylosyltransferase 2 (GXYLT2), mRNA [NM_001080393]                    | 727936 |
| A_23_P384517 | 2.3  | 4.0  | 1.2  | 1.4 | GYG1   | Homo sapiens glycogenin 1 (GYG1), transcript variant 1, mRNA [NM_004130]                     | 2992   |
| A_32_P111701 | 2.1  | 2.4  | 1.7  | 1.7 | GYG2   | Homo sapiens glycogenin 2 (GYG2), transcript variant 2, mRNA [NM_003918]                     | 8908   |

|              |      |     |      |      |      |                                                                                                                    |      |
|--------------|------|-----|------|------|------|--------------------------------------------------------------------------------------------------------------------|------|
| A_23_P208698 | 2.1  | 3.1 | 1.1  | -1.0 | GYS1 | Homo sapiens glycogen synthase 1 (muscle) (GYS1), transcript variant 1, mRNA [NM_002103]                           | 2997 |
| A_23_P36621  | -5.3 | 1.2 | 1.2  | 1.0  | GYS2 | Homo sapiens glycogen synthase 2 (liver) (GYS2), mRNA [NM_021957]                                                  | 2998 |
| A_23_P117602 | -1.3 | 2.6 | -2.1 | 1.7  | GZMB | Homo sapiens granzyme B (granzyme 2, cytotoxic T-lymphocyte-associated serine esterase 1) (GZMB), mRNA [NM_004131] | 3002 |

|              |      |      |      |      |       |                                                                                     |        |
|--------------|------|------|------|------|-------|-------------------------------------------------------------------------------------|--------|
| A_23_P156218 | 1.1  | 2.0  | 1.1  | 1.1  | GZMK  | Homo sapiens granzyme K (granzyme 3; tryptase II) (GZMK), mRNA [NM_002104]          | 3003   |
| A_23_P29257  | -1.7 | -4.2 | -1.7 | -1.7 | H1FO  | Homo sapiens H1 histone family, member O (H1FO), mRNA [NM_005318]                   | 3005   |
| A_32_P202859 | 1.1  | 2.2  | 1.2  | 1.8  | H1FNT | Homo sapiens H1 histone family, member N, testis-specific (H1FNT), mRNA [NM_181788] | 341567 |
| A_23_P372994 | 13.8 | 23.2 | 23.1 | 23.0 | H1FOO | Homo sapiens H1 histone family, member O, oocyte-specific (H1FOO), mRNA [NM_153833] | 132243 |

|              |       |      |      |      |        |                                                                                           |        |
|--------------|-------|------|------|------|--------|-------------------------------------------------------------------------------------------|--------|
| A_23_P171270 | -1.3  | 1.7  | 1.0  | -2.7 | H2AFB2 | Homo sapiens H2A histone family, member B2 (H2AFB2), mRNA [NM_001017991]                  | 474381 |
| A_23_P204277 | 2.1   | 1.3  | -1.3 | 1.6  | H2AFJ  | Homo sapiens H2A histone family, member J (H2AFJ), transcript variant 1, mRNA [NM_177925] | 55766  |
| A_23_P432385 | -1.0  | -3.8 | -1.2 | -1.0 | H2AFJ  | Homo sapiens H2A histone family, member J (H2AFJ), transcript variant 1, mRNA [NM_177925] | 55766  |
| A_23_P316487 | -42.8 | 1.3  | 1.3  | 1.0  | H2AFV  | Homo sapiens H2A histone family, member V (H2AFV), transcript variant 2, mRNA [NM_138635] | 94239  |

|              |      |      |      |      |        |                                                                                            |        |
|--------------|------|------|------|------|--------|--------------------------------------------------------------------------------------------|--------|
| A_32_P85591  | -1.3 | -2.2 | -3.0 | -2.8 | H2BFXP | Homo sapiens H2B histone family, member X, pseudogene (H2BFXP), non-coding RNA [NR_003238] | 767811 |
| A_23_P23141  | -2.3 | -1.9 | -2.9 | -1.4 | H3F3A  | Homo sapiens H3 histone, family 3A (H3F3A), mRNA [NM_002107]                               | 3020   |
| A_24_P105298 | -2.1 | -1.7 | -2.4 | -1.2 | H3F3A  | Homo sapiens H3 histone, family 3A (H3F3A), mRNA [NM_002107]                               | 3020   |
| A_24_P323835 | -1.7 | -1.6 | -2.2 | -1.2 | H3F3A  | Homo sapiens H3 histone, family 3A (H3F3A), mRNA [NM_002107]                               | 3020   |

|              |      |      |      |      |       |                                                                                                  |       |
|--------------|------|------|------|------|-------|--------------------------------------------------------------------------------------------------|-------|
| A_24_P590537 | -2.1 | -1.8 | -2.6 | -1.4 | H3F3A | Homo sapiens H3 histone, family 3A (H3F3A), mRNA [NM_002107]                                     | 3020  |
| A_23_P152516 | 1.1  | 2.4  | -1.3 | -1.0 | H3F3B | Homo sapiens H3 histone, family 3B (H3.3B) (H3F3B), mRNA [NM_005324]                             | 3021  |
| A_24_P626850 | -1.0 | -1.4 | -1.0 | -2.6 | H6PD  | Homo sapiens hexose-6-phosphate dehydrogenase (glucose 1-dehydrogenase) (H6PD), mRNA [NM_004285] | 9563  |
| A_24_P541489 | -1.7 | 1.2  | -4.2 | -2.0 | HAB1  | H.sapiens B1 mRNA for mucin. [X83412]                                                            | 55547 |
| A_23_P1173   | -4.5 | -2.0 | -1.1 | -2.5 | HABP2 | Homo sapiens hyaluronan binding protein 2 (HABP2), transcript variant 1, mRNA [NM_004132]        | 3026  |

|              |     |      |      |      |       |                                                                                                                                                                                                      |       |
|--------------|-----|------|------|------|-------|------------------------------------------------------------------------------------------------------------------------------------------------------------------------------------------------------|-------|
| A_32_P79366  | 1.2 | 1.6  | -3.7 | 1.2  | HABP4 | Homo sapiens hyaluronan binding protein 4 (HABP4), mRNA [NM_014282]                                                                                                                                  | 22927 |
| A_24_P353964 | 1.0 | -2.0 | -1.0 | -1.0 | HADHA | Homo sapiens hydroxyacyl-CoA dehydrogenase/3-ketoacyl-CoA thiolase/enoyl-CoA hydratase (trifunctional protein), alpha subunit (HADHA), nuclear gene encoding mitochondrial protein, mRNA [NM_000182] | 3030  |



|              |      |      |      |      |       |                                                                                                                                                                                                      |       |
|--------------|------|------|------|------|-------|------------------------------------------------------------------------------------------------------------------------------------------------------------------------------------------------------|-------|
| A_24_P242688 | 3.1  | 3.1  | 3.0  | 2.3  | HADHA | Homo sapiens hydroxyacyl-CoA dehydrogenase/3-ketoacyl-CoA thiolase/enoyl-CoA hydratase (trifunctional protein), alpha subunit (HADHA), nuclear gene encoding mitochondrial protein, mRNA [NM_000182] | 3030  |
| A_24_P176445 | -1.2 | -1.0 | -2.8 | -1.0 | HAGH  | Homo sapiens hydroxyacylglutathione hydrolase (HAGH), transcript variant 2, mRNA [NM_001040427]                                                                                                      | 3029  |
| A_23_P165162 | 1.3  | 3.6  | -1.4 | 1.2  | HAMP  | Homo sapiens hepcidin antimicrobial peptide (HAMP), mRNA [NM_021175]                                                                                                                                 | 57817 |

|              |      |      |      |      |        |                                                                                             |        |
|--------------|------|------|------|------|--------|---------------------------------------------------------------------------------------------|--------|
| A_23_P373521 | -1.5 | -4.5 | -3.7 | -3.2 | HAND2  | Homo sapiens heart and neural crest derivatives expressed 2 (HAND2), mRNA [NM_021973]       | 9464   |
| A_23_P22129  | -5.7 | 1.1  | -2.4 | -5.2 | HAP1   | Homo sapiens huntingtin-associated protein 1 (HAP1), transcript variant 2, mRNA [NM_177977] | 9001   |
| A_23_P10721  | 1.0  | 1.2  | -2.0 | 1.5  | HAP1   | Homo sapiens huntingtin-associated protein 1 (HAP1), transcript variant 2, mRNA [NM_177977] | 9001   |
| A_23_P430839 | -4.4 | 1.6  | -1.0 | 1.1  | HAPLN4 | Homo sapiens hyaluronan and proteoglycan link protein 4 (HAPLN4), mRNA [NM_023002]          | 404037 |

|              |      |      |      |      |        |                                                                                                    |        |
|--------------|------|------|------|------|--------|----------------------------------------------------------------------------------------------------|--------|
| A_24_P378794 | -2.1 | 1.1  | -2.3 | -1.8 | HAPLN4 | Homo sapiens hyaluronan and proteoglycan link protein 4 (HAPLN4), mRNA [NM_023002]                 | 404037 |
| A_32_P226498 | -1.0 | 1.7  | 2.1  | 1.0  | HAR1A  | Homo sapiens highly accelerated region 1A (non-protein coding) (HAR1A), non-coding RNA [NR_003244] | 768096 |
| A_23_P135465 | 2.6  | 2.1  | 2.2  | -1.4 | HARBI1 | Homo sapiens harbinger transposase derived 1 (HARBI1), mRNA [NM_173811]                            | 283254 |
| A_23_P27400  | 1.3  | -1.2 | -3.6 | 2.0  | HAS1   | Homo sapiens hyaluronan synthase 1 (HAS1), mRNA [NM_001523]                                        | 3036   |

|              |      |      |      |      |       |                                                                                   |       |
|--------------|------|------|------|------|-------|-----------------------------------------------------------------------------------|-------|
| A_23_P393034 | 1.1  | 1.1  | -1.0 | -4.3 | HAS3  | Homo sapiens hyaluronan synthase 3 (HAS3), transcript variant 1, mRNA [NM_005329] | 3038  |
| A_32_P221121 | 4.2  | 2.3  | 3.0  | 4.2  | HAUS3 | Homo sapiens cDNA FLJ52073 complete cds. [AK293948]                               | 79441 |
| A_24_P644742 | -2.4 | 1.1  | 1.1  | 1.0  | HAUS6 | Homo sapiens HAUS augmin-like complex, subunit 6 (HAUS6), mRNA [NM_017645]        | 54801 |
| A_32_P3290   | -2.4 | -1.0 | -1.0 | -1.0 | HAUS6 | Homo sapiens HAUS augmin-like complex, subunit 6 (HAUS6), mRNA [NM_017645]        | 54801 |

|              |      |      |      |       |        |                                                                                                  |       |
|--------------|------|------|------|-------|--------|--------------------------------------------------------------------------------------------------|-------|
| A_23_P416034 | 1.1  | -1.4 | 1.3  | -29.1 | HAUS7  | Homo sapiens HAUS augmin-like complex, subunit 7 (HAUS7), mRNA [NM_017518]                       | 55559 |
| A_23_P141965 | -1.1 | -2.7 | -1.1 | -1.1  | HAUS8  | Homo sapiens HAUS augmin-like complex, subunit 8 (HAUS8), transcript variant 1, mRNA [NM_033417] | 93323 |
| A_24_P411561 | -1.1 | -2.7 | -1.0 | -1.3  | HAVCR2 | Homo sapiens hepatitis A virus cellular receptor 2 (HAVCR2), mRNA [NM_032782]                    | 84868 |
| A_23_P115223 | 1.4  | 1.3  | -1.6 | -5.3  | HAX1   | Homo sapiens HCLS1 associated protein X-1 (HAX1), transcript variant 1, mRNA [NM_006118]         | 10456 |

|              |      |      |      |      |      |                                                             |      |
|--------------|------|------|------|------|------|-------------------------------------------------------------|------|
| A_23_P37856  | 6.4  | 4.2  | 2.5  | 1.9  | HBA1 | Homo sapiens hemoglobin, alpha 1 (HBA1), mRNA [NM_000558]   | 3039 |
| A_23_P26457  | 5.8  | 1.3  | 1.5  | 1.4  | HBA2 | Homo sapiens hemoglobin, alpha 2 (HBA2), mRNA [NM_000517]   | 3040 |
| A_23_P87346  | 2.8  | 2.8  | 2.6  | 2.1  | HBD  | Homo sapiens hemoglobin, delta (HBD), mRNA [NM_000519]      | 3045 |
| A_24_P355568 | 3.0  | 1.4  | 1.5  | 1.6  | HBE1 | Homo sapiens hemoglobin, epsilon 1 (HBE1), mRNA [NM_005330] | 3046 |
| A_23_P64539  | -3.7 | -1.2 | -2.0 | -1.2 | HBG1 | Homo sapiens hemoglobin, gamma A (HBG1), mRNA [NM_000559]   | 3047 |

|              |      |      |      |      |      |                                                                                            |       |
|--------------|------|------|------|------|------|--------------------------------------------------------------------------------------------|-------|
| A_23_P215787 | 1.2  | -3.0 | 1.3  | 1.2  | HBP1 | Homo sapiens HMG-box transcription factor 1 (HBP1), transcript variant 2, mRNA [NM_012257] | 26959 |
| A_24_P204971 | -1.9 | -8.8 | -1.6 | -5.1 | HBP1 | Homo sapiens HMG-box transcription factor 1 (HBP1), transcript variant 2, mRNA [NM_012257] | 26959 |
| A_23_P49254  | -2.4 | -2.0 | -1.7 | -3.9 | HBQ1 | Homo sapiens hemoglobin, theta 1 (HBQ1), mRNA [NM_005331]                                  | 3049  |
| A_23_P3651   | -1.1 | 1.4  | 2.2  | 1.9  | HBZ  | Homo sapiens hemoglobin, zeta (HBZ), mRNA [NM_005332]                                      | 3050  |

|              |      |      |      |      |       |                                                                                            |        |
|--------------|------|------|------|------|-------|--------------------------------------------------------------------------------------------|--------|
| A_23_P436407 | -1.1 | 3.0  | 1.0  | 2.5  | HCCS  | Homo sapiens holocytochrome c synthase (HCCS), transcript variant 1, mRNA [NM_005333]      | 3052   |
| A_23_P257945 | -2.1 | -2.0 | -1.6 | -1.2 | HCCS  | Homo sapiens holocytochrome c synthase (HCCS), transcript variant 1, mRNA [NM_005333]      | 3052   |
| A_24_P567952 | 1.4  | 2.1  | 2.3  | -1.8 | HCG18 | Homo sapiens HLA complex group 18 (non-protein coding) (HCG18), non-coding RNA [NR_024052] | 414777 |



|              |       |      |      |      |       |                                                                                            |        |
|--------------|-------|------|------|------|-------|--------------------------------------------------------------------------------------------|--------|
| A_24_P567944 | 2.6   | 1.4  | -1.8 | -1.1 | HCG18 | Homo sapiens HLA complex group 18 (non-protein coding) (HCG18), non-coding RNA [NR_024052] | 414777 |
| A_23_P254768 | 1.0   | -3.4 | 1.1  | 1.1  | HCG4  | Homo sapiens HLA complex group 4 (non-protein coding) (HCG4), non-coding RNA [NR_002139]   | 54435  |
| A_24_P144963 | -13.3 | 2.1  | 2.1  | 1.5  | HCG4B | Homo sapiens cDNA FLJ32165 fis, clone PLACE6000424. [AK056727]                             | 80868  |

|              |      |     |      |      |        |                                                                                          |       |
|--------------|------|-----|------|------|--------|------------------------------------------------------------------------------------------|-------|
| A_23_P251021 | 1.8  | 1.9 | 3.0  | 1.0  | HCG9   | Homo sapiens HLA complex group 9 (non-protein coding) (HCG9), non-coding RNA [NR_028032] | 10255 |
| A_23_P73429  | 1.7  | 2.1 | -3.4 | -1.5 | HCLS1  | Homo sapiens hematopoietic cell-specific Lyn substrate 1 (HCLS1), mRNA [NM_005335]       | 3059  |
| A_24_P238609 | 1.0  | 2.1 | 1.1  | 1.7  | HCP5   | Homo sapiens HLA complex P5 (non-protein coding) (HCP5), non-coding RNA [NR_040662]      | 10866 |
| A_23_P211673 | -2.3 | 1.8 | 2.3  | -1.0 | HDAC10 | histone deacetylase 10 [Source:HGNC Symbol;Acc:18128] [ENST00000475965]                  | 83933 |

|              |      |     |      |      |       |                                                                                       |       |
|--------------|------|-----|------|------|-------|---------------------------------------------------------------------------------------|-------|
| A_23_P122304 | 1.8  | 2.7 | 1.1  | -3.6 | HDAC2 | Homo sapiens histone deacetylase 2 (HDAC2), transcript variant 1, mRNA [NM_001527]    | 3066  |
| A_24_P359859 | -2.6 | 1.6 | -2.3 | 1.0  | HDAC4 | Homo sapiens histone deacetylase 4 (HDAC4), mRNA [NM_006037]                          | 9759  |
| A_24_P359856 | -2.4 | 1.0 | -1.0 | -2.4 | HDAC4 | Homo sapiens histone deacetylase 4 (HDAC4), mRNA [NM_006037]                          | 9759  |
| A_24_P125283 | -4.2 | 1.2 | -2.5 | 1.1  | HDAC5 | Homo sapiens histone deacetylase 5 (HDAC5), transcript variant 3, mRNA [NM_001015053] | 10014 |

|              |      |      |      |      |       |                                                                                    |       |
|--------------|------|------|------|------|-------|------------------------------------------------------------------------------------|-------|
| A_23_P250455 | 1.7  | -2.5 | -2.3 | -1.1 | HDAC6 | Homo sapiens histone deacetylase 6 (HDAC6), mRNA [NM_006044]                       | 10013 |
| A_32_P841049 | 1.0  | -4.1 | 1.0  | 1.0  | HDAC9 | Homo sapiens histone deacetylase 9 (HDAC9), transcript variant 4, mRNA [NM_178423] | 9734  |
| A_24_P206317 | 1.0  | -7.4 | -1.0 | -1.5 | HDAC9 | Homo sapiens histone deacetylase 9 (HDAC9), transcript variant 1, mRNA [NM_058176] | 9734  |
| A_23_P122796 | -1.6 | -2.6 | -2.1 | -1.2 | HDDC2 | Homo sapiens HD domain containing 2 (HDDC2), mRNA [NM_016063]                      | 51020 |

|              |      |      |      |      |         |                                                                                            |        |
|--------------|------|------|------|------|---------|--------------------------------------------------------------------------------------------|--------|
| A_24_P376707 | 1.1  | 1.0  | -5.7 | 1.1  | HDGF    | Homo sapiens hepatoma-derived growth factor (HDGF), transcript variant 1, mRNA [NM_004494] | 3068   |
| A_23_P301484 | 2.3  | 4.2  | 3.2  | 2.1  | HDGFL1  | hepatoma derived growth factor-like 1 [Source:HGNC Symbol;Acc:21095] [ENST00000510882]     | 154150 |
| A_23_P344451 | -3.0 | -1.3 | -1.3 | -1.2 | HDGFRP3 | Homo sapiens hepatoma-derived growth factor, related protein 3 (HDGFRP3), mRNA [NM_016073] | 50810  |

|              |       |      |      |      |       |                                                                                                       |        |
|--------------|-------|------|------|------|-------|-------------------------------------------------------------------------------------------------------|--------|
| A_23_P153098 | -1.6  | -1.4 | -1.0 | -2.2 | HDHD2 | Homo sapiens haloacid dehalogenase-like hydrolase domain containing 2 (HDHD2), mRNA [NM_032124]       | 84064  |
| A_24_P187443 | -11.9 | 1.1  | 1.5  | 1.2  | HDLBP | Homo sapiens PRO2900 mRNA, complete cds. [AF116718]                                                   | 3069   |
| A_23_P131417 | 1.0   | 2.1  | -1.0 | 1.6  | HDLBP | Homo sapiens high density lipoprotein binding protein (HDLBP), transcript variant 1, mRNA [NM_005336] | 3069   |
| A_23_P386364 | 1.9   | 1.9  | 2.3  | 1.0  | HDX   | Homo sapiens highly divergent homeobox (HDX), transcript variant 2, mRNA [NM_144657]                  | 139324 |

|              |      |      |      |      |          |                                                                                          |        |
|--------------|------|------|------|------|----------|------------------------------------------------------------------------------------------|--------|
| A_23_P259771 | 1.2  | 1.2  | -1.0 | -2.1 | HEATR3   | HEAT repeat containing 3 [Source:HGNC Symbol;Acc:26087] [ENST00000483299]                | 55027  |
| A_24_P696470 | -1.7 | -1.6 | -1.9 | -2.1 | HEATR4   | Homo sapiens HEAT repeat containing 4 (HEATR4), transcript variant 2, mRNA [NM_203309]   | 399671 |
| A_23_P408473 | -3.9 | -2.4 | -3.1 | -2.3 | HEATR7A  | Homo sapiens HEAT repeat containing 7A (HEATR7A), transcript variant 1, mRNA [NM_032450] | 727957 |
| A_23_P407080 | 1.0  | -2.2 | -1.0 | -1.1 | HEATR7B2 | Homo sapiens HEAT repeat family member 7B2 (HEATR7B2), mRNA [NM_173489]                  | 133558 |

|              |      |      |      |      |        |                                                                                                                  |       |
|--------------|------|------|------|------|--------|------------------------------------------------------------------------------------------------------------------|-------|
| A_23_P19691  | -2.0 | -1.6 | -5.3 | -2.1 | HEBP2  | Homo sapiens heme binding protein 2 (HEBP2), mRNA [NM_014320]                                                    | 23593 |
| A_23_P54006  | 2.4  | -2.3 | 1.1  | 1.3  | HECTD1 | Homo sapiens HECT domain containing 1 (HECTD1), mRNA [NM_015382]                                                 | 25831 |
| A_23_P149221 | -1.6 | 1.4  | -2.6 | 1.5  | HECTD3 | Homo sapiens HECT domain containing 3 (HECTD3), mRNA [NM_024602]                                                 | 79654 |
| A_32_P166422 | 1.1  | 1.1  | -1.5 | -3.1 | HECW1  | HECT, C2 and WW domain containing E3 ubiquitin protein ligase 1 [Source:HGNC Symbol;Acc:22195] [ENST00000471527] | 23072 |



|              |      |      |      |      |       |                                                                                                        |       |
|--------------|------|------|------|------|-------|--------------------------------------------------------------------------------------------------------|-------|
| A_23_P319027 | 1.0  | 1.0  | -1.0 | -3.4 | HECW1 | Homo sapiens HECT, C2 and WW domain containing E3 ubiquitin protein ligase 1 (HECW1), mRNA [NM_015052] | 23072 |
| A_23_P50974  | -6.0 | 1.3  | 1.2  | 1.3  | HECW2 | Homo sapiens HECT, C2 and WW domain containing E3 ubiquitin protein ligase 2 (HECW2), mRNA [NM_020760] | 57520 |
| A_24_P85300  | -2.8 | -1.0 | -1.1 | -1.0 | HEG1  | Homo sapiens HEG homolog 1 (zebrafish) (HEG1), mRNA [NM_020733]                                        | 57493 |
| A_23_P2293   | -5.5 | 1.0  | 1.1  | 1.3  | HELB  | Homo sapiens helicase (DNA) B (HELB), mRNA [NM_033647]                                                 | 92797 |

|              |      |      |       |      |         |                                                                                           |        |
|--------------|------|------|-------|------|---------|-------------------------------------------------------------------------------------------|--------|
| A_24_P273635 | 2.1  | 2.0  | 2.0   | 2.2  | HELQ    | Homo sapiens helicase, POLQ-like (HELQ), mRNA [NM_133636]                                 | 113510 |
| A_23_P43412  | -1.8 | -1.6 | -2.5  | -1.2 | HEMGN   | Homo sapiens hemogen (HEMGN), transcript variant 1, mRNA [NM_018437]                      | 55363  |
| A_24_P232545 | -1.1 | -2.0 | 1.5   | 1.5  | HEPACAM | Homo sapiens hepatic and glial cell adhesion molecule (HEPACAM), mRNA [NM_152722]         | 220296 |
| A_24_P213944 | 1.0  | -2.0 | -12.2 | -1.3 | HEPACAM | hepatic and glial cell adhesion molecule [Source:HGNC Symbol;Acc:26361] [ENST00000298251] | 220296 |

|              |      |      |      |      |          |                                                                                            |        |
|--------------|------|------|------|------|----------|--------------------------------------------------------------------------------------------|--------|
| A_32_P118397 | -2.3 | 1.1  | 1.0  | -1.1 | HEPACAM2 | Homo sapiens HEPACAM family member 2 (HEPACAM2), transcript variant 1, mRNA [NM_001039372] | 253012 |
| A_24_P399980 | 1.0  | -1.6 | -1.5 | -2.0 | HEPH     | Homo sapiens hephaestin (HEPH), transcript variant 2, mRNA [NM_014799]                     | 9843   |
| A_23_P33407  | 1.4  | 2.1  | -1.6 | -1.1 | HERC2    | Homo sapiens hect domain and RLD 2 (HERC2), mRNA [NM_004667]                               | 8924   |
| A_32_P211080 | 1.3  | -1.5 | -3.2 | -2.7 | HERC2P2  | Homo sapiens hect domain and RLD 2 pseudogene 2 (HERC2P2), non-coding RNA [NR_002824]      | 400322 |

|              |      |      |      |      |         |                                                                                               |        |
|--------------|------|------|------|------|---------|-----------------------------------------------------------------------------------------------|--------|
| A_24_P222237 | 1.4  | 1.5  | 3.5  | 3.7  | HERC2P2 | Homo sapiens hect domain and RLD 2 pseudogene 2 (HERC2P2), non-coding RNA [NR_002824]         | 400322 |
| A_32_P139738 | 1.6  | -2.5 | 1.5  | 1.0  | HERC2P4 | Homo sapiens hect domain and RLD 2 pseudogene 4 (HERC2P4), non-coding RNA [NR_002827]         | 440362 |
| A_24_P51201  | -9.0 | -1.1 | -1.2 | -1.2 | HERC3   | Homo sapiens hect domain and RLD 3, mRNA (cDNA clone IMAGE:6050308), complete cds. [BC038960] | 8916   |

|              |      |      |      |      |       |                                                                                                        |       |
|--------------|------|------|------|------|-------|--------------------------------------------------------------------------------------------------------|-------|
| A_23_P121586 | 1.0  | -1.0 | -3.7 | -1.1 | HERC3 | Homo sapiens hect domain and RLD 3 (HERC3), mRNA [NM_014606]                                           | 8916  |
| A_23_P6596   | 2.2  | -1.0 | 2.1  | 2.1  | HES1  | Homo sapiens hairy and enhancer of split 1, (Drosophila) (HES1), mRNA [NM_005524]                      | 3280  |
| A_23_P201687 | -2.3 | -1.2 | -1.3 | -1.3 | HES2  | hairy and enhancer of split 2 (Drosophila) [Source:HGNC Symbol;Acc:16005] [ENST00000377836]            | 54626 |
| A_23_P149448 | 5.9  | 1.9  | 1.8  | 2.1  | HES4  | Homo sapiens hairy and enhancer of split 4 (Drosophila) (HES4), transcript variant 2, mRNA [NM_021170] | 57801 |

|              |      |      |      |      |       |                                                                                                        |        |
|--------------|------|------|------|------|-------|--------------------------------------------------------------------------------------------------------|--------|
| A_32_P234184 | 2.0  | 4.8  | 1.5  | 2.0  | HES5  | Homo sapiens hairy and enhancer of split 5 (Drosophila) (HES5), mRNA [NM_001010926]                    | 388585 |
| A_23_P131202 | -1.7 | -1.3 | -1.7 | -4.2 | HES6  | Homo sapiens hairy and enhancer of split 6 (Drosophila) (HES6), transcript variant 1, mRNA [NM_018645] | 55502  |
| A_23_P121102 | 2.1  | 2.4  | 2.1  | 2.1  | HESX1 | Homo sapiens HESX homeobox 1 (HESX1), mRNA [NM_003865]                                                 | 8820   |
| A_23_P121106 | -3.8 | -1.0 | -1.1 | -1.1 | HESX1 | Homo sapiens HESX homeobox 1 (HESX1), mRNA [NM_003865]                                                 | 8820   |

|              |      |      |      |      |      |                                                                            |      |
|--------------|------|------|------|------|------|----------------------------------------------------------------------------|------|
| A_23_P156049 | -3.0 | -1.1 | -2.0 | -1.3 | HEXB | Homo sapiens hexosaminidase B (beta polypeptide) (HEXB), mRNA [NM_000521]  | 3074 |
| A_24_P354748 | -1.2 | 1.1  | 2.3  | 1.0  | HFE  | Homo sapiens hemochromatosis (HFE), transcript variant 6, mRNA [NM_139006] | 3077 |
| A_24_P103448 | -1.5 | -2.0 | -1.5 | -1.5 | HFE  | Homo sapiens hemochromatosis (HFE), transcript variant 1, mRNA [NM_000410] | 3077 |
| A_24_P111996 | -4.4 | 1.4  | 1.3  | 1.0  | HFE  | Homo sapiens hemochromatosis (HFE), transcript variant 1, mRNA [NM_000410] | 3077 |

|              |      |     |     |      |        |                                                                                                   |           |
|--------------|------|-----|-----|------|--------|---------------------------------------------------------------------------------------------------|-----------|
| A_24_P186551 | 2.2  | 1.4 | 1.7 | -1.2 | HGC6.3 | Homo sapiens uncharacterized LOC100128124 (HGC6.3), mRNA [NM_00129895]                            | 100128124 |
| A_23_P250164 | -2.5 | 1.1 | 2.7 | 1.8  | HGD    | Homo sapiens homogentisate 1,2-dioxygenase (HGD), mRNA [NM_000187]                                | 3081      |
| A_23_P58108  | 3.5  | 3.5 | 1.1 | 2.9  | HGFAC  | Homo sapiens HGF activator (HGFAC), mRNA [NM_001528]                                              | 3083      |
| A_23_P61230  | 3.1  | 4.6 | 3.6 | -1.1 | HGS    | Homo sapiens hepatocyte growth factor-regulated tyrosine kinase substrate (HGS), mRNA [NM_004712] | 9146      |



|              |       |      |      |      |        |                                                                                                   |        |
|--------------|-------|------|------|------|--------|---------------------------------------------------------------------------------------------------|--------|
| A_24_P125993 | 1.8   | 3.4  | -1.1 | 1.9  | HGS    | Homo sapiens hepatocyte growth factor-regulated tyrosine kinase substrate (HGS), mRNA [NM_004712] | 9146   |
| A_24_P120827 | 2.5   | 1.2  | 1.5  | 3.3  | HGSNAT | Homo sapiens heparan-alpha-glucosaminide N-acetyltransferase (HGSNAT), mRNA [NM_152419]           | 138050 |
| A_23_P255298 | -18.9 | 1.3  | 1.4  | 1.0  | HHATL  | Homo sapiens hedgehog acyltransferase-like (HHATL), transcript variant 1, mRNA [NM_020707]        | 57467  |
| A_23_P47034  | 1.1   | -2.8 | -1.7 | -2.0 | HHEX   | Homo sapiens hematopoietically expressed homeobox (HHEX), mRNA [NM_002729]                        | 3087   |

|              |      |      |      |      |        |                                                                                 |       |
|--------------|------|------|------|------|--------|---------------------------------------------------------------------------------|-------|
| A_24_P162254 | 1.8  | -1.2 | 2.1  | -1.2 | HHIPL1 | HHIP-like 1<br>[Source:HGNC Symbol;Acc:19710]<br>[ENST00000330710]              | 84439 |
| A_24_P127491 | -2.2 | -2.3 | -1.3 | -1.9 | HHIPL1 | Homo sapiens HHIP-like 1 (HHIPL1), transcript variant 1, mRNA<br>[NM_001127258] | 84439 |
| A_23_P86059  | -1.4 | -1.5 | -1.6 | -2.0 | HHIPL2 | Homo sapiens HHIP-like 2 (HHIPL2), mRNA<br>[NM_024746]                          | 79802 |
| A_23_P157556 | -1.2 | 2.9  | -1.8 | -1.0 | HHLA1  | Homo sapiens HERV-H LTR-associating 1 (HHLA1), mRNA<br>[NM_001145095]           | 10086 |
| A_24_P388033 | 19.3 | 17.1 | 13.5 | 19.5 | HIAT1  | Homo sapiens hippocampus abundant transcript 1 (HIAT1), mRNA<br>[NM_033055]     | 64645 |

|              |      |      |      |      |        |                                                                                         |       |
|--------------|------|------|------|------|--------|-----------------------------------------------------------------------------------------|-------|
| A_23_P33187  | -1.6 | -4.2 | -1.4 | -1.1 | HIATL1 | Homo sapiens hippocampus abundant transcript-like 1 (HIATL1), mRNA [NM_032558]          | 84641 |
| A_23_P399169 | 1.8  | 2.2  | 1.1  | 1.6  | HIC1   | Homo sapiens hypermethylated in cancer 1 (HIC1), transcript variant 1, mRNA [NM_006497] | 3090  |
| A_23_P129856 | 2.0  | 1.4  | 2.6  | 1.2  | HIC1   | Homo sapiens hypermethylated in cancer 1 (HIC1), transcript variant 1, mRNA [NM_006497] | 3090  |
| A_23_P383132 | 1.0  | -1.0 | -1.0 | -6.8 | HIC2   | Homo sapiens hypermethylated in cancer 2 (HIC2), mRNA [NM_015094]                       | 23119 |

|              |      |      |      |      |        |                                                                                                                       |        |
|--------------|------|------|------|------|--------|-----------------------------------------------------------------------------------------------------------------------|--------|
| A_23_P304386 | -1.5 | -1.0 | -1.1 | -2.4 | HIGD2A | Homo sapiens HIG1 hypoxia inducible domain family, member 2A (HIGD2A), mRNA [NM_138820]                               | 192286 |
| A_24_P144784 | -1.3 | 1.1  | 1.4  | 2.1  | HILS1  | Homo sapiens histone linker H1 domain, spermatid-specific 1 (HILS1), transcript variant 1, non-coding RNA [NR_024193] | 373861 |
| A_23_P13176  | -2.2 | 1.0  | -1.4 | 1.0  | HINFP  | Homo sapiens histone H4 transcription factor (HINFP), transcript variant 1, mRNA [NM_015517]                          | 25988  |

|              |      |      |      |      |       |                                                                                                                                  |       |
|--------------|------|------|------|------|-------|----------------------------------------------------------------------------------------------------------------------------------|-------|
| A_23_P157784 | -2.1 | 1.1  | -1.2 | -2.3 | HINT2 | Homo sapiens histidine triad nucleotide binding protein 2 (HINT2), nuclear gene encoding mitochondrial protein, mRNA [NM_032593] | 84681 |
| A_24_P916314 | -1.5 | -2.4 | -2.9 | 1.2  | HIP1  | Homo sapiens huntingtin interacting protein 1 (HIP1), transcript variant 1, mRNA [NM_005338]                                     | 3092  |
| A_23_P398294 | 1.0  | -1.0 | 2.2  | -1.0 | HIP1R | Homo sapiens huntingtin interacting protein 1 related (HIP1R), mRNA [NM_003959]                                                  | 9026  |

|              |      |      |      |      |       |                                                                                                       |        |
|--------------|------|------|------|------|-------|-------------------------------------------------------------------------------------------------------|--------|
| A_24_P385336 | 2.6  | -5.3 | -2.9 | 1.4  | HIPK1 | Homo sapiens homeodomain interacting protein kinase 1 (HIPK1), transcript variant 2, mRNA [NM_152696] | 204851 |
| A_24_P681011 | -6.7 | 1.6  | -2.0 | -1.1 | HIPK2 | Homo sapiens homeodomain interacting protein kinase 2 (HIPK2), transcript variant 1, mRNA [NM_022740] | 28996  |
| A_23_P169756 | -1.0 | 3.6  | -1.1 | -1.1 | HIPK2 | Homo sapiens homeodomain interacting protein kinase 2 (HIPK2), transcript variant 1, mRNA [NM_022740] | 28996  |

|              |      |      |      |      |       |                                                                                                       |       |
|--------------|------|------|------|------|-------|-------------------------------------------------------------------------------------------------------|-------|
| A_24_P500621 | -1.0 | -1.0 | -1.1 | -3.6 | HIPK2 | Homo sapiens homeodomain interacting protein kinase 2 (HIPK2), transcript variant 1, mRNA [NM_022740] | 28996 |
| A_24_P364072 | 1.0  | 1.0  | -2.7 | -3.8 | HIPK3 | homeodomain interacting protein kinase 3 [Source:HGNC Symbol;Acc:4915] [ENST00000303296]              | 10114 |
| A_23_P422809 | 3.0  | 2.9  | 2.1  | 2.9  | HIPK3 | Homo sapiens homeodomain interacting protein kinase 3 (HIPK3), transcript variant 1, mRNA [NM_005734] | 10114 |

|              |      |      |      |      |          |                                                                                          |        |
|--------------|------|------|------|------|----------|------------------------------------------------------------------------------------------|--------|
| A_23_P329945 | 2.5  | 2.4  | 1.3  | -1.4 | HIPK4    | Homo sapiens homeodomain interacting protein kinase 4 (HIPK4), mRNA [NM_144685]          | 147746 |
| A_24_P142269 | 1.1  | 1.1  | -2.6 | 1.0  | HIRIP3   | Homo sapiens HIRA interacting protein 3 (HIRIP3), transcript variant 1, mRNA [NM_003609] | 8479   |
| A_23_P250385 | 1.2  | 2.6  | 1.1  | -1.2 | HIST1H1B | Homo sapiens histone cluster 1, H1b (HIST1H1B), mRNA [NM_005322]                         | 3009   |
| A_23_P122443 | -1.8 | -3.4 | 2.0  | -1.8 | HIST1H1C | Homo sapiens histone cluster 1, H1c (HIST1H1C), mRNA [NM_005319]                         | 3006   |



|              |      |      |      |      |           |                                                                    |      |
|--------------|------|------|------|------|-----------|--------------------------------------------------------------------|------|
| A_24_P260639 | 2.4  | 2.0  | -1.3 | 2.4  | HIST1H1D  | Homo sapiens histone cluster 1, H1d (HIST1H1D), mRNA [NM_005320]   | 3007 |
| A_23_P7976   | 1.6  | 3.6  | 2.7  | 2.9  | HIST1H1E  | Homo sapiens histone cluster 1, H1e (HIST1H1E), mRNA [NM_005321]   | 3008 |
| A_23_P133842 | -1.0 | -6.3 | -1.7 | -1.0 | HIST1H1T  | Homo sapiens histone cluster 1, H1t (HIST1H1T), mRNA [NM_005323]   | 3010 |
| A_23_P59045  | 1.1  | 1.6  | -1.6 | 2.3  | HIST1H2AE | Homo sapiens histone cluster 1, H2ae (HIST1H2AE), mRNA [NM_021052] | 3012 |
| A_24_P394510 | -1.3 | -1.4 | -2.3 | -1.4 | HIST1H2AJ | Homo sapiens histone cluster 1, H2aj (HIST1H2AJ), mRNA [NM_021066] | 8331 |

|              |      |      |      |      |           |                                                                                                           |      |
|--------------|------|------|------|------|-----------|-----------------------------------------------------------------------------------------------------------|------|
| A_24_P940441 | -2.2 | 1.4  | -1.9 | 1.0  | HIST1H2AK | Homo sapiens histone cluster 1, H2ak, mRNA (cDNA clone MGC:26490 IMAGE:4825623), complete cds. [BC034487] | 8330 |
| A_23_P363174 | -2.9 | -7.6 | -8.2 | -5.2 | HIST1H2AL | Homo sapiens histone cluster 1, H2al (HIST1H2AL), mRNA [NM_003511]                                        | 8332 |
| A_23_P111054 | -2.2 | -1.9 | -1.3 | -6.3 | HIST1H2BB | Homo sapiens histone cluster 1, H2bb (HIST1H2BB), mRNA [NM_021062]                                        | 3018 |
| A_23_P93180  | -1.3 | -1.9 | -2.7 | -1.5 | HIST1H2BC | Homo sapiens histone cluster 1, H2bc (HIST1H2BC), mRNA [NM_003526]                                        | 8347 |

|              |      |      |      |      |           |                                                                    |       |
|--------------|------|------|------|------|-----------|--------------------------------------------------------------------|-------|
| A_23_P167997 | 2.6  | 1.8  | 1.4  | 1.8  | HIST1H2BG | Homo sapiens histone cluster 1, H2bg (HIST1H2BG), mRNA [NM_003518] | 8339  |
| A_23_P145238 | 1.3  | 2.2  | 2.2  | -1.2 | HIST1H2BK | Homo sapiens histone cluster 1, H2bk (HIST1H2BK), mRNA [NM_080593] | 85236 |
| A_24_P174924 | -1.2 | 3.1  | 1.6  | 3.0  | HIST1H3B  | Homo sapiens histone cluster 1, H3b (HIST1H3B), mRNA [NM_003537]   | 8358  |
| A_23_P70445  | -2.1 | -1.9 | -2.7 | -1.6 | HIST1H3E  | Homo sapiens histone cluster 1, H3e (HIST1H3E), mRNA [NM_003532]   | 8353  |

|             |      |      |      |      |          |                                                                                                                 |      |
|-------------|------|------|------|------|----------|-----------------------------------------------------------------------------------------------------------------|------|
| A_23_P8004  | -1.9 | -1.9 | -2.1 | -1.9 | HIST1H3F | Homo sapiens histone cluster 1, H3f, mRNA (cDNA clone IMAGE:3162462), with apparent retained intron. [BC062305] | 8968 |
| A_24_P97914 | -4.6 | -2.4 | -2.4 | -2.4 | HIST1H3F | Homo sapiens histone cluster 1, H3f, mRNA (cDNA clone IMAGE:3162462), with apparent retained intron. [BC062305] | 8968 |
| A_23_P30799 | 1.8  | 2.5  | -1.9 | -2.0 | HIST1H3F | Homo sapiens histone cluster 1, H3f (HIST1H3F), mRNA [NM_021018]                                                | 8968 |

|              |      |      |      |      |          |                                                                                  |      |
|--------------|------|------|------|------|----------|----------------------------------------------------------------------------------|------|
| A_32_P794894 | 1.1  | 1.2  | -1.1 | -2.2 | HIST1H3G | Homo sapiens histone cluster 1, H3g, mRNA (cDNA clone IMAGE:4563941). [BC012185] | 8355 |
| A_23_P333484 | -1.5 | -1.5 | -3.4 | -1.6 | HIST1H3H | Homo sapiens histone cluster 1, H3h (HIST1H3H), mRNA [NM_003536]                 | 8357 |
| A_23_P395374 | 2.8  | 2.1  | 1.6  | -1.1 | HIST1H4D | Homo sapiens histone cluster 1, H4d (HIST1H4D), mRNA [NM_003539]                 | 8360 |
| A_23_P415411 | 9.9  | 5.3  | 5.5  | 9.6  | HIST1H4E | Homo sapiens histone cluster 1, H4e (HIST1H4E), mRNA [NM_003545]                 | 8367 |
| A_23_P359540 | -2.0 | -1.2 | -3.5 | -2.7 | HIST1H4F | Homo sapiens histone cluster 1, H4f (HIST1H4F), mRNA [NM_003540]                 | 8361 |

|              |      |      |      |      |            |                                                                         |        |
|--------------|------|------|------|------|------------|-------------------------------------------------------------------------|--------|
| A_23_P323685 | -1.6 | -1.2 | -2.0 | -1.3 | HIST1H4H   | Homo sapiens histone cluster 1, H4h (HIST1H4H), mRNA [NM_003543]        | 8365   |
| A_23_P30805  | -1.8 | -1.4 | -2.2 | -1.6 | HIST1H4J   | Homo sapiens histone cluster 1, H4j (HIST1H4J), mRNA [NM_021968]        | 8363   |
| A_23_P70480  | 1.8  | 1.0  | -2.6 | -1.3 | HIST1H4L   | Homo sapiens histone cluster 1, H4l (HIST1H4L), mRNA [NM_003546]        | 8368   |
| A_23_P309381 | -1.0 | -1.0 | -1.0 | 2.7  | HIST2H2AA4 | Homo sapiens histone cluster 2, H2aa4 (HIST2H2AA4), mRNA [NM_001040874] | 723790 |
| A_23_P343927 | -1.1 | -3.0 | -2.8 | -2.8 | HIST2H2AB  | Homo sapiens histone cluster 2, H2ab (HIST2H2AB), mRNA [NM_175065]      | 317772 |

|              |       |      |      |      |        |                                                                                                                                        |       |
|--------------|-------|------|------|------|--------|----------------------------------------------------------------------------------------------------------------------------------------|-------|
| A_23_P19619  | -37.5 | -1.3 | -1.4 | -1.4 | HIVEP1 | Homo sapiens human immunodeficiency virus type 1 enhancer binding protein 1 (HIVEP1), mRNA [NM_002114]                                 | 3096  |
| A_23_P35330  | -1.5  | 3.0  | 1.9  | 1.5  | HIVEP3 | Homo sapiens human immunodeficiency virus type 1 enhancer binding protein 3 (HIVEP3), transcript variant 1, mRNA [NM_024503]           | 59269 |
| A_24_P876734 | -1.4  | -1.0 | -2.5 | -2.8 | HIVEP3 | Homo sapiens human immunodeficiency virus type 1 enhancer binding protein 3 (HIVEP3), transcript variant 3, non-coding RNA [NR_038260] | 59269 |

|              |      |      |      |      |       |                                                                                                             |       |
|--------------|------|------|------|------|-------|-------------------------------------------------------------------------------------------------------------|-------|
| A_23_P398460 | -2.1 | -1.3 | 1.1  | 1.3  | HK2   | Homo sapiens hexokinase 2 (HK2), mRNA [NM_000189]                                                           | 3099  |
| A_24_P37962  | 1.6  | -2.9 | -1.5 | -2.0 | HK3   | Homo sapiens hexokinase 3 (white cell) (HK3), nuclear gene encoding mitochondrial protein, mRNA [NM_002115] | 3101  |
| A_23_P213584 | -2.1 | -1.1 | -2.0 | 1.2  | HK3   | Homo sapiens hexokinase 3 (white cell) (HK3), nuclear gene encoding mitochondrial protein, mRNA [NM_002115] | 3101  |
| A_23_P202427 | -1.1 | -8.1 | -1.2 | -1.2 | HKDC1 | Homo sapiens hexokinase domain containing 1 (HKDC1), mRNA [NM_025130]                                       | 80201 |



|              |     |      |      |      |       |                                                                                                           |      |
|--------------|-----|------|------|------|-------|-----------------------------------------------------------------------------------------------------------|------|
| A_24_P376483 | 2.1 | -1.4 | -1.2 | -1.0 | HLA-A | Homo sapiens major histocompatibility complex, class I, A (HLA-A), transcript variant 1, mRNA [NM_002116] | 3105 |
| A_23_P125107 | 3.8 | 4.3  | 1.1  | -1.3 | HLA-B | Homo sapiens major histocompatibility complex, class I, B (HLA-B), mRNA [NM_005514]                       | 3106 |
| A_23_P113716 | 1.6 | 2.0  | 2.2  | 1.1  | HLA-C | major histocompatibility complex, class I, C [Source:HGNC Symbol;Acc:4933] [ENST0000052865]               | 3107 |
| A_23_P95917  | 2.2 | 1.9  | 2.3  | 1.7  | HLA-C | major histocompatibility complex, class I, C [Source:HGNC Symbol;Acc:4933] [ENST00000429840]              | 3107 |

|              |      |      |      |      |         |                                                                                                           |      |
|--------------|------|------|------|------|---------|-----------------------------------------------------------------------------------------------------------|------|
| A_24_P298409 | -3.0 | -1.2 | -1.1 | 1.1  | HLA-C   | Homo sapiens major histocompatibility complex, class I, C (HLA-C), transcript variant 1, mRNA [NM_002117] | 3107 |
| A_32_P356316 | -2.2 | -1.0 | -1.2 | -1.0 | HLA-DOA | Homo sapiens major histocompatibility complex, class II, DO alpha (HLA-DOA), mRNA [NM_002119]             | 3111 |
| A_24_P354800 | 6.6  | 11.3 | 2.6  | 4.6  | HLA-DOA | Homo sapiens major histocompatibility complex, class II, DO alpha (HLA-DOA), mRNA [NM_002119]             | 3111 |

|             |     |      |      |      |          |                                                                                                                        |      |
|-------------|-----|------|------|------|----------|------------------------------------------------------------------------------------------------------------------------|------|
| A_23_P30927 | 1.0 | 2.0  | -1.6 | -1.0 | HLA-DOA  | Homo sapiens major histocompatibility complex, class II, DO alpha (HLA-DOA), mRNA [NM_002119]                          | 3111 |
| A_23_P30736 | 1.9 | 3.9  | 1.3  | 1.3  | HLA-DOB  | Homo sapiens major histocompatibility complex, class II, DO beta (HLA-DOB), mRNA [NM_002120]                           | 3112 |
| A_23_P30913 | 1.5 | -2.3 | -1.7 | -2.6 | HLA-DPA1 | Homo sapiens major histocompatibility complex, class II, DP alpha 1 (HLA-DPA1), transcript variant 1, mRNA [NM_033554] | 3113 |

|              |      |      |      |      |          |                                                                                                                        |      |
|--------------|------|------|------|------|----------|------------------------------------------------------------------------------------------------------------------------|------|
| A_24_P288836 | -1.1 | 1.4  | -2.3 | -1.6 | HLA-DPB2 | Homo sapiens major histocompatibility complex, class II, DP beta 2 (pseudogene) (HLA-DPB2), non-coding RNA [NR_001435] | 3116 |
| A_24_P196827 | 1.6  | 2.2  | -1.0 | 1.8  | HLA-DQA1 | Homo sapiens major histocompatibility complex, class II, DQ alpha 1 (HLA-DQA1), mRNA [NM_002122]                       | 3117 |
| A_24_P852756 | -1.4 | -1.3 | -3.6 | -1.8 | HLA-DQA2 | Homo sapiens major histocompatibility complex, class II, DQ alpha 2 (HLA-DQA2), mRNA [NM_020056]                       | 3118 |

|              |      |      |      |      |          |                                                                                                                          |      |
|--------------|------|------|------|------|----------|--------------------------------------------------------------------------------------------------------------------------|------|
| A_23_P42302  | -1.0 | -9.5 | -1.0 | -1.0 | HLA-DQA2 | Homo sapiens major histocompatibility complex, class II, DQ alpha 2 (HLA-DQA2), mRNA [NM_020056]                         | 3118 |
| A_23_P8108   | -3.6 | 1.1  | 1.9  | 1.0  | HLA-DQB1 | Homo sapiens major histocompatibility complex, class II, DQ beta 1 (HLA-DQB1), transcript variant 3, mRNA [NM_001243962] | 3119 |
| A_24_P239676 | -4.0 | -1.1 | 1.1  | -1.7 | HLA-DQB1 | Homo sapiens major histocompatibility complex, class II, DQ beta 1 (HLA-DQB1), transcript variant 1, mRNA [NM_002123]    | 3119 |

|              |      |      |      |      |          |                                                                                                                       |      |
|--------------|------|------|------|------|----------|-----------------------------------------------------------------------------------------------------------------------|------|
| A_23_P19510  | -7.1 | 1.4  | -2.7 | 1.5  | HLA-DQB2 | Homo sapiens major histocompatibility complex, class II, DQ beta 2 (HLA-DQB2), mRNA [NM_001198858]                    | 3120 |
| A_24_P343233 | 1.9  | 2.3  | 1.5  | 1.7  | HLA-DRB1 | Homo sapiens major histocompatibility complex, class II, DR beta 1 (HLA-DRB1), transcript variant 1, mRNA [NM_002124] | 3123 |
| A_23_P31006  | -7.9 | -1.1 | -1.7 | -1.5 | HLA-DRB5 | Homo sapiens major histocompatibility complex, class II, DR beta 5 (HLA-DRB5), mRNA [NM_002125]                       | 3127 |

|              |      |      |      |      |       |                                                                                                           |      |
|--------------|------|------|------|------|-------|-----------------------------------------------------------------------------------------------------------|------|
| A_24_P326082 | 1.5  | -2.9 | 1.1  | 1.4  | HLA-E | Homo sapiens major histocompatibility complex, class I, E (HLA-E), mRNA [NM_005516]                       | 3133 |
| A_32_P460973 | 2.7  | 4.3  | 2.5  | 2.6  | HLA-E | Homo sapiens major histocompatibility complex, class I, E (HLA-E), mRNA [NM_005516]                       | 3133 |
| A_23_P145264 | -1.2 | -3.5 | -5.1 | -1.9 | HLA-F | Homo sapiens major histocompatibility complex, class I, F (HLA-F), transcript variant 2, mRNA [NM_018950] | 3134 |

|              |      |     |     |      |           |                                                                                                                       |        |
|--------------|------|-----|-----|------|-----------|-----------------------------------------------------------------------------------------------------------------------|--------|
| A_32_P76811  | 2.5  | 1.9 | 1.4 | -1.0 | HLA-F-AS1 | Homo sapiens HLA-F antisense RNA 1 (non-protein coding) (HLA-F-AS1), transcript variant 1, non-coding RNA [NR_026972] | 285830 |
| A_23_P356585 | 3.1  | 2.1 | 3.1 | 1.3  | HLF       | Homo sapiens hepatic leukemia factor (HLF), mRNA [NM_002126]                                                          | 3131   |
| A_23_P126266 | -9.0 | 1.1 | 1.3 | 1.1  | HLX       | Homo sapiens H2.0-like homeobox (HLX), mRNA [NM_021958]                                                               | 3142   |
| A_23_P134684 | 1.5  | 3.4 | 1.8 | 2.2  | HMBOX1    | Homo sapiens homeobox containing 1 (HMBOX1), transcript variant 1, mRNA [NM_024567]                                   | 79618  |



|              |      |      |      |      |        |                                                                                            |       |
|--------------|------|------|------|------|--------|--------------------------------------------------------------------------------------------|-------|
| A_24_P932736 | 4.0  | 3.9  | 1.7  | 2.1  | HMBOX1 | homeobox containing 1 [Source:HGNC Symbol;Acc:26137] [ENST00000397358]                     | 79618 |
| A_24_P222043 | 47.5 | 4.1  | 10.3 | 12.8 | HMGA1  | Homo sapiens high mobility group AT-hook 1 (HMGA1), transcript variant 2, mRNA [NM_002131] | 3159  |
| A_23_P95930  | -4.8 | -1.1 | -1.0 | -1.1 | HMGA2  | Homo sapiens high mobility group AT-hook 2 (HMGA2), transcript variant 1, mRNA [NM_003483] | 8091  |
| A_23_P99985  | 1.3  | 2.2  | 2.2  | 1.3  | HMGB1  | Homo sapiens high mobility group box 1 (HMGB1), mRNA [NM_002128]                           | 3146  |

|              |      |      |      |      |        |                                                                                                                   |      |
|--------------|------|------|------|------|--------|-------------------------------------------------------------------------------------------------------------------|------|
| A_23_P133263 | -1.1 | -2.2 | -1.1 | -1.1 | HMGCS1 | Homo sapiens 3-hydroxy-3-methylglutaryl-CoA synthase 1 (soluble) (HMGCS1), transcript variant 2, mRNA [NM_002130] | 3157 |
| A_32_P22263  | 1.1  | -2.1 | -1.1 | -1.5 | HMGN1  | Homo sapiens high mobility group nucleosome binding domain 1 (HMGN1), mRNA [NM_004965]                            | 3150 |
| A_32_P29507  | -1.0 | -1.0 | -1.7 | -2.1 | HMGN2  | Homo sapiens high mobility group nucleosomal binding domain 2 (HMGN2), mRNA [NM_005517]                           | 3151 |

|              |      |      |      |      |       |                                                                                                               |       |
|--------------|------|------|------|------|-------|---------------------------------------------------------------------------------------------------------------|-------|
| A_32_P1381   | 3.7  | -1.1 | 1.1  | -1.3 | HMGN2 | Human non-histone chromosomal protein HMG-17 mRNA, complete cds. [M12623]                                     | 3151  |
| A_24_P132099 | -8.0 | 1.0  | -1.2 | 1.1  | HMGN3 | Homo sapiens high mobility group nucleosomal binding domain 3 (HMGN3), transcript variant 2, mRNA [NM_138730] | 9324  |
| A_23_P19389  | 2.1  | -2.2 | 1.7  | -1.0 | HMGN4 | Homo sapiens high mobility group nucleosomal binding domain 4 (HMGN4), mRNA [NM_006353]                       | 10473 |

|              |      |      |      |       |       |                                                                                         |       |
|--------------|------|------|------|-------|-------|-----------------------------------------------------------------------------------------|-------|
| A_24_P397515 | -1.3 | -4.7 | -1.5 | -1.5  | HMGN4 | Homo sapiens high mobility group nucleosomal binding domain 4 (HMGN4), mRNA [NM_006353] | 10473 |
| A_32_P444460 | -2.4 | 1.1  | 1.1  | 1.0   | HMGN5 | Homo sapiens high mobility group nucleosome binding domain 5 (HMGN5), mRNA [NM_030763]  | 79366 |
| A_23_P319005 | -1.9 | -1.6 | -1.7 | -15.1 | HMP19 | Homo sapiens HMP19 protein (HMP19), mRNA [NM_015980]                                    | 51617 |
| A_23_P434900 | -1.1 | -1.7 | -1.7 | -5.8  | HN1L  | Homo sapiens hematological and neurological expressed 1-like (HN1L), mRNA [NM_144570]   | 90861 |

|              |      |     |      |     |       |                                                                              |      |
|--------------|------|-----|------|-----|-------|------------------------------------------------------------------------------|------|
| A_23_P36757  | 1.7  | 2.1 | -1.4 | 2.6 | HNF1A | Homo sapiens HNF1 homeobox A (HNF1A), mRNA [NM_000545]                       | 6927 |
| A_24_P372913 | 1.0  | 2.1 | 1.5  | 1.8 | HNF1A | Homo sapiens HNF1 homeobox A (HNF1A), mRNA [NM_000545]                       | 6927 |
| A_23_P207557 | 3.1  | 2.2 | 1.1  | 1.7 | HNF1B | HNF1 homeobox B [Source:HGNC Symbol;Acc:11630] [ENST00000459669]             | 6928 |
| A_23_P409287 | -2.6 | 1.4 | 1.3  | 1.0 | HNF1B | Homo sapiens HNF1 homeobox B (HNF1B), transcript variant 1, mRNA [NM_000458] | 6928 |

|              |      |      |      |      |         |                                                                                                 |       |
|--------------|------|------|------|------|---------|-------------------------------------------------------------------------------------------------|-------|
| A_24_P10751  | -1.3 | 2.3  | 1.5  | 1.1  | HNF4A   | Homo sapiens hepatocyte nuclear factor 4, alpha (HNF4A), transcript variant 2, mRNA [NM_000457] | 3172  |
| A_24_P915806 | 1.7  | -2.8 | 1.6  | 2.1  | HNMT    | Homo sapiens histamine N-methyltransferase (HNMT), transcript variant 2, mRNA [NM_001024074]    | 3176  |
| A_24_P371670 | -1.7 | -3.0 | -1.7 | -3.1 | HNRNPA0 | Homo sapiens heterogeneous nuclear ribonucleoprotein A0 (HNRNPA0), mRNA [NM_006805]             | 10949 |
| A_23_P252449 | -1.3 | 4.2  | -2.8 | -1.3 | HNRNPA0 | Homo sapiens heterogeneous nuclear ribonucleoprotein A0 (HNRNPA0), mRNA [NM_006805]             | 10949 |

|              |      |     |      |     |           |                                                                                                                       |        |
|--------------|------|-----|------|-----|-----------|-----------------------------------------------------------------------------------------------------------------------|--------|
| A_24_P454313 | 1.0  | 1.0 | -2.9 | 1.0 | HNRNPA1   | Homo sapiens heterogeneous nuclear ribonucleoprotein A1 (HNRNPA1), transcript variant 2, mRNA [NM_031157]             | 3178   |
| A_32_P168202 | -5.1 | 1.0 | 1.0  | 1.0 | HNRNPA1L2 | Homo sapiens heterogeneous nuclear ribonucleoprotein A1-like 2 (HNRNPA1L2), transcript variant 1, mRNA [NM_001011724] | 144983 |
| A_32_P216426 | 1.8  | 2.4 | 2.1  | 1.4 | HNRNPA1L2 | Homo sapiens heterogeneous nuclear ribonucleoprotein A1-like 2 (HNRNPA1L2), transcript variant 1, mRNA [NM_001011724] | 144983 |

|              |      |      |      |      |           |                                                                                                                  |        |
|--------------|------|------|------|------|-----------|------------------------------------------------------------------------------------------------------------------|--------|
| A_24_P3973   | -2.0 | -1.7 | -1.8 | 2.9  | HNRNPA2B1 | Homo sapiens heterogeneous nuclear ribonucleo protein A2/B1 (HNRNPA2B1), transcript variant A2, mRNA [NM_002137] | 3181   |
| A_24_P488588 | 1.9  | -1.6 | 2.7  | 2.0  | HNRNPA3   | Homo sapiens heterogeneous nuclear ribonucleo protein A3 (HNRNPA3), mRNA [NM_194247]                             | 220988 |
| A_24_P706314 | -3.6 | -1.1 | -1.2 | -1.9 | HNRNPA3   | Homo sapiens heterogeneous nuclear ribonucleo protein A3 (HNRNPA3), mRNA [NM_194247]                             | 220988 |



|              |      |      |      |      |          |                                                                                                                  |        |
|--------------|------|------|------|------|----------|------------------------------------------------------------------------------------------------------------------|--------|
| A_32_P142028 | 1.1  | 1.0  | -1.0 | -2.2 | HNRNPC   | Homo sapiens heterogeneous nuclear ribonucleo protein C (C1/C2) (HNRNPC), transcript variant 1, mRNA [NM_031314] | 3183   |
| A_24_P178423 | 2.4  | 1.1  | -1.0 | 1.3  | HNRNPC   | Homo sapiens heterogeneous nuclear ribonucleo protein C (C1/C2) (HNRNPC), transcript variant 1, mRNA [NM_031314] | 3183   |
| A_24_P767422 | -1.9 | -2.3 | -2.0 | -1.2 | HNRNPCL1 | Homo sapiens heterogeneous nuclear ribonucleo protein C-like 1 (HNRNPCL1), mRNA [NM_001013631]                   | 343069 |

|              |      |      |      |      |         |                                                                                                                                                         |      |
|--------------|------|------|------|------|---------|---------------------------------------------------------------------------------------------------------------------------------------------------------|------|
| A_24_P226037 | 2.7  | 2.0  | -1.1 | -1.7 | HNRNPD  | Homo sapiens heterogeneous nuclear ribonucleo protein D (AU-rich element RNA binding protein 1, 37kDa) (HNRNPD), transcript variant 3, mRNA [NM_002138] | 3184 |
| A_24_P337380 | -2.5 | -4.4 | -2.2 | -1.4 | HNRNPH1 | Homo sapiens heterogeneous nuclear ribonucleo protein H1 (H) (HNRNPH1), mRNA [NM_005520]                                                                | 3187 |
| A_24_P338187 | 2.1  | 1.5  | 1.0  | -1.2 | HNRNPH3 | Homo sapiens heterogeneous nuclear ribonucleo protein H3 (2H9) (HNRNPH3), transcript variant 2H9, mRNA [NM_012207]                                      | 3189 |

|              |      |     |      |      |        |                                                                                                          |       |
|--------------|------|-----|------|------|--------|----------------------------------------------------------------------------------------------------------|-------|
| A_23_P119677 | 1.7  | 2.2 | 2.0  | 2.1  | HNRNPL | Homo sapiens heterogeneous nuclear ribonucleo protein L (HNRNPL), transcript variant 1, mRNA [NM_001533] | 3191  |
| A_32_P109572 | -1.0 | 1.6 | -3.8 | -1.0 | HNRNPL | Homo sapiens heterogeneous nuclear ribonucleo protein L (HNRNPL), transcript variant 1, mRNA [NM_001533] | 3191  |
| A_24_P724984 | 1.1  | 2.3 | 2.2  | 1.8  | HNRNPR | heterogeneous nuclear ribonucleo protein R [Source:HGNC Symbol;Acc:5047] [ENST00000478691]               | 10236 |

|              |      |      |      |      |          |                                                                                                                   |       |
|--------------|------|------|------|------|----------|-------------------------------------------------------------------------------------------------------------------|-------|
| A_23_P502612 | -6.5 | 1.0  | -1.0 | 1.1  | HNRNPUL1 | Homo sapiens heterogeneous nuclear ribonucleo protein U-like 1 (HNRNPUL1), transcript variant 1, mRNA [NM_007040] | 11100 |
| A_24_P108351 | -1.0 | -1.2 | -2.4 | -1.2 | HNRNPUL1 | Homo sapiens heterogeneous nuclear ribonucleo protein U-like 1 (HNRNPUL1), transcript variant 1, mRNA [NM_007040] | 11100 |
| A_23_P213153 | 2.3  | 1.5  | 2.1  | 1.9  | HNRPDL   | Homo sapiens heterogeneous nuclear ribonucleo protein D-like (HNRPDL), transcript variant 2, mRNA [NM_031372]     | 9987  |

|              |      |      |      |       |        |                                                                                                                                               |        |
|--------------|------|------|------|-------|--------|-----------------------------------------------------------------------------------------------------------------------------------------------|--------|
| A_24_P9090   | -2.1 | 1.0  | 1.1  | -20.8 | HNRPDL | Homo sapiens heterogeneous nuclear ribonucleo protein D-like (HNRPDL), transcript variant 2, mRNA [NM_031372]                                 | 9987   |
| A_24_P234214 | 9.5  | 1.0  | 1.0  | 1.0   | HNRPLL | Homo sapiens heterogeneous nuclear ribonucleo protein L-like (HNRPLL), transcript variant 1, mRNA [NM_138394]                                 | 92906  |
| A_23_P364613 | -1.9 | -3.5 | -1.1 | -1.1  | HOGA1  | Homo sapiens 4-hydroxy-2-oxoglutarate aldolase 1 (HOGA1), nuclear gene encoding mitochondrial protein, transcript variant 1, mRNA [NM_138413] | 112817 |

|             |      |      |      |      |        |                                                                                            |       |
|-------------|------|------|------|------|--------|--------------------------------------------------------------------------------------------|-------|
| A_23_P99906 | 6.9  | 10.2 | 7.0  | 5.0  | HOMER2 | Homo sapiens homer homolog 2 (Drosophila) (HOMER2), transcript variant 2, mRNA [NM_199330] | 9455  |
| A_23_P39364 | -1.1 | -1.1 | -3.5 | -1.1 | HOMER3 | Homo sapiens homer homolog 3 (Drosophila) (HOMER3), transcript variant 2, mRNA [NM_004838] | 9454  |
| A_24_P40594 | 1.4  | -5.8 | -1.0 | -1.0 | HOMEZ  | Homo sapiens homeobox and leucine zipper encoding (HOMEZ), mRNA [NM_020834]                | 57594 |

|              |      |      |      |      |       |                                                                                          |       |
|--------------|------|------|------|------|-------|------------------------------------------------------------------------------------------|-------|
| A_23_P114879 | -1.0 | -1.0 | -1.1 | -2.3 | HOOK1 | Homo sapiens hook homolog 1 (Drosophila) (HOOK1), mRNA [NM_015888]                       | 51361 |
| A_23_P153441 | 3.4  | -1.2 | 3.0  | 2.2  | HOOK2 | Homo sapiens hook homolog 2 (Drosophila) (HOOK2), transcript variant 1, mRNA [NM_013312] | 29911 |
| A_23_P314216 | -1.0 | 1.2  | -3.9 | -1.1 | HOOK3 | Homo sapiens hook homolog 3 (Drosophila) (HOOK3), mRNA [NM_032410]                       | 84376 |
| A_32_P49211  | -2.7 | -1.2 | -1.0 | -1.0 | HOOK3 | Homo sapiens hook homolog 3 (Drosophila) (HOOK3), mRNA [NM_032410]                       | 84376 |

|              |      |      |      |      |         |                                                                            |        |
|--------------|------|------|------|------|---------|----------------------------------------------------------------------------|--------|
| A_24_P913146 | 1.0  | 1.3  | -3.0 | 1.0  | HOPX    | Homo sapiens HOP homeobox (HOPX), transcript variant 2, mRNA [NM_139211]   | 84525  |
| A_23_P428366 | -1.2 | -2.4 | 1.3  | -1.3 | HORMAD2 | Homo sapiens HORMA domain containing 2 (HORMAD2), mRNA [NM_152510]         | 150280 |
| A_23_P145752 | 1.0  | -3.5 | -1.0 | -1.1 | HOXA1   | Homo sapiens homeobox A1 (HOXA1), transcript variant 1, mRNA [NM_005522]   | 3198   |
| A_23_P253368 | -4.2 | 1.0  | 1.1  | -1.2 | HOXA10  | Homo sapiens homeobox A10 (HOXA10), transcript variant 1, mRNA [NM_018951] | 3206   |
| A_23_P389281 | -2.9 | -1.9 | -1.8 | 1.2  | HOXA13  | Homo sapiens homeobox A13 (HOXA13), mRNA [NM_000522]                       | 3209   |



|              |      |      |      |      |        |                                                                          |       |
|--------------|------|------|------|------|--------|--------------------------------------------------------------------------|-------|
| A_23_P31306  | 1.4  | -1.1 | 1.2  | -2.4 | HOXA13 | Homo sapiens homeobox A13 (HOXA13), mRNA [NM_000522]                     | 3209  |
| A_24_P200854 | -1.7 | 1.8  | 1.9  | -2.6 | HOXA2  | Homo sapiens homeobox A2 (HOXA2), mRNA [NM_006735]                       | 3199  |
| A_23_P501538 | 1.1  | -1.1 | -3.7 | 1.7  | HOXA3  | Homo sapiens homeobox A3 (HOXA3), transcript variant 2, mRNA [NM_153631] | 3200  |
| A_23_P70968  | -7.4 | -1.0 | -1.1 | -1.0 | HOXA7  | Homo sapiens homeobox A7 (HOXA7), mRNA [NM_006896]                       | 3204  |
| A_23_P4212   | 9.0  | 2.8  | 4.8  | 2.8  | HOXB13 | Homo sapiens homeobox B13 (HOXB13), mRNA [NM_006361]                     | 10481 |

|              |      |      |      |      |        |                                                      |       |
|--------------|------|------|------|------|--------|------------------------------------------------------|-------|
| A_24_P365015 | 1.6  | 1.3  | 2.5  | 1.0  | HOXB13 | Homo sapiens homeobox B13 (HOXB13), mRNA [NM_006361] | 10481 |
| A_23_P316511 | -5.8 | -1.5 | -4.2 | -3.6 | HOXB3  | Homo sapiens homeobox B3 (HOXB3), mRNA [NM_002146]   | 3213  |
| A_23_P100872 | -1.9 | -1.3 | 1.0  | -2.9 | HOXB3  | Homo sapiens homeobox B3 (HOXB3), mRNA [NM_002146]   | 3213  |
| A_24_P305067 | -1.4 | -2.8 | -1.6 | -1.6 | HOXB4  | Homo sapiens homeobox B4 (HOXB4), mRNA [NM_024015]   | 3214  |
| A_23_P363316 | -1.9 | 2.1  | 2.1  | 1.7  | HOXB5  | Homo sapiens homeobox B5 (HOXB5), mRNA [NM_002147]   | 3215  |
| A_23_P49810  | 1.1  | 1.6  | -2.3 | -1.6 | HOXB7  | Homo sapiens homeobox B7 (HOXB7), mRNA [NM_004502]   | 3217  |

|              |      |      |      |      |        |                                                                          |      |
|--------------|------|------|------|------|--------|--------------------------------------------------------------------------|------|
| A_24_P218805 | -3.0 | 1.2  | 1.5  | -1.0 | HOXC10 | Homo sapiens homeobox C10 (HOXC10), mRNA [NM_017409]                     | 3226 |
| A_23_P36546  | -1.7 | 1.1  | -1.6 | -2.3 | HOXC10 | Homo sapiens homeobox C10 (HOXC10), mRNA [NM_017409]                     | 3226 |
| A_23_P150974 | -8.1 | 1.3  | -3.9 | 1.0  | HOXC4  | Homo sapiens homeobox C4 (HOXC4), transcript variant 1, mRNA [NM_014620] | 3221 |
| A_23_P162355 | -1.5 | -6.0 | 1.1  | -1.1 | HOXC5  | Homo sapiens homeobox C5 (HOXC5), transcript variant 1, mRNA [NM_018953] | 3222 |
| A_23_P2344   | -2.5 | 1.4  | -1.5 | 1.2  | HOXC6  | Homo sapiens homeobox C6 (HOXC6), transcript variant 2, mRNA [NM_153693] | 3223 |

|              |       |      |      |      |        |                                                            |      |
|--------------|-------|------|------|------|--------|------------------------------------------------------------|------|
| A_23_P120243 | -2.6  | 1.3  | 1.3  | 1.1  | HOXD1  | Homo sapiens homeobox D1 (HOXD1), mRNA [NM_024501]         | 3231 |
| A_23_P143029 | 1.5   | 1.7  | -3.4 | -1.4 | HOXD11 | Homo sapiens homeobox D11 (HOXD11), mRNA [NM_021192]       | 3237 |
| A_23_P165796 | 1.3   | -1.7 | 2.2  | 1.0  | HOXD13 | Homo sapiens homeobox D13 (HOXD13), mRNA [NM_000523]       | 3239 |
| A_32_P211117 | -10.4 | 3.1  | 2.8  | 2.2  | HOXD3  | homeobox D3 [Source:HGNC Symbol;Acc:5137] [ENST0000459979] | 3232 |
| A_23_P429383 | 1.9   | 2.0  | 2.3  | -1.0 | HOXD9  | Homo sapiens homeobox D9 (HOXD9), mRNA [NM_014213]         | 3235 |

|              |      |      |      |      |        |                                                                                                          |       |
|--------------|------|------|------|------|--------|----------------------------------------------------------------------------------------------------------|-------|
| A_23_P137630 | 1.5  | 1.8  | -2.4 | 1.2  | HP1BP3 | Homo sapiens heterochromatin protein 1, binding protein 3 (HP1BP3), mRNA [NM_016287]                     | 50809 |
| A_23_P5831   | 1.4  | 1.1  | 2.0  | 1.1  | HPCAL1 | Homo sapiens hippocampin-like 1 (HPCAL1), transcript variant 2, mRNA [NM_134421]                         | 3241  |
| A_24_P139665 | -1.1 | -2.5 | 1.1  | 1.0  | HPCAL4 | Homo sapiens hippocampin like 4 (HPCAL4), mRNA [NM_016257]                                               | 51440 |
| A_23_P213050 | -1.1 | -1.1 | -1.1 | -3.1 | HPGD   | Homo sapiens hydroxyprostaglandin dehydrogenase 15- (NAD) (HPGD), transcript variant 1, mRNA [NM_000860] | 3248  |

|              |      |      |      |      |       |                                                                                         |       |
|--------------|------|------|------|------|-------|-----------------------------------------------------------------------------------------|-------|
| A_23_P10506  | 3.2  | -2.1 | 2.9  | -1.0 | HPGDS | Homo sapiens hematopoietic prostaglandin D synthase (HPGDS), mRNA [NM_014485]           | 27306 |
| A_23_P101806 | 2.8  | 2.1  | -1.5 | 2.6  | HPN   | Homo sapiens hepsin (HPN), transcript variant 1, mRNA [NM_182983]                       | 3249  |
| A_24_P415327 | -1.1 | 3.3  | -1.2 | 1.6  | HPS1  | Homo sapiens Hermansky-Pudlak syndrome 1 (HPS1), transcript variant 1, mRNA [NM_000195] | 3257  |
| A_23_P40817  | 1.1  | -2.0 | 1.1  | 1.1  | HPS3  | Homo sapiens Hermansky-Pudlak syndrome 3 (HPS3), mRNA [NM_032383]                       | 84343 |

|              |       |      |      |      |        |                                                                                         |        |
|--------------|-------|------|------|------|--------|-----------------------------------------------------------------------------------------|--------|
| A_23_P98631  | 1.0   | -1.0 | -3.1 | 1.0  | HPS5   | Homo sapiens Hermansky-Pudlak syndrome 5 (HPS5), transcript variant 1, mRNA [NM_181507] | 11234  |
| A_23_P161998 | -12.2 | 1.2  | -1.4 | -1.3 | HPX    | Homo sapiens hemopexin (HPX), mRNA [NM_000613]                                          | 3263   |
| A_24_P911288 | 4.5   | -1.4 | 2.6  | 2.3  | HPX-2  | H.sapiens HPX-2 mRNA. [X74861]                                                          | 652764 |
| A_23_P256131 | -4.0  | -3.0 | -2.8 | -1.8 | HR     | Homo sapiens hairless homolog (mouse) (HR), transcript variant 1, mRNA [NM_005144]      | 55806  |
| A_24_P585676 | 1.0   | -2.2 | -1.5 | -1.2 | HR44   | H.sapiens mRNA for Hr44 protein. [X91103]                                               | 27251  |
| A_23_P57658  | 2.8   | 1.9  | 2.3  | 2.8  | HRASLS | Homo sapiens HRAS-like suppressor (HRASLS), mRNA [NM_020386]                            | 57110  |

|              |      |      |      |      |         |                                                                                                      |        |
|--------------|------|------|------|------|---------|------------------------------------------------------------------------------------------------------|--------|
| A_24_P364263 | 1.0  | 1.3  | -3.6 | -1.0 | HRASLS2 | Homo sapiens HRAS-like suppressor 2 (HRASLS2), mRNA [NM_017878]                                      | 54979  |
| A_23_P416314 | -4.5 | -3.3 | -1.1 | 1.0  | HRASLS5 | Homo sapiens HRAS-like suppressor family, member 5 (HRASLS5), transcript variant 1, mRNA [NM_054108] | 117245 |
| A_23_P53018  | 1.4  | -1.8 | -2.9 | -1.1 | HRASLS5 | Homo sapiens HRAS-like suppressor family, member 5 (HRASLS5), transcript variant 1, mRNA [NM_054108] | 117245 |
| A_23_P142125 | 2.5  | 1.2  | 2.8  | 2.2  | HRC     | Homo sapiens histidine rich calcium binding protein (HRC), mRNA [NM_002152]                          | 3270   |



|              |      |     |      |      |        |                                                                                                    |       |
|--------------|------|-----|------|------|--------|----------------------------------------------------------------------------------------------------|-------|
| A_23_P7535   | -3.4 | 1.0 | -3.9 | -1.0 | HRH2   | Homo sapiens histamine receptor H2 (HRH2), transcript variant 2, mRNA [NM_022304]                  | 3274  |
| A_24_P301837 | -1.9 | 1.1 | -1.9 | 2.7  | HRH3   | Homo sapiens histamine receptor H3 (HRH3), mRNA [NM_007232]                                        | 11255 |
| A_23_P25194  | 1.7  | 1.2 | -1.6 | -3.3 | HRK    | Homo sapiens harakiri, BCL2 interacting protein (contains only BH3 domain) (HRK), mRNA [NM_003806] | 8739  |
| A_23_P134714 | 1.4  | 2.9 | -1.4 | 2.6  | HRSP12 | Homo sapiens heat-responsive protein 12 (HRSP12), mRNA [NM_005836]                                 | 10247 |

|              |      |      |      |      |          |                                                                                                      |       |
|--------------|------|------|------|------|----------|------------------------------------------------------------------------------------------------------|-------|
| A_24_P139943 | 3.0  | 3.8  | 3.8  | 3.7  | HS1BP3   | Homo sapiens HCLS1 binding protein 3 (HS1BP3), mRNA [NM_022460]                                      | 64342 |
| A_23_P200109 | 1.1  | -2.7 | 1.5  | -5.2 | HS2ST1   | Homo sapiens heparan sulfate 2-O-sulfotransferase 1 (HS2ST1), transcript variant 1, mRNA [NM_012262] | 9653  |
| A_23_P118158 | -2.4 | -2.5 | -2.9 | -4.4 | HS3ST2   | Homo sapiens heparan sulfate (glucosamine) 3-O-sulfotransferase 2 (HS3ST2), mRNA [NM_006043]         | 9956  |
| A_23_P77918  | 1.0  | -1.0 | 2.2  | -1.1 | HS3ST3B1 | Homo sapiens heparan sulfate (glucosamine) 3-O-sulfotransferase 3B1 (HS3ST3B1), mRNA [NM_006041]     | 9953  |

|              |      |      |      |      |         |                                                                                                         |        |
|--------------|------|------|------|------|---------|---------------------------------------------------------------------------------------------------------|--------|
| A_23_P9711   | -1.0 | -1.0 | -7.4 | -1.1 | HS3ST4  | Homo sapiens heparan sulfate (glucosamine) 3-O-sulfotransferase 4 (HS3ST4), mRNA [NM_006040]            | 9951   |
| A_24_P58233  | -1.0 | -2.2 | -2.4 | -1.0 | HS6ST2  | Homo sapiens heparan sulfate 6-O-sulfotransferase 2 (HS6ST2), transcript variant L, mRNA [NM_001077188] | 90161  |
| A_32_P46981  | 8.1  | 7.8  | 7.2  | 7.2  | HSBP1L1 | Homo sapiens heat shock factor binding protein 1-like 1 (HSBP1L1), mRNA [NM_001136180]                  | 440498 |
| A_24_P683905 | -1.2 | -1.3 | -1.4 | -2.3 | HSBP1L1 | Homo sapiens cDNA FLJ10967 fis, clone PLACE1000798. [AK001829]                                          | 440498 |

|              |      |      |      |      |          |                                                                                                               |        |
|--------------|------|------|------|------|----------|---------------------------------------------------------------------------------------------------------------|--------|
| A_24_P267552 | -1.7 | 1.4  | -4.1 | -3.5 | HSD11B1L | Homo sapiens hydroxysteroid (11-beta) dehydrogenase 1-like (HSD11B1L), transcript variant e, mRNA [NM_198533] | 374875 |
| A_23_P387374 | 2.2  | -1.1 | 2.9  | -1.1 | HSD17B1  | Homo sapiens, clone IMAGE:4915712, mRNA. [BC019592]                                                           | 3292   |
| A_23_P15542  | -3.2 | -1.0 | -1.0 | 1.0  | HSD17B1  | Homo sapiens hydroxysteroid (17-beta) dehydrogenase 1 (HSD17B1), mRNA [NM_000413]                             | 3292   |
| A_23_P408271 | -1.1 | -1.1 | -4.4 | -1.2 | HSD17B11 | Homo sapiens hydroxysteroid (17-beta) dehydrogenase 11 (HSD17B11), mRNA [NM_016245]                           | 51170  |

|              |      |      |      |      |          |                                                                                                                      |       |
|--------------|------|------|------|------|----------|----------------------------------------------------------------------------------------------------------------------|-------|
| A_24_P392774 | -1.4 | -2.1 | -1.0 | -1.0 | HSD17B12 | Homo sapiens hydroxysteroid (17-beta) dehydrogenase 12 (HSD17B12), mRNA [NM_016142]                                  | 51144 |
| A_23_P78762  | -1.4 | -2.1 | 1.7  | 1.4  | HSD17B14 | Homo sapiens hydroxysteroid (17-beta) dehydrogenase 14 (HSD17B14), mRNA [NM_016246]                                  | 51171 |
| A_23_P97173  | -5.5 | -1.4 | -8.7 | 1.0  | HSD3B1   | Homo sapiens hydroxy-delta-5-steroid dehydrogenase, 3 beta- and steroid delta-isomerase 1 (HSD3B1), mRNA [NM_000862] | 3283  |

|              |      |       |      |      |        |                                                                                                                                            |       |
|--------------|------|-------|------|------|--------|--------------------------------------------------------------------------------------------------------------------------------------------|-------|
| A_23_P206819 | -2.7 | -30.5 | 1.7  | 1.0  | HSD3B7 | Homo sapiens hydroxy-delta-5-steroid dehydrogenase, 3 beta- and steroid delta-isomerase 7 (HSD3B7), transcript variant 1, mRNA [NM_025193] | 80270 |
| A_23_P169197 | 1.5  | 2.7   | 1.5  | 1.6  | HSDL2  | Homo sapiens hydroxysteroid dehydrogenase like 2 (HSDL2), transcript variant 1, mRNA [NM_032303]                                           | 84263 |
| A_23_P253841 | 1.0  | -1.0  | -3.8 | -1.0 | HSF1   | Homo sapiens heat shock transcription factor 1 (HSF1), mRNA [NM_005526]                                                                    | 3297  |

|              |     |      |      |      |        |                                                                                           |           |
|--------------|-----|------|------|------|--------|-------------------------------------------------------------------------------------------|-----------|
| A_23_P143512 | 1.0 | -1.0 | -8.5 | -1.1 | HSF2BP | Homo sapiens heat shock transcription factor 2 binding protein (HSF2BP), mRNA [NM_007031] | 11077     |
| A_32_P109270 | 3.6 | 2.4  | 2.6  | 2.7  | HSF5   | Homo sapiens heat shock transcription factor family member 5 (HSF5), mRNA [NM_001080439]  | 124535    |
| A_23_P96497  | 1.1 | 1.1  | 2.2  | 1.5  | HSFX1  | Homo sapiens heat shock transcription factor family, X linked 1 (HSFX1), mRNA [NM_016153] | 100506164 |

|              |      |      |      |      |          |                                                                                                                                 |      |
|--------------|------|------|------|------|----------|---------------------------------------------------------------------------------------------------------------------------------|------|
| A_24_P145377 | 2.6  | 1.5  | 1.7  | 4.2  | HSP90AA1 | Homo sapiens heat shock protein 90kDa alpha (cytosolic), class A member 1 (HSP90AA1), transcript variant 1, mRNA [NM_001017963] | 3320 |
| A_24_P170295 | -1.1 | -1.1 | -2.9 | -1.2 | HSP90AB1 | Homo sapiens heat shock protein 90kDa alpha (cytosolic), class B member 1 (HSP90AB1), mRNA [NM_007355]                          | 3326 |



|              |      |      |      |      |           |                                                                                                                               |        |
|--------------|------|------|------|------|-----------|-------------------------------------------------------------------------------------------------------------------------------|--------|
| A_24_P161525 | 1.4  | 2.6  | 1.3  | -1.0 | HSP90AB3P | Homo sapiens heat shock protein 90kDa alpha (cytosolic), class B member 3, pseudogene (HSP90AB3P), non-coding RNA [NR_036694] | 3327   |
| A_24_P531133 | 1.7  | 4.6  | -1.0 | -1.1 | HSP90AB6P | Homo sapiens heat shock protein 90Bf (HSP90Bf) mRNA, complete cds. [AY956767]                                                 | 541611 |
| A_24_P150361 | -2.5 | -2.6 | -2.0 | -1.4 | HSP90B1   | Homo sapiens heat shock protein 90kDa beta (Grp94), member 1 (HSP90B1), mRNA [NM_003299]                                      | 7184   |

|              |      |      |      |      |        |                                                                                                      |      |
|--------------|------|------|------|------|--------|------------------------------------------------------------------------------------------------------|------|
| A_24_P134392 | -1.0 | -1.0 | -1.0 | -2.4 | HSPA13 | Homo sapiens heat shock protein 70kDa family, member 13 (HSPA13), mRNA [NM_006948]                   | 6782 |
| A_23_P70547  | 1.0  | 1.0  | -3.1 | 1.0  | HSPA1L | Homo sapiens heat shock 70kDa protein 1-like (HSPA1L), mRNA [NM_005527]                              | 3305 |
| A_24_P18190  | -2.7 | -2.9 | -3.4 | -2.7 | HSPA5  | Homo sapiens heat shock 70kDa protein 5 (glucose-regulated protein, 78kDa) (HSPA5), mRNA [NM_005347] | 3309 |

|              |      |      |      |      |       |                                                                                         |      |
|--------------|------|------|------|------|-------|-----------------------------------------------------------------------------------------|------|
| A_23_P114903 | 8.6  | 6.0  | 8.4  | 3.9  | HSPA6 | Homo sapiens heat shock 70kDa protein 6 (HSP70B') (HSPA6), mRNA [NM_002155]             | 3310 |
| A_32_P13728  | 1.3  | 1.1  | 1.0  | -3.0 | HSPA8 | Homo sapiens heat shock 70kDa protein 8 (HSPA8), transcript variant 1, mRNA [NM_006597] | 3312 |
| A_24_P295745 | -1.5 | -2.0 | -1.4 | 1.0  | HSPA8 | Homo sapiens heat shock 70kDa protein 8 (HSPA8), transcript variant 2, mRNA [NM_153201] | 3312 |

|             |      |      |      |      |       |                                                                                                                           |      |
|-------------|------|------|------|------|-------|---------------------------------------------------------------------------------------------------------------------------|------|
| A_24_P77676 | 30.0 | 26.1 | 26.6 | 27.6 | HSPA9 | Homo sapiens heat shock 70kDa protein 9 (mortalin) (HSPA9), nuclear gene encoding mitochondrial protein, mRNA [NM_004134] | 3313 |
| A_32_P76247 | 1.1  | -2.5 | -5.3 | -6.0 | HSPB1 | Homo sapiens heat shock 27kDa protein 1 (HSPB1), mRNA [NM_001540]                                                         | 3315 |
| A_24_P86537 | 2.0  | 1.5  | 1.9  | -1.7 | HSPB1 | Homo sapiens heat shock 27kDa protein 1 (HSPB1), mRNA [NM_001540]                                                         | 3315 |

|              |      |      |      |      |        |                                                                                         |       |
|--------------|------|------|------|------|--------|-----------------------------------------------------------------------------------------|-------|
| A_23_P96872  | 1.5  | 2.1  | 1.3  | -1.1 | HSPB11 | Homo sapiens heat shock protein family B (small), member 11 (HSPB11), mRNA [NM_016126]  | 51668 |
| A_23_P161727 | -2.4 | -2.4 | -2.0 | -2.1 | HSPB2  | Homo sapiens heat shock 27kDa protein 2 (HSPB2), mRNA [NM_001541]                       | 3316  |
| A_23_P416212 | -1.7 | -1.1 | 1.2  | -2.9 | HSPB9  | Homo sapiens heat shock protein, alpha-crystallin-related, B9 (HSPB9), mRNA [NM_033194] | 94086 |

|             |      |      |      |      |        |                                                                                                                                  |       |
|-------------|------|------|------|------|--------|----------------------------------------------------------------------------------------------------------------------------------|-------|
| A_23_P49725 | -3.8 | 1.1  | -2.1 | -1.1 | HSPB9  | Homo sapiens heat shock protein, alpha-crystallin-related, B9 (HSPB9), mRNA [NM_033194]                                          | 94086 |
| A_23_P10685 | 1.6  | -3.7 | 1.7  | 1.2  | HSPBP1 | Homo sapiens HSPA (heat shock 70kDa) binding protein, cytoplasmic cochaperone 1 (HSPBP1), transcript variant 1, mRNA [NM_012267] | 23640 |

|              |      |      |      |      |         |                                                                                                                                  |           |
|--------------|------|------|------|------|---------|----------------------------------------------------------------------------------------------------------------------------------|-----------|
| A_23_P170687 | -1.3 | -2.0 | -3.0 | -1.4 | HSPBP1  | Homo sapiens HSPA (heat shock 70kDa) binding protein, cytoplasmic cochaperone 1 (HSPBP1), transcript variant 1, mRNA [NM_012267] | 23640     |
| A_23_P68577  | -1.0 | -1.0 | 1.0  | -2.0 | HSPC072 | Homo sapiens uncharacterized LOC29075 (HSPC072), transcript variant 1, non-coding RNA [NR_026883]                                | 29075     |
| A_24_P59297  | -1.8 | 1.5  | -2.4 | -1.2 | HSPC081 | Homo sapiens HSPC081 mRNA, partial cds. [AF161344]                                                                               | 100286989 |

|             |      |      |      |      |       |                                                                                                                                                   |       |
|-------------|------|------|------|------|-------|---------------------------------------------------------------------------------------------------------------------------------------------------|-------|
| A_32_P76091 | -1.4 | -1.5 | -2.2 | -1.5 | HSPD1 | Homo sapiens heat shock 60kDa protein 1 (chaperonin) (HSPD1), nuclear gene encoding mitochondrial protein, transcript variant 1, mRNA [NM_002156] | 3329  |
| A_23_P88119 | 1.0  | 1.0  | -3.1 | 1.1  | HSPH1 | Homo sapiens heat shock 105kDa/10kDa protein 1 (HSPH1), mRNA [NM_006644]                                                                          | 10808 |



|              |     |      |      |      |           |                                                                                                                                      |        |
|--------------|-----|------|------|------|-----------|--------------------------------------------------------------------------------------------------------------------------------------|--------|
| A_32_P135890 | 1.0 | -2.3 | 1.0  | -1.0 | HTATSF1P2 | Homo sapiens cDNA FLJ46534 fis, clone THYMU30 37052, weakly similar to Homo sapiens HIV TAT specific factor 1 (HTATSF1) . [AK128391] | 401233 |
| A_24_P354429 | 3.0 | 2.3  | 1.2  | 1.3  | HTN1      | Homo sapiens histatin 1 (HTN1), mRNA [NM_002159]                                                                                     | 3346   |
| A_24_P97687  | 1.0 | -1.9 | -5.7 | -1.0 | HTR1A     | Homo sapiens 5-hydroxytryptamine (serotonin) receptor 1A (HTR1A), mRNA [NM_000524]                                                   | 3350   |
| A_23_P156824 | 1.4 | 4.1  | 3.7  | 2.4  | HTR1B     | Homo sapiens 5-hydroxytryptamine (serotonin) receptor 1B (HTR1B), mRNA [NM_000863]                                                   | 3351   |

|              |      |      |      |      |       |                                                                                                          |      |
|--------------|------|------|------|------|-------|----------------------------------------------------------------------------------------------------------|------|
| A_23_P166674 | 1.1  | 1.1  | -4.7 | 1.2  | HTR1F | Homo sapiens 5-hydroxytryptamine (serotonin) receptor 1F (HTR1F), mRNA [NM_000866]                       | 3355 |
| A_24_P355967 | 1.0  | -2.1 | -5.0 | 1.6  | HTR2A | Homo sapiens 5-hydroxytryptamine (serotonin) receptor 2A (HTR2A), transcript variant 1, mRNA [NM_000621] | 3356 |
| A_24_P150068 | 1.0  | 1.0  | 1.5  | 2.7  | HTR3A | Homo sapiens 5-hydroxytryptamine (serotonin) receptor 3A (HTR3A), transcript variant 1, mRNA [NM_213621] | 3359 |
| A_23_P87007  | -1.1 | -3.0 | -1.0 | -1.0 | HTR3B | Homo sapiens 5-hydroxytryptamine (serotonin) receptor 3B (HTR3B), mRNA [NM_006028]                       | 9177 |

|              |      |      |      |      |       |                                                                                                           |        |
|--------------|------|------|------|------|-------|-----------------------------------------------------------------------------------------------------------|--------|
| A_23_P124402 | 1.8  | 2.3  | 1.5  | -1.1 | HTR3C | Homo sapiens 5-hydroxytryptamine (serotonin) receptor 3, family member C (HTR3C), mRNA [NM_130770]        | 170572 |
| A_24_P32139  | -1.0 | 2.2  | -4.7 | 1.6  | HTR3E | Homo sapiens 5-hydroxytryptamine (serotonin) receptor 3, family member E (HTR3E), mRNA [NM_182589]        | 285242 |
| A_23_P133637 | -2.5 | -2.3 | -2.3 | -1.4 | HTR4  | Homo sapiens 5-hydroxytryptamine (serotonin) receptor 4 (HTR4), transcript variant d, mRNA [NM_001040172] | 3360   |
| A_24_P234768 | -1.0 | -1.0 | -1.0 | -3.2 | HTR4  | Homo sapiens 5-hydroxytryptamine (serotonin) receptor 4 (HTR4), transcript variant i, mRNA [NM_001040173] | 3360   |

|              |       |      |      |      |        |                                                                                                           |       |
|--------------|-------|------|------|------|--------|-----------------------------------------------------------------------------------------------------------|-------|
| A_23_P42565  | -12.3 | 1.2  | 1.2  | -1.0 | HTR5A  | Homo sapiens 5-hydroxytryptamine (serotonin) receptor 5A (HTR5A), mRNA [NM_024012]                        | 3361  |
| A_24_P375819 | 1.4   | 2.2  | 2.5  | 1.9  | HTR7P1 | Homo sapiens 5-hydroxytryptamine (serotonin) receptor 7 pseudogene 1 (HTR7P1), non-coding RNA [NR_002774] | 93164 |
| A_23_P97990  | -9.6  | -1.0 | -1.1 | -1.1 | HTRA1  | Homo sapiens HtrA serine peptidase 1 (HTRA1), mRNA [NM_002775]                                            | 5654  |
| A_23_P10542  | -1.3  | -2.2 | -1.3 | -1.2 | HTRA3  | Homo sapiens HtrA serine peptidase 3 (HTRA3), mRNA [NM_053044]                                            | 94031 |

|              |      |      |      |      |       |                                                                                     |       |
|--------------|------|------|------|------|-------|-------------------------------------------------------------------------------------|-------|
| A_23_P166235 | 1.5  | 2.6  | 1.5  | -1.0 | HUNK  | Homo sapiens hormonally up-regulated Neu-associated kinase (HUNK), mRNA [NM_014586] | 30811 |
| A_23_P219207 | 2.7  | -1.1 | 2.1  | -1.7 | HUWE1 | Homo sapiens HECT, UBA and WWE domain containing 1 (HUWE1), mRNA [NM_031407]        | 10075 |
| A_24_P310667 | -1.9 | -1.1 | -4.9 | -3.6 | HUWE1 | Homo sapiens HECT, UBA and WWE domain containing 1 (HUWE1), mRNA [NM_031407]        | 10075 |

|              |     |      |      |     |       |                                                                                                               |       |
|--------------|-----|------|------|-----|-------|---------------------------------------------------------------------------------------------------------------|-------|
| A_24_P153820 | 1.0 | -3.5 | 2.4  | 2.4 | HYDIN | Homo sapiens hydrocephalus inducing homolog (mouse), mRNA (cDNA clone IMAGE:4837075), partial cds. [BC028351] | 54768 |
| A_23_P383679 | 2.2 | 3.6  | 1.2  | 4.5 | HYDIN | Homo sapiens hydrocephalus inducing homolog (mouse) (HYDIN), transcript variant 1, mRNA [NM_032821]           | 54768 |
| A_23_P160582 | 1.2 | 2.2  | -1.3 | 2.9 | HYI   | Homo sapiens hydroxypyruvate isomerase (putative) (HYI), transcript variant 1, mRNA [NM_031207]               | 81888 |

|              |      |      |      |     |       |                                                                                                       |        |
|--------------|------|------|------|-----|-------|-------------------------------------------------------------------------------------------------------|--------|
| A_23_P75647  | 1.4  | 1.3  | -2.3 | 1.3 | HYOU1 | Homo sapiens hypoxia up-regulated 1 (HYOU1), transcript variant 1, mRNA [NM_006389]                   | 10525  |
| A_32_P436884 | 2.5  | 4.0  | 4.9  | 1.0 | IBA57 | Homo sapiens IBA57, iron-sulfur cluster assembly homolog (S. cerevisiae) (IBA57), mRNA [NM_001010867] | 200205 |
| A_23_P144549 | -6.9 | 2.0  | 2.9  | 2.2 | IBSP  | Homo sapiens integrin-binding sialoprotein (IBSP), mRNA [NM_004967]                                   | 3381   |
| A_23_P358995 | -1.8 | -2.5 | -1.0 | 1.1 | IBTK  | Homo sapiens inhibitor of Bruton agammaglobulinemia tyrosine kinase (IBTK), mRNA [NM_015525]          | 25998  |

|              |       |      |      |      |       |                                                                                                   |        |
|--------------|-------|------|------|------|-------|---------------------------------------------------------------------------------------------------|--------|
| A_23_P215419 | 3.3   | 1.6  | -1.1 | -1.9 | ICA1  | Homo sapiens islet cell autoantigen 1, 69kDa (ICA1), transcript variant 2, mRNA [NM_004968]       | 3382   |
| A_24_P372012 | -1.3  | -3.3 | -4.2 | -3.0 | ICA1  | Homo sapiens islet cell autoantigen 1, 69kDa (ICA1), transcript variant 2, mRNA [NM_004968]       | 3382   |
| A_23_P430168 | -31.1 | 1.0  | -1.0 | 1.1  | ICA1L | Homo sapiens islet cell autoantigen 1, 69kDa-like (ICA1L), transcript variant 2, mRNA [NM_178231] | 130026 |



|              |       |      |      |      |        |                                                                                                  |        |
|--------------|-------|------|------|------|--------|--------------------------------------------------------------------------------------------------|--------|
| A_23_P17224  | 1.3   | 1.5  | -2.2 | -3.6 | ICA1L  | Homo sapiens islet cell autoantigen 1,69kDa-like (ICA1L), transcript variant 1, mRNA [NM_138468] | 130026 |
| A_24_P254079 | -1.0  | 2.2  | 2.3  | 1.0  | ICAM5  | Homo sapiens intercellular adhesion molecule 5, telencephalin (ICAM5), mRNA [NM_003259]          | 7087   |
| A_23_P104065 | -15.4 | 1.1  | 1.0  | 1.0  | ICMT   | Homo sapiens isoprenylcysteine carboxyl methyltransferase (ICMT), mRNA [NM_012405]               | 23463  |
| A_23_P166280 | -1.7  | -1.2 | -2.7 | 1.2  | ICOSLG | inducible T-cell co-stimulator ligand [Source:HGNC Symbol;Acc:17087] [ENST00000407780]           | 23308  |

|              |     |     |      |      |        |                                                                                                             |       |
|--------------|-----|-----|------|------|--------|-------------------------------------------------------------------------------------------------------------|-------|
| A_23_P6272   | 6.5 | 7.9 | 8.0  | 2.8  | ICOSLG | Homo sapiens inducible T-cell co-stimulator ligand (ICOSLG), mRNA [NM_015259]                               | 23308 |
| A_32_P69368  | 1.7 | 2.4 | 2.5  | -1.0 | ID2    | Homo sapiens inhibitor of DNA binding 2, dominant negative helix-loop-helix protein (ID2), mRNA [NM_002166] | 3398  |
| A_23_P137381 | 1.3 | 3.0 | -1.5 | -1.7 | ID3    | Homo sapiens inhibitor of DNA binding 3, dominant negative helix-loop-helix protein (ID3), mRNA [NM_002167] | 3399  |

|              |      |      |      |      |      |                                                                                                             |       |
|--------------|------|------|------|------|------|-------------------------------------------------------------------------------------------------------------|-------|
| A_23_P59375  | 2.1  | 1.3  | -3.3 | 2.5  | ID4  | Homo sapiens inhibitor of DNA binding 4, dominant negative helix-loop-helix protein (ID4), mRNA [NM_001546] | 3400  |
| A_23_P410600 | -1.1 | 2.4  | 2.3  | -1.9 | IDI2 | Homo sapiens isopentenyl-diphosphate delta isomerase 2 (IDI2), mRNA [NM_033261]                             | 91734 |
| A_23_P112026 | -2.3 | 1.0  | -1.0 | -1.0 | IDO1 | Homo sapiens indoleamine 2,3-dioxygenase 1 (IDO1), mRNA [NM_002164]                                         | 3620  |
| A_24_P285032 | -2.3 | -1.0 | 1.7  | -1.0 | IDS  | Homo sapiens iduronate 2-sulfatase (IDS), transcript variant 2, mRNA [NM_006123]                            | 3423  |

|              |      |      |      |      |         |                                                                                                       |       |
|--------------|------|------|------|------|---------|-------------------------------------------------------------------------------------------------------|-------|
| A_23_P42257  | 2.1  | 1.9  | 1.5  | -1.0 | IER3    | Homo sapiens immediate early response 3 (IER3), mRNA [NM_003897]                                      | 8870  |
| A_32_P126928 | 1.0  | -4.8 | 1.0  | -3.6 | IER3IP1 | Homo sapiens PRO2309 mRNA, complete cds. [AF119875]                                                   | 51124 |
| A_24_P379223 | -2.1 | -2.2 | -1.0 | -2.1 | IER5    | Homo sapiens immediate early response 5 (IER5), mRNA [NM_016545]                                      | 51278 |
| A_23_P87742  | 1.0  | 1.3  | -1.5 | -4.6 | IFFO1   | Homo sapiens intermediate filament family orphan 1 (IFFO1), transcript variant 4, mRNA [NM_001039670] | 25900 |

|              |      |      |      |      |         |                                                                                                              |        |
|--------------|------|------|------|------|---------|--------------------------------------------------------------------------------------------------------------|--------|
| A_23_P418031 | -2.1 | -1.6 | -2.0 | -1.2 | IFFO2   | Homo sapiens intermediate filament family orphan 2 (IFFO2), mRNA [NM_001136265]                              | 126917 |
| A_23_P160025 | 1.5  | -1.6 | 1.3  | -3.4 | IFI16   | Homo sapiens interferon, gamma-inducible protein 16 (IFI16), transcript variant 2, mRNA [NM_005531]          | 3428   |
| A_24_P261929 | 3.0  | 2.3  | 2.7  | 1.0  | IFI27L1 | Homo sapiens interferon, alpha-inducible protein 27-like 1 (IFI27L1), transcript variant 2, mRNA [NM_206949] | 122509 |
| A_23_P140146 | 3.4  | 4.2  | 2.5  | 6.1  | IFI27L2 | Homo sapiens interferon, alpha-inducible protein 27-like 2 (IFI27L2), mRNA [NM_032036]                       | 83982  |

|              |      |       |      |      |       |                                                                                                                          |       |
|--------------|------|-------|------|------|-------|--------------------------------------------------------------------------------------------------------------------------|-------|
| A_23_P153745 | -1.9 | -1.1  | -7.7 | -2.0 | IFI30 | Homo sapiens interferon, gamma-inducible protein 30 (IFI30), mRNA [NM_006332]                                            | 10437 |
| A_23_P152782 | 1.3  | 1.5   | 1.4  | 6.4  | IFI35 | Homo sapiens interferon-induced protein 35 (IFI35), mRNA [NM_005533]                                                     | 3430  |
| A_23_P52266  | 2.5  | 2.1   | 1.4  | 1.1  | IFIT1 | Homo sapiens interferon-induced protein with tetratricopeptide repeats 1 (IFIT1), transcript variant 2, mRNA [NM_001548] | 3434  |
| A_23_P24004  | 1.1  | -36.4 | -1.0 | -1.0 | IFIT2 | Homo sapiens interferon-induced protein with tetratricopeptide repeats 2 (IFIT2), mRNA [NM_001547]                       | 3433  |

|              |      |      |      |      |       |                                                                                                                          |       |
|--------------|------|------|------|------|-------|--------------------------------------------------------------------------------------------------------------------------|-------|
| A_24_P304071 | -9.5 | -1.0 | -1.0 | 1.0  | IFIT2 | Homo sapiens interferon-induced protein with tetratricopeptide repeats 2 (IFIT2), mRNA [NM_001547]                       | 3433  |
| A_23_P35412  | 1.3  | 1.3  | -2.1 | 1.3  | IFIT3 | Homo sapiens interferon-induced protein with tetratricopeptide repeats 3 (IFIT3), transcript variant 1, mRNA [NM_001549] | 3437  |
| A_23_P63668  | -4.6 | 1.2  | -3.2 | -1.1 | IFIT5 | Homo sapiens interferon-induced protein with tetratricopeptide repeats 5 (IFIT5), mRNA [NM_012420]                       | 24138 |

|              |      |      |      |      |        |                                                                                                              |        |
|--------------|------|------|------|------|--------|--------------------------------------------------------------------------------------------------------------|--------|
| A_24_P287043 | 1.7  | 1.5  | 2.3  | 1.0  | IFITM2 | Homo sapiens interferon induced transmembrane protein 2 (1-8D) (IFITM2), mRNA [NM_006435]                    | 10581  |
| A_23_P87545  | -2.0 | -2.4 | -1.3 | -1.4 | IFITM3 | Homo sapiens interferon induced transmembrane protein 3 (IFITM3), mRNA [NM_021034]                           | 10410  |
| A_23_P311050 | -1.1 | -1.4 | -3.0 | -1.2 | IFLTD1 | Homo sapiens intermediate filament tail domain containing 1 (IFLTD1), transcript variant 2, mRNA [NM_152590] | 160492 |
| A_23_P250251 | 2.1  | 1.1  | -2.2 | -1.4 | IFNA2  | Homo sapiens interferon, alpha 2 (IFNA2), mRNA [NM_000605]                                                   | 3440   |



|              |      |      |      |      |        |                                                                                                             |       |
|--------------|------|------|------|------|--------|-------------------------------------------------------------------------------------------------------------|-------|
| A_24_P386375 | -1.2 | -3.8 | -1.4 | -1.3 | IFNA21 | Homo sapiens interferon, alpha 21 (IFNA21), mRNA [NM_002175]                                                | 3452  |
| A_23_P29036  | -4.8 | 1.1  | 1.3  | -1.2 | IFNGR2 | Homo sapiens interferon gamma receptor 2 (interferon gamma transducer 1) (IFNGR2), mRNA [NM_005534]         | 3460  |
| A_23_P310372 | -2.2 | -1.0 | -1.1 | -1.0 | IFNK   | Homo sapiens interferon, kappa (IFNK), mRNA [NM_020124]                                                     | 56832 |
| A_24_P137897 | -2.4 | -1.3 | -1.5 | -1.7 | IFRD1  | Homo sapiens interferon-related developmental regulator 1 (IFRD1), transcript variant 2, mRNA [NM_00107245] | 3475  |

|              |      |      |      |      |        |                                                                                                                    |       |
|--------------|------|------|------|------|--------|--------------------------------------------------------------------------------------------------------------------|-------|
| A_23_P92132  | 1.1  | -5.1 | -1.0 | -1.0 | IFRD2  | Homo sapiens interferon-related developmental regulator 2 (IFRD2), mRNA [NM_006764]                                | 7866  |
| A_23_P212447 | -1.2 | 1.4  | -3.4 | 1.3  | IFT122 | Homo sapiens intraflagellar transport 122 homolog (Chlamydomonas) (IFT122), transcript variant 3, mRNA [NM_018262] | 55764 |
| A_23_P406135 | -1.0 | 3.0  | 2.0  | 1.2  | IFT172 | Homo sapiens intraflagellar transport 172 homolog (Chlamydomonas) (IFT172), mRNA [NM_015662]                       | 26160 |

|              |      |     |      |      |       |                                                                                                                  |       |
|--------------|------|-----|------|------|-------|------------------------------------------------------------------------------------------------------------------|-------|
| A_23_P6447   | -6.5 | 1.2 | 1.1  | 1.2  | IFT27 | Homo sapiens intraflagellar transport 27 homolog (Chlamydomonas) (IFT27), transcript variant 2, mRNA [NM_006860] | 11020 |
| A_23_P165962 | 1.1  | 1.1 | 1.1  | -4.1 | IFT52 | Homo sapiens intraflagellar transport 52 homolog (Chlamydomonas) (IFT52), mRNA [NM_016004]                       | 51098 |
| A_23_P121386 | 1.4  | 1.4 | -4.6 | 1.1  | IFT57 | Homo sapiens intraflagellar transport 57 homolog (Chlamydomonas) (IFT57), mRNA [NM_018010]                       | 55081 |

|              |      |       |      |      |       |                                                                                                                  |       |
|--------------|------|-------|------|------|-------|------------------------------------------------------------------------------------------------------------------|-------|
| A_23_P255714 | 2.8  | 1.8   | 3.3  | 1.5  | IFT74 | Homo sapiens intraflagellar transport 74 homolog (Chlamydomonas) (IFT74), transcript variant 1, mRNA [NM_025103] | 80173 |
| A_23_P406013 | 1.0  | -3.7  | 2.7  | 1.3  | IFT80 | Homo sapiens intraflagellar transport 80 homolog (Chlamydomonas) (IFT80), transcript variant 1, mRNA [NM_020800] | 57560 |
| A_24_P164123 | -1.0 | -17.4 | -1.0 | -1.0 | IFT81 | intraflagellar transport 81 homolog (Chlamydomonas) [Source:HGNC Symbol;Acc:14313] [ENST00000361948]             | 28981 |

|              |      |      |      |      |        |                                                                                            |       |
|--------------|------|------|------|------|--------|--------------------------------------------------------------------------------------------|-------|
| A_23_P171249 | 1.1  | 1.0  | 3.3  | -1.0 | IGBP1  | Homo sapiens immunoglobulin (CD79A) binding protein 1 (IGBP1), mRNA [NM_001551]            | 3476  |
| A_24_P202025 | 1.6  | 1.8  | -2.7 | 1.0  | IGDCC4 | Homo sapiens immunoglobulin superfamily, DCC subclass, member 4 (IGDCC4), mRNA [NM_020962] | 57722 |
| A_23_P417282 | -3.3 | -2.7 | 2.0  | 1.1  | IGF1R  | Homo sapiens insulin-like growth factor 1 receptor (IGF1R), mRNA [NM_000875]               | 3480  |
| A_24_P936758 | 2.0  | 2.5  | 1.2  | -1.4 | IGF2   | Homo sapiens cDNA FLJ90133 fis, clone HEMBB1000567. [AK074614]                             | 3481  |

|              |      |      |       |      |         |                                                                                                                    |       |
|--------------|------|------|-------|------|---------|--------------------------------------------------------------------------------------------------------------------|-------|
| A_23_P343954 | -1.1 | -2.5 | 2.1   | 1.4  | IGF2BP1 | Homo sapiens insulin-like growth factor 2 mRNA binding protein 1 (IGF2BP1), transcript variant 1, mRNA [NM_006546] | 10642 |
| A_23_P250156 | -2.2 | -2.7 | -1.5  | -2.4 | IGF2BP2 | Homo sapiens insulin-like growth factor 2 mRNA binding protein 2 (IGF2BP2), transcript variant 1, mRNA [NM_006548] | 10644 |
| A_23_P334021 | -1.1 | -1.7 | -11.8 | 1.0  | IGF2R   | Homo sapiens insulin-like growth factor 2 receptor (IGF2R), mRNA [NM_000876]                                       | 3482  |

|              |      |     |      |      |        |                                                                                                               |      |
|--------------|------|-----|------|------|--------|---------------------------------------------------------------------------------------------------------------|------|
| A_23_P156953 | 1.1  | 1.1 | 2.5  | 1.3  | IGF2R  | Homo sapiens insulin-like growth factor 2 receptor (IGF2R), mRNA [NM_000876]                                  | 3482 |
| A_23_P119943 | 2.1  | 1.9 | 2.7  | 2.7  | IGFBP2 | Homo sapiens insulin-like growth factor binding protein 2, 36kDa (IGFBP2), mRNA [NM_000597]                   | 3485 |
| A_24_P320699 | -2.6 | 1.6 | -2.0 | -2.1 | IGFBP3 | Homo sapiens insulin-like growth factor binding protein 3 (IGFBP3), transcript variant 1, mRNA [NM_001013398] | 3486 |

|              |      |      |      |      |        |                                                                                      |      |
|--------------|------|------|------|------|--------|--------------------------------------------------------------------------------------|------|
| A_24_P382187 | -1.4 | -3.7 | -3.7 | -2.9 | IGFBP4 | Homo sapiens insulin-like growth factor binding protein 4 (IGFBP4), mRNA [NM_001552] | 3487 |
| A_23_P376497 | 2.5  | 3.1  | -1.0 | -2.1 | IGFBP5 | Homo sapiens insulin-like growth factor binding protein 5 (IGFBP5), mRNA [NM_000599] | 3488 |
| A_23_P383009 | -1.0 | -4.4 | -2.7 | 1.0  | IGFBP5 | Homo sapiens insulin-like growth factor binding protein 5 (IGFBP5), mRNA [NM_000599] | 3488 |
| A_23_P154115 | -1.2 | -2.6 | 1.5  | -1.1 | IGFBP5 | Homo sapiens insulin-like growth factor binding protein 5 (IGFBP5), mRNA [NM_000599] | 3488 |



|              |       |     |      |      |         |                                                                                                            |        |
|--------------|-------|-----|------|------|---------|------------------------------------------------------------------------------------------------------------|--------|
| A_23_P353035 | -1.3  | 1.1 | -2.1 | -1.0 | IGFBP7  | Homo sapiens insulin-like growth factor binding protein 7 (IGFBP7), mRNA [NM_001553]                       | 3490   |
| A_24_P186274 | 2.9   | 2.9 | 1.3  | -1.0 | IGFBPL1 | Homo sapiens insulin-like growth factor binding protein-like 1 (IGFBPL1), mRNA [NM_001007563]              | 347252 |
| A_23_P142424 | -21.8 | 2.1 | 3.0  | 1.0  | IGFLR1  | Homo sapiens IGF-like family receptor 1 (IGFLR1), mRNA [NM_024660]                                         | 79713  |
| A_32_P425998 | 1.1   | 1.1 | 1.1  | -3.1 | IGFN1   | Homo sapiens immunoglobulin-like and fibronectin type III domain containing 1 (IGFN1), mRNA [NM_001164586] | 91156  |

|              |      |      |     |      |       |                                                                                                                                |      |
|--------------|------|------|-----|------|-------|--------------------------------------------------------------------------------------------------------------------------------|------|
| A_23_P124632 | -1.5 | -1.8 | 1.0 | -5.5 | IGHA1 | Homo sapiens SNC73 protein (SNC73) mRNA, complete cds. [AF067420]                                                              | 3493 |
| A_24_P324838 | -1.0 | 1.5  | 2.2 | 1.6  | IGHD  | Homo sapiens cDNA FLJ46727 fis, clone TRACH3019058, highly similar to Ig delta chain C region. [AK128568]                      | 3495 |
| A_23_P167168 | 1.1  | -2.2 | 1.6 | -1.1 | IGJ   | Homo sapiens immunoglobulin J polypeptide, linker protein for immunoglobulin alpha and mu polypeptides (IGJ), mRNA [NM_144646] | 3512 |

|              |       |      |      |     |          |                                                                                                                     |           |
|--------------|-------|------|------|-----|----------|---------------------------------------------------------------------------------------------------------------------|-----------|
| A_24_P93523  | 1.2   | 1.5  | 2.2  | 1.1 | IGKV1D-8 | Homo sapiens clone S12G10K myosin-reactive immunoglobulin light chain variable region mRNA, partial cds. [AF035035] | 28904     |
| A_24_P104980 | -1.9  | -9.2 | -4.5 | 1.4 | IGLL5    | Homo sapiens germline mRNA for immunoglobulin lambda-2 chain constant region, Daudi cell line. [AJ319669]           | 100423062 |
| A_24_P271149 | -10.4 | 2.1  | 1.1  | 1.6 | IGLON5   | Homo sapiens IgLON family member 5 (IGLON5), mRNA [NM_001101372]                                                    | 402665    |

|              |      |      |      |      |        |                                                                                                     |        |
|--------------|------|------|------|------|--------|-----------------------------------------------------------------------------------------------------|--------|
| A_23_P125303 | -2.7 | 1.1  | 1.2  | 1.6  | IGSF1  | Homo sapiens immunoglobulin superfamily, member 1 (IGSF1), transcript variant 1, mRNA [NM_001555]   | 3547   |
| A_23_P398189 | -1.0 | -1.0 | -1.1 | -2.1 | IGSF11 | Homo sapiens immunoglobulin superfamily, member 11 (IGSF11), transcript variant 1, mRNA [NM_152538] | 152404 |
| A_32_P78101  | 2.6  | 1.1  | 1.1  | 1.3  | IGSF21 | Homo sapiens immunoglobulin superfamily, member 21 (IGSF21), mRNA [NM_032880]                       | 84966  |

|              |      |      |      |      |        |                                                                                                   |        |
|--------------|------|------|------|------|--------|---------------------------------------------------------------------------------------------------|--------|
| A_32_P486620 | -1.0 | -1.0 | -1.0 | -2.1 | IGSF22 | Homo sapiens immunoglobulin superfamily, member 22 (IGSF22), mRNA [NM_173588]                     | 283284 |
| A_24_P750817 | 1.1  | 1.0  | 1.0  | -5.1 | IGSF23 | Homo sapiens immunoglobulin superfamily, member 23 (IGSF23), mRNA [NM_001205280]                  | 147710 |
| A_23_P106629 | 1.2  | 1.1  | 2.7  | 2.3  | IGSF6  | Homo sapiens immunoglobulin superfamily, member 6 (IGSF6), mRNA [NM_005849]                       | 10261  |
| A_23_P137423 | 2.0  | 3.7  | 2.5  | 1.7  | IGSF8  | Homo sapiens immunoglobulin superfamily, member 8 (IGSF8), transcript variant 1, mRNA [NM_052868] | 93185  |

|              |       |     |      |      |       |                                                                                                                                         |       |
|--------------|-------|-----|------|------|-------|-----------------------------------------------------------------------------------------------------------------------------------------|-------|
| A_23_P85441  | 2.3   | 1.5 | 1.7  | -1.0 | IGSF9 | Homo sapiens immunoglobulin superfamily, member 9 (IGSF9), transcript variant 2, mRNA [NM_020789]                                       | 57549 |
| A_32_P173481 | -1.5  | 1.2 | -2.8 | -1.3 | IK    | Homo sapiens IK cytokine, down-regulator of HLA II (IK), mRNA [NM_006083]                                                               | 3550  |
| A_24_P132518 | -11.8 | 1.0 | 1.0  | 1.1  | IKBKB | Homo sapiens inhibitor of kappa light polypeptide gene enhancer in B-cells, kinase beta (IKBKB), transcript variant 1, mRNA [NM_001556] | 3551  |

|              |      |      |     |      |       |                                                                                                                                            |       |
|--------------|------|------|-----|------|-------|--------------------------------------------------------------------------------------------------------------------------------------------|-------|
| A_23_P887    | 1.0  | 1.0  | 1.0 | 3.0  | IKBKE | Homo sapiens inhibitor of kappa light polypeptide gene enhancer in B-cells, kinase epsilon (IKBKE), transcript variant 1, mRNA [NM_014002] | 9641  |
| A_23_P159920 | -1.0 | 1.4  | 2.1 | -1.9 | IKBKG | Homo sapiens inhibitor of kappa light polypeptide gene enhancer in B-cells, kinase gamma (IKBKG), transcript variant 3, mRNA [NM_003639]   | 8517  |
| A_24_P190631 | 1.1  | -2.1 | 1.7 | 4.1  | IKZF1 | Homo sapiens IKAROS family zinc finger 1 (Ikaros) (IKZF1), transcript variant 1, mRNA [NM_006060]                                          | 10320 |

|              |     |      |     |      |       |                                                                                                      |       |
|--------------|-----|------|-----|------|-------|------------------------------------------------------------------------------------------------------|-------|
| A_32_P114284 | 1.0 | 1.5  | 1.3 | -2.9 | IKZF2 | Homo sapiens IKAROS family zinc finger 2 (Helios) (IKZF2), transcript variant 2, mRNA [NM_001079526] | 22807 |
| A_32_P115475 | 2.7 | 2.5  | 3.1 | 3.2  | IKZF3 | IKAROS family zinc finger 3 (Aiolos) [Source:HGNC Symbol;Acc:13178] [ENST00000488188]                | 22806 |
| A_23_P358904 | 1.1 | -3.0 | 1.3 | -2.7 | IKZF4 | Homo sapiens IKAROS family zinc finger 4 (Eos) (IKZF4), mRNA [NM_022465]                             | 64375 |



|              |      |      |      |      |         |                                                                                                                                                  |      |
|--------------|------|------|------|------|---------|--------------------------------------------------------------------------------------------------------------------------------------------------|------|
| A_23_P91943  | -2.3 | 1.1  | -1.9 | -1.3 | IL12A   | Homo sapiens interleukin 12A (natural killer cell stimulatory factor 1, cytotoxic lymphocyte maturation factor 1, p35) (IL12A), mRNA [NM_000882] | 3592 |
| A_23_P7560   | 1.1  | -5.9 | 1.0  | -1.1 | IL12B   | Homo sapiens interleukin 12B (natural killer cell stimulatory factor 2, cytotoxic lymphocyte maturation factor 2, p40) (IL12B), mRNA [NM_002187] | 3593 |
| A_23_P101783 | -3.2 | 1.9  | 1.1  | -1.4 | IL12RB1 | Homo sapiens interleukin 12 receptor, beta 1 (IL12RB1), transcript variant 1, mRNA [NM_005535]                                                   | 3594 |

|              |      |       |      |      |         |                                                                                                |      |
|--------------|------|-------|------|------|---------|------------------------------------------------------------------------------------------------|------|
| A_23_P399156 | 2.2  | 1.1   | 2.0  | -1.5 | IL12RB1 | Homo sapiens interleukin 12 receptor, beta 1 (IL12RB1), transcript variant 2, mRNA [NM_153701] | 3594 |
| A_24_P280113 | 1.0  | -16.4 | 1.1  | 1.0  | IL13RA1 | Homo sapiens interleukin 13 receptor, alpha 1 (IL13RA1), mRNA [NM_001560]                      | 3597 |
| A_23_P85209  | 3.2  | -1.4  | -1.1 | -1.1 | IL13RA2 | Homo sapiens interleukin 13 receptor, alpha 2 (IL13RA2), mRNA [NM_000640]                      | 3598 |
| A_23_P138680 | -1.8 | 1.3   | 1.1  | -2.8 | IL15RA  | Homo sapiens interleukin 15 receptor, alpha (IL15RA), transcript variant 2, mRNA [NM_172200]   | 3601 |

|              |      |      |      |      |        |                                                                            |        |
|--------------|------|------|------|------|--------|----------------------------------------------------------------------------|--------|
| A_23_P61057  | -1.4 | -2.9 | -2.8 | -4.6 | IL16   | Homo sapiens interleukin 16 (IL16), transcript variant 1, mRNA [NM_004513] | 3603   |
| A_24_P73599  | 1.0  | 1.0  | -2.7 | -3.8 | IL16   | Homo sapiens interleukin 16 (IL16), transcript variant 2, mRNA [NM_172217] | 3603   |
| A_23_P49097  | 1.8  | 2.4  | 1.3  | 1.3  | IL17C  | Homo sapiens interleukin 17C (IL17C), mRNA [NM_013278]                     | 27189  |
| A_23_P167882 | -1.2 | -3.9 | -1.3 | -1.2 | IL17F  | Homo sapiens interleukin 17F (IL17F), mRNA [NM_052872]                     | 112744 |
| A_23_P17706  | -3.0 | 1.2  | 1.1  | 1.2  | IL17RA | Homo sapiens interleukin 17 receptor A (IL17RA), mRNA [NM_014339]          | 23765  |

|              |     |     |     |      |        |                                                                                              |        |
|--------------|-----|-----|-----|------|--------|----------------------------------------------------------------------------------------------|--------|
| A_23_P166775 | 2.6 | 3.0 | 1.8 | 2.0  | IL17RC | Homo sapiens interleukin 17 receptor C (IL17RC), transcript variant 2, mRNA [NM_153461]      | 84818  |
| A_23_P500206 | 1.1 | 6.5 | 1.8 | 1.0  | IL17RE | Homo sapiens interleukin 17 receptor E (IL17RE), transcript variant 5, mRNA [NM_153483]      | 132014 |
| A_24_P278602 | 1.7 | 1.1 | 1.7 | -2.4 | IL18BP | Homo sapiens interleukin 18 binding protein (IL18BP), transcript variant A, mRNA [NM_173042] | 10068  |
| A_23_P203629 | 1.5 | 2.2 | 2.7 | 2.0  | IL18BP | Homo sapiens interleukin 18 binding protein (IL18BP), transcript variant A, mRNA [NM_173042] | 10068  |

|              |      |      |      |      |        |                                                                                                       |       |
|--------------|------|------|------|------|--------|-------------------------------------------------------------------------------------------------------|-------|
| A_24_P208567 | 1.0  | -2.5 | 1.0  | -7.7 | IL18R1 | Homo sapiens interleukin 18 receptor 1 (IL18R1), mRNA [NM_003855]                                     | 8809  |
| A_23_P35092  | 1.8  | 2.4  | 1.6  | 1.7  | IL19   | Homo sapiens interleukin 19 (IL19), transcript variant 1, mRNA [NM_153758]                            | 29949 |
| A_23_P501713 | -2.0 | 1.0  | -1.4 | -2.2 | IL1F10 | Homo sapiens interleukin 1 family, member 10 (theta) (IL1F10), transcript variant 1, mRNA [NM_032556] | 84639 |
| A_24_P200023 | -1.7 | -2.2 | -3.9 | -1.9 | IL1R1  | Homo sapiens interleukin 1 receptor, type I (IL1R1), mRNA [NM_000877]                                 | 3554  |

|              |      |      |      |      |        |                                                                                                        |      |
|--------------|------|------|------|------|--------|--------------------------------------------------------------------------------------------------------|------|
| A_23_P79398  | 2.5  | -1.2 | 1.1  | 2.8  | IL1R2  | Homo sapiens interleukin 1 receptor, type II (IL1R2), transcript variant 1, mRNA [NM_004633]           | 7850 |
| A_23_P336554 | -1.0 | -1.0 | -3.0 | -1.0 | IL1RAP | Homo sapiens interleukin 1 receptor accessory protein (IL1RAP), transcript variant 2, mRNA [NM_134470] | 3556 |
| A_23_P170857 | -1.2 | -1.0 | -1.0 | -2.3 | IL1RAP | Homo sapiens interleukin 1 receptor accessory protein (IL1RAP), transcript variant 1, mRNA [NM_002182] | 3556 |
| A_23_P56604  | 2.8  | 1.9  | 1.7  | 1.1  | IL1RL2 | Homo sapiens interleukin 1 receptor-like 2 (IL1RL2), mRNA [NM_003854]                                  | 8808 |

|              |      |      |      |      |         |                                                                                                              |       |
|--------------|------|------|------|------|---------|--------------------------------------------------------------------------------------------------------------|-------|
| A_32_P38125  | -1.0 | -4.5 | -1.1 | -1.1 | IL1RN   | interleukin<br>1 receptor<br>antagonist<br>[Source:H<br>GNC<br>Symbol;Ac<br>c:6000]<br>[ENST0000<br>0465812] | 3557  |
| A_23_P167250 | 1.1  | 2.7  | 1.7  | 3.4  | IL21    | Homo<br>sapiens<br>interleukin<br>21 (IL21),<br>transcript<br>variant 1,<br>mRNA<br>[NM_0218<br>03]          | 59067 |
| A_24_P413479 | -1.2 | -1.2 | -2.3 | -1.3 | IL22RA1 | Homo<br>sapiens<br>interleukin<br>22<br>receptor,<br>alpha 1<br>(IL22RA1),<br>mRNA<br>[NM_0212<br>58]        | 58985 |
| A_23_P51951  | -1.1 | 2.9  | -1.1 | 1.1  | IL24    | Homo<br>sapiens<br>interleukin<br>24 (IL24),<br>transcript<br>variant 1,<br>mRNA<br>[NM_0068<br>50]          | 11009 |

|              |      |      |      |      |        |                                                                               |        |
|--------------|------|------|------|------|--------|-------------------------------------------------------------------------------|--------|
| A_24_P348326 | 2.0  | 4.9  | 3.9  | 3.1  | IL27RA | Homo sapiens interleukin 27 receptor, alpha (IL27RA), mRNA [NM_004843]        | 9466   |
| A_23_P27606  | -2.0 | -1.8 | -2.4 | -2.0 | IL27RA | Homo sapiens interleukin 27 receptor, alpha (IL27RA), mRNA [NM_004843]        | 9466   |
| A_23_P409438 | 1.3  | 2.2  | 1.2  | -1.2 | IL28A  | Homo sapiens interleukin 28A (interferon, lambda 2) (IL28A), mRNA [NM_172138] | 282616 |
| A_23_P337800 | -5.8 | -1.4 | -1.3 | -1.3 | IL29   | Homo sapiens interleukin 29 (interferon, lambda 1) (IL29), mRNA [NM_172140]   | 282618 |



|              |     |      |      |       |        |                                                                                         |        |
|--------------|-----|------|------|-------|--------|-----------------------------------------------------------------------------------------|--------|
| A_23_P127288 | 1.0 | 1.0  | -2.2 | 1.1   | IL2RA  | Homo sapiens interleukin 2 receptor, alpha (IL2RA), mRNA [NM_000417]                    | 3559   |
| A_23_P148473 | 2.3 | 1.2  | 1.9  | -10.5 | IL2RG  | Homo sapiens interleukin 2 receptor, gamma (IL2RG), mRNA [NM_000206]                    | 3561   |
| A_24_P937317 | 4.5 | 3.3  | 1.6  | 1.5   | IL31   | Homo sapiens interleukin 31 (IL31), mRNA [NM_001014336]                                 | 386653 |
| A_24_P377283 | 1.4 | -6.7 | 1.6  | -1.0  | IL31RA | Homo sapiens interleukin 31 receptor A (IL31RA), transcript variant 1, mRNA [NM_139017] | 133396 |

|              |      |       |      |      |        |                                                                                                  |        |
|--------------|------|-------|------|------|--------|--------------------------------------------------------------------------------------------------|--------|
| A_23_P100386 | -1.6 | -13.6 | -1.6 | -1.6 | IL34   | Homo sapiens interleukin 34 (IL34), transcript variant 1, mRNA [NM_152456]                       | 146433 |
| A_23_P348028 | -1.5 | -2.5  | -2.3 | -2.3 | IL36A  | Homo sapiens interleukin 36, alpha (IL36A), mRNA [NM_014440]                                     | 27179  |
| A_23_P90925  | 1.1  | -5.0  | -1.1 | 1.0  | IL36B  | Homo sapiens interleukin 36, beta (IL36B), transcript variant 2, mRNA [NM_173178]                | 27177  |
| A_24_P68783  | -2.8 | -1.7  | -1.0 | -1.0 | IL36RN | Homo sapiens interleukin 36 receptor antagonist (IL36RN), transcript variant 1, mRNA [NM_012275] | 26525  |

|              |      |      |      |      |       |                                                                                                                             |      |
|--------------|------|------|------|------|-------|-----------------------------------------------------------------------------------------------------------------------------|------|
| A_23_P500676 | -1.3 | -2.4 | -1.2 | -1.2 | IL5RA | Homo sapiens interleukin 5 receptor, alpha (IL5RA), transcript variant 3, mRNA [NM_175725]                                  | 3568 |
| A_24_P379413 | 1.2  | 1.1  | 1.1  | -3.9 | IL6R  | Homo sapiens interleukin 6 receptor (IL6R), transcript variant 1, mRNA [NM_000565]                                          | 3570 |
| A_32_P45168  | 3.0  | 4.4  | 2.0  | 2.8  | IL6ST | Homo sapiens interleukin 6 signal transducer (gp130, oncostatin M receptor) (IL6ST), transcript variant 1, mRNA [NM_002184] | 3572 |
| A_23_P8961   | 1.0  | -2.6 | -1.0 | -1.0 | IL7   | Homo sapiens interleukin 7 (IL7), transcript variant 1, mRNA [NM_000880]                                                    | 3574 |

|              |      |     |      |      |      |                                                                                                          |      |
|--------------|------|-----|------|------|------|----------------------------------------------------------------------------------------------------------|------|
| A_32_P87013  | -1.8 | 1.1 | -2.1 | -1.7 | IL8  | Homo sapiens interleukin 8 (IL8), mRNA [NM_000584]                                                       | 3576 |
| A_23_P34066  | 2.2  | 2.0 | 3.1  | 2.0  | IL9R | Homo sapiens interleukin 9 receptor (IL9R), transcript variant 1, mRNA [NM_002186]                       | 3581 |
| A_23_P218456 | 1.2  | 1.2 | 1.1  | -2.0 | ILF3 | Homo sapiens interleukin enhancer binding factor 3, 90kDa (ILF3), transcript variant 1, mRNA [NM_012218] | 3609 |
| A_24_P406870 | 1.6  | 2.0 | 1.1  | 2.1  | ILK  | Homo sapiens integrin-linked kinase (ILK), transcript variant 3, mRNA [NM_001014795]                     | 3611 |

|              |     |      |      |      |        |                                                                                                                                                                             |       |
|--------------|-----|------|------|------|--------|-----------------------------------------------------------------------------------------------------------------------------------------------------------------------------|-------|
| A_23_P165148 | 2.0 | 1.9  | 1.4  | 3.8  | ILVBL  | Homo sapiens ilvB (bacterial acetolactate synthase)-like (ILVBL), mRNA [NM_006844]                                                                                          | 10994 |
| A_32_P87872  | 1.1 | -5.2 | -1.3 | -1.2 | IMMP2L | Homo sapiens IMP2 inner mitochondrial membrane peptidase-like (S. cerevisiae) (IMMP2L), nuclear gene encoding mitochondrial protein, transcript variant 1, mRNA [NM_032549] | 83943 |

|              |      |      |      |      |        |                                                                                                                                                                             |        |
|--------------|------|------|------|------|--------|-----------------------------------------------------------------------------------------------------------------------------------------------------------------------------|--------|
| A_24_P151622 | -1.8 | -1.0 | -2.3 | -1.1 | IMMP2L | Homo sapiens IMP2 inner mitochondrial membrane peptidase-like (S. cerevisiae) (IMMP2L), nuclear gene encoding mitochondrial protein, transcript variant 1, mRNA [NM_032549] | 83943  |
| A_23_P131518 | 4.0  | 3.8  | 1.0  | 1.0  | IMP4   | IMP4, U3 small nucleolar ribonucleo protein, homolog (yeast) [Source:HGNC Symbol;Acc:30856] [ENST00000462392]                                                               | 92856  |
| A_32_P142779 | -1.2 | 1.3  | -3.8 | -1.4 | IMP5   | Homo sapiens intramembrane protease 5 (IMP5), mRNA [NM_175882]                                                                                                              | 162540 |

|              |      |       |      |      |        |                                                                                                              |      |
|--------------|------|-------|------|------|--------|--------------------------------------------------------------------------------------------------------------|------|
| A_23_P168818 | -2.1 | 1.1   | -1.0 | -1.0 | IMPA1  | Homo sapiens inositol(myo)-1(or 4)-monophosphatase 1 (IMPA1), transcript variant 1, mRNA [NM_005536]         | 3612 |
| A_24_P89701  | -3.2 | -1.8  | -3.4 | -3.6 | IMPDH1 | Homo sapiens IMP (inosine 5'-monophosphate) dehydrogenase 1 (IMPDH1), transcript variant 1, mRNA [NM_000883] | 3614 |
| A_23_P42032  | -3.0 | -46.0 | -1.0 | -3.8 | IMPG1  | Homo sapiens interphoto receptor matrix proteoglycan 1 (IMPG1), mRNA [NM_001563]                             | 3617 |

|              |      |      |      |      |       |                                                                                               |       |
|--------------|------|------|------|------|-------|-----------------------------------------------------------------------------------------------|-------|
| A_23_P35444  | -4.0 | 2.1  | 1.9  | -3.4 | INA   | Homo sapiens internexin neuronal intermediate filament protein, alpha (INA), mRNA [NM_032727] | 9118  |
| A_23_P321034 | 1.2  | -1.7 | -3.4 | -2.7 | INADL | Homo sapiens InaD-like (Drosophila) (INADL), mRNA [NM_176877]                                 | 10207 |
| A_23_P126100 | -1.3 | -3.2 | -1.2 | -2.3 | INADL | Homo sapiens InaD-like (Drosophila) (INADL), mRNA [NM_176877]                                 | 10207 |
| A_24_P942454 | -1.0 | -5.4 | -1.1 | -1.2 | INADL | Homo sapiens InaD-like (Drosophila) (INADL), mRNA [NM_176877]                                 | 10207 |



|              |     |     |      |      |        |                                                                                                                |       |
|--------------|-----|-----|------|------|--------|----------------------------------------------------------------------------------------------------------------|-------|
| A_24_P274072 | 2.7 | 2.4 | 2.3  | 1.7  | INADL  | Homo sapiens InaD-like (Drosophila) (INADL), mRNA [NM_176877]                                                  | 10207 |
| A_23_P116387 | 1.0 | 1.0 | -2.3 | -1.0 | INCENP | Homo sapiens inner centromere protein antigens 135/155k Da (INCENP), transcript variant 1, mRNA [NM_001040694] | 3619  |
| A_23_P218131 | 2.4 | 2.1 | 2.1  | 2.2  | INF2   | Homo sapiens inverted formin, FH2 and WH2 domain containing (INF2), transcript variant 3, mRNA [NM_032714]     | 64423 |

|             |      |      |      |      |      |                                                                                                            |       |
|-------------|------|------|------|------|------|------------------------------------------------------------------------------------------------------------|-------|
| A_24_P13649 | 1.7  | 3.1  | -1.3 | 1.0  | INF2 | Homo sapiens inverted formin, FH2 and WH2 domain containing (INF2), transcript variant 3, mRNA [NM_032714] | 64423 |
| A_23_P99437 | -2.4 | 1.2  | 1.4  | -2.2 | ING1 | Homo sapiens inhibitor of growth family, member 1 (ING1), transcript variant 1, mRNA [NM_198219]           | 3621  |
| A_23_P48070 | -1.5 | -3.4 | -1.9 | 1.4  | ING4 | Homo sapiens inhibitor of growth family, member 4 (ING4), transcript variant 1, mRNA [NM_016162]           | 51147 |
| A_24_P34545 | 1.3  | -1.3 | -2.2 | -1.0 | ING5 | Homo sapiens inhibitor of growth family, member 5 (ING5), mRNA [NM_032329]                                 | 84289 |

|              |      |      |      |      |       |                                                                            |       |
|--------------|------|------|------|------|-------|----------------------------------------------------------------------------|-------|
| A_23_P124202 | 1.2  | -1.0 | -4.4 | -1.0 | ING5  | Homo sapiens inhibitor of growth family, member 5 (ING5), mRNA [NM_032329] | 84289 |
| A_23_P51039  | 2.1  | 1.7  | 2.1  | -1.1 | INHA  | Homo sapiens inhibin, alpha (INHA), mRNA [NM_002191]                       | 3623  |
| A_23_P153964 | -2.5 | -1.1 | -1.4 | -1.1 | INHBB | Homo sapiens inhibin, beta B (INHBB), mRNA [NM_002193]                     | 3625  |
| A_24_P155502 | -4.3 | 1.3  | -2.0 | -3.7 | INHBC | Homo sapiens inhibin, beta C (INHBC), mRNA [NM_005538]                     | 3626  |
| A_23_P76051  | 1.3  | 1.0  | -1.9 | -4.1 | INHBC | Homo sapiens inhibin, beta C (INHBC), mRNA [NM_005538]                     | 3626  |

|              |      |     |      |      |        |                                                                                                   |        |
|--------------|------|-----|------|------|--------|---------------------------------------------------------------------------------------------------|--------|
| A_24_P117954 | 1.5  | 1.2 | 1.3  | 3.4  | INO80C | Homo sapiens INO80 complex subunit C (INO80C), transcript variant 2, mRNA [NM_194281]             | 125476 |
| A_23_P209652 | -1.1 | 1.1 | -1.0 | -3.5 | INO80D | Homo sapiens INO80 complex subunit D (INO80D), mRNA [NM_017759]                                   | 54891  |
| A_23_P142756 | 2.9  | 2.2 | 2.2  | 2.2  | INO80D | Homo sapiens INO80 complex subunit D (INO80D), mRNA [NM_017759]                                   | 54891  |
| A_32_P44453  | 2.5  | 2.5 | 2.6  | 2.5  | INPP1  | Homo sapiens inositol polyphosphate-1-phosphatase (INPP1), transcript variant 2, mRNA [NM_002194] | 3628   |

|              |      |      |      |      |        |                                                                                                             |       |
|--------------|------|------|------|------|--------|-------------------------------------------------------------------------------------------------------------|-------|
| A_24_P915492 | -1.0 | -1.0 | -3.2 | -1.0 | INPP4B | inositol polyphosphate-4-phosphatase, type II, 105kDa<br>[Source:HGNC Symbol;Acc:6075]<br>[ENST00000507861] | 8821  |
| A_23_P202307 | 3.6  | 3.5  | 3.5  | 3.8  | INPP5A | Homo sapiens inositol polyphosphate-5-phosphatase, 40kDa (INPP5A), mRNA<br>[NM_005539]                      | 3632  |
| A_23_P94875  | 1.2  | -2.0 | 1.0  | 1.1  | INPP5E | Homo sapiens inositol polyphosphate-5-phosphatase, 72 kDa (INPP5E), mRNA<br>[NM_019892]                     | 56623 |

|              |      |     |      |      |        |                                                                                                      |       |
|--------------|------|-----|------|------|--------|------------------------------------------------------------------------------------------------------|-------|
| A_24_P4426   | -1.5 | 1.0 | -1.7 | -2.1 | INPP5F | Homo sapiens inositol polyphosphate-5-phosphatase F (INPP5F), transcript variant 1, mRNA [NM_014937] | 22876 |
| A_24_P279328 | -2.7 | 1.1 | -2.5 | -1.0 | INPP5K | Homo sapiens inositol polyphosphate-5-phosphatase K (INPP5K), transcript variant 2, mRNA [NM_130766] | 51763 |
| A_23_P55076  | 1.6  | 1.7 | 2.1  | 1.0  | INPP5K | Homo sapiens inositol polyphosphate-5-phosphatase K (INPP5K), transcript variant 2, mRNA [NM_130766] | 51763 |

|              |      |      |      |      |        |                                                                                   |       |
|--------------|------|------|------|------|--------|-----------------------------------------------------------------------------------|-------|
| A_23_P36322  | 1.4  | -1.0 | 2.1  | 1.0  | INPPL1 | Homo sapiens inositol polyphosphate phosphatase-like 1 (INPPL1), mRNA [NM_001567] | 3636  |
| A_23_P102454 | 1.6  | -1.5 | -2.7 | 2.3  | INSIG2 | Homo sapiens insulin induced gene 2 (INSIG2), mRNA [NM_016133]                    | 51141 |
| A_23_P209006 | 2.4  | 1.2  | 1.1  | 1.5  | INSL3  | Homo sapiens insulin-like 3 (Leydig cell) (INSL3), mRNA [NM_005543]               | 3640  |
| A_23_P309281 | -5.8 | -2.3 | -1.9 | -1.3 | INSL3  | Homo sapiens insulin-like 3 (Leydig cell) (INSL3), mRNA [NM_005543]               | 3640  |

|              |      |      |      |      |        |                                                                        |       |
|--------------|------|------|------|------|--------|------------------------------------------------------------------------|-------|
| A_24_P31676  | -2.4 | -1.8 | -1.0 | -6.6 | INSM1  | Homo sapiens insulinoma-associated 1 (INSM1), mRNA [NM_002196]         | 3642  |
| A_24_P66672  | 4.2  | 2.8  | 3.3  | 2.3  | INTS1  | Homo sapiens integrator complex subunit 1 (INTS1), mRNA [NM_001080453] | 26173 |
| A_23_P157607 | -1.1 | -1.0 | -1.0 | 2.4  | INTS10 | Homo sapiens integrator complex subunit 10 (INTS10), mRNA [NM_018142]  | 55174 |
| A_23_P203737 | -2.0 | -2.5 | -1.4 | -2.6 | INTS4  | Homo sapiens integrator complex subunit 4 (INTS4), mRNA [NM_033547]    | 92105 |



|              |       |      |      |      |         |                                                                                           |        |
|--------------|-------|------|------|------|---------|-------------------------------------------------------------------------------------------|--------|
| A_32_P345444 | 1.3   | 1.3  | -5.3 | 1.0  | INTS4L1 | Homo sapiens integrator complex subunit 4-like 1 (INTS4L1), non-coding RNA [NR_027393]    | 285905 |
| A_23_P13338  | 1.0   | -1.1 | -4.0 | -1.1 | INTS5   | Homo sapiens integrator complex subunit 5 (INTS5), mRNA [NM_030628]                       | 80789  |
| A_24_P913760 | -14.8 | 1.0  | -1.1 | -1.0 | INTS6   | Homo sapiens integrator complex subunit 6 (INTS6), transcript variant 1, mRNA [NM_012141] | 26512  |
| A_24_P167614 | 2.5   | 1.3  | -1.7 | -2.2 | INTS6   | Homo sapiens integrator complex subunit 6 (INTS6), transcript variant 1, mRNA [NM_012141] | 26512  |

|              |      |      |      |      |        |                                                                                                                    |        |
|--------------|------|------|------|------|--------|--------------------------------------------------------------------------------------------------------------------|--------|
| A_23_P43079  | 1.1  | -8.6 | 1.4  | 1.7  | INTS8  | Homo sapiens integrator complex subunit 8 (INTS8), mRNA [NM_017864]                                                | 55656  |
| A_24_P396105 | -2.6 | 1.6  | -1.4 | -3.9 | IP6K1  | Homo sapiens inositol hexakisphosphate kinase 1 (IP6K1), transcript variant 1, mRNA [NM_153273]                    | 9807   |
| A_23_P168130 | -4.1 | 5.9  | 10.3 | 3.1  | IP6K3  | Homo sapiens inositol hexakisphosphate kinase 3 (IP6K3), transcript variant 1, mRNA [NM_054111]                    | 117283 |
| A_24_P940059 | 1.1  | -2.4 | -2.2 | 1.0  | IPCEF1 | Homo sapiens interaction protein for cytohesin exchange factors 1 (IPCEF1), transcript variant 3, mRNA [NM_015553] | 26034  |

|              |      |      |      |      |       |                                                                                                |        |
|--------------|------|------|------|------|-------|------------------------------------------------------------------------------------------------|--------|
| A_23_P380371 | -1.1 | -1.1 | -8.6 | -4.3 | IPMK  | Homo sapiens inositol polyphosphate multikinase (IPMK), mRNA [NM_152230]                       | 253430 |
| A_23_P115036 | 2.1  | -1.0 | -1.1 | 1.2  | IPO13 | Homo sapiens importin 13 (IPO13), mRNA [NM_014652]                                             | 9670   |
| A_23_P205007 | 5.4  | 5.4  | 5.1  | 3.2  | IPO5  | Homo sapiens importin 5 (IPO5), mRNA [NM_002271]                                               | 3843   |
| A_23_P97157  | 1.4  | -2.3 | -1.5 | 1.4  | IPO9  | Homo sapiens importin 9 (IPO9), mRNA [NM_018085]                                               | 55705  |
| A_24_P855152 | -2.5 | 1.0  | -1.0 | -1.0 | IPP   | intracisternal A particle-promoted polypeptide [Source:HGNC Symbol;Acc:6108] [ENST00000495072] | 3652   |

|              |     |      |      |       |       |                                                                                                        |       |
|--------------|-----|------|------|-------|-------|--------------------------------------------------------------------------------------------------------|-------|
| A_24_P607880 | 1.0 | -1.0 | -1.0 | -3.4  | IPW   | Homo sapiens imprinted in Prader-Willi syndrome (non-protein coding) (IPW), non-coding RNA [NR_023915] | 3653  |
| A_23_P143068 | 1.1 | 1.0  | -3.9 | 1.0   | IQCA1 | Homo sapiens IQ motif containing with AAA domain 1 (IQCA1), mRNA [NM_024726]                           | 79781 |
| A_23_P73192  | 1.1 | 1.0  | -6.0 | 1.1   | IQCA1 | Homo sapiens IQ motif containing with AAA domain 1 (IQCA1), mRNA [NM_024726]                           | 79781 |
| A_24_P266285 | 1.1 | 1.1  | -1.0 | -14.9 | IQCE  | Homo sapiens IQ motif containing E (IQCE), transcript variant 1, mRNA [NM_152558]                      | 23288 |

|              |       |      |      |      |       |                                                                                                          |           |
|--------------|-------|------|------|------|-------|----------------------------------------------------------------------------------------------------------|-----------|
| A_23_P19852  | -1.0  | -1.1 | -2.8 | -1.1 | IQCE  | Homo sapiens IQ motif containing E (IQCE), transcript variant 1, mRNA [NM_152558]                        | 23288     |
| A_24_P145242 | 1.0   | -2.5 | -1.0 | -1.1 | IQCF1 | Homo sapiens IQ motif containing F1, mRNA (cDNA clone IMAGE:5266078), complete cds. [BC034228]           | 132141    |
| A_32_P121834 | -38.8 | 1.4  | 1.5  | 1.0  | IQCF1 | Homo sapiens IQ motif containing F1 (IQCF1), mRNA [NM_152397]                                            | 132141    |
| A_32_P138652 | -2.7  | -1.1 | 1.4  | -1.0 | IQCF4 | Homo sapiens IQ motif containing F5 pseudogene (IQCF4), transcript variant 1, non-coding RNA [NR_038213] | 100506840 |

|              |      |      |      |      |        |                                                                                         |        |
|--------------|------|------|------|------|--------|-----------------------------------------------------------------------------------------|--------|
| A_32_P13756  | -1.1 | -6.6 | 1.9  | 1.1  | IQCF6  | Homo sapiens IQ motif containing F6 (IQCF6), mRNA [NM_001143833]                        | 440956 |
| A_23_P300076 | -1.0 | -1.1 | -1.2 | -5.7 | IQCG   | Homo sapiens IQ motif containing G (IQCG), transcript variant 1, mRNA [NM_032263]       | 84223  |
| A_24_P275585 | 3.8  | 3.1  | -2.0 | 2.2  | IQCH   | Homo sapiens IQ motif containing H (IQCH), transcript variant 1, mRNA [NM_001031715]    | 64799  |
| A_24_P321919 | -1.7 | -2.2 | 1.1  | 1.7  | IQGAP1 | Homo sapiens IQ motif containing GTPase activating protein 1 (IQGAP1), mRNA [NM_003870] | 8826   |

|              |      |      |      |      |        |                                                                                          |        |
|--------------|------|------|------|------|--------|------------------------------------------------------------------------------------------|--------|
| A_23_P329335 | -2.6 | 1.3  | -1.2 | 1.3  | IQGAP3 | Homo sapiens IQ motif containing GTPase activating protein 3 (IQGAP3), mRNA [NM_178229]  | 128239 |
| A_23_P330788 | -2.0 | -1.2 | 1.8  | 1.3  | IQSEC2 | Homo sapiens IQ motif and Sec7 domain 2 (IQSEC2), transcript variant 2, mRNA [NM_015075] | 23096  |
| A_32_P195515 | -1.7 | -3.2 | 1.1  | -1.8 | IQSEC3 | Homo sapiens IQ motif and Sec7 domain 3 (IQSEC3), transcript variant 2, mRNA [NM_015232] | 440073 |
| A_24_P203298 | -9.6 | -1.2 | -1.1 | -1.6 | IQUB   | Homo sapiens IQ motif and ubiquitin domain containing (IQUB), mRNA [NM_178827]           | 154865 |

|             |      |      |      |      |          |                                                                                                           |        |
|-------------|------|------|------|------|----------|-----------------------------------------------------------------------------------------------------------|--------|
| A_23_P73780 | 1.2  | -1.6 | -2.0 | 1.2  | IRAK1    | Homo sapiens interleukin-1 receptor-associated kinase 1 (IRAK1), transcript variant 1, mRNA [NM_001569]   | 3654   |
| A_32_P21474 | 1.0  | -1.0 | -4.2 | -1.0 | IRAK1BP1 | Homo sapiens interleukin-1 receptor-associated kinase 1 binding protein 1 (IRAK1BP1), mRNA [NM_001010844] | 134728 |
| A_23_P80635 | -1.6 | 1.4  | 2.4  | -2.2 | IRAK2    | Homo sapiens interleukin-1 receptor-associated kinase 2 (IRAK2), mRNA [NM_001570]                         | 3656   |



|              |      |      |      |      |       |                                                                                                         |       |
|--------------|------|------|------|------|-------|---------------------------------------------------------------------------------------------------------|-------|
| A_23_P162300 | 2.5  | 2.5  | 2.4  | 2.6  | IRAK3 | Homo sapiens interleukin-1 receptor-associated kinase 3 (IRAK3), transcript variant 1, mRNA [NM_007199] | 11213 |
| A_32_P83256  | 1.0  | 1.5  | -6.8 | 1.0  | IRAK3 | Homo sapiens interleukin-1 receptor-associated kinase 3 (IRAK3), transcript variant 1, mRNA [NM_007199] | 11213 |
| A_23_P106497 | 1.8  | 2.0  | 1.3  | 2.2  | IREB2 | Homo sapiens iron-responsive element binding protein 2 (IREB2), mRNA [NM_004136]                        | 3658  |
| A_23_P41765  | -1.9 | -1.9 | -2.2 | -2.1 | IRF1  | Homo sapiens interferon regulatory factor 1 (IRF1), mRNA [NM_002198]                                    | 3659  |

|              |      |      |      |      |         |                                                                                                                 |        |
|--------------|------|------|------|------|---------|-----------------------------------------------------------------------------------------------------------------|--------|
| A_23_P46588  | 1.1  | 3.4  | 1.1  | 1.1  | IRF2BP2 | Homo sapiens interferon regulatory factor 2 binding protein 2 (IRF2BP2), transcript variant 1, mRNA [NM_182972] | 359948 |
| A_24_P154214 | 9.5  | 9.0  | 8.4  | 6.3  | IRF2BP2 | Homo sapiens interferon regulatory factor 2 binding protein 2 (IRF2BP2), transcript variant 1, mRNA [NM_182972] | 359948 |
| A_32_P466514 | -2.1 | -1.7 | -1.4 | -2.1 | IRF2BPL | Homo sapiens interferon regulatory factor 2 binding protein-like (IRF2BPL), mRNA [NM_024496]                    | 64207  |

|              |      |     |      |      |      |                                                                                               |       |
|--------------|------|-----|------|------|------|-----------------------------------------------------------------------------------------------|-------|
| A_23_P156505 | -1.6 | 1.2 | -3.2 | 1.5  | IRF4 | Homo sapiens interferon regulatory factor 4 (IRF4), transcript variant 1, mRNA [NM_002460]    | 3662  |
| A_23_P500271 | 3.1  | 2.3 | 1.3  | 2.4  | IRF5 | Homo sapiens interferon regulatory factor 5 (IRF5), transcript variant 3, mRNA [NM_001098627] | 3663  |
| A_24_P118892 | -1.2 | 1.3 | -3.4 | -1.2 | IRF7 | Homo sapiens interferon regulatory factor 7 (IRF7), transcript variant b, mRNA [NM_004029]    | 3665  |
| A_23_P65442  | 1.3  | 1.6 | 2.1  | -1.5 | IRF9 | Homo sapiens interferon regulatory factor 9 (IRF9), mRNA [NM_006084]                          | 10379 |

|              |      |      |      |      |      |                                                                              |       |
|--------------|------|------|------|------|------|------------------------------------------------------------------------------|-------|
| A_23_P67521  | -1.0 | -1.3 | -3.4 | 1.6  | IRGC | Homo sapiens immunity-related GTPase family, cinema (IRGC), mRNA [NM_019612] | 56269 |
| A_24_P225679 | 1.0  | -2.4 | -1.1 | -1.1 | IRS1 | Homo sapiens insulin receptor substrate 1 (IRS1), mRNA [NM_005544]           | 3667  |
| A_23_P133457 | 2.9  | 1.6  | 1.0  | 2.6  | IRX1 | Homo sapiens iroquois homeobox 1 (IRX1), mRNA [NM_024337]                    | 79192 |
| A_23_P152235 | 1.1  | -1.0 | -1.1 | -2.7 | IRX3 | Homo sapiens iroquois homeobox 3 (IRX3), mRNA [NM_024336]                    | 79191 |
| A_24_P207195 | 2.8  | 2.3  | 2.4  | 1.2  | IRX3 | Homo sapiens iroquois homeobox 3 (IRX3), mRNA [NM_024336]                    | 79191 |

|              |      |      |      |      |      |                                                                                                                                                         |       |
|--------------|------|------|------|------|------|---------------------------------------------------------------------------------------------------------------------------------------------------------|-------|
| A_24_P20795  | -2.9 | 3.9  | 5.1  | 2.6  | IRX4 | Homo sapiens iroquois homeobox 4 (IRX4), mRNA [NM_016358]                                                                                               | 50805 |
| A_23_P9779   | -1.1 | -1.4 | -4.9 | -2.7 | IRX5 | Homo sapiens iroquois homeobox 5 (IRX5), transcript variant 1, mRNA [NM_005853]                                                                         | 10265 |
| A_23_P73348  | 2.7  | -1.7 | 2.0  | 1.5  | IRX6 | Homo sapiens iroquois homeobox 6 (IRX6), mRNA [NM_024335]                                                                                               | 79190 |
| A_23_P340158 | -1.1 | -4.4 | -1.2 | -1.0 | ISCU | Homo sapiens iron-sulfur cluster scaffold homolog (E. coli) (ISCU), nuclear gene encoding mitochondrial protein, transcript variant 1, mRNA [NM_014301] | 23479 |

|              |      |      |      |      |         |                                                                                                                       |       |
|--------------|------|------|------|------|---------|-----------------------------------------------------------------------------------------------------------------------|-------|
| A_23_P819    | 2.4  | -1.0 | 3.0  | 2.1  | ISG15   | Homo sapiens ISG15 ubiquitin-like modifier (ISG15), mRNA [NM_005101]                                                  | 9636  |
| A_23_P126457 | -3.5 | -1.0 | -1.1 | -1.0 | ISG20L2 | Homo sapiens interferon stimulated exonuclease gene 20kDa-like 2 (ISG20L2), mRNA [NM_030980]                          | 81875 |
| A_23_P81529  | 5.9  | 5.5  | 1.7  | 2.7  | ISL1    | Homo sapiens ISL LIM homeobox 1 (ISL1), mRNA [NM_002202]                                                              | 3670  |
| A_23_P3312   | -1.2 | 2.2  | 1.0  | 1.7  | ISLR    | Homo sapiens immunoglobulin superfamily containing leucine-rich repeat (ISLR), transcript variant 1, mRNA [NM_005545] | 3671  |

|              |      |      |     |      |       |                                                                                                                                               |        |
|--------------|------|------|-----|------|-------|-----------------------------------------------------------------------------------------------------------------------------------------------|--------|
| A_32_P379467 | -1.0 | -1.1 | 2.6 | -1.0 | ISLR2 | Homo sapiens immunoglobulin superfamily containing leucine-rich repeat 2 (ISLR2), transcript variant 2, mRNA [NM_020851]                      | 57611  |
| A_32_P186731 | 2.8  | 2.7  | 2.9 | 2.4  | ISM1  | Homo sapiens isthmin 1 homolog (zebrafish) (ISM1), mRNA [NM_080826]                                                                           | 140862 |
| A_24_P99795  | 5.4  | 4.0  | 3.3 | 2.0  | ISOC2 | Homo sapiens isochorismatase domain containing 2 (ISOC2), nuclear gene encoding mitochondrial protein, transcript variant 2, mRNA [NM_024710] | 79763  |

|              |      |      |      |      |      |                                                                                                             |       |
|--------------|------|------|------|------|------|-------------------------------------------------------------------------------------------------------------|-------|
| A_24_P339157 | -1.8 | -1.8 | -3.2 | -1.9 | IST1 | Homo sapiens increased sodium tolerance 1 homolog (yeast) (IST1), mRNA [NM_014761]                          | 9798  |
| A_32_P217140 | 1.0  | -1.0 | -5.3 | -1.1 | ISX  | Homo sapiens intestine-specific homeobox (ISX), mRNA [NM_001008494]                                         | 91464 |
| A_23_P155179 | -1.0 | -2.2 | 1.0  | -1.2 | ISY1 | Homo sapiens ISY1 splicing factor homolog (S. cerevisiae) (ISY1), transcript variant 1, mRNA [NM_001199469] | 57461 |



|              |      |      |      |      |        |                                                                                                          |       |
|--------------|------|------|------|------|--------|----------------------------------------------------------------------------------------------------------|-------|
| A_23_P124164 | -1.7 | -1.7 | -2.2 | -1.8 | ISY1   | Homo sapiens ISY1 splicing factor homolog (S. cerevisiae) (ISY1), transcript variant 2, mRNA [NM_020701] | 57461 |
| A_23_P5131   | -1.7 | -1.2 | -2.4 | -3.5 | ISYNA1 | Homo sapiens inositol-3-phosphate synthase 1 (ISYNA1), transcript variant 1, mRNA [NM_016368]            | 51477 |
| A_24_P139191 | 1.6  | 1.5  | -2.6 | -1.1 | ITCH   | Homo sapiens itchy E3 ubiquitin protein ligase homolog (mouse) (ITCH), mRNA [NM_031483]                  | 83737 |
| A_23_P206022 | -1.8 | 3.2  | 3.5  | 1.0  | ITGA11 | Homo sapiens integrin, alpha 11 (ITGA11), mRNA [NM_001004439]                                            | 22801 |

|              |      |       |      |      |        |                                                                                                                          |      |
|--------------|------|-------|------|------|--------|--------------------------------------------------------------------------------------------------------------------------|------|
| A_32_P208076 | -3.1 | 1.7   | 1.1  | 1.1  | ITGA2  | Homo sapiens integrin, alpha 2 (CD49B, alpha 2 subunit of VLA-2 receptor) (ITGA2), mRNA [NM_002203]                      | 3673 |
| A_23_P77971  | -1.1 | -4.8  | 1.7  | -1.1 | ITGA2B | Homo sapiens integrin, alpha 2b (platelet glycoprotein IIb of IIb/IIIa complex, antigen CD41) (ITGA2B), mRNA [NM_000419] | 3674 |
| A_23_P36562  | -1.0 | -11.2 | -1.7 | -2.4 | ITGA5  | Homo sapiens integrin, alpha 5 (fibronectin receptor, alpha polypeptide) (ITGA5), mRNA [NM_002205]                       | 3678 |

|              |      |      |      |      |       |                                                                                                                                 |      |
|--------------|------|------|------|------|-------|---------------------------------------------------------------------------------------------------------------------------------|------|
| A_23_P128084 | 2.4  | 3.9  | -1.1 | 11.7 | ITGA7 | Homo sapiens integrin, alpha 7 (ITGA7), transcript variant 2, mRNA [NM_002206]                                                  | 3679 |
| A_24_P607904 | -1.0 | -1.0 | -2.8 | -2.3 | ITGA9 | integrin, alpha 9 [Source:HGNC Symbol;Acc:6145] [ENST00000264741]                                                               | 3680 |
| A_23_P218375 | 1.2  | 2.7  | 2.3  | 2.4  | ITGAE | Homo sapiens integrin, alpha E (antigen CD103, human mucosal lymphocyte antigen 1; alpha polypeptide) (ITGAE), mRNA [NM_002208] | 3682 |

|              |      |      |      |      |       |                                                                                                                                                            |      |
|--------------|------|------|------|------|-------|------------------------------------------------------------------------------------------------------------------------------------------------------------|------|
| A_24_P344251 | 2.1  | 1.4  | 1.0  | -1.0 | ITGAX | Homo sapiens integrin, alpha X (component 3 receptor 4 subunit) (ITGAX), mRNA [NM_000887]                                                                  | 3687 |
| A_23_P104199 | -1.7 | -2.0 | -1.7 | 1.1  | ITGB1 | Homo sapiens integrin, beta 1 (fibronectin receptor, beta polypeptide, antigen CD29 includes MDF2, MSK12) (ITGB1), transcript variant 1E, mRNA [NM_133376] | 3688 |

|              |      |      |       |      |       |                                                                                                                                                            |      |
|--------------|------|------|-------|------|-------|------------------------------------------------------------------------------------------------------------------------------------------------------------|------|
| A_32_P95397  | -1.0 | -1.0 | -23.2 | -1.1 | ITGB1 | Homo sapiens integrin, beta 1 (fibronectin receptor, beta polypeptide, antigen CD29 includes MDF2, MSK12) (ITGB1), transcript variant 1A, mRNA [NM_002211] | 3688 |
| A_23_P430411 | -1.0 | -1.0 | 2.1   | 1.4  | ITGB2 | integrin, beta 2 (component component 3 receptor 3 and 4 subunit) [Source:HGNC Symbol;Acc:6155] [ENST00000545414]                                          | 3689 |
| A_24_P929003 | -2.5 | 1.1  | 1.1   | 1.0  | ITGB3 | Homo sapiens integrin beta 3 mRNA, partial cds, alternatively spliced. [S70348]                                                                            | 3690 |

|              |      |      |      |       |        |                                                                                                      |      |
|--------------|------|------|------|-------|--------|------------------------------------------------------------------------------------------------------|------|
| A_23_P66355  | -2.1 | 2.1  | 1.3  | 1.5   | ITGB4  | Homo sapiens integrin, beta 4 (ITGB4), transcript variant 1, mRNA [NM_000213]                        | 3691 |
| A_23_P154217 | 2.3  | 2.3  | 5.4  | 2.5   | ITGB6  | Homo sapiens integrin, beta 6 (ITGB6), mRNA [NM_000888]                                              | 3694 |
| A_23_P76529  | 1.1  | 1.6  | 1.5  | -2.9  | ITGB7  | Homo sapiens integrin, beta 7 (ITGB7), mRNA [NM_000889]                                              | 3695 |
| A_23_P123060 | -1.4 | 1.0  | -1.0 | -15.5 | ITGB8  | Homo sapiens integrin, beta 8 (ITGB8), mRNA [NM_002214]                                              | 3696 |
| A_23_P408363 | -2.1 | -1.3 | 1.1  | -14.2 | ITGBL1 | integrin, beta-like 1 (with EGF-like repeat domains) [Source:HGNC Symbol;Acc:6164] [ENST00000490242] | 9358 |

|              |     |      |      |      |       |                                                                                                                         |      |
|--------------|-----|------|------|------|-------|-------------------------------------------------------------------------------------------------------------------------|------|
| A_23_P18223  | 1.4 | 1.7  | 2.1  | 1.9  | ITIH1 | Homo sapiens inter-alpha-trypsin inhibitor heavy chain 1 (ITIH1), transcript variant 1, mRNA [NM_002215]                | 3697 |
| A_23_P6822   | 1.3 | -2.3 | 1.4  | -1.2 | ITIH3 | Homo sapiens inter-alpha-trypsin inhibitor heavy chain 3 (ITIH3), mRNA [NM_002217]                                      | 3699 |
| A_23_P109881 | 1.9 | 1.4  | -1.1 | 2.2  | ITIH4 | Homo sapiens inter-alpha-trypsin inhibitor heavy chain family, member 4 (ITIH4), transcript variant 1, mRNA [NM_002218] | 3700 |

|              |      |      |      |     |       |                                                                                                                           |       |
|--------------|------|------|------|-----|-------|---------------------------------------------------------------------------------------------------------------------------|-------|
| A_23_P411993 | -1.0 | -2.3 | 1.2  | 1.3 | ITIH5 | Homo sapiens inter-alpha-trypsin inhibitor heavy chain family, member 5 (ITIH5), transcript variant 1, mRNA [NM_030569]   | 80760 |
| A_24_P220855 | 1.1  | 2.0  | 2.0  | 2.8 | ITIH5 | Homo sapiens inter-alpha-trypsin inhibitor heavy chain family, member 5 (ITIH5), transcript variant 3, mRNA [NM_00101851] | 80760 |
| A_24_P292253 | 1.0  | -1.0 | -2.9 | 1.0 | ITIH5 | Homo sapiens inter-alpha-trypsin inhibitor heavy chain family, member 5 (ITIH5), transcript variant 1, mRNA [NM_030569]   | 80760 |



|              |      |      |      |       |       |                                                                                                                         |       |
|--------------|------|------|------|-------|-------|-------------------------------------------------------------------------------------------------------------------------|-------|
| A_32_P44878  | 2.7  | 2.5  | -1.0 | -43.2 | ITIH5 | Homo sapiens inter-alpha-trypsin inhibitor heavy chain family, member 5 (ITIH5), transcript variant 1, mRNA [NM_030569] | 80760 |
| A_23_P354146 | -4.4 | 1.1  | 1.1  | 1.1   | ITK   | Homo sapiens IL2-inducible T-cell kinase (ITK), mRNA [NM_005546]                                                        | 3702  |
| A_23_P171074 | -1.0 | 1.1  | -2.3 | 1.0   | ITM2A | Homo sapiens integral membrane protein 2A (ITM2A), transcript variant 1, mRNA [NM_004867]                               | 9452  |
| A_24_P381604 | -1.5 | -3.0 | -3.4 | 1.0   | ITM2B | Homo sapiens integral membrane protein 2B (ITM2B), mRNA [NM_021999]                                                     | 9445  |

|              |      |      |      |      |       |                                                                                                  |       |
|--------------|------|------|------|------|-------|--------------------------------------------------------------------------------------------------|-------|
| A_24_P379820 | -2.5 | -4.5 | -1.3 | -2.9 | ITM2C | Homo sapiens integral membrane protein 2C (ITM2C), transcript variant 1, mRNA [NM_030926]        | 81618 |
| A_24_P167683 | -2.0 | -1.6 | -2.4 | -1.5 | ITPK1 | Homo sapiens inositol-tetrakisphosphate 1-kinase (ITPK1), transcript variant 1, mRNA [NM_014216] | 3705  |
| A_24_P119545 | 1.1  | 1.1  | 1.1  | 2.3  | ITPKB | inositol-trisphosphate 3-kinase B [Source:HGNC Symbol;Acc:6179] [ENST00000366784]                | 3707  |
| A_23_P208369 | 1.2  | 2.4  | 1.8  | 1.7  | ITPKC | Homo sapiens inositol-trisphosphate 3-kinase C (ITPKC), mRNA [NM_025194]                         | 80271 |

|              |      |      |      |      |        |                                                                                                    |       |
|--------------|------|------|------|------|--------|----------------------------------------------------------------------------------------------------|-------|
| A_23_P340333 | 2.5  | 1.9  | 2.3  | 1.0  | ITPRIP | Homo sapiens inositol 1,4,5-trisphosphate receptor interacting protein (ITPRIP), mRNA [NM_033397]  | 85450 |
| A_24_P111061 | 1.0  | -3.4 | 1.0  | 1.0  | ITSN1  | Homo sapiens intersectin 1 (SH3 domain protein) (ITSN1), transcript variant 2, mRNA [NM_001001132] | 6453  |
| A_23_P252962 | -5.7 | -1.2 | -2.8 | 1.1  | ITSN1  | Homo sapiens intersectin 1 (SH3 domain protein) (ITSN1), transcript variant 2, mRNA [NM_001001132] | 6453  |
| A_24_P239988 | -1.5 | -1.4 | -3.0 | -1.4 | ITSN2  | Homo sapiens intersectin 2 (ITSN2), transcript variant 1, mRNA [NM_006277]                         | 50618 |

|              |      |      |      |       |        |                                                                            |        |
|--------------|------|------|------|-------|--------|----------------------------------------------------------------------------|--------|
| A_23_P434347 | 1.5  | 2.5  | -3.2 | 1.0   | ITSN2  | Homo sapiens intersectin 2 (ITSN2), transcript variant 2, mRNA [NM_147152] | 50618  |
| A_23_P353524 | -1.3 | -2.3 | -5.5 | -5.1  | IVL    | Homo sapiens involucrin (IVL), mRNA [NM_005547]                            | 3713   |
| A_23_P165574 | 1.3  | -8.5 | 1.0  | 1.4   | IWS1   | Homo sapiens IWS1 homolog (S. cerevisiae) (IWS1), mRNA [NM_017969]         | 55677  |
| A_24_P340247 | 1.1  | -1.0 | -1.1 | -3.5  | IZUMO1 | Homo sapiens izumo sperm-egg fusion 1 (IZUMO1), mRNA [NM_182575]           | 284359 |
| A_23_P101521 | -1.1 | -1.1 | -1.2 | -29.7 | IZUMO2 | Homo sapiens IZUMO family member 2 (IZUMO2), mRNA [NM_152358]              | 126123 |

|              |      |      |      |      |         |                                                                                                                   |        |
|--------------|------|------|------|------|---------|-------------------------------------------------------------------------------------------------------------------|--------|
| A_23_P50674  | 2.7  | 1.7  | 5.7  | 1.6  | IZUMO4  | Homo sapiens IZUMO family member 4 (IZUMO4), transcript variant 1, mRNA [NM_001031735]                            | 113177 |
| A_23_P329112 | 1.1  | 1.1  | -9.1 | -1.0 | JAK3    | Homo sapiens Janus kinase 3 (JAK3), mRNA [NM_000215]                                                              | 3718   |
| A_24_P308096 | 5.3  | 9.0  | 1.1  | 1.5  | JAK3    | Homo sapiens Janus kinase 3 (JAK3), mRNA [NM_000215]                                                              | 3718   |
| A_23_P144274 | -1.0 | -1.0 | -2.8 | -1.4 | JAKMIP1 | Homo sapiens janus kinase and microtubule interacting protein 1 (JAKMIP1), transcript variant 2, mRNA [NM_144720] | 152789 |

|              |      |      |      |      |        |                                                                                                                        |       |
|--------------|------|------|------|------|--------|------------------------------------------------------------------------------------------------------------------------|-------|
| A_32_P310335 | 5.1  | 4.9  | 4.7  | 4.7  | JAM2   | junctional adhesion molecule 2<br>[Source:HGNC Symbol;Acc:14686]<br>[ENST00000480456]                                  | 58494 |
| A_23_P120667 | 1.9  | 2.7  | 2.1  | 1.1  | JAM2   | Homo sapiens junctional adhesion molecule 2 (JAM2), mRNA<br>[NM_021219]                                                | 58494 |
| A_23_P359897 | -3.6 | -1.0 | -1.0 | -1.0 | JHDM1D | Homo sapiens jumonji C domain containing histone demethylase 1 homolog D (S. cerevisiae) (JHDM1D), mRNA<br>[NM_030647] | 80853 |

|              |       |     |      |      |        |                                                                                                     |        |
|--------------|-------|-----|------|------|--------|-----------------------------------------------------------------------------------------------------|--------|
| A_23_P205584 | 1.0   | 1.2 | -5.4 | 1.0  | JKAMP  | Homo sapiens JNK1/MAPK8-associated membrane protein (JKAMP), transcript variant 1, mRNA [NM_016475] | 51528  |
| A_23_P300301 | -2.4  | 1.1 | -1.0 | -1.0 | JMJD1C | Homo sapiens jumonji domain containing 1C (JMJD1C), transcript variant 2, mRNA [NM_004241]          | 221037 |
| A_23_P115523 | -10.8 | 1.1 | -1.3 | -1.2 | JMJD4  | Homo sapiens jumonji domain containing 4 (JMJD4), transcript variant 1, mRNA [NM_023007]            | 65094  |
| A_23_P146865 | 2.3   | 1.4 | -1.0 | 1.5  | JMJD5  | Homo sapiens cDNA FLJ61151 complete cds. [AK298410]                                                 | 79831  |

|              |      |      |      |      |             |                                                                                                |        |
|--------------|------|------|------|------|-------------|------------------------------------------------------------------------------------------------|--------|
| A_23_P311616 | -5.4 | -2.2 | -1.9 | -2.3 | JMJD6       | Homo sapiens jumonji domain containing 6 (JMJD6), transcript variant 2, mRNA [NM_015167]       | 23210  |
| A_23_P403424 | 3.3  | 3.3  | 2.9  | 4.1  | JMJD7-PLA2G | Homo sapiens JMJD7-PLA2G4B readthrough (JMJD7-PLA2G4B), transcript variant 1, mRNA [NM_005090] | 8681   |
| A_23_P15073  | -1.6 | -2.7 | -1.0 | -2.2 | JMJD8       | Homo sapiens jumonji domain containing 8 (JMJD8), mRNA [NM_001005920]                          | 339123 |
| A_32_P176550 | -1.1 | -2.9 | -2.2 | -2.2 | JMY         | Homo sapiens junction mediating and regulatory protein, p53 cofactor (JMY), mRNA [NM_152405]   | 133746 |



|              |      |      |       |      |       |                                                                                        |        |
|--------------|------|------|-------|------|-------|----------------------------------------------------------------------------------------|--------|
| A_23_P67321  | -1.7 | 1.2  | -2.0  | 1.0  | JOSD2 | Homo sapiens Josephin domain containing 2 (JOSD2), mRNA [NM_138334]                    | 126119 |
| A_24_P194199 | 1.1  | -4.1 | -1.5  | 1.2  | JPH2  | Homo sapiens junctophilin 2 (JPH2), transcript variant 1, mRNA [NM_020433]             | 57158  |
| A_24_P150791 | 1.4  | 13.2 | 9.4   | 9.7  | JPH3  | Homo sapiens junctophilin 3 (JPH3), mRNA [NM_020655]                                   | 57338  |
| A_24_P938403 | -1.4 | -1.4 | -19.3 | -1.4 | JPH3  | Homo sapiens junctophilin 3, mRNA (cDNA clone IMAGE:3867947), complete cds. [BC008690] | 57338  |

|              |      |      |      |      |       |                                                                    |        |
|--------------|------|------|------|------|-------|--------------------------------------------------------------------|--------|
| A_23_P202737 | 2.1  | 1.1  | 2.1  | 1.4  | JRKL  | Homo sapiens jerky homolog-like (mouse) (JRKL), mRNA [NM_003772]   | 8690   |
| A_23_P4821   | 2.1  | 1.3  | 1.5  | -1.0 | JUNB  | Homo sapiens jun B proto-oncogene (JUNB), mRNA [NM_002229]         | 3726   |
| A_24_P143301 | -3.2 | -1.7 | -1.1 | -1.6 | KAAG1 | Homo sapiens kidney associated antigen 1 (KAAG1), mRNA [NM_181337] | 353219 |

|              |      |      |      |      |       |                                                                                                                                                                     |        |
|--------------|------|------|------|------|-------|---------------------------------------------------------------------------------------------------------------------------------------------------------------------|--------|
| A_24_P410797 | 2.1  | 2.0  | 1.9  | 2.5  | KALRN | Homo sapiens cDNA FLJ43991 fis, clone TESTI4019843, highly similar to Rattus norvegicus huntingtin-associated protein interacting protein (duo) (Hapip). [AK125979] | 8997   |
| A_23_P500130 | -1.0 | -5.7 | -1.1 | -1.0 | KANK1 | Homo sapiens KN motif and ankyrin repeat domains 1 (KANK1), transcript variant 2, mRNA [NM_153186]                                                                  | 23189  |
| A_24_P7693   | -1.0 | -1.5 | 1.1  | -2.1 | KANK3 | Homo sapiens KN motif and ankyrin repeat domains 3 (KANK3), mRNA [NM_198471]                                                                                        | 256949 |

|              |      |       |      |      |        |                                                                                           |       |
|--------------|------|-------|------|------|--------|-------------------------------------------------------------------------------------------|-------|
| A_24_P67929  | 1.0  | -1.4  | -1.4 | -2.8 | KANSL2 | Homo sapiens chromosome 12 open reading frame 41 (C12orf41), mRNA [NM_017822]             | 54934 |
| A_23_P66608  | 1.1  | 1.1   | -2.3 | 1.0  | KAT2A  | Homo sapiens K(lysine) acetyltransferase 2A (KAT2A), mRNA [NM_021078]                     | 2648  |
| A_23_P138849 | -2.6 | -10.2 | -6.6 | -5.6 | KAT5   | Homo sapiens K(lysine) acetyltransferase 5 (KAT5), transcript variant 2, mRNA [NM_006388] | 10524 |
| A_24_P928986 | 1.0  | -1.0  | -2.9 | -1.3 | KAT6A  | Homo sapiens cDNA FLJ14455 fis, clone HEMBB1001908. [AK027361]                            | 7994  |

|              |       |      |       |      |         |                                                                                                    |       |
|--------------|-------|------|-------|------|---------|----------------------------------------------------------------------------------------------------|-------|
| A_23_P388855 | -10.4 | -1.0 | -1.1  | -1.1 | KAT6B   | Homo sapiens K(lysine) acetyltransferase 6B (KAT6B), mRNA [NM_012330]                              | 23522 |
| A_23_P388851 | -3.0  | 1.9  | 1.2   | 1.2  | KAT6B   | Homo sapiens K(lysine) acetyltransferase 6B (KAT6B), mRNA [NM_012330]                              | 23522 |
| A_24_P927976 | -1.0  | -3.0 | -1.4  | 1.0  | KATNAL2 | Homo sapiens mRNA; cDNA DKFZp667C165 (from clone DKFZp667C165). [AL512748]                         | 83473 |
| A_24_P331830 | 1.2   | 1.2  | -11.1 | 1.2  | KAZN    | Homo sapiens kazrin, periplakin interacting protein (KAZN), transcript variant A, mRNA [NM_015209] | 23254 |

|              |      |     |      |      |         |                                                                                                    |        |
|--------------|------|-----|------|------|---------|----------------------------------------------------------------------------------------------------|--------|
| A_24_P246573 | 1.1  | 1.0 | -1.0 | -3.1 | KAZN    | Homo sapiens kazrin, periplakin interacting protein (KAZN), transcript variant A, mRNA [NM_015209] | 23254  |
| A_23_P94319  | -5.4 | 1.1 | 1.0  | 1.1  | KBTBD11 | Homo sapiens kelch repeat and BTB (POZ) domain containing 11 (KBTBD11), mRNA [NM_014867]           | 9920   |
| A_32_P88240  | 5.8  | 1.7 | 1.6  | 1.0  | KBTBD12 | Homo sapiens kelch repeat and BTB (POZ) domain containing 12 (KBTBD12), mRNA [NM_207335]           | 166348 |

|              |       |      |      |      |        |                                                                                                              |       |
|--------------|-------|------|------|------|--------|--------------------------------------------------------------------------------------------------------------|-------|
| A_23_P70951  | -1.0  | 4.4  | -1.0 | -1.0 | KBTBD2 | Homo sapiens kelch repeat and BTB (POZ) domain containing 2 (KBTBD2), mRNA [NM_015483]                       | 25948 |
| A_23_P202696 | 1.1   | -5.2 | 1.1  | 1.0  | KBTBD4 | Homo sapiens kelch repeat and BTB (POZ) domain containing 4 (KBTBD4), transcript variant 2, mRNA [NM_016506] | 55709 |
| A_23_P12950  | -16.9 | 1.1  | 1.1  | 1.1  | KBTBD4 | Homo sapiens kelch repeat and BTB (POZ) domain containing 4 (KBTBD4), transcript variant 2, mRNA [NM_016506] | 55709 |

|              |       |      |      |      |        |                                                                                        |       |
|--------------|-------|------|------|------|--------|----------------------------------------------------------------------------------------|-------|
| A_23_P392435 | -1.7  | -1.7 | -2.6 | -1.7 | KBTBD6 | Homo sapiens kelch repeat and BTB (POZ) domain containing 6 (KBTBD6), mRNA [NM_152903] | 89890 |
| A_23_P25605  | -1.2  | 3.8  | 1.5  | 2.9  | KBTBD7 | Homo sapiens kelch repeat and BTB (POZ) domain containing 7 (KBTBD7), mRNA [NM_032138] | 84078 |
| A_23_P431252 | -22.1 | 1.0  | -1.9 | -1.8 | KBTBD8 | Homo sapiens kelch repeat and BTB (POZ) domain containing 8 (KBTBD8), mRNA [NM_032505] | 84541 |



|              |      |      |      |      |        |                                                                                                                                            |      |
|--------------|------|------|------|------|--------|--------------------------------------------------------------------------------------------------------------------------------------------|------|
| A_23_P48229  | 4.9  | 4.7  | 4.2  | 3.1  | KCNA1  | Homo sapiens potassium voltage-gated channel, shaker-related subfamily, member 1 (episodic ataxia with myokymia) (KCNA1), mRNA [NM_000217] | 3736 |
| A_23_P126528 | -2.0 | -6.3 | -5.6 | -1.7 | KCNA10 | Homo sapiens potassium voltage-gated channel, shaker-related subfamily, member 10 (KCNA10), mRNA [NM_005549]                               | 3744 |
| A_23_P417173 | -2.1 | -2.2 | -2.2 | -2.2 | KCNA5  | Homo sapiens potassium voltage-gated channel, shaker-related subfamily, member 5 (KCNA5), mRNA [NM_002234]                                 | 3741 |

|              |      |      |      |      |        |                                                                                                                                        |      |
|--------------|------|------|------|------|--------|----------------------------------------------------------------------------------------------------------------------------------------|------|
| A_24_P87686  | -1.2 | -1.1 | -2.6 | -1.5 | KCNA7  | Homo sapiens potassium voltage-gated channel, shaker-related subfamily, member 7 (KCNA7), mRNA [NM_031886]                             | 3743 |
| A_24_P151    | -1.2 | -1.2 | -2.1 | -1.4 | KCNAB2 | Homo sapiens potassium voltage-gated channel, shaker-related subfamily, beta member 2 (KCNAB2), transcript variant 1, mRNA [NM_003636] | 8514 |
| A_23_P501232 | 1.2  | 2.7  | 1.3  | -1.6 | KCNAB2 | Homo sapiens potassium voltage-gated channel, shaker-related subfamily, beta member 2 (KCNAB2), transcript variant 1, mRNA [NM_003636] | 8514 |

|              |      |     |      |      |       |                                                                                                                                |      |
|--------------|------|-----|------|------|-------|--------------------------------------------------------------------------------------------------------------------------------|------|
| A_23_P139841 | 2.9  | 2.9 | 1.5  | 2.2  | KCNC2 | Homo sapiens potassium voltage-gated channel, Shaw-related subfamily, member 2 (KCNC2), transcript variant 2, mRNA [NM_139137] | 3747 |
| A_23_P101516 | 1.2  | 2.9 | 1.5  | 2.3  | KCNC3 | Homo sapiens potassium voltage-gated channel, Shaw-related subfamily, member 3 (KCNC3), mRNA [NM_004977]                       | 3748 |
| A_32_P140268 | -2.7 | 1.0 | -1.0 | -1.0 | KCND3 | potassium voltage-gated channel, Shal-related subfamily, member 3 [Source:HGNC Symbol;Acc:6239] [ENST00000369697]              | 3752 |

|              |      |      |       |      |       |                                                                                                                                   |       |
|--------------|------|------|-------|------|-------|-----------------------------------------------------------------------------------------------------------------------------------|-------|
| A_24_P941339 | 1.7  | 1.7  | -14.6 | 1.0  | KCNE1 | Homo sapiens potassium voltage-gated channel, Isk-related family, member 1 (KCNE1), transcript variant 2, mRNA [NM_000219]        | 3753  |
| A_23_P377882 | 3.5  | 1.8  | 4.8   | 2.0  | KCNH2 | Homo sapiens potassium voltage-gated channel, subfamily H (eag-related), member 2 (KCNH2), transcript variant 2, mRNA [NM_172056] | 3757  |
| A_24_P99145  | -2.7 | -1.3 | 1.2   | -1.1 | KCNH5 | Homo sapiens potassium voltage-gated channel, subfamily H (eag-related), member 5 (KCNH5), transcript variant 2, mRNA [NM_172376] | 27133 |

|             |      |      |      |      |        |                                                                                                                                   |       |
|-------------|------|------|------|------|--------|-----------------------------------------------------------------------------------------------------------------------------------|-------|
| A_23_P83558 | -1.6 | -2.5 | -1.5 | -1.5 | KCNH6  | Homo sapiens potassium voltage-gated channel, subfamily H (eag-related), member 6 (KCNH6), transcript variant 2, mRNA [NM_173092] | 81033 |
| A_23_P30554 | -6.9 | -1.6 | -4.0 | -4.1 | KCNIP1 | Homo sapiens Kv channel interacting protein 1 (KCNIP1), transcript variant 1, mRNA [NM_001034837]                                 | 30820 |
| A_24_P12998 | -1.0 | -1.1 | 1.4  | -2.4 | KCNIP2 | Homo sapiens Kv channel interacting protein 2 (KCNIP2), transcript variant 7, mRNA [NM_173197]                                    | 30819 |

|              |     |      |      |      |        |                                                                                                                                |      |
|--------------|-----|------|------|------|--------|--------------------------------------------------------------------------------------------------------------------------------|------|
| A_23_P202918 | 1.4 | 1.5  | 2.2  | -6.6 | KCNJ1  | Homo sapiens potassium inwardly-rectifying channel, subfamily J, member 1 (KCNJ1), transcript variant rom-k5, mRNA [NM_153767] | 3758 |
| A_24_P387875 | 1.8 | -2.7 | 1.7  | 1.0  | KCNJ10 | Homo sapiens potassium inwardly-rectifying channel, subfamily J, member 10 (KCNJ10), mRNA [NM_002241]                          | 3766 |
| A_24_P339429 | 1.1 | 1.1  | -2.1 | 1.0  | KCNJ12 | Homo sapiens potassium inwardly-rectifying channel, subfamily J, member 12 (KCNJ12), mRNA [NM_021012]                          | 3768 |

|              |       |      |      |      |        |                                                                                                                             |      |
|--------------|-------|------|------|------|--------|-----------------------------------------------------------------------------------------------------------------------------|------|
| A_23_P312752 | 1.7   | 1.7  | 2.1  | 1.8  | KCNJ13 | Homo sapiens potassium inwardly-rectifying channel, subfamily J, member 13 (KCNJ13), transcript variant 1, mRNA [NM_002242] | 3769 |
| A_23_P130764 | -1.6  | 2.4  | 2.4  | 1.9  | KCNJ14 | Homo sapiens potassium inwardly-rectifying channel, subfamily J, member 14 (KCNJ14), transcript variant 2, mRNA [NM_170720] | 3770 |
| A_23_P17655  | -26.2 | -1.1 | -1.2 | -1.1 | KCNJ15 | Homo sapiens potassium inwardly-rectifying channel, subfamily J, member 15 (KCNJ15), transcript variant 1, mRNA [NM_170736] | 3772 |

|              |      |     |      |     |        |                                                                                                                             |      |
|--------------|------|-----|------|-----|--------|-----------------------------------------------------------------------------------------------------------------------------|------|
| A_23_P501193 | 1.2  | 2.0 | -4.5 | 1.1 | KCNJ16 | Homo sapiens potassium inwardly-rectifying channel, subfamily J, member 16 (KCNJ16), transcript variant 2, mRNA [NM_170741] | 3773 |
| A_23_P329261 | 3.0  | 4.0 | 2.8  | 1.0 | KCNJ2  | Homo sapiens potassium inwardly-rectifying channel, subfamily J, member 2 (KCNJ2), mRNA [NM_000891]                         | 3759 |
| A_23_P153986 | -1.6 | 1.5 | -1.2 | 2.0 | KCNJ3  | Homo sapiens potassium inwardly-rectifying channel, subfamily J, member 3 (KCNJ3), mRNA [NM_002239]                         | 3760 |



|              |      |       |      |      |       |                                                                                                                           |      |
|--------------|------|-------|------|------|-------|---------------------------------------------------------------------------------------------------------------------------|------|
| A_24_P6125   | 1.0  | 1.0   | -1.0 | -2.1 | KCNJ4 | Homo sapiens potassium inwardly-rectifying channel, subfamily J, member 4 (KCNJ4), transcript variant 1, mRNA [NM_152868] | 3761 |
| A_24_P309521 | -1.0 | -15.3 | -1.0 | 1.2  | KCNJ5 | Homo sapiens potassium inwardly-rectifying channel, subfamily J, member 5 (KCNJ5), mRNA [NM_000890]                       | 3762 |
| A_23_P64879  | 4.0  | 1.3   | 2.4  | 6.1  | KCNJ8 | Homo sapiens potassium inwardly-rectifying channel, subfamily J, member 8 (KCNJ8), mRNA [NM_004982]                       | 3764 |

|              |     |      |      |     |        |                                                                                                         |       |
|--------------|-----|------|------|-----|--------|---------------------------------------------------------------------------------------------------------|-------|
| A_23_P65629  | 1.1 | -3.1 | 1.1  | 1.0 | KCNK10 | Homo sapiens potassium channel, subfamily K, member 10 (KCNK10), transcript variant 1, mRNA [NM_021161] | 54207 |
| A_23_P108883 | 2.2 | 2.5  | 2.1  | 3.1 | KCNK12 | Homo sapiens potassium channel, subfamily K, member 12 (KCNK12), mRNA [NM_022055]                       | 56660 |
| A_23_P210451 | 1.7 | 1.7  | -2.1 | 1.4 | KCNK15 | Homo sapiens potassium channel, subfamily K, member 15 (KCNK15), mRNA [NM_022358]                       | 60598 |

|              |      |      |      |      |        |                                                                                                         |       |
|--------------|------|------|------|------|--------|---------------------------------------------------------------------------------------------------------|-------|
| A_24_P112032 | 1.1  | -1.2 | -1.0 | -2.7 | KCNK17 | Homo sapiens potassium channel, subfamily K, member 17 (KCNK17), transcript variant 1, mRNA [NM_031460] | 89822 |
| A_23_P91104  | 1.1  | -1.3 | -1.2 | -3.5 | KCNK3  | Homo sapiens potassium channel, subfamily K, member 3 (KCNK3), mRNA [NM_002246]                         | 3777  |
| A_32_P805871 | -3.0 | 1.0  | 1.3  | -1.4 | KCNK4  | Homo sapiens potassium channel, subfamily K, member 4 (KCNK4), mRNA [NM_033310]                         | 50801 |
| A_23_P319423 | 1.9  | 2.5  | 2.5  | 2.8  | KCNK5  | Homo sapiens potassium channel, subfamily K, member 5 (KCNK5), mRNA [NM_003740]                         | 8645  |

|              |      |      |      |      |       |                                                                                                       |       |
|--------------|------|------|------|------|-------|-------------------------------------------------------------------------------------------------------|-------|
| A_23_P50591  | -1.1 | -2.8 | -1.2 | -1.1 | KCNK6 | Homo sapiens potassium channel, subfamily K, member 6 (KCNK6), mRNA [NM_004823]                       | 9424  |
| A_23_P86874  | 3.0  | 1.8  | -1.6 | 2.5  | KCNK7 | Homo sapiens potassium channel, subfamily K, member 7 (KCNK7), transcript variant A, mRNA [NM_033347] | 10089 |
| A_23_P111978 | 1.3  | -2.2 | -1.9 | -1.1 | KCNK9 | Homo sapiens potassium channel, subfamily K, member 9 (KCNK9), mRNA [NM_016601]                       | 51305 |

|              |       |      |      |      |        |                                                                                                                                                     |      |
|--------------|-------|------|------|------|--------|-----------------------------------------------------------------------------------------------------------------------------------------------------|------|
| A_32_P181222 | -10.1 | -1.2 | -1.3 | -2.4 | KCNMA1 | Homo sapiens potassium large conductance calcium-activated channel, subfamily M, alpha member 1 (KCNMA1), transcript variant 2, mRNA [NM_002247]    | 3778 |
| A_32_P192692 | 3.2   | 2.4  | 1.2  | 2.5  | KCNMA1 | Homo sapiens potassium large conductance calcium-activated channel, subfamily M, alpha member 1 (KCNMA1), transcript variant 1, mRNA [NM_001014797] | 3778 |

|              |      |       |      |      |        |                                                                                                                                                  |      |
|--------------|------|-------|------|------|--------|--------------------------------------------------------------------------------------------------------------------------------------------------|------|
| A_24_P156490 | 1.7  | 2.0   | 1.3  | 1.5  | KCNMA1 | Homo sapiens potassium large conductance calcium-activated channel, subfamily M, alpha member 1 (KCNMA1), transcript variant 2, mRNA [NM_002247] | 3778 |
| A_24_P916196 | -1.0 | -37.3 | -1.0 | -1.1 | KCNMA1 | Homo sapiens maxi-K channel HSLO mRNA, partial cds. [AF349445]                                                                                   | 3778 |
| A_24_P61150  | 1.0  | -3.0  | 1.2  | -1.8 | KCNMA1 | Homo sapiens potassium large conductance calcium-activated channel, subfamily M, alpha member 1 (KCNMA1), transcript variant 2, mRNA [NM_002247] | 3778 |

|              |     |     |     |     |        |                                                                                                                                  |      |
|--------------|-----|-----|-----|-----|--------|----------------------------------------------------------------------------------------------------------------------------------|------|
| A_24_P206121 | 1.7 | 4.6 | 2.4 | 2.1 | KCNMB1 | Homo sapiens potassium large conductance calcium-activated channel, subfamily M, beta member 1 (KCNMB1), mRNA [NM_004137]        | 3779 |
| A_23_P67529  | 1.1 | 2.0 | 1.5 | 1.0 | KCNN4  | Homo sapiens potassium intermediate/small conductance calcium-activated channel, subfamily N, member 4 (KCNN4), mRNA [NM_002250] | 3783 |

|              |      |      |      |      |       |                                                                                                                            |      |
|--------------|------|------|------|------|-------|----------------------------------------------------------------------------------------------------------------------------|------|
| A_23_P210400 | -1.5 | -1.5 | -1.5 | -4.8 | KCNQ2 | Homo sapiens potassium voltage-gated channel, KQT-like subfamily, member 2, mRNA (cDNA clone IMAGE:4154700). [BC020384]    | 3785 |
| A_23_P123393 | -2.3 | -1.5 | -3.0 | 1.1  | KCNQ3 | Homo sapiens potassium voltage-gated channel, KQT-like subfamily, member 3 (KCNQ3), transcript variant 1, mRNA [NM_004519] | 3786 |
| A_23_P34424  | 2.0  | 2.1  | -1.4 | -1.4 | KCNQ4 | Homo sapiens potassium voltage-gated channel, KQT-like subfamily, member 4 (KCNQ4), transcript variant 1, mRNA [NM_004700] | 9132 |



|              |      |      |      |      |       |                                                                                                                            |        |
|--------------|------|------|------|------|-------|----------------------------------------------------------------------------------------------------------------------------|--------|
| A_23_P167841 | -1.6 | 2.4  | 2.4  | 1.5  | KCNQ5 | Homo sapiens potassium voltage-gated channel, KQT-like subfamily, member 5 (KCNQ5), transcript variant 1, mRNA [NM_019842] | 56479  |
| A_23_P394377 | 2.5  | 1.2  | 2.3  | 1.4  | KCNRG | Homo sapiens potassium channel regulator (KCNRG), transcript variant 2, mRNA [NM_199464]                                   | 283518 |
| A_23_P321846 | 14.3 | 13.8 | 16.9 | 14.2 | KCNS1 | Homo sapiens potassium voltage-gated channel, delayed-rectifier, subfamily S, member 1 (KCNS1), mRNA [NM_002251]           | 3787   |

|              |       |      |      |      |       |                                                                                                                  |       |
|--------------|-------|------|------|------|-------|------------------------------------------------------------------------------------------------------------------|-------|
| A_24_P46911  | -44.2 | 1.1  | 1.0  | 1.0  | KCNS2 | Homo sapiens potassium voltage-gated channel, delayed-rectifier, subfamily S, member 2 (KCNS2), mRNA [NM_020697] | 3788  |
| A_23_P120103 | -1.0  | -2.2 | -1.7 | -1.3 | KCNS3 | Homo sapiens potassium voltage-gated channel, delayed-rectifier, subfamily S, member 3 (KCNS3), mRNA [NM_002252] | 3790  |
| A_24_P155169 | 1.3   | 1.9  | 1.6  | 2.0  | KCNT1 | Homo sapiens potassium channel, subfamily T, member 1 (KCNT1), mRNA [NM_020822]                                  | 57582 |

|              |      |      |      |      |       |                                                                                                                                                             |        |
|--------------|------|------|------|------|-------|-------------------------------------------------------------------------------------------------------------------------------------------------------------|--------|
| A_24_P246278 | -1.5 | -1.0 | -2.6 | -1.5 | KCP   | Homo sapiens<br>kielin/chor<br>din-like<br>protein<br>(KCP),<br>transcript<br>variant 2,<br>mRNA<br>[NM_1993<br>49]                                         | 375616 |
| A_23_P130343 | -2.8 | -1.0 | -1.1 | -1.1 | KCTD1 | Homo sapiens<br>potassium<br>channel<br>tetrameris<br>ation<br>domain<br>containing<br>1 (KCTD1),<br>transcript<br>variant 2,<br>mRNA<br>[NM_1989<br>91]    | 284252 |
| A_24_P643376 | 2.0  | -4.9 | -1.1 | -1.5 | KCTD1 | Homo sapiens<br>potassium<br>channel<br>tetrameris<br>ation<br>domain<br>containing<br>1 (KCTD1),<br>transcript<br>variant 3,<br>mRNA<br>[NM_0011<br>42730] | 284252 |

|              |      |       |      |      |        |                                                                                                                      |        |
|--------------|------|-------|------|------|--------|----------------------------------------------------------------------------------------------------------------------|--------|
| A_23_P44849  | -2.4 | -8.8  | -2.2 | -2.3 | KCTD13 | Homo sapiens potassium channel tetramerisation domain containing 13 (KCTD13), mRNA [NM_178863]                       | 253980 |
| A_23_P162165 | -1.0 | -2.3  | -1.1 | -1.1 | KCTD14 | Homo sapiens potassium channel tetramerisation domain containing 14 (KCTD14), mRNA [NM_023930]                       | 65987  |
| A_24_P22892  | 1.0  | -11.4 | -1.1 | -1.1 | KCTD15 | Homo sapiens potassium channel tetramerisation domain containing 15 (KCTD15), transcript variant 1, mRNA [NM_024076] | 79047  |

|              |      |      |      |      |        |                                                                                                |        |
|--------------|------|------|------|------|--------|------------------------------------------------------------------------------------------------|--------|
| A_24_P307808 | 1.4  | 1.3  | -2.0 | 1.2  | KCTD16 | Homo sapiens potassium channel tetramerisation domain containing 16 (KCTD16), mRNA [NM_020768] | 57528  |
| A_23_P402157 | 3.1  | -2.2 | 1.5  | -1.2 | KCTD17 | Homo sapiens potassium channel tetramerisation domain containing 17 (KCTD17), mRNA [NM_024681] | 79734  |
| A_23_P48327  | -2.9 | 2.2  | 1.9  | 1.3  | KCTD4  | Homo sapiens potassium channel tetramerisation domain containing 4 (KCTD4), mRNA [NM_198404]   | 386618 |

|              |      |      |      |      |       |                                                                                                                    |        |
|--------------|------|------|------|------|-------|--------------------------------------------------------------------------------------------------------------------|--------|
| A_23_P385246 | -2.2 | 1.3  | 1.1  | 1.2  | KCTD6 | Homo sapiens potassium channel tetramerisation domain containing 6 (KCTD6), transcript variant 1, mRNA [NM_153331] | 200845 |
| A_23_P157380 | 3.2  | 8.6  | 2.7  | 4.9  | KCTD7 | Homo sapiens potassium channel tetramerisation domain containing 7 (KCTD7), transcript variant 1, mRNA [NM_153033] | 154881 |
| A_24_P298334 | -1.0 | -4.0 | -1.1 | -1.0 | KCTD9 | Homo sapiens potassium channel tetramerisation domain containing 9 (KCTD9), mRNA [NM_017634]                       | 54793  |

|              |      |      |      |      |       |                                                                                                                                        |        |
|--------------|------|------|------|------|-------|----------------------------------------------------------------------------------------------------------------------------------------|--------|
| A_23_P388200 | -1.0 | -2.2 | -1.1 | -1.1 | KDEL2 | Homo sapiens KDEL (Lys-Asp-Glu-Leu) containing 2 (KDEL2), mRNA [NM_153705]                                                             | 143888 |
| A_23_P4913   | 1.3  | 1.9  | 2.6  | -8.5 | KDEL1 | Homo sapiens KDEL (Lys-Asp-Glu-Leu) endoplasmic reticulum protein retention receptor 1 (KDEL1), mRNA [NM_006801]                       | 10945  |
| A_24_P42517  | -1.9 | 1.0  | -2.1 | -1.3 | KDEL2 | Homo sapiens KDEL (Lys-Asp-Glu-Leu) endoplasmic reticulum protein retention receptor 2 (KDEL2), transcript variant 1, mRNA [NM_006854] | 11014  |

|              |      |      |      |      |       |                                                                                                                                        |        |
|--------------|------|------|------|------|-------|----------------------------------------------------------------------------------------------------------------------------------------|--------|
| A_23_P211504 | -5.4 | -1.2 | -1.8 | 1.2  | KDEL3 | Homo sapiens KDEL (Lys-Asp-Glu-Leu) endoplasmic reticulum protein retention receptor 3 (KDEL3), transcript variant 2, mRNA [NM_016657] | 11015  |
| A_23_P338401 | 1.6  | 1.6  | -3.9 | -1.0 | KDM1B | Homo sapiens lysine (K)-specific demethylase 1B (KDM1B), mRNA [NM_153042]                                                              | 221656 |
| A_23_P83917  | -2.3 | -2.7 | -3.7 | -1.5 | KDM2A | Homo sapiens lysine (K)-specific demethylase 2A (KDM2A), transcript variant 1, mRNA [NM_012308]                                        | 22992  |



|              |      |      |      |      |       |                                                                              |       |
|--------------|------|------|------|------|-------|------------------------------------------------------------------------------|-------|
| A_23_P204406 | 13.2 | 16.3 | 23.4 | 13.8 | KDM5A | Homo sapiens lysine (K)-specific demethylase 5A (KDM5A), mRNA [NM_001042603] | 5927  |
| A_23_P204408 | -1.0 | -1.1 | -3.5 | -1.1 | KDM5A | Homo sapiens lysine (K)-specific demethylase 5A (KDM5A), mRNA [NM_001042603] | 5927  |
| A_32_P70724  | 1.1  | 1.1  | 2.0  | -1.0 | KDM5B | Homo sapiens lysine (K)-specific demethylase 5B (KDM5B), mRNA [NM_006618]    | 10765 |
| A_23_P1038   | 2.9  | 5.4  | 1.5  | 1.7  | KDM5B | Homo sapiens lysine (K)-specific demethylase 5B (KDM5B), mRNA [NM_006618]    | 10765 |

|              |      |      |      |     |         |                                                                                                              |        |
|--------------|------|------|------|-----|---------|--------------------------------------------------------------------------------------------------------------|--------|
| A_23_P252758 | -1.2 | 2.0  | 1.9  | 1.5 | KEL     | Homo sapiens Kell blood group, metallo-endopeptidase (KEL), mRNA [NM_000420]                                 | 3792   |
| A_24_P261750 | 1.6  | 2.5  | 2.3  | 2.4 | KERA    | Homo sapiens keratocan (KERA), mRNA [NM_007035]                                                              | 11081  |
| A_32_P86905  | 3.1  | 3.4  | 2.6  | 1.0 | KGFLP2  | Homo sapiens keratinocyte growth factor-like protein 2 (KGFLP2), non-coding RNA [NR_003670]                  | 654466 |
| A_23_P366453 | -6.8 | -1.0 | -1.0 | 1.0 | KHDRBS2 | Homo sapiens KH domain containing, RNA binding, signal transduction associated 2 (KHDRBS2), mRNA [NM_152688] | 202559 |

|              |      |      |      |      |         |                                                                                                              |       |
|--------------|------|------|------|------|---------|--------------------------------------------------------------------------------------------------------------|-------|
| A_23_P257335 | -1.1 | 5.9  | 2.7  | 2.5  | KHDRBS3 | Homo sapiens KH domain containing, RNA binding, signal transduction associated 3 (KHDRBS3), mRNA [NM_006558] | 10656 |
| A_24_P205268 | -1.4 | 1.4  | -2.2 | -1.0 | KHNYN   | Homo sapiens KH and NYN domain containing (KHNYN), mRNA [NM_015299]                                          | 23351 |
| A_23_P16157  | 1.8  | 2.2  | 1.1  | -2.7 | KHSRP   | Homo sapiens KH-type splicing regulatory protein (KHSRP), mRNA [NM_003685]                                   | 8570  |
| A_24_P134235 | 1.1  | -4.1 | 1.7  | 1.4  | KHSRP   | Homo sapiens KH-type splicing regulatory protein (KHSRP), mRNA [NM_003685]                                   | 8570  |

|              |      |      |      |       |        |                                                                                       |        |
|--------------|------|------|------|-------|--------|---------------------------------------------------------------------------------------|--------|
| A_23_P386356 | 1.1  | 1.1  | -1.0 | -13.9 | KIF12  | Homo sapiens kinesin family member 12 (KIF12), mRNA [NM_138424]                       | 113220 |
| A_23_P95441  | -2.1 | -2.9 | -1.1 | -1.5  | KIF13B | Homo sapiens kinesin family member 13B (KIF13B), mRNA [NM_015254]                     | 23303  |
| A_23_P147388 | 2.1  | 2.8  | -1.2 | 1.5   | KIF13B | Homo sapiens kinesin family member 13B (KIF13B), mRNA [NM_015254]                     | 23303  |
| A_23_P400515 | 2.8  | 2.7  | 2.1  | 4.6   | KIF17  | Homo sapiens kinesin family member 17 (KIF17), transcript variant 1, mRNA [NM_020816] | 57576  |

|              |      |      |      |      |       |                                                                                       |        |
|--------------|------|------|------|------|-------|---------------------------------------------------------------------------------------|--------|
| A_24_P233014 | 1.6  | 1.4  | -3.2 | 1.6  | KIF19 | Homo sapiens kinesin family member 19 (KIF19), mRNA [NM_153209]                       | 124602 |
| A_32_P100830 | 1.6  | -1.1 | 2.3  | 1.7  | KIF19 | Homo sapiens kinesin family member 19 (KIF19), mRNA [NM_153209]                       | 124602 |
| A_23_P395460 | -1.2 | -2.9 | -1.3 | -1.6 | KIF1A | Homo sapiens kinesin family member 1A (KIF1A), transcript variant 2, mRNA [NM_004321] | 547    |
| A_23_P331638 | -2.5 | -4.2 | -1.1 | -1.0 | KIF1B | Homo sapiens kinesin family member 1B (KIF1B), transcript variant 1, mRNA [NM_015074] | 23095  |

|              |      |      |      |      |        |                                                                                         |       |
|--------------|------|------|------|------|--------|-----------------------------------------------------------------------------------------|-------|
| A_24_P649624 | -3.4 | -1.1 | -1.2 | -2.1 | KIF1B  | Homo sapiens kinesin family member 1B (KIF1B), transcript variant 2, mRNA [NM_183416]   | 23095 |
| A_23_P126888 | 2.3  | -1.6 | 2.8  | 2.2  | KIF21B | Homo sapiens kinesin family member 21B (KIF21B), transcript variant 2, mRNA [NM_017596] | 23046 |
| A_23_P71741  | 2.1  | -1.5 | 2.6  | 1.4  | KIF27  | Homo sapiens kinesin family member 27 (KIF27), mRNA [NM_017576]                         | 55582 |
| A_23_P34788  | 1.2  | 1.3  | 2.3  | 1.1  | KIF2C  | Homo sapiens kinesin family member 2C (KIF2C), mRNA [NM_006845]                         | 11004 |

|              |      |      |      |      |       |                                                                                       |        |
|--------------|------|------|------|------|-------|---------------------------------------------------------------------------------------|--------|
| A_23_P17560  | 1.1  | -2.7 | -1.0 | -1.0 | KIF3B | Homo sapiens kinesin family member 3B (KIF3B), mRNA [NM_004798]                       | 9371   |
| A_24_P227375 | -2.2 | -2.2 | -3.6 | -2.4 | KIF5A | kinesin family member 5A [Source:HGNC Symbol;Acc:6323] [ENST00000455537]              | 3798   |
| A_24_P203689 | 1.1  | 1.1  | -2.5 | -1.0 | KIF7  | Homo sapiens kinesin family member 7 (KIF7), mRNA [NM_198525]                         | 374654 |
| A_23_P54576  | -1.1 | 3.6  | 1.7  | 1.1  | KIFC3 | Homo sapiens kinesin family member C3 (KIFC3), transcript variant 1, mRNA [NM_005550] | 3801   |

|              |      |      |      |      |         |                                                                                                                           |           |
|--------------|------|------|------|------|---------|---------------------------------------------------------------------------------------------------------------------------|-----------|
| A_23_P202067 | 2.4  | -2.1 | -1.4 | 2.7  | KIN     | Homo sapiens KIN, antigenic determinant of recA protein homolog (mouse) (KIN), mRNA [NM_012311]                           | 22944     |
| A_23_P50571  | 1.7  | 2.1  | -1.1 | 1.3  | KIR2DL2 | Homo sapiens killer cell immunoglobulin-like receptor, two domains, long cytoplasmic tail, 2 (KIR2DL2), mRNA [NM_014219]  | 3803      |
| A_23_P130815 | -2.5 | -1.1 | -1.9 | -1.2 | KIR2DS2 | Homo sapiens killer cell immunoglobulin-like receptor, two domains, short cytoplasmic tail, 2 (KIR2DS2), mRNA [NM_012312] | 100132285 |



|              |      |      |      |      |         |                                                                                                                            |      |
|--------------|------|------|------|------|---------|----------------------------------------------------------------------------------------------------------------------------|------|
| A_24_P87746  | -3.0 | -2.4 | 1.3  | -1.2 | KIR2DS4 | Homo sapiens killer cell immunoglobulin-like receptor, two domains, short cytoplasmic tail, 4 (KIR2DS4), mRNA [NM_012314]  | 3809 |
| A_23_P78840  | -1.2 | -1.2 | -4.4 | -1.3 | KIR2DS4 | Homo sapiens killer cell immunoglobulin-like receptor, two domains, short cytoplasmic tail, 4 (KIR2DS4), mRNA [NM_012314]  | 3809 |
| A_24_P117147 | 5.8  | 2.9  | 1.7  | 3.0  | KIR3DL1 | Homo sapiens killer cell immunoglobulin-like receptor, three domains, long cytoplasmic tail, 1 (KIR3DL1), mRNA [NM_013289] | 3811 |

|              |      |      |      |      |         |                                                                                                |       |
|--------------|------|------|------|------|---------|------------------------------------------------------------------------------------------------|-------|
| A_24_P393312 | 1.0  | -1.0 | -1.1 | -2.6 | KIRREL  | Homo sapiens cDNA FLJ33235 fis, clone ASTRO2002202. [AK090554]                                 | 55243 |
| A_23_P113994 | 2.2  | 1.1  | 1.0  | 1.8  | KIRREL  | Homo sapiens kin of IRRE like (Drosophila) (KIRREL), mRNA [NM_018240]                          | 55243 |
| A_23_P104741 | -1.0 | 5.3  | 2.4  | 1.4  | KIRREL3 | Homo sapiens kin of IRRE like 3 (Drosophila) (KIRREL3), transcript variant 1, mRNA [NM_032531] | 84623 |
| A_24_P133253 | -2.6 | -2.0 | -1.1 | -1.9 | KITLG   | Homo sapiens KIT ligand (KITLG), transcript variant b, mRNA [NM_000899]                        | 4254  |

|              |      |      |      |      |      |                                                                                   |        |
|--------------|------|------|------|------|------|-----------------------------------------------------------------------------------|--------|
| A_23_P2873   | -2.3 | 2.2  | 2.0  | 2.1  | KLC1 | Homo sapiens kinesin light chain 1 (KLC1), transcript variant 2, mRNA [NM_182923] | 3831   |
| A_24_P922877 | -2.7 | -1.3 | -3.2 | -1.3 | KLC1 | Homo sapiens kinesin light chain 1 (KLC1), transcript variant 2, mRNA [NM_182923] | 3831   |
| A_24_P227211 | -1.3 | -1.3 | -3.0 | -2.8 | KLC2 | Homo sapiens kinesin light chain 2 (KLC2), transcript variant 1, mRNA [NM_022822] | 64837  |
| A_23_P317098 | -3.5 | -1.1 | 1.3  | -1.1 | KLC3 | Homo sapiens kinesin light chain 3 (KLC3), mRNA [NM_177417]                       | 147700 |
| A_23_P4653   | 1.9  | 2.0  | 1.3  | 3.2  | KLC3 | kinesin light chain 3 [Source:HGNC Symbol;Acc:20717] [ENST00000494686]            | 147700 |

|              |      |      |      |      |       |                                                                                     |       |
|--------------|------|------|------|------|-------|-------------------------------------------------------------------------------------|-------|
| A_23_P133799 | 2.1  | 3.0  | 3.0  | -1.1 | KLC4  | Homo sapiens kinesin light chain 4 (KLC4), transcript variant 3, mRNA [NM_201523]   | 89953 |
| A_23_P397308 | -2.1 | -1.8 | -2.2 | -2.3 | KLC4  | Homo sapiens kinesin light chain 4 (KLC4), transcript variant 4, mRNA [NM_138343]   | 89953 |
| A_23_P383377 | 1.2  | -3.3 | -1.0 | 2.1  | KLF1  | Homo sapiens Kruppel-like factor 1 (erythroid) (KLF1), mRNA [NM_006563]             | 10661 |
| A_23_P319512 | -1.4 | -2.3 | -1.5 | -1.4 | KLF11 | Homo sapiens Kruppel-like factor 11 (KLF11), transcript variant 1, mRNA [NM_003597] | 8462  |

|              |      |      |      |      |       |                                                                     |        |
|--------------|------|------|------|------|-------|---------------------------------------------------------------------|--------|
| A_23_P354805 | -1.1 | -2.0 | -1.3 | -1.5 | KLF12 | Homo sapiens Kruppel-like factor 12 (KLF12), mRNA [NM_007249]       | 11278  |
| A_23_P393627 | -2.1 | -1.5 | -2.5 | -2.0 | KLF14 | Homo sapiens Kruppel-like factor 14 (KLF14), mRNA [NM_138693]       | 136259 |
| A_24_P20327  | -4.3 | 1.1  | 1.0  | 1.1  | KLF15 | Homo sapiens Kruppel-like factor 15 (KLF15), mRNA [NM_014079]       | 28999  |
| A_24_P151305 | 1.1  | -1.3 | -1.6 | -2.8 | KLF2  | Homo sapiens Kruppel-like factor 2 (lung) (KLF2), mRNA [NM_016270]  | 10365  |
| A_23_P213306 | 1.7  | -4.1 | 2.1  | 1.2  | KLF3  | Homo sapiens Kruppel-like factor 3 (basic) (KLF3), mRNA [NM_016531] | 51274  |

|              |      |      |      |      |         |                                                                                   |        |
|--------------|------|------|------|------|---------|-----------------------------------------------------------------------------------|--------|
| A_23_P32233  | 1.1  | 3.3  | 1.1  | 1.2  | KLF4    | Homo sapiens Kruppel-like factor 4 (gut) (KLF4), mRNA [NM_004235]                 | 9314   |
| A_24_P932981 | 1.1  | 1.1  | 2.4  | -1.0 | KLF6    | Homo sapiens Kruppel-like factor 6 (KLF6), transcript variant A, mRNA [NM_001300] | 1316   |
| A_32_P164513 | 1.1  | 1.1  | -2.4 | 1.2  | KLHDC1  | Homo sapiens kelch domain containing 1 (KLHDC1), mRNA [NM_172193]                 | 122773 |
| A_24_P342127 | -2.1 | -1.0 | -1.2 | -1.3 | KLHDC10 | Homo sapiens kelch domain containing 10 (KLHDC10), mRNA [NM_014997]               | 23008  |

|              |      |      |      |      |         |                                                                                         |        |
|--------------|------|------|------|------|---------|-----------------------------------------------------------------------------------------|--------|
| A_24_P299429 | 9.2  | 8.9  | 8.0  | 8.1  | KLHDC10 | Homo sapiens kelch domain containing 10 (KLHDC10), mRNA [NM_014997]                     | 23008  |
| A_32_P189680 | 1.0  | -1.0 | 6.5  | -1.1 | KLHDC10 | Homo sapiens kelch domain containing 10 (KLHDC10), mRNA [NM_014997]                     | 23008  |
| A_24_P116242 | -1.7 | -2.1 | -1.5 | -1.5 | KLHDC2  | Homo sapiens kelch domain containing 2 (KLHDC2), mRNA [NM_014315]                       | 23588  |
| A_23_P156568 | -1.0 | 1.1  | -1.1 | -2.7 | KLHDC3  | Homo sapiens kelch domain containing 3 (KLHDC3), transcript variant 1, mRNA [NM_057161] | 116138 |

|              |      |      |      |      |         |                                                                     |        |
|--------------|------|------|------|------|---------|---------------------------------------------------------------------|--------|
| A_24_P304485 | -2.3 | 1.0  | 1.1  | 1.0  | KLHDC5  | Homo sapiens kelch domain containing 5 (KLHDC5), mRNA [NM_020782]   | 57542  |
| A_24_P645765 | -4.8 | 1.0  | -1.0 | 1.0  | KLHDC5  | Homo sapiens kelch domain containing 5 (KLHDC5), mRNA [NM_020782]   | 57542  |
| A_24_P940576 | -3.0 | -1.0 | -1.1 | -1.1 | KLHDC5  | Homo sapiens kelch domain containing 5 (KLHDC5), mRNA [NM_020782]   | 57542  |
| A_23_P422131 | -3.3 | 2.2  | 2.5  | 2.3  | KLHDC7A | Homo sapiens kelch domain containing 7A (KLHDC7A), mRNA [NM_152375] | 127707 |



|              |      |      |      |      |         |                                                                     |        |
|--------------|------|------|------|------|---------|---------------------------------------------------------------------|--------|
| A_24_P117410 | 2.7  | 3.9  | 5.2  | -2.3 | KLHDC7B | Homo sapiens kelch domain containing 7B (KLHDC7B), mRNA [NM_138433] | 113730 |
| A_24_P62800  | -1.0 | -2.1 | -1.1 | -1.2 | KLHDC8A | Homo sapiens kelch domain containing 8A (KLHDC8A), mRNA [NM_018203] | 55220  |
| A_23_P125117 | 2.8  | 1.6  | 2.5  | 1.3  | KLHDC8B | Homo sapiens kelch domain containing 8B (KLHDC8B), mRNA [NM_173546] | 200942 |
| A_24_P148836 | -2.7 | -1.0 | -1.1 | -1.0 | KLHDC8B | Homo sapiens kelch domain containing 8B (KLHDC8B), mRNA [NM_173546] | 200942 |

|              |      |      |      |      |        |                                                                                          |       |
|--------------|------|------|------|------|--------|------------------------------------------------------------------------------------------|-------|
| A_24_P242609 | 1.0  | -2.5 | -6.4 | -1.0 | KLHL12 | Homo sapiens kelch-like 12 (Drosophila) (KLHL12), mRNA [NM_021633]                       | 59349 |
| A_23_P159974 | 1.2  | 1.2  | -4.1 | 1.4  | KLHL13 | Homo sapiens kelch-like 13 (Drosophila) (KLHL13), transcript variant 1, mRNA [NM_033495] | 90293 |
| A_32_P75357  | -3.3 | 1.0  | 1.5  | 1.6  | KLHL14 | kelch-like 14 (Drosophila) [Source:HGNC Symbol;Acc:29266] [ENST00000358095]              | 57565 |
| A_32_P136967 | -1.4 | 1.6  | -2.8 | 2.0  | KLHL15 | Homo sapiens kelch-like 15 (Drosophila) (KLHL15), mRNA [NM_030624]                       | 80311 |

|              |      |      |      |      |        |                                                                    |        |
|--------------|------|------|------|------|--------|--------------------------------------------------------------------|--------|
| A_23_P342910 | -4.5 | 1.1  | 1.0  | 1.1  | KLHL15 | Homo sapiens kelch-like 15 (Drosophila) (KLHL15), mRNA [NM_030624] | 80311  |
| A_32_P359110 | 1.4  | 1.7  | 1.4  | -2.1 | KLHL17 | Homo sapiens kelch-like 17 (Drosophila) (KLHL17), mRNA [NM_198317] | 339451 |
| A_24_P208721 | -1.0 | 2.2  | 1.2  | 1.3  | KLHL18 | Homo sapiens kelch-like 18 (Drosophila) (KLHL18), mRNA [NM_025010] | 23276  |
| A_23_P201478 | 1.0  | -1.1 | -4.0 | 1.2  | KLHL21 | Homo sapiens kelch-like 21 (Drosophila) (KLHL21), mRNA [NM_014851] | 9903   |

|              |      |      |      |      |        |                                                                                          |        |
|--------------|------|------|------|------|--------|------------------------------------------------------------------------------------------|--------|
| A_24_P117323 | -1.8 | 2.6  | -2.3 | -1.3 | KLHL22 | Homo sapiens kelch-like 22 (Drosophila) (KLHL22), transcript variant 1, mRNA [NM_032775] | 84861  |
| A_23_P205659 | 3.0  | 2.0  | 2.0  | -1.1 | KLHL28 | Homo sapiens mRNA for BTB (POZ) domain containing 5 variant, clone: COL03244. [AK225183] | 54813  |
| A_23_P431263 | 1.0  | -1.0 | -4.9 | -1.1 | KLHL29 | Homo sapiens cDNA FLJ14106 fis, clone MAMMA100122. [AK024168]                            | 114818 |
| A_23_P133543 | 29.3 | 28.7 | 26.9 | 20.4 | KLHL3  | Homo sapiens kelch-like 3 (Drosophila) (KLHL3), mRNA [NM_017415]                         | 26249  |

|              |      |      |      |       |        |                                                                                        |        |
|--------------|------|------|------|-------|--------|----------------------------------------------------------------------------------------|--------|
| A_23_P16754  | 1.1  | 1.3  | -2.5 | -30.8 | KLHL30 | Homo sapiens kelch-like 30 (Drosophila) (KLHL30), mRNA [NM_198582]                     | 377007 |
| A_32_P823560 | 2.8  | 1.1  | 1.7  | 1.1   | KLHL33 | Homo sapiens kelch-like 33 (Drosophila) (KLHL33), mRNA [NM_001109997]                  | 123103 |
| A_24_P192978 | -3.1 | -1.1 | 1.6  | 1.4   | KLHL35 | Homo sapiens kelch-like 35 (Drosophila) (KLHL35), mRNA [NM_001039548]                  | 283212 |
| A_24_P353486 | -1.0 | 1.2  | -3.2 | -3.3  | KLHL4  | Homo sapiens kelch-like 4 (Drosophila) (KLHL4), transcript variant 2, mRNA [NM_057162] | 56062  |

|              |      |      |      |      |       |                                                                                        |       |
|--------------|------|------|------|------|-------|----------------------------------------------------------------------------------------|-------|
| A_23_P121527 | 1.1  | -2.6 | -1.1 | -1.0 | KLHL5 | Homo sapiens kelch-like 5 (Drosophila) (KLHL5), transcript variant 1, mRNA [NM_015990] | 51088 |
| A_24_P944253 | -5.2 | 1.0  | -1.1 | -1.0 | KLHL6 | Homo sapiens kelch-like 6 (Drosophila) (KLHL6), mRNA [NM_130446]                       | 89857 |
| A_23_P212655 | 3.5  | 4.1  | 1.9  | 3.5  | KLHL6 | Homo sapiens kelch-like 6 (Drosophila) (KLHL6), mRNA [NM_130446]                       | 89857 |
| A_23_P324994 | -3.1 | 1.0  | -1.1 | 1.0  | KLHL7 | Homo sapiens kelch-like 7 (Drosophila) (KLHL7), transcript variant 2, mRNA [NM_018846] | 55975 |

|              |      |      |      |      |       |                                                                                              |       |
|--------------|------|------|------|------|-------|----------------------------------------------------------------------------------------------|-------|
| A_23_P107911 | -1.1 | -1.1 | -2.9 | -1.2 | KLK10 | Homo sapiens kallikrein-related peptidase 10 (KLK10), transcript variant 1, mRNA [NM_002776] | 5655  |
| A_24_P399490 | 1.5  | 1.4  | -1.6 | 2.4  | KLK10 | Homo sapiens kallikrein-related peptidase 10 (KLK10), transcript variant 1, mRNA [NM_002776] | 5655  |
| A_24_P416645 | 1.5  | -3.8 | -1.0 | -1.0 | KLK13 | Homo sapiens kallikrein-related peptidase 13 (KLK13), mRNA [NM_015596]                       | 26085 |
| A_23_P78717  | -1.4 | 2.3  | -1.0 | -1.3 | KLK14 | Homo sapiens kallikrein-related peptidase 14 (KLK14), mRNA [NM_022046]                       | 43847 |

|              |      |      |      |      |       |                                                                                              |       |
|--------------|------|------|------|------|-------|----------------------------------------------------------------------------------------------|-------|
| A_23_P4856   | -1.0 | -1.1 | -2.9 | 1.6  | KLK15 | Homo sapiens kallikrein-related peptidase 15 (KLK15), transcript variant 3, mRNA [NM_138564] | 55554 |
| A_24_P5750   | -1.2 | -1.3 | 1.6  | -2.7 | KLK2  | Homo sapiens kallikrein-related peptidase 2 (KLK2), transcript variant 1, mRNA [NM_005551]   | 3817  |
| A_24_P922015 | -1.6 | -1.8 | -1.8 | -3.1 | KLK2  | Homo sapiens prostate-specific KLK2 mRNA, complete cds, alternatively spliced. [AF336106]    | 3817  |
| A_23_P153480 | -1.5 | -1.1 | -2.0 | 1.8  | KLK5  | Homo sapiens kallikrein-related peptidase 5 (KLK5), transcript variant 1, mRNA [NM_012427]   | 25818 |



|              |     |      |      |      |       |                                                                                               |        |
|--------------|-----|------|------|------|-------|-----------------------------------------------------------------------------------------------|--------|
| A_23_P119311 | 1.7 | -2.4 | -3.4 | 1.0  | KLK9  | Homo sapiens kallikrein-related peptidase 9 (KLK9), mRNA [NM_012315]                          | 284366 |
| A_23_P99275  | 1.1 | 1.0  | 1.3  | -2.9 | KLRB1 | Homo sapiens killer cell lectin-like receptor subfamily B, member 1 (KLRB1), mRNA [NM_002258] | 3820   |
| A_23_P218058 | 1.0 | -2.6 | -1.0 | 1.0  | KLRC4 | Homo sapiens killer cell lectin-like receptor subfamily C, member 4 (KLRC4), mRNA [NM_013431] | 8302   |
| A_32_P158966 | 1.0 | 1.0  | -1.0 | 4.5  | KLRF1 | Homo sapiens killer cell lectin-like receptor subfamily F, member 1 (KLRF1), mRNA [NM_016523] | 51348  |

|              |      |      |     |      |       |                                                                                                                                           |        |
|--------------|------|------|-----|------|-------|-------------------------------------------------------------------------------------------------------------------------------------------|--------|
| A_23_P8723   | -1.0 | -2.5 | 1.2 | 1.4  | KLRG2 | Homo sapiens killer cell lectin-like receptor subfamily G, member 2, mRNA (cDNA clone MGC:131846 IMAGE:6139360), complete cds. [BC110858] | 346689 |
| A_32_P33263  | 1.8  | 1.7  | 2.3 | 1.0  | KLRG2 | Homo sapiens cDNA FLJ44186 fis, clone THYMU2038797, weakly similar to B locus C type Lectin. [AK126174]                                   | 346689 |
| A_23_P200838 | 1.6  | 1.8  | 2.2 | -1.3 | KMO   | Homo sapiens kynurenine 3-monooxygenase (kynurenine 3-hydroxylase) (KMO), mRNA [NM_003679]                                                | 8564   |

|              |      |      |      |      |       |                                                                                                                     |        |
|--------------|------|------|------|------|-------|---------------------------------------------------------------------------------------------------------------------|--------|
| A_24_P383050 | 1.1  | 1.3  | 1.6  | -2.7 | KNCN  | Homo sapiens kinocilin (KNCN), mRNA [NM_001097611]                                                                  | 148930 |
| A_24_P32574  | 1.3  | -1.1 | -3.6 | -1.9 | KNDC1 | Homo sapiens kinase non-catalytic C-lobe domain (KIND) containing 1 (KNDC1), transcript variant 1, mRNA [NM_152643] | 85442  |
| A_23_P414312 | -5.3 | 1.0  | 1.1  | 1.0  | KNDC1 | Homo sapiens kinase non-catalytic C-lobe domain (KIND) containing 1 (KNDC1), transcript variant 1, mRNA [NM_152643] | 85442  |

|              |      |      |      |      |       |                                                                                                         |       |
|--------------|------|------|------|------|-------|---------------------------------------------------------------------------------------------------------|-------|
| A_24_P940680 | 1.0  | -1.0 | -1.1 | -2.1 | KNDC1 | kinase non-catalytic C-lobe domain (KIND) containing 1 [Source:HGNC Symbol;Acc:29374] [ENST00000497778] | 85442 |
| A_32_P230808 | 3.5  | 2.8  | 1.2  | 1.4  | KNG1  | Homo sapiens kininogen 1 (KNG1), transcript variant 2, mRNA [NM_000893]                                 | 3827  |
| A_23_P212258 | 1.4  | -1.2 | 1.8  | -2.2 | KNG1  | Homo sapiens kininogen 1 (KNG1), transcript variant 2, mRNA [NM_000893]                                 | 3827  |
| A_23_P139950 | -3.8 | -1.0 | -4.1 | -3.1 | KPNA3 | Homo sapiens karyopherin alpha 3 (importin alpha 4) (KPNA3), mRNA [NM_002267]                           | 3839  |

|              |      |      |      |      |       |                                                                               |       |
|--------------|------|------|------|------|-------|-------------------------------------------------------------------------------|-------|
| A_24_P11791  | 4.3  | 3.3  | -1.5 | 3.7  | KPNA4 | Homo sapiens karyopherin alpha 4 (importin alpha 3) (KPNA4), mRNA [NM_002268] | 3840  |
| A_32_P3127   | -5.6 | -2.4 | -1.5 | -2.1 | KPNA4 | Homo sapiens karyopherin alpha 4 (importin alpha 3) (KPNA4), mRNA [NM_002268] | 3840  |
| A_23_P218835 | -1.3 | -4.4 | -2.2 | -2.4 | KPNA4 | Homo sapiens karyopherin alpha 4 (importin alpha 3) (KPNA4), mRNA [NM_002268] | 3840  |
| A_24_P128563 | -1.5 | 1.4  | 2.1  | 2.3  | KPNA6 | Homo sapiens karyopherin alpha 6 (importin alpha 7) (KPNA6), mRNA [NM_012316] | 23633 |

|              |      |      |      |      |       |                                                                                                                |       |
|--------------|------|------|------|------|-------|----------------------------------------------------------------------------------------------------------------|-------|
| A_23_P118774 | -4.1 | -1.1 | 1.1  | -1.1 | KPNB1 | Homo sapiens karyopherin (importin) beta 1 (KPNB1), mRNA [NM_002265]                                           | 3837  |
| A_23_P67391  | 1.1  | 1.4  | 2.4  | 1.2  | KPTN  | Homo sapiens kaptin (actin binding protein) (KPTN), mRNA [NM_007059]                                           | 11133 |
| A_24_P927287 | -1.2 | -1.2 | -9.8 | -1.4 | KRAS  | Homo sapiens v-Ki-ras2 Kirsten rat sarcoma viral oncogene homolog, mRNA (cDNA clone IMAGE:5301134). [BC029545] | 3845  |
| A_32_P38637  | 2.0  | 1.7  | 1.1  | 1.3  | KRBA1 | Homo sapiens KRAB-A domain containing 1 (KRBA1), mRNA [NM_032534]                                              | 84626 |

|             |      |      |      |      |         |                                                                                                              |           |
|-------------|------|------|------|------|---------|--------------------------------------------------------------------------------------------------------------|-----------|
| A_23_P80551 | -2.9 | -1.4 | -1.4 | -1.3 | KRBOX1  | Homo sapiens KRAB box domain containing 1 (KRBOX1), mRNA [NM_001205272]                                      | 100506243 |
| A_23_P56759 | 1.3  | 2.4  | 2.3  | 4.0  | KRCC1   | Homo sapiens lysine-rich coiled-coil 1 (KRCC1), mRNA [NM_016618]                                             | 51315     |
| A_23_P68851 | 1.4  | 1.6  | 1.1  | 2.4  | KREMEN1 | Homo sapiens kringle containing transmembrane protein 1 (KREMEN1), transcript variant 3, mRNA [NM_001039570] | 83999     |
| A_23_P42848 | -1.0 | -1.0 | -1.0 | 3.5  | KRIT1   | Homo sapiens KRIT1, ankyrin repeat containing (KRIT1), transcript variant 4, mRNA [NM_194455]                | 889       |

|              |      |      |      |      |       |                                                                                                       |       |
|--------------|------|------|------|------|-------|-------------------------------------------------------------------------------------------------------|-------|
| A_23_P2216   | -1.0 | -2.1 | -1.1 | -1.1 | KRR1  | Homo sapiens KRR1, small subunit (SSU) processome component, homolog (yeast) (KRR1), mRNA [NM_007043] | 11103 |
| A_23_P55448  | 1.0  | 1.0  | -1.1 | -2.9 | KRT12 | Homo sapiens keratin 12 (KRT12), mRNA [NM_000223]                                                     | 3859  |
| A_24_P228149 | 2.1  | 3.6  | 2.3  | 5.1  | KRT13 | Homo sapiens keratin 13 (KRT13), transcript variant 2, mRNA [NM_002274]                               | 3860  |
| A_24_P265346 | 9.0  | 14.7 | 8.7  | 9.4  | KRT14 | Homo sapiens keratin 14 (KRT14), mRNA [NM_000526]                                                     | 3861  |
| A_23_P4335   | -4.2 | -1.6 | -1.1 | -1.0 | KRT14 | Homo sapiens keratin 14 (KRT14), mRNA [NM_000526]                                                     | 3861  |



|              |      |      |      |      |       |                                                                         |       |
|--------------|------|------|------|------|-------|-------------------------------------------------------------------------|-------|
| A_23_P38537  | 1.1  | 1.3  | -4.1 | 1.0  | KRT16 | Homo sapiens keratin 16 (KRT16), mRNA [NM_005557]                       | 3868  |
| A_23_P96158  | 3.0  | 2.9  | 2.6  | 5.2  | KRT17 | Homo sapiens keratin 17 (KRT17), mRNA [NM_000422]                       | 3872  |
| A_23_P99320  | -1.2 | -3.3 | -1.3 | -1.1 | KRT18 | Homo sapiens keratin 18 (KRT18), transcript variant 1, mRNA [NM_000224] | 3875  |
| A_24_P924957 | 5.5  | 4.9  | 3.2  | 7.0  | KRT18 | Homo sapiens (clone XP6G6B) mRNA, partial EST. [L32537]                 | 3875  |
| A_23_P66798  | 1.6  | 1.5  | 2.7  | 1.5  | KRT19 | Homo sapiens keratin 19 (KRT19), mRNA [NM_002276]                       | 3880  |
| A_23_P66854  | 1.7  | 1.7  | 2.3  | 1.0  | KRT20 | Homo sapiens keratin 20 (KRT20), mRNA [NM_019010]                       | 54474 |

|              |      |      |      |      |        |                                                                                   |        |
|--------------|------|------|------|------|--------|-----------------------------------------------------------------------------------|--------|
| A_23_P78248  | 1.0  | -2.4 | 1.0  | 1.0  | KRT23  | Homo sapiens keratin 23 (histone deacetylase inducible) (KRT23), mRNA [NM_015515] | 25984  |
| A_23_P27186  | -2.5 | -1.0 | -1.1 | -2.0 | KRT26  | Homo sapiens keratin 26 (KRT26), mRNA [NM_181539]                                 | 353288 |
| A_32_P489662 | 3.0  | 3.2  | 2.0  | 1.8  | KRT28  | Homo sapiens keratin 28 (KRT28), mRNA [NM_181535]                                 | 162605 |
| A_23_P33573  | 1.8  | 1.7  | 1.4  | -2.0 | KRT3   | Homo sapiens keratin 3 (KRT3), mRNA [NM_057088]                                   | 3850   |
| A_23_P107465 | 1.2  | 6.1  | 1.4  | 1.8  | KRT31  | Homo sapiens keratin 31 (KRT31), mRNA [NM_002277]                                 | 3881   |
| A_23_P89665  | -1.0 | -2.1 | -1.5 | -2.6 | KRT33B | Homo sapiens keratin 33B (KRT33B), mRNA [NM_002279]                               | 3884   |

|              |       |      |      |      |       |                                                   |        |
|--------------|-------|------|------|------|-------|---------------------------------------------------|--------|
| A_23_P100991 | -19.8 | 1.4  | 1.4  | 1.0  | KRT38 | Homo sapiens keratin 38 (KRT38), mRNA [NM_006771] | 8687   |
| A_23_P100990 | -1.2  | 2.2  | 1.9  | 1.4  | KRT38 | Homo sapiens keratin 38 (KRT38), mRNA [NM_006771] | 8687   |
| A_24_P280333 | -1.9  | 1.1  | -5.5 | -1.3 | KRT40 | Homo sapiens keratin 40 (KRT40), mRNA [NM_182497] | 125115 |
| A_23_P218047 | 2.5   | -1.0 | -1.0 | -1.0 | KRT5  | Homo sapiens keratin 5 (KRT5), mRNA [NM_000424]   | 3852   |
| A_23_P366936 | -14.0 | -1.3 | -7.0 | -1.4 | KRT6C | Homo sapiens keratin 6C (KRT6C), mRNA [NM_173086] | 286887 |
| A_23_P99044  | -2.0  | -2.0 | -2.7 | -2.3 | KRT71 | Homo sapiens keratin 71 (KRT71), mRNA [NM_033448] | 112802 |

|              |      |      |      |      |       |                                                                         |        |
|--------------|------|------|------|------|-------|-------------------------------------------------------------------------|--------|
| A_23_P105453 | 3.7  | 3.6  | 3.3  | 3.4  | KRT73 | Homo sapiens keratin 73 (KRT73), mRNA [NM_175068]                       | 319101 |
| A_24_P927756 | 1.3  | 1.7  | -2.7 | 1.8  | KRT77 | Homo sapiens keratin 77 (KRT77), mRNA [NM_175078]                       | 374454 |
| A_24_P391625 | 1.1  | 1.1  | 1.2  | -6.4 | KRT79 | Homo sapiens keratin 79 (KRT79), mRNA [NM_175834]                       | 338785 |
| A_23_P14072  | -1.8 | -4.0 | -2.5 | -1.8 | KRT8  | Homo sapiens keratin 8 (KRT8), mRNA [NM_002273]                         | 3856   |
| A_24_P349264 | -1.8 | -1.2 | -2.0 | -2.0 | KRT80 | Homo sapiens keratin 80 (KRT80), transcript variant 1, mRNA [NM_182507] | 144501 |
| A_24_P410408 | 1.4  | -2.3 | -7.7 | 1.4  | KRT83 | Homo sapiens keratin 83 (KRT83), mRNA [NM_002282]                       | 3889   |

|              |      |      |      |      |          |                                                                            |        |
|--------------|------|------|------|------|----------|----------------------------------------------------------------------------|--------|
| A_23_P204144 | -1.8 | -2.9 | -1.7 | 1.4  | KRT85    | Homo sapiens keratin 85 (KRT85), mRNA [NM_002283]                          | 3891   |
| A_23_P363769 | 1.5  | 3.5  | -1.6 | 1.8  | KRT86    | Homo sapiens keratin 86 (KRT86), mRNA [NM_002284]                          | 3892   |
| A_24_P489690 | -1.0 | -1.0 | -2.7 | -1.2 | KRT8P41  | Homo sapiens keratin 8 pseudogene 41 (KRT8P41), non-coding RNA [NR_027713] | 283102 |
| A_24_P489695 | 4.1  | 1.6  | 3.1  | 1.7  | KRT8P41  | Homo sapiens keratin 8 pseudogene 41 (KRT8P41), non-coding RNA [NR_027713] | 283102 |
| A_24_P151005 | 1.7  | 1.7  | 3.0  | 1.0  | KRTAP1-1 | Homo sapiens keratin associated protein 1-1 (KRTAP1-1), mRNA [NM_030967]   | 81851  |

|              |      |      |      |      |           |                                                                                                                         |        |
|--------------|------|------|------|------|-----------|-------------------------------------------------------------------------------------------------------------------------|--------|
| A_32_P481377 | 1.9  | -1.8 | 1.6  | -2.2 | KRTAP11-1 | Homo sapiens keratin associated protein 11-1 (KRTAP11-1), mRNA [NM_175858]                                              | 337880 |
| A_24_P66312  | -1.9 | -1.3 | -1.8 | -2.8 | KRTAP12-1 | Homo sapiens keratin associated protein 12-1 (KRTAP12-1), mRNA [NM_181686]                                              | 353332 |
| A_24_P142495 | -2.8 | -1.0 | -2.3 | -1.1 | KRTAP1-3  | Homo sapiens keratin associated protein 1-3 (KRTAP1-3), mRNA [NM_030966]                                                | 81850  |
| A_24_P314534 | 2.6  | 2.5  | -1.2 | 1.5  | KRTAP13-2 | Homo sapiens keratin associated protein 13-2 (KRTAP13-2), nuclear gene encoding mitochondrial protein, mRNA [NM_181621] | 337959 |

|              |       |      |      |      |           |                                                                            |        |
|--------------|-------|------|------|------|-----------|----------------------------------------------------------------------------|--------|
| A_24_P246107 | 1.8   | 3.3  | 2.2  | 1.4  | KRTAP13-4 | Homo sapiens keratin associated protein 13-4 (KRTAP13-4), mRNA [NM_181600] | 284827 |
| A_23_P118842 | -15.2 | -1.7 | -1.9 | -1.8 | KRTAP1-5  | Homo sapiens keratin associated protein 1-5 (KRTAP1-5), mRNA [NM_031957]   | 83895  |
| A_24_P348845 | -1.2  | -1.2 | -2.0 | -3.1 | KRTAP15-1 | Homo sapiens keratin associated protein 15-1 (KRTAP15-1), mRNA [NM_181623] | 254950 |
| A_23_P66858  | -1.0  | -1.0 | -1.0 | -2.3 | KRTAP17-1 | Homo sapiens keratin associated protein 17-1 (KRTAP17-1), mRNA [NM_031964] | 83902  |

|              |      |      |      |      |           |                                                                                              |        |
|--------------|------|------|------|------|-----------|----------------------------------------------------------------------------------------------|--------|
| A_23_P143461 | -3.6 | 1.2  | -2.8 | -1.2 | KRTAP19-1 | keratin associated protein 19-1<br>[Source:HGNC Symbol;Accession:18936]<br>[ENST00000390689] | 337882 |
| A_24_P76854  | -1.2 | -1.7 | -3.9 | -1.0 | KRTAP2-1  | Homo sapiens keratin associated protein 2-1 (KRTAP2-1), mRNA<br>[NM_001123387]               | 81872  |
| A_23_P164405 | 2.3  | 1.6  | 1.6  | 1.0  | KRTAP2-4  | Homo sapiens keratin associated protein 2-4 (KRTAP2-4), mRNA<br>[NM_033184]                  | 85294  |
| A_23_P153022 | 3.1  | 1.3  | 1.5  | -1.1 | KRTAP2-4  | Homo sapiens keratin associated protein 2-4 (KRTAP2-4), mRNA<br>[NM_033184]                  | 85294  |



|              |      |      |      |      |          |                                                                          |       |
|--------------|------|------|------|------|----------|--------------------------------------------------------------------------|-------|
| A_24_P125977 | 6.5  | 5.1  | 1.0  | -2.9 | KRTAP2-4 | Homo sapiens keratin associated protein 2-4 (KRTAP2-4), mRNA [NM_033184] | 85294 |
| A_23_P101048 | -1.0 | -3.7 | -1.0 | -1.0 | KRTAP3-2 | Homo sapiens keratin associated protein 3-2 (KRTAP3-2), mRNA [NM_031959] | 83897 |
| A_23_P89649  | 1.0  | -1.1 | -1.1 | -2.8 | KRTAP3-3 | Homo sapiens keratin associated protein 3-3 (KRTAP3-3), mRNA [NM_033185] | 85293 |
| A_23_P10936  | -2.3 | -2.4 | -1.1 | 1.3  | KRTAP4-1 | Homo sapiens keratin associated protein 4-1 (KRTAP4-1), mRNA [NM_033060] | 85285 |

|              |      |      |      |      |           |                                                                            |           |
|--------------|------|------|------|------|-----------|----------------------------------------------------------------------------|-----------|
| A_23_P15798  | 4.3  | 3.2  | 1.2  | -1.2 | KRTAP4-12 | Homo sapiens keratin associated protein 4-12 (KRTAP4-12), mRNA [NM_031854] | 83755     |
| A_23_P66844  | 1.8  | 1.7  | 1.7  | -3.4 | KRTAP4-7  | Homo sapiens keratin associated protein 4-7 (KRTAP4-7), mRNA [NM_033061]   | 100132476 |
| A_24_P325146 | -3.4 | -1.8 | -1.3 | 1.0  | KRTAP4-8  | Homo sapiens keratin associated protein 4-8 (KRTAP4-8), mRNA [NM_031960]   | 728224    |
| A_23_P47086  | 1.0  | 3.4  | 1.3  | -1.1 | KRTAP5-8  | Homo sapiens keratin associated protein 5-8 (KRTAP5-8), mRNA [NM_021046]   | 57830     |

|              |      |      |      |      |          |                                                                          |        |
|--------------|------|------|------|------|----------|--------------------------------------------------------------------------|--------|
| A_23_P13048  | -4.4 | 1.2  | -1.7 | -2.0 | KRTAP5-9 | Homo sapiens keratin associated protein 5-9 (KRTAP5-9), mRNA [NM_005553] | 3846   |
| A_24_P391604 | 3.1  | 6.1  | 1.2  | 3.1  | KRTAP6-3 | Homo sapiens keratin associated protein 6-3 (KRTAP6-3), mRNA [NM_181605] | 337968 |
| A_23_P89646  | 1.1  | -2.6 | 1.1  | 1.0  | KRTAP9-2 | Homo sapiens keratin associated protein 9-2 (KRTAP9-2), mRNA [NM_031961] | 83899  |
| A_32_P66091  | -2.0 | -1.6 | -2.1 | -1.1 | KSR1     | Homo sapiens kinase suppressor of ras 1 (KSR1), mRNA [NM_014238]         | 8844   |
| A_24_P255483 | 1.1  | 1.0  | -4.8 | 1.8  | KSR1     | Homo sapiens kinase suppressor of ras 1 (KSR1), mRNA [NM_014238]         | 8844   |

|              |     |      |      |      |       |                                                                                                          |        |
|--------------|-----|------|------|------|-------|----------------------------------------------------------------------------------------------------------|--------|
| A_23_P103276 | 2.1 | 1.4  | -1.2 | 1.3  | KTI12 | Homo sapiens KTI12 homolog, chromatin associated (S. cerevisiae) (KTI12), mRNA [NM_138417]               | 112970 |
| A_23_P106131 | 5.1 | 4.6  | 2.4  | 2.8  | KTN1  | Homo sapiens kinectin 1 (kinesin receptor) (KTN1), transcript variant 4, mRNA [NM_004986]                | 3895   |
| A_24_P11506  | 1.0 | -5.0 | 1.0  | -1.0 | KYNU  | Homo sapiens kynureninase (KYNU), transcript variant 2, mRNA [NM_001032998]                              | 8942   |
| A_23_P137484 | 1.7 | 1.8  | 2.9  | 1.0  | L1TD1 | Homo sapiens LINE-1 type transposase domain containing 1 (L1TD1), transcript variant 2, mRNA [NM_019079] | 54596  |

|              |      |     |      |      |         |                                                                                                                         |       |
|--------------|------|-----|------|------|---------|-------------------------------------------------------------------------------------------------------------------------|-------|
| A_23_P106158 | -1.7 | 1.4 | -4.2 | 1.4  | L2HGDH  | Homo sapiens L-2-hydroxyglutarate dehydrogenase (L2HGDH), nuclear gene encoding mitochondrial protein, mRNA [NM_024884] | 79944 |
| A_23_P210445 | 1.1  | 1.1 | 1.1  | -2.5 | L3MBTL1 | Homo sapiens l(3)mbt-like 1 (Drosophila) (L3MBTL1), transcript variant II, mRNA [NM_032107]                             | 26013 |
| A_24_P6135   | 1.4  | 2.6 | -1.1 | 1.4  | L3MBTL2 | Homo sapiens l(3)mbt-like 2 (Drosophila) (L3MBTL2), mRNA [NM_031488]                                                    | 83746 |

|              |      |      |      |      |         |                                                                                                               |       |
|--------------|------|------|------|------|---------|---------------------------------------------------------------------------------------------------------------|-------|
| A_23_P80353  | -3.2 | -1.9 | -1.7 | -2.8 | L3MBTL2 | Homo sapiens<br>l(3)mbt-like 2<br>(Drosophila)<br>(L3MBTL2)<br>, mRNA<br>[NM_031488]                          | 83746 |
| A_32_P67533  | 1.1  | -2.4 | 1.1  | 1.1  | L3MBTL3 | Homo sapiens<br>l(3)mbt-like 3<br>(Drosophila)<br>(L3MBTL3)<br>, transcript variant 1,<br>mRNA<br>[NM_032438] | 84456 |
| A_23_P311885 | 1.0  | -2.1 | -1.0 | -1.1 | L3MBTL3 | Homo sapiens<br>l(3)mbt-like 3<br>(Drosophila)<br>(L3MBTL3)<br>, transcript variant 1,<br>mRNA<br>[NM_032438] | 84456 |

|              |      |      |      |      |         |                                                                                                               |       |
|--------------|------|------|------|------|---------|---------------------------------------------------------------------------------------------------------------|-------|
| A_23_P366426 | -3.6 | -3.5 | -4.0 | -4.0 | L3MBTL4 | Homo sapiens l(3)mbt-like 4 (Drosophila), mRNA (cDNA clone MGC:39812 IMAGE:5298402), complete cds. [BC039316] | 91133 |
| A_23_P116942 | -2.7 | 3.9  | -2.3 | -1.2 | LAG3    | Homo sapiens lymphocyte-activation gene 3 (LAG3), mRNA [NM_002286]                                            | 3902  |
| A_23_P73763  | 1.8  | 3.4  | 2.8  | 3.1  | LAGE3   | Homo sapiens L antigen family, member 3 (LAGE3), mRNA [NM_006014]                                             | 8270  |

|              |     |      |     |      |       |                                                                                                                  |        |
|--------------|-----|------|-----|------|-------|------------------------------------------------------------------------------------------------------------------|--------|
| A_23_P209135 | 1.2 | -4.8 | 1.1 | 1.6  | LAIR1 | Homo sapiens leukocyte-associated immunoglobulin-like receptor 1 (LAIR1), transcript variant a, mRNA [NM_002287] | 3903   |
| A_23_P209129 | 3.7 | 2.1  | 3.2 | 3.2  | LAIR2 | Homo sapiens leukocyte-associated immunoglobulin-like receptor 2 (LAIR2), transcript variant 1, mRNA [NM_002288] | 3904   |
| A_32_P313405 | 1.1 | -2.3 | 1.1 | -1.1 | LAMA1 | Homo sapiens laminin, alpha 1 (LAMA1), mRNA [NM_005559]                                                          | 284217 |
| A_24_P687302 | 1.1 | -2.1 | 1.1 | 1.1  | LAMA3 | Homo sapiens laminin, alpha 3 (LAMA3), transcript variant 1, mRNA [NM_198129]                                    | 3909   |



|              |      |     |       |      |       |                                                                                 |       |
|--------------|------|-----|-------|------|-------|---------------------------------------------------------------------------------|-------|
| A_23_P109269 | -3.3 | 1.3 | -3.1  | -1.1 | LAMA5 | Homo sapiens laminin, alpha 5 (LAMA5), mRNA [NM_005560]                         | 3911  |
| A_23_P86012  | 1.0  | 1.7 | -14.7 | -1.1 | LAMB3 | Homo sapiens laminin, beta 3 (LAMB3), transcript variant 2, mRNA [NM_001017402] | 3914  |
| A_23_P201636 | 1.7  | 1.7 | 2.4   | 1.0  | LAMC2 | Homo sapiens laminin, gamma 2 (LAMC2), transcript variant 1, mRNA [NM_005562]   | 3918  |
| A_23_P82979  | 2.6  | 2.5 | 1.8   | 2.4  | LAMC3 | Homo sapiens laminin, gamma 3 (LAMC3), mRNA [NM_006059]                         | 10319 |
| A_24_P304549 | 1.2  | 1.1 | 1.5   | -2.3 | LAMP1 | Homo sapiens lysosomal-associated membrane protein 1 (LAMP1), mRNA [NM_005561]  | 3916  |

|              |     |      |      |      |         |                                                                                                                          |       |
|--------------|-----|------|------|------|---------|--------------------------------------------------------------------------------------------------------------------------|-------|
| A_23_P2114   | 1.4 | -1.1 | -1.5 | 3.5  | LAMTOR1 | Homo sapiens late endosomal/lysosomal adaptor, MAPK and MTOR activator 1 (LAMTOR1), mRNA [NM_017907]                     | 55004 |
| A_24_P259922 | 1.1 | -2.1 | -1.1 | 1.3  | LANCL1  | Homo sapiens LanC lantibiotic synthetase component C-like 1 (bacterial) (LANCL1), transcript variant 1, mRNA [NM_006055] | 10314 |
| A_23_P82642  | 3.1 | 1.8  | 3.1  | -1.5 | LANCL2  | Homo sapiens LanC lantibiotic synthetase component C-like 2 (bacterial) (LANCL2), mRNA [NM_018697]                       | 55915 |

|              |      |      |      |      |         |                                                                                                            |        |
|--------------|------|------|------|------|---------|------------------------------------------------------------------------------------------------------------|--------|
| A_24_P180680 | 1.1  | 1.6  | 1.6  | 2.1  | LAPTM4B | Homo sapiens lysosomal protein transmembrane 4 beta (LAPTM4B), mRNA [NM_018407]                            | 55353  |
| A_23_P392383 | 1.2  | 3.0  | -1.3 | -9.3 | LARP1   | Homo sapiens La ribonucleo protein domain family, member 1 (LARP1), transcript variant 1, mRNA [NM_015315] | 23367  |
| A_24_P78526  | -2.2 | -1.0 | -2.0 | -1.1 | LARP4   | Homo sapiens La ribonucleo protein domain family, member 4 (LARP4), transcript variant 2, mRNA [NM_199188] | 113251 |

|              |      |      |      |      |       |                                                                                                            |        |
|--------------|------|------|------|------|-------|------------------------------------------------------------------------------------------------------------|--------|
| A_23_P36860  | -1.6 | -2.1 | -2.9 | -1.7 | LARP4 | Homo sapiens La ribonucleo protein domain family, member 4 (LARP4), transcript variant 2, mRNA [NM_199188] | 113251 |
| A_23_P84070  | 1.1  | -4.4 | -1.1 | 1.0  | LARP7 | Homo sapiens La ribonucleo protein domain family, member 7 (LARP7), transcript variant 1, mRNA [NM_016648] | 51574  |
| A_24_P51360  | 4.7  | 5.1  | 4.7  | 10.6 | LARS  | Homo sapiens leucyl-tRNA synthetase (LARS), mRNA [NM_020117]                                               | 51520  |
| A_23_P218965 | -8.1 | -1.8 | 1.7  | 1.1  | LARS  | Homo sapiens leucyl-tRNA synthetase (LARS), mRNA [NM_020117]                                               | 51520  |

|              |      |      |      |      |       |                                                                                                                             |       |
|--------------|------|------|------|------|-------|-----------------------------------------------------------------------------------------------------------------------------|-------|
| A_23_P212397 | 2.1  | 1.2  | 1.2  | 1.1  | LARS2 | Homo sapiens leucyl-tRNA synthetase 2, mitochondrial (LARS2), nuclear gene encoding mitochondrial protein, mRNA [NM_015340] | 23395 |
| A_23_P44112  | -1.3 | -1.3 | -1.5 | -2.5 | LAT   | Homo sapiens linker for activation of T cells (LAT), transcript variant 1, mRNA [NM_014387]                                 | 27040 |
| A_23_P60977  | 1.3  | 1.0  | -7.3 | -1.7 | LAT   | Homo sapiens linker for activation of T cells (LAT), transcript variant 1, mRNA [NM_014387]                                 | 27040 |

|              |      |     |      |      |       |                                                                                                               |       |
|--------------|------|-----|------|------|-------|---------------------------------------------------------------------------------------------------------------|-------|
| A_24_P940327 | -2.2 | 1.7 | 1.6  | 1.0  | LAT2  | linker for activation of T cells family, member 2 [Source:HGNC Symbol;Acc:12749] [ENST00000398475]            | 7462  |
| A_23_P259621 | -4.8 | 2.0 | 1.7  | -1.1 | LAT2  | Homo sapiens linker for activation of T cells family, member 2 (LAT2), transcript variant 1, mRNA [NM_032464] | 7462  |
| A_24_P70002  | -2.6 | 2.2 | -2.2 | 1.1  | LATS2 | Homo sapiens LATS, large tumor suppressor, homolog 2 (Drosophila) (LATS2), mRNA [NM_014572]                   | 26524 |

|              |      |      |      |      |      |                                                                                                |        |
|--------------|------|------|------|------|------|------------------------------------------------------------------------------------------------|--------|
| A_23_P438    | 1.0  | -2.5 | -1.1 | -1.1 | LAX1 | Homo sapiens lymphocyte transmembrane adaptor 1 (LAX1), transcript variant 1, mRNA [NM_017773] | 54900  |
| A_24_P205025 | 1.3  | 3.1  | 1.2  | -1.3 | LAYN | Homo sapiens cDNA FLJ39606 fis, clone SKNSH2006234. [AK096925]                                 | 143903 |
| A_24_P182858 | -1.3 | -1.9 | -1.8 | -2.2 | LBH  | Homo sapiens limb bud and heart development homolog (mouse) (LBH), mRNA [NM_030915]            | 81606  |
| A_23_P143178 | -2.2 | 1.2  | -3.3 | -4.4 | LBP  | Homo sapiens lipopolysaccharide binding protein (LBP), mRNA [NM_004139]                        | 3929   |

|              |      |      |      |      |       |                                                                          |        |
|--------------|------|------|------|------|-------|--------------------------------------------------------------------------|--------|
| A_23_P86489  | -3.6 | -1.3 | -1.5 | -2.9 | LBX1  | H.sapiens mRNA for transcription factor, Lbx1. [X90828]                  | 10660  |
| A_23_P79458  | 2.7  | 1.9  | 2.2  | 2.4  | LBX2  | Homo sapiens ladybird homeobox 2 (LBX2), mRNA [NM_001009812]             | 85474  |
| A_32_P48466  | 1.3  | 1.3  | -1.1 | -2.1 | LCA5L | Homo sapiens Leber congenital amaurosis 5-like (LCA5L), mRNA [NM_152505] | 150082 |
| A_23_P103315 | 2.2  | 1.1  | 1.2  | 3.4  | LCE1A | Homo sapiens late cornified envelope 1A (LCE1A), mRNA [NM_178348]        | 353131 |
| A_23_P404685 | 1.5  | 3.7  | 1.1  | 1.2  | LCE1A | Homo sapiens late cornified envelope 1A (LCE1A), mRNA [NM_178348]        | 353131 |



|              |      |       |      |      |       |                                                                   |        |
|--------------|------|-------|------|------|-------|-------------------------------------------------------------------|--------|
| A_23_P368862 | -1.0 | -15.5 | -1.0 | 1.0  | LCE1B | Homo sapiens late cornified envelope 1B (LCE1B), mRNA [NM_178349] | 353132 |
| A_23_P339691 | -1.2 | 1.0   | -2.4 | -1.0 | LCE1E | Homo sapiens late cornified envelope 1E (LCE1E), mRNA [NM_178353] | 353135 |
| A_23_P411321 | -2.4 | -1.0  | 1.4  | -2.7 | LCE1F | Homo sapiens late cornified envelope 1F (LCE1F), mRNA [NM_178354] | 353137 |
| A_23_P418006 | 2.7  | 1.6   | 3.1  | -1.1 | LCE2A | Homo sapiens late cornified envelope 2A (LCE2A), mRNA [NM_178428] | 353139 |

|              |      |     |      |      |       |                                                                   |        |
|--------------|------|-----|------|------|-------|-------------------------------------------------------------------|--------|
| A_24_P207828 | -2.7 | 1.3 | -3.7 | 2.6  | LCE2B | Homo sapiens late cornified envelope 2B (LCE2B), mRNA [NM_014357] | 26239  |
| A_23_P74920  | 1.4  | 2.4 | 1.2  | 8.7  | LCE2B | Homo sapiens late cornified envelope 2B (LCE2B), mRNA [NM_014357] | 26239  |
| A_23_P63521  | -1.1 | 5.0 | -2.7 | 1.1  | LCE2C | Homo sapiens late cornified envelope 2C (LCE2C), mRNA [NM_178429] | 353140 |
| A_23_P369471 | 1.7  | 2.1 | 1.0  | -1.0 | LCE3A | Homo sapiens late cornified envelope 3A (LCE3A), mRNA [NM_178431] | 353142 |

|              |      |      |      |       |       |                                                                   |        |
|--------------|------|------|------|-------|-------|-------------------------------------------------------------------|--------|
| A_23_P324538 | 1.7  | 1.6  | 1.7  | -16.7 | LCE3B | Homo sapiens late cornified envelope 3B (LCE3B), mRNA [NM_178433] | 353143 |
| A_23_P405295 | -1.1 | -2.2 | -1.3 | -1.1  | LCE3C | Homo sapiens late cornified envelope 3C (LCE3C), mRNA [NM_178434] | 353144 |
| A_23_P115519 | 3.4  | 3.1  | 2.0  | 3.8   | LCE3D | Homo sapiens late cornified envelope 3D (LCE3D), mRNA [NM_032563] | 84648  |
| A_23_P340338 | -1.3 | -9.2 | -1.7 | 1.4   | LCE3E | Homo sapiens late cornified envelope 3E (LCE3E), mRNA [NM_178435] | 353145 |

|              |      |      |      |      |       |                                                                   |        |
|--------------|------|------|------|------|-------|-------------------------------------------------------------------|--------|
| A_23_P310540 | 1.6  | 2.4  | 2.4  | -2.8 | LCE4A | Homo sapiens late cornified envelope 4A (LCE4A), mRNA [NM_178356] | 199834 |
| A_23_P304530 | 1.7  | 2.6  | -1.1 | 1.8  | LCE5A | Homo sapiens late cornified envelope 5A (LCE5A), mRNA [NM_178438] | 254910 |
| A_23_P32115  | -4.6 | -3.0 | -3.0 | -2.1 | LCN12 | Homo sapiens lipocalin 12 (LCN12), mRNA [NM_178536]               | 286256 |
| A_23_P71778  | 1.5  | 1.2  | -1.2 | -2.4 | LCN15 | Homo sapiens lipocalin 15 (LCN15), mRNA [NM_203347]               | 389812 |
| A_23_P169437 | 6.8  | 3.5  | 2.3  | 2.7  | LCN2  | Homo sapiens lipocalin 2 (LCN2), mRNA [NM_005564]                 | 3934   |

|              |      |      |      |      |       |                                                                                                                                                                     |        |
|--------------|------|------|------|------|-------|---------------------------------------------------------------------------------------------------------------------------------------------------------------------|--------|
| A_24_P365906 | -2.5 | -1.7 | 1.7  | -1.4 | LCN8  | lipocalin 8<br>[Source:H<br>GNC<br>Symbol;Ac<br>c:27038]<br>[ENST0000<br>0482893]                                                                                   | 138307 |
| A_23_P429670 | -1.6 | 2.8  | -1.2 | 2.1  | LCOR  | Homo<br>sapiens<br>ligand<br>dependen<br>t nuclear<br>receptor<br>corepress<br>or (LCOR),<br>transcript<br>variant 1,<br>mRNA<br>[NM_0324<br>40]                    | 84458  |
| A_32_P169679 | -2.1 | 1.0  | 1.0  | 1.2  | LCORL | Homo<br>sapiens<br>mRNA;<br>cDNA<br>DKFZp434<br>K087<br>(from<br>clone<br>DKFZp434<br>K087).<br>[AL133031<br>]                                                      | 254251 |
| A_23_P30547  | -3.3 | -1.6 | -1.8 | -1.8 | LCP2  | Homo<br>sapiens<br>lymphocyt<br>e cytosolic<br>protein 2<br>(SH2<br>domain<br>containing<br>leukocyte<br>protein of<br>76kDa)<br>(LCP2),<br>mRNA<br>[NM_0055<br>65] | 3937   |

|              |      |      |      |      |      |                                                                                     |      |
|--------------|------|------|------|------|------|-------------------------------------------------------------------------------------|------|
| A_23_P79217  | -1.0 | 1.3  | -2.7 | -1.0 | LCT  | Homo sapiens lactase (LCT), mRNA [NM_002299]                                        | 3938 |
| A_23_P47565  | -6.9 | -1.1 | -1.2 | -1.1 | LDHA | Homo sapiens lactate dehydrogenase A (LDHA), transcript variant 1, mRNA [NM_005566] | 3939 |
| A_32_P231391 | 1.8  | -1.2 | -1.0 | -2.0 | LDHA | Homo sapiens lactate dehydrogenase A (LDHA), transcript variant 1, mRNA [NM_005566] | 3939 |
| A_23_P53476  | 1.9  | 2.2  | 1.8  | 1.0  | LDHB | Homo sapiens lactate dehydrogenase B (LDHB), transcript variant 1, mRNA [NM_002300] | 3945 |

|              |      |      |      |      |         |                                                                                                                           |        |
|--------------|------|------|------|------|---------|---------------------------------------------------------------------------------------------------------------------------|--------|
| A_24_P913489 | 2.7  | 1.0  | 2.0  | -1.2 | LDLR    | Homo sapiens low density lipoprotein receptor (FH 10 mutant causing familial hypercholesterolemia) mRNA, 3' end. [M28219] | 3949   |
| A_24_P491397 | -3.6 | -1.0 | -1.1 | -1.6 | LDLRAD1 | Homo sapiens low density lipoprotein receptor class A domain containing 1 (LDLRAD1), mRNA [NM_001010978]                  | 388633 |
| A_23_P25587  | 1.6  | 1.0  | -1.0 | -3.9 | LECT1   | Homo sapiens leukocyte cell derived chemotaxin 1 (LECT1), transcript variant 1, mRNA [NM_007015]                          | 11061  |

|              |      |      |      |      |       |                                                                                                |        |
|--------------|------|------|------|------|-------|------------------------------------------------------------------------------------------------|--------|
| A_24_P20630  | -1.3 | 1.1  | -2.0 | -1.1 | LEF1  | Homo sapiens lymphoid enhancer-binding factor 1 (LEF1), transcript variant 1, mRNA [NM_016269] | 51176  |
| A_24_P305960 | 1.0  | -2.1 | -1.4 | -2.2 | LEMD2 | Homo sapiens LEM domain containing 2 (LEMD2), transcript variant 1, mRNA [NM_181336]           | 221496 |
| A_23_P208523 | -5.5 | 1.4  | 1.7  | 1.3  | LENG1 | Homo sapiens leukocyte receptor cluster (LRC) member 1 (LENG1), mRNA [NM_024316]               | 79165  |
| A_23_P56288  | 2.1  | 1.1  | -1.3 | 3.8  | LENG8 | Homo sapiens leukocyte receptor cluster (LRC) member 8 (LENG8), mRNA [NM_052925]               | 114823 |



|              |      |      |      |      |       |                                                                                                               |        |
|--------------|------|------|------|------|-------|---------------------------------------------------------------------------------------------------------------|--------|
| A_32_P493225 | -2.9 | 1.5  | -2.1 | -6.9 | LENG9 | Homo sapiens leukocyte receptor cluster (LRC) member 9 (LENG9), mRNA [NM_198988]                              | 94059  |
| A_23_P314222 | 1.1  | 1.5  | -1.4 | 3.8  | LEO1  | Homo sapiens Leo1, Paf1/RNA polymerase II complex component, homolog (S. cerevisiae) (LEO1), mRNA [NM_138792] | 123169 |
| A_23_P161135 | 2.0  | -1.6 | 1.7  | -2.1 | LEPR  | Homo sapiens leptin receptor (LEPR), transcript variant 1, mRNA [NM_002303]                                   | 3953   |

|              |      |      |      |      |         |                                                                                                                  |       |
|--------------|------|------|------|------|---------|------------------------------------------------------------------------------------------------------------------|-------|
| A_23_P63038  | -1.5 | -2.3 | -2.7 | -2.4 | LEPRE1  | Homo sapiens leucine proline-enriched proteoglycan (leprecan) 1 (LEPRE1), transcript variant 1, mRNA [NM_022356] | 64175 |
| A_23_P87752  | -1.7 | -1.5 | -2.0 | -2.3 | LEPREL2 | Homo sapiens leprecan-like 2 (LEPREL2), mRNA [NM_014262]                                                         | 10536 |
| A_24_P148094 | 1.0  | 1.0  | 3.9  | -1.0 | LEPROT  | Homo sapiens leptin receptor overlapping transcript (LEPROT), transcript variant 1, mRNA [NM_017526]             | 54741 |

|             |      |      |      |      |        |                                                                                                                                               |       |
|-------------|------|------|------|------|--------|-----------------------------------------------------------------------------------------------------------------------------------------------|-------|
| A_23_P1126  | 6.0  | 2.4  | 9.0  | 11.4 | LEPROT | Homo sapiens leptin receptor overlapping transcript (LEPROT), transcript variant 1, mRNA [NM_017526]                                          | 54741 |
| A_23_P94998 | 2.4  | 2.8  | 2.0  | 1.4  | LETM1  | Homo sapiens leucine zipper-EF-hand containing transmembrane protein 1 (LETM1), nuclear gene encoding mitochondrial protein, mRNA [NM_012318] | 3954  |
| A_23_P8452  | -1.2 | -5.6 | -3.3 | 1.1  | LFNG   | Homo sapiens LFNG O-fucosylpeptide 3-beta-N-acetylglucosaminyltransferase (LFNG), transcript variant 1, mRNA [NM_001040167]                   | 3955  |

|              |      |      |       |      |         |                                                                                                          |        |
|--------------|------|------|-------|------|---------|----------------------------------------------------------------------------------------------------------|--------|
| A_23_P139198 | -2.1 | -2.1 | -1.3  | -2.1 | LGALS12 | Homo sapiens lectin, galactosid e-binding, soluble, 12 (LGALS12), transcript variant 2, mRNA [NM_033101] | 85329  |
| A_23_P5031   | 2.8  | 2.8  | 2.7   | 2.9  | LGALS13 | Homo sapiens lectin, galactosid e-binding, soluble, 13 (LGALS13), mRNA [NM_013268]                       | 29124  |
| A_23_P254917 | -1.1 | -1.8 | -23.7 | 1.2  | LGALS4  | Homo sapiens lectin, galactosid e-binding, soluble, 4 (LGALS4), mRNA [NM_006149]                         | 3960   |
| A_23_P108062 | -2.3 | 1.2  | 1.1   | -1.3 | LGALS7B | Homo sapiens lectin, galactosid e-binding, soluble, 7B (LGALS7B), mRNA [NM_001042507]                    | 653499 |

|              |      |      |      |      |            |                                                                                                   |           |
|--------------|------|------|------|------|------------|---------------------------------------------------------------------------------------------------|-----------|
| A_23_P345445 | -4.0 | -1.6 | -3.1 | 1.1  | LGALS8-AS1 | Homo sapiens LGALS8 antisense RNA 1 (non-protein coding) (LGALS8-AS1), non-coding RNA [NR_034040] | 100287902 |
| A_23_P430818 | 1.1  | -1.1 | -2.1 | -1.8 | LGALSL     | Homo sapiens lectin, galactoside-binding-like (LGALSL), mRNA [NM_014181]                          | 29094     |
| A_23_P127267 | 2.7  | 2.7  | 2.7  | 2.8  | LGI1       | Homo sapiens leucine-rich, glioma inactivated 1 (LGI1), mRNA [NM_005097]                          | 9211      |
| A_24_P310256 | 2.5  | -1.9 | 1.1  | 1.9  | LGI4       | Homo sapiens leucine-rich repeat LGI family, member 4 (LGI4), mRNA [NM_139284]                    | 163175    |

|             |     |      |       |     |      |                                                                                                   |       |
|-------------|-----|------|-------|-----|------|---------------------------------------------------------------------------------------------------|-------|
| A_32_P17765 | 1.1 | -4.5 | 1.2   | 2.0 | LGR4 | Homo sapiens leucine-rich repeat containing G protein-coupled receptor 4 (LGR4), mRNA [NM_018490] | 55366 |
| A_24_P90216 | 5.5 | 5.2  | 4.8   | 5.2 | LGR4 | Homo sapiens leucine-rich repeat containing G protein-coupled receptor 4 (LGR4), mRNA [NM_018490] | 55366 |
| A_23_P98974 | 2.0 | 1.9  | -13.8 | 1.6 | LGR5 | Homo sapiens leucine-rich repeat containing G protein-coupled receptor 5 (LGR5), mRNA [NM_003667] | 8549  |

|              |      |      |      |      |        |                                                                                                                            |        |
|--------------|------|------|------|------|--------|----------------------------------------------------------------------------------------------------------------------------|--------|
| A_23_P23839  | 4.3  | 4.2  | 4.4  | 3.4  | LGR6   | Homo sapiens leucine-rich repeat containing G protein-coupled receptor 6 (LGR6), transcript variant 1, mRNA [NM_001017403] | 59352  |
| A_23_P218505 | 3.5  | 1.4  | 1.2  | 3.6  | LHB    | Homo sapiens luteinizing hormone beta polypeptide (LHB), mRNA [NM_000894]                                                  | 3972   |
| A_23_P102286 | 2.3  | 2.1  | 2.3  | 2.0  | LHCGR  | Homo sapiens luteinizing hormone/choriogonadotropin receptor (LHCGR), mRNA [NM_000233]                                     | 3973   |
| A_23_P327499 | -1.3 | -1.2 | -1.4 | -2.3 | LHFPL1 | Homo sapiens lipoma HMGIC fusion partner-like 1 (LHFPL1), mRNA [NM_178175]                                                 | 340596 |

|              |      |      |      |       |        |                                                                                                                        |       |
|--------------|------|------|------|-------|--------|------------------------------------------------------------------------------------------------------------------------|-------|
| A_23_P255104 | -1.4 | -1.0 | -1.0 | -5.2  | LHFPL2 | Homo sapiens lipoma HMGIC fusion partner-like 2 (LHFPL2), mRNA [NM_005779]                                             | 10184 |
| A_23_P75299  | -3.0 | 1.6  | -1.0 | -21.6 | LHPP   | Homo sapiens phosphotyrosine phosphohistidine inorganic pyrophosphatase (LHPP), transcript variant 1, mRNA [NM_022126] | 64077 |
| A_24_P355493 | 1.2  | -2.4 | -1.1 | -1.0  | LHPP   | Homo sapiens phosphotyrosine phosphohistidine inorganic pyrophosphatase (LHPP), transcript variant 1, mRNA [NM_022126] | 64077 |



|              |      |      |      |      |      |                                                                            |       |
|--------------|------|------|------|------|------|----------------------------------------------------------------------------|-------|
| A_23_P47967  | 4.1  | 2.6  | 2.4  | 3.0  | LHX5 | Homo sapiens LIM homeobox 5 (LHX5), mRNA [NM_022363]                       | 64211 |
| A_23_P32177  | 4.8  | 4.7  | 4.4  | 4.5  | LHX6 | Homo sapiens LIM homeobox 6 (LHX6), transcript variant 1, mRNA [NM_014368] | 26468 |
| A_23_P32175  | 1.0  | 1.0  | -2.0 | -1.0 | LHX6 | Homo sapiens LIM homeobox 6 (LHX6), transcript variant 1, mRNA [NM_014368] | 26468 |
| A_23_P327562 | -1.6 | -1.0 | -1.2 | -3.5 | LHX9 | Homo sapiens LIM homeobox 9 (LHX9), transcript variant 1, mRNA [NM_020204] | 56956 |

|              |      |      |      |      |      |                                                                                                       |      |
|--------------|------|------|------|------|------|-------------------------------------------------------------------------------------------------------|------|
| A_24_P122137 | 6.2  | 4.6  | 1.9  | 3.1  | LIF  | Homo sapiens leukemia inhibitory factor (cholinergic differentiation factor) (LIF), mRNA [NM_002309]  | 3976 |
| A_24_P233488 | 1.1  | -1.7 | -3.0 | -2.2 | LIF  | Homo sapiens leukemia inhibitory factor (cholinergic differentiation factor) (LIF), mRNA [NM_002309]  | 3976 |
| A_23_P133517 | -4.0 | 4.0  | 1.1  | 1.1  | LIFR | Homo sapiens leukemia inhibitory factor receptor alpha (LIFR), transcript variant 2, mRNA [NM_002310] | 3977 |

|              |      |      |      |      |      |                                                                                                       |      |
|--------------|------|------|------|------|------|-------------------------------------------------------------------------------------------------------|------|
| A_24_P325992 | 2.8  | 4.4  | 4.4  | 2.6  | LIFR | Homo sapiens leukemia inhibitory factor receptor alpha (LIFR), transcript variant 2, mRNA [NM_002310] | 3977 |
| A_24_P397386 | -1.0 | -1.1 | -2.5 | -1.1 | LIFR | Homo sapiens leukemia inhibitory factor receptor alpha (LIFR), transcript variant 2, mRNA [NM_002310] | 3977 |
| A_23_P39116  | 2.0  | 1.1  | 1.9  | 1.1  | LIG1 | Homo sapiens ligase I, DNA, ATP-dependent (LIG1), mRNA [NM_000234]                                    | 3978 |

|              |      |      |      |      |        |                                                                                                                                            |       |
|--------------|------|------|------|------|--------|--------------------------------------------------------------------------------------------------------------------------------------------|-------|
| A_23_P501134 | -1.6 | -1.2 | -2.4 | 1.4  | LIG3   | Homo sapiens ligase III, DNA, ATP-dependent (LIG3), nuclear gene encoding mitochondrial protein, transcript variant beta, mRNA [NM_002311] | 3980  |
| A_23_P25581  | 1.1  | -1.0 | -3.3 | -1.1 | LIG4   | Homo sapiens ligase IV, DNA, ATP-dependent (LIG4), transcript variant 1, mRNA [NM_002312]                                                  | 3981  |
| A_24_P393151 | 2.3  | 1.9  | 4.8  | -1.4 | LILRA1 | Homo sapiens leucocyte immunoglobulin-like receptor-6b (LIR-6) mRNA, complete cds. [AF025529]                                              | 11024 |

|              |      |      |      |      |        |                                                                                                                                                 |       |
|--------------|------|------|------|------|--------|-------------------------------------------------------------------------------------------------------------------------------------------------|-------|
| A_23_P142205 | 1.1  | 1.1  | 4.9  | 1.9  | LILRA2 | Homo sapiens leukocyte immunoglobulin-like receptor, subfamily A (with TM domain), member 2 (LILRA2), transcript variant 2, mRNA [NM_006866]    | 11027 |
| A_23_P79094  | -1.1 | -2.2 | -1.4 | -1.6 | LILRA3 | Homo sapiens leukocyte immunoglobulin-like receptor, subfamily A (without TM domain), member 3 (LILRA3), transcript variant 1, mRNA [NM_006865] | 11026 |

|              |      |      |      |      |        |                                                                                                                                              |        |
|--------------|------|------|------|------|--------|----------------------------------------------------------------------------------------------------------------------------------------------|--------|
| A_23_P90497  | -4.4 | -1.5 | -5.6 | -2.4 | LILRA4 | Homo sapiens leukocyte immunoglobulin-like receptor, subfamily A (with TM domain), member 4 (LILRA4), mRNA [NM_012276]                       | 23547  |
| A_23_P107847 | -9.3 | 1.6  | -1.8 | 1.6  | LILRA5 | Homo sapiens leukocyte immunoglobulin-like receptor, subfamily A (with TM domain), member 5 (LILRA5), transcript variant 2, mRNA [NM_181985] | 353514 |

|              |      |      |      |      |        |                                                                                                                                                        |       |
|--------------|------|------|------|------|--------|--------------------------------------------------------------------------------------------------------------------------------------------------------|-------|
| A_23_P343221 | 1.6  | 9.0  | 4.8  | 6.8  | LILRB1 | Homo sapiens leukocyte immunoglobulin-like receptor, subfamily B (with TM and ITIM domains), member 1 (LILRB1), transcript variant 1, mRNA [NM_006669] | 10859 |
| A_23_P208493 | -1.0 | -1.0 | -1.0 | -2.8 | LILRB2 | Homo sapiens leukocyte immunoglobulin-like receptor, subfamily B (with TM and ITIM domains), member 2 (LILRB2), transcript variant 1, mRNA [NM_005874] | 10288 |

|              |      |      |      |      |        |                                                                                                                                                        |       |
|--------------|------|------|------|------|--------|--------------------------------------------------------------------------------------------------------------------------------------------------------|-------|
| A_23_P164784 | -1.9 | -1.6 | -2.5 | -1.0 | LILRB5 | Homo sapiens leukocyte immunoglobulin-like receptor, subfamily B (with TM and ITIM domains), member 5 (LILRB5), transcript variant 2, mRNA [NM_006840] | 10990 |
| A_23_P27781  | 1.5  | 1.4  | -7.9 | -1.3 | LILRP2 | Homo sapiens leukocyte immunoglobulin-like receptor pseudogene 2 (LILRP2), non-coding RNA [NR_003061]                                                  | 79166 |
| A_24_P159635 | 5.9  | 6.7  | 6.7  | 4.3  | LIMD2  | Homo sapiens LIM domain containing 2 (LIMD2), mRNA [NM_030576]                                                                                         | 80774 |



|              |      |      |      |      |       |                                                                                     |       |
|--------------|------|------|------|------|-------|-------------------------------------------------------------------------------------|-------|
| A_24_P168232 | 2.2  | 1.2  | -1.2 | -4.4 | LIMD2 | Homo sapiens LIM domain containing 2 (LIMD2), mRNA [NM_030576]                      | 80774 |
| A_23_P376088 | 6.3  | 7.9  | 2.0  | 4.4  | LIME1 | Homo sapiens Lck interacting transmembrane adaptor 1 (LIME1), mRNA [NM_017806]      | 54923 |
| A_23_P211445 | -1.0 | -2.2 | -1.1 | -1.1 | LIMK2 | Homo sapiens LIM domain kinase 2 (LIMK2), transcript variant 2b, mRNA [NM_016733]   | 3985  |
| A_24_P353300 | 2.3  | 3.5  | 1.5  | 1.7  | LIMK2 | Homo sapiens LIM domain kinase 2 (LIMK2), transcript variant 1, mRNA [NM_001031801] | 3985  |

|              |     |      |      |      |             |                                                                                                            |           |
|--------------|-----|------|------|------|-------------|------------------------------------------------------------------------------------------------------------|-----------|
| A_23_P142796 | 1.6 | 1.6  | -2.4 | 1.1  | LIMS2       | Homo sapiens LIM and senescent cell antigen-like domains 2 (LIMS2), transcript variant 2, mRNA [NM_017980] | 55679     |
| A_24_P527716 | 1.0 | 1.7  | 1.5  | 3.2  | LIMS3-LOC44 | Homo sapiens LIMS3-LOC44089 5 readthrough (LIMS3-LOC44089 5), non-coding RNA [NR_027145]                   | 100271835 |
| A_24_P769529 | 1.0 | -1.0 | -2.0 | -1.1 | LIN28B      | Homo sapiens lin-28 homolog B (C. elegans) (LIN28B), mRNA [NM_001004317]                                   | 389421    |
| A_23_P165186 | 3.4 | 8.7  | 1.1  | 1.2  | LIN37       | Homo sapiens lin-37 homolog (C. elegans) (LIN37), mRNA [NM_019104]                                         | 55957     |

|              |      |     |      |      |        |                                                                                           |        |
|--------------|------|-----|------|------|--------|-------------------------------------------------------------------------------------------|--------|
| A_24_P867201 | -4.4 | 1.1 | 1.0  | 1.0  | LIN7A  | lin-7 homolog A (C. elegans) [Source:HGNC Symbol;Accession:17787] [ENST00000552864]       | 8825   |
| A_23_P164912 | -1.1 | 1.3 | -1.2 | -7.5 | LIN7B  | Homo sapiens lin-7 homolog B (C. elegans) (LIN7B), mRNA [NM_022165]                       | 64130  |
| A_23_P206092 | 1.0  | 3.1 | -2.5 | 1.9  | LINGO1 | Homo sapiens leucine rich repeat and Ig domain containing 1 (LINGO1), mRNA [NM_032808]    | 84894  |
| A_24_P247626 | -1.0 | 2.1 | -1.1 | 1.7  | LINGO4 | Homo sapiens leucine rich repeat and Ig domain containing 4 (LINGO4), mRNA [NM_001004432] | 339398 |

|              |      |      |      |       |      |                                                                                                            |       |
|--------------|------|------|------|-------|------|------------------------------------------------------------------------------------------------------------|-------|
| A_23_P205944 | 1.9  | -1.1 | 1.0  | -3.6  | LINS | Homo sapiens lines homolog (Drosophila) (LINS), transcript variant 6, mRNA [NM_001040616]                  | 55180 |
| A_24_P198629 | -1.0 | -1.0 | -1.1 | -4.4  | LINS | Homo sapiens lines homolog (Drosophila) (LINS), transcript variant 6, mRNA [NM_001040616]                  | 55180 |
| A_23_P97860  | 1.0  | -1.4 | -2.0 | -1.9  | LIPA | Homo sapiens lipase A, lysosomal acid, cholesterol esterase (LIPA), transcript variant 2, mRNA [NM_000235] | 3988  |
| A_23_P38876  | -1.7 | -2.9 | -3.1 | -18.3 | LIPE | Homo sapiens lipase, hormone-sensitive (LIPE), mRNA [NM_005357]                                            | 3991  |

|              |      |      |      |      |       |                                                                                                         |        |
|--------------|------|------|------|------|-------|---------------------------------------------------------------------------------------------------------|--------|
| A_24_P125469 | 1.1  | 5.8  | -2.9 | 1.0  | LIPG  | Homo sapiens lipase, endothelial (LIPG), mRNA [NM_006033]                                               | 9388   |
| A_24_P799858 | 1.0  | -1.4 | -2.8 | -1.5 | LIPH  | lipase, member H [Source:HGNC Symbol;Acc:18483] [ENST00000296252]                                       | 200879 |
| A_23_P129738 | -1.8 | 2.1  | 1.2  | -1.1 | LLGL2 | Homo sapiens lethal giant larvae homolog 2 (Drosophila) (LLGL2), transcript variant 1, mRNA [NM_004524] | 3993   |
| A_23_P25097  | -4.8 | -1.2 | -3.1 | -1.3 | LLPH  | Homo sapiens LLP homolog, long-term synaptic facilitation (Aplysia) (LLPH), mRNA [NM_032338]            | 84298  |

|              |      |      |      |      |        |                                                                      |       |
|--------------|------|------|------|------|--------|----------------------------------------------------------------------|-------|
| A_24_P316127 | 2.2  | -1.7 | -3.5 | -6.3 | LLPH   | Homo sapiens DC30 mRNA, complete cds. [AF255792]                     | 84298 |
| A_23_P215214 | 2.0  | 2.0  | 2.0  | 1.0  | LMBR1  | Homo sapiens limb region 1 homolog (mouse) (LMBR1), mRNA [NM_022458] | 64327 |
| A_23_P327698 | 1.0  | 1.0  | -1.0 | -2.7 | LMBRD2 | Homo sapiens LMBR1 domain containing 2 (LMBRD2), mRNA [NM_001007527] | 92255 |
| A_32_P105406 | -1.0 | -2.5 | -2.2 | 1.0  | LMBRD2 | Homo sapiens LMBR1 domain containing 2 (LMBRD2), mRNA [NM_001007527] | 92255 |

|              |      |      |      |      |      |                                                                                                       |       |
|--------------|------|------|------|------|------|-------------------------------------------------------------------------------------------------------|-------|
| A_23_P88947  | -2.3 | -2.5 | -5.9 | -2.6 | LMF1 | Homo sapiens lipase maturation factor 1 (LMF1), transcript variant 1, mRNA [NM_022773]                | 64788 |
| A_24_P18917  | -2.1 | 1.3  | -2.1 | 1.2  | LMF1 | Homo sapiens lipase maturation factor 1 (LMF1), transcript variant 1, mRNA [NM_022773]                | 64788 |
| A_24_P367812 | 1.4  | -2.4 | -3.4 | -1.0 | LMF1 | Homo sapiens hypothetical protein LOC650392, mRNA (cDNA clone IMAGE:5242623), partial cds. [BC028099] | 64788 |
| A_32_P527232 | -1.1 | 1.2  | -1.5 | -2.2 | LMF2 | Homo sapiens lipase maturation factor 2 (LMF2), mRNA [NM_033200]                                      | 91289 |

|              |      |      |      |      |       |                                                                          |        |
|--------------|------|------|------|------|-------|--------------------------------------------------------------------------|--------|
| A_23_P34835  | 1.1  | -3.4 | -1.3 | -1.3 | LMNA  | Homo sapiens lamin A/C (LMNA), transcript variant 2, mRNA [NM_005572]    | 4000   |
| A_23_P205159 | 2.0  | 2.0  | 2.8  | 1.6  | LMO7  | Homo sapiens LIM domain 7 (LMO7), transcript variant 1, mRNA [NM_005358] | 4008   |
| A_23_P201940 | 1.6  | 2.1  | -1.2 | -2.3 | LMOD1 | Homo sapiens leiomodlin 1 (smooth muscle) (LMOD1), mRNA [NM_012134]      | 25802  |
| A_24_P249253 | 1.4  | 1.4  | 1.3  | 2.1  | LMOD2 | Homo sapiens leiomodlin 2 (cardiac) (LMOD2), mRNA [NM_207163]            | 442721 |
| A_24_P76821  | 16.0 | 12.6 | 12.3 | 13.4 | LMOD3 | Homo sapiens leiomodlin 3 (fetal) (LMOD3), mRNA [NM_198271]              | 56203  |



|              |      |      |      |      |          |                                                                                                         |        |
|--------------|------|------|------|------|----------|---------------------------------------------------------------------------------------------------------|--------|
| A_23_P340271 | -1.1 | 3.4  | -1.5 | -2.5 | LMX1A    | Homo sapiens LIM homeobox transcription factor 1, alpha (LMX1A), transcript variant 1, mRNA [NM_177398] | 4009   |
| A_24_P141227 | -2.4 | -1.5 | -1.8 | -1.1 | LMX1B    | Homo sapiens LIM homeobox transcription factor 1, beta (LMX1B), transcript variant 1, mRNA [NM_002316]  | 4010   |
| A_23_P257593 | 12.0 | 11.7 | 11.3 | 11.0 | LOH12CR1 | Homo sapiens loss of heterozygosity, 12, chromosomal region 1 (LOH12CR1), mRNA [NM_058169]              | 118426 |

|              |      |      |       |      |        |                                                                                                                    |       |
|--------------|------|------|-------|------|--------|--------------------------------------------------------------------------------------------------------------------|-------|
| A_24_P406480 | -2.0 | 1.0  | -2.3  | 1.7  | LONRF1 | Homo sapiens LON peptidase N-terminal domain and ring finger 1 (LONRF1), mRNA [NM_152271]                          | 91694 |
| A_32_P194032 | -1.0 | -1.1 | -27.3 | -1.1 | LONRF1 | Homo sapiens LON peptidase N-terminal domain and ring finger 1 (LONRF1), mRNA [NM_152271]                          | 91694 |
| A_24_P185909 | 2.1  | 2.2  | -1.5  | 1.9  | LONRF3 | Homo sapiens LON peptidase N-terminal domain and ring finger 3 (LONRF3), transcript variant 1, mRNA [NM_001031855] | 79836 |

|              |      |      |      |      |        |                                                                                                                    |        |
|--------------|------|------|------|------|--------|--------------------------------------------------------------------------------------------------------------------|--------|
| A_23_P114414 | 6.1  | 1.5  | 2.5  | 4.8  | LONRF3 | Homo sapiens LON peptidase N-terminal domain and ring finger 3 (LONRF3), transcript variant 1, mRNA [NM_001031855] | 79836  |
| A_24_P196216 | 1.7  | -1.1 | -2.5 | 1.1  | LOXHD1 | Homo sapiens lipoxygenase homology domains 1 (LOXHD1), transcript variant 1, mRNA [NM_144612]                      | 125336 |
| A_24_P88763  | -1.0 | -2.4 | -1.1 | -1.1 | LOXL3  | Homo sapiens lysyl oxidase-like 3 (LOXL3), mRNA [NM_032603]                                                        | 84695  |
| A_23_P12755  | -2.4 | -3.6 | -2.2 | -2.3 | LOXL4  | Homo sapiens lysyl oxidase-like 4 (LOXL4), mRNA [NM_032211]                                                        | 84171  |

|              |      |      |      |      |        |                                                                                               |       |
|--------------|------|------|------|------|--------|-----------------------------------------------------------------------------------------------|-------|
| A_24_P41801  | -1.1 | -3.4 | -3.1 | -3.3 | LPA    | Homo sapiens lipoprotein, Lp(a) (LPA), mRNA [NM_005577]                                       | 4018  |
| A_23_P502879 | 1.1  | 1.1  | -2.1 | 1.0  | LPAR1  | Homo sapiens lysophosphatidic acid receptor 1 (LPAR1), transcript variant 2, mRNA [NM_057159] | 1902  |
| A_23_P2705   | -2.6 | 1.0  | -4.6 | -2.6 | LPAR6  | Homo sapiens lysophosphatidic acid receptor 6 (LPAR6), transcript variant 1, mRNA [NM_005767] | 10161 |
| A_23_P213471 | -4.6 | -1.8 | -1.3 | -1.7 | LPCAT1 | Homo sapiens lysophosphatidylcholine acyltransferase 1 (LPCAT1), mRNA [NM_024830]             | 79888 |

|              |      |      |      |      |       |                                                                               |       |
|--------------|------|------|------|------|-------|-------------------------------------------------------------------------------|-------|
| A_23_P391926 | 1.0  | -1.7 | -1.2 | -3.2 | LPHN1 | Homo sapiens latrophilin 1 (LPHN1), transcript variant 1, mRNA [NM_001008701] | 22859 |
| A_23_P74042  | 1.5  | 1.8  | 1.9  | 4.0  | LPHN2 | Homo sapiens latrophilin 2 (LPHN2), mRNA [NM_012302]                          | 23266 |
| A_32_P52609  | 2.9  | 2.9  | 2.8  | 2.0  | LPIN1 | Homo sapiens lipin 1 (LPIN1), mRNA [NM_145693]                                | 23175 |
| A_24_P301557 | -2.2 | -2.9 | -1.2 | -1.3 | LPIN2 | Homo sapiens lipin 2 (LPIN2), mRNA [NM_014646]                                | 9663  |
| A_23_P208055 | 2.1  | 2.4  | -2.3 | 2.2  | LPIN2 | Homo sapiens lipin 2 (LPIN2), mRNA [NM_014646]                                | 9663  |
| A_24_P100695 | 1.1  | -1.4 | 1.1  | -3.4 | LPIN3 | Homo sapiens lipin 3 (LPIN3), mRNA [NM_022896]                                | 64900 |

|              |      |     |      |      |       |                                                                                                                 |       |
|--------------|------|-----|------|------|-------|-----------------------------------------------------------------------------------------------------------------|-------|
| A_24_P916515 | 1.9  | 1.8 | 1.8  | 2.1  | LPP   | LIM domain containing preferred translocation partner in lipoma [Source:HGNC Symbol;Acc:6679] [ENST00000483938] | 4026  |
| A_23_P259707 | -6.4 | 1.1 | 1.1  | 1.1  | LPPR1 | Homo sapiens lipid phosphate phosphatase-related protein type 1 (LPPR1), transcript variant 1, mRNA [NM_207299] | 54886 |
| A_24_P151213 | 7.3  | 2.1 | -3.1 | -1.3 | LPPR2 | Homo sapiens lipid phosphate phosphatase-related protein type 2 (LPPR2), transcript variant 1, mRNA [NM_022737] | 64748 |

|              |      |      |      |      |       |                                                                                                                 |       |
|--------------|------|------|------|------|-------|-----------------------------------------------------------------------------------------------------------------|-------|
| A_23_P153461 | 1.1  | 1.0  | 1.1  | -5.4 | LPPR2 | Homo sapiens lipid phosphate phosphatase-related protein type 2 (LPPR2), transcript variant 1, mRNA [NM_022737] | 64748 |
| A_23_P67569  | -1.0 | 3.1  | -1.9 | 1.8  | LPPR3 | Homo sapiens lipid phosphate phosphatase-related protein type 3 (LPPR3), mRNA [NM_024888]                       | 79948 |
| A_32_P148538 | 1.0  | -3.4 | 1.4  | 1.0  | LPPR4 | Homo sapiens lipid phosphate phosphatase-related protein type 4 (LPPR4), transcript variant 1, mRNA [NM_014839] | 9890  |

|              |      |     |      |      |       |                                                                                                                        |        |
|--------------|------|-----|------|------|-------|------------------------------------------------------------------------------------------------------------------------|--------|
| A_32_P80413  | 2.2  | 1.5 | -1.1 | 2.7  | LPPR5 | Homo sapiens lipid phosphate phosphatase-related protein type 5 (LPPR5), transcript variant 2, mRNA [NM_001010861]     | 163404 |
| A_23_P87150  | -1.4 | 2.1 | -1.6 | 2.3  | LPXN  | Homo sapiens leupaxin (LPXN), transcript variant 2, mRNA [NM_004811]                                                   | 9404   |
| A_23_P167182 | -3.6 | 1.0 | -1.4 | -1.1 | LRAT  | Homo sapiens lecithin retinol acyltransferase (phosphatidylcholine-retinol O-acyltransferase) (LRAT), mRNA [NM_004744] | 9227   |



|              |      |      |      |     |       |                                                                                                                                  |       |
|--------------|------|------|------|-----|-------|----------------------------------------------------------------------------------------------------------------------------------|-------|
| A_24_P360078 | -3.6 | -3.2 | -1.0 | 1.0 | LRBA  | Homo sapiens LPS-responsive vesicle trafficking, beach and anchor containing (LRBA), transcript variant 2, mRNA [NM_006726]      | 987   |
| A_24_P170774 | 3.2  | 3.0  | -2.5 | 3.1 | LRCH1 | Homo sapiens leucine-rich repeats and calponin homology (CH) domain containing 1 (LRCH1), transcript variant 2, mRNA [NM_015116] | 23143 |
| A_23_P355364 | 4.2  | 11.3 | 7.2  | 4.1 | LRCH3 | Homo sapiens leucine-rich repeats and calponin homology (CH) domain containing 3 (LRCH3), mRNA [NM_032773]                       | 84859 |

|             |      |     |      |      |       |                                                                                                                                         |       |
|-------------|------|-----|------|------|-------|-----------------------------------------------------------------------------------------------------------------------------------------|-------|
| A_24_P40775 | -1.3 | 1.4 | 1.7  | -2.1 | LRFN1 | Homo sapiens leucine rich repeat and fibronectin type III domain containing 1 (LRFN1), mRNA [NM_020862]                                 | 57622 |
| A_24_P93870 | 1.7  | 2.7 | 1.6  | 2.8  | LRFN1 | Homo sapiens leucine rich repeat and fibronectin type III domain containing 1, mRNA (cDNA clone IMAGE:3860672), partial cds. [BC014678] | 57622 |
| A_32_P82111 | -3.6 | 1.3 | -2.7 | 1.5  | LRFN2 | Homo sapiens leucine rich repeat and fibronectin type III domain containing 2 (LRFN2), mRNA [NM_020737]                                 | 57497 |

|              |     |      |      |      |       |                                                                                                         |        |
|--------------|-----|------|------|------|-------|---------------------------------------------------------------------------------------------------------|--------|
| A_24_P117053 | 1.7 | 2.6  | 2.2  | 1.9  | LRFN3 | Homo sapiens leucine rich repeat and fibronectin type III domain containing 3 (LRFN3), mRNA [NM_024509] | 79414  |
| A_23_P163195 | 2.3 | 1.9  | 2.1  | 1.1  | LRFN5 | Homo sapiens leucine rich repeat and fibronectin type III domain containing 5 (LRFN5), mRNA [NM_152447] | 145581 |
| A_23_P50638  | 1.0 | -1.4 | -3.2 | -1.4 | LRG1  | Homo sapiens leucine-rich alpha-2-glycoprotein 1 (LRG1), mRNA [NM_052972]                               | 116844 |

|              |     |      |      |      |       |                                                                                                                     |        |
|--------------|-----|------|------|------|-------|---------------------------------------------------------------------------------------------------------------------|--------|
| A_24_P346517 | 6.0 | 2.2  | 4.3  | 4.9  | LRGUK | Homo sapiens leucine-rich repeats and guanylate kinase domain containing (LRGUK), mRNA [NM_144648]                  | 136332 |
| A_23_P160869 | 1.0 | -1.0 | -2.1 | -1.1 | LRIG2 | Homo sapiens leucine-rich repeats and immunoglobulin-like domains 2 (LRIG2), mRNA [NM_014813]                       | 9860   |
| A_23_P47885  | 1.3 | -1.1 | -1.4 | -2.2 | LRIG3 | Homo sapiens leucine-rich repeats and immunoglobulin-like domains 3 (LRIG3), transcript variant 2, mRNA [NM_153377] | 121227 |

|              |      |      |      |      |       |                                                                                                  |       |
|--------------|------|------|------|------|-------|--------------------------------------------------------------------------------------------------|-------|
| A_23_P98910  | 2.5  | -1.9 | -1.4 | -1.2 | LRMP  | Homo sapiens lymphoid-restricted membrane protein (LRMP), transcript variant 1, mRNA [NM_006152] | 4033  |
| A_24_P926770 | -1.5 | 1.9  | -2.4 | 1.1  | LRP10 | Homo sapiens low density lipoprotein receptor-related protein 10 (LRP10), mRNA [NM_014045]       | 26020 |
| A_23_P205499 | 1.6  | -1.6 | 2.3  | -3.1 | LRP10 | Homo sapiens low density lipoprotein receptor-related protein 10 (LRP10), mRNA [NM_014045]       | 26020 |

|              |      |      |      |      |        |                                                                                                                  |       |
|--------------|------|------|------|------|--------|------------------------------------------------------------------------------------------------------------------|-------|
| A_24_P415012 | -4.6 | 1.0  | -1.0 | 1.1  | LRP12  | Homo sapiens low density lipoprotein receptor-related protein 12 (LRP12), transcript variant 1, mRNA [NM_013437] | 29967 |
| A_24_P944741 | -1.0 | -6.2 | -1.2 | -1.1 | LRP2BP | Homo sapiens LRP2 binding protein (LRP2BP), mRNA [NM_018409]                                                     | 55805 |
| A_23_P1505   | 2.4  | 1.6  | 2.7  | 3.0  | LRP5   | Homo sapiens low density lipoprotein receptor-related protein 5 (LRP5), mRNA [NM_002335]                         | 4041  |
| A_23_P392457 | 1.1  | 1.0  | 2.8  | 1.1  | LRP6   | Homo sapiens low density lipoprotein receptor-related protein 6 (LRP6), mRNA [NM_002336]                         | 4040  |

|              |      |      |      |      |        |                                                                                                                                           |      |
|--------------|------|------|------|------|--------|-------------------------------------------------------------------------------------------------------------------------------------------|------|
| A_23_P150827 | -1.7 | -2.2 | -1.5 | -4.8 | LRP6   | Homo sapiens low density lipoprotein receptor-related protein 6 (LRP6), mRNA [NM_002336]                                                  | 4040 |
| A_23_P34325  | 1.9  | 2.2  | 1.4  | 1.7  | LRP8   | Homo sapiens low density lipoprotein receptor-related protein 8, apolipoprotein E receptor (LRP8), transcript variant 2, mRNA [NM_033300] | 7804 |
| A_24_P196568 | -1.3 | -4.9 | 1.3  | -1.0 | LRPAP1 | Homo sapiens low density lipoprotein receptor-related protein associated protein 1 (LRPAP1), mRNA [NM_002337]                             | 4043 |

|              |     |      |      |      |        |                                                                                                               |       |
|--------------|-----|------|------|------|--------|---------------------------------------------------------------------------------------------------------------|-------|
| A_32_P460399 | 1.1 | -2.9 | 1.1  | 1.1  | LRPAP1 | Homo sapiens low density lipoprotein receptor-related protein associated protein 1 (LRPAP1), mRNA [NM_002337] | 4043  |
| A_24_P277331 | 3.6 | -1.3 | -1.3 | -1.1 | LRPAP1 | Homo sapiens low density lipoprotein receptor-related protein associated protein 1 (LRPAP1), mRNA [NM_002337] | 4043  |
| A_24_P26073  | 2.5 | 1.8  | 2.4  | 2.0  | LRPPRC | Homo sapiens leucine-rich PPR-motif containing (LRPPRC), mRNA [NM_133259]                                     | 10128 |



|              |      |      |      |      |         |                                                                                                 |        |
|--------------|------|------|------|------|---------|-------------------------------------------------------------------------------------------------|--------|
| A_24_P460419 | -1.0 | -1.1 | -2.7 | -1.1 | LRRC10B | Homo sapiens leucine rich repeat containing 10B (LRRC10B), mRNA [NM_001145077]                  | 390205 |
| A_23_P134946 | -2.0 | 1.1  | 1.0  | 1.0  | LRRC14  | Homo sapiens leucine rich repeat containing 14 (LRRC14), mRNA [NM_014665]                       | 9684   |
| A_23_P166584 | -1.4 | -1.3 | -4.3 | -1.3 | LRRC15  | Homo sapiens leucine rich repeat containing 15 (LRRC15), transcript variant 2, mRNA [NM_130830] | 131578 |
| A_24_P751327 | 5.1  | 4.7  | 4.5  | 5.0  | LRRC15  | Homo sapiens leucine rich repeat containing 15 (LRRC15), transcript variant 2, mRNA [NM_130830] | 131578 |

|              |      |      |      |      |         |                                                                                                   |        |
|--------------|------|------|------|------|---------|---------------------------------------------------------------------------------------------------|--------|
| A_24_P290079 | -2.0 | -2.0 | -1.7 | -2.1 | LRRC16A | leucine rich repeat containing 16A [Source:HGNC Symbol;Acc:21581] [ENST00000476458]               | 55604  |
| A_23_P19369  | -1.2 | 1.2  | 1.1  | -2.2 | LRRC16A | Homo sapiens leucine rich repeat containing 16A (LRRC16A), transcript variant 1, mRNA [NM_017640] | 55604  |
| A_23_P35494  | 2.2  | 2.2  | -2.1 | -2.9 | LRRC18  | leucine rich repeat containing 18 [Source:HGNC Symbol;Acc:23199] [ENST00000298124]                | 474354 |

|              |      |      |      |      |        |                                                                                                 |        |
|--------------|------|------|------|------|--------|-------------------------------------------------------------------------------------------------|--------|
| A_24_P321125 | -1.2 | -2.1 | -2.9 | -2.5 | LRRC18 | Homo sapiens leucine rich repeat containing 18 (LRRC18), mRNA [NM_001006939]                    | 474354 |
| A_23_P334798 | -1.2 | -1.2 | -3.8 | -1.1 | LRRC2  | Homo sapiens leucine rich repeat containing 2 (LRRC2), mRNA [NM_024512]                         | 79442  |
| A_23_P155463 | -1.3 | 5.1  | -2.6 | -1.6 | LRRC2  | Homo sapiens leucine rich repeat containing 2 (LRRC2), mRNA [NM_024512]                         | 79442  |
| A_23_P61487  | -8.8 | -1.1 | -1.2 | -1.2 | LRRC20 | Homo sapiens leucine rich repeat containing 20 (LRRC20), transcript variant 3, mRNA [NM_018205] | 55222  |

|              |      |      |      |      |        |                                                                                                 |        |
|--------------|------|------|------|------|--------|-------------------------------------------------------------------------------------------------|--------|
| A_23_P36689  | 1.2  | -1.9 | -2.5 | -2.7 | LRRC23 | Homo sapiens leucine rich repeat containing 23 (LRRC23), transcript variant 2, mRNA [NM_006992] | 10233  |
| A_23_P165136 | 1.0  | 1.0  | 1.5  | 3.1  | LRRC25 | Homo sapiens leucine rich repeat containing 25 (LRRC25), mRNA [NM_145256]                       | 126364 |
| A_24_P142151 | -2.2 | -1.8 | -1.1 | 1.4  | LRRC28 | Homo sapiens leucine rich repeat containing 28 (LRRC28), mRNA [NM_144598]                       | 123355 |
| A_23_P333150 | 2.3  | -4.6 | -1.6 | 2.9  | LRRC28 | leucine rich repeat containing 28 [Source:HGNC Symbol;Acc:28355] [ENST00000301981]              | 123355 |

|              |      |      |      |      |        |                                                                                                 |        |
|--------------|------|------|------|------|--------|-------------------------------------------------------------------------------------------------|--------|
| A_24_P281036 | -2.2 | -2.1 | -2.4 | -2.4 | LRRC31 | Homo sapiens leucine rich repeat containing 31 (LRRC31), mRNA [NM_024727]                       | 79782  |
| A_24_P240259 | -3.0 | 1.0  | 1.0  | 1.0  | LRRC31 | Homo sapiens leucine rich repeat containing 31 (LRRC31), mRNA [NM_024727]                       | 79782  |
| A_24_P389916 | 1.8  | 3.5  | -1.5 | 2.6  | LRRC32 | Homo sapiens leucine rich repeat containing 32 (LRRC32), transcript variant 1, mRNA [NM_005512] | 2615   |
| A_23_P41194  | 1.0  | 1.0  | -1.4 | -2.2 | LRRC34 | Homo sapiens leucine rich repeat containing 34 (LRRC34), transcript variant 3, mRNA [NM_153353] | 151827 |

|              |      |      |      |      |          |                                                                                           |        |
|--------------|------|------|------|------|----------|-------------------------------------------------------------------------------------------|--------|
| A_24_P666482 | 1.3  | -2.3 | -1.3 | -1.0 | LRRC37A2 | Homo sapiens leucine rich repeat containing 37, member A2 (LRRC37A2), mRNA [NM_001006607] | 474170 |
| A_23_P331400 | -1.0 | -2.8 | 1.3  | -2.3 | LRRC37A3 | Homo sapiens leucine rich repeat containing 37, member A3 (LRRC37A3), mRNA [NM_199340]    | 374819 |
| A_32_P94660  | 2.3  | 2.2  | 2.0  | 2.0  | LRRC37B  | Homo sapiens leucine rich repeat containing 37B (LRRC37B), mRNA [NM_052888]               | 114659 |

|              |     |      |     |      |           |                                                                                                      |        |
|--------------|-----|------|-----|------|-----------|------------------------------------------------------------------------------------------------------|--------|
| A_24_P144983 | 2.3 | 1.3  | 1.3 | -1.3 | LRRC37BP1 | Homo sapiens leucine rich repeat containing 37B pseudogene 1 (LRRC37BP1), non-coding RNA [NR_015341] | 147172 |
| A_32_P28402  | 1.0 | -1.0 | 2.1 | -1.0 | LRRC37BP1 | Homo sapiens leucine rich repeat containing 37B pseudogene 1 (LRRC37BP1), non-coding RNA [NR_015341] | 147172 |
| A_24_P307674 | 6.2 | 1.6  | 5.4 | 2.7  | LRRC41    | leucine rich repeat containing 41 [Source:HGNC Symbol;Acc:16917] [ENST0000254454]                    | 10489  |

|              |      |      |      |      |        |                                                                           |        |
|--------------|------|------|------|------|--------|---------------------------------------------------------------------------|--------|
| A_24_P276791 | 4.6  | 4.7  | 4.3  | 2.7  | LRRC42 | Homo sapiens leucine rich repeat containing 42 (LRRC42), mRNA [NM_052940] | 115353 |
| A_23_P381461 | -3.0 | 4.5  | 1.5  | -1.2 | LRRC45 | Homo sapiens leucine rich repeat containing 45 (LRRC45), mRNA [NM_144999] | 201255 |
| A_24_P19662  | 3.0  | 4.7  | 3.1  | 4.9  | LRRC47 | Homo sapiens leucine rich repeat containing 47 (LRRC47), mRNA [NM_020710] | 57470  |
| A_23_P96775  | -4.4 | -1.0 | -1.1 | -1.1 | LRRC47 | Homo sapiens leucine rich repeat containing 47 (LRRC47), mRNA [NM_020710] | 57470  |



|              |      |      |      |      |        |                                                                                                 |        |
|--------------|------|------|------|------|--------|-------------------------------------------------------------------------------------------------|--------|
| A_24_P270971 | -2.4 | -1.2 | -1.3 | -1.2 | LRRC48 | Homo sapiens leucine rich repeat containing 48 (LRRC48), transcript variant 2, mRNA [NM_031294] | 83450  |
| A_23_P24457  | 2.9  | -1.3 | 2.5  | 2.5  | LRRC4C | Homo sapiens leucine rich repeat containing 4C (LRRC4C), mRNA [NM_020929]                       | 57689  |
| A_24_P819890 | -9.3 | -1.0 | -3.5 | -1.0 | LRRC55 | Homo sapiens leucine rich repeat containing 55 (LRRC55), mRNA [NM_001005210]                    | 219527 |
| A_24_P1389   | -1.0 | -1.1 | -2.8 | -1.1 | LRRC55 | Homo sapiens leucine rich repeat containing 55 (LRRC55), mRNA [NM_001005210]                    | 219527 |

|              |       |      |      |      |        |                                                                              |           |
|--------------|-------|------|------|------|--------|------------------------------------------------------------------------------|-----------|
| A_24_P181585 | -1.1  | -2.1 | -2.1 | 1.1  | LRRC59 | Homo sapiens leucine rich repeat containing 59 (LRRC59), mRNA [NM_018509]    | 55379     |
| A_23_P112004 | -1.5  | -1.9 | -1.3 | -3.3 | LRRC6  | Homo sapiens leucine rich repeat containing 6 (LRRC6), mRNA [NM_012472]      | 23639     |
| A_23_P41664  | -38.6 | -2.1 | 1.1  | 1.0  | LRRC70 | Homo sapiens leucine rich repeat containing 70 (LRRC70), mRNA [NM_181506]    | 100130733 |
| A_32_P222149 | 3.0   | 1.3  | 1.0  | -1.3 | LRRC72 | Homo sapiens leucine rich repeat containing 72 (LRRC72), mRNA [NM_001195280] | 100506049 |

|              |     |     |      |     |        |                                                                                                                 |       |
|--------------|-----|-----|------|-----|--------|-----------------------------------------------------------------------------------------------------------------|-------|
| A_24_P376287 | 3.6 | 2.5 | 3.9  | 1.9 | LRRC8A | Homo sapiens leucine rich repeat containing 8 family, member A (LRRC8A), transcript variant 2, mRNA [NM_019594] | 56262 |
| A_24_P943949 | 2.1 | 1.5 | -1.1 | 3.7 | LRRC8B | Homo sapiens leucine rich repeat containing 8 family, member B (LRRC8B), transcript variant 1, mRNA [NM_015350] | 23507 |
| A_23_P103775 | 1.6 | 3.2 | 3.4  | 3.5 | LRRC8C | Homo sapiens leucine rich repeat containing 8 family, member C (LRRC8C), mRNA [NM_032270]                       | 84230 |

|              |     |     |      |      |        |                                                                                                 |        |
|--------------|-----|-----|------|------|--------|-------------------------------------------------------------------------------------------------|--------|
| A_23_P157527 | 2.2 | 2.2 | 2.1  | 2.2  | LRRCC1 | Homo sapiens leucine rich repeat and coiled-coil domain containing 1 (LRRCC1), mRNA [NM_033402] | 85444  |
| A_23_P331072 | 1.4 | 1.4 | -3.4 | -8.0 | LRRIQ3 | leucine-rich repeats and IQ motif containing 3 [Source:HGNC Symbol;Acc:28318] [ENST00000463724] | 127255 |
| A_23_P128447 | 1.1 | 1.1 | 2.5  | 1.1  | LRRK2  | Homo sapiens leucine-rich repeat kinase 2 (LRRK2), mRNA [NM_198578]                             | 120892 |

|              |      |      |      |      |        |                                                                                             |        |
|--------------|------|------|------|------|--------|---------------------------------------------------------------------------------------------|--------|
| A_23_P11843  | 2.7  | 1.2  | 1.5  | -1.1 | LRRN2  | Homo sapiens leucine rich repeat neuronal 2 (LRRN2), transcript variant 2, mRNA [NM_201630] | 10446  |
| A_24_P187766 | -2.2 | -1.0 | -1.4 | -1.5 | LRRN3  | Homo sapiens leucine rich repeat neuronal 3 (LRRN3), transcript variant 3, mRNA [NM_018334] | 54674  |
| A_23_P120545 | -1.0 | -6.0 | -1.0 | -1.0 | LRRN4  | Homo sapiens cDNA FLJ23994 fis, clone HRC11286 . [AK172833]                                 | 164312 |
| A_23_P366999 | -1.0 | 1.2  | -1.0 | -8.2 | LRRTM3 | Homo sapiens leucine rich repeat transmembrane neuronal 3 (LRRTM3), mRNA [NM_178011]        | 347731 |

|              |      |      |      |      |        |                                                                                                                        |       |
|--------------|------|------|------|------|--------|------------------------------------------------------------------------------------------------------------------------|-------|
| A_24_P60268  | -2.3 | -4.1 | -2.2 | -2.1 | LRRTM4 | Homo sapiens leucine rich repeat transmembrane neuronal 4 (LRRTM4), transcript variant 2, mRNA [NM_024993]             | 80059 |
| A_24_P666105 | -1.0 | -2.9 | -1.0 | 1.0  | LRRTM4 | Homo sapiens leucine rich repeat transmembrane neuronal 4 (LRRTM4), transcript variant 1, mRNA [NM_00134745]           | 80059 |
| A_23_P123916 | -1.4 | -2.7 | -3.4 | -1.6 | LRSAM1 | Homo sapiens leucine rich repeat and sterile alpha motif containing 1 (LRSAM1), transcript variant 1, mRNA [NM_138361] | 90678 |

|              |     |     |     |     |        |                                                                                                                                       |        |
|--------------|-----|-----|-----|-----|--------|---------------------------------------------------------------------------------------------------------------------------------------|--------|
| A_23_P318616 | 1.0 | 1.0 | 2.0 | 1.8 | LRTM2  | Homo sapiens leucine-rich repeats and transmembrane domains 2 (LRTM2), transcript variant 1, mRNA [NM_001039029]                      | 654429 |
| A_24_P357914 | 4.2 | 1.1 | 3.5 | 2.0 | LRTOMT | Homo sapiens leucine rich transmembrane and O-methyltransferase domain containing (LRTOMT), transcript variant 4, mRNA [NM_001145308] | 220074 |

|              |     |      |     |      |        |                                                                                                                                    |        |
|--------------|-----|------|-----|------|--------|------------------------------------------------------------------------------------------------------------------------------------|--------|
| A_24_P184385 | 1.7 | 1.0  | 2.2 | 1.9  | LRTOMT | Homo sapiens leucine rich transmembrane and O-methyltransferase domain containing (LRTOMT), transcript variant 1, mRNA [NM_145309] | 220074 |
| A_23_P98763  | 2.5 | -1.1 | 1.4 | -1.3 | LRTOMT | Homo sapiens leucine rich transmembrane and O-methyltransferase domain containing (LRTOMT), transcript variant 1, mRNA [NM_145309] | 220074 |



|              |      |      |      |      |       |                                                                                               |        |
|--------------|------|------|------|------|-------|-----------------------------------------------------------------------------------------------|--------|
| A_23_P360874 | 1.6  | 1.2  | 1.2  | -2.8 | LRWD1 | Homo sapiens leucine-rich repeats and WD repeat domain containing 1 (LRWD1), mRNA [NM_152892] | 222229 |
| A_23_P301855 | -1.2 | 2.0  | -3.2 | -1.8 | LSAMP | Homo sapiens limbic system-associated membrane protein (LSAMP), mRNA [NM_002338]              | 4045   |
| A_24_P148657 | 1.6  | -2.7 | 1.0  | -1.2 | LSG1  | Homo sapiens large subunit GTPase 1 homolog (S. cerevisiae) (LSG1), mRNA [NM_018385]          | 55341  |

|              |      |      |      |      |       |                                                                                                                           |        |
|--------------|------|------|------|------|-------|---------------------------------------------------------------------------------------------------------------------------|--------|
| A_23_P20384  | 1.5  | 1.4  | 1.3  | 2.0  | LSM1  | Homo sapiens LSM1 homolog, U6 small nuclear RNA associated (S. cerevisiae) (LSM1), transcript variant 1, mRNA [NM_014462] | 27257  |
| A_23_P307430 | 1.5  | 2.6  | -1.7 | 1.9  | LSM12 | Homo sapiens LSM12 homolog (S. cerevisiae) (LSM12), mRNA [NM_152344]                                                      | 124801 |
| A_32_P95537  | -6.7 | -1.0 | -1.5 | -1.0 | LSM12 | Homo sapiens LSM12 homolog (S. cerevisiae) (LSM12), mRNA [NM_152344]                                                      | 124801 |

|              |      |      |      |      |        |                                                                                                      |        |
|--------------|------|------|------|------|--------|------------------------------------------------------------------------------------------------------|--------|
| A_24_P365327 | 1.4  | 2.5  | -1.1 | -1.2 | LSM14A | Homo sapiens LSM14A, SCD6 homolog A (S. cerevisiae) (LSM14A), transcript variant 2, mRNA [NM_015578] | 26065  |
| A_23_P362719 | 1.2  | -1.3 | 2.0  | -3.1 | LSM14B | Homo sapiens LSM14B, SCD6 homolog B (S. cerevisiae) (LSM14B), mRNA [NM_144703]                       | 149986 |
| A_23_P59153  | -2.1 | 2.6  | 1.8  | 1.4  | LSM2   | Homo sapiens LSM2 homolog, U6 small nuclear RNA associated (S. cerevisiae) (LSM2), mRNA [NM_021177]  | 57819  |

|              |      |      |      |      |       |                                                                                                     |       |
|--------------|------|------|------|------|-------|-----------------------------------------------------------------------------------------------------|-------|
| A_23_P421563 | -1.6 | -6.4 | -6.2 | -2.1 | LSM3  | Homo sapiens LSM3 homolog, U6 small nuclear RNA associated (S. cerevisiae) (LSM3), mRNA [NM_014463] | 27258 |
| A_23_P259451 | -2.0 | -1.0 | -1.1 | -1.4 | LSM6  | Homo sapiens LSM6 homolog, U6 small nuclear RNA associated (S. cerevisiae) (LSM6), mRNA [NM_007080] | 11157 |
| A_23_P38206  | -9.1 | 1.0  | 1.0  | 1.0  | LSMD1 | Homo sapiens LSM domain containing 1 (LSMD1), mRNA [NM_032356]                                      | 84316 |
| A_23_P358555 | -1.9 | -5.7 | -1.7 | -5.6 | LSMD1 | Homo sapiens LSM domain containing 1 (LSMD1), mRNA [NM_032356]                                      | 84316 |

|              |      |     |      |      |      |                                                                                                                       |       |
|--------------|------|-----|------|------|------|-----------------------------------------------------------------------------------------------------------------------|-------|
| A_23_P142389 | -2.0 | 1.3 | 1.2  | -2.3 | LSR  | Homo sapiens lipolysis stimulated lipoprotein receptor (LSR), transcript variant 2, mRNA [NM_205834]                  | 51599 |
| A_24_P384839 | 3.3  | 3.3 | -1.4 | 2.2  | LSS  | Homo sapiens lanosterol synthase (2,3-oxidosqualene-lanosterol cyclase) (LSS), transcript variant 1, mRNA [NM_002340] | 4047  |
| A_24_P94916  | 3.5  | 2.4 | 1.2  | -2.0 | LST1 | Homo sapiens leukocyte specific transcript 1 (LST1), transcript variant 1, mRNA [NM_007161]                           | 7940  |

|              |      |      |      |      |        |                                                                                                          |       |
|--------------|------|------|------|------|--------|----------------------------------------------------------------------------------------------------------|-------|
| A_23_P156683 | -4.1 | 1.6  | 1.0  | -1.4 | LTA    | Homo sapiens lymphotoxin alpha (TNF superfamily, member 1) (LTA), transcript variant 2, mRNA [NM_000595] | 4049  |
| A_23_P151791 | -2.6 | -1.3 | -1.9 | -3.0 | LTB4R  | Homo sapiens leukotriene B4 receptor (LTB4R), transcript variant 1, mRNA [NM_181657]                     | 1241  |
| A_23_P163173 | 1.2  | 1.0  | -3.8 | -2.2 | LTB4R2 | Homo sapiens leukotriene B4 receptor 2 (LTB4R2), transcript variant 1, mRNA [NM_019839]                  | 56413 |

|              |      |      |      |      |       |                                                                                                 |      |
|--------------|------|------|------|------|-------|-------------------------------------------------------------------------------------------------|------|
| A_23_P405129 | -2.1 | 1.0  | -3.9 | 1.0  | LTBP2 | Homo sapiens latent transforming growth factor beta binding protein 2 (LTBP2), mRNA [NM_000428] | 4053 |
| A_24_P167668 | -3.1 | -5.5 | -4.4 | -1.4 | LTBP2 | Homo sapiens latent transforming growth factor beta binding protein 2 (LTBP2), mRNA [NM_000428] | 4053 |
| A_24_P176173 | 1.9  | 2.1  | 1.4  | 1.5  | LTBP2 | Homo sapiens latent transforming growth factor beta binding protein 2 (LTBP2), mRNA [NM_000428] | 4053 |

|              |      |      |      |      |       |                                                                                                                          |      |
|--------------|------|------|------|------|-------|--------------------------------------------------------------------------------------------------------------------------|------|
| A_24_P264790 | -2.2 | -2.6 | 1.4  | -2.1 | LTBP3 | Homo sapiens latent transforming growth factor beta binding protein 3 (LTBP3), transcript variant 2, mRNA [NM_021070]    | 4054 |
| A_24_P298360 | -4.0 | 1.5  | 1.4  | 1.0  | LTBP3 | Homo sapiens latent transforming growth factor beta binding protein 3 (LTBP3), transcript variant 2, mRNA [NM_021070]    | 4054 |
| A_23_P141946 | 2.3  | 2.9  | -1.3 | 1.7  | LTBP4 | Homo sapiens latent transforming growth factor beta binding protein 4 (LTBP4), transcript variant 1, mRNA [NM_001042544] | 8425 |



|              |      |      |      |      |       |                                                                                               |       |
|--------------|------|------|------|------|-------|-----------------------------------------------------------------------------------------------|-------|
| A_24_P397294 | 1.4  | -4.5 | -1.4 | -1.5 | LTC4S | Homo sapiens leukotriene C4 synthase (LTC4S), mRNA [NM_145867]                                | 4056  |
| A_23_P14853  | -1.3 | 5.3  | -1.3 | -1.5 | LTK   | Homo sapiens leukocyte receptor tyrosine kinase (LTK), transcript variant 1, mRNA [NM_002344] | 4058  |
| A_32_P115505 | -2.6 | 1.0  | -1.0 | 1.1  | LTN1  | Homo sapiens listerin E3 ubiquitin protein ligase 1 (LTN1), mRNA [NM_015565]                  | 26046 |
| A_23_P106737 | 1.2  | 1.3  | -2.7 | -1.0 | LUC7L | Homo sapiens LUC7-like (S. cerevisiae) (LUC7L), transcript variant 2, mRNA [NM_201412]        | 55692 |

|              |     |     |       |      |        |                                                                                           |        |
|--------------|-----|-----|-------|------|--------|-------------------------------------------------------------------------------------------|--------|
| A_23_P59787  | 1.1 | 1.1 | -2.3  | 1.5  | LUC7L2 | Homo sapiens LUC7-like 2 (S. cerevisiae) (LUC7L2), transcript variant 1, mRNA [NM_016019] | 51631  |
| A_24_P382113 | 1.9 | 1.9 | 2.5   | 1.6  | LUC7L3 | Homo sapiens LUC7-like 3 (S. cerevisiae) (LUC7L3), transcript variant 2, mRNA [NM_006107] | 51747  |
| A_23_P385084 | 1.1 | 1.1 | -23.6 | -1.0 | LUZP1  | Homo sapiens mRNA for FLJ00226 protein. [AK074153]                                        | 7798   |
| A_24_P649282 | 1.1 | 1.1 | 1.0   | -2.0 | LUZP2  | Homo sapiens leucine zipper protein 2 (LUZP2), transcript variant 1, mRNA [NM_001009909]  | 338645 |

|              |      |      |      |      |       |                                                                                                   |       |
|--------------|------|------|------|------|-------|---------------------------------------------------------------------------------------------------|-------|
| A_23_P96611  | -2.3 | -1.4 | -1.3 | -1.3 | LUZP4 | Homo sapiens leucine zipper protein 4 (LUZP4), mRNA [NM_016383]                                   | 51213 |
| A_23_P6674   | 6.7  | 9.4  | 2.1  | 1.7  | LXN   | Homo sapiens latexin (LXN), mRNA [NM_020169]                                                      | 56925 |
| A_23_P134764 | -3.3 | 2.2  | 1.4  | -1.2 | LY6D  | Homo sapiens lymphocyte antigen 6 complex, locus D (LY6D), mRNA [NM_003695]                       | 8581  |
| A_32_P138348 | -1.0 | -1.0 | -2.5 | -2.1 | LY6K  | Homo sapiens lymphocyte antigen 6 complex, locus K (LY6K), transcript variant 1, mRNA [NM_017527] | 54742 |

|              |      |      |      |     |      |                                                                                                   |       |
|--------------|------|------|------|-----|------|---------------------------------------------------------------------------------------------------|-------|
| A_23_P397285 | -1.0 | -1.1 | -3.3 | 2.8 | LY6K | Homo sapiens lymphocyte antigen 6 complex, locus K (LY6K), transcript variant 1, mRNA [NM_017527] | 54742 |
| A_23_P70688  | 2.7  | 3.4  | 2.8  | 1.0 | LY86 | Homo sapiens lymphocyte antigen 86 (LY86), mRNA [NM_004271]                                       | 9450  |
| A_24_P324674 | 1.0  | 1.6  | 2.6  | 2.7 | LY9  | Homo sapiens lymphocyte antigen 9 (LY9), transcript variant 1, mRNA [NM_002348]                   | 4063  |
| A_23_P41327  | 1.7  | 2.1  | -1.5 | 2.7 | LYAR | Homo sapiens Ly1 antibody reactive homolog (mouse) (LYAR), transcript variant 1, mRNA [NM_017816] | 55646 |

|              |      |      |      |      |       |                                                                                 |        |
|--------------|------|------|------|------|-------|---------------------------------------------------------------------------------|--------|
| A_23_P165707 | -1.0 | -1.0 | -1.0 | -2.6 | LYG1  | Homo sapiens lysozyme G-like 1 (LYG1), mRNA [NM_174898]                         | 129530 |
| A_23_P5281   | -1.1 | 1.7  | -2.6 | -1.2 | LYL1  | Homo sapiens lymphoblastic leukemia derived sequence 1 (LYL1), mRNA [NM_005583] | 4066   |
| A_23_P111981 | -1.2 | 2.2  | 1.5  | -1.6 | LYNX1 | Homo sapiens Ly6/neurotoxin 1 (LYNX1), transcript variant 3, mRNA [NM_177457]   | 66004  |
| A_24_P341863 | 1.3  | 1.6  | -2.1 | -1.1 | LYNX1 | Homo sapiens Ly6/neurotoxin 1 (LYNX1), transcript variant 1, mRNA [NM_023946]   | 66004  |

|              |      |     |      |     |        |                                                                                    |        |
|--------------|------|-----|------|-----|--------|------------------------------------------------------------------------------------|--------|
| A_23_P257672 | 1.2  | 3.1 | -1.2 | 1.5 | LYNX1  | Homo sapiens Ly6/neurotoxin 1 (LYNX1), transcript variant SLURP2, mRNA [NM_177458] | 66004  |
| A_23_P39265  | 1.9  | 1.8 | 2.5  | 2.2 | LYPD3  | Homo sapiens LY6/PLAUR domain containing 3 (LYPD3), mRNA [NM_014400]               | 27076  |
| A_23_P311780 | -2.1 | 1.4 | -1.5 | 1.1 | LYPD4  | LY6/PLAUR domain containing 4 [Source:HGNC Symbol;Acc:28659] [ENST00000330743]     | 147719 |
| A_23_P79302  | -2.9 | 1.7 | 1.7  | 1.8 | LYPD6B | Homo sapiens LY6/PLAUR domain containing 6B (LYPD6B), mRNA [NM_177964]             | 130576 |

|              |      |      |      |      |        |                                                                                     |       |
|--------------|------|------|------|------|--------|-------------------------------------------------------------------------------------|-------|
| A_23_P214091 | 1.2  | 2.1  | 1.1  | -1.2 | LYPLA1 | Homo sapiens lysophospholipase I (LYPLA1), mRNA [NM_006330]                         | 10434 |
| A_23_P42036  | 2.4  | -1.1 | 2.9  | -1.3 | LYRM2  | Homo sapiens LYR motif containing 2 (LYRM2), transcript variant 1, mRNA [NM_020466] | 57226 |
| A_24_P312072 | -4.2 | -5.5 | -1.4 | -1.4 | LYRM4  | Homo sapiens LYR motif containing 4 (LYRM4), transcript variant 1, mRNA [NM_020408] | 57128 |
| A_23_P254997 | 3.3  | 3.4  | 6.2  | 2.2  | LYRM4  | Homo sapiens LYR motif containing 4 (LYRM4), transcript variant 1, mRNA [NM_020408] | 57128 |

|              |      |      |      |      |        |                                                                                                                         |        |
|--------------|------|------|------|------|--------|-------------------------------------------------------------------------------------------------------------------------|--------|
| A_23_P337464 | 66.4 | 65.1 | 65.9 | 66.2 | LYRM7  | Homo sapiens Lym7 homolog (mouse) (LYRM7), mRNA [NM_181705]                                                             | 90624  |
| A_32_P120895 | -1.0 | -1.0 | -3.0 | 1.0  | LYSMD2 | Homo sapiens LysM, putative peptidoglycan-binding, domain containing 2 (LYSMD2), transcript variant 1, mRNA [NM_153374] | 256586 |
| A_23_P354074 | 2.0  | 2.1  | 2.1  | 2.1  | LYST   | Homo sapiens lysosomal trafficking regulator (LYST), mRNA [NM_000081]                                                   | 1130   |
| A_23_P46740  | 2.2  | -1.1 | 1.1  | -1.2 | LYZL1  | Homo sapiens lysozyme-like 1 (LYZL1), mRNA [NM_032517]                                                                  | 84569  |



|              |      |      |      |      |        |                                                                                      |       |
|--------------|------|------|------|------|--------|--------------------------------------------------------------------------------------|-------|
| A_24_P37519  | 3.4  | 3.3  | 3.0  | 3.2  | LZTFL1 | Homo sapiens leucine zipper transcription factor-like 1 (LZTFL1), mRNA [NM_020347]   | 54585 |
| A_23_P57401  | -1.3 | -1.1 | -1.6 | -2.3 | LZTR1  | Homo sapiens leucine-zipper-like transcription regulator 1 (LZTR1), mRNA [NM_006767] | 8216  |
| A_23_P149852 | 1.9  | 1.0  | 2.2  | -1.2 | LZTS2  | Homo sapiens leucine zipper, putative tumor suppressor 2 (LZTS2), mRNA [NM_032429]   | 84445 |
| A_23_P149847 | 1.3  | 1.7  | 1.5  | -2.2 | LZTS2  | Homo sapiens leucine zipper, putative tumor suppressor 2 (LZTS2), mRNA [NM_032429]   | 84445 |

|              |     |      |      |      |         |                                                                                                             |        |
|--------------|-----|------|------|------|---------|-------------------------------------------------------------------------------------------------------------|--------|
| A_24_P210343 | 3.5 | 2.0  | 1.9  | 2.0  | M6PR    | Homo sapiens mannose-6-phosphate receptor (cation dependent) (M6PR), transcript variant 1, mRNA [NM_002355] | 4074   |
| A_23_P53884  | 1.9 | 4.3  | 3.3  | 3.4  | MAB21L1 | Homo sapiens mab-21-like 1 (C. elegans) (MAB21L1), mRNA [NM_005584]                                         | 4081   |
| A_24_P148907 | 1.3 | -1.1 | -2.8 | 1.1  | MAB21L2 | Homo sapiens mab-21-like 2 (C. elegans) (MAB21L2), mRNA [NM_006439]                                         | 10586  |
| A_23_P343366 | 1.1 | -2.0 | 1.4  | -2.0 | MAB21L3 | Homo sapiens mab-21-like 3 (C. elegans) (MAB21L3), mRNA [NM_152367]                                         | 126868 |

|              |      |      |      |      |         |                                                                                                      |        |
|--------------|------|------|------|------|---------|------------------------------------------------------------------------------------------------------|--------|
| A_24_P233946 | 3.0  | 3.1  | 3.2  | 2.4  | MAB21L3 | Homo sapiens mab-21-like 3 (C. elegans) (MAB21L3), mRNA [NM_152367]                                  | 126868 |
| A_32_P158272 | -7.3 | -3.8 | -1.2 | -1.0 | MACC1   | Homo sapiens metastasis associated in colon cancer 1 (MACC1), mRNA [NM_182762]                       | 346389 |
| A_24_P418637 | -3.6 | -3.9 | -2.8 | -3.0 | MACF1   | Homo sapiens microtubule-actin crosslinking factor 1 (MACF1), transcript variant 1, mRNA [NM_012090] | 23499  |
| A_23_P143334 | 2.0  | -1.2 | -2.8 | 1.1  | MACROD2 | MACRO domain containing 2 [Source:HGNC Symbol;Acc:16126] [ENST00000462552]                           | 140733 |

|             |      |      |      |      |         |                                                                                          |        |
|-------------|------|------|------|------|---------|------------------------------------------------------------------------------------------|--------|
| A_32_P89352 | -6.4 | 1.1  | 1.1  | -1.1 | MACROD2 | Homo sapiens MACRO domain containing 2 (MACROD2), transcript variant 1, mRNA [NM_080676] | 140733 |
| A_23_P22398 | -2.3 | -1.0 | -1.1 | 1.0  | MACROD2 | Homo sapiens MACRO domain containing 2 (MACROD2), transcript variant 1, mRNA [NM_080676] | 140733 |
| A_23_P92441 | 1.3  | 2.7  | 2.6  | 2.7  | MAD2L1  | Homo sapiens MAD2 mitotic arrest deficient-like 1 (yeast) (MAD2L1), mRNA [NM_002358]     | 4085   |

|              |     |     |      |     |          |                                                                                                                    |      |
|--------------|-----|-----|------|-----|----------|--------------------------------------------------------------------------------------------------------------------|------|
| A_24_P43588  | 1.8 | 1.2 | -2.2 | 1.6 | MAD2L1BP | Homo sapiens MAD2L1 binding protein (MAD2L1BP), transcript variant 1, mRNA [NM_001003690]                          | 9587 |
| A_23_P153616 | 4.9 | 2.5 | 1.9  | 1.9 | MADCAM1  | Homo sapiens mucosal vascular addressin cell adhesion molecule 1 (MADCAM1), transcript variant 1, mRNA [NM_130760] | 8174 |
| A_24_P10731  | 2.2 | 1.2 | 2.2  | 2.1 | MADCAM1  | Homo sapiens mucosal vascular addressin cell adhesion molecule 1 (MADCAM1), transcript variant 1, mRNA [NM_130760] | 8174 |

|              |     |      |      |      |      |                                                                                                                              |       |
|--------------|-----|------|------|------|------|------------------------------------------------------------------------------------------------------------------------------|-------|
| A_23_P202708 | 3.0 | 4.7  | 2.1  | 2.3  | MADD | Homo sapiens MAP-kinase activating death domain (MADD), transcript variant 4, mRNA [NM_003682]                               | 8567  |
| A_23_P114934 | 1.1 | 1.0  | -1.1 | -7.5 | MAEL | Homo sapiens maelstrom homolog (Drosophila) (MAEL), mRNA [NM_032858]                                                         | 84944 |
| A_23_P397376 | 1.4 | -2.2 | 1.6  | 1.7  | MAF  | Homo sapiens v-maf musculoaponeurotic fibrosarcoma oncogene homolog (avian) (MAF), transcript variant 2, mRNA [NM_001031804] | 4094  |

|              |      |      |      |      |      |                                                                                                        |        |
|--------------|------|------|------|------|------|--------------------------------------------------------------------------------------------------------|--------|
| A_24_P127719 | -3.0 | -1.3 | -2.8 | -1.8 | MAFA | Homo sapiens v-maf musculoaponeurotic fibrosarcoma oncogene homolog A (avian) (MAFA), mRNA [NM_201589] | 389692 |
| A_23_P17345  | -1.2 | -2.8 | -7.1 | -1.0 | MAFB | Homo sapiens v-maf musculoaponeurotic fibrosarcoma oncogene homolog B (avian) (MAFB), mRNA [NM_005461] | 9935   |
| A_23_P373598 | -1.0 | -5.9 | -1.1 | -1.0 | MAFK | Homo sapiens v-maf musculoaponeurotic fibrosarcoma oncogene homolog K (avian) (MAFK), mRNA [NM_002360] | 7975   |

|              |      |      |      |      |         |                                                                                                            |      |
|--------------|------|------|------|------|---------|------------------------------------------------------------------------------------------------------------|------|
| A_24_P279704 | 1.3  | -3.0 | 1.9  | 1.1  | MAG     | Homo sapiens myelin associated glycoprotein (MAG), transcript variant 2, mRNA [NM_080600]                  | 4099 |
| A_23_P96291  | -6.1 | 1.0  | -1.0 | 1.0  | MAGEA1  | Homo sapiens melanoma antigen family A, 1 (directs expression of antigen MZ2-E) (MAGEA1), mRNA [NM_004988] | 4100 |
| A_23_P113553 | -3.5 | -3.5 | -3.9 | -3.9 | MAGEA11 | Homo sapiens melanoma antigen family A, 11 (MAGEA11), transcript variant 2, mRNA [NM_001011544]            | 4110 |



|              |      |      |       |      |         |                                                                                              |        |
|--------------|------|------|-------|------|---------|----------------------------------------------------------------------------------------------|--------|
| A_23_P252928 | 1.2  | -3.3 | 1.4   | 1.1  | MAGEA12 | Homo sapiens melanoma antigen family A, 12 (MAGEA12), transcript variant 3, mRNA [NM_005367] | 4111   |
| A_23_P148255 | 8.3  | 11.6 | 11.2  | 12.1 | MAGEA2B | Homo sapiens melanoma antigen family A, 2B (MAGEA2B), mRNA [NM_153488]                       | 266740 |
| A_23_P370054 | -1.0 | -1.1 | -35.9 | -1.4 | MAGEB18 | Homo sapiens melanoma antigen family B, 18 (MAGEB18), mRNA [NM_173699]                       | 286514 |
| A_23_P254831 | 1.6  | 2.2  | 2.0   | 1.4  | MAGEB2  | Homo sapiens melanoma antigen family B, 2 (MAGEB2), mRNA [NM_002364]                         | 4113   |

|              |      |      |      |      |        |                                                                                               |        |
|--------------|------|------|------|------|--------|-----------------------------------------------------------------------------------------------|--------|
| A_23_P96432  | -2.9 | -1.1 | -1.1 | -1.0 | MAGEB3 | Homo sapiens melanoma antigen family B, 3 (MAGEB3), mRNA [NM_002365]                          | 4114   |
| A_23_P378574 | -3.0 | -1.0 | -1.1 | -1.1 | MAGEB6 | Homo sapiens melanoma antigen family B, 6 (MAGEB6), mRNA [NM_173523]                          | 158809 |
| A_23_P135634 | 1.6  | -2.4 | 1.3  | -1.5 | MAGED1 | Homo sapiens NRAGE mRNA, complete cds. [AF217963]                                             | 9500   |
| A_24_P391526 | 3.3  | 3.2  | 3.2  | 3.2  | MAGED1 | Homo sapiens melanoma antigen family D, 1 (MAGED1), transcript variant 1, mRNA [NM_001005333] | 9500   |

|              |      |      |      |     |        |                                                                                                             |       |
|--------------|------|------|------|-----|--------|-------------------------------------------------------------------------------------------------------------|-------|
| A_24_P160263 | -2.0 | -2.2 | -3.6 | 1.0 | MAGED2 | Homo sapiens melanoma antigen family D, 2 (MAGED2), transcript variant 3, mRNA [NM_201222]                  | 10916 |
| A_23_P114445 | 3.5  | 6.8  | 3.6  | 2.8 | MAGEE1 | Homo sapiens melanoma antigen family E, 1 (MAGEE1), mRNA [NM_020932]                                        | 57692 |
| A_23_P21376  | 2.3  | 2.2  | 2.1  | 2.2 | MAGI2  | Homo sapiens membrane associated guanylate kinase, WW and PDZ domain containing 2 (MAGI2), mRNA [NM_012301] | 9863  |

|              |      |      |      |      |           |                                                                                                                          |           |
|--------------|------|------|------|------|-----------|--------------------------------------------------------------------------------------------------------------------------|-----------|
| A_24_P748377 | -1.4 | -1.1 | 1.7  | -3.2 | MAGI2-AS3 | Homo sapiens<br>MAGI2 antisense RNA 3 (non-protein coding) (MAGI2-AS3), transcript variant 1, non-coding RNA [NR_038343] | 100505881 |
| A_24_P66105  | 3.2  | 3.0  | 1.0  | 1.7  | MAGIX     | MAGI family member, X-linked [Source:HGNC Symbol;Acc:30006] [ENST00000376338]                                            | 79917     |
| A_24_P828949 | -2.0 | 1.1  | -1.1 | -1.3 | MAGOHB    | Homo sapiens mago-nashi homolog B (Drosophila) (MAGOHB), mRNA [NM_018048]                                                | 55110     |

|              |       |      |      |      |        |                                                                                                                              |       |
|--------------|-------|------|------|------|--------|------------------------------------------------------------------------------------------------------------------------------|-------|
| A_23_P2423   | -1.1  | -1.9 | -3.2 | -1.7 | MAGOHB | Homo sapiens mago-nashi homolog B (Drosophila) (MAGOHB), mRNA [NM_018048]                                                    | 55110 |
| A_23_P148273 | -2.1  | 1.3  | -2.4 | -1.0 | MAGT1  | Homo sapiens magnesium transporter 1 (MAGT1), mRNA [NM_032121]                                                               | 84061 |
| A_23_P96008  | -13.3 | -1.4 | -3.8 | -1.5 | MALT1  | Homo sapiens mucosa associated lymphoid tissue lymphoma translocation gene 1 (MALT1), transcript variant 1, mRNA [NM_006785] | 10892 |

|              |      |      |      |      |       |                                                                                                                              |       |
|--------------|------|------|------|------|-------|------------------------------------------------------------------------------------------------------------------------------|-------|
| A_24_P116909 | -2.6 | -1.0 | -1.3 | -1.3 | MALT1 | Homo sapiens mucosa associated lymphoid tissue lymphoma translocation gene 1 (MALT1), transcript variant 1, mRNA [NM_006785] | 10892 |
| A_24_P117709 | 1.0  | 1.0  | 1.2  | -2.2 | MAML3 | Homo sapiens mastermind-like 3 (Drosophila) (MAML3), mRNA [NM_018717]                                                        | 55534 |
| A_24_P50208  | -4.4 | 1.5  | -1.2 | -1.1 | MAML3 | mastermind-like 3 (Drosophila) [Source:HGNC Symbol;Acc:16272] [ENST0000398940]                                               | 55534 |

|              |      |      |      |      |        |                                                                                                                                         |        |
|--------------|------|------|------|------|--------|-----------------------------------------------------------------------------------------------------------------------------------------|--------|
| A_24_P297537 | -1.3 | 2.1  | 1.8  | -1.3 | MAMSTR | Homo sapiens MEF2 activating motif and SAP domain containing transcriptional regulator (MAMSTR), transcript variant 2, mRNA [NM_182574] | 284358 |
| A_32_P88603  | 1.6  | -2.7 | -2.0 | 2.2  | MAN1A2 | mannosidase, alpha, class 1A, member 2 [Source:HGNC Symbol;Acc:6822] [ENST0000356554]                                                   | 10905  |
| A_23_P157943 | 2.4  | 2.6  | 1.8  | -1.0 | MAN1B1 | Homo sapiens mannosidase, alpha, class 1B, member 1 (MAN1B1), mRNA [NM_016219]                                                          | 11253  |

|              |      |      |      |      |        |                                                                                |      |
|--------------|------|------|------|------|--------|--------------------------------------------------------------------------------|------|
| A_23_P18931  | -1.0 | 1.4  | 2.7  | -4.4 | MAN2A1 | Homo sapiens mannosidase, alpha, class 2A, member 1 (MAN2A1), mRNA [NM_002372] | 4124 |
| A_24_P381838 | -4.3 | -1.9 | -2.5 | 1.1  | MAN2A2 | Homo sapiens mannosidase, alpha, class 2A, member 2 (MAN2A2), mRNA [NM_006122] | 4122 |
| A_23_P206041 | -1.0 | -1.0 | -3.2 | -3.7 | MAN2A2 | Homo sapiens mannosidase, alpha, class 2A, member 2 (MAN2A2), mRNA [NM_006122] | 4122 |
| A_23_P27613  | -1.2 | 2.7  | -1.4 | 2.1  | MAN2B1 | Homo sapiens lysosomal alpha-mannosidase (manB) mRNA, complete cds. [U60266]   | 4125 |



|              |      |      |      |      |        |                                                                                |       |
|--------------|------|------|------|------|--------|--------------------------------------------------------------------------------|-------|
| A_23_P250380 | -2.1 | -1.1 | 1.2  | -1.7 | MAN2B2 | Homo sapiens mannosidase, alpha, class 2B, member 2 (MAN2B2), mRNA [NM_015274] | 23324 |
| A_23_P250379 | -1.5 | 1.1  | -3.0 | -1.1 | MAN2B2 | Homo sapiens mannosidase, alpha, class 2B, member 2 (MAN2B2), mRNA [NM_015274] | 23324 |
| A_24_P416059 | 1.6  | 3.6  | -1.5 | 1.5  | MAN2C1 | Homo sapiens mannosidase, alpha, class 2C, member 1 (MAN2C1), mRNA [NM_006715] | 4123  |
| A_23_P26117  | 8.6  | -5.8 | 2.1  | 6.8  | MAN2C1 | Homo sapiens mannosidase, alpha, class 2C, member 1 (MAN2C1), mRNA [NM_006715] | 4123  |

|              |       |      |      |      |       |                                                                          |       |
|--------------|-------|------|------|------|-------|--------------------------------------------------------------------------|-------|
| A_23_P258698 | -14.1 | 1.7  | -1.0 | 1.0  | MANBA | Homo sapiens mannosidase, beta A, lysosomal (MANBA), mRNA [NM_005908]    | 4126  |
| A_23_P255663 | -5.7  | -1.1 | -1.2 | -1.3 | MANEA | Homo sapiens mannosidase, endo-alpha (MANEA), mRNA [NM_024641]           | 79694 |
| A_24_P69274  | 2.7   | 2.6  | 2.6  | 2.7  | MANEA | Homo sapiens mannosidase, endo-alpha (MANEA), mRNA [NM_024641]           | 79694 |
| A_23_P163455 | 2.3   | 2.5  | 2.8  | 2.5  | MAP1A | Homo sapiens microtubule-associated protein 1A (MAP1A), mRNA [NM_002373] | 4130  |

|              |     |     |      |      |          |                                                                                                                      |       |
|--------------|-----|-----|------|------|----------|----------------------------------------------------------------------------------------------------------------------|-------|
| A_24_P879740 | 1.5 | 1.8 | 2.3  | -1.5 | MAP1B    | Homo sapiens microtubule-associated protein 1B (MAP1B), mRNA [NM_005909]                                             | 4131  |
| A_23_P154786 | 1.4 | 1.6 | -2.0 | -1.1 | MAP1LC3A | Homo sapiens microtubule-associated protein 1 light chain 3 alpha (MAP1LC3A), transcript variant 1, mRNA [NM_032514] | 84557 |
| A_23_P20248  | 2.1 | 1.3 | -1.2 | 1.7  | MAP2K1   | Homo sapiens mitogen-activated protein kinase kinase 1 (MAP2K1), mRNA [NM_002755]                                    | 5604  |

|              |     |      |      |      |        |                                                                                                         |      |
|--------------|-----|------|------|------|--------|---------------------------------------------------------------------------------------------------------|------|
| A_23_P208835 | 7.6 | 10.9 | -1.1 | 2.9  | MAP2K2 | Homo sapiens mitogen-activated protein kinase kinase 2 (MAP2K2), mRNA [NM_030662]                       | 5605 |
| A_23_P84256  | 1.0 | -1.0 | 1.0  | -6.9 | MAP2K5 | Homo sapiens mitogen-activated protein kinase kinase 5 (MAP2K5), transcript variant 2, mRNA [NM_002757] | 5607 |
| A_24_P356130 | 2.1 | 1.7  | 2.3  | 1.6  | MAP2K5 | Homo sapiens mitogen-activated protein kinase kinase 5 (MAP2K5), transcript variant 2, mRNA [NM_002757] | 5607 |

|              |      |      |      |      |        |                                                                                           |      |
|--------------|------|------|------|------|--------|-------------------------------------------------------------------------------------------|------|
| A_23_P207445 | 1.2  | -5.4 | 1.1  | 1.1  | MAP2K6 | Homo sapiens mitogen-activated protein kinase kinase 6 (MAP2K6), mRNA [NM_002758]         | 5608 |
| A_24_P313895 | -1.4 | -1.2 | -1.6 | -3.1 | MAP2K7 | mitogen-activated protein kinase kinase 7 [Source:HGNC Symbol;Acc:6847] [ENST00000475022] | 5609 |
| A_23_P78628  | 1.4  | 1.4  | 2.2  | 1.1  | MAP2K7 | Homo sapiens mitogen-activated protein kinase kinase 7 (MAP2K7), mRNA [NM_145185]         | 5609 |
| A_23_P41796  | 1.2  | 1.1  | -2.7 | 1.1  | MAP3K1 | Homo sapiens mitogen-activated protein kinase kinase kinase 1 (MAP3K1), mRNA [NM_005921]  | 4214 |

|              |      |      |      |      |         |                                                                                                                  |      |
|--------------|------|------|------|------|---------|------------------------------------------------------------------------------------------------------------------|------|
| A_23_P98275  | 3.1  | 2.1  | 1.9  | 1.7  | MAP3K11 | Homo sapiens mitogen-activated protein kinase kinase kinase 11 (MAP3K11), mRNA [NM_002419]                       | 4296 |
| A_23_P105409 | 1.1  | -3.2 | -1.2 | -1.6 | MAP3K12 | Homo sapiens mitogen-activated protein kinase kinase kinase 12 (MAP3K12), transcript variant 2, mRNA [NM_006301] | 7786 |
| A_24_P85537  | -1.0 | -1.0 | -2.2 | -1.0 | MAP3K13 | Homo sapiens mitogen-activated protein kinase kinase kinase 13 (MAP3K13), transcript variant 1, mRNA [NM_004721] | 9175 |

|              |      |      |      |      |         |                                                                                                                |      |
|--------------|------|------|------|------|---------|----------------------------------------------------------------------------------------------------------------|------|
| A_23_P207319 | 2.9  | 1.8  | 3.1  | 1.8  | MAP3K14 | Homo sapiens mitogen-activated protein kinase kinase kinase 14 (MAP3K14), mRNA [NM_003954]                     | 9020 |
| A_23_P207138 | 2.8  | 2.7  | 2.3  | -1.2 | MAP3K3  | Homo sapiens mitogen-activated protein kinase kinase kinase 3 (MAP3K3), transcript variant 1, mRNA [NM_203351] | 4215 |
| A_23_P42096  | -3.5 | -1.4 | -1.0 | -1.8 | MAP3K4  | Homo sapiens mitogen-activated protein kinase kinase kinase 4 (MAP3K4), transcript variant 1, mRNA [NM_005922] | 4216 |

|              |     |     |     |     |        |                                                                                                                |      |
|--------------|-----|-----|-----|-----|--------|----------------------------------------------------------------------------------------------------------------|------|
| A_24_P145653 | 2.8 | 5.6 | 2.1 | 1.0 | MAP3K6 | Homo sapiens mitogen-activated protein kinase kinase kinase 6 (MAP3K6), mRNA [NM_004672]                       | 9064 |
| A_23_P500773 | 4.6 | 4.3 | 4.1 | 4.2 | MAP3K7 | Homo sapiens mitogen-activated protein kinase kinase kinase 7 (MAP3K7), transcript variant A, mRNA [NM_003188] | 6885 |
| A_23_P211814 | 1.0 | 1.0 | 2.0 | 1.1 | MAP4   | Homo sapiens microtubule-associated protein 4 (MAP4), transcript variant 1, mRNA [NM_002375]                   | 4134 |



|              |      |      |      |      |        |                                                                                                                |       |
|--------------|------|------|------|------|--------|----------------------------------------------------------------------------------------------------------------|-------|
| A_24_P287075 | -1.1 | 1.1  | -2.5 | -4.6 | MAP4K2 | Homo sapiens mitogen-activated protein kinase kinase kinase 2 (MAP4K2), mRNA [NM_004579]                       | 5871  |
| A_23_P205646 | -3.4 | -1.2 | -2.7 | -1.3 | MAP4K5 | Homo sapiens mitogen-activated protein kinase kinase kinase 5 (MAP4K5), transcript variant 2, mRNA [NM_198794] | 11183 |
| A_23_P350491 | -3.5 | -1.0 | -1.9 | -1.0 | MAP4K5 | Homo sapiens mitogen-activated protein kinase kinase kinase 5 (MAP4K5), transcript variant 2, mRNA [NM_198794] | 11183 |

|              |      |      |      |      |        |                                                                                                                |       |
|--------------|------|------|------|------|--------|----------------------------------------------------------------------------------------------------------------|-------|
| A_24_P16997  | -1.0 | -1.0 | -3.4 | 1.1  | MAP4K5 | Homo sapiens mitogen-activated protein kinase kinase kinase 5 (MAP4K5), transcript variant 2, mRNA [NM_198794] | 11183 |
| A_23_P47728  | 1.9  | 3.9  | 2.6  | 5.3  | MAP6   | Homo sapiens microtubule-associated protein 6 (MAP6), transcript variant 1, mRNA [NM_033063]                   | 4135  |
| A_24_P388593 | 3.1  | 1.3  | 1.3  | -1.2 | MAP6D1 | Homo sapiens MAP6 domain containing 1 (MAP6D1), mRNA [NM_024871]                                               | 79929 |

|              |      |      |      |      |        |                                                                                              |        |
|--------------|------|------|------|------|--------|----------------------------------------------------------------------------------------------|--------|
| A_32_P190416 | 1.4  | 2.1  | -1.3 | 1.9  | MAP7   | Homo sapiens microtubule-associated protein 7 (MAP7), transcript variant 4, mRNA [NM_003980] | 9053   |
| A_23_P149075 | 1.5  | 3.3  | 1.7  | 2.1  | MAP7D1 | Homo sapiens MAP7 domain containing 1 (MAP7D1), mRNA [NM_018067]                             | 55700  |
| A_24_P7652   | -2.4 | -2.5 | -4.9 | -2.3 | MAP7D2 | Homo sapiens MAP7 domain containing 2 (MAP7D2), transcript variant 2, mRNA [NM_152780]       | 256714 |
| A_23_P11160  | -4.4 | 1.0  | -1.2 | -1.4 | MAP7D3 | Homo sapiens MAP7 domain containing 3 (MAP7D3), transcript variant 1, mRNA [NM_024597]       | 79649  |

|              |      |      |      |      |        |                                                                                                   |      |
|--------------|------|------|------|------|--------|---------------------------------------------------------------------------------------------------|------|
| A_23_P45025  | 2.2  | 2.1  | 2.0  | 2.0  | MAPK10 | Homo sapiens mitogen-activated protein kinase 10 (MAPK10), transcript variant 3, mRNA [NM_138980] | 5602 |
| A_24_P283288 | 1.6  | 2.0  | 2.1  | 1.5  | MAPK14 | Homo sapiens mitogen-activated protein kinase 14 (MAPK14), transcript variant 3, mRNA [NM_139013] | 1432 |
| A_24_P397566 | -4.8 | -1.1 | -1.1 | -1.0 | MAPK14 | Homo sapiens mitogen-activated protein kinase 14 (MAPK14), transcript variant 3, mRNA [NM_139013] | 1432 |

|             |     |     |      |      |           |                                                                                                          |        |
|-------------|-----|-----|------|------|-----------|----------------------------------------------------------------------------------------------------------|--------|
| A_23_P60962 | 1.7 | 2.1 | 1.3  | -5.8 | MAPK15    | Homo sapiens mitogen-activated protein kinase 15 (MAPK15), mRNA [NM_139021]                              | 225689 |
| A_24_P89835 | 2.2 | 1.3 | -1.0 | -1.0 | MAPK15    | Homo sapiens mitogen-activated protein kinase 15 (MAPK15), mRNA [NM_139021]                              | 225689 |
| A_32_P7823  | 5.8 | 5.8 | 5.5  | 3.4  | MAPK1IP1L | Homo sapiens mitogen-activated protein kinase 1 interacting protein 1-like (MAPK1IP1L), mRNA [NM_144578] | 93487  |
| A_23_P3204  | 1.4 | 3.1 | 1.8  | 1.6  | MAPK6     | Homo sapiens mitogen-activated protein kinase 6 (MAPK6), mRNA [NM_002748]                                | 5597   |

|              |      |      |      |      |          |                                                                                                                             |       |
|--------------|------|------|------|------|----------|-----------------------------------------------------------------------------------------------------------------------------|-------|
| A_24_P286898 | 1.1  | -3.9 | 1.1  | -2.0 | MAPK8    | mitogen-activated protein kinase 8<br>[Source:HGNC Symbol;Acc:6881]<br>[ENST00000374189]                                    | 5599  |
| A_24_P409595 | -6.6 | 1.4  | -1.5 | -1.0 | MAPK8IP1 | Homo sapiens mitogen-activated protein kinase 8 interacting protein 1 (MAPK8IP1), mRNA<br>[NM_005456]                       | 9479  |
| A_23_P502078 | 2.6  | 1.1  | 3.6  | 2.0  | MAPK8IP2 | Homo sapiens mitogen-activated protein kinase 8 interacting protein 2 (MAPK8IP2), transcript variant 1, mRNA<br>[NM_012324] | 23542 |

|              |      |      |      |      |          |                                                                                                                          |       |
|--------------|------|------|------|------|----------|--------------------------------------------------------------------------------------------------------------------------|-------|
| A_23_P329727 | 2.3  | 2.2  | 2.0  | 1.6  | MAPK8IP3 | Homo sapiens mitogen-activated protein kinase 8 interacting protein 3 (MAPK8IP3), transcript variant 1, mRNA [NM_015133] | 23162 |
| A_23_P167692 | -5.3 | -5.0 | -8.7 | 1.2  | MAPK9    | Homo sapiens mitogen-activated protein kinase 9 (MAPK9), transcript variant JNK2-a2, mRNA [NM_002752]                    | 5601  |
| A_24_P43884  | -1.6 | -1.8 | -1.9 | -2.2 | MAPKAP1  | Homo sapiens mitogen-activated protein kinase associated protein 1 (MAPKAP1), transcript variant 1, mRNA [NM_001006617]  | 79109 |

|              |       |      |      |      |          |                                                                                                                             |       |
|--------------|-------|------|------|------|----------|-----------------------------------------------------------------------------------------------------------------------------|-------|
| A_23_P201483 | 3.5   | 1.1  | 1.8  | 1.9  | MAPKAPK2 | Homo sapiens mitogen-activated protein kinase-activated protein kinase 2 (MAPKAPK2), transcript variant 1, mRNA [NM_004759] | 9261  |
| A_23_P314584 | -3.9  | -1.9 | -1.5 | -1.6 | MAPKAPK3 | Homo sapiens mitogen-activated protein kinase-activated protein kinase 3 (MAPKAPK3), transcript variant 3, mRNA [NM_004635] | 7867  |
| A_24_P220058 | -69.4 | -1.0 | -1.0 | -1.1 | MAPRE1   | Homo sapiens microtubule-associated protein, RP/EB family, member 1 (MAPRE1), mRNA [NM_012325]                              | 22919 |



|              |     |      |      |      |        |                                                                                                                      |       |
|--------------|-----|------|------|------|--------|----------------------------------------------------------------------------------------------------------------------|-------|
| A_23_P418015 | 1.0 | -2.8 | -1.1 | -1.1 | MAPRE2 | Homo sapiens microtubule-associated protein, RP/EB family, member 2 (MAPRE2), transcript variant 1, mRNA [NM_014268] | 10982 |
| A_23_P131683 | 4.0 | 3.9  | 3.7  | 3.9  | MAPRE3 | Homo sapiens microtubule-associated protein, RP/EB family, member 3 (MAPRE3), mRNA [NM_012326]                       | 22924 |
| A_23_P101992 | 1.6 | 1.7  | 1.6  | 2.2  | MARCO  | Homo sapiens macrophage receptor with collagenous structure (MARCO), mRNA [NM_006770]                                | 8685  |

|              |      |      |      |      |          |                                                                                                           |        |
|--------------|------|------|------|------|----------|-----------------------------------------------------------------------------------------------------------|--------|
| A_23_P161595 | 1.5  | 2.5  | 1.5  | 1.5  | MARK2    | Homo sapiens MAP/microtubule affinity-regulating kinase 2 (MARK2), transcript variant 1, mRNA [NM_017490] | 2011   |
| A_23_P140111 | 2.1  | 2.1  | 2.0  | -1.4 | MARK3    | Homo sapiens MAP/microtubule affinity-regulating kinase 3 (MARK3), transcript variant 3, mRNA [NM_002376] | 4140   |
| A_24_P175909 | -1.6 | 1.3  | -1.6 | -2.2 | MARS     | Homo sapiens methionyl-tRNA synthetase (MARS), mRNA [NM_004990]                                           | 4141   |
| A_24_P106363 | -1.3 | -1.4 | -4.3 | -2.2 | MARVELD2 | Homo sapiens MARVEL domain containing 2 (MARVELD2), transcript variant 1, mRNA [NM_001038603]             | 153562 |

|              |      |      |      |      |          |                                                                                            |        |
|--------------|------|------|------|------|----------|--------------------------------------------------------------------------------------------|--------|
| A_23_P152428 | 1.0  | 1.0  | -3.0 | 1.0  | MARVELD3 | Homo sapiens MARVEL domain containing 3 (MARVELD3), transcript variant 2, mRNA [NM_052858] | 91862  |
| A_23_P168339 | -1.0 | -4.0 | -1.0 | -1.0 | MAS1     | Homo sapiens MAS1 oncogene (MAS1), mRNA [NM_002377]                                        | 4142   |
| A_23_P214565 | -1.2 | -1.5 | -2.6 | -2.4 | MAS1L    | Homo sapiens MAS1 oncogene-like (MAS1L), mRNA [NM_052967]                                  | 116511 |

|              |      |      |      |      |       |                                                                                                                                                       |       |
|--------------|------|------|------|------|-------|-------------------------------------------------------------------------------------------------------------------------------------------------------|-------|
| A_23_P212263 | -1.0 | -3.4 | -1.0 | -1.0 | MASP1 | Homo sapiens mannan-binding lectin serine peptidase 1 (C4/C2 activating component of Reactive factor) (MASP1), transcript variant 2, mRNA [NM_139125] | 5648  |
| A_23_P85672  | -1.4 | -1.8 | -1.7 | -2.9 | MASP2 | Homo sapiens mannan-binding lectin serine peptidase 2 (MASP2), transcript variant 1, mRNA [NM_006610]                                                 | 10747 |
| A_23_P301971 | 2.9  | 1.1  | -1.1 | -1.0 | MASP2 | Homo sapiens mannan-binding lectin serine peptidase 2 (MASP2), transcript variant 2, mRNA [NM_139208]                                                 | 10747 |

|              |      |      |      |      |       |                                                                                                                                |        |
|--------------|------|------|------|------|-------|--------------------------------------------------------------------------------------------------------------------------------|--------|
| A_23_P126008 | 1.1  | -8.2 | 1.3  | 1.0  | MAST2 | Homo sapiens microtubule associated serine/threonine kinase 2 (MAST2), mRNA [NM_015112]                                        | 23139  |
| A_23_P426196 | 15.7 | 9.9  | 15.4 | 12.8 | MAST3 | Homo sapiens microtubule associated serine/threonine kinase 3 (MAST3), mRNA [NM_015016]                                        | 23031  |
| A_23_P110571 | 1.4  | -4.9 | -1.3 | 2.0  | MAST4 | Homo sapiens microtubule associated serine/threonine kinase family member 4 (MAST4), transcript variant 3, mRNA [NM_001164664] | 375449 |

|              |      |      |      |      |       |                                                                                                                  |       |
|--------------|------|------|------|------|-------|------------------------------------------------------------------------------------------------------------------|-------|
| A_24_P258051 | -1.0 | -1.1 | -2.2 | -1.0 | MASTL | Homo sapiens microtubule associated serine/threonine kinase-like (MASTL), transcript variant 2, mRNA [NM_032844] | 84930 |
| A_23_P23996  | -1.9 | -2.2 | -2.2 | -4.2 | MAT1A | Homo sapiens methionine adenosyltransferase I, alpha (MAT1A), mRNA [NM_000429]                                   | 4143  |
| A_32_P902988 | 1.7  | 2.0  | 2.2  | 1.1  | MATN1 | Homo sapiens matrilin 1, cartilage matrix protein (MATN1), mRNA [NM_002379]                                      | 4146  |
| A_23_P97677  | 1.3  | -3.1 | -1.4 | 1.0  | MATN1 | Homo sapiens matrilin 1, cartilage matrix protein (MATN1), mRNA [NM_002379]                                      | 4146  |

|             |      |      |      |      |       |                                                                                           |       |
|-------------|------|------|------|------|-------|-------------------------------------------------------------------------------------------|-------|
| A_23_P70047 | -2.6 | -2.0 | -1.1 | -2.7 | MATR3 | Homo sapiens matrin 3 (MATR3), transcript variant 1, mRNA [NM_199189]                     | 9782  |
| A_32_P8361  | 1.3  | 1.2  | 1.1  | -5.3 | MAU2  | Homo sapiens MAU2 chromatid cohesion factor homolog (C. elegans) (MAU2), mRNA [NM_015329] | 23383 |
| A_32_P8365  | -1.1 | 2.0  | 1.6  | -1.1 | MAU2  | Homo sapiens MAU2 chromatid cohesion factor homolog (C. elegans) (MAU2), mRNA [NM_015329] | 23383 |

|              |      |     |     |     |      |                                                                                                                                                    |       |
|--------------|------|-----|-----|-----|------|----------------------------------------------------------------------------------------------------------------------------------------------------|-------|
| A_23_P68539  | 1.1  | 2.2 | 1.2 | 1.0 | MAVS | Homo sapiens mitochondrial antiviral signaling protein (MAVS), nuclear gene encoding mitochondrial protein, transcript variant 1, mRNA [NM_020746] | 57506 |
| A_23_P205549 | 3.2  | 4.1 | 3.3 | 1.7 | MAX  | Homo sapiens MYC associated factor X (MAX), transcript variant 3, mRNA [NM_145113]                                                                 | 4149  |
| A_23_P436138 | -4.7 | 1.1 | 1.1 | 1.1 | MAX  | Homo sapiens MYC associated factor X (MAX), transcript variant 4, mRNA [NM_145114]                                                                 | 4149  |



|              |      |      |     |     |        |                                                                                                 |        |
|--------------|------|------|-----|-----|--------|-------------------------------------------------------------------------------------------------|--------|
| A_24_P917178 | 6.4  | 3.8  | 2.1 | 4.1 | MB     | myoglobin<br>[Source:HGNC<br>Symbol;Accession:6915]<br>[ENST00000472240]                        | 4151   |
| A_32_P1173   | -2.6 | 1.8  | 1.8 | 1.0 | MB21D1 | Homo sapiens Mab-21 domain containing 1 (MB21D1), mRNA [NM_138441]                              | 115004 |
| A_23_P326963 | -2.5 | -1.2 | 1.4 | 1.2 | MB21D2 | Homo sapiens Mab-21 domain containing 2 (MB21D2), mRNA [NM_178496]                              | 151963 |
| A_24_P185347 | 1.3  | 2.5  | 1.5 | 1.2 | MBD1   | Homo sapiens methyl-CpG binding domain protein 1 (MBD1), transcript variant 2, mRNA [NM_015845] | 4152   |

|              |      |      |      |      |        |                                                                                                 |       |
|--------------|------|------|------|------|--------|-------------------------------------------------------------------------------------------------|-------|
| A_32_P107777 | -2.1 | -1.3 | 1.1  | -1.9 | MBD2   | Homo sapiens methyl-CpG binding domain protein 2 (MBD2), transcript variant 1, mRNA [NM_003927] | 8932  |
| A_23_P50839  | -1.2 | -4.1 | -2.1 | -2.1 | MBD3   | Homo sapiens methyl-CpG binding domain protein 3 (MBD3), mRNA [NM_003926]                       | 53615 |
| A_23_P415395 | 1.1  | -4.1 | -1.5 | -1.5 | MBD3L1 | Homo sapiens methyl-CpG binding domain protein 3-like 1 (MBD3L1), mRNA [NM_145208]              | 85509 |

|              |      |       |      |      |       |                                                                                                   |       |
|--------------|------|-------|------|------|-------|---------------------------------------------------------------------------------------------------|-------|
| A_23_P142537 | 20.0 | 19.7  | 17.3 | 19.9 | MBD5  | Homo sapiens methyl-CpG binding domain protein 5, mRNA (cDNA clone IMAGE:3996924). [BC014534]     | 55777 |
| A_23_P2922   | -1.0 | -2.9  | -2.2 | -1.1 | MBIP  | Homo sapiens MAP3K12 binding inhibitory protein 1 (MBIP), transcript variant 1, mRNA [NM_016586]  | 51562 |
| A_24_P169634 | 1.0  | -39.5 | -1.1 | -1.2 | MBL1P | Homo sapiens mannose-binding lectin (protein A) 1, pseudogene (MBL1P), non-coding RNA [NR_002724] | 8512  |

|              |      |      |      |      |        |                                                                                             |        |
|--------------|------|------|------|------|--------|---------------------------------------------------------------------------------------------|--------|
| A_24_P221198 | -1.1 | -1.1 | -1.1 | -2.1 | MBLAC1 | Homo sapiens metallo-beta-lactamase domain containing 1 (MBLAC1), mRNA [NM_203397]          | 255374 |
| A_23_P390876 | -3.6 | 1.0  | -5.7 | -1.0 | MBLAC2 | metallo-beta-lactamase domain containing 2 [Source:HGNC Symbol;Acc:33711] [ENST00000514906] | 153364 |
| A_24_P128057 | 1.7  | 2.2  | 1.5  | 1.2  | MBNL1  | Homo sapiens muscleblind-like (Drosophila), mRNA (cDNA clone IMAGE:3935812). [BC005296]     | 4154   |

|              |      |     |      |      |        |                                                                                                                    |       |
|--------------|------|-----|------|------|--------|--------------------------------------------------------------------------------------------------------------------|-------|
| A_32_P123788 | 2.1  | 1.6 | 2.0  | 1.2  | MBOAT7 | Homo sapiens membrane bound O-acyltransferase domain containing 7 (MBOAT7), transcript variant 1, mRNA [NM_024298] | 79143 |
| A_23_P208085 | -1.2 | 1.3 | -2.4 | -1.2 | MBP    | Homo sapiens myelin basic protein (MBP), transcript variant 7, mRNA [NM_001025101]                                 | 4155  |
| A_24_P935437 | -1.4 | 1.1 | -3.6 | 1.1  | MBP    | myelin basic protein [Source:HGNC Symbol;Acc:6925] [ENST00000490319]                                               | 4155  |
| A_32_P58937  | -3.5 | 1.7 | -1.0 | -1.1 | MBTD1  | Homo sapiens mbt domain containing 1 (MBTD1), mRNA [NM_017643]                                                     | 54799 |

|              |      |      |      |      |        |                                                                                                               |       |
|--------------|------|------|------|------|--------|---------------------------------------------------------------------------------------------------------------|-------|
| A_23_P14946  | -3.0 | 1.1  | 1.1  | -1.0 | MBTPS1 | Homo sapiens membrane-bound transcription factor peptidase, site 1 (MBTPS1), mRNA [NM_003791]                 | 8720  |
| A_23_P114095 | 9.8  | 6.6  | -1.0 | 5.8  | MBTPS2 | Homo sapiens membrane-bound transcription factor peptidase, site 2 (MBTPS2), mRNA [NM_015884]                 | 51360 |
| A_23_P66095  | -3.4 | -1.2 | 1.7  | 1.8  | MC1R   | Homo sapiens melanocortin 1 receptor (alpha melanocyte stimulating hormone receptor) (MC1R), mRNA [NM_002386] | 4157  |

|              |      |     |      |      |        |                                                                                                                                                  |       |
|--------------|------|-----|------|------|--------|--------------------------------------------------------------------------------------------------------------------------------------------------|-------|
| A_23_P258525 | -1.0 | 1.0 | -9.2 | -1.1 | MC3R   | Homo sapiens melanocortin 3 receptor (MC3R), mRNA [NM_019888]                                                                                    | 4159  |
| A_23_P50039  | 1.6  | 2.0 | 3.3  | 1.2  | MC5R   | Homo sapiens melanocortin 5 receptor (MC5R), mRNA [NM_005913]                                                                                    | 4161  |
| A_24_P326660 | 6.2  | 6.0 | 5.5  | 5.9  | MCAM   | Homo sapiens melanoma cell adhesion molecule (MCAM), mRNA [NM_006500]                                                                            | 4162  |
| A_23_P112512 | -1.7 | 3.8 | 3.4  | 1.8  | MCART1 | Homo sapiens mitochondrial carrier triple repeat 1 (MCART1), nuclear gene encoding mitochondrial protein, transcript variant 1, mRNA [NM_033412] | 92014 |

|              |      |     |     |     |       |                                                                                                                                                          |        |
|--------------|------|-----|-----|-----|-------|----------------------------------------------------------------------------------------------------------------------------------------------------------|--------|
| A_23_P132358 | -1.9 | 1.5 | 2.4 | 1.2 | MCAT  | Homo sapiens malonyl CoA:ACP acyltransferase (mitochondrial) (MCAT), nuclear gene encoding mitochondrial protein, transcript variant 1, mRNA [NM_173467] | 27349  |
| A_32_P20439  | 2.6  | 2.3 | 1.0 | 1.8 | MCCD1 | Homo sapiens mitochondrial coiled-coil domain 1 (MCCD1), nuclear gene encoding mitochondrial protein, mRNA [NM_001011700]                                | 401250 |



|              |      |      |      |      |       |                                                                                                                           |        |
|--------------|------|------|------|------|-------|---------------------------------------------------------------------------------------------------------------------------|--------|
| A_23_P133904 | -2.7 | -1.9 | -1.4 | -2.7 | MCCD1 | Homo sapiens mitochondrial coiled-coil domain 1 (MCCD1), nuclear gene encoding mitochondrial protein, mRNA [NM_001011700] | 401250 |
| A_23_P211543 | 1.0  | -7.4 | -1.0 | 1.1  | MCHR1 | Homo sapiens melanin-concentrating hormone receptor 1 (MCHR1), mRNA [NM_005297]                                           | 2847   |
| A_24_P98006  | -1.6 | 1.2  | -1.2 | -4.5 | MCHR2 | Homo sapiens melanin-concentrating hormone receptor 2 (MCHR2), transcript variant 1, mRNA [NM_001040179]                  | 84539  |

|              |      |     |     |      |            |                                                                                                          |        |
|--------------|------|-----|-----|------|------------|----------------------------------------------------------------------------------------------------------|--------|
| A_23_P156784 | -1.3 | 1.0 | 1.0 | -4.9 | MCHR2      | Homo sapiens melanin-concentrating hormone receptor 2 (MCHR2), transcript variant 1, mRNA [NM_001040179] | 84539  |
| A_32_P103633 | 2.4  | 1.6 | 2.8 | 2.7  | MCM2       | Homo sapiens minichromosome maintenance complex component 2 (MCM2), mRNA [NM_004526]                     | 4171   |
| A_24_P117301 | -1.7 | 1.5 | 2.7 | -3.7 | MCM3AP-AS1 | Homo sapiens MCM3AP antisense RNA 1 (non-protein coding) (MCM3AP-AS1), antisense RNA [NR_002776]         | 114044 |

|              |     |      |      |      |            |                                                                                                  |        |
|--------------|-----|------|------|------|------------|--------------------------------------------------------------------------------------------------|--------|
| A_23_P256694 | 1.2 | 1.5  | -2.0 | -1.1 | MCM3AP-AS1 | Homo sapiens MCM3AP antisense RNA 1 (non-protein coding) (MCM3AP-AS1), antisense RNA [NR_002776] | 114044 |
| A_23_P132277 | 1.0 | 2.2  | -2.3 | -1.7 | MCM5       | Homo sapiens minichromosome maintenance complex component 5 (MCM5), mRNA [NM_006739]             | 4174   |
| A_23_P90612  | 1.1 | -2.7 | 1.0  | 1.0  | MCM6       | Homo sapiens minichromosome maintenance complex component 6 (MCM6), mRNA [NM_005915]             | 4175   |

|              |      |      |      |      |        |                                                                                                            |       |
|--------------|------|------|------|------|--------|------------------------------------------------------------------------------------------------------------|-------|
| A_23_P68547  | 1.0  | 1.0  | -2.6 | 1.2  | MCM8   | Homo sapiens minichromosome maintenance complex component 8 (MCM8), transcript variant 2, mRNA [NM_182802] | 84515 |
| A_23_P12241  | -1.1 | -1.1 | -2.1 | 10.4 | MCOLN3 | Homo sapiens mucolipin 3 (MCOLN3), mRNA [NM_018298]                                                        | 55283 |
| A_24_P170936 | 2.9  | 1.8  | 1.3  | 1.4  | MCPH1  | Homo sapiens microcephalin 1 (MCPH1), transcript variant 2, mRNA [NM_001172574]                            | 79648 |
| A_24_P212481 | 1.6  | 1.1  | -2.6 | -1.0 | MCTP1  | Homo sapiens multiple C2 domains, transmembrane 1 (MCTP1), transcript variant L, mRNA [NM_024717]          | 79772 |

|              |      |      |      |      |       |                                                                                                    |       |
|--------------|------|------|------|------|-------|----------------------------------------------------------------------------------------------------|-------|
| A_23_P65789  | -2.0 | -1.9 | -2.0 | -1.8 | MCTP2 | Homo sapiens multiple C2 domains, transmembrane 2 (MCTP2), transcript variant 1, mRNA [NM_018349]  | 55784 |
| A_23_P114282 | -1.5 | -1.9 | -5.8 | -8.2 | MCTS1 | Homo sapiens malignant T cell amplified sequence 1 (MCTS1), transcript variant 1, mRNA [NM_014060] | 28985 |
| A_24_P392280 | -1.1 | -1.0 | -3.0 | -1.1 | MCTS1 | Homo sapiens malignant T cell amplified sequence 1 (MCTS1), transcript variant 1, mRNA [NM_014060] | 28985 |

|              |      |      |      |      |       |                                                                                                                   |       |
|--------------|------|------|------|------|-------|-------------------------------------------------------------------------------------------------------------------|-------|
| A_24_P808100 | -1.8 | -1.0 | -1.1 | -2.7 | MCTS1 | Homo sapiens malignant T cell amplified sequence 1 (MCTS1), transcript variant 1, mRNA [NM_014060]                | 28985 |
| A_23_P346405 | 2.1  | 2.0  | 1.8  | 1.9  | MCU   | Homo sapiens mitochondrial calcium uniporter (MCU), nuclear gene encoding mitochondrial protein, mRNA [NM_138357] | 90550 |
| A_23_P42168  | 1.4  | 2.2  | 1.9  | 2.0  | MDFI  | Homo sapiens MyoD family inhibitor (MDFI), mRNA [NM_005586]                                                       | 4188  |

|              |      |      |      |      |       |                                                                                                      |        |
|--------------|------|------|------|------|-------|------------------------------------------------------------------------------------------------------|--------|
| A_32_P120567 | 1.1  | 1.4  | -2.8 | -1.2 | MDFIC | Homo sapiens MyoD family inhibitor domain containing (MDFIC), transcript variant 1, mRNA [NM_199072] | 29969  |
| A_24_P314640 | -1.5 | 6.2  | 2.1  | 2.5  | MDGA1 | Homo sapiens MAM domain containing glycosylphosphatidylinositol anchor 1 (MDGA1), mRNA [NM_153487]   | 266727 |
| A_24_P46808  | -3.9 | -2.4 | -1.3 | -1.3 | MDH2  | malate dehydrogenase 2, NAD (mitochondrial) [Source:HGNC Symbol;Acc:6971] [ENST00000315758]          | 4191   |

|              |      |     |      |      |      |                                                                                                                                |      |
|--------------|------|-----|------|------|------|--------------------------------------------------------------------------------------------------------------------------------|------|
| A_23_P31372  | -2.8 | 1.0 | -2.1 | 1.7  | MDH2 | Homo sapiens malate dehydrogenase 2, NAD (mitochondrial) (MDH2), nuclear gene encoding mitochondrial protein, mRNA [NM_005918] | 4191 |
| A_23_P309545 | 2.5  | 1.0 | 2.2  | 3.1  | MDM2 | Homo sapiens Mdm2 p53 binding protein homolog (mouse) (MDM2), transcript variant MDM2, mRNA [NM_002392]                        | 4193 |
| A_24_P778649 | 1.8  | 1.7 | 2.5  | -1.8 | MDM4 | Homo sapiens Mdm4 p53 binding protein homolog (mouse) (MDM4), transcript variant 1, mRNA [NM_002393]                           | 4194 |



|              |     |      |      |      |      |                                                                                                                                                         |       |
|--------------|-----|------|------|------|------|---------------------------------------------------------------------------------------------------------------------------------------------------------|-------|
| A_23_P365060 | 1.1 | -3.2 | -1.0 | 1.0  | MDN1 | Homo sapiens MDN1, midasin homolog (yeast) (MDN1), mRNA [NM_014611]                                                                                     | 23195 |
| A_23_P321261 | 1.2 | -2.0 | 1.0  | -2.2 | ME2  | Homo sapiens malic enzyme 2, NAD(+)-dependent, mitochondrial (ME2), nuclear gene encoding mitochondrial protein, transcript variant 1, mRNA [NM_002396] | 4200  |

|              |      |      |      |      |       |                                                                                                                                                             |       |
|--------------|------|------|------|------|-------|-------------------------------------------------------------------------------------------------------------------------------------------------------------|-------|
| A_23_P105227 | -1.2 | -2.0 | -1.4 | -2.7 | ME3   | Homo sapiens malic enzyme 3, NADP(+)-dependent, mitochondrial (ME3), nuclear gene encoding mitochondrial protein, transcript variant 2, mRNA [NM_001014811] | 10873 |
| A_23_P30745  | -1.3 | 1.1  | 1.1  | -3.3 | MEA1  | Homo sapiens male-enhanced antigen 1 (MEA1), mRNA [NM_014623]                                                                                               | 4201  |
| A_23_P317324 | 1.8  | 1.8  | 1.0  | -2.0 | MECOM | Homo sapiens MDS1 and EVI1 complex locus (MECOM), transcript variant 2, mRNA [NM_005241]                                                                    | 2122  |

|              |      |      |       |      |       |                                                                                             |      |
|--------------|------|------|-------|------|-------|---------------------------------------------------------------------------------------------|------|
| A_24_P320103 | -4.6 | 1.1  | 1.1   | 1.1  | MECOM | Homo sapiens MDS1 and EVI1 complex locus (MECOM), transcript variant 4, mRNA [NM_004991]    | 2122 |
| A_24_P153490 | -2.2 | 1.1  | 1.0   | 1.0  | MECOM | Homo sapiens MDS1 and EVI1 complex locus (MECOM), transcript variant 6, mRNA [NM_001164000] | 2122 |
| A_23_P212688 | 1.3  | -1.1 | -19.5 | -1.1 | MECOM | Homo sapiens MDS1 and EVI1 complex locus (MECOM), transcript variant 2, mRNA [NM_005241]    | 2122 |

|              |      |     |      |      |       |                                                                                                                                                       |       |
|--------------|------|-----|------|------|-------|-------------------------------------------------------------------------------------------------------------------------------------------------------|-------|
| A_24_P237486 | -2.1 | 1.3 | 1.3  | -1.4 | MECP2 | Homo sapiens methyl CpG binding protein 2 (Rett syndrome) (MECP2), transcript variant 1, mRNA [NM_004992]                                             | 4204  |
| A_23_P114808 | 1.3  | 2.1 | 1.1  | 1.2  | MECR  | Homo sapiens mitochondrial trans-2-enoyl-CoA reductase (MECR), nuclear gene encoding mitochondrial protein, transcript variant 2, mRNA [NM_001024732] | 51102 |
| A_23_P124024 | 1.4  | 1.3 | -1.3 | -4.1 | MED10 | Homo sapiens mediator complex subunit 10 (MED10), mRNA [NM_032286]                                                                                    | 84246 |

|              |      |      |      |      |       |                                                                             |      |
|--------------|------|------|------|------|-------|-----------------------------------------------------------------------------|------|
| A_23_P73702  | -1.4 | -2.2 | -1.5 | -1.1 | MED12 | Homo sapiens mediator complex subunit 12 (MED12), mRNA [NM_005120]          | 9968 |
| A_23_P27247  | -2.1 | -4.6 | -3.9 | -4.2 | MED13 | Homo sapiens mediator complex subunit 13 (MED13), mRNA [NM_005121]          | 9969 |
| A_23_P72187  | 2.0  | 2.1  | 2.1  | 1.3  | MED14 | Homo sapiens mediator complex subunit 14 (MED14), mRNA [NM_004229]          | 9282 |
| A_24_P941459 | 1.1  | -4.9 | -1.3 | 1.0  | MED17 | mediator complex subunit 17 [Source:HGNC Symbol;Acc:2375] [ENST00000530819] | 9440 |

|              |      |      |       |      |       |                                                                                          |      |
|--------------|------|------|-------|------|-------|------------------------------------------------------------------------------------------|------|
| A_23_P116025 | -5.2 | 1.0  | -1.0  | -1.0 | MED17 | Homo sapiens mediator complex subunit 17 (MED17), mRNA [NM_004268]                       | 9440 |
| A_23_P2262   | -1.0 | -1.0 | -2.3  | -1.0 | MED21 | Homo sapiens mediator complex subunit 21 (MED21), mRNA [NM_004264]                       | 9412 |
| A_23_P501795 | 4.7  | 8.4  | 9.8   | 6.7  | MED22 | Homo sapiens mediator complex subunit 22 (MED22), transcript variant b, mRNA [NM_133640] | 6837 |
| A_24_P55719  | 2.0  | 2.5  | -12.2 | 1.1  | MED22 | Homo sapiens mediator complex subunit 22 (MED22), transcript variant b, mRNA [NM_133640] | 6837 |

|              |      |     |      |     |       |                                                                    |       |
|--------------|------|-----|------|-----|-------|--------------------------------------------------------------------|-------|
| A_23_P153510 | -2.8 | 1.4 | 1.5  | 1.1 | MED25 | Homo sapiens mediator complex subunit 25 (MED25), mRNA [NM_030973] | 81857 |
| A_23_P317854 | 1.3  | 4.2 | 2.7  | 2.6 | MED26 | Homo sapiens mediator complex subunit 26 (MED26), mRNA [NM_004831] | 9441  |
| A_23_P301877 | 1.4  | 1.3 | -2.8 | 1.4 | MED27 | Homo sapiens mediator complex subunit 27 (MED27), mRNA [NM_004269] | 9442  |
| A_24_P538478 | 4.0  | 3.8 | 1.0  | 3.8 | MED28 | Homo sapiens mediator complex subunit 28 (MED28), mRNA [NM_025205] | 80306 |

|              |      |      |      |      |       |                                                                    |       |
|--------------|------|------|------|------|-------|--------------------------------------------------------------------|-------|
| A_32_P138330 | 1.1  | -1.0 | -1.1 | 5.3  | MED29 | Homo sapiens mediator complex subunit 29 (MED29), mRNA [NM_017592] | 55588 |
| A_24_P93887  | 2.1  | -2.8 | 1.6  | 2.2  | MED29 | Homo sapiens mediator complex subunit 29 (MED29), mRNA [NM_017592] | 55588 |
| A_23_P128543 | -3.4 | -1.0 | 1.2  | -1.0 | MED4  | Homo sapiens mediator complex subunit 4 (MED4), mRNA [NM_014166]   | 29079 |
| A_24_P318319 | 3.9  | 4.5  | 5.7  | 4.7  | MED6  | Homo sapiens mediator complex subunit 6 (MED6), mRNA [NM_005466]   | 10001 |



|              |      |      |       |      |       |                                                                                         |        |
|--------------|------|------|-------|------|-------|-----------------------------------------------------------------------------------------|--------|
| A_23_P46170  | 1.0  | -1.0 | 2.1   | 1.0  | MED8  | Homo sapiens mediator complex subunit 8 (MED8), transcript variant 3, mRNA [NM_052877]  | 112950 |
| A_24_P8267   | 2.8  | -1.8 | -1.6  | -1.6 | MED9  | Homo sapiens cDNA clone IMAGE:4095249, with apparent retained intron. [BC010906]        | 55090  |
| A_23_P66402  | -1.0 | -1.0 | -24.9 | -1.1 | MED9  | Homo sapiens mediator complex subunit 9 (MED9), mRNA [NM_018019]                        | 55090  |
| A_23_P353652 | 1.8  | -1.3 | -1.7  | 5.4  | MEF2A | Homo sapiens myocyte enhancer factor 2A (MEF2A), transcript variant 1, mRNA [NM_005587] | 4205   |

|              |      |      |      |      |            |                                                                                                |        |
|--------------|------|------|------|------|------------|------------------------------------------------------------------------------------------------|--------|
| A_24_P1731   | -1.3 | -2.2 | -3.4 | -3.5 | MEF2A      | Homo sapiens myocyte enhancer factor 2A (MEF2A), transcript variant 1, mRNA [NM_005587]        | 4205   |
| A_24_P914940 | 1.7  | 2.3  | -5.3 | 1.5  | MEF2BNB    | Homo sapiens MEF2B neighbor (MEF2BNB), transcript variant 1, mRNA [NM_001145784]               | 729991 |
| A_24_P31583  | 2.6  | -1.9 | -1.4 | -1.3 | MEF2BNB-ME | Homo sapiens MEF2BNB-MEF2B readthrough (MEF2BNB-MEF2B), transcript variant 1, mRNA [NM_005919] | 4207   |
| A_23_P140967 | 2.2  | 3.5  | 1.7  | -1.8 | MEFV       | Homo sapiens Mediterranean fever (MEFV), transcript variant 1, mRNA [NM_000243]                | 4210   |

|              |      |      |      |       |       |                                                                       |        |
|--------------|------|------|------|-------|-------|-----------------------------------------------------------------------|--------|
| A_24_P463973 | 5.3  | 5.2  | 5.1  | 5.0   | MEG3  | Homo sapiens cDNA FLJ41884 fis, clone OCBBF2023162. [AK123878]        | 55384  |
| A_32_P129894 | -1.2 | 1.5  | 1.5  | -2.1  | MEGF9 | Homo sapiens multiple EGF-like-domains 9 (MEGF9), mRNA [NM_001080497] | 1955   |
| A_23_P211561 | -1.3 | -1.3 | -1.4 | -11.4 | MEI1  | Homo sapiens meiosis inhibitor 1 (MEI1), mRNA [NM_152513]             | 150365 |
| A_32_P136516 | 1.4  | 2.7  | 3.1  | 1.9   | MEI1  | Homo sapiens meiosis inhibitor 1 (MEI1), mRNA [NM_152513]             | 150365 |
| A_24_P319736 | -2.8 | -2.0 | -1.5 | -1.0  | MEIS1 | Homo sapiens Meis homeobox 1 (MEIS1), mRNA [NM_002398]                | 4211   |

|              |      |      |      |      |         |                                                                                 |       |
|--------------|------|------|------|------|---------|---------------------------------------------------------------------------------|-------|
| A_24_P82200  | 1.4  | -3.3 | 2.5  | -1.7 | MEIS2   | Homo sapiens Meis homeobox 2 (MEIS2), transcript variant d, mRNA [NM_170676]    | 4212  |
| A_24_P207503 | -4.8 | -1.4 | 1.9  | -1.5 | MEIS3   | Homo sapiens Meis homeobox 3 (MEIS3), transcript variant 2, mRNA [NM_001009813] | 56917 |
| A_24_P648880 | 26.7 | 25.5 | 23.5 | 23.7 | MEIS3P1 | Homo sapiens Meis homeobox 3 pseudogene 1 (MEIS3P1), non-coding RNA [NR_002211] | 4213  |
| A_24_P154868 | 1.5  | 2.5  | 1.8  | 1.1  | MEP1A   | Homo sapiens meprin A, alpha (PABA peptide hydrolase) (MEP1A), mRNA [NM_005588] | 4224  |

|              |      |       |      |      |       |                                                                                                      |       |
|--------------|------|-------|------|------|-------|------------------------------------------------------------------------------------------------------|-------|
| A_23_P78353  | 1.1  | -17.4 | 1.0  | 1.0  | MEP1B | Homo sapiens meprin A, beta (MEP1B), mRNA [NM_005925]                                                | 4225  |
| A_24_P312189 | 1.1  | -3.4  | -1.4 | -1.5 | MEPCE | Homo sapiens methylphosphate capping enzyme (MEPCE), transcript variant 1, mRNA [NM_019606]          | 56257 |
| A_23_P155931 | -1.9 | 2.1   | -1.5 | 1.8  | MEPE  | Homo sapiens matrix extracellular phosphoglycoprotein (MEPE), transcript variant 2, mRNA [NM_020203] | 56955 |
| A_23_P32955  | -3.4 | 1.0   | 1.0  | 1.0  | MERTK | c-mer proto-oncogene tyrosine kinase [Source:HGNC Symbol;Acc:7027] [ENST00000421804]                 | 10461 |

|              |      |       |      |      |         |                                                                                                                   |        |
|--------------|------|-------|------|------|---------|-------------------------------------------------------------------------------------------------------------------|--------|
| A_24_P279121 | -2.8 | -9.6  | -5.1 | -3.9 | MESP1   | Homo sapiens mesoderm posterior 1 homolog (mouse) (MESP1), mRNA [NM_018670]                                       | 55897  |
| A_32_P83803  | -2.4 | -12.3 | -2.3 | -3.1 | MESTIT1 | Homo sapiens MEST intronic transcript 1, antisense RNA (non-protein coding) (MESTIT1), non-coding RNA [NR_004382] | 317751 |
| A_24_P226076 | 1.3  | -1.1  | -2.3 | 1.3  | METAP1  | Homo sapiens methionyl aminopeptidase 1 (METAP1), mRNA [NM_015143]                                                | 23173  |
| A_23_P155907 | 1.1  | -2.0  | 1.0  | 1.4  | METAP1  | Homo sapiens methionyl aminopeptidase 1 (METAP1), mRNA [NM_015143]                                                | 23173  |

|              |      |      |      |      |         |                                                                                                                                        |        |
|--------------|------|------|------|------|---------|----------------------------------------------------------------------------------------------------------------------------------------|--------|
| A_23_P90790  | -1.0 | -1.1 | -1.1 | -2.1 | METAP1D | Homo sapiens methionyl aminopeptidase type 1D (mitochondrial) (METAP1D), nuclear gene encoding mitochondrial protein, mRNA [NM_199227] | 254042 |
| A_24_P339201 | 1.4  | 2.1  | 1.8  | 1.7  | METRNL  | Homo sapiens meteorin, glial cell differentiation regulator (METRN), mRNA [NM_024042]                                                  | 79006  |
| A_23_P10591  | 1.3  | -1.1 | -3.7 | 1.4  | METRNL  | Homo sapiens meteorin, glial cell differentiation regulator-like (METRNL), mRNA [NM_001004431]                                         | 284207 |

|              |      |       |      |      |         |                                                                                          |        |
|--------------|------|-------|------|------|---------|------------------------------------------------------------------------------------------|--------|
| A_23_P47790  | -3.1 | -8.5  | -1.2 | -2.2 | METTL1  | Homo sapiens methyltransferase like 1 (METTL1), transcript variant 1, mRNA [NM_005371]   | 4234   |
| A_23_P47788  | 1.0  | -13.7 | 1.6  | -1.0 | METTL1  | Homo sapiens methyltransferase like 1 (METTL1), transcript variant 1, mRNA [NM_005371]   | 4234   |
| A_23_P205529 | 3.5  | 2.2   | 2.4  | 2.4  | METTL17 | Homo sapiens methyltransferase like 17 (METTL17), transcript variant 2, mRNA [NM_022734] | 64745  |
| A_23_P29985  | -1.0 | 1.1   | 1.3  | -2.3 | METTL19 | Homo sapiens cDNA FLJ12891 fis, clone NT2RP2004142. [AK022953]                           | 152992 |



|              |      |      |      |      |          |                                                                                               |        |
|--------------|------|------|------|------|----------|-----------------------------------------------------------------------------------------------|--------|
| A_23_P18590  | 1.6  | 2.3  | -1.9 | 1.8  | METTL19  | Homo sapiens methyltransferase like 19 (METTL19), transcript variant 2, mRNA [NM_152544]      | 152992 |
| A_23_P156809 | -1.6 | 1.2  | -1.3 | -2.3 | METTL21A | Homo sapiens methyltransferase like 21A (METTL21A), transcript variant 2, mRNA [NM_001127395] | 151194 |
| A_24_P162929 | -6.7 | -4.8 | -3.2 | -1.4 | METTL21A | Homo sapiens methyltransferase like 21A (METTL21A), transcript variant 1, mRNA [NM_145280]    | 151194 |
| A_24_P253078 | -7.0 | -1.0 | 1.2  | 3.3  | METTL21B | Homo sapiens methyltransferase like 21B (METTL21B), transcript variant 2, mRNA [NM_206914]    | 25895  |

|              |     |     |      |      |         |                                                                    |        |
|--------------|-----|-----|------|------|---------|--------------------------------------------------------------------|--------|
| A_23_P3885   | 1.6 | 1.2 | -4.3 | -1.4 | METTL22 | Homo sapiens methyltransferase like 22 (METTL22), mRNA [NM_024109] | 79091  |
| A_23_P15284  | 2.0 | 2.4 | 1.9  | 1.7  | METTL22 | Homo sapiens methyltransferase like 22 (METTL22), mRNA [NM_024109] | 79091  |
| A_23_P54064  | 4.6 | 7.6 | 2.1  | 3.8  | METTL3  | Homo sapiens methyltransferase like 3 (METTL3), mRNA [NM_019852]   | 56339  |
| A_23_P142634 | 3.6 | 4.2 | 2.3  | 3.2  | METTL5  | Homo sapiens methyltransferase like 5 (METTL5), mRNA [NM_014168]   | 29081  |
| A_23_P361469 | 1.5 | 1.0 | 1.0  | -4.0 | METTL6  | Homo sapiens methyltransferase like 6 (METTL6), mRNA [NM_152396]   | 131965 |

|              |      |      |      |      |        |                                                                                        |       |
|--------------|------|------|------|------|--------|----------------------------------------------------------------------------------------|-------|
| A_24_P202139 | 1.5  | -2.6 | -3.2 | -1.1 | METTL9 | Homo sapiens methyltransferase like 9 (METTL9), transcript variant 1, mRNA [NM_016025] | 51108 |
| A_23_P206347 | 2.1  | 1.1  | -1.1 | 1.0  | METTL9 | Homo sapiens methyltransferase like 9 (METTL9), transcript variant 1, mRNA [NM_016025] | 51108 |
| A_24_P112984 | -3.0 | 1.9  | 1.4  | -1.3 | METTL9 | Homo sapiens methyltransferase like 9 (METTL9), transcript variant 1, mRNA [NM_016025] | 51108 |
| A_24_P857404 | 2.1  | 1.4  | 1.3  | 1.3  | MEX3A  | Homo sapiens mex-3 homolog A (C. elegans) (MEX3A), mRNA [NM_001093725]                 | 92312 |

|              |      |      |      |      |       |                                                                                                  |        |
|--------------|------|------|------|------|-------|--------------------------------------------------------------------------------------------------|--------|
| A_24_P923765 | 2.0  | 2.0  | 1.6  | 1.4  | MEX3D | Homo sapiens mex-3 homolog D (C. elegans) (MEX3D), transcript variant 1, mRNA [NM_203304]        | 399664 |
| A_23_P39445  | -1.6 | -3.9 | 1.7  | -2.2 | MEX3D | Homo sapiens mex-3 homolog D (C. elegans) (MEX3D), transcript variant 1, mRNA [NM_203304]        | 399664 |
| A_23_P1029   | -9.5 | 1.0  | -1.1 | -1.1 | MFAP2 | Homo sapiens microfibrillar-associated protein 2 (MFAP2), transcript variant 1, mRNA [NM_017459] | 4237   |

|              |      |      |      |     |        |                                                                                                       |      |
|--------------|------|------|------|-----|--------|-------------------------------------------------------------------------------------------------------|------|
| A_23_P167711 | 1.1  | 1.0  | -2.3 | 1.0 | MFAP3  | Homo sapiens microfilament-associated protein 3 (MFAP3), transcript variant 1, mRNA [NM_005927]       | 4238 |
| A_24_P76675  | 1.4  | -1.3 | -2.7 | 1.0 | MFAP3L | Homo sapiens microfilament-associated protein 3-like (MFAP3L), transcript variant 1, mRNA [NM_021647] | 9848 |
| A_24_P133584 | 14.8 | -4.9 | -3.3 | 1.4 | MFGE8  | Homo sapiens milk fat globule-EGF factor 8 protein (MFGE8), transcript variant 1, mRNA [NM_005928]    | 4240 |

|              |      |      |      |      |       |                                                                                                                                                  |      |
|--------------|------|------|------|------|-------|--------------------------------------------------------------------------------------------------------------------------------------------------|------|
| A_23_P48951  | -1.1 | -2.1 | 1.6  | 1.6  | MFGE8 | Homo sapiens milk fat globule-EGF factor 8 protein (MFGE8), transcript variant 1, mRNA [NM_005928]                                               | 4240 |
| A_24_P924484 | 1.0  | -1.0 | -3.4 | -1.1 | MF12  | Human melanoma-associated antigen p97 (melanotransferrin) mRNA, 3' flank. [K03200]                                                               | 4241 |
| A_23_P386320 | 2.1  | 2.1  | 2.1  | 2.2  | MF12  | Homo sapiens antigen p97 (melanoma associated) identified by monoclonal antibodies 133.2 and 96.5 (MF12), transcript variant 2, mRNA [NM_033316] | 4241 |

|              |      |      |      |      |      |                                                                                                                          |       |
|--------------|------|------|------|------|------|--------------------------------------------------------------------------------------------------------------------------|-------|
| A_23_P103104 | -1.7 | -2.7 | -1.1 | -1.3 | MFNG | Homo sapiens MFNG O-fucosylpeptide 3-beta-N-acetylglucosaminyltransferase (MFNG), transcript variant 1, mRNA [NM_002405] | 4242  |
| A_24_P224926 | -1.1 | -1.1 | -1.1 | -8.5 | MFNG | Homo sapiens MFNG O-fucosylpeptide 3-beta-N-acetylglucosaminyltransferase (MFNG), transcript variant 1, mRNA [NM_002405] | 4242  |
| A_24_P98783  | 2.0  | 3.0  | 1.2  | 1.4  | MFRP | Homo sapiens membrane frizzled-related protein (MFRP), mRNA [NM_031433]                                                  | 83552 |

|              |      |      |      |      |        |                                                                                                                  |       |
|--------------|------|------|------|------|--------|------------------------------------------------------------------------------------------------------------------|-------|
| A_23_P166677 | -2.3 | 1.0  | 1.0  | 1.0  | MFSD1  | Homo sapiens major facilitator superfamily domain containing 1 (MFSD1), transcript variant 1, mRNA [NM_022736]   | 64747 |
| A_23_P41246  | 2.1  | -1.4 | 1.8  | 1.9  | MFSD10 | Homo sapiens major facilitator superfamily domain containing 10 (MFSD10), transcript variant 1, mRNA [NM_001120] | 10227 |
| A_23_P43820  | -1.0 | -1.5 | -3.3 | -1.9 | MFSD2A | Homo sapiens major facilitator superfamily domain containing 2A (MFSD2A), transcript variant 2, mRNA [NM_032793] | 84879 |



|              |      |      |      |      |       |                                                                                          |       |
|--------------|------|------|------|------|-------|------------------------------------------------------------------------------------------|-------|
| A_23_P72157  | 1.0  | -1.0 | -1.6 | -2.2 | MFSD7 | Homo sapiens major facilitator superfamily domain containing 7 (MFSD7), mRNA [NM_032219] | 84179 |
| A_23_P154158 | -1.4 | -1.3 | -1.2 | -2.2 | MFSD9 | Homo sapiens major facilitator superfamily domain containing 9 (MFSD9), mRNA [NM_032718] | 84804 |
| A_23_P154155 | -2.0 | -1.0 | 1.3  | 1.4  | MFSD9 | Homo sapiens major facilitator superfamily domain containing 9 (MFSD9), mRNA [NM_032718] | 84804 |
| A_23_P37654  | -1.6 | -1.7 | -2.3 | -1.7 | MGA   | Homo sapiens MAX gene associated (MGA), transcript variant 1, mRNA [NM_001164273]        | 23269 |

|             |      |      |      |     |       |                                                                                                                                         |       |
|-------------|------|------|------|-----|-------|-----------------------------------------------------------------------------------------------------------------------------------------|-------|
| A_23_P49052 | -1.2 | 2.9  | 2.2  | 1.7 | MGA   | Homo sapiens MAX gene associated (MGA), transcript variant 1, mRNA [NM_001164273]                                                       | 23269 |
| A_23_P65558 | -4.4 | 1.6  | 1.6  | 1.0 | MGAT2 | Homo sapiens mannosyl (alpha-1,6-)-glycoprotein beta-1,2-N-acetylglucosaminyltransferase (MGAT2), mRNA [NM_002408]                      | 4247  |
| A_23_P91742 | 1.0  | -1.8 | -3.2 | 2.8 | MGAT3 | Homo sapiens mannosyl (beta-1,4-)-glycoprotein beta-1,4-N-acetylglucosaminyltransferase (MGAT3), transcript variant 1, mRNA [NM_002409] | 4248  |

|             |      |     |     |     |        |                                                                                                                                                         |       |
|-------------|------|-----|-----|-----|--------|---------------------------------------------------------------------------------------------------------------------------------------------------------|-------|
| A_23_P28507 | -7.9 | 4.0 | 1.3 | 1.7 | MGAT4A | Homo sapiens mannosyl (alpha-1,3-)-glycoprotein in beta-1,4-N-acetylglucosaminyltransferase, isozyme A (MGAT4A), transcript variant 1, mRNA [NM_012214] | 11320 |
| A_23_P10062 | -2.6 | 1.0 | 1.0 | 1.1 | MGAT4C | Homo sapiens mannosyl (alpha-1,3-)-glycoprotein in beta-1,4-N-acetylglucosaminyltransferase, isozyme C (putative) (MGAT4C), mRNA [NM_013244]            | 25834 |

|              |      |      |      |     |        |                                                                                                                                                      |        |
|--------------|------|------|------|-----|--------|------------------------------------------------------------------------------------------------------------------------------------------------------|--------|
| A_24_P219474 | -5.8 | -1.3 | -1.4 | 1.1 | MGAT5B | Homo sapiens mannosyl (alpha-1,6-)-glycoprotein beta-1,6-N-acetylglucosaminyltransferase, isozyme B (MGAT5B), transcript variant 1, mRNA [NM_144677] | 146664 |
| A_23_P202170 | -6.3 | 1.0  | -1.0 | 1.1 | MGEA5  | Homo sapiens meningioma expressed antigen 5 (hyaluronidase) (MGEA5), transcript variant 1, mRNA [NM_012215]                                          | 10724  |
| A_24_P226008 | 1.5  | 2.3  | 1.4  | 1.0 | MGLL   | Homo sapiens monoglyceride lipase (MGLL), transcript variant 1, mRNA [NM_007283]                                                                     | 11343  |

|              |      |     |      |     |       |                                                                                                     |       |
|--------------|------|-----|------|-----|-------|-----------------------------------------------------------------------------------------------------|-------|
| A_23_P104323 | 7.1  | 1.0 | -1.1 | 1.2 | MGMT  | Homo sapiens O-6-methylguanine-DNA methyltransferase (MGMT), mRNA [NM_002412]                       | 4255  |
| A_23_P355824 | -4.5 | 1.7 | 1.6  | 1.7 | MGRN1 | Homo sapiens mahogunin, ring finger 1 (MGRN1), transcript variant 1, mRNA [NM_015246]               | 23295 |
| A_23_P110167 | -1.5 | 2.4 | 1.1  | 1.6 | MGST2 | Homo sapiens microsomal glutathione S-transferase 2 (MGST2), transcript variant 1, mRNA [NM_002413] | 4258  |

|              |      |      |      |      |       |                                                                               |        |
|--------------|------|------|------|------|-------|-------------------------------------------------------------------------------|--------|
| A_23_P51548  | -1.0 | -1.0 | -3.0 | 1.1  | MGST3 | Homo sapiens microsomal glutathione S-transferase 3 (MGST3), mRNA [NM_004528] | 4259   |
| A_23_P205408 | -1.3 | 4.5  | 4.2  | 4.4  | MIA2  | Homo sapiens melanoma inhibitory activity 2 (MIA2), mRNA [NM_054024]          | 117153 |
| A_23_P117387 | -2.5 | -2.9 | 1.0  | -2.9 | MIA2  | Homo sapiens melanoma inhibitory activity 2 (MIA2), mRNA [NM_054024]          | 117153 |

|              |      |      |      |      |      |                                                                                                                                        |        |
|--------------|------|------|------|------|------|----------------------------------------------------------------------------------------------------------------------------------------|--------|
| A_24_P899928 | -2.3 | -1.1 | -1.1 | -1.1 | MIAT | Homo sapiens myocardial infarction associated transcript (non-protein coding) (MIAT), transcript variant 1, non-coding RNA [NR_003491] | 440823 |
| A_32_P25118  | -1.0 | -2.1 | -1.7 | -1.0 | MIB1 | Homo sapiens mRNA; cDNA DKFZp779F0655 (from clone DKFZp779F0655). [BX648566]                                                           | 57534  |
| A_24_P259328 | 2.7  | 3.0  | 3.0  | -1.0 | MIB2 | Homo sapiens mindbomb homolog 2 (Drosophila) (MIB2), transcript variant 1, mRNA [NM_080875]                                            | 142678 |

|              |      |      |      |     |        |                                                                                                                                         |           |
|--------------|------|------|------|-----|--------|-----------------------------------------------------------------------------------------------------------------------------------------|-----------|
| A_23_P257516 | -4.5 | -7.1 | 1.1  | 1.1 | MICA   | Homo sapiens MHC class I polypeptide-related sequence A (MICA), transcript variant 1 (allele MICA*001), mRNA [NM_000247]                | 100507436 |
| A_24_P283341 | 1.0  | -3.4 | -1.1 | 1.0 | MICAL1 | Homo sapiens microtubule associated monoxygenase, calponin and LIM domain containing 1 (MICAL1), transcript variant 1, mRNA [NM_022765] | 64780     |



|              |      |      |      |      |        |                                                                                                                                         |       |
|--------------|------|------|------|------|--------|-----------------------------------------------------------------------------------------------------------------------------------------|-------|
| A_24_P366082 | 1.0  | -5.5 | -1.1 | 1.1  | MICAL3 | Homo sapiens microtubule associated monoxygenase, calponin and LIM domain containing 3 (MICAL3), transcript variant 1, mRNA [NM_015241] | 57553 |
| A_23_P387471 | 36.6 | 36.2 | 34.6 | 33.7 | MICB   | Homo sapiens MHC class I polypeptide-related sequence B (MICB), mRNA [NM_005931]                                                        | 4277  |
| A_32_P74983  | 9.8  | 1.3  | 7.6  | 4.7  | MICB   | Homo sapiens MHC class I polypeptide-related sequence B (MICB), mRNA [NM_005931]                                                        | 4277  |

|              |      |     |      |      |       |                                                                                                                                          |       |
|--------------|------|-----|------|------|-------|------------------------------------------------------------------------------------------------------------------------------------------|-------|
| A_23_P46907  | 2.1  | 1.2 | -1.1 | -1.0 | MICU1 | Homo sapiens mitochondrial calcium uptake 1 (MICU1), nuclear gene encoding mitochondrial protein, transcript variant 1, mRNA [NM_006077] | 10367 |
| A_23_P170037 | 3.0  | 2.7 | 2.7  | 1.0  | MID1  | Homo sapiens midline 1 (Opitz/BBB syndrome) (MID1), transcript variant 3, mRNA [NM_033290]                                               | 4281  |
| A_32_P128656 | -1.1 | 1.0 | -3.9 | 1.0  | MID1  | Homo sapiens midline 1 (Opitz/BBB syndrome) (MID1), transcript variant 1, mRNA [NM_000381]                                               | 4281  |

|              |     |      |     |      |         |                                                                                                                                           |       |
|--------------|-----|------|-----|------|---------|-------------------------------------------------------------------------------------------------------------------------------------------|-------|
| A_23_P125579 | 3.0 | 3.2  | 3.2 | 2.5  | MID1IP1 | Homo sapiens MID1 interacting protein 1 (gastrulation specific G12 homolog (zebrafish)) (MID1IP1), transcript variant 1, mRNA [NM_021242] | 58526 |
| A_23_P159956 | 1.4 | -1.0 | 1.1 | -3.3 | MID2    | Homo sapiens midline 2 (MID2), transcript variant 1, mRNA [NM_012216]                                                                     | 11043 |
| A_23_P324461 | 1.3 | 2.1  | 1.6 | 1.7  | MIDN    | Homo sapiens midnolin (MIDN), mRNA [NM_177401]                                                                                            | 90007 |

|              |      |      |      |      |       |                                                                                                                              |       |
|--------------|------|------|------|------|-------|------------------------------------------------------------------------------------------------------------------------------|-------|
| A_24_P230916 | -2.4 | -1.1 | -3.5 | 1.7  | MIER1 | Homo sapiens mesoderm induction early response 1 homolog (Xenopus laevis) (MIER1), transcript variant 4, mRNA [NM_001077702] | 57708 |
| A_32_P128572 | 1.3  | -1.2 | -2.5 | -1.1 | MIER1 | Homo sapiens mesoderm induction early response 1 homolog (Xenopus laevis) (MIER1), transcript variant 4, mRNA [NM_001077702] | 57708 |
| A_23_P119683 | -1.5 | 1.5  | 2.1  | 1.0  | MIER2 | Homo sapiens mesoderm induction early response 1, family member 2 (MIER2), mRNA [NM_017550]                                  | 54531 |

|              |      |      |      |      |       |                                                                                                                          |       |
|--------------|------|------|------|------|-------|--------------------------------------------------------------------------------------------------------------------------|-------|
| A_24_P941131 | -2.7 | -1.0 | -1.0 | 1.0  | MIER2 | Homo sapiens mRNA for KIAA1193 protein, partial cds. [AB033019]                                                          | 54531 |
| A_23_P164313 | 2.4  | 2.2  | 2.9  | 2.6  | MINK1 | Homo sapiens misshapen-like kinase 1 (MINK1), transcript variant 3, mRNA [NM_153827]                                     | 50488 |
| A_23_P164307 | 4.0  | 2.8  | 7.8  | 1.7  | MINK1 | Homo sapiens misshapen-like kinase 1 (MINK1), transcript variant 3, mRNA [NM_153827]                                     | 50488 |
| A_23_P117274 | 1.1  | 4.4  | 2.3  | -6.6 | MIPEP | Homo sapiens mitochondrial intermediate peptidase (MIPEP), nuclear gene encoding mitochondrial protein, mRNA [NM_005932] | 4285  |

|              |     |      |      |      |          |                                                                                                               |           |
|--------------|-----|------|------|------|----------|---------------------------------------------------------------------------------------------------------------|-----------|
| A_24_P886966 | 2.8 | -9.7 | 2.7  | 2.5  | MIR210HG | Homo sapiens MIR210 host gene (non-protein coding) (MIR210HG), non-coding RNA [NR_038262]                     | 100506211 |
| A_24_P253723 | 2.4 | 2.3  | -1.3 | -1.5 | MIR22HG  | Homo sapiens MIR22 host gene (non-protein coding) (MIR22HG), transcript variant 1, non-coding RNA [NR_028502] | 84981     |
| A_32_P226907 | 1.5 | 3.5  | 1.2  | 1.6  | MIR497HG | Homo sapiens mir-497-195 cluster host gene (non-protein coding) (MIR497HG), non-coding RNA [NR_038310]        | 100506755 |

|              |      |      |      |      |            |                                                                                               |        |
|--------------|------|------|------|------|------------|-----------------------------------------------------------------------------------------------|--------|
| A_23_P216935 | -2.8 | 1.1  | 1.1  | -1.0 | MIR600HG   | Homo sapiens MIR600 host gene (non-protein coding) (MIR600HG), non-coding RNA [NR_026677]     | 81571  |
| A_23_P353667 | 1.0  | -2.5 | -1.1 | -1.1 | MIR7-3HG   | Homo sapiens MIR7-3 host gene (non-protein coding) (MIR7-3HG), non-coding RNA [NR_027148]     | 284424 |
| A_32_P330000 | 1.1  | -6.3 | -1.0 | -1.0 | MIRLET7BHG | Homo sapiens MIRLET7B host gene (non-protein coding) (MIRLET7BHG), non-coding RNA [NR_027033] | 400931 |
| A_23_P106162 | 2.2  | 4.0  | 3.8  | 3.9  | MIS18BP1   | Homo sapiens MIS18 binding protein 1 (MIS18BP1), mRNA [NM_018353]                             | 55320  |

|              |      |     |      |       |       |                                                                                                            |       |
|--------------|------|-----|------|-------|-------|------------------------------------------------------------------------------------------------------------|-------|
| A_24_P910310 | -4.0 | 1.0 | 1.0  | -1.7  | MITF  | Homo sapiens microphthalmia-associated transcription factor (MITF), transcript variant 2, mRNA [NM_198177] | 4286  |
| A_23_P73345  | 1.9  | 3.6 | 1.7  | -31.1 | MITF  | Homo sapiens microphthalmia-associated transcription factor (MITF), transcript variant 1, mRNA [NM_198159] | 4286  |
| A_23_P11739  | -3.5 | 1.1 | -1.6 | -1.2  | MIXL1 | Homo sapiens Mix paired-like homeobox (MIXL1), mRNA [NM_031944]                                            | 83881 |



|              |      |      |      |      |         |                                                                                                               |       |
|--------------|------|------|------|------|---------|---------------------------------------------------------------------------------------------------------------|-------|
| A_23_P50897  | 5.4  | 7.1  | 7.2  | 7.3  | MKI67IP | Homo sapiens MKI67 (FHA domain) interacting nucleolar phosphoprotein (MKI67IP), mRNA [NM_032390]              | 84365 |
| A_23_P79962  | -6.7 | -4.1 | -1.0 | -1.1 | MKKS    | Homo sapiens McKusick-Kaufman syndrome (MKKS), transcript variant 2, mRNA [NM_170784]                         | 8195  |
| A_23_P200126 | 1.8  | 4.0  | 1.7  | 1.8  | MKKN1   | Homo sapiens MAP kinase interacting serine/threonine kinase 1 (MKKN1), transcript variant 1, mRNA [NM_003684] | 8569  |

|              |      |      |      |      |       |                                                                                                               |       |
|--------------|------|------|------|------|-------|---------------------------------------------------------------------------------------------------------------|-------|
| A_23_P142304 | 1.6  | 1.6  | -3.9 | -1.2 | MKMK2 | Homo sapiens MAP kinase interacting serine/threonine kinase 2 (MKMK2), transcript variant 1, mRNA [NM_017572] | 2872  |
| A_24_P929754 | -1.5 | -2.4 | -1.0 | -2.1 | MKMK2 | Homo sapiens MAP kinase interacting serine/threonine kinase 2 (MKMK2), transcript variant 2, mRNA [NM_199054] | 2872  |
| A_24_P410627 | 1.1  | -1.1 | -2.7 | 1.6  | MKRN1 | Homo sapiens makorin ring finger protein 1 (MKRN1), transcript variant 2, mRNA [NM_001145125]                 | 23608 |

|              |      |      |      |      |        |                                                                                             |        |
|--------------|------|------|------|------|--------|---------------------------------------------------------------------------------------------|--------|
| A_23_P59798  | 1.7  | 3.0  | 1.8  | 1.0  | MKRN1  | Homo sapiens makorin ring finger protein 1 (MKRN1), transcript variant 1, mRNA [NM_013446]  | 23608  |
| A_32_P209624 | -1.0 | -2.3 | -1.1 | -2.7 | MKRN7P | Homo sapiens makorin ring finger protein 7, pseudogene (MKRN7P), non-coding RNA [NR_026640] | 7686   |
| A_23_P75002  | 3.2  | 4.4  | 1.6  | 1.3  | MKX    | Homo sapiens mohawk homeobox (MKX), transcript variant 1, mRNA [NM_173576]                  | 283078 |
| A_23_P43350  | 1.0  | -1.0 | 1.0  | 3.7  | MLANA  | Homo sapiens melan-A (MLANA), mRNA [NM_005511]                                              | 2315   |

|              |      |      |     |      |      |                                                                                                                          |       |
|--------------|------|------|-----|------|------|--------------------------------------------------------------------------------------------------------------------------|-------|
| A_23_P211680 | -1.0 | -1.0 | 2.8 | -4.8 | MLC1 | Homo sapiens megalencephalic leukoencephalopathy with subcortical cysts 1 (MLC1), transcript variant 1, mRNA [NM_015166] | 23209 |
| A_24_P304449 | 1.9  | 1.0  | 1.9 | -2.5 | MLEC | Homo sapiens malectin (MLEC), mRNA [NM_014730]                                                                           | 9761  |
| A_23_P13873  | 1.5  | 5.6  | 3.2 | 2.1  | MLF2 | Homo sapiens myeloid leukemia factor 2 (MLF2), transcript variant 1, mRNA [NM_005439]                                    | 8079  |

|              |      |      |      |      |      |                                                                                                                                       |       |
|--------------|------|------|------|------|------|---------------------------------------------------------------------------------------------------------------------------------------|-------|
| A_24_P196298 | -1.3 | -1.3 | 1.1  | -4.0 | MLL  | Homo sapiens myeloid/lymphoid or mixed-lineage leukemia (trithorax homolog, Drosophila) (MLL), transcript variant 2, mRNA [NM_005933] | 4297  |
| A_32_P209472 | 1.6  | -9.7 | 1.4  | 1.4  | MLL3 | Homo sapiens myeloid/lymphoid or mixed-lineage leukemia 3 (MLL3), mRNA [NM_170606]                                                    | 58508 |
| A_23_P142421 | 2.9  | 61.0 | 41.1 | 5.3  | MLL4 | Homo sapiens myeloid/lymphoid or mixed-lineage leukemia 4 (MLL4), mRNA [NM_014727]                                                    | 9757  |

|              |      |      |      |      |       |                                                                                                                                          |       |
|--------------|------|------|------|------|-------|------------------------------------------------------------------------------------------------------------------------------------------|-------|
| A_24_P196704 | 1.6  | -2.1 | -3.5 | -1.9 | MLL5  | Homo sapiens myeloid/lymphoid or mixed-lineage leukemia 5 (trithorax homolog, Drosophila) (MLL5), transcript variant 1, mRNA [NM_182931] | 55904 |
| A_24_P418126 | -1.4 | -4.0 | -3.5 | -2.2 | MLLT1 | Homo sapiens myeloid/lymphoid or mixed-lineage leukemia (trithorax homolog, Drosophila); translocated to, 1 (MLLT1), mRNA [NM_005934]    | 4298  |

|              |      |      |      |      |        |                                                                                                                                                               |      |
|--------------|------|------|------|------|--------|---------------------------------------------------------------------------------------------------------------------------------------------------------------|------|
| A_24_P151295 | -1.1 | -1.1 | -1.1 | -2.6 | MLLT1  | Homo sapiens myeloid/lymphoid or mixed-lineage leukemia (trithorax homolog, Drosophila); translocated to, 1 (MLLT1), mRNA [NM_005934]                         | 4298 |
| A_24_P406714 | -1.0 | -1.8 | 3.0  | 1.7  | MLLT10 | Homo sapiens myeloid/lymphoid or mixed-lineage leukemia (trithorax homolog, Drosophila); translocated to, 10 (MLLT10), transcript variant 1, mRNA [NM_004641] | 8028 |

|              |      |      |      |      |        |                                                                                                                                                               |      |
|--------------|------|------|------|------|--------|---------------------------------------------------------------------------------------------------------------------------------------------------------------|------|
| A_23_P311834 | -1.7 | -1.6 | -2.1 | -1.6 | MLLT10 | Homo sapiens myeloid/lymphoid or mixed-lineage leukemia (trithorax homolog, Drosophila); translocated to, 10 (MLLT10), transcript variant 1, mRNA [NM_004641] | 8028 |
| A_24_P84540  | -1.0 | -1.0 | -4.3 | 1.0  | MLLT10 | Homo sapiens myeloid/lymphoid or mixed-lineage leukemia (trithorax homolog, Drosophila); translocated to, 10 (MLLT10), transcript variant 1, mRNA [NM_004641] | 8028 |



|              |      |      |      |      |        |                                                                                                                                                               |      |
|--------------|------|------|------|------|--------|---------------------------------------------------------------------------------------------------------------------------------------------------------------|------|
| A_23_P149912 | -1.7 | -4.6 | -2.9 | -1.7 | MLLT10 | Homo sapiens myeloid/lymphoid or mixed-lineage leukemia (trithorax homolog, Drosophila); translocated to, 10 (MLLT10), transcript variant 1, mRNA [NM_004641] | 8028 |
| A_23_P216693 | 2.0  | 2.4  | 1.5  | 1.2  | MLLT3  | Homo sapiens myeloid/lymphoid or mixed-lineage leukemia (trithorax homolog, Drosophila); translocated to, 3 (MLLT3), mRNA [NM_004529]                         | 4300 |

|              |      |      |      |      |       |                                                                                                                                                                       |      |
|--------------|------|------|------|------|-------|-----------------------------------------------------------------------------------------------------------------------------------------------------------------------|------|
| A_23_P344694 | 1.1  | 1.0  | 1.0  | -3.3 | MLLT4 | Homo sapiens myeloid/lymphoid or mixed-lineage leukemia (trithorax homolog, Drosophila); translocated to, 4, mRNA (cDNA clone IMAGE:4861456), partial cds. [BC014505] | 4301 |
| A_23_P256603 | -1.6 | -1.0 | -2.1 | -1.1 | MLLT4 | Homo sapiens myeloid/lymphoid or mixed-lineage leukemia (trithorax homolog, Drosophila); translocated to, 4 (MLLT4), transcript variant 1, mRNA [NM_001207008]        | 4301 |

|              |      |     |      |      |       |                                                                                                                                       |      |
|--------------|------|-----|------|------|-------|---------------------------------------------------------------------------------------------------------------------------------------|------|
| A_32_P718498 | -2.1 | 3.7 | -1.1 | 3.9  | MLLT6 | Homo sapiens myeloid/lymphoid or mixed-lineage leukemia (trithorax homolog, Drosophila); translocated to, 6 (MLLT6), mRNA [NM_005937] | 4302 |
| A_32_P98683  | 2.5  | 3.0 | 2.8  | -1.0 | MLLT6 | Homo sapiens myeloid/lymphoid or mixed-lineage leukemia (trithorax homolog, Drosophila); translocated to, 6 (MLLT6), mRNA [NM_005937] | 4302 |
| A_23_P19523  | 7.0  | 2.8 | 14.6 | 2.1  | MLN   | Homo sapiens motilin (MLN), transcript variant 1, mRNA [NM_002418]                                                                    | 4295 |

|              |      |      |      |      |       |                                                                               |       |
|--------------|------|------|------|------|-------|-------------------------------------------------------------------------------|-------|
| A_23_P19529  | 2.4  | 3.8  | 2.3  | 2.4  | MLN   | Homo sapiens motilin (MLN), transcript variant 2, mRNA [NM_001040109]         | 4295  |
| A_23_P36905  | -1.0 | -2.3 | -1.2 | -1.5 | MLNR  | Homo sapiens motilin receptor (MLNR), mRNA [NM_001507]                        | 2862  |
| A_23_P165778 | 1.2  | -2.4 | 1.2  | -2.1 | MLPH  | Homo sapiens melanophilin (MLPH), transcript variant 1, mRNA [NM_024101]      | 79083 |
| A_23_P164148 | -1.3 | 1.2  | -5.3 | -6.8 | MLX   | Homo sapiens MAX-like protein X (MLX), transcript variant 3, mRNA [NM_170607] | 6945  |
| A_24_P415618 | -1.0 | -1.2 | 3.9  | 3.5  | MLXIP | Homo sapiens MLX interacting protein (MLXIP), mRNA [NM_014938]                | 22877 |

|              |     |     |     |      |        |                                                                                                                                                                  |        |
|--------------|-----|-----|-----|------|--------|------------------------------------------------------------------------------------------------------------------------------------------------------------------|--------|
| A_24_P415624 | 3.1 | 4.0 | 5.1 | 1.4  | MLXIP  | Homo sapiens MLX interacting protein (MLXIP), mRNA [NM_014938]                                                                                                   | 22877  |
| A_23_P2537   | 2.7 | 2.6 | 2.4 | -1.2 | MMAB   | Homo sapiens methylmalonic aciduria (cobalamin deficiency) cblB type (MMAB), nuclear gene encoding mitochondrial protein, transcript variant 1, mRNA [NM_052845] | 326625 |
| A_23_P418282 | 2.4 | 2.4 | 2.3 | 2.3  | MMACHC | Homo sapiens cDNA FLJ25671 fis, clone TST03755. [AK098537]                                                                                                       | 25974  |

|              |      |      |      |       |       |                                                                                                |       |
|--------------|------|------|------|-------|-------|------------------------------------------------------------------------------------------------|-------|
| A_23_P164047 | 1.6  | 1.1  | 2.3  | 1.6   | MMD   | Homo sapiens monocyte to macrophage differentiation-associated (MMD), mRNA [NM_012329]         | 23531 |
| A_23_P212061 | 1.0  | 1.0  | -1.0 | -18.2 | MME   | Homo sapiens membrane metallo-endopeptidase (MME), transcript variant 2b, mRNA [NM_007289]     | 4311  |
| A_23_P123448 | -3.1 | -3.1 | -3.1 | -3.0  | MMP16 | matrix metalloproteinase 16 (membrane-inserted) [Source:HGNC Symbol;Acc:7162] [ENST0000286614] | 4325  |

|              |      |      |      |      |       |                                                                                          |       |
|--------------|------|------|------|------|-------|------------------------------------------------------------------------------------------|-------|
| A_23_P136413 | -2.1 | 1.8  | -1.2 | 1.9  | MMP17 | Homo sapiens matrix metalloproteinase 17 (membrane-inserted) (MMP17), mRNA [NM_016155]   | 4326  |
| A_24_P184445 | 3.4  | 2.0  | 4.3  | 1.7  | MMP19 | Homo sapiens matrix metalloproteinase 19 (MMP19), transcript variant 1, mRNA [NM_002429] | 4327  |
| A_23_P203888 | -1.5 | -8.5 | -1.2 | 1.3  | MMP19 | Homo sapiens matrix metalloproteinase 19 (MMP19), transcript variant 1, mRNA [NM_002429] | 4327  |
| A_23_P376557 | 1.9  | 1.4  | 1.4  | -3.7 | MMP25 | Homo sapiens matrix metalloproteinase 25 (MMP25), mRNA [NM_022468]                       | 64386 |

|              |      |      |      |      |       |                                                                                                 |       |
|--------------|------|------|------|------|-------|-------------------------------------------------------------------------------------------------|-------|
| A_23_P2052   | 1.0  | -2.3 | -1.0 | -1.0 | MMP26 | Homo sapiens matrix metalloproteinase 26 (MMP26), mRNA [NM_021801]                              | 56547 |
| A_23_P26890  | -1.2 | -1.9 | 1.2  | -2.3 | MMP28 | Homo sapiens matrix metalloproteinase 28 (MMP28), transcript variant 1, mRNA [NM_024302]        | 79148 |
| A_23_P161698 | -4.6 | 1.0  | -1.0 | 1.1  | MMP3  | Homo sapiens matrix metalloproteinase 3 (stromelysin 1, progelatinase) (MMP3), mRNA [NM_002422] | 4314  |
| A_24_P369263 | -2.1 | -1.6 | -2.2 | -2.0 | MMS19 | Homo sapiens MMS19 nucleotide excision repair homolog (S. cerevisiae) (MMS19), mRNA [NM_022362] | 64210 |



|              |      |      |      |      |        |                                                                                                  |        |
|--------------|------|------|------|------|--------|--------------------------------------------------------------------------------------------------|--------|
| A_24_P83678  | 1.3  | 2.2  | 1.7  | -3.1 | MMS22L | Homo sapiens MMS22-like, DNA repair protein (MMS22L), mRNA [NM_198468]                           | 253714 |
| A_32_P137926 | -4.3 | 1.0  | 1.0  | 1.1  | MMS22L | Homo sapiens MMS22-like, DNA repair protein (MMS22L), mRNA [NM_198468]                           | 253714 |
| A_32_P95914  | -1.0 | -1.1 | -1.1 | -3.7 | MMS22L | Homo sapiens MMS22-like, DNA repair protein (MMS22L), mRNA [NM_198468]                           | 253714 |
| A_32_P6015   | -7.9 | 1.5  | -1.1 | -1.3 | MNX1   | Homo sapiens motor neuron and pancreas homeobox 1 (MNX1), transcript variant 1, mRNA [NM_005515] | 3110   |

|              |     |       |      |     |       |                                                                                                                                                |        |
|--------------|-----|-------|------|-----|-------|------------------------------------------------------------------------------------------------------------------------------------------------|--------|
| A_23_P108922 | 1.6 | 2.0   | 1.8  | 1.8 | MOB1A | MOB1,<br>Mps One<br>Binder<br>kinase<br>activator-<br>like 1B<br>(yeast)<br>[Source:H<br>GNC<br>Symbol;Ac<br>c:16015]<br>[ENST0000<br>0396049] | 55233  |
| A_23_P130919 | 1.1 | -12.5 | -1.9 | 1.8 | MOB3A | Homo<br>sapiens<br>MOB<br>kinase<br>activator<br>3A<br>(MOB3A),<br>mRNA<br>[NM_1308<br>07]                                                     | 126308 |
| A_24_P225339 | 3.8 | 3.9   | 4.4  | 3.6 | MOB3C | Homo<br>sapiens<br>MOB<br>kinase<br>activator<br>3C<br>(MOB3C),<br>transcript<br>variant 1,<br>mRNA<br>[NM_1452<br>79]                         | 148932 |
| A_23_P166    | 2.3 | 2.1   | 1.1  | 1.8 | MOB3C | Homo<br>sapiens<br>MOB<br>kinase<br>activator<br>3C<br>(MOB3C),<br>transcript<br>variant 1,<br>mRNA<br>[NM_1452<br>79]                         | 148932 |

|              |      |      |       |      |       |                                                                                              |       |
|--------------|------|------|-------|------|-------|----------------------------------------------------------------------------------------------|-------|
| A_23_P210274 | -1.4 | -2.5 | -3.4  | -1.6 | MOB4  | Homo sapiens MOB family member 4, phocein (MOB4), transcript variant 1, mRNA [NM_015387]     | 25843 |
| A_23_P67042  | 1.4  | 2.0  | 2.0   | 1.5  | MOCOS | Homo sapiens molybdenum cofactor sulfurase (MOCOS), mRNA [NM_017947]                         | 55034 |
| A_32_P521927 | 1.6  | 2.2  | 2.1   | -1.1 | MOCS1 | Homo sapiens molybdenum cofactor synthesis 1 (MOCS1), transcript variant 1, mRNA [NM_005943] | 4337  |
| A_23_P28811  | -1.4 | -1.7 | -22.7 | -1.8 | MOCS3 | Homo sapiens molybdenum cofactor synthesis 3 (MOCS3), mRNA [NM_014484]                       | 27304 |

|              |      |       |      |      |        |                                                                              |        |
|--------------|------|-------|------|------|--------|------------------------------------------------------------------------------|--------|
| A_23_P317796 | 1.7  | 1.8   | 2.0  | -4.7 | MOGAT3 | Homo sapiens monoacylglycerol O-acyltransferase 3 (MOGAT3), mRNA [NM_178176] | 346606 |
| A_24_P44596  | -4.3 | 2.7   | -1.2 | 1.7  | MON1B  | Homo sapiens MON1 homolog B (yeast) (MON1B), mRNA [NM_014940]                | 22879  |
| A_23_P304000 | -2.4 | 1.0   | -1.0 | 1.0  | MON2   | Homo sapiens MON2 homolog (S. cerevisiae) (MON2), mRNA [NM_015026]           | 23041  |
| A_24_P109244 | 1.0  | -26.3 | 1.0  | 1.0  | MON2   | Homo sapiens MON2 homolog (S. cerevisiae) (MON2), mRNA [NM_015026]           | 23041  |

|              |      |      |      |      |       |                                                                                                |       |
|--------------|------|------|------|------|-------|------------------------------------------------------------------------------------------------|-------|
| A_23_P83683  | -1.1 | 2.6  | -1.2 | -1.0 | MORC1 | Homo sapiens MORC family CW-type zinc finger 1 (MORC1), mRNA [NM_014429]                       | 27136 |
| A_23_P155027 | -2.7 | -3.4 | -1.1 | -1.0 | MORC2 | Homo sapiens MORC family CW-type zinc finger 2 (MORC2), mRNA [NM_014941]                       | 22880 |
| A_23_P325501 | 1.0  | -4.2 | -1.0 | 1.1  | MORC3 | Homo sapiens MORC family CW-type zinc finger 3 (MORC3), mRNA [NM_015358]                       | 23515 |
| A_23_P171117 | 2.4  | -2.0 | -3.7 | -1.1 | MORC4 | Homo sapiens MORC family CW-type zinc finger 4 (MORC4), transcript variant 1, mRNA [NM_024657] | 79710 |

|              |      |      |      |      |         |                                                                                          |        |
|--------------|------|------|------|------|---------|------------------------------------------------------------------------------------------|--------|
| A_23_P37579  | -2.4 | 1.1  | 1.0  | 1.0  | MORF4L1 | Homo sapiens mortality factor 4 like 1 (MORF4L1), transcript variant 2, mRNA [NM_206839] | 10933  |
| A_24_P333445 | 1.6  | 2.7  | 3.1  | 3.3  | MORF4L2 | Homo sapiens mortality factor 4 like 2 (MORF4L2), transcript variant 2, mRNA [NM_012286] | 9643   |
| A_32_P69465  | -2.8 | 1.2  | 1.1  | -1.6 | MORN2   | Homo sapiens MORN repeat containing 2 (MORN2), mRNA [NM_001145450]                       | 729967 |
| A_24_P401491 | -1.0 | -1.0 | -1.1 | -3.3 | MORN5   | Homo sapiens MORN repeat containing 5 (MORN5), mRNA [NM_198469]                          | 254956 |

|              |      |      |      |      |          |                                                                                                |        |
|--------------|------|------|------|------|----------|------------------------------------------------------------------------------------------------|--------|
| A_24_P126093 | -1.7 | -3.2 | -1.7 | -3.5 | MOSPD2   | Homo sapiens motile sperm domain containing 2 (MOSPD2), transcript variant 1, mRNA [NM_152581] | 158747 |
| A_23_P71598  | 1.0  | -1.9 | -3.2 | -1.0 | MPDZ     | Homo sapiens multiple PDZ domain protein (MPDZ), mRNA [NM_003829]                              | 8777   |
| A_23_P13657  | -1.3 | -1.5 | -2.4 | -1.1 | MPHOSPH9 | Homo sapiens M-phase phosphoprotein 9 (MPHOSPH9), mRNA [NM_022782]                             | 10198  |

|              |      |      |       |      |      |                                                                                                                              |       |
|--------------|------|------|-------|------|------|------------------------------------------------------------------------------------------------------------------------------|-------|
| A_23_P141346 | 1.0  | 1.0  | -13.5 | -1.0 | MPP3 | Homo sapiens membrane protein, palmitoylated 3 (MAGUK p55 subfamily member 3) (MPP3), transcript variant 1, mRNA [NM_001932] | 4356  |
| A_24_P347458 | 1.0  | -1.0 | -4.9  | -1.0 | MPP5 | Homo sapiens membrane protein, palmitoylated 5 (MAGUK p55 subfamily member 5) (MPP5), mRNA [NM_022474]                       | 64398 |
| A_23_P71053  | -1.2 | -1.5 | -2.1  | -1.7 | MPP6 | Homo sapiens membrane protein, palmitoylated 6 (MAGUK p55 subfamily member 6) (MPP6), mRNA [NM_016447]                       | 51678 |



|              |      |      |      |      |         |                                                                                                                                   |       |
|--------------|------|------|------|------|---------|-----------------------------------------------------------------------------------------------------------------------------------|-------|
| A_23_P27285  | -1.0 | -3.7 | -1.1 | -1.0 | MPPE1   | Homo sapiens metallophosphoesterase 1 (MPPE1), transcript variant 1, mRNA [NM_023075]                                             | 65258 |
| A_23_P165130 | 1.4  | 2.0  | 2.6  | 1.1  | MPV17L2 | Homo sapiens MPV17 mitochondrial membrane protein-like 2 (MPV17L2), nuclear gene encoding mitochondrial protein, mRNA [NM_032683] | 84769 |
| A_23_P138089 | -8.9 | -1.0 | -1.1 | -1.0 | MPZ     | Homo sapiens myelin protein zero (MPZ), mRNA [NM_000530]                                                                          | 4359  |

|              |      |      |      |      |       |                                                                                         |       |
|--------------|------|------|------|------|-------|-----------------------------------------------------------------------------------------|-------|
| A_23_P476    | -1.9 | -1.0 | -2.1 | -1.6 | MPZL1 | Homo sapiens myelin protein zero-like 1 (MPZL1), transcript variant 1, mRNA [NM_003953] | 9019  |
| A_24_P242391 | -1.1 | -3.2 | -2.1 | -1.9 | MPZL1 | Homo sapiens myelin protein zero-like 1 (MPZL1), transcript variant 1, mRNA [NM_003953] | 9019  |
| A_23_P11874  | -1.8 | 1.0  | -1.9 | -3.3 | MPZL1 | Homo sapiens myelin protein zero-like 1 (MPZL1), transcript variant 1, mRNA [NM_003953] | 9019  |
| A_23_P150379 | 1.2  | 1.7  | -2.2 | -1.0 | MPZL2 | Homo sapiens myelin protein zero-like 2 (MPZL2), transcript variant 2, mRNA [NM_144765] | 10205 |

|              |      |      |      |      |        |                                                                                                                        |       |
|--------------|------|------|------|------|--------|------------------------------------------------------------------------------------------------------------------------|-------|
| A_23_P381172 | -1.0 | -3.2 | -1.0 | -1.1 | MRAP   | Homo sapiens melanocortin 2 receptor accessory protein (MRAP), transcript variant 2, mRNA [NM_206898]                  | 56246 |
| A_23_P49627  | -2.9 | -1.1 | -1.2 | -1.1 | MRC2   | Homo sapiens mannose receptor, C type 2 (MRC2), mRNA [NM_006039]                                                       | 9902  |
| A_24_P312671 | 2.1  | 2.0  | 1.8  | 1.3  | MRE11A | Homo sapiens MRE11 meiotic recombination 11 homolog A (S. cerevisiae) (MRE11A), transcript variant 2, mRNA [NM_005590] | 4361  |

|              |      |      |      |      |          |                                                                                                                        |        |
|--------------|------|------|------|------|----------|------------------------------------------------------------------------------------------------------------------------|--------|
| A_23_P150189 | -1.0 | -5.5 | -1.0 | -1.0 | MRE11A   | Homo sapiens MRE11 meiotic recombination 11 homolog A (S. cerevisiae) (MRE11A), transcript variant 2, mRNA [NM_005590] | 4361   |
| A_23_P108948 | -1.0 | -3.7 | -1.0 | -1.0 | MREG     | Homo sapiens melanoregulin (MREG), mRNA [NM_018000]                                                                    | 55686  |
| A_24_P11965  | -2.9 | 1.7  | -2.2 | -1.3 | MRFAP1   | Homo sapiens Morf4 family associated protein 1 (MRFAP1), mRNA [NM_033296]                                              | 93621  |
| A_23_P133058 | 1.1  | 1.0  | -1.0 | -4.4 | MRFAP1L1 | Homo sapiens Morf4 family associated protein 1-like 1 (MRFAP1L1), mRNA [NM_203462]                                     | 114932 |

|              |      |     |      |      |          |                                                                                                                               |        |
|--------------|------|-----|------|------|----------|-------------------------------------------------------------------------------------------------------------------------------|--------|
| A_23_P425826 | -4.8 | 1.6 | 1.1  | -2.9 | MRFAP1L1 | Homo sapiens Morf4 family associated protein 1-like 1 (MRFAP1L1), mRNA [NM_203462]                                            | 114932 |
| A_23_P161983 | 1.5  | 2.3 | -1.9 | 1.0  | MRGPRX4  | Homo sapiens MAS-related GPR, member X4 (MRGPRX4), mRNA [NM_054032]                                                           | 117196 |
| A_24_P279797 | -3.6 | 1.1 | 1.0  | 1.1  | MRI1     | Homo sapiens methylthioribose-1-phosphate isomerase homolog (S. cerevisiae) (MRI1), transcript variant 1, mRNA [NM_001031727] | 84245  |

|             |      |      |      |      |      |                                                                                                                                                   |       |
|-------------|------|------|------|------|------|---------------------------------------------------------------------------------------------------------------------------------------------------|-------|
| A_23_P15603 | -2.8 | 1.6  | 1.0  | -1.0 | MRM1 | Homo sapiens mitochondrial rRNA methyltransferase 1 homolog (S. cerevisiae) (MRM1), nuclear gene encoding mitochondrial protein, mRNA [NM_024864] | 79922 |
| A_23_P4545  | -1.4 | 2.4  | 1.3  | -2.1 | MRO  | Homo sapiens maestro (MRO), transcript variant 1, mRNA [NM_031939]                                                                                | 83876 |
| A_32_P49309 | 1.0  | -1.3 | -2.3 | 1.0  | MRO  | Homo sapiens maestro (MRO), transcript variant 1, mRNA [NM_031939]                                                                                | 83876 |

|              |      |      |      |      |        |                                                                                                                                                |       |
|--------------|------|------|------|------|--------|------------------------------------------------------------------------------------------------------------------------------------------------|-------|
| A_24_P32672  | -1.9 | -3.1 | -1.4 | -3.8 | MRPL11 | Homo sapiens mitochondrial ribosomal protein L11 (MRPL11), nuclear gene encoding mitochondrial protein, transcript variant 1, mRNA [NM_016050] | 65003 |
| A_23_P170352 | 2.6  | 2.9  | 1.7  | -1.0 | MRPL12 | Homo sapiens mitochondrial ribosomal protein L12 (MRPL12), nuclear gene encoding mitochondrial protein, mRNA [NM_002949]                       | 6182  |

|              |       |     |     |     |        |                                                                                                                          |       |
|--------------|-------|-----|-----|-----|--------|--------------------------------------------------------------------------------------------------------------------------|-------|
| A_23_P47497  | 4.3   | 3.4 | 2.9 | 3.9 | MRPL16 | Homo sapiens mitochondrial ribosomal protein L16 (MRPL16), nuclear gene encoding mitochondrial protein, mRNA [NM_017840] | 54948 |
| A_23_P102262 | -48.0 | 1.1 | 1.2 | 1.1 | MRPL19 | Homo sapiens mitochondrial ribosomal protein L19 (MRPL19), nuclear gene encoding mitochondrial protein, mRNA [NM_014763] | 9801  |



|              |      |      |      |     |        |                                                                                                                                                |        |
|--------------|------|------|------|-----|--------|------------------------------------------------------------------------------------------------------------------------------------------------|--------|
| A_24_P17909  | 1.8  | 1.8  | 2.3  | 1.0 | MRPL2  | Homo sapiens mitochondrial ribosomal protein L2 (MRPL2), nuclear gene encoding mitochondrial protein, mRNA [NM_015950]                         | 51069  |
| A_23_P115955 | -1.4 | -4.3 | -4.0 | 1.4 | MRPL21 | Homo sapiens mitochondrial ribosomal protein L21 (MRPL21), nuclear gene encoding mitochondrial protein, transcript variant 1, mRNA [NM_181515] | 219927 |

|              |     |      |     |     |        |                                                                                                                                                |       |
|--------------|-----|------|-----|-----|--------|------------------------------------------------------------------------------------------------------------------------------------------------|-------|
| A_23_P137848 | 1.4 | -2.3 | 2.0 | 2.1 | MRPL24 | Homo sapiens mitochondrial ribosomal protein L24 (MRPL24), nuclear gene encoding mitochondrial protein, transcript variant 1, mRNA [NM_145729] | 79590 |
| A_23_P218619 | 3.1 | 3.1  | 2.0 | 1.4 | MRPL30 | Homo sapiens mitochondrial ribosomal protein L30 (MRPL30), nuclear gene encoding mitochondrial protein, transcript variant 1, mRNA [NM_145212] | 51263 |

|              |      |     |     |      |        |                                                                                                                                                |       |
|--------------|------|-----|-----|------|--------|------------------------------------------------------------------------------------------------------------------------------------------------|-------|
| A_23_P111753 | -3.9 | 1.0 | 1.1 | 1.0  | MRPL32 | Homo sapiens mitochondrial ribosomal protein L32 (MRPL32), nuclear gene encoding mitochondrial protein, mRNA [NM_031903]                       | 64983 |
| A_23_P165651 | 1.1  | 1.0 | 1.0 | -2.3 | MRPL35 | Homo sapiens mitochondrial ribosomal protein L35 (MRPL35), nuclear gene encoding mitochondrial protein, transcript variant 2, mRNA [NM_145644] | 51318 |

|             |      |       |      |     |        |                                                                                                                                                |       |
|-------------|------|-------|------|-----|--------|------------------------------------------------------------------------------------------------------------------------------------------------|-------|
| A_24_P97221 | -1.9 | -16.0 | -1.0 | 1.1 | MRPL35 | Homo sapiens mitochondrial ribosomal protein L35 (MRPL35), nuclear gene encoding mitochondrial protein, transcript variant 1, mRNA [NM_016622] | 51318 |
| A_32_P16489 | 1.9  | 2.0   | -3.2 | 1.0 | MRPL35 | Homo sapiens mitochondrial ribosomal protein L35 (MRPL35), nuclear gene encoding mitochondrial protein, transcript variant 2, mRNA [NM_145644] | 51318 |

|              |     |      |      |      |        |                                                                                                                                              |       |
|--------------|-----|------|------|------|--------|----------------------------------------------------------------------------------------------------------------------------------------------|-------|
| A_24_P371758 | 1.0 | -7.9 | -1.0 | -1.0 | MRPL36 | Homo sapiens mitochondrial ribosomal protein L36 (MRPL36), nuclear gene encoding mitochondrial protein, mRNA [NM_032479]                     | 64979 |
| A_23_P164702 | 1.3 | 1.3  | 1.1  | 2.5  | MRPL4  | Homo sapiens mitochondrial ribosomal protein L4 (MRPL4), nuclear gene encoding mitochondrial protein, transcript variant 1, mRNA [NM_015956] | 51073 |

|              |      |      |      |      |        |                                                                                                                          |       |
|--------------|------|------|------|------|--------|--------------------------------------------------------------------------------------------------------------------------|-------|
| A_24_P228667 | 3.5  | 3.3  | 3.1  | 3.3  | MRPL40 | Homo sapiens mitochondrial ribosomal protein L40 (MRPL40), nuclear gene encoding mitochondrial protein, mRNA [NM_003776] | 64976 |
| A_32_P115130 | -2.1 | -2.1 | -2.3 | -2.2 | MRPL41 | Homo sapiens mitochondrial ribosomal protein L41 (MRPL41), nuclear gene encoding mitochondrial protein, mRNA [NM_032477] | 64975 |

|              |      |      |      |      |          |                                                                                                                                                |        |
|--------------|------|------|------|------|----------|------------------------------------------------------------------------------------------------------------------------------------------------|--------|
| A_24_P352445 | -1.5 | -1.5 | -2.5 | -1.7 | MRPL42   | Homo sapiens mitochondrial ribosomal protein L42 (MRPL42), nuclear gene encoding mitochondrial protein, transcript variant 2, mRNA [NM_172177] | 28977  |
| A_23_P398491 | 3.4  | 3.4  | 1.7  | 3.0  | MRPL42P5 | Homo sapiens mitochondrial ribosomal protein L42 pseudogene 5 (MRPL42P5), non-coding RNA [NR_002208]                                           | 359821 |

|              |      |     |       |      |        |                                                                                                                                                |       |
|--------------|------|-----|-------|------|--------|------------------------------------------------------------------------------------------------------------------------------------------------|-------|
| A_23_P346384 | -2.5 | 1.1 | 1.2   | 1.0  | MRPL43 | Homo sapiens mitochondrial ribosomal protein L43 (MRPL43), nuclear gene encoding mitochondrial protein, transcript variant 2, mRNA [NM_176792] | 84545 |
| A_23_P90589  | 1.1  | 1.0 | -11.4 | -1.0 | MRPL44 | Homo sapiens mitochondrial ribosomal protein L44 (MRPL44), nuclear gene encoding mitochondrial protein, mRNA [NM_022915]                       | 65080 |



|              |      |      |      |      |        |                                                                                                                          |       |
|--------------|------|------|------|------|--------|--------------------------------------------------------------------------------------------------------------------------|-------|
| A_32_P9575   | -1.0 | -1.7 | -3.1 | 1.0  | MRPL45 | Homo sapiens mitochondrial ribosomal protein L45 (MRPL45), nuclear gene encoding mitochondrial protein, mRNA [NM_032351] | 84311 |
| A_32_P209989 | -4.6 | -1.1 | -1.1 | -1.1 | MRPL46 | Homo sapiens mitochondrial ribosomal protein L46 (MRPL46), nuclear gene encoding mitochondrial protein, mRNA [NM_022163] | 26589 |

|              |     |     |      |      |        |                                                                                                                                                |        |
|--------------|-----|-----|------|------|--------|------------------------------------------------------------------------------------------------------------------------------------------------|--------|
| A_24_P409330 | 1.1 | 1.9 | -1.1 | -3.1 | MRPL52 | Homo sapiens mitochondrial ribosomal protein L52 (MRPL52), nuclear gene encoding mitochondrial protein, transcript variant 4, mRNA [NM_181304] | 122704 |
| A_24_P371194 | 1.9 | 2.3 | 1.6  | 1.5  | MRPL53 | Homo sapiens mitochondrial ribosomal protein L53 (MRPL53), nuclear gene encoding mitochondrial protein, mRNA [NM_053050]                       | 116540 |

|              |      |      |      |      |        |                                                                                                                                                |        |
|--------------|------|------|------|------|--------|------------------------------------------------------------------------------------------------------------------------------------------------|--------|
| A_23_P101742 | 1.1  | -3.0 | -3.4 | -1.0 | MRPL54 | Homo sapiens mitochondrial ribosomal protein L54 (MRPL54), nuclear gene encoding mitochondrial protein, mRNA [NM_172251]                       | 116541 |
| A_24_P49539  | -1.2 | -2.4 | -1.2 | -3.2 | MRPL55 | Homo sapiens mitochondrial ribosomal protein L55 (MRPL55), nuclear gene encoding mitochondrial protein, transcript variant 4, mRNA [NM_181462] | 128308 |

|              |     |      |      |      |        |                                                                                                                              |       |
|--------------|-----|------|------|------|--------|------------------------------------------------------------------------------------------------------------------------------|-------|
| A_24_P283294 | 7.5 | 5.1  | 11.1 | 10.0 | MRPS10 | Homo sapiens mitochondrial ribosomal protein S10 (MRPS10), nuclear gene encoding mitochondrial protein, mRNA [NM_018141]     | 55173 |
| A_24_P913666 | 1.1 | -4.1 | 1.1  | 1.1  | MRPS11 | Homo sapiens mitochondrial ribosomal protein S11, mRNA (cDNA clone IMAGE:3352526), with apparent retained intron. [BC000200] | 64963 |

|              |     |     |      |      |        |                                                                                                                                                |       |
|--------------|-----|-----|------|------|--------|------------------------------------------------------------------------------------------------------------------------------------------------|-------|
| A_23_P48977  | 3.6 | 2.3 | 4.9  | -1.2 | MRPS11 | Homo sapiens mitochondrial ribosomal protein S11 (MRPS11), nuclear gene encoding mitochondrial protein, transcript variant 1, mRNA [NM_022839] | 64963 |
| A_24_P935318 | 1.7 | 1.5 | -2.0 | -2.2 | MRPS11 | Homo sapiens mitochondrial ribosomal protein S11 (MRPS11), nuclear gene encoding mitochondrial protein, transcript variant 1, mRNA [NM_022839] | 64963 |

|             |      |      |      |      |        |                                                                                                                                                |       |
|-------------|------|------|------|------|--------|------------------------------------------------------------------------------------------------------------------------------------------------|-------|
| A_23_P50807 | -1.6 | -2.1 | -3.2 | -3.6 | MRPS12 | Homo sapiens mitochondrial ribosomal protein S12 (MRPS12), nuclear gene encoding mitochondrial protein, transcript variant 1, mRNA [NM_021107] | 6183  |
| A_23_P62731 | -1.7 | -1.8 | -2.0 | -2.8 | MRPS14 | Homo sapiens mitochondrial ribosomal protein S14 (MRPS14), nuclear gene encoding mitochondrial protein, transcript variant 1, mRNA [NM_022100] | 63931 |

|              |       |     |      |      |         |                                                                                                                                                  |       |
|--------------|-------|-----|------|------|---------|--------------------------------------------------------------------------------------------------------------------------------------------------|-------|
| A_23_P114826 | 3.8   | 1.2 | -1.7 | -1.1 | MRPS15  | Homo sapiens mitochondrial ribosomal protein S15 (MRPS15), nuclear gene encoding mitochondrial protein, mRNA [NM_031280]                         | 64960 |
| A_23_P122387 | -16.8 | 1.0 | -7.2 | 1.0  | MRPS18A | Homo sapiens mitochondrial ribosomal protein S18A (MRPS18A), nuclear gene encoding mitochondrial protein, transcript variant 1, mRNA [NM_018135] | 55168 |

|              |      |     |     |     |        |                                                                                                                                                |       |
|--------------|------|-----|-----|-----|--------|------------------------------------------------------------------------------------------------------------------------------------------------|-------|
| A_23_P135104 | 1.7  | 1.7 | 2.4 | 1.0 | MRPS2  | Homo sapiens mitochondrial ribosomal protein S2 (MRPS2), nuclear gene encoding mitochondrial protein, mRNA [NM_016034]                         | 51116 |
| A_23_P86182  | -2.3 | 1.3 | 1.1 | 1.1 | MRPS21 | Homo sapiens mitochondrial ribosomal protein S21 (MRPS21), nuclear gene encoding mitochondrial protein, transcript variant 1, mRNA [NM_031901] | 54460 |



|              |      |      |      |      |        |                                                                                                                                                |       |
|--------------|------|------|------|------|--------|------------------------------------------------------------------------------------------------------------------------------------------------|-------|
| A_24_P139816 | -3.0 | -2.0 | -3.3 | 1.0  | MRPS21 | Homo sapiens mitochondrial ribosomal protein S21 (MRPS21), nuclear gene encoding mitochondrial protein, transcript variant 1, mRNA [NM_031901] | 54460 |
| A_23_P72138  | 2.4  | -1.0 | 1.6  | -2.9 | MRPS22 | Homo sapiens mitochondrial ribosomal protein S22 (MRPS22), nuclear gene encoding mitochondrial protein, mRNA [NM_020191]                       | 56945 |

|              |     |      |      |      |        |                                                                                                                          |       |
|--------------|-----|------|------|------|--------|--------------------------------------------------------------------------------------------------------------------------|-------|
| A_23_P252536 | 1.4 | 1.3  | 3.0  | 1.7  | MRPS26 | Homo sapiens mitochondrial ribosomal protein S26 (MRPS26), nuclear gene encoding mitochondrial protein, mRNA [NM_030811] | 64949 |
| A_24_P187859 | 1.1 | 1.1  | 2.1  | 1.1  | MRPS27 | Homo sapiens cDNA FLJ38645 fis, clone HHDPC2005794. [AK095964]                                                           | 23107 |
| A_23_P252362 | 1.0 | -3.9 | -1.0 | -1.0 | MRPS30 | Homo sapiens mitochondrial ribosomal protein S30 (MRPS30), nuclear gene encoding mitochondrial protein, mRNA [NM_016640] | 10884 |

|              |      |     |     |       |        |                                                                                                                          |       |
|--------------|------|-----|-----|-------|--------|--------------------------------------------------------------------------------------------------------------------------|-------|
| A_23_P29575  | 1.0  | 1.0 | 3.0 | -1.0  | MRPS36 | Homo sapiens mitochondrial ribosomal protein S36 (MRPS36), nuclear gene encoding mitochondrial protein, mRNA [NM_033281] | 92259 |
| A_24_P365571 | -1.1 | 1.5 | 1.3 | -32.5 | MRPS6  | Homo sapiens mitochondrial ribosomal protein S6 (MRPS6), nuclear gene encoding mitochondrial protein, mRNA [NM_032476]   | 64968 |

|              |      |      |      |      |       |                                                                                                                                                  |       |
|--------------|------|------|------|------|-------|--------------------------------------------------------------------------------------------------------------------------------------------------|-------|
| A_24_P175427 | -1.1 | 1.1  | -4.0 | 1.1  | MRRF  | Homo sapiens mitochondrial ribosome recycling factor (MRRF), nuclear gene encoding mitochondrial protein, transcript variant 2, mRNA [NM_199177] | 92399 |
| A_23_P111373 | -1.0 | -3.3 | 1.0  | -1.0 | MRS2  | Homo sapiens MRS2 magnesium homeostasis factor homolog (S. cerevisiae) (MRS2), mRNA [NM_020662]                                                  | 57380 |
| A_23_P35099  | 3.2  | -1.0 | 1.1  | 1.4  | MRTO4 | Homo sapiens mRNA turnover 4 homolog (S. cerevisiae) (MRTO4), mRNA [NM_016183]                                                                   | 51154 |

|              |      |      |      |      |           |                                                                                                                   |           |
|--------------|------|------|------|------|-----------|-------------------------------------------------------------------------------------------------------------------|-----------|
| A_23_P396299 | -1.6 | -2.4 | -1.9 | -1.8 | MRVI1-AS1 | Homo sapiens uncharacterized LOC100129827 (LOC100129827), non-coding RNA [NR_034094]                              | 100129827 |
| A_23_P98565  | -1.3 | -1.2 | -2.0 | -2.1 | MS4A14    | Homo sapiens membrane-spanning 4-domains, subfamily A, member 14 (MS4A14), transcript variant 1, mRNA [NM_032597] | 84689     |
| A_24_P30389  | -2.3 | -8.1 | -1.2 | -1.2 | MS4A15    | Homo sapiens membrane-spanning 4-domains, subfamily A, member 15 (MS4A15), transcript variant 2, mRNA [NM_152717] | 219995    |

|             |      |      |      |      |        |                                                                                                                                                                 |       |
|-------------|------|------|------|------|--------|-----------------------------------------------------------------------------------------------------------------------------------------------------------------|-------|
| A_23_P1904  | -3.1 | -1.0 | -5.1 | 1.8  | MS4A2  | Homo sapiens membrane-spanning 4-domains, subfamily A, member 2 (Fc fragment of IgE, high affinity I, receptor for; beta polypeptide) (MS4A2), mRNA [NM_000139] | 2206  |
| A_23_P75769 | 1.0  | -2.6 | -1.0 | -3.6 | MS4A4A | Homo sapiens membrane-spanning 4-domains, subfamily A, member 4 (MS4A4A), transcript variant 2, mRNA [NM_024021]                                                | 51338 |

|              |      |       |      |      |        |                                                                                             |        |
|--------------|------|-------|------|------|--------|---------------------------------------------------------------------------------------------|--------|
| A_23_P416238 | -2.6 | -1.2  | -2.1 | -3.1 | MS4A6E | Homo sapiens membrane-spanning 4-domains, subfamily A, member 6E (MS4A6E), mRNA [NM_139249] | 245802 |
| A_23_P139146 | 1.0  | -24.8 | 1.0  | -1.0 | MS4A8B | Homo sapiens membrane-spanning 4-domains, subfamily A, member 8B (MS4A8B), mRNA [NM_031457] | 83661  |
| A_23_P122001 | 2.1  | -1.1  | -1.3 | -1.3 | MSH3   | Homo sapiens mutS homolog 3 (E. coli) (MSH3), mRNA [NM_002439]                              | 4437   |
| A_23_P102202 | 1.3  | -6.2  | -1.0 | 1.1  | MSH6   | Homo sapiens mutS homolog 6 (E. coli) (MSH6), mRNA [NM_000179]                              | 2956   |

|              |      |       |      |      |      |                                                                                                         |        |
|--------------|------|-------|------|------|------|---------------------------------------------------------------------------------------------------------|--------|
| A_23_P139795 | -1.5 | 1.5   | 4.0  | -1.0 | MSI1 | Homo sapiens musashi homolog 1 (Drosophila) (MSI1), mRNA [NM_002442]                                    | 4440   |
| A_23_P369479 | 1.1  | -14.8 | 1.2  | 1.1  | MSI2 | Homo sapiens musashi homolog 2 (Drosophila) (MSI2), transcript variant 2, mRNA [NM_170721]              | 124540 |
| A_23_P44195  | -1.0 | -3.7  | -1.0 | -1.0 | MSI2 | Homo sapiens musashi homolog 2 (Drosophila) (MSI2), transcript variant 1, mRNA [NM_138962]              | 124540 |
| A_23_P132438 | -1.0 | -1.8  | -2.8 | -1.0 | MSL2 | Homo sapiens male-specific lethal 2 homolog (Drosophila) (MSL2), transcript variant 1, mRNA [NM_018133] | 55167  |



|              |      |      |      |      |        |                                                                                                            |        |
|--------------|------|------|------|------|--------|------------------------------------------------------------------------------------------------------------|--------|
| A_23_P353514 | -3.9 | -1.0 | -1.1 | -1.1 | MSL3   | Homo sapiens male-specific lethal 3 homolog (Drosophila) (MSL3), transcript variant 4, mRNA [NM_078628]    | 10943  |
| A_32_P235159 | 7.3  | 4.6  | 6.5  | 6.5  | MSL3P1 | Homo sapiens male-specific lethal 3 homolog (Drosophila) pseudogene 1 (MSL3P1), non-coding RNA [NR_024322] | 151507 |
| A_23_P333934 | -2.5 | -1.1 | -1.1 | 1.2  | MSLNL  | Homo sapiens mesothelin-like (MSLNL), mRNA [NM_001025190]                                                  | 401827 |
| A_23_P73593  | -2.5 | 1.0  | 1.0  | 1.0  | MSN    | Homo sapiens moesin (MSN), mRNA [NM_002444]                                                                | 4478   |

|              |      |      |      |      |      |                                                                                                  |      |
|--------------|------|------|------|------|------|--------------------------------------------------------------------------------------------------|------|
| A_23_P73589  | -1.2 | -1.2 | -2.9 | -1.2 | MSN  | Homo sapiens moesin (MSN), mRNA [NM_002444]                                                      | 4478 |
| A_23_P392942 | 2.2  | 1.8  | 1.1  | 4.0  | MSR1 | Homo sapiens macrophage scavenger receptor 1 (MSR1), transcript variant SR-A11, mRNA [NM_002445] | 4481 |
| A_32_P138359 | 9.8  | 3.8  | 3.6  | 2.1  | MSRA | Homo sapiens methionine sulfoxide reductase A (MSRA), transcript variant 1, mRNA [NM_012331]     | 4482 |

|              |      |      |      |      |        |                                                                                                                         |       |
|--------------|------|------|------|------|--------|-------------------------------------------------------------------------------------------------------------------------|-------|
| A_32_P122373 | 1.1  | 1.1  | 1.0  | -4.0 | MST1P2 | Homo sapiens macrophage stimulating 1 (hepatocyte growth factor-like) pseudogene 2 (MST1P2), non-coding RNA [NR_027504] | 11209 |
| A_23_P340376 | -7.1 | 1.2  | 1.2  | 1.2  | MST1P9 | Homo sapiens macrophage stimulating 1 (hepatocyte growth factor-like) pseudogene 9 (MST1P9), non-coding RNA [NR_002729] | 11223 |
| A_23_P110430 | -1.0 | -1.0 | -1.0 | -5.2 | MSX1   | Homo sapiens msh homeobox 1 (MSX1), mRNA [NM_002448]                                                                    | 4487  |

|              |      |      |      |      |       |                                                                                 |      |
|--------------|------|------|------|------|-------|---------------------------------------------------------------------------------|------|
| A_23_P37983  | 4.1  | 1.3  | 3.0  | 1.5  | MT1B  | Homo sapiens metallothionein 1B (MT1B), mRNA [NM_005947]                        | 4490 |
| A_23_P206724 | 1.9  | -2.7 | -1.2 | 1.5  | MT1E  | Homo sapiens metallothionein 1E (MT1E), mRNA [NM_175617]                        | 4493 |
| A_23_P60933  | -2.9 | -1.0 | -1.3 | -1.2 | MT1G  | Homo sapiens metallothionein 1G (MT1G), mRNA [NM_005950]                        | 4495 |
| A_23_P414343 | -2.8 | -2.8 | -2.1 | -1.1 | MT1H  | Homo sapiens metallothionein 1H (MT1H), mRNA [NM_005951]                        | 4496 |
| A_24_P74828  | 5.0  | 4.7  | 4.4  | 4.7  | MT1JP | Homo sapiens metallothionein 1J, pseudogene (MT1JP), non-coding RNA [NR_036677] | 4498 |

|              |      |      |      |      |      |                                                                                      |      |
|--------------|------|------|------|------|------|--------------------------------------------------------------------------------------|------|
| A_23_P427703 | -1.1 | -1.0 | -4.1 | -1.8 | MT1L | Homo sapiens metallothionein 1L (gene/pseudogene) (MT1L), non-coding RNA [NR_001447] | 4500 |
| A_23_P206718 | -1.5 | -1.0 | -1.5 | -2.7 | MT1X | metallothionein 1X [Source:HGNC Symbol;Acc:7405] [ENST00000394485]                   | 4501 |
| A_23_P303242 | -1.8 | -1.4 | -2.1 | 1.4  | MT1X | Homo sapiens metallothionein 1X (MT1X), mRNA [NM_005952]                             | 4501 |
| A_24_P125096 | 1.1  | 1.4  | 1.1  | 2.2  | MT1X | Homo sapiens metallothionein 1X (MT1X), mRNA [NM_005952]                             | 4501 |
| A_23_P252413 | 2.2  | 2.1  | 2.0  | 2.0  | MT2A | Homo sapiens metallothionein 2A (MT2A), mRNA [NM_005953]                             | 4502 |

|              |      |       |      |      |      |                                                                                     |       |
|--------------|------|-------|------|------|------|-------------------------------------------------------------------------------------|-------|
| A_23_P152398 | -1.1 | -10.5 | -1.2 | -1.2 | MT4  | Homo sapiens metallothionein 4 (MT4), mRNA [NM_032935]                              | 84560 |
| A_23_P9513   | -1.8 | -1.8  | -7.0 | -2.0 | MTA1 | Homo sapiens metastasis associated 1 (MTA1), transcript variant 1, mRNA [NM_004689] | 9112  |
| A_24_P241373 | 1.6  | 3.0   | -1.3 | -1.0 | MTA1 | Homo sapiens metastasis associated 1 (MTA1), transcript variant 1, mRNA [NM_004689] | 9112  |
| A_23_P203420 | -4.5 | -2.7  | -1.2 | -6.0 | MTA2 | Homo sapiens metastasis associated 1 family, member 2 (MTA2), mRNA [NM_004739]      | 9219  |

|              |      |       |      |      |      |                                                                                                                                                 |       |
|--------------|------|-------|------|------|------|-------------------------------------------------------------------------------------------------------------------------------------------------|-------|
| A_23_P411431 | 2.0  | 1.1   | 1.9  | 2.1  | MTA3 | Homo sapiens cDNA FLJ45312 fis, clone BRHIP300 5037, moderately similar to Metastasis-associated protein MTA1. [AK127245]                       | 57504 |
| A_24_P297888 | 2.4  | 1.6   | 2.6  | 1.9  | MTAP | Homo sapiens methylthioadenosine phosphorylase (MTAP), mRNA [NM_002451]                                                                         | 4507  |
| A_23_P21278  | -1.8 | -41.8 | -1.0 | -3.1 | MTBP | Mdm2, transformed 3T3 cell double minute 2, p53 binding protein (mouse) binding protein, 104kDa [Source:HGNC Symbol;Acc:7417] [ENST00000522308] | 27085 |

|              |     |      |      |      |         |                                                                                                                 |       |
|--------------|-----|------|------|------|---------|-----------------------------------------------------------------------------------------------------------------|-------|
| A_24_P235012 | 3.1 | 6.5  | 6.8  | 1.3  | MTCH1   | Homo sapiens mitochondrial carrier 1 (MTCH1), nuclear gene encoding mitochondrial protein, mRNA [NM_014341]     | 23787 |
| A_24_P934563 | 1.9 | -1.4 | -1.3 | -2.3 | MTCH2   | Homo sapiens mitochondrial carrier 2 (MTCH2), nuclear gene encoding mitochondrial protein, mRNA [NM_014342]     | 23788 |
| A_23_P43071  | 1.1 | 1.1  | -3.1 | 1.0  | MTERFD1 | Homo sapiens MTERF domain containing 1 (MTERFD1), nuclear gene encoding mitochondrial protein, mRNA [NM_015942] | 51001 |



|              |      |       |      |      |         |                                                                                                    |        |
|--------------|------|-------|------|------|---------|----------------------------------------------------------------------------------------------------|--------|
| A_24_P186124 | -1.0 | -38.5 | -1.1 | -1.0 | MTERFD2 | Homo sapiens MTERF domain containing 2 (MTERFD2), transcript variant 1, mRNA [NM_182501]           | 130916 |
| A_24_P737451 | -2.0 | -2.1  | -2.5 | -2.2 | MTERFD2 | Homo sapiens MTERF domain containing 2 (MTERFD2), transcript variant 2, non-coding RNA [NR_028049] | 130916 |
| A_23_P53530  | 1.1  | 1.1   | -1.1 | -4.1 | MTERFD3 | Homo sapiens MTERF domain containing 3 (MTERFD3), transcript variant 1, mRNA [NM_001033050]        | 80298  |

|             |      |      |      |      |       |                                                                                                                                           |       |
|-------------|------|------|------|------|-------|-------------------------------------------------------------------------------------------------------------------------------------------|-------|
| A_23_P46333 | 2.3  | 2.5  | 1.8  | 1.7  | MTF2  | Homo sapiens metal response element binding transcription factor 2 (MTF2), transcript variant 1, mRNA [NM_007358]                         | 22823 |
| A_23_P29204 | -5.3 | -3.7 | -1.3 | -1.2 | MTFP1 | Homo sapiens mitochondrial fission process 1 (MTFP1), nuclear gene encoding mitochondrial protein, transcript variant 1, mRNA [NM_016498] | 51537 |

|              |      |     |     |     |        |                                                                                                                                                                                   |      |
|--------------|------|-----|-----|-----|--------|-----------------------------------------------------------------------------------------------------------------------------------------------------------------------------------|------|
| A_23_P216215 | -2.0 | 2.3 | 2.0 | 1.6 | MTFR1  | Homo sapiens mitochondrial fission regulator 1 (MTFR1), nuclear gene encoding mitochondrial protein, transcript variant 1, mRNA [NM_014637]                                       | 9650 |
| A_23_P117494 | 1.0  | 6.8 | 1.4 | 5.4 | MTHFD1 | Homo sapiens methylene tetrahydro folate dehydrogenase (NADP+ dependent) 1, methenyltetrahydrofolate cyclohydrolase, formyltetrahydrofolate synthetase (MTHFD1), mRNA [NM_005956] | 4522 |

|              |      |      |      |      |         |                                                                                                                                                                                   |       |
|--------------|------|------|------|------|---------|-----------------------------------------------------------------------------------------------------------------------------------------------------------------------------------|-------|
| A_23_P214908 | -4.3 | -1.2 | -1.3 | -1.4 | MTHFD1L | Homo sapiens methylene tetrahydro folate dehydrogenase (NADP+ dependent) 1-like (MTHFD1L), nuclear gene encoding mitochondrial protein, transcript variant 4, mRNA [NM_001242769] | 25902 |
| A_23_P214907 | -1.0 | -1.0 | 1.3  | -2.0 | MTHFD1L | Homo sapiens methylene tetrahydro folate dehydrogenase (NADP+ dependent) 1-like (MTHFD1L), nuclear gene encoding mitochondrial protein, transcript variant 2, mRNA [NM_015440]    | 25902 |

|              |       |      |      |      |         |                                                                                                                     |        |
|--------------|-------|------|------|------|---------|---------------------------------------------------------------------------------------------------------------------|--------|
| A_23_P112846 | 1.3   | -1.0 | -2.4 | -1.0 | MTHFD2L | Homo sapiens methylene tetrahydro folate dehydrogenase (NADP+ dependent) 2-like (MTHFD2L), mRNA [NM_001144978]      | 441024 |
| A_24_P307314 | 1.4   | -1.7 | 1.2  | -6.3 | MTHFD2L | methylene tetrahydro folate dehydrogenase (NADP+ dependent) 2-like [Source:HGNC Symbol;Acc:31865] [ENST00000423607] | 441024 |
| A_24_P911255 | -15.3 | -7.2 | -1.7 | -1.7 | MTHFR   | methylene tetrahydro folate reductase (NAD(P)H) [Source:HGNC Symbol;Acc:7436] [ENST00000376585]                     | 4524   |

|              |      |      |      |     |       |                                                                                                                                               |       |
|--------------|------|------|------|-----|-------|-----------------------------------------------------------------------------------------------------------------------------------------------|-------|
| A_23_P400081 | -2.1 | -1.0 | -1.1 | 1.0 | MTHFR | Homo sapiens methylene tetrahydro folate reductase (NAD(P)H) (MTHFR), mRNA [NM_005957]                                                        | 4524  |
| A_23_P163380 | -8.5 | 1.1  | -1.0 | 1.0 | MTHFS | Homo sapiens 5,10-methenyltetrahydrofolate synthetase (5-formyltetrahydrofolate cyclo-ligase) (MTHFS), transcript variant 1, mRNA [NM_006441] | 10588 |
| A_24_P290874 | 2.6  | -1.3 | 1.5  | 1.2 | MTMR1 | Homo sapiens myotubularin related protein 1 (MTMR1), mRNA [NM_003828]                                                                         | 8776  |

|              |      |      |      |      |        |                                                                                                  |       |
|--------------|------|------|------|------|--------|--------------------------------------------------------------------------------------------------|-------|
| A_23_P126766 | 1.6  | 2.7  | -1.2 | 1.3  | MTMR11 | Homo sapiens myotubularin related protein 11 (MTMR11), transcript variant 1, mRNA [NM_001145862] | 10903 |
| A_24_P354615 | -1.0 | -2.9 | -1.1 | -1.1 | MTMR12 | Homo sapiens myotubularin related protein 12 (MTMR12), mRNA [NM_001040446]                       | 54545 |
| A_24_P406830 | 1.7  | 1.3  | 2.4  | -1.3 | MTMR2  | Homo sapiens myotubularin related protein 2 (MTMR2), transcript variant 2, mRNA [NM_201278]      | 8898  |
| A_23_P25515  | 1.4  | -2.1 | -1.3 | 1.3  | MTMR6  | Homo sapiens myotubularin related protein 6 (MTMR6), mRNA [NM_004685]                            | 9107  |

|              |      |      |      |      |       |                                                                       |       |
|--------------|------|------|------|------|-------|-----------------------------------------------------------------------|-------|
| A_24_P419211 | 5.1  | 2.9  | 1.2  | -1.1 | MTMR6 | Homo sapiens myotubularin related protein 6 (MTMR6), mRNA [NM_004685] | 9107  |
| A_24_P383095 | -2.5 | -1.0 | -1.1 | -1.2 | MTMR7 | Homo sapiens myotubularin related protein 7 (MTMR7), mRNA [NM_004686] | 9108  |
| A_23_P84995  | 2.3  | 4.1  | 4.6  | 3.5  | MTMR8 | Homo sapiens myotubularin related protein 8 (MTMR8), mRNA [NM_017677] | 55613 |
| A_23_P71389  | -1.7 | -3.6 | -1.2 | -1.6 | MTMR9 | Homo sapiens myotubularin related protein 9 (MTMR9), mRNA [NM_015458] | 66036 |



|              |      |      |      |      |     |                                                                                              |      |
|--------------|------|------|------|------|-----|----------------------------------------------------------------------------------------------|------|
| A_23_P200930 | -1.1 | -1.5 | 1.2  | -2.3 | MTR | Homo sapiens 5-methyltetrahydrofolate-homocysteine methyltransferase (MTR), mRNA [NM_000254] | 4548 |
| A_24_P67806  | 2.0  | 2.2  | -1.0 | 1.8  | MTR | Homo sapiens 5-methyltetrahydrofolate-homocysteine methyltransferase (MTR), mRNA [NM_000254] | 4548 |
| A_23_P200936 | -1.1 | 1.0  | -1.8 | 4.1  | MTR | Homo sapiens 5-methyltetrahydrofolate-homocysteine methyltransferase (MTR), mRNA [NM_000254] | 4548 |

|              |      |      |      |      |       |                                                                                                                                  |      |
|--------------|------|------|------|------|-------|----------------------------------------------------------------------------------------------------------------------------------|------|
| A_24_P349821 | -1.0 | -9.6 | -1.2 | -1.1 | MTRF1 | Homo sapiens mitochondrial translational release factor 1 (MTRF1), nuclear gene encoding mitochondrial protein, mRNA [NM_004294] | 9617 |
| A_23_P37005  | 2.1  | 3.6  | 2.9  | 1.1  | MTRF1 | Homo sapiens mitochondrial translational release factor 1 (MTRF1), nuclear gene encoding mitochondrial protein, mRNA [NM_004294] | 9617 |

|              |      |     |      |      |        |                                                                                                                                                              |       |
|--------------|------|-----|------|------|--------|--------------------------------------------------------------------------------------------------------------------------------------------------------------|-------|
| A_32_P82560  | 2.1  | 2.3 | -1.2 | 1.3  | MTRF1L | Homo sapiens mitochondrial translational release factor 1-like (MTRF1L), nuclear gene encoding mitochondrial protein, transcript variant 1, mRNA [NM_019041] | 54516 |
| A_23_P334308 | -7.2 | 1.9 | -2.9 | -3.8 | MTUS2  | Homo sapiens microtubule associated tumor suppressor candidate 2 (MTUS2), transcript variant 1, mRNA [NM_001033602]                                          | 23281 |

|              |      |      |      |      |       |                                                                                                                    |       |
|--------------|------|------|------|------|-------|--------------------------------------------------------------------------------------------------------------------|-------|
| A_23_P120335 | 2.0  | 2.7  | 1.3  | -1.4 | MTX2  | Homo sapiens metaxin 2 (MTX2), nuclear gene encoding mitochondrial protein, transcript variant 1, mRNA [NM_006554] | 10651 |
| A_23_P137856 | -3.9 | -1.2 | -1.3 | 1.0  | MUC1  | Homo sapiens mucin 1, cell surface associated (MUC1), transcript variant 1, mRNA [NM_002456]                       | 4582  |
| A_24_P798028 | 1.1  | 1.5  | -1.6 | -2.8 | MUC12 | Homo sapiens mucin 12, cell surface associated (MUC12), mRNA [NM_001164462]                                        | 10071 |

|              |      |      |       |      |       |                                                                             |        |
|--------------|------|------|-------|------|-------|-----------------------------------------------------------------------------|--------|
| A_24_P658413 | -1.6 | -4.8 | -1.6  | -1.6 | MUC12 | Homo sapiens mucin 12, cell surface associated (MUC12), mRNA [NM_001164462] | 10071  |
| A_23_P5211   | -1.2 | -4.0 | -1.4  | -1.9 | MUC16 | Homo sapiens mucin 16, cell surface associated (MUC16), mRNA [NM_024690]    | 94025  |
| A_24_P247643 | -1.1 | -1.1 | -10.9 | -1.8 | MUC17 | Homo sapiens mucin 17, cell surface associated (MUC17), mRNA [NM_001040105] | 140453 |
| A_24_P169507 | 2.6  | 1.5  | 23.6  | 3.9  | MUC17 | Homo sapiens mucin 17, cell surface associated (MUC17), mRNA [NM_001040105] | 140453 |

|              |       |      |      |      |       |                                                                             |        |
|--------------|-------|------|------|------|-------|-----------------------------------------------------------------------------|--------|
| A_24_P358875 | -3.8  | 1.0  | -1.0 | -1.0 | MUC17 | Homo sapiens mucin 17, cell surface associated (MUC17), mRNA [NM_001040105] | 140453 |
| A_23_P306610 | -1.1  | -1.2 | -1.1 | -2.3 | MUC17 | Homo sapiens mucin 17, cell surface associated (MUC17), mRNA [NM_001040105] | 140453 |
| A_23_P256784 | -28.9 | -1.0 | -2.0 | -1.7 | MUC2  | Homo sapiens mucin 2, oligomeric mucus/gel-forming (MUC2), mRNA [NM_002457] | 4583   |
| A_24_P341761 | -1.7  | -2.3 | -3.2 | -2.0 | MUC2  | Homo sapiens mucin 2, oligomeric mucus/gel-forming (MUC2), mRNA [NM_002457] | 4583   |

|              |      |      |      |      |       |                                                                                                |           |
|--------------|------|------|------|------|-------|------------------------------------------------------------------------------------------------|-----------|
| A_23_P92222  | -2.9 | 2.4  | 2.5  | -1.4 | MUC20 | Homo sapiens mucin 20, cell surface associated (MUC20), transcript variant L, mRNA [NM_152673] | 200958    |
| A_24_P264507 | -2.6 | 1.5  | -2.6 | -3.9 | MUC22 | Homo sapiens mucin 22 (MUC22), mRNA [NM_001198815]                                             | 100507679 |
| A_24_P630109 | 1.2  | -2.1 | 1.3  | -1.4 | MUC3  | Homo sapiens SIB 297 intestinal mucin (MUC3) mRNA, partial cds. [AF007192]                     | 100133790 |
| A_24_P913828 | -1.3 | -1.5 | -2.3 | -3.1 | MUC3A | Homo sapiens mucin (MUC-3) mRNA, partial cds. [M55405]                                         | 4584      |

|              |      |      |      |      |      |                                                                                              |      |
|--------------|------|------|------|------|------|----------------------------------------------------------------------------------------------|------|
| A_24_P239176 | 2.0  | 2.2  | 1.9  | -1.3 | MUC4 | Homo sapiens mucin 4, cell surface associated (MUC4), transcript variant 1, mRNA [NM_018406] | 4585 |
| A_24_P239183 | -1.5 | 1.3  | -2.3 | -1.1 | MUC4 | Homo sapiens mucin 4, cell surface associated (MUC4), transcript variant 1, mRNA [NM_018406] | 4585 |
| A_24_P239177 | -1.6 | -2.4 | -2.3 | -2.1 | MUC4 | Homo sapiens mucin 4, cell surface associated (MUC4), transcript variant 1, mRNA [NM_018406] | 4585 |
| A_24_P208825 | 3.5  | 2.1  | 3.1  | 5.6  | MUC4 | Homo sapiens mucin 4, cell surface associated (MUC4), transcript variant 1, mRNA [NM_018406] | 4585 |



|              |      |      |      |      |        |                                                                                                       |        |
|--------------|------|------|------|------|--------|-------------------------------------------------------------------------------------------------------|--------|
| A_24_P935054 | -2.5 | 1.7  | -3.3 | 1.7  | MUC5AC | PREDICTED: Homo sapiens mucin 5AC, oligomeric mucus/gel-forming (MUC5AC), mRNA [XM_003119481]         | 4586   |
| A_24_P917886 | 2.9  | 1.8  | -1.0 | 1.6  | MUC5AC | PREDICTED: Homo sapiens mucin 5AC, oligomeric mucus/gel-forming (MUC5AC), partial mRNA [XM_003403637] | 4586   |
| A_24_P548274 | -1.9 | 4.1  | 4.6  | 1.1  | MUC5AC | H.sapiens (MAR11) MUC5AC mRNA for mucin (partial). [Z34282]                                           | 4586   |
| A_23_P305863 | -3.9 | -1.5 | -2.7 | -1.4 | MUC5B  | Homo sapiens mucin 5B, oligomeric mucus/gel-forming (MUC5B), mRNA [NM_002458]                         | 727897 |

|              |      |      |      |      |        |                                                                                                            |        |
|--------------|------|------|------|------|--------|------------------------------------------------------------------------------------------------------------|--------|
| A_24_P102650 | 1.3  | -3.3 | -2.2 | 1.2  | MUC5B  | Homo sapiens mucin 5B, oligomeric mucus/gel-forming (MUC5B), mRNA [NM_002458]                              | 727897 |
| A_24_P916789 | 1.2  | 2.4  | 2.9  | 2.3  | MUC5B  | Homo sapiens mucin 5B, oligomeric mucus/gel-forming (MUC5B), mRNA [NM_002458]                              | 727897 |
| A_23_P150979 | -2.3 | 1.0  | -1.0 | -1.0 | MUCL1  | Homo sapiens mucin-like 1 (MUCL1), mRNA [NM_058173]                                                        | 118430 |
| A_23_P37265  | 1.3  | 1.2  | -2.2 | -2.4 | MUDENG | Homo sapiens MU-2/AP1M2 domain containing, death-inducing (MUDENG), transcript variant 1, mRNA [NM_018229] | 55745  |

|              |      |      |      |      |       |                                                                                                     |       |
|--------------|------|------|------|------|-------|-----------------------------------------------------------------------------------------------------|-------|
| A_23_P208961 | -1.0 | -5.4 | -1.0 | -1.0 | MUM1  | Homo sapiens melanoma associated antigen (mutated) 1 (MUM1), transcript variant 1, mRNA [NM_032853] | 84939 |
| A_24_P194755 | 1.0  | 1.0  | -3.7 | 1.8  | MUM1  | Homo sapiens melanoma associated antigen (mutated) 1 (MUM1), transcript variant 1, mRNA [NM_032853] | 84939 |
| A_23_P161628 | 2.4  | 2.4  | 2.4  | 2.5  | MUS81 | Homo sapiens MUS81 endonuclease homolog (S. cerevisiae) (MUS81), mRNA [NM_025128]                   | 80198 |

|              |      |       |      |      |       |                                                                                                        |       |
|--------------|------|-------|------|------|-------|--------------------------------------------------------------------------------------------------------|-------|
| A_24_P412238 | 4.1  | 4.1   | 2.8  | 3.3  | MUS81 | Homo sapiens MUS81 endonuclease homolog (S. cerevisiae) (MUS81), mRNA [NM_025128]                      | 80198 |
| A_23_P71649  | 2.4  | 1.5   | -1.2 | 1.3  | MUSK  | Homo sapiens muscle, skeletal, receptor tyrosine kinase (MUSK), transcript variant 1, mRNA [NM_005592] | 4593  |
| A_24_P910898 | -1.7 | -10.6 | -1.4 | -6.6 | MUTYH | Homo sapiens mutY homolog (E. coli) (MUTYH), transcript variant gamma3, mRNA [NM_001048173]            | 4595  |

|              |      |     |      |      |      |                                                                                        |       |
|--------------|------|-----|------|------|------|----------------------------------------------------------------------------------------|-------|
| A_23_P152125 | -5.0 | 1.4 | -1.1 | -1.2 | MVD  | Homo sapiens mevalonate (diphospho) decarboxylase (MVD), mRNA [NM_002461]              | 4597  |
| A_23_P105592 | 2.7  | 2.1 | 1.2  | 1.5  | MVK  | Homo sapiens mevalonate kinase (MVK), transcript variant 1, mRNA [NM_000431]           | 4598  |
| A_23_P88819  | 1.7  | 5.2 | 4.2  | 3.0  | MVP  | Homo sapiens major vault protein (MVP), transcript variant 1, mRNA [NM_017458]         | 9961  |
| A_23_P124559 | 2.4  | 2.4 | 2.4  | 2.3  | MXD3 | Homo sapiens MAX dimerization protein 3 (MXD3), transcript variant 1, mRNA [NM_031300] | 83463 |

|              |      |      |      |       |       |                                                                                           |       |
|--------------|------|------|------|-------|-------|-------------------------------------------------------------------------------------------|-------|
| A_24_P417706 | -1.3 | -1.5 | -3.0 | 1.4   | MXD3  | Homo sapiens MAX dimerization protein 3 (MXD3), transcript variant 2, mRNA [NM_001142935] | 83463 |
| A_23_P423695 | -1.6 | -3.6 | 1.6  | -1.1  | MXD4  | Homo sapiens MAX dimerization protein 4 (MXD4), mRNA [NM_006454]                          | 10608 |
| A_24_P234732 | -1.4 | 1.3  | -1.4 | -14.6 | MXD4  | Homo sapiens MAX dimerization protein 4 (MXD4), mRNA [NM_006454]                          | 10608 |
| A_23_P258136 | -5.7 | 1.1  | -1.9 | 1.2   | MXRA5 | Homo sapiens matrix-remodelling associated 5 (MXRA5), mRNA [NM_015419]                    | 25878 |

|              |     |     |      |      |       |                                                                                                 |        |
|--------------|-----|-----|------|------|-------|-------------------------------------------------------------------------------------------------|--------|
| A_24_P810697 | 3.7 | 2.0 | 2.0  | 2.5  | MXRA7 | Homo sapiens matrix-remodelling associated 7 (MXRA7), transcript variant 2, mRNA [NM_001008529] | 439921 |
| A_24_P324314 | 1.7 | 2.9 | 2.9  | -2.0 | MXRA7 | Homo sapiens matrix-remodelling associated 7 (MXRA7), transcript variant 2, mRNA [NM_001008529] | 439921 |
| A_23_P32444  | 2.0 | 1.2 | -1.3 | 1.8  | MXRA8 | Homo sapiens matrix-remodelling associated 8 (MXRA8), mRNA [NM_032348]                          | 54587  |

|              |      |      |      |      |        |                                                                                                           |        |
|--------------|------|------|------|------|--------|-----------------------------------------------------------------------------------------------------------|--------|
| A_24_P134195 | -1.2 | 2.6  | 1.3  | -1.3 | MYADM  | Homo sapiens myeloid-associated differentiation marker (MYADM), transcript variant 1, mRNA [NM_001020818] | 91663  |
| A_23_P399112 | 1.7  | 2.2  | 1.4  | -1.1 | MYADM  | Homo sapiens myeloid-associated differentiation marker (MYADM), transcript variant 1, mRNA [NM_001020818] | 91663  |
| A_32_P332    | -2.2 | -4.9 | -1.2 | -1.5 | MYADML | Homo sapiens myeloid-associated differentiation marker-like (MYADML), non-coding RNA [NR_003143]          | 151325 |



|              |     |     |      |     |         |                                                                                                                            |        |
|--------------|-----|-----|------|-----|---------|----------------------------------------------------------------------------------------------------------------------------|--------|
| A_24_P110331 | 1.3 | 1.3 | 2.4  | 1.2 | MYADML2 | Homo sapiens myeloid-associated differentiation marker-like 2 (MYADML2), mRNA [NM_001145113]                               | 255275 |
| A_23_P78170  | 1.6 | 1.7 | -7.5 | 1.3 | MYBBP1A | Homo sapiens MYB binding protein (P160) 1a (MYBBP1A), transcript variant 2, mRNA [NM_014520]                               | 10514  |
| A_23_P43157  | 2.6 | 3.6 | 3.1  | 1.6 | MYBL1   | Homo sapiens v-myb myeloblastosis viral oncogene homolog (avian)-like 1 (MYBL1), transcript variant 1, mRNA [NM_001080416] | 4603   |

|              |     |      |      |      |        |                                                                                                                            |      |
|--------------|-----|------|------|------|--------|----------------------------------------------------------------------------------------------------------------------------|------|
| A_24_P911928 | 1.3 | 1.8  | -2.3 | -1.6 | MYBL1  | Homo sapiens v-myb myeloblastosis viral oncogene homolog (avian)-like 1 (MYBL1), transcript variant 2, mRNA [NM_001144755] | 4603 |
| A_23_P143190 | 1.7 | -6.7 | 1.4  | 1.6  | MYBL2  | Homo sapiens v-myb myeloblastosis viral oncogene homolog (avian)-like 2 (MYBL2), mRNA [NM_002466]                          | 4605 |
| A_23_P128362 | 1.1 | 1.0  | -3.4 | 1.0  | MYBPC1 | Homo sapiens myosin binding protein C, slow type (MYBPC1), transcript variant 2, mRNA [NM_206819]                          | 4604 |

|              |      |      |      |      |         |                                                                                     |       |
|--------------|------|------|------|------|---------|-------------------------------------------------------------------------------------|-------|
| A_23_P16262  | -1.2 | 1.3  | 1.1  | -2.7 | MYBPC2  | Homo sapiens myosin binding protein C, fast type (MYBPC2), mRNA [NM_004533]         | 4606  |
| A_23_P148737 | -6.8 | -1.1 | 1.0  | -1.4 | MYBPH   | Homo sapiens myosin binding protein H (MYBPH), mRNA [NM_004997]                     | 4608  |
| A_24_P178011 | -4.1 | 1.2  | 1.4  | -1.2 | MYC     | Human c-myc-P64 mRNA, initiating from promoter P0, (HLmyc3.1) partial cds. [M13930] | 4609  |
| A_24_P323815 | -2.2 | 1.9  | -3.4 | -2.0 | MYCBP2  | Homo sapiens MYC binding protein 2 (MYCBP2), mRNA [NM_015057]                       | 23077 |
| A_23_P141415 | 1.2  | 1.2  | 1.1  | -3.9 | MYCBPAP | Homo sapiens MYCBP associated protein (MYCBPAP), mRNA [NM_032133]                   | 84073 |

|              |      |      |      |      |        |                                                                                                                                              |        |
|--------------|------|------|------|------|--------|----------------------------------------------------------------------------------------------------------------------------------------------|--------|
| A_23_P160668 | 1.5  | 2.0  | 1.4  | -1.1 | MYCL1  | Homo sapiens v-myc myelocytomatosis viral oncogene homolog 1, lung carcinoma derived (avian) (MYCL1), transcript variant 3, mRNA [NM_005376] | 4610   |
| A_24_P945059 | -3.8 | 1.1  | 1.1  | -1.4 | MYCT1  | Homo sapiens myc target 1 (MYCT1), mRNA [NM_025107]                                                                                          | 80177  |
| A_23_P377212 | -1.0 | -2.2 | -5.3 | -1.0 | MYEOV2 | Homo sapiens myeloma overexpressed 2 (MYEOV2), transcript variant 1, mRNA [NM_138336]                                                        | 150678 |
| A_23_P87860  | 3.7  | 1.0  | -1.1 | -1.1 | MYF5   | Homo sapiens myogenic factor 5 (MYF5), mRNA [NM_005593]                                                                                      | 4617   |

|              |      |      |      |      |       |                                                                                     |      |
|--------------|------|------|------|------|-------|-------------------------------------------------------------------------------------|------|
| A_23_P49657  | 1.1  | 1.1  | -3.5 | -2.3 | MYH1  | Homo sapiens myosin, heavy chain 1, skeletal muscle, adult (MYH1), mRNA [NM_005963] | 4619 |
| A_24_P256764 | -1.5 | -1.0 | -3.2 | -1.2 | MYH10 | Homo sapiens myosin, heavy chain 10, non-muscle (MYH10), mRNA [NM_005964]           | 4628 |
| A_24_P34168  | -5.7 | 1.2  | 1.1  | -1.0 | MYH10 | Homo sapiens myosin, heavy chain 10, non-muscle (MYH10), mRNA [NM_005964]           | 4628 |
| A_23_P164081 | -1.0 | -1.0 | 2.3  | 1.6  | MYH10 | Homo sapiens myosin, heavy chain 10, non-muscle (MYH10), mRNA [NM_005964]           | 4628 |

|             |      |      |      |      |       |                                                                                                           |       |
|-------------|------|------|------|------|-------|-----------------------------------------------------------------------------------------------------------|-------|
| A_23_P89334 | 2.2  | 1.1  | 1.1  | -1.5 | MYH13 | Homo sapiens myosin, heavy chain 13, skeletal muscle (MYH13), mRNA [NM_003802]                            | 8735  |
| A_23_P78734 | -2.5 | -2.2 | -5.1 | -1.1 | MYH14 | Homo sapiens myosin, heavy chain 14, non-muscle (MYH14), transcript variant 1, mRNA [NM_001077186]        | 79784 |
| A_24_P11900 | 3.8  | -1.3 | 3.3  | 4.1  | MYH15 | Homo sapiens myosin, heavy chain 15 (MYH15), mRNA [NM_014981]                                             | 22989 |
| A_23_P38271 | -1.0 | -1.0 | -2.0 | -1.0 | MYH2  | Homo sapiens myosin, heavy chain 2, skeletal muscle, adult (MYH2), transcript variant 1, mRNA [NM_017534] | 4620  |

|              |       |      |       |      |       |                                                                                     |       |
|--------------|-------|------|-------|------|-------|-------------------------------------------------------------------------------------|-------|
| A_24_P934145 | -1.6  | -1.6 | -5.5  | -1.2 | MYH6  | Homo sapiens myosin, heavy chain 6, cardiac muscle, alpha (MYH6), mRNA [NM_002471]  | 4624  |
| A_23_P37164  | 136.2 | 98.8 | 101.4 | 60.3 | MYH6  | Homo sapiens myosin, heavy chain 6, cardiac muscle, alpha (MYH6), mRNA [NM_002471]  | 4624  |
| A_24_P130621 | 2.0   | -1.9 | 1.5   | -1.0 | MYH7B | Homo sapiens myosin, heavy chain 7B, cardiac muscle, beta (MYH7B), mRNA [NM_020884] | 57644 |
| A_23_P57497  | 1.1   | 1.9  | 3.0   | 2.4  | MYH9  | Homo sapiens myosin, heavy chain 9, non-muscle (MYH9), mRNA [NM_002473]             | 4627  |

|              |      |      |      |      |        |                                                                                                   |        |
|--------------|------|------|------|------|--------|---------------------------------------------------------------------------------------------------|--------|
| A_23_P4572   | -1.2 | 2.5  | -2.1 | 1.2  | MYL12A | Homo sapiens myosin, light chain 12A, regulatory, non-sarcomeric (MYL12A), mRNA [NM_006471]       | 10627  |
| A_32_P42925  | -1.3 | -2.2 | -2.2 | -2.4 | MYL12B | Homo sapiens myosin, light chain 12B, regulatory (MYL12B), transcript variant 2, mRNA [NM_033546] | 103910 |
| A_23_P162547 | -1.1 | -1.3 | -1.7 | -2.6 | MYL2   | Homo sapiens myosin, light chain 2, regulatory, cardiac, slow (MYL2), mRNA [NM_000432]            | 4633   |



|              |      |      |      |      |       |                                                                                                                           |        |
|--------------|------|------|------|------|-------|---------------------------------------------------------------------------------------------------------------------------|--------|
| A_23_P155638 | -1.8 | -1.4 | -3.0 | -3.6 | MYL3  | Homo sapiens myosin, light chain 3, alkali; ventricular, skeletal, slow (MYL3), mRNA [NM_000258]                          | 4634   |
| A_24_P188218 | 1.0  | -1.0 | -1.1 | -9.2 | MYL4  | Homo sapiens myosin, light chain 4, alkali; atrial, embryonic (MYL4), transcript variant 2, mRNA [NM_002476]              | 4635   |
| A_23_P2223   | 3.1  | 5.9  | 3.8  | 1.7  | MYL6B | Homo sapiens myosin, light chain 6B, alkali, smooth muscle and non-muscle (MYL6B), transcript variant 2, mRNA [NM_002475] | 140465 |

|              |      |      |      |      |       |                                                                                               |       |
|--------------|------|------|------|------|-------|-----------------------------------------------------------------------------------------------|-------|
| A_23_P210425 | -1.2 | -2.3 | -1.3 | -1.0 | MYL9  | Homo sapiens myosin, light chain 9, regulatory (MYL9), transcript variant 2, mRNA [NM_181526] | 10398 |
| A_24_P917123 | 1.1  | 1.1  | -1.0 | -2.7 | MYLIP | Homo sapiens myosin regulatory light chain interacting protein (MYLIP), mRNA [NM_013262]      | 29116 |
| A_24_P319923 | 1.1  | 1.0  | -4.2 | 1.1  | MYLK  | Homo sapiens myosin light chain kinase (MYLK), transcript variant 1, mRNA [NM_053025]         | 4638  |
| A_23_P143817 | 1.2  | 1.2  | -7.9 | 5.7  | MYLK  | Homo sapiens myosin light chain kinase (MYLK), transcript variant 1, mRNA [NM_053025]         | 4638  |

|              |      |       |      |      |       |                                                                                                   |       |
|--------------|------|-------|------|------|-------|---------------------------------------------------------------------------------------------------|-------|
| A_23_P80008  | 4.6  | 4.7   | 2.0  | 6.8  | MYLK2 | Homo sapiens myosin light chain kinase 2 (MYLK2), mRNA [NM_033118]                                | 85366 |
| A_24_P194707 | -1.6 | -26.9 | -1.0 | 1.1  | MYLK3 | Homo sapiens myosin light chain kinase 3 (MYLK3), mRNA [NM_182493]                                | 91807 |
| A_23_P60742  | -1.1 | 1.9   | 2.1  | -3.2 | MYLPF | Homo sapiens myosin light chain, phosphorylatable, fast skeletal muscle (MYLPF), mRNA [NM_013292] | 29895 |
| A_24_P260254 | 1.1  | 1.0   | -2.4 | 1.1  | MYNN  | Homo sapiens myoneurin (MYNN), transcript variant 2, mRNA [NM_001185118]                          | 55892 |
| A_24_P46357  | 1.1  | -1.8  | -9.8 | 1.0  | MYO10 | Homo sapiens myosin X (MYO10), mRNA [NM_012334]                                                   | 4651  |

|              |      |      |      |      |        |                                                                              |        |
|--------------|------|------|------|------|--------|------------------------------------------------------------------------------|--------|
| A_24_P335759 | 3.1  | 3.0  | 2.8  | 2.9  | MYO15A | Homo sapiens myosin XVA (MYO15A), mRNA [NM_016239]                           | 51168  |
| A_24_P369898 | 1.4  | 2.6  | 1.3  | 1.0  | MYO15B | Homo sapiens cDNA clone IMAGE:40078433. [BC128044]                           | 80022  |
| A_24_P195669 | -1.4 | -2.9 | 2.0  | -1.6 | MYO15B | Homo sapiens cDNA FLJ90199 fis, clone MAMMA1001609. [AK074680]               | 80022  |
| A_23_P78122  | -1.0 | -1.1 | -1.2 | -4.0 | MYO18A | Homo sapiens myosin XVIII A (MYO18A), transcript variant 1, mRNA [NM_078471] | 399687 |
| A_23_P68846  | 1.0  | 2.0  | 1.0  | -1.3 | MYO18B | Homo sapiens myosin XVIII B (MYO18B), mRNA [NM_032608]                       | 84700  |

|              |      |      |      |      |       |                                                                            |       |
|--------------|------|------|------|------|-------|----------------------------------------------------------------------------|-------|
| A_23_P100868 | -3.0 | -1.7 | 1.1  | 1.6  | MYO19 | Homo sapiens myosin XIX (MYO19), transcript variant 3, mRNA [NM_001033580] | 80179 |
| A_23_P162288 | -4.4 | 1.6  | 1.0  | -1.1 | MYO1A | Homo sapiens myosin IA (MYO1A), mRNA [NM_005379]                           | 4640  |
| A_23_P361049 | -8.0 | 1.0  | -1.0 | -1.0 | MYO1B | Homo sapiens myosin IB (MYO1B), transcript variant 2, mRNA [NM_012223]     | 4430  |
| A_24_P7143   | -4.1 | -1.7 | -1.4 | -2.5 | MYO1B | Homo sapiens myosin IB (MYO1B), transcript variant 2, mRNA [NM_012223]     | 4430  |
| A_23_P164022 | -2.1 | -1.2 | -1.6 | -1.3 | MYO1C | Homo sapiens myosin IC (MYO1C), transcript variant 3, mRNA [NM_033375]     | 4641  |

|              |      |      |      |      |       |                                                                          |        |
|--------------|------|------|------|------|-------|--------------------------------------------------------------------------|--------|
| A_23_P37503  | 1.7  | 2.0  | 1.3  | 4.0  | MYO1E | Homo sapiens myosin IE (MYO1E), mRNA [NM_004998]                         | 4643   |
| A_23_P142447 | -1.7 | 1.4  | 2.0  | 1.6  | MYO1F | Homo sapiens myosin IF (MYO1F), mRNA [NM_012335]                         | 4542   |
| A_24_P323610 | 2.5  | 1.8  | -1.1 | 1.4  | MYO1F | Homo sapiens myosin IF (MYO1F), mRNA [NM_012335]                         | 4542   |
| A_24_P110770 | -5.1 | -1.5 | -1.0 | -1.0 | MYO1G | myosin IG [Source:HGNC Symbol;Acc:13880] [ENST00000480503]               | 64005  |
| A_32_P78059  | -3.3 | -1.5 | -1.7 | -1.6 | MYO1H | Homo sapiens myosin IH (MYO1H), mRNA [NM_001101421]                      | 283446 |
| A_23_P417853 | -1.0 | -2.8 | -1.0 | 1.0  | MYO3B | Homo sapiens myosin IIIB (MYO3B), transcript variant 2, mRNA [NM_138995] | 140469 |

|              |      |      |      |      |       |                                                                          |      |
|--------------|------|------|------|------|-------|--------------------------------------------------------------------------|------|
| A_23_P101193 | 1.0  | -1.3 | 13.7 | -1.0 | MYO5B | Homo sapiens myosin VB (MYO5B), mRNA [NM_001080467]                      | 4645 |
| A_23_P255952 | 1.1  | 1.1  | -2.9 | 1.0  | MYO6  | Homo sapiens myosin VI (MYO6), mRNA [NM_004999]                          | 4646 |
| A_24_P283225 | 3.3  | 1.1  | 4.1  | 1.3  | MYO6  | Homo sapiens myosin VI (MYO6), mRNA [NM_004999]                          | 4646 |
| A_23_P98786  | 3.4  | 1.8  | 1.7  | 1.4  | MYO7A | Homo sapiens myosin VIIA (MYO7A), transcript variant 1, mRNA [NM_000260] | 4647 |
| A_23_P209799 | -1.2 | 2.4  | 1.9  | 1.2  | MYO7B | Homo sapiens myosin VIIB (MYO7B), mRNA [NM_001080527]                    | 4648 |

|              |      |      |      |      |       |                                                                        |       |
|--------------|------|------|------|------|-------|------------------------------------------------------------------------|-------|
| A_24_P53241  | 1.4  | 1.0  | -3.4 | -1.0 | MYOCD | Homo sapiens myocardin (MYOCD), transcript variant 2, mRNA [NM_153604] | 93649 |
| A_24_P30257  | -1.8 | -7.2 | -5.9 | -1.7 | MYOD1 | Homo sapiens myogenic differentiation 1 (MYOD1), mRNA [NM_002478]      | 4654  |
| A_24_P282309 | -2.1 | 2.3  | 1.2  | 1.1  | MYOF  | Homo sapiens myoferlin (MYOF), transcript variant 2, mRNA [NM_133337]  | 26509 |
| A_23_P86682  | -3.9 | -1.1 | -1.1 | -4.5 | MYOF  | Homo sapiens myoferlin (MYOF), transcript variant 1, mRNA [NM_013451]  | 26509 |
| A_24_P311036 | 1.5  | 1.6  | -3.7 | -1.6 | MYOG  | Homo sapiens myogenin (myogenic factor 4) (MYOG), mRNA [NM_002479]     | 4656  |



|              |      |      |      |      |       |                                                                                 |        |
|--------------|------|------|------|------|-------|---------------------------------------------------------------------------------|--------|
| A_23_P160438 | 1.5  | 2.6  | 2.3  | 1.4  | MYOG  | Homo sapiens myogenin (myogenic factor 4) (MYOG), mRNA [NM_002479]              | 4656   |
| A_23_P96271  | -1.5 | -1.3 | -1.2 | -2.1 | MYOM1 | Homo sapiens myomesin 1, 185kDa (MYOM1), transcript variant 1, mRNA [NM_003803] | 8736   |
| A_23_P258912 | -3.0 | -1.0 | -1.0 | -1.0 | MYOM2 | Homo sapiens myomesin (M-protein) 2, 165kDa (MYOM2), mRNA [NM_003970]           | 9172   |
| A_23_P51215  | 3.1  | 1.1  | -1.1 | -1.7 | MYOM3 | Homo sapiens myomesin family, member 3 (MYOM3), mRNA [NM_152372]                | 127294 |
| A_32_P88415  | -1.0 | -1.9 | 1.4  | -3.1 | MYOZ3 | Homo sapiens myozenin 3 (MYOZ3), transcript variant 2, mRNA [NM_133371]         | 91977  |

|              |      |      |      |      |       |                                                                                   |       |
|--------------|------|------|------|------|-------|-----------------------------------------------------------------------------------|-------|
| A_23_P104438 | 1.3  | 2.5  | 1.8  | -1.5 | MYPN  | Homo sapiens myopalladin (MYPN), mRNA [NM_032578]                                 | 84665 |
| A_23_P398712 | 9.5  | 9.4  | 6.0  | 9.4  | MYT1L | Homo sapiens myelin transcription factor 1-like (MYT1L), mRNA [NM_015025]         | 23040 |
| A_23_P130455 | 2.6  | -1.3 | 1.2  | -1.1 | MZF1  | Homo sapiens myeloid zinc finger 1 (MZF1), transcript variant 2, mRNA [NM_198055] | 7593  |
| A_23_P432610 | 1.3  | 1.0  | 1.1  | -2.6 | N4BP1 | Homo sapiens NEDD4 binding protein 1 (N4BP1), mRNA [NM_153029]                    | 9683  |
| A_23_P309779 | -1.3 | 1.1  | -1.1 | -2.3 | N4BP2 | Homo sapiens NEDD4 binding protein 2 (N4BP2), mRNA [NM_018177]                    | 55728 |

|              |      |      |      |      |         |                                                                                                                       |       |
|--------------|------|------|------|------|---------|-----------------------------------------------------------------------------------------------------------------------|-------|
| A_24_P222114 | -1.1 | -1.0 | -2.3 | -1.1 | N4BP2   | Homo sapiens NEDD4 binding protein 2 (N4BP2), mRNA [NM_018177]                                                        | 55728 |
| A_23_P65262  | 5.5  | 2.2  | 10.7 | 12.5 | N4BP2L2 | Homo sapiens NEDD4 binding protein 2-like 2 (N4BP2L2), transcript variant 1, mRNA [NM_033111]                         | 10443 |
| A_23_P80086  | -3.3 | -1.3 | -1.7 | -4.7 | N6AMT1  | Homo sapiens N-6 adenine-specific DNA methyltransferase 1 (putative) (N6AMT1), transcript variant 1, mRNA [NM_013240] | 29104 |

|              |       |      |      |      |        |                                                                                                 |        |
|--------------|-------|------|------|------|--------|-------------------------------------------------------------------------------------------------|--------|
| A_23_P151368 | -13.9 | -5.4 | -1.3 | -1.7 | N6AMT2 | Homo sapiens N-6 adenine-specific DNA methyltransferase 2 (putative) (N6AMT2), mRNA [NM_174928] | 221143 |
| A_23_P155890 | -1.4  | 2.3  | 2.8  | 1.1  | NAA11  | Homo sapiens N(alpha)-acetyltransferase 11, NatA catalytic subunit (NAA11), mRNA [NM_032693]    | 84779  |
| A_23_P25868  | -4.4  | 1.0  | -1.1 | -1.0 | NAA30  | Homo sapiens N(alpha)-acetyltransferase 30, NatC catalytic subunit (NAA30), mRNA [NM_001011713] | 122830 |
| A_24_P63969  | 3.3   | 3.1  | 2.9  | 3.1  | NAA38  | Homo sapiens N(alpha)-acetyltransferase 38, NatC auxiliary subunit (NAA38), mRNA [NM_016200]    | 51691  |

|             |      |      |      |      |       |                                                                                                                       |       |
|-------------|------|------|------|------|-------|-----------------------------------------------------------------------------------------------------------------------|-------|
| A_32_P72466 | 4.3  | 4.1  | 4.0  | 4.0  | NAA40 | Homo sapiens N(alpha)-acetyltransferase 40, NatD catalytic subunit, homolog (S. cerevisiae) (NAA40), mRNA [NM_024771] | 79829 |
| A_23_P35782 | -3.3 | 1.3  | -2.6 | -1.0 | NAA40 | Homo sapiens N(alpha)-acetyltransferase 40, NatD catalytic subunit, homolog (S. cerevisiae) (NAA40), mRNA [NM_024771] | 79829 |
| A_23_P89113 | -5.5 | -1.8 | -1.8 | -1.0 | NAA60 | Homo sapiens N(alpha)-acetyltransferase 60, NatF catalytic subunit (NAA60), transcript variant 2, mRNA [NM_024845]    | 79903 |

|              |      |      |      |      |          |                                                                                                 |       |
|--------------|------|------|------|------|----------|-------------------------------------------------------------------------------------------------|-------|
| A_24_P25520  | 1.1  | 2.1  | -1.6 | -2.4 | NAALAD2  | N-acetylated alpha-linked acidic dipeptidase 2 [Source:HGNC Symbol;Acc:14526] [ENST00000529090] | 10003 |
| A_23_P52668  | -7.5 | -1.3 | -1.4 | -1.4 | NAALADL1 | Homo sapiens N-acetylated alpha-linked acidic dipeptidase-like 1 (NAALADL1), mRNA [NM_005468]   | 10004 |
| A_24_P191417 | -3.2 | -3.3 | -3.4 | -3.2 | NAB1     | Homo sapiens NGFI-A binding protein 1 (EGR1 binding protein 1) (NAB1), mRNA [NM_005966]         | 4664  |

|              |      |      |      |      |      |                                                                                                                    |      |
|--------------|------|------|------|------|------|--------------------------------------------------------------------------------------------------------------------|------|
| A_23_P368187 | -1.1 | -2.1 | -1.9 | -1.8 | NAB2 | Homo sapiens NGFI-A binding protein 2 (EGR1 binding protein 2) (NAB2), mRNA [NM_005967]                            | 4665 |
| A_23_P162228 | -1.3 | 1.1  | 1.0  | -4.1 | NACA | Homo sapiens nascent polypeptide-associated complex alpha subunit (NACA), transcript variant 1, mRNA [NM_00113203] | 4666 |
| A_24_P102043 | 4.7  | 5.3  | -1.2 | 1.7  | NACA | nascent polypeptide-associated complex alpha subunit [Source:HGNC Symbol;Acc:7629] [ENST00000454682]               | 4666 |

|              |      |      |      |      |       |                                                                                                            |        |
|--------------|------|------|------|------|-------|------------------------------------------------------------------------------------------------------------|--------|
| A_23_P93938  | 1.2  | -9.0 | 1.3  | -1.3 | NACAD | Homo sapiens NAC alpha domain containing (NACAD), mRNA [NM_001146334]                                      | 23148  |
| A_23_P142518 | -4.7 | -2.1 | -1.5 | -1.1 | NACC1 | Homo sapiens nucleus accumbens associated 1, BEN and BTB (POZ) domain containing (NACC1), mRNA [NM_052876] | 112939 |
| A_24_P271285 | 10.5 | -1.2 | 2.8  | 1.2  | NACC1 | Homo sapiens nucleus accumbens associated 1, BEN and BTB (POZ) domain containing (NACC1), mRNA [NM_052876] | 112939 |



|              |      |       |      |      |         |                                                                                                  |        |
|--------------|------|-------|------|------|---------|--------------------------------------------------------------------------------------------------|--------|
| A_23_P113825 | 1.5  | -1.5  | -2.0 | 2.7  | NACC2   | Homo sapiens NACC family member 2, BEN and BTB (POZ) domain containing (NACC2), mRNA [NM_144653] | 138151 |
| A_24_P389994 | 3.2  | 2.5   | 3.5  | 2.2  | NADK    | Homo sapiens NAD kinase (NADK), transcript variant 1, mRNA [NM_023018]                           | 65220  |
| A_23_P35848  | -1.0 | -1.0  | -2.3 | -1.1 | NADSYN1 | Homo sapiens NAD synthetase 1 (NADSYN1), mRNA [NM_018161]                                        | 55191  |
| A_24_P376029 | 1.4  | -12.7 | 1.2  | 1.7  | NAG18   | Homo sapiens NAG18 (NAG18) mRNA, complete cds. [AF210651]                                        | 57051  |

|              |      |      |      |      |       |                                                                                                           |           |
|--------------|------|------|------|------|-------|-----------------------------------------------------------------------------------------------------------|-----------|
| A_24_P307599 | 1.2  | 2.9  | -1.8 | -1.0 | NAG20 | PREDICTE<br>D: Homo sapiens NAG20 (NAG20), miscRNA [XR_108823]                                            | 100129703 |
| A_24_P116571 | 6.4  | 8.2  | 9.3  | 5.5  | NAGPA | Homo sapiens N-acetylglucosamine-1-phosphodiester alpha-N-acetylglucosaminidase (NAGPA), mRNA [NM_016256] | 51172     |
| A_23_P38041  | 1.9  | -1.0 | 2.2  | 2.0  | NAGPA | Homo sapiens N-acetylglucosamine-1-phosphodiester alpha-N-acetylglucosaminidase (NAGPA), mRNA [NM_016256] | 51172     |
| A_23_P405794 | -1.6 | 1.3  | -3.4 | -1.1 | NAGS  | Homo sapiens N-acetylglutamate synthase (NAGS), mRNA [NM_153006]                                          | 162417    |

|              |     |      |      |       |        |                                                                               |        |
|--------------|-----|------|------|-------|--------|-------------------------------------------------------------------------------|--------|
| A_23_P406187 | 3.4 | -1.4 | 1.1  | 1.3   | NAGS   | Homo sapiens N-acetylglutamate synthase (NAGS), mRNA [NM_153006]              | 162417 |
| A_32_P79396  | 1.6 | -1.3 | -1.7 | -64.1 | NAMPT  | Homo sapiens nicotinamide phosphoribosyltransferase (NAMPT), mRNA [NM_005746] | 10135  |
| A_24_P383609 | 1.5 | 1.1  | -2.2 | 1.1   | NANOS1 | Homo sapiens nanos homolog 1 (Drosophila) (NANOS1), mRNA [NM_199461]          | 340719 |
| A_24_P703830 | 3.9 | 3.2  | 5.7  | 1.4   | NANOS3 | Homo sapiens nanos homolog 3 (Drosophila) (NANOS3), mRNA [NM_001098622]       | 342977 |

|              |      |       |      |      |        |                                                                                                    |        |
|--------------|------|-------|------|------|--------|----------------------------------------------------------------------------------------------------|--------|
| A_23_P427039 | -4.2 | -18.4 | -4.4 | -4.3 | NANP   | Homo sapiens N-acetylneuraminic acid phosphatase (NANP), mRNA [NM_152667]                          | 140838 |
| A_32_P82409  | -1.4 | 1.0   | 1.0  | -2.1 | NAP1L1 | Homo sapiens nucleosome assembly protein 1-like 1 (NAP1L1), transcript variant 2, mRNA [NM_004537] | 4673   |
| A_24_P166073 | 1.1  | 1.4   | 2.1  | -1.0 | NAP1L5 | Homo sapiens nucleosome assembly protein 1-like 5 (NAP1L5), mRNA [NM_153757]                       | 266812 |

|              |      |      |      |      |         |                                                                                                                         |        |
|--------------|------|------|------|------|---------|-------------------------------------------------------------------------------------------------------------------------|--------|
| A_23_P55990  | -1.3 | 2.2  | 1.4  | 1.1  | NAPA    | Homo sapiens N-ethylmaleimide-sensitive factor attachment protein, alpha (NAPA), transcript variant 1, mRNA [NM_003827] | 8775   |
| A_23_P109193 | -1.0 | -1.1 | -1.1 | -2.7 | NAPB    | Homo sapiens N-ethylmaleimide-sensitive factor attachment protein, beta (NAPB), mRNA [NM_022080]                        | 63908  |
| A_32_P105637 | 8.0  | 25.7 | 22.6 | 17.7 | NAPEPLD | Homo sapiens N-acyl phosphatidylethanolamine phospholipase D (NAPEPLD), transcript variant 2, mRNA [NM_198990]          | 222236 |

|              |      |      |      |       |        |                                                                                                  |        |
|--------------|------|------|------|-------|--------|--------------------------------------------------------------------------------------------------|--------|
| A_23_P43238  | 2.3  | -2.6 | 3.0  | 2.6   | NAPRT1 | Homo sapiens nicotinate phosphoribosyltransferase domain containing 1 (NAPRT1), mRNA [NM_145201] | 93100  |
| A_32_P107029 | -2.3 | -1.4 | -1.4 | -1.2  | NAPSA  | Homo sapiens napsin A aspartic peptidase (NAPSA), mRNA [NM_004851]                               | 9476   |
| A_23_P90125  | 1.2  | 2.8  | 2.1  | 2.6   | NAPSB  | Homo sapiens napsin B aspartic peptidase pseudogene (NAPSB), non-coding RNA [NR_002798]          | 256236 |
| A_23_P37877  | -1.2 | -1.6 | 1.2  | -21.0 | NARFL  | Homo sapiens nuclear prelamin A recognition factor-like (NARFL), mRNA [NM_022493]                | 64428  |

|              |      |      |      |      |       |                                                                                                  |       |
|--------------|------|------|------|------|-------|--------------------------------------------------------------------------------------------------|-------|
| A_23_P50389  | 3.1  | -1.2 | 1.0  | 2.9  | NAT14 | Homo sapiens N-acetyltransferase 14 (GCN5-related, putative) (NAT14), mRNA [NM_020378]           | 57106 |
| A_23_P31798  | 1.2  | 1.2  | -3.8 | 1.1  | NAT2  | Homo sapiens N-acetyltransferase 2 (arylamine N-acetyltransferase) (NAT2), mRNA [NM_000015]      | 10    |
| A_23_P212400 | 1.4  | -5.1 | 1.3  | -1.0 | NAT6  | Homo sapiens N-acetyltransferase 6 (GCN5-related) (NAT6), transcript variant 1, mRNA [NM_012191] | 24142 |
| A_23_P103561 | -4.0 | -1.7 | 1.3  | -1.0 | NAV1  | Homo sapiens neuron navigator 1 (NAV1), transcript variant 1, mRNA [NM_020443]                   | 89796 |

|              |      |      |      |      |      |                                                                                                 |       |
|--------------|------|------|------|------|------|-------------------------------------------------------------------------------------------------|-------|
| A_24_P102880 | 1.0  | 1.5  | -3.6 | -1.1 | NAV1 | Homo sapiens neuron navigator 1 (NAV1), transcript variant 1, mRNA [NM_020443]                  | 89796 |
| A_24_P248147 | -1.7 | -2.7 | 1.0  | -1.7 | NAV2 | Homo sapiens partial mRNA for steerin2 protein (STEERIN2 gene), alternative exon 1c. [AJ488204] | 89797 |
| A_23_P354791 | -1.0 | -1.7 | -2.1 | -1.8 | NAV2 | Homo sapiens neuron navigator 2 (NAV2), transcript variant 1, mRNA [NM_182964]                  | 89797 |
| A_23_P90752  | 1.1  | -2.3 | -1.0 | -4.1 | NBAS | Homo sapiens neuroblastoma amplified sequence (NBAS), mRNA [NM_015909]                          | 51594 |



|              |      |       |      |      |        |                                                                                               |       |
|--------------|------|-------|------|------|--------|-----------------------------------------------------------------------------------------------|-------|
| A_24_P100792 | 1.3  | 1.9   | 1.6  | 2.1  | NBEAL1 | neurobeac<br>hin-like 1<br>[Source:H<br>GNC<br>Symbol;Ac<br>c:20681]<br>[ENST0000<br>0460355] | 65065 |
| A_24_P272160 | 1.2  | 1.6   | 2.9  | 1.6  | NBEAL2 | neurobeac<br>hin-like 2<br>[Source:H<br>GNC<br>Symbol;Ac<br>c:31928]<br>[ENST0000<br>0296147] | 23218 |
| A_23_P409168 | -1.1 | -4.1  | 1.8  | 1.1  | NBEAL2 | Homo<br>sapiens<br>neurobeac<br>hin-like 2<br>(NBEAL2),<br>mRNA<br>[NM_0151<br>75]            | 23218 |
| A_24_P566932 | -1.0 | -10.0 | -1.1 | -1.0 | NBPF1  | Homo<br>sapiens<br>cDNA<br>FLJ41266<br>fis, clone<br>BRAMY20<br>35869.<br>[AK123260<br>]      | 55672 |

|              |      |      |      |      |        |                                                                                                                   |           |
|--------------|------|------|------|------|--------|-------------------------------------------------------------------------------------------------------------------|-----------|
| A_24_P287272 | 7.9  | 7.7  | 7.1  | 7.4  | NBPF1  | Homo sapiens neuroblastoma breakpoint family, member 1, mRNA (cDNA clone IMAGE:3896523), complete cds. [BC034418] | 55672     |
| A_32_P171181 | -5.1 | -1.8 | -1.8 | -1.7 | NBPF10 | Homo sapiens neuroblastoma breakpoint family, member 10 (NBPF10), mRNA [NM_001039703]                             | 100132406 |
| A_32_P27020  | 1.1  | -3.2 | -1.1 | 1.0  | NBPF15 | Homo sapiens neuroblastoma breakpoint family, member 15 (NBPF15), transcript variant 2, mRNA [NM_173638]          | 284565    |

|              |      |      |      |      |         |                                                                                                           |        |
|--------------|------|------|------|------|---------|-----------------------------------------------------------------------------------------------------------|--------|
| A_23_P399251 | -1.3 | -2.1 | -3.7 | -1.2 | NBPF22P | Homo sapiens neuroblastoma breakpoint family, member 22, pseudogene (NBPF22P), non-coding RNA [NR_003719] | 285622 |
| A_32_P88635  | -6.8 | -1.2 | -1.2 | -1.5 | NBPF3   | Homo sapiens neuroblastoma breakpoint family, member 3 (NBPF3), mRNA [NM_032264]                          | 84224  |
| A_24_P301454 | 1.2  | 1.4  | 3.0  | 1.2  | NBR2    | Homo sapiens neighbor of BRCA1 gene 2 (non-protein coding) (NBR2), non-coding RNA [NR_003108]             | 10230  |

|              |      |      |      |      |       |                                                                                                 |       |
|--------------|------|------|------|------|-------|-------------------------------------------------------------------------------------------------|-------|
| A_23_P4160   | 1.0  | -2.3 | -2.1 | 1.4  | NBR2  | Homo sapiens neighbor of BRCA1 gene 2 (non-protein coding) (NBR2), non-coding RNA [NR_003108]   | 10230 |
| A_23_P203053 | -5.2 | -2.9 | -2.4 | -3.1 | NCAM1 | Homo sapiens neural cell adhesion molecule 1 (NCAM1), transcript variant 3, mRNA [NM_001076682] | 4684  |
| A_23_P1740   | 2.4  | 1.2  | 1.5  | 1.7  | NCAM1 | Homo sapiens neural cell adhesion molecule 1 (NCAM1), transcript variant 3, mRNA [NM_001076682] | 4684  |
| A_23_P415443 | 2.7  | 3.3  | 2.5  | 2.6  | NCAPH | Homo sapiens non-SMC condensin I complex, subunit H (NCAPH), mRNA [NM_015341]                   | 23397 |

|              |      |     |      |     |        |                                                                                                        |        |
|--------------|------|-----|------|-----|--------|--------------------------------------------------------------------------------------------------------|--------|
| A_23_P369960 | 5.0  | 1.1 | 1.0  | 1.0 | NCAPH2 | Homo sapiens non-SMC condensin II complex, subunit H2 (NCAPH2), transcript variant 1, mRNA [NM_014551] | 29781  |
| A_23_P257104 | -4.8 | 2.7 | 2.7  | 6.4 | NCBP1  | Homo sapiens nuclear cap binding protein subunit 1, 80kDa (NCBP1), mRNA [NM_002486]                    | 4686   |
| A_23_P42746  | 1.6  | 1.5 | 2.6  | 2.0 | NCF1   | Homo sapiens neutrophil cytosolic factor 1 (NCF1), mRNA [NM_000265]                                    | 653361 |
| A_32_P116203 | 1.7  | 2.3 | -1.3 | 2.2 | NCF1   | Homo sapiens neutrophil cytosolic factor 1 (NCF1), mRNA [NM_000265]                                    | 653361 |

|              |      |      |      |      |        |                                                                                             |        |
|--------------|------|------|------|------|--------|---------------------------------------------------------------------------------------------|--------|
| A_23_P138194 | 2.0  | 2.0  | 2.0  | 2.1  | NCF2   | Homo sapiens neutrophil cytosolic factor 2 (NCF2), transcript variant 1, mRNA [NM_000433]   | 4688   |
| A_24_P298224 | 8.8  | 8.6  | 5.5  | 8.3  | NCKAP5 | Homo sapiens NCK-associated protein 5 (NCKAP5), transcript variant 2, mRNA [NM_207481]      | 344148 |
| A_24_P50934  | -1.0 | -4.6 | -1.6 | -2.1 | NCKAP5 | Homo sapiens cDNA FLJ34870 fis, clone NT2NE2014651. [AK092189]                              | 344148 |
| A_23_P86424  | 3.0  | -1.1 | -1.3 | -1.2 | NCOA4  | Homo sapiens nuclear receptor coactivator 4 (NCOA4), transcript variant 5, mRNA [NM_005437] | 8031   |

|              |     |      |      |      |       |                                                                                             |        |
|--------------|-----|------|------|------|-------|---------------------------------------------------------------------------------------------|--------|
| A_23_P86421  | 2.4 | 5.9  | 10.6 | 5.8  | NCOA4 | Homo sapiens nuclear receptor coactivator 4 (NCOA4), transcript variant 5, mRNA [NM_005437] | 8031   |
| A_23_P259135 | 1.0 | -1.6 | -2.1 | -1.0 | NCOA6 | Homo sapiens nuclear receptor coactivator 6 (NCOA6), transcript variant 1, mRNA [NM_014071] | 23054  |
| A_23_P156957 | 1.9 | 2.6  | 2.3  | -1.2 | NCOA7 | Homo sapiens nuclear receptor coactivator 7 (NCOA7), transcript variant 1, mRNA [NM_181782] | 135112 |
| A_24_P911017 | 1.5 | 2.0  | -2.1 | -1.6 | NCOR1 | nuclear receptor corepressor 1 [Source:HGNC Symbol;Acc:7672] [ENST00000436068]              | 9611   |

|              |      |      |      |     |            |                                                                                                           |        |
|--------------|------|------|------|-----|------------|-----------------------------------------------------------------------------------------------------------|--------|
| A_23_P251881 | -1.0 | -1.0 | -2.8 | 1.2 | NCR3       | Homo sapiens natural cytotoxicity triggering receptor 3 (NCR3), transcript variant 1, mRNA [NM_147130]    | 259197 |
| A_32_P468522 | 3.4  | 3.4  | 2.9  | 1.2 | NCR3       | Homo sapiens natural cytotoxicity triggering receptor 3 (NCR3), transcript variant 3, mRNA [NM_001145467] | 259197 |
| A_23_P73848  | 1.6  | 1.6  | 3.2  | 1.7 | NCRNA00185 | Homo sapiens non-protein coding RNA 185 (NCRNA00185), non-coding RNA [NR_001544]                          | 55410  |



|              |      |      |      |      |     |                                                                                              |      |
|--------------|------|------|------|------|-----|----------------------------------------------------------------------------------------------|------|
| A_23_P331028 | -1.3 | 1.3  | -2.3 | -3.6 | ND1 | mitochondrially encoded NADH dehydrogenase 1 [Source:HGNC Symbol;Acc:7455] [ENST00000361390] | 4535 |
| A_23_P431853 | 1.7  | -1.1 | 2.1  | 1.4  | ND2 | mitochondrially encoded NADH dehydrogenase 2 [Source:HGNC Symbol;Acc:7456] [ENST00000361453] | 4536 |
| A_23_P360209 | 1.9  | 4.0  | -1.1 | -1.1 | ND3 | mitochondrially encoded NADH dehydrogenase 3 [Source:HGNC Symbol;Acc:7458] [ENST00000361227] | 4537 |

|              |      |      |      |      |     |                                                                                              |      |
|--------------|------|------|------|------|-----|----------------------------------------------------------------------------------------------|------|
| A_23_P315252 | -2.0 | 1.0  | -1.1 | -1.3 | ND4 | mitochondrially encoded NADH dehydrogenase 4 [Source:HGNC Symbol;Acc:7459] [ENST00000361381] | 4538 |
| A_24_P710024 | -1.0 | -1.0 | -1.2 | -2.0 | ND4 | mitochondrially encoded NADH dehydrogenase 4 [Source:HGNC Symbol;Acc:7459] [ENST00000361381] | 4538 |
| A_23_P406928 | 1.4  | 1.7  | -3.3 | -1.0 | ND5 | mitochondrially encoded NADH dehydrogenase 5 [Source:HGNC Symbol;Acc:7461] [ENST00000361567] | 4540 |

|              |      |      |      |      |        |                                                                                                                      |       |
|--------------|------|------|------|------|--------|----------------------------------------------------------------------------------------------------------------------|-------|
| A_23_P206901 | 1.0  | -4.0 | 1.0  | 1.0  | NDE1   | Homo sapiens nudE nuclear distribution gene E homolog 1 (A. nidulans) (NDE1), transcript variant 2, mRNA [NM_017668] | 54820 |
| A_24_P209113 | -1.7 | -2.7 | -1.7 | -1.2 | NDFIP1 | Homo sapiens Nedd4 family interacting protein 1 (NDFIP1), mRNA [NM_030571]                                           | 80762 |
| A_24_P264909 | 5.4  | 1.3  | -1.1 | 1.5  | NDFIP2 | Homo sapiens Nedd4 family interacting protein 2 (NDFIP2), transcript variant 1, mRNA [NM_019080]                     | 54602 |
| A_23_P106405 | 1.3  | 1.3  | 2.0  | -1.0 | NDN    | Homo sapiens necdin homolog (mouse) (NDN), mRNA [NM_002487]                                                          | 4692  |

|              |     |      |      |      |       |                                                                                                        |       |
|--------------|-----|------|------|------|-------|--------------------------------------------------------------------------------------------------------|-------|
| A_24_P124973 | 1.0 | -3.0 | 1.0  | -2.3 | NDNL2 | Homo sapiens neccdin-like 2 (NDNL2), mRNA [NM_138704]                                                  | 56160 |
| A_24_P267748 | 2.0 | 3.2  | -1.4 | 1.5  | NDOR1 | Homo sapiens NADPH dependent diflavin oxidoreductase 1 (NDOR1), transcript variant 2, mRNA [NM_014434] | 27158 |
| A_23_P73609  | 1.5 | 2.6  | 1.0  | 1.3  | NDP   | Homo sapiens Norrie disease (pseudoglioma) (NDP), mRNA [NM_000266]                                     | 4693  |
| A_24_P38387  | 2.0 | 1.6  | -2.1 | 1.6  | NDRG1 | Homo sapiens N-myc downstream regulated 1 (NDRG1), transcript variant 2, mRNA [NM_006096]              | 10397 |

|              |     |      |      |      |       |                                                                                                  |       |
|--------------|-----|------|------|------|-------|--------------------------------------------------------------------------------------------------|-------|
| A_23_P20494  | 1.2 | -1.0 | -1.0 | -3.3 | NDRG1 | Homo sapiens N-myc downstream regulated 1 (NDRG1), transcript variant 2, mRNA [NM_006096]        | 10397 |
| A_23_P37205  | 2.8 | 2.5  | 2.8  | 1.7  | NDRG2 | Homo sapiens NDRG family member 2 (NDRG2), transcript variant 1, mRNA [NM_201535]                | 57447 |
| A_23_P140748 | 1.4 | 2.0  | 1.7  | 1.1  | NDRG4 | Homo sapiens NDRG family member 4 (NDRG4), transcript variant 3, mRNA [NM_022910]                | 65009 |
| A_23_P30429  | 1.0 | -2.2 | 1.3  | 1.2  | NDST1 | Homo sapiens N-deacetylase/N-sulfotransferase (heparan glucosaminyl) 1 (NDST1), mRNA [NM_001543] | 3340  |

|              |     |     |      |      |         |                                                                                                                                                     |      |
|--------------|-----|-----|------|------|---------|-----------------------------------------------------------------------------------------------------------------------------------------------------|------|
| A_24_P85365  | 1.4 | 1.1 | -4.1 | -1.0 | NDST2   | Homo sapiens N-deacetylase/N-sulfotransferase (heparan glucosaminyl) 2 (NDST2), mRNA [NM_003635]                                                    | 8509 |
| A_24_P396889 | 1.0 | 1.0 | -7.6 | 1.3  | NDUFA10 | Homo sapiens NADH dehydrogenase (ubiquinone) 1 alpha subcomplex, 10, 42kDa (NDUFA10), nuclear gene encoding mitochondrial protein, mRNA [NM_004544] | 4705 |

|              |      |      |      |      |         |                                                                                                                                                     |      |
|--------------|------|------|------|------|---------|-----------------------------------------------------------------------------------------------------------------------------------------------------|------|
| A_23_P120182 | 2.5  | -1.1 | -2.6 | -2.0 | NDUFA10 | Homo sapiens NADH dehydrogenase (ubiquinone) 1 alpha subcomplex, 10, 42kDa (NDUFA10), nuclear gene encoding mitochondrial protein, mRNA [NM_004544] | 4705 |
| A_24_P316489 | -7.3 | -1.6 | -1.1 | -1.1 | NDUFA10 | Homo sapiens NADH dehydrogenase (ubiquinone) 1 alpha subcomplex, 10, 42kDa (NDUFA10), nuclear gene encoding mitochondrial protein, mRNA [NM_004544] | 4705 |

|              |     |      |      |     |         |                                                                                                                                                                             |        |
|--------------|-----|------|------|-----|---------|-----------------------------------------------------------------------------------------------------------------------------------------------------------------------------|--------|
| A_23_P320185 | 1.4 | -1.1 | -1.1 | 2.3 | NDUFA11 | Homo sapiens NADH dehydrogenase (ubiquinone) 1 alpha subcomplex, 11, 14.7kDa (NDUFA11), nuclear gene encoding mitochondrial protein, transcript variant 1, mRNA [NM_175614] | 126328 |
| A_23_P208540 | 1.3 | -7.0 | 1.7  | 2.0 | NDUFA3  | Homo sapiens NADH dehydrogenase (ubiquinone) 1 alpha subcomplex, 3, 9kDa (NDUFA3), mRNA [NM_004542]                                                                         | 4696   |



|              |     |      |       |      |        |                                                                                                                                                  |      |
|--------------|-----|------|-------|------|--------|--------------------------------------------------------------------------------------------------------------------------------------------------|------|
| A_32_P98313  | 1.0 | -9.3 | -6.2  | -1.1 | NDUFA4 | Homo sapiens NADH dehydrogenase (ubiquinone) 1 alpha subcomplex, 4, 9kDa (NDUFA4), nuclear gene encoding mitochondrial protein, mRNA [NM_002489] | 4697 |
| A_23_P412041 | 1.1 | 1.1  | -19.1 | 1.2  | NDUFA5 | NADH dehydrogenase (ubiquinone) 1 alpha subcomplex, 5, 13kDa [Source:HGNC Symbol;Acc:7688] [ENST0000340034]                                      | 4698 |

|              |     |      |      |     |        |                                                                                                                                                   |      |
|--------------|-----|------|------|-----|--------|---------------------------------------------------------------------------------------------------------------------------------------------------|------|
| A_32_P96641  | 2.1 | 2.1  | 2.0  | 2.0 | NDUFA5 | Homo sapiens NADH dehydrogenase (ubiquinone) 1 alpha subcomplex, 5, 13kDa (NDUFA5), nuclear gene encoding mitochondrial protein, mRNA [NM_005000] | 4698 |
| A_23_P215751 | 1.0 | -1.1 | -1.6 | 4.2 | NDUFA5 | Homo sapiens NADH dehydrogenase (ubiquinone) 1 alpha subcomplex, 5, 13kDa (NDUFA5), nuclear gene encoding mitochondrial protein, mRNA [NM_005000] | 4698 |

|              |      |      |      |      |         |                                                                                                                                                                                   |       |
|--------------|------|------|------|------|---------|-----------------------------------------------------------------------------------------------------------------------------------------------------------------------------------|-------|
| A_32_P49555  | 2.2  | 2.1  | 2.5  | 2.1  | NDUFAF2 | Homo sapiens NADH dehydrogenase (ubiquinone) 1 alpha subcomplex, assembly factor 2 (NDUFAF2), nuclear gene encoding mitochondrial protein, mRNA [NM_174889]                       | 91942 |
| A_23_P256172 | -1.1 | -2.6 | -2.5 | -1.0 | NDUFAF3 | Homo sapiens NADH dehydrogenase (ubiquinone) 1 alpha subcomplex, assembly factor 3 (NDUFAF3), nuclear gene encoding mitochondrial protein, transcript variant 1, mRNA [NM_199069] | 25915 |

|              |     |     |     |     |         |                                                                                                                                                             |       |
|--------------|-----|-----|-----|-----|---------|-------------------------------------------------------------------------------------------------------------------------------------------------------------|-------|
| A_24_P46659  | 1.8 | 4.9 | 1.2 | 7.9 | NDUFAF4 | Homo sapiens NADH dehydrogenase (ubiquinone) 1 alpha subcomplex, assembly factor 4 (NDUFAF4), nuclear gene encoding mitochondrial protein, mRNA [NM_014165] | 29078 |
| A_23_P140423 | 2.8 | 2.3 | 2.0 | 2.0 | NDUFB1  | Homo sapiens NADH dehydrogenase (ubiquinone) 1 beta subcomplex, 1, 7kDa (NDUFB1), nuclear gene encoding mitochondrial protein, mRNA [NM_004545]             | 4707  |

|              |     |     |     |     |         |                                                                                                                                                                            |       |
|--------------|-----|-----|-----|-----|---------|----------------------------------------------------------------------------------------------------------------------------------------------------------------------------|-------|
| A_23_P118105 | 2.2 | 1.1 | 1.1 | 1.1 | NDUFB10 | Homo sapiens NADH dehydrogenase (ubiquinone) 1 beta subcomplex, 10, 22kDa (NDUFB10), nuclear gene encoding mitochondrial protein, mRNA [NM_004548]                         | 4716  |
| A_23_P22765  | 1.8 | 1.5 | 1.3 | 2.8 | NDUFB11 | Homo sapiens NADH dehydrogenase (ubiquinone) 1 beta subcomplex, 11, 17.3kDa (NDUFB11), nuclear gene encoding mitochondrial protein, transcript variant 1, mRNA [NM_019056] | 54539 |

|             |     |     |      |     |        |                                                                                                                                                  |      |
|-------------|-----|-----|------|-----|--------|--------------------------------------------------------------------------------------------------------------------------------------------------|------|
| A_23_P50872 | 1.6 | 1.7 | 2.1  | 1.4 | NDUFB7 | Homo sapiens NADH dehydrogenase (ubiquinone) 1 beta subcomplex, 7, 18kDa (NDUFB7), nuclear gene encoding mitochondrial protein, mRNA [NM_004146] | 4713 |
| A_24_P14434 | 1.1 | 1.8 | -2.3 | 1.6 | NDUFB7 | Homo sapiens NADH dehydrogenase (ubiquinone) 1 beta subcomplex, 7, 18kDa (NDUFB7), nuclear gene encoding mitochondrial protein, mRNA [NM_004146] | 4713 |

|              |      |      |      |      |        |                                                                                                                                                                                              |      |
|--------------|------|------|------|------|--------|----------------------------------------------------------------------------------------------------------------------------------------------------------------------------------------------|------|
| A_24_P346886 | -1.0 | -1.4 | -1.1 | -5.5 | NDUFB8 | Homo sapiens NADH dehydrogenase (ubiquinone) 1 beta subcomplex, 8, 19kDa (NDUFB8), nuclear gene encoding mitochondrial protein, mRNA [NM_005004]                                             | 4714 |
| A_23_P149470 | 1.4  | 2.7  | 3.4  | 1.1  | NDUFS2 | Homo sapiens NADH dehydrogenase (ubiquinone) Fe-S protein 2, 49kDa (NADH-coenzyme Q reductase) (NDUFS2), nuclear gene encoding mitochondrial protein, transcript variant 1, mRNA [NM_004550] | 4720 |

|              |      |      |      |      |        |                                                                                                                                                                        |        |
|--------------|------|------|------|------|--------|------------------------------------------------------------------------------------------------------------------------------------------------------------------------|--------|
| A_24_P128020 | 1.4  | 5.0  | 4.8  | 1.4  | NDUFS4 | Homo sapiens OK/SW-cl.89 mRNA, complete cds. [AB062482]                                                                                                                | 4724   |
| A_23_P165086 | -1.1 | -6.4 | -3.4 | -9.6 | NDUFS7 | Homo sapiens NADH dehydrogenase (ubiquinone) Fe-S protein 7, 20kDa (NADH-coenzyme Q reductase) (NDUFS7), nuclear gene encoding mitochondrial protein, mRNA [NM_024407] | 374291 |
| A_23_P68628  | -2.2 | -2.4 | 1.0  | -1.8 | NECAB3 | Homo sapiens N-terminal EF-hand calcium binding protein 3 (NECAB3), transcript variant 2, mRNA [NM_031232]                                                             | 63941  |



|              |      |     |      |     |        |                                                                                                                         |       |
|--------------|------|-----|------|-----|--------|-------------------------------------------------------------------------------------------------------------------------|-------|
| A_24_P116132 | 1.6  | 1.2 | -1.4 | 2.3 | NECAP1 | Homo sapiens<br>NECAP<br>endocytosis<br>associated<br>1<br>(NECAP1),<br>transcript<br>variant 1,<br>mRNA<br>[NM_015509] | 25977 |
| A_23_P97296  | 1.0  | 4.8 | -1.0 | 1.1 | NECAP2 | Homo sapiens<br>NECAP<br>endocytosis<br>associated<br>2<br>(NECAP2),<br>transcript<br>variant 1,<br>mRNA<br>[NM_018090] | 55707 |
| A_24_P302332 | -1.6 | 1.5 | 2.2  | 1.8 | NECAP2 | Homo sapiens<br>NECAP<br>endocytosis<br>associated<br>2<br>(NECAP2),<br>transcript<br>variant 1,<br>mRNA<br>[NM_018090] | 55707 |

|              |      |      |      |      |       |                                                                                                                                |      |
|--------------|------|------|------|------|-------|--------------------------------------------------------------------------------------------------------------------------------|------|
| A_23_P331379 | -1.0 | -2.4 | -1.1 | -1.1 | NEDD4 | Homo sapiens neural precursor cell expressed, developmentally down-regulated 4 (NEDD4), transcript variant 2, mRNA [NM_198400] | 4734 |
| A_32_P160883 | 2.0  | 2.0  | 1.4  | 2.0  | NEDD4 | Homo sapiens neural precursor cell expressed, developmentally down-regulated 4 (NEDD4), transcript variant 2, mRNA [NM_198400] | 4734 |

|              |     |       |      |     |        |                                                                                                                                         |       |
|--------------|-----|-------|------|-----|--------|-----------------------------------------------------------------------------------------------------------------------------------------|-------|
| A_24_P782308 | 1.0 | -14.9 | 1.0  | 1.0 | NEDD4L | Homo sapiens neural precursor cell expressed, developmentally down-regulated 4-like (NEDD4L), transcript variant j, mRNA [NM_001144967] | 23327 |
| A_24_P108311 | 1.0 | -1.0  | -6.7 | 1.0 | NEDD4L | Homo sapiens neural precursor cell expressed, developmentally down-regulated 4-like (NEDD4L), transcript variant d, mRNA [NM_015277]    | 23327 |

|              |     |     |      |     |        |                                                                                                                                      |       |
|--------------|-----|-----|------|-----|--------|--------------------------------------------------------------------------------------------------------------------------------------|-------|
| A_23_P387856 | 2.0 | 1.9 | -1.9 | 1.3 | NEDD4L | Homo sapiens neural precursor cell expressed, developmentally down-regulated 4-like (NEDD4L), transcript variant d, mRNA [NM_015277] | 23327 |
| A_24_P159135 | 3.7 | 2.8 | -1.3 | 1.8 | NEDD8  | Homo sapiens neural precursor cell expressed, developmentally down-regulated 8 (NEDD8), mRNA [NM_006156]                             | 4738  |

|              |      |      |      |      |       |                                                                                                                                |      |
|--------------|------|------|------|------|-------|--------------------------------------------------------------------------------------------------------------------------------|------|
| A_24_P710090 | -2.7 | -1.0 | -1.1 | -1.1 | NEDD8 | neural precursor cell expressed, developmentally down-regulated 8 [Source:HGNC Symbol;Acc:7732] [ENST00000533242]              | 4738 |
| A_23_P344555 | 1.9  | 1.8  | -2.6 | -7.5 | NEDD9 | Homo sapiens neural precursor cell expressed, developmentally down-regulated 9 (NEDD9), transcript variant 1, mRNA [NM_006403] | 4739 |
| A_24_P264832 | 1.2  | 2.4  | 1.1  | 1.1  | NEFM  | Homo sapiens neurofilament, medium polypeptide (NEFM), transcript variant 1, mRNA [NM_005382]                                  | 4741 |

|              |      |       |      |      |       |                                                                                                             |       |
|--------------|------|-------|------|------|-------|-------------------------------------------------------------------------------------------------------------|-------|
| A_23_P129157 | 3.2  | 1.8   | 1.6  | 3.0  | NEIL1 | Homo sapiens nei endonuclease VIII-like 1 (E. coli) (NEIL1), mRNA [NM_024608]                               | 79661 |
| A_23_P155711 | 1.4  | -13.6 | 1.0  | -2.3 | NEIL3 | Homo sapiens nei endonuclease VIII-like 3 (E. coli) (NEIL3), mRNA [NM_018248]                               | 55247 |
| A_24_P914599 | 1.0  | -1.0  | -1.1 | -4.5 | NEK1  | H.sapiens protein-serine/threonine kinase gene, complete CDS. [Z25431]                                      | 4750  |
| A_32_P68050  | -2.5 | -1.0  | 1.0  | 1.1  | NEK1  | Homo sapiens NIMA (never in mitosis gene a)-related kinase 1 (NEK1), transcript variant 2, mRNA [NM_012224] | 4750  |

|              |       |      |      |      |       |                                                                                                               |       |
|--------------|-------|------|------|------|-------|---------------------------------------------------------------------------------------------------------------|-------|
| A_23_P124427 | -4.3  | 1.0  | 1.0  | 1.1  | NEK1  | Homo sapiens NIMA (never in mitosis gene a)-related kinase 1 (NEK1), transcript variant 2, mRNA [NM_012224]   | 4750  |
| A_24_P50882  | 1.0   | -3.3 | -1.1 | -1.1 | NEK1  | NIMA (never in mitosis gene a)-related kinase 1 [Source:HGNC Symbol;Acc:7744] [ENST00000509912]               | 4750  |
| A_23_P155301 | -14.0 | 1.0  | 1.0  | 1.0  | NEK11 | Homo sapiens NIMA (never in mitosis gene a)-related kinase 11 (NEK11), transcript variant 2, mRNA [NM_145910] | 79858 |

|              |      |      |      |      |      |                                                                                                             |       |
|--------------|------|------|------|------|------|-------------------------------------------------------------------------------------------------------------|-------|
|              |      |      |      |      |      | Homo sapiens NIMA (never in mitosis gene a)-related kinase 3 (NEK3), transcript variant 1, mRNA [NM_002498] |       |
| A_23_P333705 | 1.0  | 1.0  | -2.3 | 1.0  | NEK3 |                                                                                                             | 4752  |
| A_24_P921966 | -1.0 | -2.0 | -1.2 | -5.5 | NEK3 |                                                                                                             | 4752  |
|              |      |      |      |      |      | Homo sapiens NIMA (never in mitosis gene a)-related kinase 4 (NEK4), transcript variant 1, mRNA [NM_003157] |       |
| A_24_P80338  | -1.1 | -1.1 | -4.0 | -1.5 | NEK4 |                                                                                                             | 6787  |
|              |      |      |      |      |      | Homo sapiens NIMA (never in mitosis gene a)-related kinase 6 (NEK6), transcript variant 2, mRNA [NM_014397] |       |
| A_23_P216920 | -1.9 | -6.3 | -1.8 | -3.1 | NEK6 |                                                                                                             | 10783 |



|              |      |     |      |      |      |                                                                                       |        |
|--------------|------|-----|------|------|------|---------------------------------------------------------------------------------------|--------|
| A_23_P201619 | 1.2  | 2.4 | -1.1 | -1.8 | NEK7 | Homo sapiens NIMA (never in mitosis gene a)-related kinase 7 (NEK7), mRNA [NM_133494] | 140609 |
| A_23_P353574 | 3.3  | 2.9 | 1.3  | 1.5  | NEK7 | Homo sapiens NIMA (never in mitosis gene a)-related kinase 7 (NEK7), mRNA [NM_133494] | 140609 |
| A_23_P152873 | 4.0  | 6.1 | 4.7  | -1.0 | NEK8 | Homo sapiens NIMA (never in mitosis gene a)-related kinase 8 (NEK8), mRNA [NM_178170] | 284086 |
| A_23_P3131   | -2.8 | 1.6 | 1.7  | 1.5  | NEK9 | Homo sapiens NIMA (never in mitosis gene a)-related kinase 9 (NEK9), mRNA [NM_033116] | 91754  |

|             |       |      |      |      |       |                                                                                                        |       |
|-------------|-------|------|------|------|-------|--------------------------------------------------------------------------------------------------------|-------|
| A_23_P32064 | 1.3   | 2.3  | 3.0  | 1.8  | NELF  | Homo sapiens nasal embryonic LHRH factor (NELF), transcript variant 2, mRNA [NM_015537]                | 26012 |
| A_23_P73000 | 1.2   | 2.4  | 1.1  | 1.0  | NELF  | Homo sapiens nasal embryonic LHRH factor (NELF), transcript variant 2, mRNA [NM_015537]                | 26012 |
| A_24_P6808  | -7.7  | -2.6 | -5.9 | -2.5 | NEMF  | Homo sapiens nuclear export mediator factor (NEMF), mRNA [NM_004713]                                   | 9147  |
| A_24_P5653  | -56.0 | 1.1  | -1.0 | 1.0  | NETO1 | Homo sapiens neuropilin (NRP) and tolloid (TLL)-like 1 (NETO1), transcript variant 1, mRNA [NM_138999] | 81832 |

|              |      |      |      |      |        |                                                                                                        |        |
|--------------|------|------|------|------|--------|--------------------------------------------------------------------------------------------------------|--------|
| A_23_P4489   | -1.0 | -1.0 | -7.0 | -1.0 | NETO1  | Homo sapiens neuropilin (NRP) and tolloid (TLL)-like 1 (NETO1), transcript variant 3, mRNA [NM_138966] | 81832  |
| A_23_P90980  | 1.4  | 1.4  | 3.3  | 1.0  | NEU2   | Homo sapiens sialidase 2 (cytosolic sialidase) (NEU2), mRNA [NM_005383]                                | 4759   |
| A_24_P246891 | 1.3  | -1.3 | 1.5  | -2.5 | NEU4   | Homo sapiens sialidase 4 (NEU4), transcript variant 1, mRNA [NM_080741]                                | 129807 |
| A_23_P165989 | -2.3 | 1.0  | -1.0 | -1.3 | NEURL2 | Homo sapiens neuralized homolog 2 (Drosophila) (NEURL2), mRNA [NM_080749]                              | 140825 |

|              |      |      |      |      |         |                                                                                               |       |
|--------------|------|------|------|------|---------|-----------------------------------------------------------------------------------------------|-------|
| A_23_P49579  | -2.8 | 1.7  | -1.2 | 1.8  | NEUROD2 | Homo sapiens neurogenic differentiation 2 (NEUROD2), mRNA [NM_006160]                         | 4761  |
| A_23_P87625  | -5.0 | -1.0 | -1.2 | -1.0 | NEUROD4 | Homo sapiens neurogenic differentiation 4 (NEUROD4), mRNA [NM_021191]                         | 58158 |
| A_24_P269101 | 2.9  | 1.4  | 1.3  | -1.6 | NEUROG1 | Homo sapiens neurogenin 1 (NEUROG1), mRNA [NM_006161]                                         | 4762  |
| A_23_P200001 | 1.0  | 1.4  | -1.3 | -7.5 | NEXN    | Homo sapiens nexilin (F actin binding protein) (NEXN), transcript variant 1, mRNA [NM_144573] | 91624 |

|              |       |      |      |      |          |                                                                                             |        |
|--------------|-------|------|------|------|----------|---------------------------------------------------------------------------------------------|--------|
| A_24_P110780 | 3.1   | 3.0  | 2.9  | 3.1  | NEXN-AS1 | PREDICTED: Homo sapiens chromosome 1 open reading frame 118 (C1orf118), miscRNA [XR_110470] | 374987 |
| A_23_P207596 | -11.8 | -2.7 | -5.3 | -3.8 | NF1      | Homo sapiens neurofibromin 1 (NF1), transcript variant 1, mRNA [NM_001042492]               | 4763   |
| A_24_P1919   | 1.7   | 2.3  | -1.7 | 2.4  | NF1      | Homo sapiens neurofibromin 1 (NF1), transcript variant 2, mRNA [NM_000267]                  | 4763   |
| A_24_P917026 | 3.1   | 1.2  | 2.8  | 1.4  | NF1      | Homo sapiens neurofibromin 1 (NF1), transcript variant 1, mRNA [NM_001042492]               | 4763   |

|              |      |      |      |      |       |                                                                                                                         |        |
|--------------|------|------|------|------|-------|-------------------------------------------------------------------------------------------------------------------------|--------|
| A_23_P29199  | 2.8  | 3.6  | 1.6  | 3.9  | NF2   | Homo sapiens neurofibromin 2 (merlin) (NF2), transcript variant 13, mRNA [NM_181831]                                    | 4771   |
| A_23_P17911  | -1.0 | 1.4  | -2.3 | 1.6  | NFAM1 | Homo sapiens NFAT activating protein with ITAM motif 1 (NFAM1), mRNA [NM_145912]                                        | 150372 |
| A_24_P350656 | -5.3 | 1.1  | 1.0  | -1.1 | NFASC | Homo sapiens neurofascin (NFASC), transcript variant 5, mRNA [NM_001005389]                                             | 23114  |
| A_23_P359647 | -3.7 | -1.0 | -3.8 | 1.0  | NFAT5 | Homo sapiens nuclear factor of activated T-cells 5, tonicity-responsive (NFAT5), transcript variant 1, mRNA [NM_138714] | 10725  |

|              |     |     |     |     |        |                                                                                                                                            |      |
|--------------|-----|-----|-----|-----|--------|--------------------------------------------------------------------------------------------------------------------------------------------|------|
| A_24_P525917 | 3.1 | 2.1 | 4.3 | 1.9 | NFATC2 | nuclear factor of activated T-cells, cytoplasmic, calcineurin-dependent 2<br>[Source:HGNC Symbol;Acc:7776]<br>[ENST00000371564]            | 4773 |
| A_23_P91278  | 1.5 | 1.7 | 2.5 | 2.1 | NFATC2 | Homo sapiens nuclear factor of activated T-cells, cytoplasmic, calcineurin-dependent 2 (NFATC2), transcript variant 2, mRNA<br>[NM_173091] | 4773 |

|              |     |      |     |      |          |                                                                                                                                         |       |
|--------------|-----|------|-----|------|----------|-----------------------------------------------------------------------------------------------------------------------------------------|-------|
| A_24_P330625 | 1.3 | -1.8 | 2.0 | 1.1  | NFATC2IP | Homo sapiens nuclear factor of activated T-cells, cytoplasmic, calcineurin-dependent 2 interacting protein (NFATC2IP), mRNA [NM_032815] | 84901 |
| A_23_P77440  | 1.1 | 1.0  | 1.1 | -2.3 | NFATC3   | Homo sapiens nuclear factor of activated T-cells, cytoplasmic, calcineurin-dependent 3 (NFATC3), transcript variant 1, mRNA [NM_173165] | 4775  |



|              |      |      |      |      |        |                                                                                                                                         |      |
|--------------|------|------|------|------|--------|-----------------------------------------------------------------------------------------------------------------------------------------|------|
| A_23_P140394 | 3.9  | 5.9  | -1.9 | -4.0 | NFATC4 | Homo sapiens nuclear factor of activated T-cells, cytoplasmic, calcineurin-dependent 4 (NFATC4), transcript variant 2, mRNA [NM_004554] | 4776 |
| A_24_P930276 | -2.1 | -1.3 | -2.1 | -1.3 | NFE2L1 | Homo sapiens NRF1 protein (NRF1) mRNA. [L24123]                                                                                         | 4779 |
| A_32_P163469 | 1.0  | -2.9 | 1.3  | 1.3  | NFE2L1 | Homo sapiens nuclear factor (erythroid-derived 2)-like 1 (NFE2L1), mRNA [NM_003204]                                                     | 4779 |
| A_32_P155030 | -1.8 | -1.3 | 1.9  | -2.0 | NFIA   | Homo sapiens nuclear factor I/A (NFIA), transcript variant 1, mRNA [NM_001134673]                                                       | 4774 |

|              |      |      |      |      |       |                                                                                   |      |
|--------------|------|------|------|------|-------|-----------------------------------------------------------------------------------|------|
| A_32_P155026 | 1.2  | 2.8  | -3.5 | -1.8 | NFIA  | Homo sapiens nuclear factor I/A (NFIA), transcript variant 1, mRNA [NM_001134673] | 4774 |
| A_24_P804992 | -1.1 | -1.0 | -1.0 | -7.5 | NFIB  | Homo sapiens nuclear factor I/B (NFIB), transcript variant 3, mRNA [NM_005596]    | 4781 |
| A_23_P216448 | 2.4  | 1.6  | 1.5  | 2.4  | NFIB  | Homo sapiens nuclear factor I/B (NFIB), transcript variant 3, mRNA [NM_005596]    | 4781 |
| A_23_P32253  | 1.1  | 1.6  | -3.8 | -1.0 | NFIL3 | Homo sapiens nuclear factor, interleukin 3 regulated (NFIL3), mRNA [NM_005384]    | 4783 |

|              |       |     |      |      |        |                                                                                                                                                 |      |
|--------------|-------|-----|------|------|--------|-------------------------------------------------------------------------------------------------------------------------------------------------|------|
| A_23_P165295 | -26.3 | 1.0 | -1.0 | -1.0 | NFIX   | Homo sapiens nuclear factor I/X (CCAAT-binding transcription factor) (NFIX), mRNA [NM_002501]                                                   | 4784 |
| A_23_P202156 | 1.2   | 2.3 | -1.1 | 1.6  | NFKB2  | Homo sapiens nuclear factor of kappa light polypeptide gene enhancer in B-cells 2 (p49/p100) (NFKB2), transcript variant 3, mRNA [NM_001077493] | 4791 |
| A_23_P106002 | 1.1   | 1.3 | 2.4  | 1.1  | NFKBIA | Homo sapiens nuclear factor of kappa light polypeptide gene enhancer in B-cells inhibitor, alpha (NFKBIA), mRNA [NM_020529]                     | 4792 |

|              |      |      |      |      |        |                                                                                                                                                            |      |
|--------------|------|------|------|------|--------|------------------------------------------------------------------------------------------------------------------------------------------------------------|------|
| A_24_P161086 | 1.0  | 1.0  | -2.3 | -1.1 | NFKBIB | Homo sapiens nuclear factor of kappa light polypeptide gene enhancer in B-cells inhibitor, beta (NFKBIB), transcript variant 3, non-coding RNA [NR_040515] | 4793 |
| A_23_P79086  | -1.2 | -3.0 | -2.3 | 3.0  | NFKBIB | Homo sapiens nuclear factor of kappa light polypeptide gene enhancer in B-cells inhibitor, beta (NFKBIB), transcript variant 1, mRNA [NM_002503]           | 4793 |

|              |      |      |      |      |         |                                                                                                                                                    |       |
|--------------|------|------|------|------|---------|----------------------------------------------------------------------------------------------------------------------------------------------------|-------|
| A_23_P383422 | -3.1 | -1.6 | -1.9 | -1.7 | NFKBID  | Homo sapiens nuclear factor of kappa light polypeptide gene enhancer in B-cells inhibitor, delta (NFKBID), mRNA [NM_139239]                        | 84807 |
| A_23_P145301 | 1.1  | -1.5 | -1.4 | -3.3 | NFKBIL1 | Homo sapiens nuclear factor of kappa light polypeptide gene enhancer in B-cells inhibitor-like 1 (NFKBIL1), transcript variant 1, mRNA [NM_005007] | 4795  |

|              |        |     |     |     |        |                                                                                                                                                  |       |
|--------------|--------|-----|-----|-----|--------|--------------------------------------------------------------------------------------------------------------------------------------------------|-------|
| A_23_P212089 | -165.8 | 1.1 | 1.1 | 1.2 | NFKBIZ | Homo sapiens nuclear factor of kappa light polypeptide gene enhancer in B-cells inhibitor, zeta (NFKBIZ), transcript variant 1, mRNA [NM_031419] | 64332 |
| A_23_P24485  | 1.6    | 4.3 | 1.1 | 3.5 | NFRKB  | Homo sapiens nuclear factor related to kappaB binding protein (NFRKB), transcript variant 2, mRNA [NM_006165]                                    | 4798  |

|              |      |      |      |     |      |                                                                                                                                                                    |       |
|--------------|------|------|------|-----|------|--------------------------------------------------------------------------------------------------------------------------------------------------------------------|-------|
| A_23_P147296 | 2.3  | 2.2  | 2.1  | 1.3 | NFU1 | Homo sapiens NFU1 iron-sulfur cluster scaffold homolog (S. cerevisiae) (NFU1), nuclear gene encoding mitochondrial protein, transcript variant 1, mRNA [NM_015700] | 27247 |
| A_23_P53668  | -8.9 | -2.4 | 1.0  | 1.1 | NFYB | Homo sapiens nuclear transcription factor Y, beta (NFYB), mRNA [NM_006166]                                                                                         | 4801  |
| A_24_P49731  | 1.1  | 1.1  | -2.1 | 1.1 | NFYB | Homo sapiens nuclear transcription factor Y, beta (NFYB), mRNA [NM_006166]                                                                                         | 4801  |

|              |      |      |      |      |      |                                                                                                   |       |
|--------------|------|------|------|------|------|---------------------------------------------------------------------------------------------------|-------|
| A_23_P22994  | -1.4 | -2.8 | 1.3  | -1.1 | NFYC | Homo sapiens nuclear transcription factor Y, gamma (NFYC), transcript variant 2, mRNA [NM_014223] | 4802  |
| A_24_P165346 | 1.0  | -5.0 | 1.3  | -1.1 | NFYC | Homo sapiens nuclear transcription factor Y, gamma (NFYC), transcript variant 2, mRNA [NM_014223] | 4802  |
| A_23_P140375 | 2.1  | 2.1  | 1.8  | 1.7  | NGB  | Homo sapiens neuroglobin (NGB), mRNA [NM_021257]                                                  | 58157 |
| A_23_P115190 | 2.0  | -2.1 | -2.6 | -7.9 | NGF  | Homo sapiens nerve growth factor (beta polypeptide) (NGF), mRNA [NM_002506]                       | 4803  |



|              |      |      |      |      |        |                                                                                          |        |
|--------------|------|------|------|------|--------|------------------------------------------------------------------------------------------|--------|
| A_23_P218841 | -1.0 | 2.4  | -1.0 | -1.0 | NGLY1  | Homo sapiens N-glycanase 1 (NGLY1), transcript variant 1, mRNA [NM_018297]               | 55768  |
| A_24_P336474 | -1.3 | -1.4 | -6.6 | -1.0 | NHLH1  | Homo sapiens nescient helix loop helix 1 (NHLH1), mRNA [NM_005598]                       | 4807   |
| A_23_P412491 | 2.1  | -1.2 | -2.5 | 1.4  | NHLH2  | Homo sapiens nescient helix loop helix 2 (NHLH2), transcript variant 1, mRNA [NM_005599] | 4808   |
| A_24_P252780 | 3.1  | 1.9  | 3.7  | 1.2  | NHLRC2 | Homo sapiens NHL repeat containing 2 (NHLRC2), mRNA [NM_198514]                          | 374354 |

|              |      |      |      |      |        |                                                                                               |        |
|--------------|------|------|------|------|--------|-----------------------------------------------------------------------------------------------|--------|
| A_32_P125496 | 58.7 | 58.0 | 55.1 | 56.1 | NHLRC2 | Homo sapiens NHL repeat containing 2 (NHLRC2), mRNA [NM_198514]                               | 374354 |
| A_23_P418934 | -1.2 | -1.0 | 11.0 | -1.1 | NHLRC3 | Homo sapiens NHL repeat containing 3 (NHLRC3), transcript variant 2, mRNA [NM_001017370]      | 387921 |
| A_23_P110005 | 1.8  | 1.8  | 2.1  | 2.1  | NICN1  | Homo sapiens nicolin 1 (NICN1), mRNA [NM_032316]                                              | 84276  |
| A_24_P412512 | -5.8 | -1.6 | -1.7 | -1.2 | NIN    | Homo sapiens ninein (GSK3B interacting protein) (NIN), transcript variant 6, mRNA [NM_016350] | 51199  |

|              |      |      |      |      |        |                                                                                                                |       |
|--------------|------|------|------|------|--------|----------------------------------------------------------------------------------------------------------------|-------|
| A_23_P54147  | -1.0 | 1.0  | -2.4 | -1.0 | NIN    | Homo sapiens ninein (GSK3B interacting protein) (NIN), transcript variant 6, mRNA [NM_016350]                  | 51199 |
| A_23_P169137 | 1.8  | 1.8  | 3.5  | 1.6  | NINJ1  | Homo sapiens ninjurin 1 (NINJ1), mRNA [NM_004148]                                                              | 4814  |
| A_24_P338971 | 2.0  | 5.9  | 1.6  | 5.3  | NIPA2  | Homo sapiens non imprinted in Prader-Willi/Angelman syndrome 2 (NIPA2), transcript variant 1, mRNA [NM_030922] | 81614 |
| A_24_P798709 | -2.2 | -3.8 | -2.9 | -2.1 | NIPAL2 | NIPA-like domain containing 2 [Source:HGNC Symbol;Acc:25854] [ENST00000341166]                                 | 79815 |

|              |      |      |      |      |        |                                                                                            |       |
|--------------|------|------|------|------|--------|--------------------------------------------------------------------------------------------|-------|
| A_23_P146111 | 1.9  | 2.7  | 1.7  | 2.6  | NIPAL2 | Homo sapiens NIPA-like domain containing 2 (NIPAL2), mRNA [NM_024759]                      | 79815 |
| A_23_P46604  | 1.9  | 1.6  | 2.4  | -2.7 | NIPAL3 | Homo sapiens NIPA-like domain containing 3 (NIPAL3), mRNA [NM_020448]                      | 57185 |
| A_24_P180383 | 2.1  | 1.4  | 1.8  | 1.5  | NIPBL  | Homo sapiens Nipped-B homolog (Drosophila) (NIPBL), transcript variant B, mRNA [NM_015384] | 25836 |
| A_24_P925709 | -1.0 | -1.0 | -2.4 | -1.1 | NISCH  | nischarin [Source:HGNC Symbol;Acc:18006] [ENST00000488380]                                 | 11188 |
| A_23_P376661 | -1.1 | -1.7 | -2.6 | -1.5 | NIT1   | Homo sapiens nitrilase 1 (NIT1), transcript variant 1, mRNA [NM_005600]                    | 4817  |

|              |      |      |      |      |        |                                                                                  |        |
|--------------|------|------|------|------|--------|----------------------------------------------------------------------------------|--------|
| A_23_P51376  | -1.8 | -1.2 | -1.7 | -2.4 | NKAIN1 | Homo sapiens Na+/K+ transporting ATPase interacting 1 (NKAIN1), mRNA [NM_024522] | 79570  |
| A_23_P62276  | 2.5  | -2.7 | 2.2  | 1.9  | NKAP   | Homo sapiens NFkB activating protein (NKAP), mRNA [NM_024528]                    | 79576  |
| A_23_P133854 | -6.3 | 1.0  | 1.0  | -1.0 | NKAPL  | Homo sapiens NFkB activating protein-like (NKAPL), mRNA [NM_001007531]           | 222698 |
| A_23_P41804  | 1.1  | -4.6 | -7.1 | 1.9  | NKD2   | Homo sapiens naked cuticle homolog 2 (Drosophila) (NKD2), mRNA [NM_033120]       | 85409  |

|              |      |      |      |      |         |                                                                                                         |       |
|--------------|------|------|------|------|---------|---------------------------------------------------------------------------------------------------------|-------|
| A_24_P129107 | -2.1 | 1.0  | -2.0 | 1.1  | NKD2    | Homo sapiens naked cuticle homolog 2 (Drosophila) (NKD2), mRNA [NM_033120]                              | 85409 |
| A_23_P338519 | -2.0 | 1.6  | -1.9 | -1.0 | NKIRAS1 | Homo sapiens NFKB inhibitor interacting Ras-like 1 (NKIRAS1), mRNA [NM_020345]                          | 28512 |
| A_24_P152335 | -1.0 | -3.2 | -1.1 | -1.1 | NKIRAS2 | Homo sapiens NFKB inhibitor interacting Ras-like 2 (NKIRAS2), transcript variant 1, mRNA [NM_001001349] | 28511 |

|              |      |      |      |      |        |                                                                                      |        |
|--------------|------|------|------|------|--------|--------------------------------------------------------------------------------------|--------|
| A_32_P319858 | 1.7  | 3.3  | 1.7  | 1.6  | NKPD1  | Homo sapiens NTPase, KAP family P-loop domain containing 1 (NKPD1), mRNA [NM_198478] | 284353 |
| A_24_P184692 | -1.3 | 1.1  | -1.4 | -5.2 | NKX2-1 | Homo sapiens NK2 homeobox 1 (NKX2-1), transcript variant 2, mRNA [NM_003317]         | 7080   |
| A_24_P38702  | -2.3 | -3.3 | -2.0 | -2.5 | NKX2-3 | Homo sapiens NK2 homeobox 3 (NKX2-3), mRNA [NM_145285]                               | 159296 |
| A_23_P52425  | -1.1 | 1.1  | 1.5  | 2.5  | NKX2-3 | Homo sapiens NK2 homeobox 3 (NKX2-3), mRNA [NM_145285]                               | 159296 |

|              |      |      |      |      |        |                                                                              |        |
|--------------|------|------|------|------|--------|------------------------------------------------------------------------------|--------|
| A_23_P396135 | 1.1  | 2.0  | 1.2  | 1.5  | NKX2-5 | Homo sapiens NK2 homeobox 5 (NKX2-5), transcript variant 1, mRNA [NM_004387] | 1482   |
| A_24_P253293 | 4.6  | -1.8 | -2.2 | -1.3 | NKX2-8 | Homo sapiens NK2 homeobox 8 (NKX2-8), mRNA [NM_014360]                       | 26257  |
| A_23_P157545 | -1.1 | -1.4 | -3.5 | -1.3 | NKX3-1 | Homo sapiens NK3 homeobox 1 (NKX3-1), mRNA [NM_006167]                       | 4824   |
| A_23_P86587  | 2.3  | 2.3  | -1.3 | 2.5  | NKX6-2 | Homo sapiens NK6 homeobox 2 (NKX6-2), mRNA [NM_177400]                       | 84504  |
| A_24_P170365 | -1.2 | -3.1 | -4.0 | -1.6 | NKX6-3 | NK6 homeobox 3 [Source:HGNC Symbol;Acc:26328] [ENST00000518699]              | 157848 |



|              |      |      |      |      |        |                                                                                                 |        |
|--------------|------|------|------|------|--------|-------------------------------------------------------------------------------------------------|--------|
| A_23_P402804 | -2.5 | -2.0 | -2.8 | -1.0 | NKX6-3 | Homo sapiens cDNA FLJ25169 fis, clone CBR08739. [AK057898]                                      | 157848 |
| A_23_P141315 | -1.0 | -5.8 | -6.7 | -1.6 | NLE1   | Homo sapiens notchless homolog 1 (Drosophila) (NLE1), transcript variant 2, mRNA [NM_001014445] | 54475  |
| A_23_P18123  | 2.1  | 2.1  | 2.1  | 1.9  | NLGN1  | Homo sapiens neuroligin 1 (NLGN1), mRNA [NM_014932]                                             | 22871  |
| A_23_P207125 | 1.0  | 2.5  | 1.5  | -2.7 | NLGN2  | Homo sapiens neuroligin 2 (NLGN2), mRNA [NM_020795]                                             | 57555  |
| A_23_P33903  | -1.3 | -1.3 | -4.1 | -1.4 | NLGN4Y | Homo sapiens neuroligin 4, Y-linked (NLGN4Y), transcript variant 1, mRNA [NM_014893]            | 22829  |

|              |      |      |      |      |       |                                                                                                                                            |        |
|--------------|------|------|------|------|-------|--------------------------------------------------------------------------------------------------------------------------------------------|--------|
| A_24_P221515 | -1.0 | 3.4  | 3.2  | 1.8  | NLN   | neurolysin<br>(metallope<br>ptidase<br>M3 family)<br>[Source:H<br>GNC<br>Symbol;Ac<br>c:16058]<br>[ENST0000<br>0506539]                    | 57486  |
| A_23_P329399 | 1.3  | 1.5  | -4.2 | 1.1  | NLRC3 | Homo<br>sapiens<br>NLR<br>family,<br>CARD<br>domain<br>containing<br>3 (NLRC3),<br>mRNA<br>[NM_1788<br>44]                                 | 197358 |
| A_23_P402892 | 2.5  | 2.4  | 2.2  | 2.2  | NLRC5 | Homo<br>sapiens<br>NLR<br>family,<br>CARD<br>domain<br>containing<br>5 (NLRC5),<br>mRNA<br>[NM_0322<br>06]                                 | 84166  |
| A_24_P83615  | -2.1 | -1.6 | -1.6 | -3.6 | NLRP1 | Homo<br>sapiens<br>NLR<br>family,<br>pyrin<br>domain<br>containing<br>1 (NLRP1),<br>transcript<br>variant 5,<br>mRNA<br>[NM_0010<br>33053] | 22861  |

|              |      |      |      |      |        |                                                                                   |        |
|--------------|------|------|------|------|--------|-----------------------------------------------------------------------------------|--------|
| A_23_P399834 | 4.0  | 1.7  | 4.0  | 3.9  | NLRP13 | Homo sapiens NLR family, pyrin domain containing 13 (NLRP13), mRNA [NM_176810]    | 126204 |
| A_23_P164966 | -3.7 | 2.1  | 1.9  | 2.0  | NLRP4  | Homo sapiens NLR family, pyrin domain containing 4 (NLRP4), mRNA [NM_134444]      | 147945 |
| A_23_P409502 | 1.1  | -3.7 | 1.1  | -1.4 | NLRP9  | Homo sapiens NLR family, pyrin domain containing 9 (NLRP9), mRNA [NM_176820]      | 338321 |
| A_24_P244356 | -1.0 | 2.4  | -1.0 | -1.0 | NLRX1  | Homo sapiens NLR family member X1 (NLRX1), transcript variant 2, mRNA [NM_170722] | 79671  |

|             |      |       |      |      |        |                                                                                                    |        |
|-------------|------|-------|------|------|--------|----------------------------------------------------------------------------------------------------|--------|
| A_23_P88522 | 1.3  | -20.9 | -1.0 | -1.0 | NMB    | Homo sapiens neuromed in B (NMB), transcript variant 1, mRNA [NM_021077]                           | 4828   |
| A_23_P70634 | -1.0 | -1.1  | -2.0 | -2.0 | NMBR   | Homo sapiens neuromed in B receptor (NMBR), mRNA [NM_002511]                                       | 4829   |
| A_32_P11451 | -5.9 | -1.3  | -1.4 | -1.8 | NMD3   | Homo sapiens NMD3 homolog (S. cerevisiae) (NMD3), mRNA [NM_015938]                                 | 51068  |
| A_32_P39324 | 2.4  | -2.8  | -1.3 | -1.1 | NME2P1 | AGENCOURT_13617208 NIH_MGC_148 Homo sapiens cDNA clone IMAGE:30333013 5', mRNA sequence [CB993898] | 283458 |

|              |      |      |      |       |      |                                                                                                                                 |        |
|--------------|------|------|------|-------|------|---------------------------------------------------------------------------------------------------------------------------------|--------|
| A_23_P152115 | 3.1  | 2.6  | 2.2  | 1.6   | NME3 | Homo sapiens non-metastatic cells 3, protein expressed in (NME3), mRNA [NM_002513]                                              | 4832   |
| A_24_P210829 | -1.1 | 2.4  | 1.0  | -1.0  | NME4 | Homo sapiens non-metastatic cells 4, protein expressed in (NME4), nuclear gene encoding mitochondrial protein, mRNA [NM_005009] | 4833   |
| A_23_P212672 | 1.5  | 1.9  | 1.7  | -61.6 | NME9 | Homo sapiens NME gene family member 9 (NME9), mRNA [NM_178130]                                                                  | 347736 |
| A_23_P304652 | -1.4 | -1.4 | -6.0 | -1.4  | NME9 | Homo sapiens NME gene family member 9 (NME9), mRNA [NM_178130]                                                                  | 347736 |

|              |      |      |       |      |        |                                                                                                           |       |
|--------------|------|------|-------|------|--------|-----------------------------------------------------------------------------------------------------------|-------|
| A_23_P201264 | -1.2 | -1.1 | -1.2  | -2.7 | NMNAT1 | Homo sapiens nicotinamide nucleotide adenyltransferase 1 (NMNAT1), mRNA [NM_022787]                       | 64802 |
| A_23_P354908 | 1.0  | 1.0  | -27.3 | 1.1  | NMNAT2 | Homo sapiens nicotinamide nucleotide adenyltransferase 2 (NMNAT2), transcript variant 1, mRNA [NM_015039] | 23057 |
| A_23_P107373 | 1.9  | -1.9 | 2.6   | 1.5  | NMT1   | Homo sapiens N-myristoyltransferase 1 (NMT1), mRNA [NM_021079]                                            | 4836  |
| A_23_P138686 | -1.7 | -3.0 | -1.7  | -1.5 | NMT2   | Homo sapiens N-myristoyltransferase 2 (NMT2), mRNA [NM_004808]                                            | 9397  |

|              |      |      |      |      |      |                                                                                            |       |
|--------------|------|------|------|------|------|--------------------------------------------------------------------------------------------|-------|
| A_24_P382533 | 2.0  | 1.8  | 1.4  | 2.1  | NNAT | Homo sapiens neuronatin (NNAT), transcript variant 1, mRNA [NM_005386]                     | 4826  |
| A_24_P174775 | 2.7  | 1.5  | 1.9  | 2.5  | NNT  | nicotinamide nucleotide transhydrogenase [Source:HGNC Symbol;Acc:7863] [ENST00000264663]   | 23530 |
| A_23_P7074   | -1.1 | -9.1 | 1.6  | 1.0  | NOA1 | Homo sapiens nitric oxide associated 1 (NOA1), mRNA [NM_032313]                            | 84273 |
| A_24_P516215 | -1.0 | -2.4 | -1.0 | -1.0 | NOB1 | Homo sapiens NIN1/RPN12 binding protein 1 homolog (S. cerevisiae) (NOB1), mRNA [NM_014062] | 28987 |

|              |      |      |      |      |       |                                                                                               |       |
|--------------|------|------|------|------|-------|-----------------------------------------------------------------------------------------------|-------|
| A_23_P158627 | 3.2  | 1.5  | 1.4  | -1.4 | NOC4L | Homo sapiens nucleolar complex associated 4 homolog (S. cerevisiae) (NOC4L), mRNA [NM_024078] | 79050 |
| A_23_P127322 | 1.5  | -2.6 | 1.8  | 2.1  | NODAL | Homo sapiens nodal homolog (mouse) (NODAL), mRNA [NM_018055]                                  | 4838  |
| A_23_P55073  | 1.8  | 1.7  | -2.1 | 1.5  | NOL11 | Homo sapiens nucleolar protein 11 (NOL11), mRNA [NM_015462]                                   | 25926 |
| A_23_P416766 | -9.0 | -5.5 | -2.6 | -1.2 | NOL4  | Homo sapiens nucleolar protein 4 (NOL4), transcript variant 1, mRNA [NM_003787]               | 8715  |



|              |      |      |      |      |       |                                                                                                       |       |
|--------------|------|------|------|------|-------|-------------------------------------------------------------------------------------------------------|-------|
| A_24_P174903 | -2.7 | -1.6 | -1.6 | -2.1 | NOL7  | Homo sapiens cDNA FLI90820 fis, clone Y79AA100 1272. [AK075301]                                       | 51406 |
| A_24_P360601 | 3.6  | 1.6  | 3.2  | 3.3  | NOL8  | Homo sapiens nucleolar protein 8 (NOL8), transcript variant 1, mRNA [NM_017948]                       | 55035 |
| A_23_P144726 | 2.6  | 7.5  | 7.0  | 7.5  | NOP16 | NOP16 nucleolar protein homolog (yeast) [Source:HGNC Symbol;Acc:26934] [ENST00000451293]              | 51491 |
| A_23_P204364 | 2.5  | 1.8  | -2.4 | 2.3  | NOP2  | Homo sapiens NOP2 nucleolar protein homolog (yeast) (NOP2), transcript variant 2, mRNA [NM_001033714] | 4839  |

|              |      |      |      |      |       |                                                                                                       |       |
|--------------|------|------|------|------|-------|-------------------------------------------------------------------------------------------------------|-------|
| A_24_P101402 | -1.3 | 1.0  | -2.1 | -6.4 | NOP56 | Homo sapiens NOP56 ribonucleo protein homolog (yeast) (NOP56), transcript variant 1, mRNA [NM_006392] | 10528 |
| A_23_P154447 | 2.6  | 2.0  | 1.1  | 1.0  | NOP58 | Homo sapiens NOP58 ribonucleo protein homolog (yeast) (NOP58), mRNA [NM_015934]                       | 51602 |
| A_24_P934355 | -1.1 | -1.6 | 1.0  | -2.4 | NOS1  | Homo sapiens nitric oxide synthase 1 (neuronal) (NOS1), transcript variant 1, mRNA [NM_000620]        | 4842  |

|              |      |      |      |       |          |                                                                                                   |        |
|--------------|------|------|------|-------|----------|---------------------------------------------------------------------------------------------------|--------|
| A_32_P332320 | -1.3 | 1.8  | -1.5 | 2.4   | NOS1     | Homo sapiens nitric oxide synthase 1 (neuronal) (NOS1), transcript variant 2, mRNA [NM_001204218] | 4842   |
| A_24_P194017 | 1.4  | -1.7 | 1.2  | -12.9 | NOSIP    | Homo sapiens nitric oxide synthase interacting protein (NOSIP), mRNA [NM_015953]                  | 51070  |
| A_32_P5040   | -3.3 | 2.8  | 2.6  | 2.7   | NOTCH2NL | Homo sapiens notch 2 N-terminal like (NOTCH2NL), mRNA [NM_203458]                                 | 388677 |
| A_24_P399606 | -1.8 | -2.0 | -2.0 | -3.2  | NOTCH3   | Homo sapiens notch 3 (NOTCH3), mRNA [NM_000435]                                                   | 4854   |
| A_23_P365614 | -1.0 | -7.9 | -1.2 | -1.1  | NOTCH4   | Homo sapiens notch 4 (NOTCH4), mRNA [NM_004557]                                                   | 4855   |

|              |       |      |      |      |       |                                                                                                  |       |
|--------------|-------|------|------|------|-------|--------------------------------------------------------------------------------------------------|-------|
| A_23_P82929  | -4.2  | -2.6 | -1.3 | -1.5 | NOV   | Homo sapiens nephroblastoma overexpressed gene (NOV), mRNA [NM_002514]                           | 4856  |
| A_24_P29885  | 2.0   | 2.2  | -4.1 | -1.9 | NOV   | Homo sapiens nephroblastoma overexpressed gene (NOV), mRNA [NM_002514]                           | 4856  |
| A_23_P205435 | 2.5   | 2.4  | 1.0  | 3.4  | NOVA1 | Homo sapiens neuro-oncological ventral antigen 1 (NOVA1), transcript variant 1, mRNA [NM_002515] | 4857  |
| A_23_P217280 | -10.2 | -1.0 | 1.3  | -1.5 | NOX1  | Homo sapiens NADPH oxidase 1 (NOX1), transcript variant NOH-1L, mRNA [NM_007052]                 | 27035 |

|              |      |     |      |      |       |                                                                                                             |       |
|--------------|------|-----|------|------|-------|-------------------------------------------------------------------------------------------------------------|-------|
| A_23_P316410 | -2.3 | 1.0 | 1.0  | 1.1  | NOX1  | Homo sapiens NADPH oxidase 1 (NOX1), transcript variant NOH-1L, mRNA [NM_007052]                            | 27035 |
| A_23_P47148  | 7.2  | 7.2 | 7.2  | 7.1  | NOX4  | Homo sapiens NADPH oxidase 4 (NOX4), transcript variant 1, mRNA [NM_016931]                                 | 50507 |
| A_23_P140475 | 5.5  | 5.5 | 3.2  | 5.5  | NOX5  | Homo sapiens NADPH oxidase, EF-hand calcium binding domain 5 (NOX5), transcript variant 1, mRNA [NM_024505] | 79400 |
| A_23_P254353 | 2.8  | 1.1 | -1.1 | -1.5 | NOXA1 | Homo sapiens NADPH oxidase activator 1 (NOXA1), mRNA [NM_006647]                                            | 10811 |

|              |      |      |      |      |         |                                                                                              |        |
|--------------|------|------|------|------|---------|----------------------------------------------------------------------------------------------|--------|
| A_23_P382682 | -3.2 | -1.6 | 1.6  | 1.8  | NOXRED1 | Homo sapiens NADP-dependent oxidoreductase domain containing 1 (NOXRED1), mRNA [NM_00113475] | 122945 |
| A_23_P21570  | 3.7  | 1.4  | -1.8 | 1.4  | NPAS3   | Homo sapiens neuronal PAS domain protein 3 (NPAS3), transcript variant 3, mRNA [NM_173159]   | 64067  |
| A_32_P478023 | -1.4 | -4.5 | -1.4 | -1.5 | NPAS4   | Homo sapiens neuronal PAS domain protein 4 (NPAS4), mRNA [NM_178864]                         | 266743 |
| A_23_P300740 | -5.7 | 1.2  | -2.8 | -1.6 | NPB     | Homo sapiens neuropeptide B (NPB), mRNA [NM_148896]                                          | 256933 |

|              |       |      |      |      |        |                                                                                                                 |       |
|--------------|-------|------|------|------|--------|-----------------------------------------------------------------------------------------------------------------|-------|
| A_23_P20458  | -10.9 | -1.7 | -1.7 | -1.5 | NPBWR1 | Homo sapiens neuropeptides B/W receptor 1 (NPBWR1), mRNA [NM_005285]                                            | 2831  |
| A_23_P40334  | 1.9   | 2.1  | -1.5 | -1.1 | NPBWR2 | Homo sapiens neuropeptides B/W receptor 2 (NPBWR2), mRNA [NM_005286]                                            | 2832  |
| A_23_P107587 | 1.2   | 1.0  | 1.3  | -5.4 | NPC1   | Homo sapiens Niemann-Pick disease, type C1 (NPC1), mRNA [NM_000271]                                             | 4864  |
| A_23_P20075  | -1.7  | 1.2  | -4.4 | 1.2  | NPC1L1 | Homo sapiens NPC1 (Niemann-Pick disease, type C1, gene)-like 1 (NPC1L1), transcript variant 1, mRNA [NM_013389] | 29881 |

|              |      |      |      |     |        |                                                                                                                 |       |
|--------------|------|------|------|-----|--------|-----------------------------------------------------------------------------------------------------------------|-------|
| A_24_P324712 | 13.2 | 13.0 | 5.8  | 2.0 | NPC1L1 | Homo sapiens NPC1 (Niemann-Pick disease, type C1, gene)-like 1 (NPC1L1), transcript variant 1, mRNA [NM_013389] | 29881 |
| A_23_P146572 | 1.2  | 2.4  | 1.3  | 1.4 | NPDC1  | Homo sapiens neural proliferation, differentiation and control, 1 (NPDC1), mRNA [NM_015392]                     | 56654 |
| A_23_P164331 | -2.4 | -1.3 | 1.4  | 1.3 | NPEPPS | Homo sapiens aminopeptidase puromycin sensitive (NPEPPS), mRNA [NM_006310]                                      | 9520  |
| A_23_P1452   | 5.0  | 1.9  | -1.0 | 1.3 | NPFFR1 | Homo sapiens neuropeptide FF receptor 1 (NPFFR1), mRNA [NM_022146]                                              | 64106 |



|              |     |      |      |      |        |                                                                                            |       |
|--------------|-----|------|------|------|--------|--------------------------------------------------------------------------------------------|-------|
| A_24_P71890  | 1.0 | 1.3  | -2.0 | 1.1  | NPFFR2 | Homo sapiens neuropeptide FF receptor 2 (NPFFR2), transcript variant 2, mRNA [NM_053036]   | 10886 |
| A_24_P88801  | 2.2 | 2.0  | 1.2  | 1.2  | NPHP1  | Homo sapiens nephronophthisis 1 (juvenile) (NPHP1), transcript variant 1, mRNA [NM_000272] | 4867  |
| A_23_P393656 | 2.2 | 2.1  | -2.0 | 1.6  | NPHP3  | Homo sapiens cDNA FLJ31331 fis, clone MAMGL100056. [AK055893]                              | 27031 |
| A_23_P328652 | 1.4 | -5.3 | -1.2 | -2.6 | NPHP3  | Homo sapiens nephronophthisis 3 (adolescent) (NPHP3), mRNA [NM_153240]                     | 27031 |

|              |      |      |      |      |       |                                                                                        |        |
|--------------|------|------|------|------|-------|----------------------------------------------------------------------------------------|--------|
| A_23_P351734 | 1.2  | 1.1  | -2.3 | -1.4 | NPHP4 | Homo sapiens nephronophthisis 4 (NPHP4), mRNA [NM_015102]                              | 261734 |
| A_23_P5200   | -1.6 | 1.0  | -2.1 | -1.0 | NPHS1 | Homo sapiens nephrosis 1, congenital, Finnish type (nephrin) (NPHS1), mRNA [NM_004646] | 4868   |
| A_24_P110564 | 1.2  | -1.1 | -2.7 | 3.4  | NPIP  | Homo sapiens nuclear pore complex interacting protein (NPIP), mRNA [NM_006985]         | 9284   |
| A_32_P140823 | 1.5  | 5.9  | -1.1 | 1.8  | NPIP  | Homo sapiens nuclear pore complex interacting protein (NPIP), mRNA [NM_006985]         | 9284   |

|              |     |      |     |      |        |                                                                                                                          |        |
|--------------|-----|------|-----|------|--------|--------------------------------------------------------------------------------------------------------------------------|--------|
| A_32_P14843  | 2.4 | 10.5 | 2.0 | -1.0 | NPIPL2 | nuclear pore complex interacting protein-like 2<br>[Source:HGNC Symbol;Acc:34409]<br>[ENST00000429990]                   | 440348 |
| A_24_P826646 | 3.4 | 3.4  | 4.2 | 3.6  | NPM1   | Homo sapiens nucleophosmin (nucleolar phosphoprotein B23, numatrin) (NPM1), transcript variant 3, mRNA<br>[NM_001037738] | 4869   |
| A_23_P169007 | 2.5 | 5.8  | 4.6 | 1.8  | NPM2   | Homo sapiens nucleophosmin/nucl eoplasmin 2 (NPM2), mRNA<br>[NM_182795]                                                  | 10361  |
| A_23_P62752  | 1.3 | -2.2 | 1.0 | 1.3  | NPPB   | Homo sapiens natriuretic peptide B (NPPB), mRNA<br>[NM_002521]                                                           | 4879   |

|              |      |      |      |      |      |                                                                                                                                                |      |
|--------------|------|------|------|------|------|------------------------------------------------------------------------------------------------------------------------------------------------|------|
| A_23_P301942 | -1.1 | -1.1 | -2.5 | -1.6 | NPPC | Homo sapiens natriuretic peptide C (NPPC), mRNA [NM_024409]                                                                                    | 4880 |
| A_23_P123622 | 1.0  | 2.7  | 2.3  | 1.7  | NPR2 | Homo sapiens natriuretic peptide receptor B/guanylate cyclase B (atriuretic peptide receptor B) (NPR2), mRNA [NM_003995]                       | 4882 |
| A_23_P327451 | -1.1 | -3.3 | -1.2 | -1.3 | NPR3 | Homo sapiens natriuretic peptide receptor C/guanylate cyclase C (atriuretic peptide receptor C) (NPR3), transcript variant 2, mRNA [NM_000908] | 4883 |

|              |      |      |      |      |       |                                                                                                                    |        |
|--------------|------|------|------|------|-------|--------------------------------------------------------------------------------------------------------------------|--------|
| A_23_P18267  | -1.5 | 3.9  | 3.4  | 2.0  | NPRL2 | Homo sapiens nitrogen permease regulator-like 2 (S. cerevisiae) (NPRL2), mRNA [NM_006545]                          | 10641  |
| A_24_P304969 | -2.9 | -2.5 | -2.4 | -2.2 | NPRL3 | Homo sapiens nitrogen permease regulator-like 3 (S. cerevisiae) (NPRL3), transcript variant 2, mRNA [NM_001039476] | 8131   |
| A_23_P385192 | 1.1  | 1.1  | -4.4 | -1.0 | NPSA  | Homo sapiens prostate-specific antigen mRNA, complete cds. [AF527974]                                              | 266811 |
| A_23_P19886  | 1.2  | -1.0 | -2.8 | -1.3 | NPSR1 | Homo sapiens neuropeptide S receptor 1 (NPSR1), transcript variant 2, mRNA [NM_207173]                             | 387129 |

|              |       |     |      |      |       |                                                                                              |      |
|--------------|-------|-----|------|------|-------|----------------------------------------------------------------------------------------------|------|
| A_23_P256470 | -1.2  | 1.7 | 2.8  | 1.5  | NPY   | Homo sapiens neuropeptide Y (NPY), mRNA [NM_000905]                                          | 4852 |
| A_23_P69699  | -30.4 | 1.1 | -1.0 | -1.1 | NPY1R | Homo sapiens neuropeptide Y receptor Y1 (NPY1R), mRNA [NM_000909]                            | 4886 |
| A_23_P251836 | 1.5   | 1.6 | 1.8  | 2.3  | NPY5R | Homo sapiens neuropeptide Y receptor Y5 (NPY5R), mRNA [NM_006174]                            | 4889 |
| A_23_P206661 | -1.2  | 1.2 | -3.1 | -3.7 | NQO1  | Homo sapiens NAD(P)H dehydrogenase, quinone 1 (NQO1), transcript variant 1, mRNA [NM_000903] | 1728 |

|              |      |      |      |      |       |                                                                                        |      |
|--------------|------|------|------|------|-------|----------------------------------------------------------------------------------------|------|
| A_23_P160800 | 1.6  | -1.6 | 2.3  | 1.1  | NROB2 | Homo sapiens nuclear receptor subfamily 0, group B, member 2 (NROB2), mRNA [NM_021969] | 8431 |
| A_24_P250227 | 1.1  | 1.2  | -2.1 | -3.8 | NR1D1 | Homo sapiens nuclear receptor subfamily 1, group D, member 1 (NR1D1), mRNA [NM_021724] | 9572 |
| A_23_P67332  | -1.2 | -1.2 | -4.4 | -1.9 | NR1H2 | Homo sapiens nuclear receptor subfamily 1, group H, member 2 (NR1H2), mRNA [NM_007121] | 7376 |

|              |      |     |     |     |       |                                                                                                                 |       |
|--------------|------|-----|-----|-----|-------|-----------------------------------------------------------------------------------------------------------------|-------|
| A_23_P47135  | 2.3  | 1.5 | 1.1 | 1.7 | NR1H3 | Homo sapiens nuclear receptor subfamily 1, group H, member 3 (NR1H3), transcript variant 1, mRNA [NM_005693]    | 10062 |
| A_23_P25396  | 3.7  | 7.0 | 3.5 | 3.4 | NR1H4 | Homo sapiens nuclear receptor subfamily 1, group H, member 4 (NR1H4), transcript variant 2, mRNA [NM_005123]    | 9971  |
| A_23_P319572 | -1.1 | 2.2 | 2.1 | 1.0 | NR1I3 | Homo sapiens nuclear receptor subfamily 1, group I, member 3 (NR1I3), transcript variant 1, mRNA [NM_001077482] | 9970  |



|              |     |      |      |      |         |                                                                                        |        |
|--------------|-----|------|------|------|---------|----------------------------------------------------------------------------------------|--------|
| A_23_P40936  | 1.0 | -1.0 | -6.1 | -1.1 | NR2C2   | Homo sapiens nuclear receptor subfamily 2, group C, member 2 (NR2C2), mRNA [NM_003298] | 7182   |
| A_24_P126181 | 2.6 | 3.7  | 2.3  | 1.0  | NR2C2AP | Homo sapiens nuclear receptor 2C2-associated protein (NR2C2AP), mRNA [NM_176880]       | 126382 |
| A_32_P144710 | 1.8 | 1.7  | 2.6  | 1.7  | NR2C2AP | Homo sapiens nuclear receptor 2C2-associated protein (NR2C2AP), mRNA [NM_176880]       | 126382 |
| A_23_P338372 | 1.2 | -3.2 | 1.2  | -1.9 | NR2E1   | Homo sapiens nuclear receptor subfamily 2, group E, member 1 (NR2E1), mRNA [NM_003269] | 7101   |

|              |      |     |      |      |       |                                                                                                              |       |
|--------------|------|-----|------|------|-------|--------------------------------------------------------------------------------------------------------------|-------|
| A_23_P205867 | -2.0 | 1.0 | -1.3 | -1.2 | NR2E3 | Homo sapiens nuclear receptor subfamily 2, group E, member 3 (NR2E3), transcript variant 2, mRNA [NM_014249] | 10002 |
| A_23_P348737 | -5.8 | 1.1 | 1.0  | 1.1  | NR2F1 | Homo sapiens nuclear receptor subfamily 2, group F, member 1 (NR2F1), mRNA [NM_005654]                       | 7025  |
| A_23_P108326 | 1.2  | 2.1 | 2.0  | 2.6  | NR2F6 | Homo sapiens nuclear receptor subfamily 2, group F, member 6 (NR2F6), mRNA [NM_005234]                       | 2063  |

|              |      |      |      |      |       |                                                                                                                                           |      |
|--------------|------|------|------|------|-------|-------------------------------------------------------------------------------------------------------------------------------------------|------|
| A_24_P787914 | 1.1  | -2.5 | 1.1  | 1.1  | NR3C1 | Homo sapiens nuclear receptor subfamily 3, group C, member 1 (glucocorticoid receptor) (NR3C1), transcript variant 8, mRNA [NM_001204265] | 2908 |
| A_23_P131208 | -1.4 | -1.5 | -1.6 | -2.2 | NR4A2 | Homo sapiens nuclear receptor subfamily 4, group A, member 2 (NR4A2), mRNA [NM_006186]                                                    | 4929 |
| A_23_P216915 | 1.5  | 2.6  | 1.4  | -1.0 | NR5A1 | Homo sapiens nuclear receptor subfamily 5, group A, member 1 (NR5A1), mRNA [NM_004959]                                                    | 2516 |

|              |      |      |      |      |       |                                                                                                              |      |
|--------------|------|------|------|------|-------|--------------------------------------------------------------------------------------------------------------|------|
| A_23_P161004 | -1.9 | -2.1 | -1.1 | -2.3 | NR5A2 | Homo sapiens nuclear receptor subfamily 5, group A, member 2 (NR5A2), transcript variant 1, mRNA [NM_205860] | 2494 |
| A_23_P216900 | 1.6  | 1.1  | 2.5  | 1.0  | NR6A1 | nuclear receptor subfamily 6, group A, member 1 [Source:HGNC Symbol;Acc:7985] [ENST00000487099]              | 2649 |
| A_24_P230703 | -2.1 | 1.0  | 1.0  | 1.1  | NRAP  | Homo sapiens nebulin-related anchoring protein (NRAP), transcript variant 2, mRNA [NM_198060]                | 4892 |

|              |      |      |      |     |       |                                                                                                        |        |
|--------------|------|------|------|-----|-------|--------------------------------------------------------------------------------------------------------|--------|
| A_23_P63190  | 1.5  | 1.5  | -5.1 | 1.0 | NRAS  | Homo sapiens neuroblastoma RAS viral (v-ras) oncogene homolog (NRAS), mRNA [NM_002524]                 | 4893   |
| A_24_P242132 | -3.5 | -1.5 | -1.1 | 1.0 | NRBP2 | Homo sapiens nuclear receptor binding protein 2 (NRBP2), mRNA [NM_178564]                              | 340371 |
| A_23_P23006  | 4.9  | 11.0 | 8.2  | 5.2 | NRD1  | Homo sapiens nardilysin (N-arginine dibasic convertase) (NRD1), transcript variant 1, mRNA [NM_002525] | 4898   |
| A_23_P136493 | 1.8  | 1.8  | 2.9  | 1.0 | NRG1  | Homo sapiens neuregulin 1 (NRG1), transcript variant GGF2, mRNA [NM_013962]                            | 3084   |

|              |     |      |     |      |      |                                                                                                           |       |
|--------------|-----|------|-----|------|------|-----------------------------------------------------------------------------------------------------------|-------|
| A_23_P360777 | 1.6 | -1.0 | 2.6 | -2.5 | NRG1 | Homo sapiens neuregulin 1 (NRG1), transcript variant ndf43, mRNA [NM_013960]                              | 3084  |
| A_32_P163894 | 2.3 | 2.0  | 3.4 | 1.6  | NRG2 | Homo sapiens neuregulin 2 (NRG2), transcript variant 3, mRNA [NM_013982]                                  | 9542  |
| A_23_P61761  | 2.0 | -4.0 | 1.1 | 1.0  | NRG3 | Homo sapiens neuregulin 3 (NRG3), transcript variant 1, mRNA [NM_001010848]                               | 10718 |
| A_23_P116264 | 1.5 | 2.7  | 2.5 | 1.2  | NRGN | Homo sapiens neurogranin (protein kinase C substrate, RC3) (NRGN), transcript variant 1, mRNA [NM_006176] | 4900  |

|              |     |     |      |      |       |                                                                                |       |
|--------------|-----|-----|------|------|-------|--------------------------------------------------------------------------------|-------|
| A_23_P13929  | 1.4 | 1.4 | 1.3  | 2.9  | NRIP2 | Homo sapiens nuclear receptor interacting protein 2 (NRIP2), mRNA [NM_031474]  | 83714 |
| A_24_P403799 | 1.8 | 2.4 | 2.6  | 1.9  | NRIP2 | Homo sapiens nuclear receptor interacting protein 2 (NRIP2), mRNA [NM_031474]  | 83714 |
| A_23_P47682  | 1.1 | 4.3 | -2.6 | -1.9 | NRIP3 | Homo sapiens nuclear receptor interacting protein 3 (NRIP3), mRNA [NM_020645]  | 56675 |
| A_23_P8055   | 3.4 | 1.9 | 3.5  | -1.2 | NRM   | Homo sapiens nurim (nuclear envelope membrane protein) (NRM), mRNA [NM_007243] | 11270 |
| A_23_P82088  | 2.6 | 1.5 | 2.6  | 2.1  | NRN1  | Homo sapiens neuritin 1 (NRN1), mRNA [NM_016588]                               | 51299 |

|              |      |      |      |      |       |                                                                          |        |
|--------------|------|------|------|------|-------|--------------------------------------------------------------------------|--------|
| A_23_P414519 | 4.4  | -1.1 | 3.3  | 1.7  | NRN1  | Homo sapiens neuritin 1 (NRN1), mRNA [NM_016588]                         | 51299  |
| A_24_P59327  | 1.8  | 1.8  | 1.7  | 2.9  | NRP1  | neuropilin 1 [Source:HGNC Symbol;Acc:8004] [ENST00000374823]             | 8829   |
| A_23_P393727 | 1.9  | 3.3  | -3.8 | -1.2 | NRP2  | Homo sapiens neuropilin 2 (NRP2), transcript variant 1, mRNA [NM_201266] | 8828   |
| A_23_P429555 | 13.0 | -1.3 | 4.1  | 4.0  | NRP2  | Homo sapiens neuropilin 2 (NRP2), transcript variant 4, mRNA [NM_018534] | 8828   |
| A_23_P255616 | 2.6  | 2.6  | 2.6  | 2.7  | NRSN1 | Homo sapiens neurensin 1 (NRSN1), mRNA [NM_080723]                       | 140767 |



|              |     |     |      |      |       |                                                                               |       |
|--------------|-----|-----|------|------|-------|-------------------------------------------------------------------------------|-------|
| A_24_P416837 | 6.0 | 6.4 | 4.0  | 2.0  | NRSN2 | Homo sapiens neurensin 2 (NRSN2), mRNA [NM_024958]                            | 80023 |
| A_23_P90359  | 3.0 | 5.1 | 3.2  | 2.4  | NRTN  | Homo sapiens neurturin (NRTN), mRNA [NM_004558]                               | 4902  |
| A_23_P95453  | 1.7 | 1.7 | -2.5 | 1.7  | NRXN1 | Homo sapiens neurexin 1 (NRXN1), transcript variant alpha1, mRNA [NM_004801]  | 9378  |
| A_24_P261470 | 1.4 | 1.4 | 1.4  | -2.6 | NRXN2 | Homo sapiens neurexin 2 (NRXN2), transcript variant alpha-2, mRNA [NM_138732] | 9379  |

|              |       |      |      |      |      |                                                                                              |       |
|--------------|-------|------|------|------|------|----------------------------------------------------------------------------------------------|-------|
| A_24_P238333 | 1.0   | -1.0 | -2.1 | -1.1 | NSA2 | Homo sapiens NSA2 ribosome biogenesis homolog (S. cerevisiae) (NSA2), mRNA [NM_014886]       | 10412 |
| A_23_P167444 | -11.1 | 1.3  | 1.4  | 1.0  | NSA2 | Homo sapiens NSA2 ribosome biogenesis homolog (S. cerevisiae) (NSA2), mRNA [NM_014886]       | 10412 |
| A_23_P15714  | 1.0   | -1.0 | -2.5 | -1.0 | NSF  | Homo sapiens N-ethylmaleimide-sensitive factor (NSF), transcript variant 1, mRNA [NM_006178] | 4905  |

|              |      |     |      |      |        |                                                                                                                              |        |
|--------------|------|-----|------|------|--------|------------------------------------------------------------------------------------------------------------------------------|--------|
| A_23_P134809 | -2.2 | 1.1 | 1.1  | 1.1  | NSMAF  | Homo sapiens neutral sphingomyelinase (N-SMase) activation associated factor (NSMAF), transcript variant 1, mRNA [NM_003580] | 8439   |
| A_23_P422794 | -4.0 | 2.1 | -1.1 | -1.7 | NSMCE2 | Homo sapiens non-SMC element 2, MMS21 homolog (S. cerevisiae) (NSMCE2), mRNA [NM_173685]                                     | 286053 |
| A_32_P213822 | -3.6 | 1.0 | 1.0  | 1.1  | NSUN3  | NOP2/Sun domain family, member 3 [Source:HGNC Symbol;Acc:26208] [ENST00000314622]                                            | 63899  |

|              |      |      |      |      |         |                                                                                                  |        |
|--------------|------|------|------|------|---------|--------------------------------------------------------------------------------------------------|--------|
| A_23_P21785  | 2.5  | 2.3  | -1.2 | 1.1  | NSUN3   | Homo sapiens NOP2/Sun domain family, member 3 (NSUN3), mRNA [NM_022072]                          | 63899  |
| A_24_P130792 | -1.9 | -1.0 | 1.4  | -3.0 | NSUN4   | Homo sapiens NOP2/Sun domain family, member 4 (NSUN4), mRNA [NM_199044]                          | 387338 |
| A_24_P272300 | 2.4  | 1.0  | 1.0  | 1.0  | NSUN4   | Homo sapiens NOP2/Sun domain family, member 4 (NSUN4), mRNA [NM_199044]                          | 387338 |
| A_23_P501183 | -1.0 | 3.6  | -1.1 | -2.0 | NSUN5P2 | Homo sapiens NOP2/Sun domain family, member 5 pseudogene 2 (NSUN5P2), non-coding RNA [NR_033323] | 260294 |

|              |      |      |       |      |        |                                                                                                   |        |
|--------------|------|------|-------|------|--------|---------------------------------------------------------------------------------------------------|--------|
| A_32_P421816 | -1.0 | -1.0 | -17.5 | -1.0 | NT5C1B | Homo sapiens 5'-nucleotidase, cytosolic IB (NT5C1B), transcript variant 1, mRNA [NM_001002006]    | 93034  |
| A_23_P49924  | 17.4 | -1.0 | 14.8  | 4.7  | NT5C3L | Homo sapiens 5'-nucleotidase, cytosolic III-like (NT5C3L), transcript variant 1, mRNA [NM_052935] | 115024 |
| A_23_P382043 | 1.0  | 13.9 | -1.1  | -1.1 | NT5DC1 | Homo sapiens 5'-nucleotidase domain containing 1 (NT5DC1), mRNA [NM_152729]                       | 221294 |
| A_23_P44836  | 1.5  | 1.4  | -2.1  | -1.4 | NT5DC2 | Homo sapiens 5'-nucleotidase domain containing 2 (NT5DC2), transcript variant 2, mRNA [NM_022908] | 64943  |

|              |     |      |      |      |        |                                                                                |       |
|--------------|-----|------|------|------|--------|--------------------------------------------------------------------------------|-------|
| A_32_P76720  | 1.1 | 1.0  | -1.0 | -7.8 | NT5DC3 | Homo sapiens 5'-nucleotidase domain containing 3 (NT5DC3), mRNA [NM_001031701] | 51559 |
| A_24_P530690 | 2.5 | 2.2  | 1.3  | 1.1  | NTF3   | neurotrophin 3 [Source:HGNC Symbol;Acc:8023] [ENST00000535299]                 | 4908  |
| A_23_P360797 | 1.6 | 2.9  | 1.5  | 1.0  | NTF3   | Homo sapiens neurotrophin 3 (NTF3), transcript variant 2, mRNA [NM_002527]     | 4908  |
| A_23_P15478  | 1.1 | -6.0 | -1.4 | -3.7 | NTN1   | Homo sapiens netrin 1 (NTN1), mRNA [NM_004822]                                 | 9423  |
| A_23_P100408 | 1.4 | 1.7  | 2.4  | 1.0  | NTN3   | Homo sapiens netrin 3 (NTN3), mRNA [NM_006181]                                 | 4917  |

|              |      |       |      |       |       |                                                                                                                |        |
|--------------|------|-------|------|-------|-------|----------------------------------------------------------------------------------------------------------------|--------|
| A_24_P85375  | -1.0 | -11.2 | -1.1 | -1.0  | NTN5  | Homo sapiens netrin 5, mRNA (cDNA clone MGC:12924 IMAGE:4137205), complete cds. [BC021210]                     | 126147 |
| A_24_P415195 | 1.1  | -3.0  | 1.3  | 1.1   | NTRK2 | Homo sapiens mRNA; cDNA DKFZp686D1394 (from clone DKFZp686D1394). [BX649001]                                   | 4915   |
| A_23_P205900 | 3.6  | 1.2   | 2.2  | 2.6   | NTRK3 | Homo sapiens neurotrophic tyrosine kinase, receptor, type 3 (NTRK3), transcript variant 1, mRNA [NM_001012338] | 4916   |
| A_23_P36882  | -1.3 | -1.3  | -1.4 | -20.3 | NTS   | Homo sapiens neurotensin (NTS), mRNA [NM_006183]                                                               | 4922   |

|              |      |      |      |     |       |                                                                                                             |       |
|--------------|------|------|------|-----|-------|-------------------------------------------------------------------------------------------------------------|-------|
| A_24_P378806 | 2.7  | 1.9  | -1.1 | 1.5 | NTSR1 | Homo sapiens neurotensin receptor 1 (high affinity) (NTSR1), mRNA [NM_002531]                               | 4923  |
| A_23_P315212 | 1.1  | -3.9 | -1.1 | 1.3 | NTSR2 | Homo sapiens neurotensin receptor 2 (NTSR2), mRNA [NM_012344]                                               | 23620 |
| A_23_P348257 | -1.1 | -1.5 | -2.2 | 1.1 | NUAK1 | Homo sapiens NUA family, SNF1-like kinase, 1 (NUAK1), mRNA [NM_014840]                                      | 9891  |
| A_23_P215154 | 1.1  | 3.8  | 3.8  | 1.6 | NUB1  | Homo sapiens negative regulator of ubiquitin-like proteins 1 (NUB1), transcript variant 2, mRNA [NM_016118] | 51667 |



|              |      |      |      |      |        |                                                                                                       |       |
|--------------|------|------|------|------|--------|-------------------------------------------------------------------------------------------------------|-------|
| A_23_P170908 | 1.0  | -6.4 | -1.0 | -1.1 | NUBPL  | Homo sapiens nucleotide binding protein-like (NUBPL), transcript variant 1, mRNA [NM_025152]          | 80224 |
| A_23_P78771  | -2.5 | -1.1 | -1.0 | -2.7 | NUCB1  | Homo sapiens nucleobindin 1 (NUCB1), mRNA [NM_006184]                                                 | 4924  |
| A_23_P149724 | -1.1 | -5.6 | -1.2 | -1.2 | NUCKS1 | Homo sapiens nuclear casein kinase and cyclin-dependent kinase substrate 1 (NUCKS1), mRNA [NM_022731] | 64710 |
| A_32_P41471  | -3.1 | 1.0  | 1.1  | 1.0  | NUDT13 | Homo sapiens nudix (nucleoside diphosphate linked moiety X)-type motif 13 (NUDT13), mRNA [NM_015901]  | 25961 |

|              |      |      |      |      |          |                                                                                                                                     |        |
|--------------|------|------|------|------|----------|-------------------------------------------------------------------------------------------------------------------------------------|--------|
| A_32_P5976   | 2.8  | 2.8  | -1.8 | 1.4  | NUDT14   | Homo sapiens nudix (nucleoside diphosphate linked moiety X)-type motif 14 (NUDT14), mRNA [NM_177533]                                | 256281 |
| A_24_P399065 | -1.3 | -1.3 | -1.1 | -2.2 | NUDT16L1 | Homo sapiens nudix (nucleoside diphosphate linked moiety X)-type motif 16-like 1 (NUDT16L1), transcript variant 1, mRNA [NM_032349] | 84309  |

|              |      |      |      |      |          |                                                                                                                                                     |        |
|--------------|------|------|------|------|----------|-----------------------------------------------------------------------------------------------------------------------------------------------------|--------|
| A_32_P5376   | 3.1  | 2.2  | 2.7  | 1.4  | NUDT16P1 | Homo sapiens nudix (nucleoside diphosphate linked moiety X)-type motif 16 pseudogene 1 (NUDT16P1), transcript variant 2, non-coding RNA [NR_002949] | 152195 |
| A_23_P112478 | -2.0 | -1.6 | -2.9 | -1.4 | NUDT2    | Homo sapiens nudix (nucleoside diphosphate linked moiety X)-type motif 2 (NUDT2), transcript variant 1, mRNA [NM_001161]                            | 318    |
| A_24_P15797  | 1.2  | 1.1  | 2.1  | -1.0 | NUDT22   | Homo sapiens cDNA FLJ34477 fis, clone HLUNG2003833. [AK091796]                                                                                      | 84304  |

|              |      |     |      |      |        |                                                                                                                            |       |
|--------------|------|-----|------|------|--------|----------------------------------------------------------------------------------------------------------------------------|-------|
| A_23_P75441  | 28.4 | 7.8 | 25.1 | 27.7 | NUDT22 | Homo sapiens nudix (nucleoside diphosphate linked moiety X)-type motif 22 (NUDT22), transcript variant 1, mRNA [NM_032344] | 84304 |
| A_32_P117723 | -1.5 | 1.1 | -1.7 | -3.4 | NUDT4  | Homo sapiens nudix (nucleoside diphosphate linked moiety X)-type motif 4 (NUDT4), transcript variant 2, mRNA [NM_199040]   | 11163 |

|             |      |     |     |     |         |                                                                                                                                |        |
|-------------|------|-----|-----|-----|---------|--------------------------------------------------------------------------------------------------------------------------------|--------|
| A_32_P40463 | -5.7 | 1.2 | 1.1 | 1.2 | NUDT9P1 | Homo sapiens nudix (nucleoside diphosphate linked moiety X)-type motif 9 pseudogene 1 (NUDT9P1), non-coding RNA [NR_002779]    | 119369 |
| A_23_P74349 | 2.2  | 1.5 | 2.0 | 1.6 | NUF2    | Homo sapiens NUF2, NDC80 kinetochore complex component, homolog (S. cerevisiae) (NUF2), transcript variant 1, mRNA [NM_145697] | 83540  |

|              |      |      |      |      |        |                                                                                                            |       |
|--------------|------|------|------|------|--------|------------------------------------------------------------------------------------------------------------|-------|
| A_23_P36939  | -2.7 | -1.0 | -1.7 | -1.0 | NUFIP1 | Homo sapiens nuclear fragile X mental retardation protein interacting protein 1 (NUFIP1), mRNA [NM_012345] | 26747 |
| A_24_P270376 | 2.2  | 1.4  | -1.2 | -1.0 | NUFIP1 | Homo sapiens nuclear fragile X mental retardation protein interacting protein 1 (NUFIP1), mRNA [NM_012345] | 26747 |
| A_24_P921144 | 2.2  | 2.1  | 2.0  | 2.2  | NUFIP2 | Homo sapiens nuclear fragile X mental retardation protein interacting protein 2 (NUFIP2), mRNA [NM_020772] | 57532 |

|              |      |      |      |      |          |                                                                                       |        |
|--------------|------|------|------|------|----------|---------------------------------------------------------------------------------------|--------|
| A_23_P162120 | -2.5 | -4.5 | -1.6 | 1.0  | NUMA1    | Homo sapiens nuclear mitotic apparatus protein 1 (NUMA1), mRNA [NM_006185]            | 4926   |
| A_23_P12503  | -1.0 | -2.6 | -1.0 | -1.0 | NUP133   | Homo sapiens nucleopori n 133kDa (NUP133), mRNA [NM_018230]                           | 55746  |
| A_24_P237753 | 3.6  | 2.4  | 1.4  | 5.6  | NUP188   | Homo sapiens nucleopori n 188kDa (NUP188), mRNA [NM_015354]                           | 23511  |
| A_32_P375062 | 1.6  | -2.0 | -1.2 | 1.2  | NUP210P1 | Homo sapiens nucleopori n 210kDa pseudoge ne 1 (NUP210P1), non-coding RNA [NR_034158] | 255330 |
| A_23_P211627 | -5.4 | -1.0 | 3.8  | -1.0 | NUP50    | Homo sapiens nucleopori n 50kDa (NUP50), transcript variant 2, mRNA [NM_007172]       | 10762  |

|              |      |      |      |      |       |                                                                                                             |        |
|--------------|------|------|------|------|-------|-------------------------------------------------------------------------------------------------------------|--------|
| A_23_P204891 | 1.1  | -2.6 | 1.1  | 1.1  | NUPL1 | Homo sapiens nucleoporin like 1 (NUPL1), transcript variant 1, mRNA [NM_014089]                             | 9818   |
| A_23_P123039 | 2.5  | 1.0  | 1.1  | -1.1 | NUPL2 | Homo sapiens nucleoporin like 2 (NUPL2), mRNA [NM_007342]                                                   | 11097  |
| A_32_P34116  | -1.0 | -1.0 | -1.0 | -2.4 | NUS1  | Homo sapiens nuclear undecaprenyl pyrophosphate synthase 1 homolog (S. cerevisiae) (NUS1), mRNA [NM_138459] | 116150 |
| A_23_P96990  | 1.5  | -2.6 | 1.0  | -1.0 | NVL   | Homo sapiens nuclear VCP-like (NVL), transcript variant 1, mRNA [NM_002533]                                 | 4931   |



|              |      |      |      |      |       |                                                                   |        |
|--------------|------|------|------|------|-------|-------------------------------------------------------------------|--------|
| A_23_P148568 | -7.4 | -1.1 | -1.2 | -1.1 | NXF2  | Homo sapiens nuclear RNA export factor 2 (NXF2), mRNA [NM_022053] | 56001  |
| A_23_P171336 | 2.1  | 1.7  | 1.6  | 1.8  | NXF3  | Homo sapiens nuclear RNA export factor 3 (NXF3), mRNA [NM_022052] | 56000  |
| A_23_P384650 | 2.7  | 2.2  | 2.4  | 1.1  | NXNL1 | Homo sapiens nucleored oxin-like 1 (NXNL1), mRNA [NM_138454]      | 115861 |
| A_23_P316121 | 3.9  | 1.1  | 1.1  | 1.0  | NXPH2 | Homo sapiens neurexophilin 2 (NXPH2), mRNA [NM_007226]            | 11249  |
| A_23_P310590 | -2.5 | -1.0 | -1.1 | -1.0 | OAF   | Homo sapiens OAF homolog (Drosophila) (OAF), mRNA [NM_178507]     | 220323 |

|              |      |      |      |     |      |                                                                                                         |      |
|--------------|------|------|------|-----|------|---------------------------------------------------------------------------------------------------------|------|
| A_23_P64828  | 1.0  | -1.0 | -4.6 | 1.0 | OAS1 | Homo sapiens 2'-5'-oligoadenylate synthetase 1, 40/46kDa (OAS1), transcript variant 2, mRNA [NM_002534] | 4938 |
| A_23_P204087 | -1.0 | 2.1  | -1.3 | 2.4 | OAS2 | Homo sapiens 2'-5'-oligoadenylate synthetase 2, 69/71kDa (OAS2), transcript variant 1, mRNA [NM_016817] | 4939 |
| A_24_P335305 | 2.4  | 3.3  | 2.4  | 2.4 | OAS3 | Homo sapiens 2'-5'-oligoadenylate synthetase 3, 100kDa (OAS3), mRNA [NM_006187]                         | 4940 |

|              |      |      |      |      |       |                                                                                                  |       |
|--------------|------|------|------|------|-------|--------------------------------------------------------------------------------------------------|-------|
| A_23_P47955  | 2.5  | 2.4  | 1.2  | 2.4  | OAS3  | Homo sapiens 2'-5'-oligoadenylate synthetase 3, 100kDa (OAS3), mRNA [NM_006187]                  | 4940  |
| A_23_P409945 | -4.2 | 1.1  | -1.0 | 1.1  | OAZ1  | Homo sapiens ornithine decarboxylase antizyme 1 (OAZ1), mRNA [NM_004152]                         | 4946  |
| A_23_P409951 | 1.7  | -1.1 | -9.7 | 1.1  | OAZ1  | Homo sapiens ornithine decarboxylase antizyme 1 (OAZ1), mRNA [NM_004152]                         | 4946  |
| A_23_P46852  | -1.7 | -1.7 | 1.4  | -2.4 | OBFC1 | Homo sapiens oligonucleotide/oligosaccharide-binding fold containing 1 (OBFC1), mRNA [NM_024928] | 79991 |

|              |      |      |      |      |        |                                                                                                                             |       |
|--------------|------|------|------|------|--------|-----------------------------------------------------------------------------------------------------------------------------|-------|
| A_24_P759674 | 1.8  | 1.1  | 2.3  | 2.3  | OBFC1  | Homo sapiens oligonucleotide/oligosaccharide-binding fold containing 1 (OBFC1), mRNA [NM_024928]                            | 79991 |
| A_24_P229531 | -1.8 | -2.2 | -2.1 | -2.1 | OBFC2A | Homo sapiens oligonucleotide/oligosaccharide-binding fold containing 2A (OBFC2A), transcript variant 1, mRNA [NM_001031716] | 64859 |
| A_23_P87482  | -1.0 | -2.7 | -2.2 | -1.2 | OBFC2B | Homo sapiens oligonucleotide/oligosaccharide-binding fold containing 2B (OBFC2B), mRNA [NM_024068]                          | 79035 |

|              |       |      |      |      |        |                                                                                                                             |       |
|--------------|-------|------|------|------|--------|-----------------------------------------------------------------------------------------------------------------------------|-------|
| A_24_P283928 | 2.9   | 4.4  | 4.1  | 2.7  | OBFC2B | Homo sapiens oligonucleotide/oligosaccharide-binding fold containing 2B (OBFC2B), mRNA [NM_024068]                          | 79035 |
| A_23_P63128  | 1.1   | -1.9 | -1.4 | -3.8 | OBSCN  | Homo sapiens cDNA FLJ14124 fis, clone MAMMA1002498. [AK024186]                                                              | 84033 |
| A_24_P119685 | 1.4   | 1.6  | 2.2  | 1.8  | OBSCN  | Homo sapiens obscurin, cytoskeletal calmodulin and titin-interacting RhoGEF (OBSCN), transcript variant 1, mRNA [NM_052843] | 84033 |
| A_23_P90523  | -42.9 | 1.1  | 1.4  | 1.4  | OCEL1  | Homo sapiens occludin/ELL domain containing 1 (OCEL1), mRNA [NM_024578]                                                     | 79629 |

|              |      |      |      |       |      |                                                                                                |           |
|--------------|------|------|------|-------|------|------------------------------------------------------------------------------------------------|-----------|
| A_24_P102053 | 1.1  | 1.0  | -5.0 | -1.0  | OCLN | Homo sapiens occludin (OCLN), transcript variant 1, mRNA [NM_002538]                           | 100506658 |
| A_24_P196307 | -1.4 | 1.3  | -2.2 | -15.9 | OCR1 | Homo sapiens ovarian cancer-related protein 1 (OCR1) mRNA, complete cds. [AF314543]            | 100128298 |
| A_23_P170246 | 1.0  | -1.0 | -1.1 | -6.8  | OCRL | Homo sapiens oculocerebrorenal syndrome of Lowe (OCRL), transcript variant a, mRNA [NM_000276] | 4952      |
| A_23_P58228  | -1.1 | -4.0 | 4.9  | 2.7   | ODAM | Homo sapiens odontogenic, ameloblast associated (ODAM), mRNA [NM_017855]                       | 54959     |

|              |      |     |      |     |        |                                                                                   |        |
|--------------|------|-----|------|-----|--------|-----------------------------------------------------------------------------------|--------|
| A_23_P165840 | 2.8  | 1.9 | 1.2  | 1.5 | ODC1   | Homo sapiens ornithine decarboxylase 1 (ODC1), mRNA [NM_002539]                   | 4953   |
| A_23_P31626  | -4.7 | 1.4 | 1.2  | 1.0 | ODF1   | Homo sapiens outer dense fiber of sperm tails 1 (ODF1), mRNA [NM_024410]          | 4956   |
| A_32_P337508 | 2.8  | 1.1 | 3.3  | 1.9 | ODF3L2 | Homo sapiens outer dense fiber of sperm tails 3-like 2 (ODF3L2), mRNA [NM_182577] | 284451 |
| A_23_P421526 | 1.0  | 1.0 | -2.1 | 1.0 | ODF4   | Homo sapiens outer dense fiber of sperm tails 4 (ODF4), mRNA [NM_153007]          | 146852 |

|              |      |      |      |      |      |                                                                                   |       |
|--------------|------|------|------|------|------|-----------------------------------------------------------------------------------|-------|
| A_24_P299474 | 1.1  | 2.8  | 1.3  | 1.1  | ODZ2 | Homo sapiens odz, odd Oz/ten-m homolog 2 (Drosophila) (ODZ2), mRNA [NM_001122679] | 57451 |
| A_24_P418357 | -1.0 | -6.6 | -1.1 | -1.1 | ODZ3 | Homo sapiens odz, odd Oz/ten-m homolog 3 (Drosophila) (ODZ3), mRNA [NM_001080477] | 55714 |
| A_24_P69053  | 1.2  | -1.0 | -6.3 | -1.0 | ODZ3 | Homo sapiens odz, odd Oz/ten-m homolog 3 (Drosophila) (ODZ3), mRNA [NM_001080477] | 55714 |
| A_23_P121722 | 2.6  | 1.8  | 3.0  | -1.4 | ODZ3 | Homo sapiens odz, odd Oz/ten-m homolog 3 (Drosophila) (ODZ3), mRNA [NM_001080477] | 55714 |



|              |      |      |      |     |       |                                                                                                                                                                       |        |
|--------------|------|------|------|-----|-------|-----------------------------------------------------------------------------------------------------------------------------------------------------------------------|--------|
| A_24_P926284 | 1.1  | -8.4 | 1.1  | 1.0 | OFCC1 | Homo sapiens clone 10AP3 MRDS1 protein (MRDS1) mRNA, partial cds. [AF520801]                                                                                          | 266553 |
| A_24_P9454   | -6.9 | -1.4 | -2.3 | 1.3 | OGDH  | Homo sapiens oxoglutarate (alpha-ketoglutarate) dehydrogenase (lipoamide) (OGDH), nuclear gene encoding mitochondrial protein, transcript variant 1, mRNA [NM_002541] | 4967   |

|              |      |     |      |      |        |                                                                                                                                                                       |       |
|--------------|------|-----|------|------|--------|-----------------------------------------------------------------------------------------------------------------------------------------------------------------------|-------|
| A_23_P123133 | 4.1  | 6.1 | 2.8  | 4.5  | OGDH   | Homo sapiens oxoglutarate (alpha-ketoglutarate) dehydrogenase (lipoamide) (OGDH), nuclear gene encoding mitochondrial protein, transcript variant 1, mRNA [NM_002541] | 4967  |
| A_23_P3775   | -2.6 | 1.1 | -1.0 | -1.0 | OGFOD1 | Homo sapiens 2-oxoglutarate and iron-dependent oxygenase domain containing 1 (OGFOD1), mRNA [NM_018233]                                                               | 55239 |

|              |      |     |      |       |      |                                                                                                                                                                                     |      |
|--------------|------|-----|------|-------|------|-------------------------------------------------------------------------------------------------------------------------------------------------------------------------------------|------|
| A_23_P344392 | 1.8  | 2.5 | -1.8 | -15.4 | OGG1 | Homo sapiens 8-oxoguanine DNA glycosylase (OGG1), nuclear gene encoding mitochondrial protein, transcript variant 1a, mRNA [NM_002542]                                              | 4968 |
| A_23_P82990  | 1.1  | 1.0 | -2.5 | 1.1   | OGN  | Homo sapiens osteoglycin (OGN), transcript variant 1, mRNA [NM_033014]                                                                                                              | 4969 |
| A_23_P381976 | -2.6 | 1.0 | -1.0 | 1.0   | OGT  | Homo sapiens O-linked N-acetylglucosamine (GlcNAc) transferase (UDP-N-acetylglucosamine:polypeptide-N-acetylglucosaminyl transferase) (OGT), transcript variant 1, mRNA [NM_181672] | 8473 |

|              |      |      |      |      |             |                                                                                     |           |
|--------------|------|------|------|------|-------------|-------------------------------------------------------------------------------------|-----------|
| A_32_P67544  | 1.1  | 1.1  | 1.0  | 2.8  | OIP5-AS1    | Homo sapiens mRNA; cDNA DKFZp686E0352 (from clone DKFZp686E0352). [BX647764]        | 729082    |
| A_24_P912126 | -1.0 | -1.0 | 2.4  | 1.2  | OK/SW-CL.58 | Homo sapiens mRNA for OK/SW-CL.58, complete cds. [AB064667]                         | 100131766 |
| A_24_P114438 | -1.0 | -1.6 | -1.0 | -3.0 | OLA1        | Homo sapiens Obg-like ATPase 1 (OLA1), transcript variant 1, mRNA [NM_013341]       | 29789     |
| A_23_P161458 | -1.0 | 2.1  | -1.0 | -1.5 | OLAH        | Homo sapiens oleoyl-ACP hydrolase (OLAH), transcript variant 2, mRNA [NM_001039702] | 55301     |

|              |      |       |      |       |       |                                                                              |        |
|--------------|------|-------|------|-------|-------|------------------------------------------------------------------------------|--------|
| A_24_P406601 | 1.1  | -34.8 | -1.0 | -1.0  | OLFM1 | Homo sapiens olfactome din 1 (OLFM1), transcript variant 1, mRNA [NM_014279] | 10439  |
| A_23_P219161 | 2.7  | -1.2  | -1.6 | -1.8  | OLFM1 | Homo sapiens olfactome din 1 (OLFM1), transcript variant 2, mRNA [NM_006334] | 10439  |
| A_23_P67151  | -1.1 | 2.0   | -1.3 | -2.2  | OLFM2 | Homo sapiens olfactome din 2 (OLFM2), mRNA [NM_058164]                       | 93145  |
| A_24_P402444 | -1.0 | -1.1  | -1.1 | -10.6 | OLFM3 | Homo sapiens olfactome din 3 (OLFM3), mRNA [NM_058170]                       | 118427 |
| A_24_P181254 | -4.7 | 1.0   | 1.0  | 1.1   | OLFM4 | Homo sapiens olfactome din 4 (OLFM4), mRNA [NM_006418]                       | 10562  |

|              |      |      |      |      |         |                                                                                                                       |        |
|--------------|------|------|------|------|---------|-----------------------------------------------------------------------------------------------------------------------|--------|
| A_24_P100856 | 3.2  | 3.2  | 2.6  | 1.4  | OLFML2A | Homo sapiens olfactomedin-like 2A (OLFML2A), mRNA [NM_182487]                                                         | 169611 |
| A_32_P24832  | -1.8 | -1.4 | -2.9 | -3.2 | OLFML3  | Homo sapiens olfactomedin-like 3 (OLFML3), mRNA [NM_020190]                                                           | 56944  |
| A_24_P124624 | 3.9  | 3.9  | 3.8  | 3.9  | OLR1    | Homo sapiens oxidized low density lipoprotein (lectin-like) receptor 1 (OLR1), transcript variant 1, mRNA [NM_002543] | 4973   |
| A_23_P138139 | -1.1 | -1.0 | -1.1 | 4.4  | OMA1    | Homo sapiens OMA1 homolog, zinc metalloproteinase (S. cerevisiae) (OMA1), mRNA [NM_145243]                            | 115209 |

|              |      |      |      |      |         |                                                                                 |        |
|--------------|------|------|------|------|---------|---------------------------------------------------------------------------------|--------|
| A_23_P116587 | 1.1  | 2.4  | -2.0 | 1.5  | OMP     | Homo sapiens olfactory marker protein (OMP), mRNA [NM_006189]                   | 4975   |
| A_23_P340717 | 20.3 | 2.5  | 24.2 | 19.9 | ONECUT1 | Homo sapiens one cut homeobox 1 (ONECUT1), mRNA [NM_004498]                     | 3175   |
| A_32_P124708 | 1.1  | 1.1  | -1.3 | 2.2  | ONECUT2 | Homo sapiens one cut homeobox 2 (ONECUT2), mRNA [NM_004852]                     | 9480   |
| A_32_P58606  | -2.2 | 1.1  | 1.1  | -1.7 | ONECUT2 | Homo sapiens one cut homeobox 2 (ONECUT2), mRNA [NM_004852]                     | 9480   |
| A_32_P14762  | 1.0  | -4.0 | 1.1  | -1.0 | OOEP    | Homo sapiens oocyte expressed protein homolog (dog) (OOEP), mRNA [NM_001080507] | 441161 |

|              |     |      |      |      |      |                                                                                                                                                                                    |       |
|--------------|-----|------|------|------|------|------------------------------------------------------------------------------------------------------------------------------------------------------------------------------------|-------|
| A_24_P710866 | 1.4 | -2.5 | 1.0  | -1.9 | OPA3 | UI-CF-FN0-afr-i-16-0-UI.s1 UI-CF-FN0 Homo sapiens cDNA clone UI-CF-FN0-afr-i-16-0-UI 3', mRNA sequence [CA944687]                                                                  | 80207 |
| A_24_P14257  | 1.3 | -1.4 | -3.8 | -1.2 | OPA3 | Homo sapiens optic atrophy 3 (autosomal recessive, with chorea and spastic paraplegia) (OPA3), nuclear gene encoding mitochondrial protein, transcript variant 2, mRNA [NM_025136] | 80207 |



|              |      |      |      |      |        |                                                                                                                           |       |
|--------------|------|------|------|------|--------|---------------------------------------------------------------------------------------------------------------------------|-------|
| A_24_P132813 | 2.0  | 1.0  | 1.0  | 1.0  | OPALIN | Homo sapiens oligodendrocytic myelin paranodal and inner loop protein (OPALIN), transcript variant 3, mRNA [NM_001040103] | 93377 |
| A_23_P72663  | 1.1  | -3.2 | -1.4 | -1.3 | OPCML  | Homo sapiens opioid binding protein/cell adhesion molecule-like (OPCML), transcript variant 2, mRNA [NM_001012393]        | 4978  |
| A_23_P417753 | -1.0 | -2.5 | -1.1 | -1.0 | OPHN1  | Homo sapiens oligophrenin 1 (OPHN1), mRNA [NM_002547]                                                                     | 4983  |
| A_23_P170186 | 1.5  | 1.5  | 2.5  | 2.5  | OPLAH  | Homo sapiens 5-oxoprolinase (ATP-hydrolyzing) (OPLAH), mRNA [NM_017570]                                                   | 26873 |

|              |      |      |      |      |        |                                                                                        |        |
|--------------|------|------|------|------|--------|----------------------------------------------------------------------------------------|--------|
| A_23_P96623  | 1.3  | -5.6 | -1.1 | 1.4  | OPN1MW | Homo sapiens opsin 1 (cone pigments), medium-wave-sensitive (OPN1MW), mRNA [NM_000513] | 2652   |
| A_23_P58934  | 1.1  | -1.4 | 1.0  | -2.2 | OPN5   | opsin 5 [Source:HGNC Symbol;Acc:19992] [ENST00000393699]                               | 221391 |
| A_23_P345564 | 1.0  | 1.0  | 2.1  | 1.0  | OPRL1  | Homo sapiens opiate receptor-like 1 (OPRL1), transcript variant 1, mRNA [NM_182647]    | 4987   |
| A_23_P145480 | -1.0 | -3.7 | -1.5 | -3.5 | OPRM1  | Homo sapiens opioid receptor, mu 1 (OPRM1), transcript variant MOR-1, mRNA [NM_000914] | 4988   |

|              |      |      |      |      |         |                                                                                                  |        |
|--------------|------|------|------|------|---------|--------------------------------------------------------------------------------------------------|--------|
| A_24_P397613 | -1.4 | -1.9 | -2.1 | -1.4 | OPRM1   | Homo sapiens opioid receptor, mu 1 (OPRM1), transcript variant MOR-1A, mRNA [NM_001008504]       | 4988   |
| A_23_P321935 | 1.1  | 1.0  | 1.0  | -2.8 | OSBP2   | Homo sapiens oxysterol binding protein 2 (OSBP2), transcript variant 1, mRNA [NM_030758]         | 23762  |
| A_24_P117902 | 2.4  | 1.3  | -3.2 | 1.6  | OSBPL10 | Homo sapiens oxysterol binding protein-like 10 (OSBPL10), transcript variant 1, mRNA [NM_017784] | 114884 |

|              |      |      |      |      |         |                                                                                                  |        |
|--------------|------|------|------|------|---------|--------------------------------------------------------------------------------------------------|--------|
| A_23_P147245 | 3.2  | 3.0  | 2.6  | -8.2 | OSBPL10 | Homo sapiens oxysterol binding protein-like 10 (OSBPL10), transcript variant 1, mRNA [NM_017784] | 114884 |
| A_23_P10442  | 1.1  | -3.9 | -1.0 | -1.0 | OSBPL1A | Homo sapiens oxysterol binding protein-like 1A (OSBPL1A), transcript variant 2, mRNA [NM_080597] | 114876 |
| A_23_P210995 | -3.5 | 1.2  | 1.1  | -1.3 | OSBPL2  | Homo sapiens oxysterol binding protein-like 2 (OSBPL2), transcript variant 2, mRNA [NM_144498]   | 9885   |

|              |      |      |      |      |        |                                                                                                |        |
|--------------|------|------|------|------|--------|------------------------------------------------------------------------------------------------|--------|
| A_24_P599340 | -4.2 | -1.1 | -1.1 | -1.1 | OSBPL3 | Homo sapiens oxysterol binding protein-like 3 (OSBPL3), transcript variant 1, mRNA [NM_015550] | 26031  |
| A_23_P53081  | -5.3 | 1.1  | -2.9 | -1.2 | OSBPL5 | Homo sapiens oxysterol binding protein-like 5 (OSBPL5), transcript variant 1, mRNA [NM_020896] | 114879 |
| A_32_P82671  | -2.5 | -3.8 | 1.1  | -1.1 | OSBPL9 | Homo sapiens oxysterol binding protein-like 9 (OSBPL9), transcript variant 7, mRNA [NM_148909] | 114883 |

|             |     |      |      |      |        |                                                                                                                                  |        |
|-------------|-----|------|------|------|--------|----------------------------------------------------------------------------------------------------------------------------------|--------|
| A_23_P50368 | 2.7 | 1.6  | 1.5  | 1.7  | OSCAR  | Homo sapiens osteoclast associated , immunoglobulin-like receptor (OSCAR), transcript variant 1, mRNA [NM_206818]                | 126014 |
| A_23_P50374 | 1.4 | -1.4 | -1.3 | -2.1 | OSCAR  | Homo sapiens osteoclast associated , immunoglobulin-like receptor (OSCAR), transcript variant 3, mRNA [NM_130771]                | 126014 |
| A_23_P77415 | 1.3 | 1.4  | -1.3 | -3.7 | OSGIN1 | Homo sapiens oxidative stress induced growth inhibitor 1 (OSGIN1), nuclear gene encoding mitochondrial protein, mRNA [NM_182981] | 29948  |

|              |      |      |      |      |        |                                                                                                                         |      |
|--------------|------|------|------|------|--------|-------------------------------------------------------------------------------------------------------------------------|------|
| A_23_P82859  | -8.6 | -1.0 | -1.1 | -1.0 | OSGIN2 | Homo sapiens oxidative stress induced growth inhibitor family member 2 (OSGIN2), transcript variant 2, mRNA [NM_004337] | 734  |
| A_23_P166408 | 1.4  | 2.5  | 1.4  | 1.4  | OSM    | Homo sapiens oncostatin M (OSM), mRNA [NM_020530]                                                                       | 5008 |
| A_23_P156289 | 2.5  | 2.5  | 1.3  | 3.9  | OSMR   | Homo sapiens oncostatin M receptor (OSMR), transcript variant 1, mRNA [NM_003999]                                       | 9180 |
| A_24_P145134 | -1.3 | 1.0  | 1.0  | -2.0 | OSMR   | Homo sapiens oncostatin M receptor (OSMR), transcript variant 2, mRNA [NM_001168355]                                    | 9180 |

|              |      |      |      |      |          |                                                                                                          |        |
|--------------|------|------|------|------|----------|----------------------------------------------------------------------------------------------------------|--------|
| A_24_P385732 | 1.0  | 2.3  | -1.1 | 1.0  | OSTalpha | Homo sapiens organic solute transporter alpha (OSTalpha), mRNA [NM_152672]                               | 200931 |
| A_23_P436284 | -1.0 | -1.1 | -1.2 | -2.1 | OSTBETA  | Homo sapiens organic solute transporter beta (OSTBETA), mRNA [NM_178859]                                 | 123264 |
| A_23_P411814 | 3.5  | 1.2  | 2.4  | 1.5  | OSTC     | Homo sapiens oligosaccharyltransferase complex subunit (OSTC), mRNA [NM_021227]                          | 58505  |
| A_24_P317450 | 10.4 | 20.1 | 9.5  | 20.5 | OSTCP1   | Homo sapiens oligosaccharyltransferase complex subunit pseudogene 1 (OSTCP1), non-coding RNA [NR_028496] | 202459 |



|              |      |       |      |      |       |                                                                                         |        |
|--------------|------|-------|------|------|-------|-----------------------------------------------------------------------------------------|--------|
| A_23_P60296  | 1.0  | -2.6  | -1.0 | 1.0  | OSTF1 | Homo sapiens osteoclast stimulating factor 1 (OSTF1), mRNA [NM_012383]                  | 26578  |
| A_23_P404785 | -5.5 | -17.9 | 1.0  | 1.1  | OSTM1 | Homo sapiens osteopetrosis associated transmembrane protein 1 (OSTM1), mRNA [NM_014028] | 28962  |
| A_23_P302634 | 1.6  | 1.6   | -2.2 | -1.2 | OTOGL | Homo sapiens otogelin-like (OTOGL), mRNA [NM_173591]                                    | 283310 |
| A_23_P306307 | -4.7 | 1.0   | -1.0 | -1.0 | OTOP1 | Homo sapiens otopetrin 1 (OTOP1), mRNA [NM_177998]                                      | 133060 |
| A_23_P365201 | 1.3  | 6.1   | 2.5  | 2.1  | OTOP3 | Homo sapiens otopetrin 3 (OTOP3), mRNA [NM_178233]                                      | 347741 |

|              |     |     |      |      |       |                                                                                                       |        |
|--------------|-----|-----|------|------|-------|-------------------------------------------------------------------------------------------------------|--------|
| A_23_P90997  | 1.4 | 2.0 | -2.5 | -1.6 | OTOS  | Homo sapiens otospiralin (OTOS), mRNA [NM_148961]                                                     | 150677 |
| A_23_P24375  | 2.2 | 2.7 | -3.8 | 2.1  | OTUB1 | Homo sapiens OTU domain, ubiquitin aldehyde binding 1 (OTUB1), transcript variant 1, mRNA [NM_017670] | 55611  |
| A_24_P124879 | 1.6 | 2.6 | 1.0  | 2.0  | OTUB2 | Homo sapiens OTU domain, ubiquitin aldehyde binding 2 (OTUB2), mRNA [NM_023112]                       | 78990  |
| A_23_P337550 | 1.6 | 2.3 | 2.9  | 1.4  | OTUD5 | Homo sapiens OTU domain containing 5 (OTUD5), transcript variant 1, mRNA [NM_017602]                  | 55593  |

|              |     |     |      |      |        |                                                                           |        |
|--------------|-----|-----|------|------|--------|---------------------------------------------------------------------------|--------|
| A_24_P42389  | 2.7 | 6.2 | 4.0  | 1.5  | OTUD6A | Homo sapiens OTU domain containing 6A (OTUD6A), mRNA [NM_207320]          | 139562 |
| A_24_P318400 | 1.9 | 2.8 | 2.8  | 1.0  | OTUD7A | Homo sapiens OTU domain containing 7A (OTUD7A), mRNA [NM_130901]          | 161725 |
| A_23_P3413   | 1.3 | 1.7 | 2.4  | -1.3 | OTUD7A | Homo sapiens OTU domain containing 7A (OTUD7A), mRNA [NM_130901]          | 161725 |
| A_24_P912691 | 1.6 | 2.0 | -1.6 | 1.3  | OTUD7A | OTU domain containing 7A [Source:HGNC Symbol;Acc:20718] [ENST00000307050] | 161725 |

|              |      |      |      |      |        |                                                                                      |       |
|--------------|------|------|------|------|--------|--------------------------------------------------------------------------------------|-------|
| A_23_P138157 | 2.2  | 2.2  | 2.2  | -2.3 | OTUD7B | Homo sapiens OTU domain containing 7B (OTUD7B), mRNA [NM_020205]                     | 56957 |
| A_24_P359799 | -2.8 | -1.9 | -1.2 | -2.2 | OTX1   | Homo sapiens orthodenticle homeobox 1 (OTX1), transcript variant 1, mRNA [NM_014562] | 5013  |
| A_24_P39195  | -7.2 | 1.0  | 1.0  | 1.0  | OXGR1  | Homo sapiens oxoglutarate (alpha-ketoglutarate) receptor 1 (OXGR1), mRNA [NM_080818] | 27199 |
| A_23_P418413 | 2.4  | 2.3  | 2.2  | 2.4  | OXSR1  | Homo sapiens oxidative-stress responsive 1 (OXSR1), mRNA [NM_005109]                 | 9943  |

|              |      |     |      |      |       |                                                                                             |      |
|--------------|------|-----|------|------|-------|---------------------------------------------------------------------------------------------|------|
| A_24_P337104 | -2.3 | 1.3 | -1.1 | 1.7  | OXTR  | Homo sapiens oxytocin receptor (OXTR), mRNA [NM_000916]                                     | 5021 |
| A_23_P132619 | 10.2 | 9.8 | 9.4  | 10.5 | OXTR  | Homo sapiens oxytocin receptor (OXTR), mRNA [NM_000916]                                     | 5021 |
| A_23_P372848 | 2.1  | 1.4 | 1.4  | -1.1 | P2RX1 | Homo sapiens purinergic receptor P2X, ligand-gated ion channel, 1 (P2RX1), mRNA [NM_002558] | 5023 |
| A_23_P127721 | -4.0 | 1.6 | 2.3  | 1.7  | P2RX3 | Homo sapiens purinergic receptor P2X, ligand-gated ion channel, 3 (P2RX3), mRNA [NM_002559] | 5024 |

|              |      |      |      |      |        |                                                                                                                   |       |
|--------------|------|------|------|------|--------|-------------------------------------------------------------------------------------------------------------------|-------|
| A_23_P53623  | -1.8 | -4.5 | -1.9 | -1.8 | P2RX4  | Homo sapiens purinergic receptor P2X, ligand-gated ion channel, 4 (P2RX4), mRNA [NM_002560]                       | 5025  |
| A_23_P433785 | 1.2  | -1.0 | -2.1 | 1.4  | P2RX5  | Homo sapiens purinergic receptor P2X, ligand-gated ion channel, 5 (P2RX5), transcript variant 1, mRNA [NM_002561] | 5026  |
| A_23_P346376 | 16.6 | 16.7 | 17.3 | 9.8  | P2RY10 | Homo sapiens purinergic receptor P2Y, G-protein coupled, 10 (P2RY10), transcript variant 1, mRNA [NM_014499]      | 27334 |

|              |      |      |      |      |       |                                                                                                                  |        |
|--------------|------|------|------|------|-------|------------------------------------------------------------------------------------------------------------------|--------|
| A_23_P114307 | -1.1 | -1.1 | -3.1 | 1.7  | P2RY4 | Homo sapiens pyrimidinergetic receptor P2Y, G-protein coupled, 4 (P2RY4), mRNA [NM_002565]                       | 5030   |
| A_23_P64611  | 1.9  | 2.3  | 3.7  | 2.2  | P2RY6 | Homo sapiens pyrimidinergetic receptor P2Y, G-protein coupled, 6 (P2RY6), transcript variant 2, mRNA [NM_176798] | 5031   |
| A_24_P340128 | -1.1 | -1.0 | -2.2 | -1.1 | P2RY8 | Homo sapiens purinergic receptor P2Y, G-protein coupled, 8 (P2RY8), mRNA [NM_178129]                             | 286530 |

|              |      |      |      |      |       |                                                                                                            |      |
|--------------|------|------|------|------|-------|------------------------------------------------------------------------------------------------------------|------|
| A_23_P18966  | 3.7  | -1.0 | 1.1  | -1.9 | P4HA2 | Homo sapiens prolyl 4-hydroxylase, alpha polypeptide II (P4HA2), transcript variant 2, mRNA [NM_001017973] | 8974 |
| A_24_P213684 | 82.3 | 80.4 | 74.6 | 85.5 | P4HB  | Homo sapiens mRNA for OK/SW-CL.24, complete cds. [AB062434]                                                | 5034 |
| A_23_P107412 | -2.1 | 1.0  | 1.1  | 1.0  | P4HB  | Homo sapiens prolyl 4-hydroxylase, beta polypeptide (P4HB), mRNA [NM_000918]                               | 5034 |



|              |       |      |      |      |       |                                                                                                                          |       |
|--------------|-------|------|------|------|-------|--------------------------------------------------------------------------------------------------------------------------|-------|
| A_23_P113311 | -14.5 | 1.1  | 1.3  | -1.1 | P4HTM | Homo sapiens prolyl 4-hydroxylase, transmembrane (endoplasmic reticulum) (P4HTM), transcript variant 3, mRNA [NM_177938] | 54681 |
| A_32_P11181  | -1.9  | 2.1  | -1.4 | 1.1  | PA2G4 | Homo sapiens proliferation-associated 2G4, 38kDa (PA2G4), mRNA [NM_006191]                                               | 5036  |
| A_24_P221123 | -1.8  | -1.6 | -2.2 | -1.0 | PA2G4 | Homo sapiens proliferation-associated 2G4, 38kDa (PA2G4), mRNA [NM_006191]                                               | 5036  |

|              |      |      |      |      |         |                                                                                              |       |
|--------------|------|------|------|------|---------|----------------------------------------------------------------------------------------------|-------|
| A_23_P139339 | -1.0 | -1.1 | -2.6 | -1.2 | PAAF1   | Homo sapiens proteasomal ATPase-associated factor 1 (PAAF1), mRNA [NM_025155]                | 80227 |
| A_23_P436484 | 1.0  | 1.1  | -2.2 | -1.0 | PABPC1L | poly(A) binding protein, cytoplasmic 1-like [Source:HGNC Symbol;Acc:15797] [ENST00000372821] | 80336 |
| A_23_P309599 | 1.1  | 1.7  | -4.4 | 1.1  | PABPC1L | poly(A) binding protein, cytoplasmic 1-like [Source:HGNC Symbol;Acc:15797] [ENST00000372826] | 80336 |
| A_24_P92183  | -2.0 | -7.2 | -3.0 | -4.7 | PABPC1L | Homo sapiens poly(A) binding protein, cytoplasmic 1-like (PABPC1L), mRNA [NM_001124756]      | 80336 |

|              |      |      |      |      |           |                                                                                                            |        |
|--------------|------|------|------|------|-----------|------------------------------------------------------------------------------------------------------------|--------|
| A_24_P162454 | 1.5  | 1.0  | 2.3  | -1.7 | PABPC1L2B | Homo sapiens poly(A) binding protein, cytoplasmic 1-like 2B (PABPC1L2B), mRNA [NM_001042506]               | 645974 |
| A_23_P48307  | -1.1 | -1.3 | -3.8 | -1.7 | PABPC3    | Homo sapiens poly(A) binding protein, cytoplasmic 3 (PABPC3), mRNA [NM_030979]                             | 5042   |
| A_23_P500282 | 1.1  | 2.8  | 2.0  | 1.4  | PACS1     | Homo sapiens phosphofurin acidic cluster sorting protein 1 (PACS1), mRNA [NM_018026]                       | 55690  |
| A_24_P255628 | 1.0  | -1.0 | -1.1 | -2.7 | PACS2     | Homo sapiens phosphofurin acidic cluster sorting protein 2 (PACS2), transcript variant 2, mRNA [NM_015197] | 23241  |

|              |      |      |     |     |         |                                                                                                                          |       |
|--------------|------|------|-----|-----|---------|--------------------------------------------------------------------------------------------------------------------------|-------|
| A_23_P80377  | -1.2 | -2.8 | 1.2 | 1.5 | PACSIN2 | Homo sapiens protein kinase C and casein kinase substrate in neurons 2 (PACSIN2), transcript variant 2, mRNA [NM_007229] | 11252 |
| A_23_P138262 | 6.3  | 6.3  | 5.7 | 5.8 | PADI4   | Homo sapiens peptidyl arginine deiminase, type IV (PADI4), mRNA [NM_012387]                                              | 23569 |
| A_23_P369502 | 1.6  | 2.0  | 3.1 | 1.8 | PADI4   | Homo sapiens peptidyl arginine deiminase, type IV (PADI4), mRNA [NM_012387]                                              | 23569 |

|              |      |       |      |      |        |                                                                                                            |        |
|--------------|------|-------|------|------|--------|------------------------------------------------------------------------------------------------------------|--------|
| A_24_P216087 | -1.5 | -11.1 | 1.0  | 1.3  | PAF1   | Homo sapiens Paf1, RNA polymerase II associated factor, homolog (S. cerevisiae) (PAF1), mRNA [NM_019088]   | 54623  |
| A_23_P207811 | 1.3  | 3.2   | -1.8 | 1.2  | PAIP1  | Homo sapiens poly(A) binding protein interacting protein 1 (PAIP1), transcript variant 1, mRNA [NM_006451] | 10605  |
| A_23_P301053 | -1.8 | 1.6   | -1.6 | -5.8 | PAIP2B | Homo sapiens poly(A) binding protein interacting protein 2B (PAIP2B), mRNA [NM_020459]                     | 400961 |

|              |      |      |      |      |      |                                                                                                        |      |
|--------------|------|------|------|------|------|--------------------------------------------------------------------------------------------------------|------|
| A_23_P327307 | 21.0 | 12.5 | 13.6 | 8.0  | PAK2 | Homo sapiens p21 protein (Cdc42/Rac)-activated kinase 2 (PAK2), mRNA [NM_002577]                       | 5062 |
| A_32_P104075 | -2.5 | -1.5 | -1.0 | -1.4 | PAK2 | Homo sapiens p21 protein (Cdc42/Rac)-activated kinase 2 (PAK2), mRNA [NM_002577]                       | 5062 |
| A_23_P346813 | -2.2 | 1.1  | -1.1 | -1.0 | PAK3 | Homo sapiens p21 protein (Cdc42/Rac)-activated kinase 3 (PAK3), transcript variant 2, mRNA [NM_002578] | 5063 |

|              |      |       |      |      |       |                                                                                                        |        |
|--------------|------|-------|------|------|-------|--------------------------------------------------------------------------------------------------------|--------|
| A_24_P313822 | -7.4 | 1.1   | -1.0 | 4.0  | PAK4  | Homo sapiens p21 protein (Cdc42/Rac)-activated kinase 4 (PAK4), transcript variant 1, mRNA [NM_005884] | 10298  |
| A_23_P208991 | -2.2 | -24.8 | -1.3 | -1.1 | PALM  | Homo sapiens paralemmin (PALM), transcript variant 1, mRNA [NM_002579]                                 | 5064   |
| A_32_P198177 | 1.5  | -2.1  | 1.4  | -1.0 | PALM3 | Homo sapiens paralemmin 3 (PALM3), mRNA [NM_001145028]                                                 | 342979 |
| A_23_P23669  | 2.1  | -5.3  | 1.4  | -3.1 | PALMD | Homo sapiens palmdelphin (PALMD), mRNA [NM_017734]                                                     | 54873  |

|              |      |       |      |      |       |                                                                                                          |        |
|--------------|------|-------|------|------|-------|----------------------------------------------------------------------------------------------------------|--------|
| A_23_P385938 | -3.2 | 1.2   | 1.2  | 1.5  | PAN3  | Homo sapiens PAN3 poly(A) specific ribonuclease subunit homolog (S. cerevisiae) (PAN3), mRNA [NM_175854] | 255967 |
| A_24_P921032 | 2.4  | 1.4   | 1.3  | -1.2 | PANK3 | pantothenate kinase 3 [Source:HGNC Symbol;Acc:19365] [ENST0000239231]                                    | 79646  |
| A_23_P47155  | 1.9  | -3.4  | 1.5  | 1.6  | PANX1 | Homo sapiens pannexin 1 (PANX1), mRNA [NM_015368]                                                        | 24145  |
| A_23_P52634  | -1.1 | -15.4 | -4.1 | -1.4 | PANX1 | Homo sapiens pannexin 1 (PANX1), mRNA [NM_015368]                                                        | 24145  |



|              |      |      |      |      |       |                                                                                                    |        |
|--------------|------|------|------|------|-------|----------------------------------------------------------------------------------------------------|--------|
| A_23_P155162 | 2.2  | 1.2  | 1.1  | -1.0 | PANX2 | Homo sapiens pannexin 2 (PANX2), transcript variant 2, mRNA [NM_001160300]                         | 56666  |
| A_23_P87072  | -6.9 | -4.5 | -3.9 | -2.3 | PANX3 | Homo sapiens pannexin 3 (PANX3), mRNA [NM_052959]                                                  | 116337 |
| A_24_P940197 | 4.5  | 5.6  | 4.2  | 3.5  | PAPD5 | Homo sapiens PAP associated domain containing 5 (PAPD5), transcript variant 1, mRNA [NM_001040284] | 64282  |
| A_23_P18824  | 1.0  | -1.5 | -2.5 | 1.0  | PAPD7 | Homo sapiens PAP associated domain containing 7 (PAPD7), transcript variant 1, mRNA [NM_006999]    | 11044  |

|              |      |      |      |       |        |                                                                                         |        |
|--------------|------|------|------|-------|--------|-----------------------------------------------------------------------------------------|--------|
| A_24_P53406  | 1.3  | 1.0  | -1.0 | -10.0 | PAPL   | Homo sapiens iron/zinc purple acid phosphatase-like protein (PAPL), mRNA [NM_001004318] | 390928 |
| A_23_P333640 | -1.8 | -2.7 | -2.5 | -22.6 | PAPLN  | Homo sapiens papilin, proteoglycan-like sulfated glycoprotein (PAPLN), mRNA [NM_173462] | 89932  |
| A_23_P140347 | 2.0  | 1.5  | -1.1 | -3.9  | PAPLN  | Homo sapiens papilin, proteoglycan-like sulfated glycoprotein (PAPLN), mRNA [NM_173462] | 89932  |
| A_23_P99559  | -1.0 | -1.5 | -6.1 | -1.6  | PAPOLA | Homo sapiens poly(A) polymerase alpha (PAPOLA), transcript variant 1, mRNA [NM_032632]  | 10914  |

|              |      |      |      |      |        |                                                                                            |       |
|--------------|------|------|------|------|--------|--------------------------------------------------------------------------------------------|-------|
| A_23_P419051 | 1.1  | -6.8 | -1.3 | 1.6  | PAPOLA | Homo sapiens poly(A) polymerase alpha (PAPOLA), transcript variant 1, mRNA [NM_032632]     | 10914 |
| A_24_P141995 | -1.5 | 1.4  | -1.2 | 2.0  | PAPOLA | Homo sapiens poly(A) polymerase alpha (PAPOLA), transcript variant 1, mRNA [NM_032632]     | 10914 |
| A_24_P807883 | 1.1  | 1.1  | -2.8 | -1.0 | PAPOLG | Homo sapiens poly(A) polymerase gamma (PAPOLG), mRNA [NM_022894]                           | 64895 |
| A_23_P216742 | 1.0  | -1.3 | -1.0 | -2.2 | PAPPA  | Homo sapiens pregnancy-associated plasma protein A, pappalysin 1 (PAPPA), mRNA [NM_002581] | 5069  |

|              |      |      |      |      |        |                                                                                                                   |        |
|--------------|------|------|------|------|--------|-------------------------------------------------------------------------------------------------------------------|--------|
| A_24_P940166 | 1.0  | 1.0  | 1.0  | 2.0  | PAPSS2 | Homo sapiens 3'-phosphoadenosine 5'-phosphosulfate synthase 2 (PAPSS2), transcript variant 2, mRNA [NM_001015880] | 9060   |
| A_23_P167276 | -1.8 | -2.1 | -2.2 | -1.7 | PAQR3  | Homo sapiens progesterin and adiponectin receptor family member 3 (PAQR3), mRNA [NM_001040202]                    | 152559 |
| A_23_P337875 | -1.1 | -1.1 | 1.4  | 7.5  | PAQR3  | Homo sapiens progesterin and adiponectin receptor family member 3 (PAQR3), mRNA [NM_001040202]                    | 152559 |

|              |     |      |      |     |       |                                                                                                             |        |
|--------------|-----|------|------|-----|-------|-------------------------------------------------------------------------------------------------------------|--------|
| A_23_P97283  | 5.3 | 7.7  | 3.9  | 5.0 | PAQR6 | Homo sapiens progestin and adipoQ receptor family member VI (PAQR6), transcript variant 1, mRNA [NM_024897] | 79957  |
| A_23_P410159 | 1.7 | -1.6 | -2.2 | 1.2 | PAQR7 | Homo sapiens progestin and adipoQ receptor family member VII (PAQR7), mRNA [NM_178422]                      | 164091 |
| A_32_P538180 | 1.6 | 2.2  | 1.5  | 1.4 | PAQR7 | Homo sapiens progestin and adipoQ receptor family member VII (PAQR7), mRNA [NM_178422]                      | 164091 |

|              |     |     |      |     |       |                                                                                                                  |        |
|--------------|-----|-----|------|-----|-------|------------------------------------------------------------------------------------------------------------------|--------|
| A_24_P334640 | 2.9 | 1.8 | 2.2  | 1.4 | PAQR8 | Homo sapiens progestin and adipoQ receptor family member VIII (PAQR8), mRNA [NM_133367]                          | 85315  |
| A_32_P196193 | 1.2 | 1.1 | 1.0  | 7.3 | PAQR9 | Homo sapiens progestin and adipoQ receptor family member IX (PAQR9), mRNA [NM_198504]                            | 344838 |
| A_23_P201963 | 1.3 | 1.5 | -1.5 | 2.6 | PARD3 | Homo sapiens par-3 partitioning defective 3 homolog (C. elegans) (PARD3), transcript variant 1, mRNA [NM_019619] | 56288  |

|              |      |      |      |      |        |                                                                                               |        |
|--------------|------|------|------|------|--------|-----------------------------------------------------------------------------------------------|--------|
| A_32_P83203  | -2.7 | -5.2 | -2.5 | 1.0  | PARD3B | Homo sapiens par-3 partitioning defective 3 homolog B (C. elegans) (PARD3B), mRNA [NM_205863] | 117583 |
| A_24_P34534  | 18.5 | 28.2 | 17.3 | 18.4 | PARD3B | Homo sapiens par-3 partitioning defective 3 homolog B (C. elegans) (PARD3B), mRNA [NM_152526] | 117583 |
| A_24_P101248 | -1.1 | 2.1  | 1.0  | -1.0 | PARD3B | Homo sapiens par-3 partitioning defective 3 homolog B (C. elegans) (PARD3B), mRNA [NM_152526] | 117583 |

|              |      |      |      |      |        |                                                                                                                         |       |
|--------------|------|------|------|------|--------|-------------------------------------------------------------------------------------------------------------------------|-------|
| A_23_P140821 | 1.8  | 2.4  | -1.5 | 1.1  | PARD6A | Homo sapiens par-6 partitioning defective 6 homolog alpha (C. elegans) (PARD6A), transcript variant 1, mRNA [NM_016948] | 50855 |
| A_23_P147465 | -1.2 | 1.4  | -2.2 | -1.6 | PARK2  | Homo sapiens parkinson protein 2, E3 ubiquitin protein ligase (parkin) (PARK2), transcript variant 1, mRNA [NM_004562]  | 5071  |
| A_23_P74740  | -3.5 | -1.0 | -1.1 | 1.0  | PARK7  | Homo sapiens parkinson protein 7 (PARK7), transcript variant 1, mRNA [NM_007262]                                        | 11315 |



|              |      |     |     |     |        |                                                                                                            |       |
|--------------|------|-----|-----|-----|--------|------------------------------------------------------------------------------------------------------------|-------|
| A_24_P340853 | 1.8  | 1.8 | 2.2 | 1.4 | PARP10 | Homo sapiens poly (ADP-ribose) polymerase family, member 10 (PARP10), mRNA [NM_032789]                     | 84875 |
| A_24_P402779 | 2.8  | 4.9 | 3.7 | 3.6 | PARP3  | Homo sapiens poly (ADP-ribose) polymerase family, member 3 (PARP3), transcript variant 2, mRNA [NM_005485] | 10039 |
| A_32_P144342 | -2.9 | 1.0 | 1.0 | 1.0 | PARP4  | Homo sapiens poly (ADP-ribose) polymerase family, member 4 (PARP4), mRNA [NM_006437]                       | 143   |
| A_23_P163258 | 1.5  | 1.3 | 1.3 | 2.2 | PARP6  | Homo sapiens poly (ADP-ribose) polymerase family, member 6 (PARP6), mRNA [NM_020214]                       | 56965 |

|              |      |     |     |      |       |                                                                                                                                        |       |
|--------------|------|-----|-----|------|-------|----------------------------------------------------------------------------------------------------------------------------------------|-------|
| A_23_P121898 | 3.9  | 3.8 | 1.6 | 2.0  | PARP8 | Homo sapiens poly (ADP-ribose) polymerase family, member 8 (PARP8), transcript variant 2, mRNA [NM_024615]                             | 79668 |
| A_23_P51291  | -1.5 | 1.1 | 2.2 | -2.0 | PARS2 | Homo sapiens prolyl-tRNA synthetase 2, mitochondrial (putative) (PARS2), nuclear gene encoding mitochondrial protein, mRNA [NM_152268] | 25973 |

|              |      |      |      |      |       |                                                                                                                                      |       |
|--------------|------|------|------|------|-------|--------------------------------------------------------------------------------------------------------------------------------------|-------|
| A_23_P335277 | -1.0 | -2.2 | -1.0 | -3.8 | PART1 | Homo sapiens prostate androgen-regulated transcript 1 (non-protein coding) (PART1), transcript variant 2, non-coding RNA [NR_028508] | 25859 |
| A_24_P124370 | -1.1 | -6.5 | -1.1 | -2.3 | PARVA | Homo sapiens parvin, alpha (PARVA), mRNA [NM_018222]                                                                                 | 55742 |
| A_23_P47642  | 1.3  | 1.2  | 1.2  | -2.3 | PARVA | Homo sapiens parvin, alpha (PARVA), mRNA [NM_018222]                                                                                 | 55742 |
| A_23_P250413 | 2.1  | 1.2  | 1.0  | -1.9 | PARVG | Homo sapiens parvin, gamma (PARVG), transcript variant 1, mRNA [NM_022141]                                                           | 64098 |

|              |      |      |      |     |       |                                                                                                              |        |
|--------------|------|------|------|-----|-------|--------------------------------------------------------------------------------------------------------------|--------|
| A_23_P408239 | 1.0  | 2.1  | -1.1 | 1.4 | PASK  | Homo sapiens PAS domain containing serine/threonine kinase (PASK), transcript variant 5, mRNA [NM_001252124] | 23178  |
| A_23_P373079 | 2.9  | 2.8  | 2.2  | 1.9 | PATL1 | Homo sapiens protein associated with topoisomerase II homolog 1 (yeast) (PATL1), mRNA [NM_152716]            | 219988 |
| A_23_P211459 | -1.1 | -2.5 | -1.3 | 1.0 | PATZ1 | Homo sapiens POZ (BTB) and AT hook containing zinc finger 1 (PATZ1), transcript variant 1, mRNA [NM_014323]  | 23598  |
| A_23_P6130   | 1.6  | -2.8 | -1.5 | 1.2 | PAX1  | Homo sapiens paired box 1 (PAX1), mRNA [NM_006192]                                                           | 5075   |

|              |      |      |      |      |      |                                                                                    |      |
|--------------|------|------|------|------|------|------------------------------------------------------------------------------------|------|
| A_23_P209499 | -1.0 | -1.0 | -1.1 | 3.6  | PAX3 | Homo sapiens paired box 3 (PAX3), transcript variant PAX3D, mRNA [NM_181458]       | 5077 |
| A_23_P414211 | -2.6 | 1.8  | -1.3 | -1.2 | PAX4 | Homo sapiens paired box 4 (PAX4), mRNA [NM_006193]                                 | 5078 |
| A_23_P59691  | 2.4  | -1.1 | 1.1  | 1.2  | PAX4 | Homo sapiens paired-box transcription factor (PAX4) mRNA, complete cds. [AF043978] | 5078 |
| A_23_P1823   | 1.8  | -1.1 | -2.3 | -2.4 | PAX6 | Homo sapiens paired box 6 (PAX6), transcript variant 1, mRNA [NM_000280]           | 5080 |

|              |      |     |      |      |      |                                                                              |       |
|--------------|------|-----|------|------|------|------------------------------------------------------------------------------|-------|
| A_23_P500985 | -8.9 | 1.2 | -1.7 | -1.5 | PAX7 | Homo sapiens paired box 7 (PAX7), transcript variant 2, mRNA [NM_013945]     | 5081  |
| A_23_P126225 | -1.3 | 1.2 | -2.8 | -1.7 | PAX7 | Homo sapiens paired box 7 (PAX7), transcript variant 2, mRNA [NM_013945]     | 5081  |
| A_23_P210001 | -2.6 | 3.0 | 2.4  | 2.9  | PAX8 | Homo sapiens paired box 8 (PAX8), transcript variant PAX8A, mRNA [NM_003466] | 7849  |
| A_32_P62997  | 1.4  | 1.3 | 1.0  | 3.5  | PBK  | Homo sapiens PDZ binding kinase (PBK), mRNA [NM_018492]                      | 55872 |

|              |      |      |      |      |      |                                                                                                                      |       |
|--------------|------|------|------|------|------|----------------------------------------------------------------------------------------------------------------------|-------|
| A_24_P312519 | -1.1 | -2.3 | -1.1 | 1.1  | PBLD | Homo sapiens phenazine biosynthesis-like protein domain containing (PBLD), transcript variant 2, mRNA [NM_001033083] | 64081 |
| A_24_P112395 | -3.8 | 1.6  | 1.4  | -1.1 | PBLD | Homo sapiens phenazine biosynthesis-like protein domain containing (PBLD), transcript variant 1, mRNA [NM_022129]    | 64081 |
| A_24_P126484 | -1.0 | -1.0 | -2.2 | -1.9 | PBLD | phenazine biosynthesis-like protein domain containing [Source:HGNC Symbol;Accession:23301] [ENST00000277795]         | 64081 |

|              |      |      |      |      |       |                                                                                            |       |
|--------------|------|------|------|------|-------|--------------------------------------------------------------------------------------------|-------|
| A_23_P365874 | 1.0  | -1.1 | -2.2 | -1.1 | PBRM1 | Homo sapiens polybromo 1 (PBRM1), transcript variant 2, mRNA [NM_018313]                   | 55193 |
| A_24_P247849 | 3.6  | 3.6  | 2.8  | 4.7  | PBX1  | pre-B-cell leukemia homeobox 1 [Source:HGNC Symbol;Acc:8632] [ENST00000474046]             | 5087  |
| A_23_P62953  | -2.5 | 1.6  | -1.3 | 1.0  | PBX1  | Homo sapiens pre-B-cell leukemia homeobox 1 (PBX1), transcript variant 1, mRNA [NM_002585] | 5087  |
| A_23_P214658 | -1.3 | -4.3 | -1.4 | -1.4 | PBX2  | Homo sapiens pre-B-cell leukemia homeobox 2 (PBX2), mRNA [NM_002586]                       | 5089  |



|              |      |      |      |      |       |                                                                                                                                            |      |
|--------------|------|------|------|------|-------|--------------------------------------------------------------------------------------------------------------------------------------------|------|
| A_23_P367405 | -1.3 | -1.0 | -1.2 | -2.8 | PCBD1 | Homo sapiens pterin-4 alpha-carbinolamine dehydratase/dimerization cofactor of hepatocyte nuclear factor 1 alpha (PCBD1), mRNA [NM_000281] | 5092 |
| A_24_P141688 | 2.1  | 1.6  | 1.5  | -2.3 | PCBP2 | Homo sapiens poly(rC) binding protein 2 (PCBP2), transcript variant 1, mRNA [NM_005016]                                                    | 5094 |

|              |     |     |      |      |       |                                                                                                                                                      |      |
|--------------|-----|-----|------|------|-------|------------------------------------------------------------------------------------------------------------------------------------------------------|------|
| A_23_P121051 | 1.0 | 1.0 | -2.0 | -1.5 | PCCB  | Homo sapiens propionyl CoA carboxylase, beta polypeptide (PCCB), nuclear gene encoding mitochondrial protein, transcript variant 1, mRNA [NM_000532] | 5096 |
| A_24_P302797 | 2.5 | 1.6 | 2.5  | 2.3  | PCCB  | Homo sapiens propionyl CoA carboxylase, beta polypeptide (PCCB), nuclear gene encoding mitochondrial protein, transcript variant 1, mRNA [NM_000532] | 5096 |
| A_23_P213359 | 1.9 | 1.3 | 2.3  | 3.3  | PCDH1 | Homo sapiens protocadherin 1 (PCDH1), transcript variant 1, mRNA [NM_002587]                                                                         | 5097 |

|              |      |       |      |     |        |                                                                                        |       |
|--------------|------|-------|------|-----|--------|----------------------------------------------------------------------------------------|-------|
| A_24_P234838 | 1.5  | 2.5   | 1.6  | 1.2 | PCDH1  | Homo sapiens protocadherin 1 (PCDH1), transcript variant 2, mRNA [NM_032420]           | 5097  |
| A_23_P158851 | -3.2 | 1.2   | 1.2  | 1.0 | PCDH10 | Homo sapiens protocadherin 10 (PCDH10), transcript variant 1, mRNA [NM_032961]         | 57575 |
| A_23_P161331 | 1.0  | -20.9 | -1.0 | 1.1 | PCDH15 | Homo sapiens protocadherin-related 15 (PCDH15), transcript variant C, mRNA [NM_033056] | 65217 |
| A_24_P911906 | 1.3  | 1.3   | -3.5 | 1.0 | PCDH17 | Homo sapiens protocadherin 17 (PCDH17), mRNA [NM_001040429]                            | 27253 |

|              |      |      |      |      |        |                                                                                 |       |
|--------------|------|------|------|------|--------|---------------------------------------------------------------------------------|-------|
| A_24_P419039 | 1.1  | 1.1  | 2.5  | 1.4  | PCDH19 | Homo sapiens protocadherin 19 (PCDH19), transcript variant 2, mRNA [NM_020766]  | 57526 |
| A_24_P914638 | -1.3 | 2.8  | 1.5  | 1.0  | PCDH7  | Homo sapiens protocadherin 7 (PCDH7), transcript variant d, mRNA [NM_001173523] | 5099  |
| A_23_P378364 | 1.4  | -1.1 | -1.6 | -2.1 | PCDH7  | Homo sapiens protocadherin 7 (PCDH7), transcript variant c, mRNA [NM_032457]    | 5099  |
| A_23_P420236 | -1.0 | 1.1  | -1.1 | -2.2 | PCDH9  | Homo sapiens protocadherin 9 (PCDH9), transcript variant 1, mRNA [NM_203487]    | 5101  |

|              |      |      |      |      |         |                                                                                       |       |
|--------------|------|------|------|------|---------|---------------------------------------------------------------------------------------|-------|
| A_24_P187218 | -9.1 | -1.0 | -1.0 | -1.6 | PCDH9   | Homo sapiens protocadherin 9 (PCDH9), transcript variant 2, mRNA [NM_020403]          | 5101  |
| A_24_P360206 | 2.2  | -1.9 | -1.4 | -1.4 | PCDHA11 | Homo sapiens protocadherin alpha 11 (PCDHA11), transcript variant 1, mRNA [NM_018902] | 56138 |
| A_23_P325498 | 3.9  | 14.6 | 5.7  | 8.6  | PCDHA8  | Homo sapiens protocadherin alpha 8 (PCDHA8), transcript variant 2, mRNA [NM_031856]   | 56140 |
| A_23_P110462 | 1.0  | -1.3 | 2.2  | 1.1  | PCDHB1  | Homo sapiens protocadherin beta 1 (PCDHB1), mRNA [NM_013340]                          | 29930 |

|              |      |      |      |      |         |                                                                |       |
|--------------|------|------|------|------|---------|----------------------------------------------------------------|-------|
| A_23_P7397   | 1.0  | -1.8 | -3.0 | 1.0  | PCDHB10 | Homo sapiens protocadherin beta 10 (PCDHB10), mRNA [NM_018930] | 56126 |
| A_23_P167401 | 1.2  | 1.9  | 3.1  | 2.0  | PCDHB11 | Homo sapiens protocadherin beta 11 (PCDHB11), mRNA [NM_018931] | 56125 |
| A_23_P156010 | -1.0 | 1.1  | -4.4 | -1.0 | PCDHB12 | Homo sapiens protocadherin beta 12 (PCDHB12), mRNA [NM_018932] | 56124 |
| A_23_P30200  | -1.0 | -6.4 | -1.1 | 1.2  | PCDHB16 | Homo sapiens protocadherin beta 16 (PCDHB16), mRNA [NM_020957] | 57717 |
| A_24_P243373 | -1.5 | -1.6 | -2.6 | 1.4  | PCDHB7  | Homo sapiens protocadherin beta 7 (PCDHB7), mRNA [NM_018940]   | 56129 |

|              |       |      |       |      |         |                                                                                                   |       |
|--------------|-------|------|-------|------|---------|---------------------------------------------------------------------------------------------------|-------|
| A_24_P380284 | -2.4  | -1.7 | -6.6  | -2.3 | PCDHB9  | Homo sapiens protocadherin beta 9 (PCDHB9), mRNA [NM_019119]                                      | 56127 |
| A_23_P422044 | -10.8 | 1.6  | 1.1   | 1.8  | PCDHGA2 | Homo sapiens protocadherin gamma subfamily A, 2 (PCDHGA2), transcript variant 2, mRNA [NM_032009] | 56113 |
| A_23_P435444 | 1.4   | 1.5  | -19.6 | -1.4 | PCDHGA7 | Homo sapiens protocadherin gamma subfamily A, 7 (PCDHGA7), transcript variant 2, mRNA [NM_032087] | 56108 |

|              |      |      |      |      |          |                                                                                                   |       |
|--------------|------|------|------|------|----------|---------------------------------------------------------------------------------------------------|-------|
| A_23_P364414 | -2.5 | -1.0 | -2.1 | -1.1 | PCDHGA9  | Homo sapiens protocadherin gamma subfamily A, 9 (PCDHGA9), transcript variant 2, mRNA [NM_032089] | 56107 |
| A_23_P395418 | -2.5 | 1.1  | -1.0 | -1.0 | PCDHGB3  | Homo sapiens protocadherin gamma subfamily B, 3 (PCDHGB3), transcript variant 2, mRNA [NM_032097] | 56102 |
| A_24_P177531 | -1.0 | -1.0 | -5.5 | -1.1 | PCDHGB8P | Homo sapiens protocadherin gamma subfamily B, 8 pseudogene (PCDHGB8P), non-coding RNA [NR_001297] | 56120 |



|              |      |      |      |      |       |                                                                                                                                                                               |       |
|--------------|------|------|------|------|-------|-------------------------------------------------------------------------------------------------------------------------------------------------------------------------------|-------|
| A_24_P932479 | 1.2  | 1.2  | 1.1  | -3.7 | PCF11 | PCF11,<br>cleavage<br>and<br>polyadenyl<br>ation<br>factor<br>subunit,<br>homolog<br>(S.<br>cerevisiae)<br>[Source:H<br>GNC<br>Symbol;Ac<br>c:30097]<br>[ENST0000<br>0298281] | 51585 |
| A_23_P348323 | -1.4 | -2.2 | -3.1 | -2.3 | PCGF2 | Homo<br>sapiens<br>polycomb<br>group ring<br>finger 2<br>(PCGF2),<br>mRNA<br>[NM_0071<br>44]                                                                                  | 7703  |
| A_23_P21346  | 1.1  | -2.1 | -1.0 | -1.0 | PCGF3 | Homo<br>sapiens<br>polycomb<br>group ring<br>finger 3<br>(PCGF3),<br>mRNA<br>[NM_0063<br>15]                                                                                  | 10336 |
| A_23_P210496 | 2.8  | 1.7  | 1.1  | 2.8  | PCIF1 | Homo<br>sapiens<br>PDX1 C-<br>terminal<br>inhibiting<br>factor 1<br>(PCIF1),<br>mRNA<br>[NM_0221<br>04]                                                                       | 63935 |

|              |      |      |       |      |      |                                                                                                      |       |
|--------------|------|------|-------|------|------|------------------------------------------------------------------------------------------------------|-------|
| A_23_P210623 | -1.4 | 1.2  | -10.9 | -1.2 | PCK1 | Homo sapiens phosphoenolpyruvate carboxylase 1 (soluble) (PCK1), mRNA [NM_002591]                    | 5105  |
| A_24_P23636  | 1.2  | -4.7 | -2.6  | -2.7 | PCLO | Homo sapiens piccolo (presynaptic cytomatrix protein) (PCLO), transcript variant 2, mRNA [NM_014510] | 27445 |
| A_23_P70983  | 1.1  | 1.3  | -2.3  | 1.1  | PCLO | Homo sapiens piccolo (presynaptic cytomatrix protein) (PCLO), transcript variant 2, mRNA [NM_014510] | 27445 |

|              |      |      |      |      |       |                                                                                                                       |       |
|--------------|------|------|------|------|-------|-----------------------------------------------------------------------------------------------------------------------|-------|
| A_24_P247902 | 3.1  | 2.7  | 3.0  | 1.3  | PCLO  | Homo sapiens piccolo (presynaptic cytomatrix protein) (PCLO), transcript variant 2, mRNA [NM_014510]                  | 27445 |
| A_24_P283320 | -2.0 | -2.7 | -2.2 | -3.3 | PCMT1 | Homo sapiens protein-L-isoaspartate (D-aspartate) O-methyltransferase (PCMT1), transcript variant 1, mRNA [NM_005389] | 5110  |
| A_24_P140827 | 1.0  | 1.0  | 1.0  | -2.3 | PCMT1 | Homo sapiens protein-L-isoaspartate (D-aspartate) O-methyltransferase (PCMT1), transcript variant 1, mRNA [NM_005389] | 5110  |

|              |      |      |      |      |        |                                                                                                                      |        |
|--------------|------|------|------|------|--------|----------------------------------------------------------------------------------------------------------------------|--------|
| A_32_P203500 | -1.7 | -1.2 | -5.9 | -3.1 | PCMTD1 | Homo sapiens protein-L-isoaspartate (D-aspartate) O-methyltransferase domain containing 1 (PCMTD1), mRNA [NM_052937] | 115294 |
| A_24_P110967 | 1.1  | -1.8 | -3.2 | 1.1  | PCMTD1 | Homo sapiens protein-L-isoaspartate (D-aspartate) O-methyltransferase domain containing 1 (PCMTD1), mRNA [NM_052937] | 115294 |

|              |     |     |     |     |        |                                                                                                                                     |       |
|--------------|-----|-----|-----|-----|--------|-------------------------------------------------------------------------------------------------------------------------------------|-------|
| A_24_P537188 | 8.2 | 3.4 | 2.1 | 5.3 | PCMTD2 | protein-L-isoaspartate (D-aspartate) O-methyltransferase domain containing 2<br>[Source:HGNC Symbol;Acc:15882]<br>[ENST00000299468] | 55251 |
| A_24_P876772 | 2.3 | 2.6 | 2.9 | 2.1 | PCMTD2 | protein-L-isoaspartate (D-aspartate) O-methyltransferase domain containing 2<br>[Source:HGNC Symbol;Acc:15882]<br>[ENST00000299468] | 55251 |
| A_23_P37311  | 2.4 | 2.5 | 2.4 | 1.4 | PCNX   | Homo sapiens pecanex homolog (Drosophila) (PCNX), mRNA<br>[NM_014982]                                                               | 22990 |

|              |      |      |      |      |        |                                                                                           |        |
|--------------|------|------|------|------|--------|-------------------------------------------------------------------------------------------|--------|
| A_24_P225189 | -2.8 | -1.0 | -2.5 | -1.1 | PCNXL2 | Homo sapiens pecanex-like 2 (Drosophila) (PCNXL2), transcript variant 1, mRNA [NM_014801] | 80003  |
| A_24_P924202 | 1.4  | 3.8  | 1.6  | -1.8 | PCNXL3 | Homo sapiens pecanex-like 3 (Drosophila) (PCNXL3), mRNA [NM_032223]                       | 399909 |
| A_24_P83961  | 1.0  | 1.3  | -3.8 | 1.2  | PCNXL3 | Homo sapiens pecanex-like 3 (Drosophila) (PCNXL3), mRNA [NM_032223]                       | 399909 |
| A_24_P399500 | 2.0  | 2.4  | 1.5  | 2.1  | PCP2   | Homo sapiens Purkinje cell protein 2 (PCP2), mRNA [NM_174895]                             | 126006 |

|              |      |      |      |      |        |                                                                                                            |        |
|--------------|------|------|------|------|--------|------------------------------------------------------------------------------------------------------------|--------|
| A_23_P109322 | -2.7 | -1.0 | -1.1 | -2.9 | PCP4   | Homo sapiens Purkinje cell protein 4 (PCP4), mRNA [NM_006198]                                              | 5121   |
| A_32_P214665 | 1.7  | 2.2  | -2.2 | 1.4  | PCP4L1 | Homo sapiens Purkinje cell protein 4 like 1 (PCP4L1), mRNA [NM_001102566]                                  | 654790 |
| A_24_P14731  | 2.3  | -1.7 | -1.7 | -1.5 | PCSK1N | Homo sapiens proprotein convertase subtilisin/kexin type 1 inhibitor (PCSK1N), mRNA [NM_013271]            | 27344  |
| A_23_P79968  | -2.4 | -1.1 | -1.1 | -1.0 | PCSK2  | Homo sapiens proprotein convertase subtilisin/kexin type 2 (PCSK2), transcript variant 1, mRNA [NM_002594] | 5126   |

|              |      |      |      |      |       |                                                                                               |       |
|--------------|------|------|------|------|-------|-----------------------------------------------------------------------------------------------|-------|
| A_23_P16648  | -2.3 | -1.3 | -1.1 | -1.1 | PCSK4 | Homo sapiens proprotein convertase subtilisin/kexin type 4 (PCSK4), mRNA [NM_017573]          | 54760 |
| A_24_P355246 | -1.1 | 1.2  | -4.9 | -2.1 | PCSK5 | proprotein convertase subtilisin/kexin type 5 [Source:HGNC Symbol;Acc:8747] [ENST00000376752] | 5125  |
| A_32_P66974  | -1.3 | -1.5 | -1.5 | -5.3 | PCSK7 | Homo sapiens proprotein convertase subtilisin/kexin type 7 (PCSK7), mRNA [NM_004716]          | 9159  |



|              |      |      |      |      |        |                                                                                               |       |
|--------------|------|------|------|------|--------|-----------------------------------------------------------------------------------------------|-------|
| A_23_P203095 | 1.9  | -7.1 | 1.3  | 1.0  | PCSK7  | Homo sapiens proprotein convertase subtilisin/kexin type 7 (PCSK7), mRNA [NM_004716]          | 9159  |
| A_23_P64214  | -2.0 | -1.5 | -2.4 | -1.1 | PCSK7  | Homo sapiens proprotein convertase subtilisin/kexin type 7 (PCSK7), mRNA [NM_004716]          | 9159  |
| A_24_P398370 | -2.0 | -1.8 | -2.6 | 1.0  | PCSK7  | proprotein convertase subtilisin/kexin type 7 [Source:HGNC Symbol;Acc:8748] [ENST00000320934] | 9159  |
| A_23_P56640  | 1.0  | -1.6 | -4.2 | -1.1 | PCYOX1 | Homo sapiens prenylcysteine oxidase 1 (PCYOX1), mRNA [NM_016297]                              | 51449 |

|              |      |      |      |      |         |                                                                                                             |       |
|--------------|------|------|------|------|---------|-------------------------------------------------------------------------------------------------------------|-------|
| A_23_P30275  | 2.0  | 1.1  | 1.2  | 1.0  | PCYOX1L | Homo sapiens prenylcysteine oxidase 1 like (PCYOX1L), mRNA [NM_024028]                                      | 78991 |
| A_23_P252681 | -2.2 | -1.6 | -2.8 | -2.2 | PCYT1A  | Homo sapiens phosphate cytidyltransferase 1, choline, alpha (PCYT1A), mRNA [NM_005017]                      | 5130  |
| A_23_P148422 | -1.8 | -1.0 | -3.6 | -1.1 | PCYT1B  | Homo sapiens phosphate cytidyltransferase 1, choline, beta (PCYT1B), transcript variant 1, mRNA [NM_004845] | 9468  |

|              |      |      |      |      |       |                                                                                                           |       |
|--------------|------|------|------|------|-------|-----------------------------------------------------------------------------------------------------------|-------|
| A_24_P404245 | 1.5  | 1.0  | 2.3  | 1.1  | PCYT2 | Homo sapiens phosphate cytidyltransferase 2, ethanolamine (PCYT2), transcript variant 2, mRNA [NM_002861] | 5833  |
| A_23_P123256 | -1.0 | -8.3 | -1.2 | -1.1 | PDAP1 | Homo sapiens PDGFA associated protein 1 (PDAP1), mRNA [NM_014891]                                         | 11333 |
| A_23_P23090  | -1.0 | -7.1 | -1.0 | -1.0 | PDC   | Homo sapiens phosducin (PDC), transcript variant 1, mRNA [NM_002597]                                      | 5132  |
| A_23_P136405 | 2.1  | 2.9  | 1.1  | 3.7  | PDCD1 | Homo sapiens programmed cell death 1 (PDCD1), mRNA [NM_005018]                                            | 5133  |

|              |      |      |      |      |        |                                                                                                                      |       |
|--------------|------|------|------|------|--------|----------------------------------------------------------------------------------------------------------------------|-------|
| A_23_P161257 | -2.3 | -2.0 | -2.1 | -2.3 | PDCD11 | programm<br>ed cell<br>death 11<br>[Source:H<br>GNC<br>Symbol;Ac<br>c:13408]<br>[ENST0000<br>0369797]                | 22984 |
| A_23_P145146 | 1.1  | -1.4 | 1.2  | 2.6  | PDCD2  | Homo<br>sapiens<br>programm<br>ed cell<br>death 2<br>(PDCD2),<br>transcript<br>variant 1,<br>mRNA<br>[NM_0025<br>98] | 5134  |
| A_23_P27947  | 1.1  | -2.0 | -1.1 | -1.0 | PDCD2L | Homo<br>sapiens<br>programm<br>ed cell<br>death 2-<br>like<br>(PDCD2L),<br>mRNA<br>[NM_0323<br>46]                   | 84306 |
| A_24_P339611 | -1.3 | -1.5 | -4.1 | -3.3 | PDCD5  | Homo<br>sapiens<br>programm<br>ed cell<br>death 5<br>(PDCD5),<br>mRNA<br>[NM_0047<br>08]                             | 9141  |

|              |      |      |      |      |         |                                                                                                            |        |
|--------------|------|------|------|------|---------|------------------------------------------------------------------------------------------------------------|--------|
| A_32_P22338  | -2.4 | -3.2 | -1.1 | -1.1 | PDCD6IP | Homo sapiens programmed cell death 6 interacting protein (PDCD6IP), transcript variant 1, mRNA [NM_013374] | 10015  |
| A_32_P157531 | -1.3 | -2.4 | -6.3 | -1.2 | PDCL3   | Homo sapiens phosphocyanin-like 3 (PDCL3), mRNA [NM_024065]                                                | 79031  |
| A_23_P431543 | -1.5 | 1.1  | -1.8 | -2.0 | PDDC1   | Homo sapiens Parkinson disease 7 domain containing 1 (PDDC1), mRNA [NM_182612]                             | 347862 |
| A_23_P359904 | -4.5 | 1.8  | 2.5  | -1.1 | PDDC1   | Homo sapiens Parkinson disease 7 domain containing 1 (PDDC1), mRNA [NM_182612]                             | 347862 |

|              |      |      |      |      |        |                                                                                            |        |
|--------------|------|------|------|------|--------|--------------------------------------------------------------------------------------------|--------|
| A_23_P394367 | -1.4 | 1.1  | -3.6 | 1.2  | PDE11A | Homo sapiens phosphodiesterase 11A (PDE11A), transcript variant 4, mRNA [NM_016953]        | 50940  |
| A_24_P43144  | 2.1  | 2.7  | -1.1 | 1.5  | PDE11A | Homo sapiens phosphodiesterase 11A (PDE11A), transcript variant 2, mRNA [NM_001077358]     | 50940  |
| A_24_P230708 | 1.3  | 1.7  | 1.4  | 3.5  | PDE12  | Homo sapiens phosphodiesterase 12 (PDE12), mRNA [NM_177966]                                | 201626 |
| A_24_P102082 | -1.5 | -2.9 | -1.7 | -1.8 | PDE1A  | phosphodiesterase 1A, calmodulin-dependent [Source:HGNC Symbol;Acc:8774] [ENST00000409365] | 5136   |

|              |      |      |      |      |       |                                                                                                         |      |
|--------------|------|------|------|------|-------|---------------------------------------------------------------------------------------------------------|------|
| A_23_P139585 | 1.4  | -2.1 | -4.2 | -1.7 | PDE1B | Homo sapiens phosphodiesterase 1B, calmodulin-dependent (PDE1B), transcript variant 1, mRNA [NM_000924] | 5153 |
| A_23_P87379  | -6.2 | -1.5 | -1.6 | -1.5 | PDE2A | Homo sapiens phosphodiesterase 2A, cGMP-stimulated (PDE2A), transcript variant 1, mRNA [NM_002599]      | 5138 |
| A_23_P116114 | 2.4  | 1.2  | 3.1  | 2.4  | PDE3B | Homo sapiens phosphodiesterase 3B, cGMP-inhibited (PDE3B), mRNA [NM_000922]                             | 5140 |

|              |      |       |      |      |       |                                                                                                     |      |
|--------------|------|-------|------|------|-------|-----------------------------------------------------------------------------------------------------|------|
| A_23_P208334 | -1.0 | -1.0  | -2.5 | 1.2  | PDE4A | Homo sapiens phosphodiesterase 4A, cAMP-specific (PDE4A), transcript variant 4, mRNA [NM_006202]    | 5141 |
| A_24_P322474 | 2.1  | 2.1   | 2.0  | 1.6  | PDE4A | Homo sapiens phosphodiesterase 4A, cAMP-specific (PDE4A), transcript variant 4, mRNA [NM_006202]    | 5141 |
| A_23_P74278  | -2.2 | -3.8  | -1.8 | -1.0 | PDE4B | Homo sapiens phosphodiesterase 4B, cAMP-specific (PDE4B), transcript variant d, mRNA [NM_001037341] | 5142 |
| A_24_P921129 | -1.0 | -11.3 | -1.1 | -1.1 | PDE4B | Homo sapiens phosphodiesterase 4B, cAMP-specific (PDE4B), transcript variant b, mRNA [NM_001037339] | 5142 |



|              |       |      |      |      |       |                                                                                                  |      |
|--------------|-------|------|------|------|-------|--------------------------------------------------------------------------------------------------|------|
| A_24_P139120 | 2.5   | 3.4  | 2.4  | 2.0  | PDE4C | Homo sapiens phosphodiesterase 4C, cAMP-specific (PDE4C), transcript variant 1, mRNA [NM_000923] | 5143 |
| A_24_P419351 | -3.8  | 1.0  | -1.0 | -1.0 | PDE4D | Homo sapiens phosphodiesterase 4D, cAMP-specific (PDE4D), transcript variant 2, mRNA [NM_006203] | 5144 |
| A_24_P944519 | -3.1  | -1.9 | -6.2 | -1.9 | PDE4D | Homo sapiens phosphodiesterase 4D, cAMP-specific (PDE4D), transcript variant 2, mRNA [NM_006203] | 5144 |
| A_23_P124456 | -11.0 | -1.1 | -1.1 | -1.1 | PDE4D | Homo sapiens phosphodiesterase 4D, cAMP-specific (PDE4D), transcript variant 2, mRNA [NM_006203] | 5144 |

|              |       |      |      |      |         |                                                                                                             |      |
|--------------|-------|------|------|------|---------|-------------------------------------------------------------------------------------------------------------|------|
| A_23_P149153 | -1.0  | -1.0 | 1.1  | -5.7 | PDE4DIP | Homo sapiens phosphodiesterase 4D interacting protein (PDE4DIP), transcript variant 3, mRNA [NM_022359]     | 9659 |
| A_32_P44840  | -16.9 | 1.0  | -1.5 | -1.0 | PDE4DIP | Homo sapiens mRNA, similar to rat myomegalin, complete cds. [AB042555]                                      | 9659 |
| A_23_P22143  | -2.9  | 1.1  | 1.1  | 1.1  | PDE6B   | Homo sapiens phosphodiesterase 6B, cGMP-specific, rod, beta (PDE6B), transcript variant 1, mRNA [NM_000283] | 5158 |

|              |      |      |      |      |       |                                                                                                              |      |
|--------------|------|------|------|------|-------|--------------------------------------------------------------------------------------------------------------|------|
| A_23_P98070  | -2.0 | 1.0  | -1.0 | -2.4 | PDE6C | Homo sapiens phosphodiesterase 6C, cGMP-specific, cone, alpha prime (PDE6C), mRNA [NM_006204]                | 5146 |
| A_23_P95788  | 1.0  | -6.8 | 1.1  | -1.0 | PDE6G | Homo sapiens phosphodiesterase 6G, cGMP-specific, rod, gamma (PDE6G), transcript variant 1, mRNA [NM_002602] | 5148 |
| A_23_P123478 | 2.0  | 2.9  | 2.1  | 2.8  | PDE7A | Homo sapiens phosphodiesterase 7A (PDE7A), transcript variant 1, mRNA [NM_002603]                            | 5150 |

|              |      |      |      |      |       |                                                                                                              |       |
|--------------|------|------|------|------|-------|--------------------------------------------------------------------------------------------------------------|-------|
| A_23_P394154 | -5.5 | -4.8 | -1.0 | -1.0 | PDE8A | Homo sapiens phosphodiesterase 8A (PDE8A), transcript variant 1, mRNA [NM_002605]                            | 5151  |
| A_24_P339944 | -1.8 | -1.9 | -4.1 | -6.0 | PDGFB | Homo sapiens platelet-derived growth factor beta polypeptide (PDGFB), transcript variant 1, mRNA [NM_002608] | 5155  |
| A_24_P124349 | 1.8  | -2.6 | 1.7  | 2.0  | PDGFD | Homo sapiens platelet derived growth factor D (PDGFD), transcript variant 1, mRNA [NM_025208]                | 80310 |

|              |      |      |      |      |        |                                                                                                    |       |
|--------------|------|------|------|------|--------|----------------------------------------------------------------------------------------------------|-------|
| A_23_P300033 | -8.5 | 3.4  | 3.6  | 1.0  | PDGFRA | Homo sapiens platelet-derived growth factor receptor, alpha polypeptide (PDGFRA), mRNA [NM_006206] | 5156  |
| A_23_P81018  | -4.2 | 1.0  | 1.0  | 1.2  | PDHA2  | Homo sapiens pyruvate dehydrogenase (lipoamide) alpha 2 (PDHA2), mRNA [NM_005390]                  | 5161  |
| A_23_P325642 | 1.0  | -1.0 | -7.3 | -1.0 | PDIA2  | Homo sapiens protein disulfide isomerase family A, member 2 (PDIA2), mRNA [NM_006849]              | 64714 |
| A_32_P63182  | -8.6 | -1.4 | -1.4 | -2.4 | PDIA3  | Homo sapiens protein disulfide isomerase family A, member 3 (PDIA3), mRNA [NM_005313]              | 2923  |

|              |      |      |      |      |       |                                                                                                                                                   |      |
|--------------|------|------|------|------|-------|---------------------------------------------------------------------------------------------------------------------------------------------------|------|
| A_23_P42802  | -5.9 | 1.4  | -4.2 | -1.8 | PDIA4 | Homo sapiens protein disulfide isomerase family A, member 4 (PDIA4), mRNA [NM_004911]                                                             | 9601 |
| A_23_P10614  | 1.5  | 2.1  | 2.1  | 1.6  | PDK1  | Homo sapiens pyruvate dehydrogenase kinase, isozyme 1 (PDK1), nuclear gene encoding mitochondrial protein, mRNA [NM_002610]                       | 5163 |
| A_23_P207517 | -2.4 | -2.3 | 1.4  | -1.6 | PDK2  | Homo sapiens pyruvate dehydrogenase kinase, isozyme 2 (PDK2), nuclear gene encoding mitochondrial protein, transcript variant 1, mRNA [NM_002611] | 5164 |

|              |      |      |      |      |        |                                                                                                                                                      |      |
|--------------|------|------|------|------|--------|------------------------------------------------------------------------------------------------------------------------------------------------------|------|
| A_24_P941666 | -1.3 | -2.5 | -1.4 | -2.1 | PDK3   | Homo sapiens pyruvate dehydrogenase kinase, isozyme 3 (PDK3), nuclear gene encoding mitochondrial protein, transcript variant 1, mRNA [NM_001142386] | 5165 |
| A_24_P340112 | -1.0 | -5.5 | -1.2 | -2.8 | PDK3   | Homo sapiens pyruvate dehydrogenase kinase, isozyme 3 (PDK3), nuclear gene encoding mitochondrial protein, transcript variant 1, mRNA [NM_001142386] | 5165 |
| A_23_P149992 | -2.2 | 1.3  | 1.2  | -1.9 | PDLIM1 | Homo sapiens PDZ and LIM domain 1 (PDLIM1), mRNA [NM_020992]                                                                                         | 9124 |

|              |      |      |       |      |        |                                                                                               |       |
|--------------|------|------|-------|------|--------|-----------------------------------------------------------------------------------------------|-------|
| A_23_P20285  | 2.4  | 2.3  | 2.5   | -1.1 | PDLIM2 | Homo sapiens PDZ and LIM domain 2 (mystique) (PDLIM2), transcript variant 2, mRNA [NM_021630] | 64236 |
| A_23_P144796 | -1.2 | 1.2  | -2.1  | 2.1  | PDLIM4 | Homo sapiens PDZ and LIM domain 4 (PDLIM4), transcript variant 1, mRNA [NM_003687]            | 8572  |
| A_24_P24263  | -1.5 | 2.0  | 1.8   | -3.5 | PDLIM5 | Homo sapiens PDZ and LIM domain 5 (PDLIM5), transcript variant 4, mRNA [NM_001011515]         | 10611 |
| A_24_P174641 | -1.0 | -1.0 | -27.9 | -1.1 | PDLIM5 | Homo sapiens PDZ and LIM domain 5 (PDLIM5), transcript variant 1, mRNA [NM_006457]            | 10611 |



|              |      |      |      |      |        |                                                                                                            |       |
|--------------|------|------|------|------|--------|------------------------------------------------------------------------------------------------------------|-------|
| A_24_P41882  | -2.7 | -1.8 | -3.5 | -1.8 | PDLIM7 | Homo sapiens PDZ and LIM domain 7 (enigma) (PDLIM7), transcript variant 4, mRNA [NM_213636]                | 9260  |
| A_23_P144896 | 6.0  | 4.5  | 2.2  | -1.7 | PDLIM7 | Homo sapiens PDZ and LIM domain 7 (enigma) (PDLIM7), transcript variant 1, mRNA [NM_005451]                | 9260  |
| A_23_P66219  | 1.5  | -3.1 | -1.9 | -1.3 | PDPK1  | Homo sapiens 3-phosphoinositide dependent protein kinase-1 (PDPK1), transcript variant 1, mRNA [NM_002613] | 5170  |
| A_23_P430068 | -4.7 | -3.0 | -1.1 | 1.5  | PDPN   | Homo sapiens podoplanin (PDPN), transcript variant 1, mRNA [NM_006474]                                     | 10630 |

|              |      |      |      |      |       |                                                                                                                                    |       |
|--------------|------|------|------|------|-------|------------------------------------------------------------------------------------------------------------------------------------|-------|
| A_23_P166159 | -1.1 | -1.6 | -1.7 | -2.1 | PDRG1 | Homo sapiens p53 and DNA-damage regulated 1 (PDRG1), mRNA [NM_030815]                                                              | 81572 |
| A_24_P186216 | 1.1  | -3.4 | 1.0  | -1.6 | PDS5A | Homo sapiens PDS5, regulator of cohesion maintenance, homolog A (S. cerevisiae) (PDS5A), transcript variant 3, mRNA [NM_001100400] | 23244 |
| A_24_P52004  | 6.6  | 1.8  | 3.5  | 2.4  | PDS5A | Homo sapiens PDS5, regulator of cohesion maintenance, homolog A (S. cerevisiae) (PDS5A), transcript variant 1, mRNA [NM_001100399] | 23244 |

|              |      |      |      |      |       |                                                                                                           |       |
|--------------|------|------|------|------|-------|-----------------------------------------------------------------------------------------------------------|-------|
| A_23_P48387  | 1.6  | 3.6  | 1.4  | 1.3  | PDS5B | Homo sapiens PDS5, regulator of cohesion maintenance, homolog B (S. cerevisiae) (PDS5B), mRNA [NM_015032] | 23047 |
| A_23_P205098 | 2.3  | -1.0 | -1.1 | -1.1 | PDS5B | Homo sapiens PDS5, regulator of cohesion maintenance, homolog B (S. cerevisiae) (PDS5B), mRNA [NM_015032] | 23047 |
| A_23_P161152 | -4.9 | -2.0 | -2.1 | -1.4 | PDSS1 | Homo sapiens prenyl (decaprenyl) diphosphate synthase, subunit 1 (PDSS1), mRNA [NM_014317]                | 23590 |

|              |      |      |     |      |       |                                                                                      |       |
|--------------|------|------|-----|------|-------|--------------------------------------------------------------------------------------|-------|
| A_24_P160088 | 1.4  | -1.6 | 1.3 | -2.1 | PDXK  | Homo sapiens pyridoxal (pyridoxine, vitamin B6) kinase (PDXK), mRNA [NM_003681]      | 8566  |
| A_24_P65949  | 4.6  | 5.0  | 3.7 | 1.4  | PDXK  | Homo sapiens cDNA FLJ37311 fis, clone BRAMY2016771. [AK094630]                       | 8566  |
| A_24_P280029 | -3.3 | 1.9  | 1.8 | 1.0  | PDXP  | Homo sapiens pyridoxal (pyridoxine, vitamin B6) phosphatase (PDXP), mRNA [NM_020315] | 57026 |
| A_23_P7402   | 2.4  | -1.9 | 1.2 | 1.1  | PDZD2 | Homo sapiens PDZ domain containing 2 (PDZD2), mRNA [NM_178140]                       | 23037 |

|              |      |      |      |      |       |                                                                                         |        |
|--------------|------|------|------|------|-------|-----------------------------------------------------------------------------------------|--------|
| A_23_P24577  | 1.3  | 2.0  | 1.7  | 1.1  | PDZD3 | PDZ domain containing 3<br>[Source:HGNC Symbol;Acc:19891]<br>[ENST00000529098]          | 79849  |
| A_24_P265088 | 1.0  | -1.9 | -2.0 | -1.7 | PDZD4 | Homo sapiens PDZ domain containing 4 (PDZD4), mRNA<br>[NM_032512]                       | 57595  |
| A_23_P75088  | -5.5 | -3.1 | -1.3 | 1.1  | PDZD7 | Homo sapiens PDZ domain containing 7 (PDZD7), transcript variant 2, mRNA<br>[NM_024895] | 79955  |
| A_24_P47211  | 1.0  | -2.1 | 1.0  | -1.0 | PDZD8 | PDZ domain containing 8<br>[Source:HGNC Symbol;Acc:26974]<br>[ENST00000334464]          | 118987 |

|              |      |      |      |      |        |                                                                                                   |       |
|--------------|------|------|------|------|--------|---------------------------------------------------------------------------------------------------|-------|
| A_23_P415154 | 1.1  | -3.3 | -1.1 | -1.0 | PDZRN4 | Homo sapiens PDZ domain containing ring finger 4 (PDZRN4), transcript variant 2, mRNA [NM_013377] | 29951 |
| A_23_P105651 | 2.4  | -1.8 | 2.1  | -1.0 | PDZRN4 | Homo sapiens PDZ domain containing ring finger 4 (PDZRN4), transcript variant 2, mRNA [NM_013377] | 29951 |
| A_24_P410952 | -1.3 | -2.4 | 1.0  | -2.0 | PEA15  | Homo sapiens phosphoprotein enriched in astrocytes 15 (PEA15), mRNA [NM_003768]                   | 8682  |

|              |      |      |      |      |       |                                                                                               |        |
|--------------|------|------|------|------|-------|-----------------------------------------------------------------------------------------------|--------|
| A_24_P323901 | 6.9  | 9.5  | 7.8  | 2.6  | PEAR1 | Homo sapiens platelet endothelial aggregation receptor 1 (PEAR1), mRNA [NM_001080471]         | 375033 |
| A_24_P385326 | -1.9 | 1.5  | -3.2 | 1.6  | PEAR1 | Homo sapiens platelet endothelial aggregation receptor 1 (PEAR1), mRNA [NM_001080471]         | 375033 |
| A_23_P13604  | -3.0 | 1.8  | 1.7  | 1.0  | PEBP1 | Homo sapiens phosphatidylethanolamine binding protein 1 (PEBP1), mRNA [NM_002567]             | 5037   |
| A_23_P313    | -2.0 | -2.1 | -2.0 | -2.0 | PEF1  | Homo sapiens penta-EF-hand domain containing 1 (PEF1), transcript variant 1, mRNA [NM_012392] | 553115 |

|              |      |      |      |      |       |                                                                                                                                                       |        |
|--------------|------|------|------|------|-------|-------------------------------------------------------------------------------------------------------------------------------------------------------|--------|
| A_23_P104692 | -1.2 | 1.5  | -2.1 | -1.0 | PELI3 | Homo sapiens pellino homolog 3 (Drosophila) (PELI3), transcript variant 1, mRNA [NM_145065]                                                           | 246330 |
| A_24_P66239  | 2.0  | -1.5 | 1.9  | 1.4  | PELO  | Homo sapiens PRO1770 mRNA, complete cds. [AF118075]                                                                                                   | 53918  |
| A_23_P163955 | 1.6  | 2.3  | -1.2 | -1.1 | PEMT  | Homo sapiens phosphatidylethanolamine N-methyltransferase (PEMT), nuclear gene encoding mitochondrial protein, transcript variant 2, mRNA [NM_007169] | 10400  |



|              |       |      |      |      |      |                                                                                                                      |       |
|--------------|-------|------|------|------|------|----------------------------------------------------------------------------------------------------------------------|-------|
| A_23_P89589  | -1.1  | -1.5 | -2.3 | -3.3 | PER1 | Homo sapiens period homolog 1 (Drosophila) (PER1), mRNA [NM_002616]                                                  | 5187  |
| A_23_P411162 | -11.1 | 1.1  | 1.4  | 1.1  | PER2 | Homo sapiens period homolog 2 (Drosophila) (PER2), mRNA [NM_022817]                                                  | 8864  |
| A_23_P334555 | 1.1   | -4.0 | -1.4 | -1.2 | PES1 | Homo sapiens pescadillo homolog 1, containing BRCT domain (zebrafish) (PES1), transcript variant 1, mRNA [NM_014303] | 23481 |
| A_23_P20045  | -5.9  | -1.9 | -8.5 | -2.1 | PEX1 | Homo sapiens peroxisomal biogenesis factor 1 (PEX1), mRNA [NM_000466]                                                | 5189  |

|              |       |      |      |      |        |                                                                                               |       |
|--------------|-------|------|------|------|--------|-----------------------------------------------------------------------------------------------|-------|
| A_23_P501745 | -10.5 | 1.4  | -1.2 | -1.1 | PEX10  | Homo sapiens peroxisomal biogenesis factor 10 (PEX10), transcript variant 1, mRNA [NM_153818] | 5192  |
| A_24_P173727 | 1.4   | 2.8  | 1.3  | -1.2 | PEX10  | Homo sapiens peroxisomal biogenesis factor 10 (PEX10), transcript variant 2, mRNA [NM_002617] | 5192  |
| A_23_P321466 | 4.7   | 2.8  | 3.3  | -2.0 | PEX11G | Homo sapiens peroxisomal biogenesis factor 11 gamma (PEX11G), mRNA [NM_080662]                | 92960 |
| A_23_P257131 | -1.2  | -1.0 | -1.1 | 2.1  | PEX13  | Homo sapiens peroxisomal biogenesis factor 13 (PEX13), mRNA [NM_002618]                       | 5194  |

|              |      |      |       |      |           |                                                                                               |           |
|--------------|------|------|-------|------|-----------|-----------------------------------------------------------------------------------------------|-----------|
| A_23_P160188 | -2.2 | -1.1 | -13.3 | -1.2 | PEX19     | Homo sapiens peroxisomal biogenesis factor 19 (PEX19), transcript variant 1, mRNA [NM_002857] | 5824      |
| A_32_P222374 | -2.5 | 1.3  | 1.4   | 1.1  | PEX5L-AS2 | PREDICTED: Homo sapiens hypothetical LOC100505598 (LOC100505598), miscRNA [XR_108517]         | 100505598 |
| A_32_P41127  | -4.8 | 1.3  | -2.0  | 1.1  | PFDN1     | Homo sapiens prefoldin subunit 1 (PFDN1), mRNA [NM_002622]                                    | 5201      |
| A_23_P51906  | -2.2 | -1.7 | -2.7  | -1.5 | PFDN2     | Homo sapiens prefoldin subunit 2 (PFDN2), mRNA [NM_012394]                                    | 5202      |

|              |     |      |      |      |        |                                                                                                                     |      |
|--------------|-----|------|------|------|--------|---------------------------------------------------------------------------------------------------------------------|------|
| A_24_P203106 | 9.1 | 6.8  | 4.2  | 4.7  | PFKFB1 | Homo sapiens 6-phosphofructo-2-kinase/fructose-2,6-biphosphatase 1 (PFKFB1), mRNA [NM_002625]                       | 5207 |
| A_23_P201508 | 2.0 | 1.4  | 1.6  | 1.5  | PFKFB2 | Homo sapiens 6-phosphofructo-2-kinase/fructose-2,6-biphosphatase 2 (PFKFB2), transcript variant 1, mRNA [NM_006212] | 5208 |
| A_24_P111096 | 1.0 | -1.7 | -1.1 | -2.0 | PFKFB3 | Homo sapiens 6-phosphofructo-2-kinase/fructose-2,6-biphosphatase 3 (PFKFB3), transcript variant 1, mRNA [NM_004566] | 5209 |

|              |      |      |      |      |        |                                                                                                                     |      |
|--------------|------|------|------|------|--------|---------------------------------------------------------------------------------------------------------------------|------|
| A_24_P206604 | -1.8 | -2.4 | -3.6 | -2.0 | PFKFB3 | Homo sapiens 6-phosphofructo-2-kinase/fructose-2,6-biphosphatase 3 (PFKFB3), transcript variant 1, mRNA [NM_004566] | 5209 |
| A_23_P29081  | -1.8 | 1.5  | 1.7  | 2.1  | PFKL   | Homo sapiens phosphofructokinase, liver (PFKL), transcript variant 2, mRNA [NM_002626]                              | 5211 |
| A_23_P29079  | 1.7  | 1.1  | 1.0  | 3.0  | PFKL   | Homo sapiens phosphofructokinase, liver (PFKL), transcript variant 2, mRNA [NM_002626]                              | 5211 |
| A_23_P46928  | 1.0  | 2.0  | -1.1 | 1.2  | PFKP   | Homo sapiens phosphofructokinase, platelet (PFKP), transcript variant 1, mRNA [NM_002627]                           | 5214 |

|              |      |      |      |      |      |                                                                               |        |
|--------------|------|------|------|------|------|-------------------------------------------------------------------------------|--------|
| A_23_P27096  | -2.0 | 1.1  | -2.2 | 1.2  | PFN1 | Homo sapiens profilin 1 (PFN1), mRNA [NM_005022]                              | 5216   |
| A_32_P234604 | -2.2 | -1.0 | -2.4 | 1.2  | PFN1 | Homo sapiens profilin 1 (PFN1), mRNA [NM_005022]                              | 5216   |
| A_23_P253301 | -2.2 | 2.4  | 2.3  | 2.5  | PFN2 | Homo sapiens profilin 2 (PFN2), transcript variant 1, mRNA [NM_053024]        | 5217   |
| A_23_P150547 | 9.1  | 6.5  | 4.7  | 5.7  | PGA3 | Homo sapiens pepsinogen 3, group I (pepsinogen A) (PGA3), mRNA [NM_001079807] | 643834 |
| A_23_P150549 | 1.0  | -2.3 | 2.1  | -1.0 | PGA3 | Homo sapiens pepsinogen 3, group I (pepsinogen A) (PGA3), mRNA [NM_001079807] | 643834 |

|              |      |      |      |      |       |                                                                                                                                                   |        |
|--------------|------|------|------|------|-------|---------------------------------------------------------------------------------------------------------------------------------------------------|--------|
| A_23_P93940  | -2.4 | 1.8  | -1.9 | -7.4 | PGAM2 | Homo sapiens phosphoglycerate mutase 2 (muscle) (PGAM2), mRNA [NM_000290]                                                                         | 5224   |
| A_23_P319719 | -1.5 | -2.2 | -2.2 | 1.3  | PGAM5 | Homo sapiens phosphoglycerate mutase family member 5 (PGAM5), nuclear gene encoding mitochondrial protein, transcript variant 3, mRNA [NM_138575] | 192111 |
| A_23_P79247  | -1.5 | 2.4  | 2.3  | -2.7 | PGAP1 | Homo sapiens post-GPI attachment to proteins 1 (PGAP1), mRNA [NM_024989]                                                                          | 80055  |

|              |      |      |      |      |       |                                                                                         |        |
|--------------|------|------|------|------|-------|-----------------------------------------------------------------------------------------|--------|
| A_24_P275828 | -1.9 | -2.2 | -2.1 | -2.1 | PGAP3 | Homo sapiens post-GPI attachment to proteins 3 (PGAP3), mRNA [NM_033419]                | 93210  |
| A_23_P319565 | 2.1  | 2.0  | 2.1  | 2.0  | PGBD3 | Homo sapiens piggyBac transposable element derived 3 (PGBD3), mRNA [NM_170753]          | 267004 |
| A_23_P7961   | 2.3  | -1.2 | 1.2  | -1.4 | PGC   | Homo sapiens progastricsin (pepsinogen C) (PGC), transcript variant 1, mRNA [NM_002630] | 5225   |
| A_23_P76992  | -3.0 | 1.9  | -1.8 | -2.3 | PGF   | Homo sapiens placental growth factor (PGF), transcript variant 1, mRNA [NM_002632]      | 5228   |



|              |      |      |      |      |      |                                                                                                                    |       |
|--------------|------|------|------|------|------|--------------------------------------------------------------------------------------------------------------------|-------|
| A_24_P254532 | -1.1 | -4.3 | -1.2 | -1.2 | PGK1 | Homo sapiens phosphoglycerate kinase 1 (PGK1), mRNA [NM_000291]                                                    | 5230  |
| A_24_P119774 | 1.1  | -6.6 | 1.0  | 1.1  | PGK1 | phosphoglycerate kinase 1 [Source:HGNC Symbol;Acc:8896] [ENST00000474281]                                          | 5230  |
| A_32_P14212  | 1.0  | -1.0 | -1.1 | -2.3 | PGK1 | phosphoglycerate kinase 1 [Source:HGNC Symbol;Acc:8896] [ENST00000373316]                                          | 5230  |
| A_24_P920994 | 1.2  | 1.6  | -1.3 | -2.4 | PGLS | Homo sapiens 6-phosphogluconolactonase, mRNA (cDNA clone IMAGE:4395142), with apparent retained intron. [BC017706] | 25796 |

|              |      |      |      |      |        |                                                                             |        |
|--------------|------|------|------|------|--------|-----------------------------------------------------------------------------|--------|
| A_23_P396765 | 1.0  | -4.2 | 1.0  | 1.0  | PGM2L1 | Homo sapiens phosphoglucosyltransferase 2-like 1 (PGM2L1), mRNA [NM_173582] | 283209 |
| A_32_P122703 | 1.5  | -3.2 | 1.0  | 1.2  | PGM2L1 | Homo sapiens phosphoglucosyltransferase 2-like 1 (PGM2L1), mRNA [NM_173582] | 283209 |
| A_23_P10956  | 1.1  | 1.1  | -1.0 | -4.0 | PGM5   | Homo sapiens phosphoglucosyltransferase 5 (PGM5), mRNA [NM_021965]          | 5239   |
| A_24_P254949 | 3.0  | 2.1  | 3.3  | 1.1  | PGM5   | Homo sapiens phosphoglucosyltransferase 5 (PGM5), mRNA [NM_021965]          | 5239   |
| A_24_P942805 | 21.0 | 5.1  | 9.0  | 6.5  | PGP    | Homo sapiens phosphoglycolate phosphatase (PGP), mRNA [NM_001042371]        | 283871 |

|              |      |      |      |     |        |                                                                                    |       |
|--------------|------|------|------|-----|--------|------------------------------------------------------------------------------------|-------|
| A_23_P22854  | 1.3  | 3.3  | 4.3  | 1.1 | PGPEP1 | Homo sapiens pyroglutamyl-peptidase I (PGPEP1), mRNA [NM_017712]                   | 54858 |
| A_23_P155868 | 2.6  | 1.5  | 1.7  | 1.1 | PGRMC2 | Homo sapiens progesterone receptor membrane component 2 (PGRMC2), mRNA [NM_006320] | 10424 |
| A_24_P940288 | -4.2 | -8.5 | -1.0 | 1.0 | PGS1   | Homo sapiens mRNA; cDNA DKFZp762M186 (from clone DKFZp762M186). [AL359590]         | 9489  |

|              |      |      |      |      |         |                                                                                                     |        |
|--------------|------|------|------|------|---------|-----------------------------------------------------------------------------------------------------|--------|
| A_32_P52018  | 1.0  | -3.8 | 1.1  | -1.6 | PHACTR1 | Homo sapiens phosphatase and actin regulator 1 (PHACTR1), transcript variant 1, mRNA [NM_030948]    | 221692 |
| A_32_P88626  | 2.4  | 3.1  | 3.5  | 2.1  | PHACTR4 | Homo sapiens phosphatase and actin regulator 4 (PHACTR4), transcript variant 1, mRNA [NM_001048183] | 65979  |
| A_23_P130040 | -1.1 | -4.3 | -1.1 | 1.2  | PHB     | Homo sapiens prohibitin (PHB), mRNA [NM_002634]                                                     | 5245   |
| A_24_P854199 | 2.5  | 1.2  | 2.4  | 4.3  | PHB     | Homo sapiens prohibitin (PHB), mRNA [NM_002634]                                                     | 5245   |

|              |     |      |     |      |      |                                                                                                 |       |
|--------------|-----|------|-----|------|------|-------------------------------------------------------------------------------------------------|-------|
| A_24_P265254 | 2.0 | 2.1  | 1.9 | 2.2  | PHC2 | Homo sapiens polyhomeotic homolog 2 (Drosophila) (PHC2), transcript variant 1, mRNA [NM_198040] | 1912  |
| A_23_P34510  | 1.2 | 1.1  | 1.6 | 2.3  | PHC2 | Homo sapiens polyhomeotic homolog 2 (Drosophila) (PHC2), transcript variant 1, mRNA [NM_198040] | 1912  |
| A_24_P179175 | 1.3 | -3.1 | 1.3 | -1.8 | PHC3 | polyhomeotic homolog 3 (Drosophila) [Source:HGNC Symbol;Acc:15682] [ENST00000474275]            | 80012 |

|              |       |     |      |      |       |                                                                                    |        |
|--------------|-------|-----|------|------|-------|------------------------------------------------------------------------------------|--------|
| A_23_P409988 | 4.9   | 5.5 | 5.5  | 1.0  | PHC3  | Homo sapiens polyhomeotic homolog 3 (Drosophila) (PHC3), mRNA [NM_024947]          | 80012  |
| A_23_P503200 | 7.3   | 6.0 | 1.6  | 1.6  | PHF10 | Homo sapiens PHD finger protein 10 (PHF10), transcript variant 1, mRNA [NM_018288] | 55274  |
| A_32_P58425  | -11.8 | 1.0 | 1.5  | -2.1 | PHF13 | Homo sapiens PHD finger protein 13 (PHF13), mRNA [NM_153812]                       | 148479 |
| A_23_P156198 | -17.4 | 1.0 | -1.2 | -1.2 | PHF15 | Homo sapiens PHD finger protein 15 (PHF15), mRNA [NM_015288]                       | 23338  |

|              |      |      |      |      |       |                                                                                       |       |
|--------------|------|------|------|------|-------|---------------------------------------------------------------------------------------|-------|
| A_23_P167256 | -1.4 | -3.6 | -1.0 | -1.0 | PHF17 | Homo sapiens PHD finger protein 17 (PHF17), transcript variant L, mRNA [NM_199320]    | 79960 |
| A_23_P410587 | -1.0 | -1.0 | -4.2 | -1.0 | PHF17 | Homo sapiens PHD finger protein 17 (PHF17), transcript variant S, mRNA [NM_024900]    | 79960 |
| A_23_P21436  | 1.8  | 2.0  | 1.9  | -1.1 | PHF19 | Homo sapiens PHD finger protein 19 (PHF19), transcript variant 1, mRNA [NM_015651]    | 26147 |
| A_23_P401904 | 2.0  | 1.6  | -1.4 | 1.6  | PHF19 | Homo sapiens PHD finger protein 19 (PHF19), transcript variant 2, mRNA [NM_001009936] | 26147 |

|              |      |      |      |      |         |                                                                                             |       |
|--------------|------|------|------|------|---------|---------------------------------------------------------------------------------------------|-------|
| A_23_P216038 | -1.6 | -1.7 | -1.8 | -2.7 | PHF20L1 | Homo sapiens PHD finger protein 20-like 1 (PHF20L1), transcript variant 2, mRNA [NM_032205] | 51105 |
| A_23_P202715 | -1.2 | -1.2 | -3.2 | -1.3 | PHF21A  | Homo sapiens PHD finger protein 21A (PHF21A), transcript variant 2, mRNA [NM_016621]        | 51317 |
| A_24_P5550   | -1.8 | -1.8 | -2.1 | -3.1 | PHF23   | Homo sapiens PHD finger protein 23 (PHF23), mRNA [NM_024297]                                | 79142 |
| A_23_P253571 | -8.2 | -1.1 | -1.2 | -1.2 | PHF5A   | Homo sapiens PHD finger protein 5A (PHF5A), mRNA [NM_032758]                                | 84844 |



|              |      |      |      |       |       |                                                                                      |       |
|--------------|------|------|------|-------|-------|--------------------------------------------------------------------------------------|-------|
| A_23_P171385 | 3.0  | 5.0  | 4.0  | 2.3   | PHF6  | Homo sapiens PHD finger protein 6 (PHF6), transcript variant 3, mRNA [NM_032335]     | 84295 |
| A_24_P942253 | -5.6 | -4.6 | -5.1 | -4.9  | PHF8  | Homo sapiens PHD finger protein 8 (PHF8), transcript variant 2, mRNA [NM_015107]     | 23133 |
| A_23_P85783  | 2.5  | 2.5  | 2.6  | -1.4  | PHGDH | Homo sapiens phosphoglycerate dehydrogenase (PHGDH), mRNA [NM_006623]                | 26227 |
| A_23_P145437 | 1.2  | 2.0  | 1.6  | -22.2 | PHIP  | Homo sapiens pleckstrin homology domain interacting protein (PHIP), mRNA [NM_017934] | 55023 |

|              |      |      |      |      |       |                                                                                                          |       |
|--------------|------|------|------|------|-------|----------------------------------------------------------------------------------------------------------|-------|
| A_32_P61339  | -2.4 | 1.0  | 1.0  | 1.0  | PHIP  | Homo sapiens pleckstrin homology domain interacting protein, mRNA (cDNA clone IMAGE:5260603). [BC036479] | 55023 |
| A_24_P931503 | -2.1 | -1.7 | -1.1 | -1.5 | PHIP  | Homo sapiens pleckstrin homology domain interacting protein (PHIP), mRNA [NM_017934]                     | 55023 |
| A_24_P238543 | -1.8 | -1.9 | -2.1 | -2.6 | PHKA1 | Homo sapiens phosphorylase kinase, alpha 1 (muscle) (PHKA1), transcript variant 1, mRNA [NM_002637]      | 5255  |

|              |      |      |      |     |        |                                                                                                     |       |
|--------------|------|------|------|-----|--------|-----------------------------------------------------------------------------------------------------|-------|
| A_23_P77682  | 2.9  | 1.5  | -1.4 | 2.2 | PHKG2  | Homo sapiens phosphorylase kinase, gamma 2 (testis) (PHKG2), transcript variant 1, mRNA [NM_000294] | 5261  |
| A_24_P943597 | 3.6  | 3.5  | 3.3  | 3.0 | PHLDA1 | Homo sapiens pleckstrin homology-like domain, family A, member 1 (PHLDA1), mRNA [NM_007350]         | 22822 |
| A_23_P338912 | -1.0 | -5.4 | 1.5  | 1.5 | PHLDA1 | Homo sapiens pleckstrin homology-like domain, family A, member 1 (PHLDA1), mRNA [NM_007350]         | 22822 |

|              |       |      |      |      |          |                                                                                                                   |        |
|--------------|-------|------|------|------|----------|-------------------------------------------------------------------------------------------------------------------|--------|
| A_24_P240166 | -53.1 | 1.1  | -1.0 | -1.0 | PHLDB2   | Homo sapiens pleckstrin homology-like domain, family B, member 2 (PHLDB2), transcript variant 4, mRNA [NM_145753] | 90102  |
| A_24_P935712 | 2.4   | 2.4  | 2.5  | 2.4  | PHLPP1   | Homo sapiens clone FLC0964 PRO2946 mRNA, complete cds. [AF130097]                                                 | 23239  |
| A_23_P49792  | 1.8   | 1.1  | 2.4  | -1.0 | PHOSPHO1 | Homo sapiens phosphatase, orphan 1 (PHOSPHO1), transcript variant 2, mRNA [NM_178500]                             | 162466 |
| A_23_P83192  | 1.1   | -2.4 | -1.8 | -3.2 | PHPT1    | Homo sapiens phosphohistidine phosphatase 1 (PHPT1), transcript variant 3, mRNA [NM_014172]                       | 29085  |

|              |       |      |      |      |        |                                                                                                             |        |
|--------------|-------|------|------|------|--------|-------------------------------------------------------------------------------------------------------------|--------|
| A_23_P201179 | -2.4  | -1.6 | -1.6 | -1.5 | PHTF1  | Homo sapiens mRNA for homeobox protein LSX. [AJ011863]                                                      | 10745  |
| A_32_P409919 | -11.0 | -1.7 | -1.0 | 1.0  | PHTF2  | Homo sapiens putative homeodomain transcription factor 2 (PHTF2), transcript variant 2, mRNA [NM_020432]    | 57157  |
| A_23_P72001  | -1.1  | -2.5 | -1.1 | -1.5 | PHYHD1 | Homo sapiens phytanoyl-CoA dioxygenase domain containing 1 (PHYHD1), transcript variant 2, mRNA [NM_174933] | 254295 |
| A_23_P71364  | 1.2   | 2.5  | 1.2  | 1.4  | PI15   | Homo sapiens peptidase inhibitor 15 (PI15), mRNA [NM_015886]                                                | 51050  |

|              |      |      |      |      |         |                                                                                                                 |        |
|--------------|------|------|------|------|---------|-----------------------------------------------------------------------------------------------------------------|--------|
| A_24_P300379 | -3.8 | -1.5 | 2.4  | 1.1  | PI16    | Homo sapiens peptidase inhibitor 16 (PI16), transcript variant 1, mRNA [NM_153370]                              | 221476 |
| A_23_P127339 | -1.6 | -1.4 | -3.2 | -1.2 | PI4K2A  | Homo sapiens phosphatidylinositol 4-kinase type 2 alpha (PI4K2A), mRNA [NM_018425]                              | 55361  |
| A_23_P18598  | -3.0 | -1.1 | -1.3 | -1.2 | PI4K2B  | Homo sapiens phosphatidylinositol 4-kinase type 2 beta (PI4K2B), mRNA [NM_018323]                               | 55300  |
| A_32_P507710 | 1.0  | 1.0  | -2.2 | -1.2 | PI4KAP2 | Homo sapiens phosphatidylinositol 4-kinase, catalytic, alpha pseudogene 2 (PI4KAP2), non-coding RNA [NR_003700] | 375133 |

|              |      |      |      |      |       |                                                                                                                |       |
|--------------|------|------|------|------|-------|----------------------------------------------------------------------------------------------------------------|-------|
| A_23_P103824 | -1.0 | -2.0 | 1.1  | 1.0  | PI4KB | Homo sapiens phosphatidylinositol 4-kinase, catalytic, beta (PI4KB), transcript variant 2, mRNA [NM_001198773] | 5298  |
| A_23_P163353 | -1.9 | -1.9 | -2.6 | -1.1 | PIAS1 | Homo sapiens protein inhibitor of activated STAT, 1 (PIAS1), mRNA [NM_016166]                                  | 8554  |
| A_23_P149678 | 1.8  | -1.0 | -3.3 | -3.1 | PIAS3 | Homo sapiens protein inhibitor of activated STAT, 3 (PIAS3), mRNA [NM_006099]                                  | 10401 |
| A_24_P6889   | -4.5 | -1.3 | -2.8 | -4.9 | PIAS3 | Homo sapiens protein inhibitor of activated STAT, 3 (PIAS3), mRNA [NM_006099]                                  | 10401 |

|              |      |      |      |      |        |                                                                                                                      |       |
|--------------|------|------|------|------|--------|----------------------------------------------------------------------------------------------------------------------|-------|
| A_23_P90280  | -1.7 | -2.0 | -1.6 | -3.3 | PIAS4  | Homo sapiens protein inhibitor of activated STAT, 4 (PIAS4), mRNA [NM_015897]                                        | 51588 |
| A_23_P411881 | -4.7 | 1.2  | 1.1  | -7.7 | PIBF1  | Homo sapiens progesterone immunomodulatory binding factor 1 (PIBF1), mRNA [NM_006346]                                | 10464 |
| A_23_P203658 | 1.1  | -2.2 | -1.2 | 3.2  | PICALM | Homo sapiens phosphatidylinositol binding clathrin assembly protein (PICALM), transcript variant 1, mRNA [NM_007166] | 8301  |



|              |      |     |     |     |        |                                                                                                                      |      |
|--------------|------|-----|-----|-----|--------|----------------------------------------------------------------------------------------------------------------------|------|
| A_23_P147995 | 2.8  | 4.2 | 2.8 | 4.4 | PICALM | Homo sapiens phosphatidylinositol binding clathrin assembly protein (PICALM), transcript variant 1, mRNA [NM_007166] | 8301 |
| A_23_P91727  | -3.9 | 1.8 | 2.0 | 1.5 | PICK1  | Homo sapiens protein interacting with PRKCA 1 (PICK1), transcript variant 1, mRNA [NM_012407]                        | 9463 |
| A_23_P140738 | 2.3  | 2.6 | 1.0 | 1.1 | PIEZO1 | Homo sapiens piezo-type mechanosensitive ion channel component 1 (PIEZO1), mRNA [NM_001142864]                       | 9780 |

|              |      |      |      |      |        |                                                                                             |       |
|--------------|------|------|------|------|--------|---------------------------------------------------------------------------------------------|-------|
| A_23_P130376 | 1.2  | 1.3  | -3.3 | -1.1 | PIEZO2 | Homo sapiens piezo-type mechanosensitive ion channel component 2 (PIEZO2), mRNA [NM_022068] | 63895 |
| A_24_P417831 | -1.9 | 1.3  | -1.1 | -3.8 | PIEZO2 | Homo sapiens piezo-type mechanosensitive ion channel component 2 (PIEZO2), mRNA [NM_022068] | 63895 |
| A_23_P323743 | 3.2  | -2.6 | -1.7 | 1.3  | PIF1   | Homo sapiens PIF1 5'-to-3' DNA helicase homolog (S. cerevisiae) (PIF1), mRNA [NM_025049]    | 80119 |

|             |      |       |      |      |      |                                                                                                                      |       |
|-------------|------|-------|------|------|------|----------------------------------------------------------------------------------------------------------------------|-------|
| A_23_P74852 | 1.6  | 1.4   | 2.6  | 1.6  | PIGC | phosphatidylinositol glycan anchor biosynthesis, class C [Source:HGNC Symbol;Acc:8960] [ENST00000484368]             | 5279  |
| A_23_P86252 | -1.0 | -2.1  | -8.9 | -2.6 | PIGC | Homo sapiens phosphatidylinositol glycan anchor biosynthesis, class C (PIGC), transcript variant 2, mRNA [NM_002642] | 5279  |
| A_23_P60240 | -1.0 | -21.0 | -1.2 | -1.1 | PIGO | Homo sapiens phosphatidylinositol glycan anchor biosynthesis, class O (PIGO), transcript variant 1, mRNA [NM_032634] | 84720 |

|              |      |      |      |      |      |                                                                                                                      |       |
|--------------|------|------|------|------|------|----------------------------------------------------------------------------------------------------------------------|-------|
| A_23_P79842  | -2.4 | 1.6  | 1.4  | 1.5  | PIGT | Homo sapiens phosphatidylinositol glycan anchor biosynthesis, class T (PIGT), transcript variant 1, mRNA [NM_015937] | 51604 |
| A_24_P944848 | 2.8  | 2.8  | 2.8  | 2.9  | PIGT | Homo sapiens PRO0433 mRNA, complete cds. [AF305815]                                                                  | 51604 |
| A_23_P46378  | -2.3 | -2.6 | -2.7 | -1.3 | PIGV | Homo sapiens phosphatidylinositol glycan anchor biosynthesis, class V (PIGV), transcript variant 2, mRNA [NM_017837] | 55650 |
| A_23_P143935 | -2.8 | 1.0  | 1.8  | 1.1  | PIGZ | Homo sapiens phosphatidylinositol glycan anchor biosynthesis, class Z (PIGZ), mRNA [NM_025163]                       | 80235 |

|              |      |       |      |     |         |                                                                                                 |      |
|--------------|------|-------|------|-----|---------|-------------------------------------------------------------------------------------------------|------|
| A_23_P36166  | -3.1 | -36.7 | -2.7 | 1.0 | PIK3C2A | Homo sapiens phosphoinositide-3-kinase, class 2, alpha polypeptide (PIK3C2A), mRNA [NM_002645]  | 5286 |
| A_24_P288116 | 1.1  | 1.1   | 1.7  | 3.8 | PIK3C3  | phosphoinositide-3-kinase, class 3 [Source:HGNC Symbol;Acc:8974] [ENST00000262039]              | 5289 |
| A_24_P71244  | -1.5 | -11.2 | -2.6 | 1.1 | PIK3CD  | Homo sapiens phosphoinositide-3-kinase, catalytic, delta polypeptide (PIK3CD), mRNA [NM_005026] | 5293 |

|              |       |      |      |      |        |                                                                                                                       |      |
|--------------|-------|------|------|------|--------|-----------------------------------------------------------------------------------------------------------------------|------|
| A_23_P251359 | -3.3  | 1.3  | -1.8 | -2.3 | PIK3CG | Homo sapiens phosphoinositide-3-kinase, catalytic, gamma polypeptide (PIK3CG), mRNA [NM_002649]                       | 5294 |
| A_23_P142361 | -15.6 | -1.0 | -1.5 | -1.0 | PIK3R2 | Homo sapiens phosphoinositide-3-kinase, regulatory subunit 2 (beta) (PIK3R2), mRNA [NM_005027]                        | 5296 |
| A_23_P22970  | -1.5  | 1.1  | -3.3 | -1.8 | PIK3R3 | Homo sapiens phosphoinositide-3-kinase, regulatory subunit 3 (gamma) (PIK3R3), transcript variant 1, mRNA [NM_003629] | 8503 |

|              |      |      |      |      |        |                                                                                                                       |       |
|--------------|------|------|------|------|--------|-----------------------------------------------------------------------------------------------------------------------|-------|
| A_24_P156781 | 1.0  | 3.8  | 1.0  | 1.6  | PIK3R3 | Homo sapiens phosphoinositide-3-kinase, regulatory subunit 3 (gamma) (PIK3R3), transcript variant 1, mRNA [NM_003629] | 8503  |
| A_24_P527274 | -1.0 | -1.2 | -2.1 | -1.6 | PIK3R3 | phosphoinositide-3-kinase, regulatory subunit 3 (gamma) [Source:HGNC Symbol;Acc:8981] [ENST00000540385]               | 8503  |
| A_23_P132526 | 3.2  | 1.7  | -3.3 | 1.5  | PIK3R4 | Homo sapiens phosphoinositide-3-kinase, regulatory subunit 4 (PIK3R4), mRNA [NM_014602]                               | 30849 |

|              |       |      |      |      |        |                                                                                                               |        |
|--------------|-------|------|------|------|--------|---------------------------------------------------------------------------------------------------------------|--------|
| A_23_P66543  | 1.8   | 1.2  | -1.1 | -4.7 | PIK3R5 | Homo sapiens phosphoinositide-3-kinase, regulatory subunit 5 (PIK3R5), transcript variant 2, mRNA [NM_014308] | 23533  |
| A_24_P366509 | -1.5  | 1.3  | -1.1 | 2.5  | PIK3R6 | Homo sapiens phosphoinositide-3-kinase, regulatory subunit 6 (PIK3R6), mRNA [NM_001010855]                    | 146850 |
| A_23_P31224  | -17.0 | -1.1 | -1.1 | -1.1 | PILRA  | Homo sapiens paired immunoglobulin-like type 2 receptor alpha (PILRA), transcript variant 3, mRNA [NM_178273] | 29992  |
| A_23_P345118 | 1.6   | 1.8  | 2.0  | 1.4  | PIM1   | Homo sapiens pim-1 oncogene (PIM1), transcript variant 1, mRNA [NM_002648]                                    | 5292   |



|              |     |     |      |     |        |                                                                                                                       |       |
|--------------|-----|-----|------|-----|--------|-----------------------------------------------------------------------------------------------------------------------|-------|
| A_24_P379104 | 1.9 | 2.3 | 1.8  | 1.6 | PIM2   | Homo sapiens pim-2 oncogene (PIM2), mRNA [NM_006875]                                                                  | 11040 |
| A_23_P67162  | 1.1 | 2.2 | -1.2 | 1.4 | PIN1   | Homo sapiens peptidylprolyl cis/trans isomerase, NIMA-interacting 1 (PIN1), transcript variant 1, mRNA [NM_006221]    | 5300  |
| A_24_P276493 | 1.6 | 1.2 | -2.0 | 2.1 | PIN1P1 | Homo sapiens peptidylprolyl cis/trans isomerase, NIMA-interacting 1 pseudogene 1 (PIN1P1), non-coding RNA [NR_023916] | 5301  |

|              |       |      |      |      |        |                                                                                                                       |       |
|--------------|-------|------|------|------|--------|-----------------------------------------------------------------------------------------------------------------------|-------|
| A_23_P266    | -3.9  | 1.2  | 1.1  | -1.7 | PIN1P1 | Homo sapiens peptidylprolyl cis/trans isomerase, NIMA-interacting 1 pseudogene 1 (PIN1P1), non-coding RNA [NR_023916] | 5301  |
| A_24_P235360 | -2.6  | 1.6  | 1.2  | 1.6  | PINX1  | PIN2/TERF1 interacting, telomerase inhibitor 1 [Source:HGNC Symbol;Acc:30046] [ENST00000426190]                       | 54984 |
| A_23_P8702   | -18.9 | -1.0 | -1.1 | -1.0 | PIP    | Homo sapiens prolactin-induced protein (PIP), mRNA [NM_002652]                                                        | 5304  |

|              |      |     |      |      |         |                                                                                                                          |       |
|--------------|------|-----|------|------|---------|--------------------------------------------------------------------------------------------------------------------------|-------|
| A_23_P407115 | 1.2  | 3.1 | 1.6  | 1.5  | PIP4K2B | Homo sapiens phosphatidylinositol-5-phosphate 4-kinase, type II, beta (PIP4K2B), mRNA [NM_003559]                        | 8396  |
| A_23_P162199 | -3.2 | 1.8 | -2.0 | -2.7 | PIP4K2C | Homo sapiens phosphatidylinositol-5-phosphate 4-kinase, type II, gamma (PIP4K2C), transcript variant 1, mRNA [NM_024779] | 79837 |
| A_23_P23572  | 1.6  | 1.3 | -2.6 | -1.5 | PIP5K1A | Homo sapiens phosphatidylinositol-4-phosphate 5-kinase, type I, alpha (PIP5K1A), transcript variant 2, mRNA [NM_003557]  | 8394  |

|              |       |     |      |     |         |                                                                                                                         |       |
|--------------|-------|-----|------|-----|---------|-------------------------------------------------------------------------------------------------------------------------|-------|
| A_23_P78952  | 1.6   | 2.6 | -1.5 | 1.0 | PIP5K1C | Homo sapiens phosphatidylinositol-4-phosphate 5-kinase, type I, gamma (PIP5K1C), transcript variant 2, mRNA [NM_012398] | 23396 |
| A_23_P330262 | -14.8 | 1.9 | -1.0 | 1.1 | PIP5K1C | Homo sapiens phosphatidylinositol-4-phosphate 5-kinase, type I, gamma (PIP5K1C), transcript variant 2, mRNA [NM_012398] | 23396 |
| A_23_P164258 | 1.8   | 2.7 | -1.5 | 1.9 | PIPOX   | Homo sapiens pipecolic acid oxidase (PIPOX), mRNA [NM_016518]                                                           | 51268 |

|              |      |      |      |       |         |                                                                                      |       |
|--------------|------|------|------|-------|---------|--------------------------------------------------------------------------------------|-------|
| A_23_P143662 | 1.5  | 1.5  | 3.5  | 3.0   | PISD    | Homo sapiens phosphatidyserine decarboxylase (PISD), mRNA [NM_014338]                | 23761 |
| A_23_P89283  | -1.3 | 1.1  | -2.1 | -1.3  | PITPNA  | Homo sapiens phosphatidylinositol transfer protein, alpha (PITPNA), mRNA [NM_006224] | 5306  |
| A_24_P305678 | -1.0 | -1.1 | -1.2 | -14.9 | PITPNB  | Homo sapiens phosphatidylinositol transfer protein, beta (PITPNB), mRNA [NM_012399]  | 23760 |
| A_24_P772103 | -1.0 | -2.0 | -1.0 | -1.0  | PITPNC1 | Homo sapiens cDNA FLJ37405 fis, clone BRAMY2028269. [AK094724]                       | 26207 |

|              |      |       |     |     |         |                                                                                                                             |       |
|--------------|------|-------|-----|-----|---------|-----------------------------------------------------------------------------------------------------------------------------|-------|
| A_23_P1519   | 1.1  | 1.5   | 2.2 | 1.2 | PITPNM1 | Homo sapiens phosphatidylinositol transfer protein, membrane-associated 1 (PITPNM1), transcript variant 1, mRNA [NM_004910] | 9600  |
| A_23_P403542 | -1.0 | -19.1 | 1.0 | 1.0 | PITPNM2 | Homo sapiens phosphatidylinositol transfer protein, membrane-associated 2 (PITPNM2), mRNA [NM_020845]                       | 57605 |
| A_23_P401361 | 3.8  | 3.6   | 3.4 | 3.5 | PITPNM2 | Homo sapiens phosphatidylinositol transfer protein, membrane-associated 2 (PITPNM2), mRNA [NM_020845]                       | 57605 |

|              |      |      |      |      |         |                                                                                                                                           |       |
|--------------|------|------|------|------|---------|-------------------------------------------------------------------------------------------------------------------------------------------|-------|
| A_23_P66753  | -1.4 | -1.4 | -3.6 | -3.8 | PITPNM3 | Homo sapiens PITPNM family member 3 (PITPNM3), transcript variant 1, mRNA [NM_031220]                                                     | 83394 |
| A_23_P52402  | -1.0 | -7.8 | -1.5 | -1.1 | PITRM1  | Homo sapiens pitrilysin metalloproteinase 1 (PITRM1), nuclear gene encoding mitochondrial protein, transcript variant 2, mRNA [NM_014889] | 10531 |
| A_23_P167367 | 2.9  | 1.1  | 3.6  | 2.0  | PITX2   | Homo sapiens paired-like homeodomain 2 (PITX2), transcript variant 2, mRNA [NM_153426]                                                    | 5308  |

|              |      |      |      |      |        |                                                                                                  |        |
|--------------|------|------|------|------|--------|--------------------------------------------------------------------------------------------------|--------|
| A_24_P221858 | -1.0 | -2.2 | -1.0 | -1.0 | PIWIL3 | Homo sapiens piwi-like 3 (Drosophila) (PIWIL3), mRNA [NM_001008496]                              | 440822 |
| A_23_P11244  | 1.9  | 2.4  | 1.7  | 1.8  | PJA1   | Homo sapiens praja ring finger 1 (PJA1), transcript variant 3, mRNA [NM_022368]                  | 64219  |
| A_23_P133470 | 3.6  | 3.6  | 3.6  | 3.7  | PJA2   | Homo sapiens praja ring finger 2 (PJA2), mRNA [NM_014819]                                        | 9867   |
| A_32_P92489  | 3.0  | 1.0  | 1.1  | 1.1  | PKD1L2 | Homo sapiens polycystic kidney disease 1-like 2 (PKD1L2), transcript variant 1, mRNA [NM_052892] | 114780 |



|              |      |     |      |      |        |                                                                                                      |        |
|--------------|------|-----|------|------|--------|------------------------------------------------------------------------------------------------------|--------|
| A_23_P129332 | 1.0  | 1.0 | -7.1 | 1.0  | PKD1L2 | Homo sapiens polycystic kidney disease 1-like 2 (PKD1L2), transcript variant 3, mRNA [NM_001076780]  | 114780 |
| A_23_P167324 | 1.1  | 1.0 | -4.6 | 1.1  | PKD2   | Homo sapiens polycystic kidney disease 2 (autosomal dominant) (PKD2), mRNA [NM_000297]               | 5311   |
| A_32_P112493 | -1.0 | 1.1 | -5.0 | -1.6 | PKDCC  | Homo sapiens protein kinase domain containing, cytoplasmic homolog (mouse) (PKDCC), mRNA [NM_138370] | 91461  |

|              |      |       |      |      |         |                                                                                                                        |       |
|--------------|------|-------|------|------|---------|------------------------------------------------------------------------------------------------------------------------|-------|
| A_23_P392486 | 20.3 | 19.3  | 27.7 | 18.5 | PKHD1L1 | Homo sapiens polycystic kidney and hepatic disease 1 (autosomal recessive)-like 1 (PKHD1L1), mRNA [NM_177531]          | 93035 |
| A_23_P31765  | -2.5 | 1.0   | -1.7 | -1.0 | PKIA    | Homo sapiens protein kinase (cAMP-dependent, catalytic) inhibitor alpha (PKIA), transcript variant 1, mRNA [NM_006823] | 5569  |
| A_23_P91221  | 1.0  | -26.8 | -1.0 | 1.1  | PKIG    | Homo sapiens protein kinase (cAMP-dependent, catalytic) inhibitor gamma (PKIG), transcript variant 1, mRNA [NM_181805] | 11142 |

|              |      |      |      |      |      |                                                                                                                                         |      |
|--------------|------|------|------|------|------|-----------------------------------------------------------------------------------------------------------------------------------------|------|
| A_24_P325533 | 8.7  | 12.6 | 5.3  | 4.3  | PKLR | Homo sapiens pyruvate kinase, liver and RBC (PKLR), nuclear gene encoding mitochondrial protein, transcript variant 1, mRNA [NM_000298] | 5313 |
| A_23_P201022 | -1.9 | -7.2 | -2.5 | -2.3 | PKLR | Homo sapiens pyruvate kinase, liver and RBC (PKLR), nuclear gene encoding mitochondrial protein, transcript variant 1, mRNA [NM_000298] | 5313 |
| A_23_P399501 | -1.4 | -2.5 | -1.5 | -1.4 | PKM2 | Homo sapiens pyruvate kinase, muscle (PKM2), transcript variant 2, mRNA [NM_182470]                                                     | 5315 |

|              |      |      |      |      |        |                                                                                                                        |      |
|--------------|------|------|------|------|--------|------------------------------------------------------------------------------------------------------------------------|------|
| A_23_P398515 | 2.4  | 3.1  | 2.2  | 3.4  | PKMYT1 | Homo sapiens protein kinase, membrane associated tyrosine/threonine 1 (PKMYT1), transcript variant 1, mRNA [NM_004203] | 9088 |
| A_24_P342410 | -2.4 | 1.1  | -1.0 | -1.3 | PKN2   | Homo sapiens PRO2042 mRNA, complete cds. [AF118089]                                                                    | 5586 |
| A_23_P23227  | 1.8  | 1.1  | -2.2 | 1.9  | PKN2   | Homo sapiens protein kinase N2 (PKN2), mRNA [NM_006256]                                                                | 5586 |
| A_24_P133288 | -4.1 | -5.0 | 1.8  | -1.2 | PKP2   | H.sapiens mRNA for plakophilin 2a and b. [X97675]                                                                      | 5318 |

|              |      |      |      |      |          |                                                                                        |       |
|--------------|------|------|------|------|----------|----------------------------------------------------------------------------------------|-------|
| A_23_P162466 | 1.5  | 2.2  | 1.4  | 1.4  | PKP2     | Homo sapiens plakophilin 2 (PKP2), transcript variant 2b, mRNA [NM_004572]             | 5318  |
| A_23_P95810  | -4.9 | -2.1 | -1.6 | -3.9 | PKP3     | Homo sapiens plakophilin 3 (PKP3), mRNA [NM_007183]                                    | 11187 |
| A_24_P294408 | 2.1  | 2.0  | 1.8  | 1.9  | PLA1A    | Homo sapiens phospholipase A1 member A (PLA1A), transcript variant 1, mRNA [NM_015900] | 51365 |
| A_23_P88767  | -1.1 | -1.2 | 2.6  | -1.4 | PLA2G10  | Homo sapiens phospholipase A2, group X (PLA2G10), mRNA [NM_003561]                     | 8399  |
| A_24_P706752 | 1.0  | -6.0 | -1.1 | -8.3 | PLA2G12A | Homo sapiens phospholipase A2, group XIIA (PLA2G12A), mRNA [NM_030821]                 | 81579 |

|              |       |      |      |      |          |                                                                                |       |
|--------------|-------|------|------|------|----------|--------------------------------------------------------------------------------|-------|
| A_23_P388150 | 1.1   | 2.2  | 1.8  | 1.9  | PLA2G12B | Homo sapiens phospholipase A2, group XIIB (PLA2G12B), mRNA [NM_032562]         | 84647 |
| A_23_P3584   | 2.1   | 2.5  | 2.1  | 1.7  | PLA2G15  | Homo sapiens phospholipase A2, group XV (PLA2G15), mRNA [NM_012320]            | 23659 |
| A_24_P224116 | 8.2   | 3.8  | 3.1  | 2.7  | PLA2G1B  | Homo sapiens phospholipase A2, group IB (pancreas) (PLA2G1B), mRNA [NM_000928] | 5319  |
| A_24_P111271 | -16.7 | -1.3 | -1.1 | -1.2 | PLA2G2D  | Homo sapiens phospholipase A2, group IID (PLA2G2D), mRNA [NM_012400]           | 26279 |
| A_23_P114857 | -1.1  | -2.3 | -1.4 | 1.0  | PLA2G2E  | Homo sapiens phospholipase A2, group IIE (PLA2G2E), mRNA [NM_014589]           | 30814 |

|              |      |      |      |      |         |                                                                                                                             |       |
|--------------|------|------|------|------|---------|-----------------------------------------------------------------------------------------------------------------------------|-------|
| A_24_P208081 | 6.0  | 8.0  | 5.4  | 5.5  | PLA2G2F | Homo sapiens phospholipase A2, group IIF (PLA2G2F), mRNA [NM_022819]                                                        | 64600 |
| A_23_P17821  | 2.1  | 2.0  | 1.8  | -1.2 | PLA2G3  | Homo sapiens phospholipase A2, group III (PLA2G3), mRNA [NM_015715]                                                         | 50487 |
| A_23_P17814  | -1.0 | 1.4  | -1.0 | 5.3  | PLA2G3  | Homo sapiens phospholipase A2, group III (PLA2G3), mRNA [NM_015715]                                                         | 50487 |
| A_23_P50508  | 2.3  | -6.3 | -1.5 | -1.2 | PLA2G4C | Homo sapiens phospholipase A2, group IVC (cytosolic, calcium-independent) (PLA2G4C), transcript variant 1, mRNA [NM_003706] | 8605  |

|              |      |      |      |      |         |                                                                                                                             |        |
|--------------|------|------|------|------|---------|-----------------------------------------------------------------------------------------------------------------------------|--------|
| A_24_P316439 | -8.6 | -1.3 | -1.0 | -2.4 | PLA2G4C | Homo sapiens phospholipase A2, group IVC (cytosolic, calcium-independent) (PLA2G4C), transcript variant 1, mRNA [NM_003706] | 8605   |
| A_23_P358531 | 3.5  | 3.3  | -1.1 | 2.1  | PLA2G4D | Homo sapiens phospholipase A2, group IVD (cytosolic), mRNA (cDNA clone IMAGE:5167964), complete cds. [BC034571]             | 283748 |
| A_24_P147169 | -1.0 | 1.3  | -2.5 | -1.0 | PLA2G4F | Homo sapiens phospholipase A2, group IVF (PLA2G4F), transcript variant 1, mRNA [NM_213600]                                  | 255189 |



|              |       |      |      |      |        |                                                                                                                                                |        |
|--------------|-------|------|------|------|--------|------------------------------------------------------------------------------------------------------------------------------------------------|--------|
| A_23_P103465 | -3.1  | 1.2  | 1.1  | -3.2 | PLA2G5 | Homo sapiens phospholipase A2, group V (PLA2G5), mRNA [NM_000929]                                                                              | 5322   |
| A_23_P145096 | -20.0 | 1.0  | 1.0  | 1.1  | PLA2G7 | Homo sapiens phospholipase A2, group VII (platelet-activating factor acetylhydrolase, plasma) (PLA2G7), transcript variant 1, mRNA [NM_005084] | 7941   |
| A_23_P142830 | -1.0  | -1.0 | -2.5 | -1.8 | PLA2R1 | Homo sapiens phospholipase A2 receptor 1, 180kDa (PLA2R1), transcript variant 1, mRNA [NM_007366]                                              | 22925  |
| A_24_P76558  | -4.2  | 1.4  | 1.4  | 1.0  | PLAC4  | Homo sapiens placenta-specific 4 (PLAC4), mRNA [NM_182832]                                                                                     | 191585 |

|              |      |      |      |     |        |                                                                                                |        |
|--------------|------|------|------|-----|--------|------------------------------------------------------------------------------------------------|--------|
| A_32_P216241 | -1.2 | -1.8 | -1.6 | 2.0 | PLAC4  | Homo sapiens placenta-specific 4 (PLAC4), mRNA [NM_182832]                                     | 191585 |
| A_24_P183128 | -1.3 | -1.1 | -2.1 | 1.1 | PLAC8  | Homo sapiens placenta-specific 8 (PLAC8), transcript variant 2, mRNA [NM_016619]               | 51316  |
| A_24_P312041 | 2.5  | -6.1 | 1.9  | 3.3 | PLAGL1 | Homo sapiens pleiomorphic adenoma gene-like 1 (PLAGL1), transcript variant 2, mRNA [NM_006718] | 5325   |
| A_23_P6151   | 1.5  | -4.8 | 1.6  | 1.1 | PLAGL2 | Homo sapiens pleiomorphic adenoma gene-like 2 (PLAGL2), mRNA [NM_002657]                       | 5326   |

|              |      |     |     |      |       |                                                                                                                               |        |
|--------------|------|-----|-----|------|-------|-------------------------------------------------------------------------------------------------------------------------------|--------|
| A_23_P329321 | -1.1 | 2.1 | 1.9 | 1.0  | PLB1  | Homo sapiens cDNA FLJ30866 fis, clone FEBRA2004110, highly similar to PHOSPHOLIPASE ADRAB-B PRECURSOR (EC 3.1.-.-). [AK05428] | 151056 |
| A_23_P56356  | 1.2  | 2.1 | 1.4 | 1.1  | PLB1  | Homo sapiens phospholipase B1 (PLB1), transcript variant 1, mRNA [NM_153021]                                                  | 151056 |
| A_24_P379616 | 1.5  | 1.5 | 1.0 | -2.8 | PLB1  | Homo sapiens phospholipase B1 (PLB1), transcript variant 1, mRNA [NM_153021]                                                  | 151056 |
| A_23_P87709  | 1.1  | 1.0 | 1.0 | 2.6  | PLBD1 | Homo sapiens phospholipase B domain containing 1 (PLBD1), mRNA [NM_024829]                                                    | 79887  |

|              |      |      |      |      |       |                                                                                                                      |      |
|--------------|------|------|------|------|-------|----------------------------------------------------------------------------------------------------------------------|------|
| A_24_P287664 | 5.6  | 6.9  | 5.4  | 5.9  | PLCB2 | Homo sapiens phospholipase C, beta 2 (PLCB2), mRNA [NM_004573]                                                       | 5330 |
| A_23_P343719 | -1.0 | -1.3 | 1.3  | -3.1 | PLCB3 | Homo sapiens phospholipase C, beta 3 (phosphatidylinositol-specific) (PLCB3), transcript variant 1, mRNA [NM_000932] | 5331 |
| A_23_P28898  | 1.0  | -3.4 | -1.4 | 2.0  | PLCB4 | Homo sapiens phospholipase C, beta 4 (PLCB4), transcript variant 1, mRNA [NM_000933]                                 | 5332 |
| A_23_P80739  | -2.5 | -1.3 | -1.8 | -2.5 | PLCD1 | Homo sapiens phospholipase C, delta 1 (PLCD1), transcript variant 2, mRNA [NM_006225]                                | 5333 |

|              |      |      |      |      |       |                                                                                     |        |
|--------------|------|------|------|------|-------|-------------------------------------------------------------------------------------|--------|
| A_23_P351757 | 3.0  | 2.6  | 2.1  | 3.9  | PLCD3 | Homo sapiens phospholipase C, delta 3 (PLCD3), mRNA [NM_133373]                     | 113026 |
| A_23_P339240 | -1.7 | -1.7 | -9.8 | -1.1 | PLCH1 | Homo sapiens phospholipase C, eta 1 (PLCH1), transcript variant 2, mRNA [NM_014996] | 23007  |
| A_24_P62469  | 2.0  | 2.4  | -2.0 | 1.9  | PLCH2 | Homo sapiens phospholipase C, eta 2 (PLCH2), mRNA [NM_014638]                       | 9651   |
| A_24_P21887  | -1.0 | 2.3  | 1.1  | 1.9  | PLCH2 | Homo sapiens phospholipase C, eta 2 (PLCH2), mRNA [NM_014638]                       | 9651   |
| A_32_P149158 | 3.9  | 3.7  | 5.0  | 3.6  | PLCL1 | Homo sapiens phospholipase C-like 1 (PLCL1), mRNA [NM_006226]                       | 5334   |

|              |       |      |      |      |       |                                                                                                |       |
|--------------|-------|------|------|------|-------|------------------------------------------------------------------------------------------------|-------|
| A_23_P80594  | -15.6 | -1.0 | -1.1 | -5.9 | PLCL2 | Homo sapiens phospholipase C-like 2 (PLCL2), transcript variant 2, mRNA [NM_015184]            | 23228 |
| A_24_P281988 | -1.1  | -1.7 | -2.1 | -1.0 | PLCL2 | Homo sapiens phospholipase C-like 2 (PLCL2), transcript variant 2, mRNA [NM_015184]            | 23228 |
| A_23_P105524 | 1.0   | -3.1 | 1.1  | 1.0  | PLCZ1 | Homo sapiens phospholipase C, zeta 1 (PLCZ1), mRNA [NM_033123]                                 | 89869 |
| A_23_P398774 | -1.3  | -4.6 | -1.4 | -1.5 | PLD1  | phospholipase D1, phosphatidylcholine-specific [Source:HGNC Symbol;Acc:9067] [ENST00000471075] | 5337  |

|              |      |      |      |      |      |                                                                                              |        |
|--------------|------|------|------|------|------|----------------------------------------------------------------------------------------------|--------|
| A_23_P27515  | 2.2  | 1.3  | 1.3  | 1.7  | PLD3 | Homo sapiens phospholipase D family, member 3 (PLD3), transcript variant 2, mRNA [NM_012268] | 23646  |
| A_24_P936312 | -2.7 | -2.3 | -4.3 | -2.4 | PLD3 | Homo sapiens mRNA; cDNA DKFZp686J11131 (from clone DKFZp686J11131). [BX648310]               | 23646  |
| A_23_P88228  | -2.9 | -3.0 | -3.9 | -1.2 | PLD4 | Homo sapiens phospholipase D family, member 4 (PLD4), mRNA [NM_138790]                       | 122618 |

|              |      |      |      |      |         |                                                                                                                                         |       |
|--------------|------|------|------|------|---------|-----------------------------------------------------------------------------------------------------------------------------------------|-------|
| A_24_P914759 | -1.8 | 1.0  | -1.2 | -8.6 | PLEC    | Homo sapiens plectin (PLEC), nuclear gene encoding mitochondrial protein, transcript variant 8, mRNA [NM_201382]                        | 5339  |
| A_23_P22119  | 1.2  | 1.1  | -8.6 | 1.1  | PLEC    | Homo sapiens plectin (PLEC), transcript variant 6, mRNA [NM_201380]                                                                     | 5339  |
| A_23_P151506 | 1.4  | -1.5 | -1.7 | -4.5 | PLEK2   | Homo sapiens pleckstrin 2 (PLEK2), mRNA [NM_016445]                                                                                     | 26499 |
| A_23_P314363 | -6.4 | 1.1  | -1.1 | -1.0 | PLEKHA2 | Homo sapiens pleckstrin homology domain containing , family A (phosphoinositide binding specific) member 2 (PLEKHA2) , mRNA [NM_021623] | 59339 |



|              |       |      |      |      |         |                                                                                                                                                         |       |
|--------------|-------|------|------|------|---------|---------------------------------------------------------------------------------------------------------------------------------------------------------|-------|
| A_32_P209206 | 1.0   | -1.1 | -1.7 | -2.5 | PLEKHA3 | Homo sapiens pleckstrin homology domain containing , family A (phosphoinositide binding specific) member 3, mRNA (cDNA clone IMAGE:4345190). [BC035471] | 65977 |
| A_24_P328471 | -16.1 | -1.0 | -1.0 | -1.0 | PLEKHA3 | Homo sapiens pleckstrin homology domain containing , family A (phosphoinositide binding specific) member 3 (PLEKHA3) , mRNA [NM_019091]                 | 65977 |

|              |      |      |      |      |         |                                                                                                                                                               |       |
|--------------|------|------|------|------|---------|---------------------------------------------------------------------------------------------------------------------------------------------------------------|-------|
| A_23_P67360  | 1.6  | -4.3 | -1.0 | 1.0  | PLEKHA4 | Homo sapiens pleckstrin homology domain containing , family A (phosphoinositide binding specific) member 4 (PLEKHA4) , transcript variant 1, mRNA [NM_020904] | 57664 |
| A_24_P41170  | -4.1 | -1.0 | -1.1 | 1.5  | PLEKHA5 | pleckstrin homology domain containing , family A member 5 [Source:HGNC Symbol;Acc:30036] [ENST00000510738]                                                    | 54477 |
| A_23_P431268 | -2.4 | -1.1 | -1.2 | -1.1 | PLEKHA6 | Homo sapiens pleckstrin homology domain containing , family A member 6 (PLEKHA6) , mRNA [NM_014935]                                                           | 22874 |

|              |      |      |     |      |         |                                                                                                                                         |       |
|--------------|------|------|-----|------|---------|-----------------------------------------------------------------------------------------------------------------------------------------|-------|
| A_23_P148753 | 1.8  | 1.8  | 2.4 | 1.0  | PLEKHA6 | Homo sapiens pleckstrin homology domain containing , family A member 6 (PLEKHA6) , mRNA [NM_014935]                                     | 22874 |
| A_24_P56073  | -3.8 | 1.9  | 1.1 | -1.0 | PLEKHB1 | Homo sapiens pleckstrin homology domain containing , family B (evectins) member 1 (PLEKHB1) , transcript variant 1, mRNA [NM_021200]    | 58473 |
| A_24_P873414 | 1.6  | -1.2 | 1.5 | -3.4 | PLEKHB2 | Homo sapiens pleckstrin homology domain containing , family B (evectins) member 2 (PLEKHB2) , transcript variant 3, mRNA [NM_001100623] | 55041 |

|              |      |     |      |      |         |                                                                                                                       |       |
|--------------|------|-----|------|------|---------|-----------------------------------------------------------------------------------------------------------------------|-------|
| A_23_P79134  | -4.7 | 1.1 | -3.4 | -2.9 | PLEKHF1 | Homo sapiens pleckstrin homology domain containing , family F (with FYVE domain) member 1 (PLEKHF1), mRNA [NM_024310] | 79156 |
| A_24_P194068 | 5.6  | 4.4 | 6.0  | 2.7  | PLEKHF1 | Homo sapiens pleckstrin homology domain containing , family F (with FYVE domain) member 1 (PLEKHF1), mRNA [NM_024310] | 79156 |
| A_23_P20275  | 1.6  | 1.6 | 2.0  | 1.6  | PLEKHF2 | Homo sapiens pleckstrin homology domain containing , family F (with FYVE domain) member 2 (PLEKHF2), mRNA [NM_024613] | 79666 |

|              |      |     |      |      |          |                                                                                                                           |        |
|--------------|------|-----|------|------|----------|---------------------------------------------------------------------------------------------------------------------------|--------|
| A_23_P323563 | -1.7 | 3.9 | 1.2  | 1.5  | PLEKHG2  | Homo sapiens pleckstrin homology domain containing , family G (with RhoGef domain) member 2 (PLEKHG2) , mRNA [NM_022835]  | 64857  |
| A_32_P129269 | 1.6  | 2.4 | -1.7 | -1.2 | PLEKHG4B | Homo sapiens pleckstrin homology domain containing , family G (with RhoGef domain) member 4B (PLEKHG4B), mRNA [NM_052909] | 153478 |
| A_23_P81640  | -1.2 | 3.2 | 2.5  | -1.1 | PLEKHG4B | Homo sapiens pleckstrin homology domain containing , family G (with RhoGef domain) member 4B (PLEKHG4B), mRNA [NM_052909] | 153478 |

|              |     |     |      |      |         |                                                                                                                                                |       |
|--------------|-----|-----|------|------|---------|------------------------------------------------------------------------------------------------------------------------------------------------|-------|
| A_23_P149626 | 1.2 | 1.1 | -3.0 | -1.1 | PLEKHG5 | Homo sapiens pleckstrin homology domain containing , family G (with RhoGef domain) member 5 (PLEKHG5) , transcript variant 2, mRNA [NM_198681] | 57449 |
| A_24_P301063 | 3.3 | 1.3 | 1.3  | 1.7  | PLEKHG6 | Homo sapiens pleckstrin homology domain containing , family G (with RhoGef domain) member 6 (PLEKHG6) , transcript variant 1, mRNA [NM_018173] | 55200 |

|              |     |     |      |      |         |                                                                                                                                             |       |
|--------------|-----|-----|------|------|---------|---------------------------------------------------------------------------------------------------------------------------------------------|-------|
| A_32_P172188 | 4.0 | 6.0 | 12.9 | -1.1 | PLEKHH3 | Homo sapiens pleckstrin homology domain containing , family H (with MyTH4 domain) member 3 (PLEKHH3) , mRNA [NM_024927]                     | 79990 |
| A_23_P164112 | 6.7 | 6.0 | 9.4  | 1.4  | PLEKHM1 | Homo sapiens pleckstrin homology domain containing , family M (with RUN domain) member 1 (PLEKHM1) , transcript variant 1, mRNA [NM_014798] | 9842  |

|              |      |      |      |      |         |                                                                                                                                            |       |
|--------------|------|------|------|------|---------|--------------------------------------------------------------------------------------------------------------------------------------------|-------|
| A_23_P152727 | -2.9 | 1.0  | -1.0 | 1.1  | PLEKHM1 | Homo sapiens pleckstrin homology domain containing , family M (with RUN domain) member 1 (PLEKHM1), transcript variant 1, mRNA [NM_014798] | 9842  |
| A_23_P129246 | 1.2  | -1.7 | -2.0 | -1.4 | PLEKHO2 | Homo sapiens pleckstrin homology domain containing , family O member 2 (PLEKHO2), transcript variant 1, mRNA [NM_025201]                   | 80301 |
| A_32_P14178  | 5.5  | 5.3  | 4.9  | 5.4  | PLG     | Homo sapiens plasminogen (PLG), transcript variant 1, mRNA [NM_000301]                                                                     | 5340  |



|              |      |      |      |      |        |                                                                                              |        |
|--------------|------|------|------|------|--------|----------------------------------------------------------------------------------------------|--------|
| A_24_P923011 | -1.2 | 1.2  | -4.8 | -1.7 | PLG    | Homo sapiens plasminogen (PLG), transcript variant 1, mRNA [NM_000301]                       | 5340   |
| A_23_P134953 | -1.8 | -2.7 | -1.8 | -4.3 | PLIN2  | Homo sapiens perilipin 2 (PLIN2), transcript variant 1, mRNA [NM_001122]                     | 123    |
| A_24_P272222 | 2.5  | 1.6  | 1.5  | 1.5  | PLIN5  | Homo sapiens perilipin 5 (PLIN5), mRNA [NM_001013706]                                        | 440503 |
| A_23_P118174 | 3.4  | 2.2  | 1.7  | 4.4  | PLK1   | Homo sapiens polo-like kinase 1 (PLK1), mRNA [NM_005030]                                     | 5347   |
| A_23_P154740 | -2.6 | 1.3  | 1.1  | -1.0 | PLK1S1 | Homo sapiens polo-like kinase 1 substrate 1 (PLK1S1), transcript variant 1, mRNA [NM_018474] | 55857  |

|              |       |       |       |      |       |                                                                                           |       |
|--------------|-------|-------|-------|------|-------|-------------------------------------------------------------------------------------------|-------|
| A_23_P155969 | 3.4   | 3.1   | 3.8   | 2.6  | PLK4  | Homo sapiens polo-like kinase 4 (PLK4), transcript variant 1, mRNA [NM_014264]            | 10733 |
| A_23_P43763  | -3.2  | 1.8   | -1.7  | -2.1 | PLLP  | Homo sapiens plasmolipin (PLLIP), mRNA [NM_015993]                                        | 51090 |
| A_24_P414803 | 323.5 | 204.4 | 265.5 | 39.9 | PLN   | Homo sapiens phospholamban (PLN), mRNA [NM_002667]                                        | 5350  |
| A_23_P137532 | 1.7   | 1.5   | 2.6   | 1.3  | PLOD1 | Homo sapiens procollagen-lysine, 2-oxoglutarate 5-dioxygenase 1 (PLOD1), mRNA [NM_000302] | 5351  |

|             |      |      |      |       |        |                                                                                            |       |
|-------------|------|------|------|-------|--------|--------------------------------------------------------------------------------------------|-------|
| A_23_P80508 | -1.4 | -4.0 | -1.8 | -23.2 | PLSCR2 | Homo sapiens phospholipid scramblase 2 (PLSCR2), transcript variant 1, mRNA [NM_001199978] | 57047 |
| A_23_P91910 | 1.1  | 1.1  | -1.0 | -2.5  | PLSCR4 | Homo sapiens phospholipid scramblase 4 (PLSCR4), transcript variant 2, mRNA [NM_020353]    | 57088 |
| A_23_P5983  | 1.2  | 1.7  | 1.4  | 4.1   | PLTP   | Homo sapiens phospholipid transfer protein (PLTP), transcript variant 1, mRNA [NM_006227]  | 5360  |
| A_23_P56328 | -1.6 | -3.3 | -1.9 | -2.3  | PLVAP  | Homo sapiens plasmalemma vesicle associated protein (PLVAP), mRNA [NM_031310]              | 83483 |

|              |      |      |      |      |        |                                                                               |       |
|--------------|------|------|------|------|--------|-------------------------------------------------------------------------------|-------|
| A_24_P245589 | -1.4 | 2.0  | -1.8 | -1.0 | PLVAP  | Homo sapiens plasmalemma vesicle associated protein (PLVAP), mRNA [NM_031310] | 83483 |
| A_32_P208823 | 10.4 | 11.7 | 11.1 | 8.6  | PLXDC1 | Homo sapiens plexin domain containing 1 (PLXDC1), mRNA [NM_020405]            | 57125 |
| A_24_P246262 | -1.5 | -2.6 | -1.7 | -1.9 | PLXNA4 | Homo sapiens plexin A4 (PLXNA4), transcript variant 1, mRNA [NM_020911]       | 91584 |
| A_23_P57961  | -4.6 | -1.0 | -1.1 | -1.0 | PLXNB1 | Homo sapiens plexin B1 (PLXNB1), transcript variant 1, mRNA [NM_002673]       | 5364  |
| A_24_P70888  | -1.2 | -8.0 | -1.3 | -2.0 | PLXNB2 | Homo sapiens plexin B2 (PLXNB2), mRNA [NM_012401]                             | 23654 |

|              |      |      |       |       |        |                                                                              |        |
|--------------|------|------|-------|-------|--------|------------------------------------------------------------------------------|--------|
| A_23_P137168 | 1.5  | 2.5  | 1.7   | 1.9   | PLXNB3 | Homo sapiens plexin B3 (PLXNB3), transcript variant 1, mRNA [NM_005393]      | 5365   |
| A_23_P414958 | -2.6 | -1.8 | -16.4 | -3.1  | PLXNC1 | Homo sapiens plexin C1 (PLXNC1), transcript variant 1, mRNA [NM_005761]      | 10154  |
| A_23_P80752  | 4.9  | 4.6  | 4.1   | 5.3   | PLXND1 | Homo sapiens plexin D1 (PLXND1), mRNA [NM_015103]                            | 23129  |
| A_24_P376391 | 2.3  | 2.3  | 1.3   | -2.9  | PLXND1 | Homo sapiens plexin D1 (PLXND1), mRNA [NM_015103]                            | 23129  |
| A_32_P86118  | 1.1  | 1.1  | 1.0   | -20.4 | PM20D2 | Homo sapiens peptidase M20 domain containing 2 (PM20D2), mRNA [NM_001010853] | 135293 |

|              |      |       |      |      |        |                                                                                                                  |       |
|--------------|------|-------|------|------|--------|------------------------------------------------------------------------------------------------------------------|-------|
| A_23_P321223 | -1.3 | -1.0  | -2.2 | -1.0 | PMCH   | Homo sapiens pro-melanin-concentrating hormone (PMCH), mRNA [NM_002674]                                          | 5367  |
| A_23_P312851 | 5.5  | 2.9   | 2.8  | 2.9  | PMEL   | Homo sapiens premelanosome protein (PMEL), transcript variant 3, mRNA [NM_006928]                                | 6490  |
| A_23_P2233   | 1.2  | -21.1 | -1.5 | 1.1  | PMEL   | Homo sapiens premelanosome protein (PMEL), transcript variant 3, mRNA [NM_006928]                                | 6490  |
| A_23_P57089  | 1.2  | -1.5  | -1.0 | -2.0 | PMEPA1 | Homo sapiens prostate transmembrane protein, androgen induced 1 (PMEPA1), transcript variant 1, mRNA [NM_020182] | 56937 |

|              |      |      |      |      |      |                                                                                          |       |
|--------------|------|------|------|------|------|------------------------------------------------------------------------------------------|-------|
| A_23_P635    | -1.0 | -5.1 | 1.8  | -1.1 | PMF1 | Homo sapiens polyamine-modulated factor 1 (PMF1), transcript variant 2, mRNA [NM_007221] | 11243 |
| A_24_P207139 | -3.1 | 1.0  | -1.0 | -3.1 | PML  | Homo sapiens promyelocytic leukemia (PML), transcript variant 1, mRNA [NM_033238]        | 5371  |
| A_23_P306148 | 1.1  | 1.1  | -2.4 | 2.0  | PML  | Homo sapiens promyelocytic leukemia (PML), transcript variant 6, mRNA [NM_002675]        | 5371  |
| A_24_P133542 | -1.0 | -1.0 | -1.0 | 4.4  | PML  | Homo sapiens promyelocytic leukemia (PML), transcript variant 6, mRNA [NM_002675]        | 5371  |

|              |      |      |      |      |      |                                                                                                                      |      |
|--------------|------|------|------|------|------|----------------------------------------------------------------------------------------------------------------------|------|
| A_23_P334664 | -1.2 | -3.6 | -2.7 | 1.1  | PML  | Homo sapiens promyelocytic leukemia (PML), transcript variant 8, mRNA [NM_033247]                                    | 5371 |
| A_23_P40059  | -3.0 | -3.0 | -3.0 | -3.1 | PMS1 | Homo sapiens PMS1 postmeiotic segregation increased 1 (S. cerevisiae) (PMS1), transcript variant 1, mRNA [NM_000534] | 5378 |
| A_24_P410859 | 1.7  | 1.1  | 2.3  | 1.7  | PMS2 | Homo sapiens PMS2 postmeiotic segregation increased 2 (S. cerevisiae) (PMS2), transcript variant 1, mRNA [NM_000535] | 5395 |



|             |      |      |      |      |        |                                                                                                         |      |
|-------------|------|------|------|------|--------|---------------------------------------------------------------------------------------------------------|------|
| A_32_P10272 | -3.2 | -1.0 | -1.0 | -1.0 | PMS2L2 | Homo sapiens postmeiotic segregation increased 2-like 2 pseudogene (PMS2L2), non-coding RNA [NR_003614] | 5380 |
| A_32_P57728 | -1.1 | -1.1 | -2.3 | -8.3 | PMS2P1 | Homo sapiens postmeiotic segregation increased 2 pseudogene 1 (PMS2P1), non-coding RNA [NR_003613]      | 5379 |

|              |      |      |     |      |        |                                                                                                                             |        |
|--------------|------|------|-----|------|--------|-----------------------------------------------------------------------------------------------------------------------------|--------|
| A_32_P185507 | 1.0  | -1.0 | 4.2 | -2.2 | PMS2P1 | Homo sapiens postmeiotic segregation increased 2-like 1, mRNA (cDNA clone IMAGE:6049115), partial cds. [BC044214]           | 5379   |
| A_23_P114774 | -1.0 | 1.1  | 2.3 | 1.0  | PMVK   | Homo sapiens phosphomevalonate kinase (PMVK), mRNA [NM_006556]                                                              | 10654  |
| A_23_P62377  | 5.5  | 5.6  | 5.6 | 5.6  | PNCK   | Homo sapiens pregnancy up-regulated non-ubiquitously expressed CaM kinase (PNCK), transcript variant 1, mRNA [NM_001039582] | 139728 |

|              |      |      |      |      |          |                                                                               |       |
|--------------|------|------|------|------|----------|-------------------------------------------------------------------------------|-------|
| A_23_P35484  | -2.1 | -1.5 | -1.6 | -1.4 | PNLIPRP1 | Homo sapiens pancreatic lipase-related protein 1 (PNLIPRP1), mRNA [NM_006229] | 5407  |
| A_23_P24083  | 1.0  | -4.0 | -1.1 | -1.2 | PNLIPRP2 | Homo sapiens pancreatic lipase-related protein 2 (PNLIPRP2), mRNA [NM_005396] | 5408  |
| A_23_P99771  | 1.2  | -1.8 | 1.5  | 2.9  | PNMA1    | Homo sapiens paraneoplastic antigen MA1 (PNMA1), mRNA [NM_006029]             | 9240  |
| A_24_P153412 | -2.3 | 1.1  | -1.0 | 1.0  | PNMA2    | Homo sapiens paraneoplastic antigen MA2 (PNMA2), mRNA [NM_007257]             | 10687 |

|              |     |      |      |      |       |                                                                                            |        |
|--------------|-----|------|------|------|-------|--------------------------------------------------------------------------------------------|--------|
| A_23_P352950 | 1.5 | -1.1 | -2.0 | -1.9 | PNMA5 | Homo sapiens paraneoplastic antigen like 5 (PNMA5), transcript variant 3, mRNA [NM_052926] | 114824 |
| A_23_P100642 | 1.0 | 2.4  | 1.0  | 1.0  | PNMT  | Homo sapiens phenylethanolamine N-methyltransferase (PNMT), mRNA [NM_002686]               | 5409   |
| A_23_P99582  | 2.4 | 1.8  | 1.4  | 1.2  | PNN   | Homo sapiens pinin, desmosome associated protein (PNN), mRNA [NM_002687]                   | 5411   |

|              |      |      |      |     |        |                                                                                                                 |        |
|--------------|------|------|------|-----|--------|-----------------------------------------------------------------------------------------------------------------|--------|
| A_32_P526255 | 1.3  | -3.0 | 1.3  | 1.3 | PNPLA1 | Homo sapiens patatin-like phospholipase domain containing 1 (PNPLA1), transcript variant 3, mRNA [NM_001145717] | 285848 |
| A_23_P17914  | -1.0 | 2.2  | -1.3 | 1.4 | PNPLA3 | Homo sapiens patatin-like phospholipase domain containing 3 (PNPLA3), mRNA [NM_025225]                          | 80339  |
| A_23_P159797 | 2.8  | 1.2  | 2.4  | 1.1 | PNPLA4 | Homo sapiens patatin-like phospholipase domain containing 4 (PNPLA4), transcript variant 1, mRNA [NM_004650]    | 8228   |

|              |      |      |      |       |        |                                                                                                              |        |
|--------------|------|------|------|-------|--------|--------------------------------------------------------------------------------------------------------------|--------|
| A_23_P377312 | 3.7  | -1.1 | -2.0 | 3.7   | PNPLA5 | Homo sapiens patatin-like phospholipase domain containing 5 (PNPLA5), transcript variant 1, mRNA [NM_138814] | 150379 |
| A_24_P453855 | -3.0 | -3.1 | -4.1 | -11.0 | PNPLA7 | patatin-like phospholipase domain containing 7 [Source:HGNC Symbol;Acc:24768] [ENST00000371450]              | 375775 |
| A_23_P312718 | 2.3  | 1.3  | -1.2 | 1.1   | PNPLA8 | Homo sapiens patatin-like phospholipase domain containing 8 (PNPLA8), mRNA [NM_015723]                       | 50640  |

|              |      |     |     |     |       |                                                                                                                |       |
|--------------|------|-----|-----|-----|-------|----------------------------------------------------------------------------------------------------------------|-------|
| A_23_P154488 | 4.5  | 3.2 | 4.1 | 2.4 | PNPT1 | Homo sapiens polyribonucleotide nucleotidyltransferase 1 (PNPT1), mRNA [NM_033109]                             | 87178 |
| A_24_P354300 | -4.3 | 3.6 | 1.4 | 1.3 | POC1A | Homo sapiens POC1 centriolar protein homolog A (Chlamydomonas) (POC1A), transcript variant 1, mRNA [NM_015426] | 25886 |
| A_23_P212284 | 2.1  | 1.4 | 1.4 | 1.3 | POC1A | Homo sapiens POC1 centriolar protein homolog A (Chlamydomonas) (POC1A), transcript variant 1, mRNA [NM_015426] | 25886 |

|              |      |      |      |      |        |                                                                                              |        |
|--------------|------|------|------|------|--------|----------------------------------------------------------------------------------------------|--------|
| A_23_P368154 | -1.0 | -1.1 | -1.1 | -8.5 | PODN   | Homo sapiens podocan (PODN), transcript variant 1, mRNA [NM_153703]                          | 127435 |
| A_23_P208567 | 1.1  | 1.0  | 2.6  | -1.0 | PODNL1 | Homo sapiens podocan-like 1 (PODNL1), transcript variant 1, mRNA [NM_024825]                 | 79883  |
| A_23_P121037 | -1.0 | -1.1 | -1.3 | -2.5 | PODXL2 | Homo sapiens podocalyxin-like 2 (PODXL2), mRNA [NM_015720]                                   | 50512  |
| A_24_P151692 | 1.4  | 2.4  | 1.1  | 2.5  | POF1B  | Homo sapiens premature ovarian failure, 1B (POF1B), mRNA [NM_024921]                         | 79983  |
| A_23_P68624  | -1.2 | -1.3 | -3.8 | -1.3 | POFUT1 | Homo sapiens protein O-fucosyltransferase 1 (POFUT1), transcript variant 2, mRNA [NM_172236] | 23509  |



|              |     |     |      |      |       |                                                                                                       |       |
|--------------|-----|-----|------|------|-------|-------------------------------------------------------------------------------------------------------|-------|
| A_23_P137715 | 2.0 | 1.2 | -1.4 | -1.1 | POGK  | Homo sapiens pogo transposable element with KRAB domain (POGK), mRNA [NM_017542]                      | 57645 |
| A_23_P500734 | 2.5 | 1.7 | 1.4  | 1.3  | POGZ  | Homo sapiens pogo transposable element with ZNF domain (POGZ), transcript variant 1, mRNA [NM_015100] | 23126 |
| A_32_P1701   | 2.2 | 2.2 | 2.1  | 3.0  | POLA1 | Homo sapiens polymerase (DNA directed), alpha 1, catalytic subunit (POLA1), mRNA [NM_016937]          | 5422  |

|              |      |      |      |      |         |                                                                                                 |       |
|--------------|------|------|------|------|---------|-------------------------------------------------------------------------------------------------|-------|
| A_23_P161615 | 2.8  | -1.0 | 2.2  | 3.8  | POLA2   | Homo sapiens polymerase (DNA directed), alpha 2 (70kD subunit) (POLA2), mRNA [NM_002689]        | 23649 |
| A_32_P34552  | -1.4 | -2.0 | -3.4 | -2.7 | POLB    | Homo sapiens polymerase (DNA directed), beta (POLB), mRNA [NM_002690]                           | 5423  |
| A_24_P142442 | 1.6  | -2.4 | 1.1  | 1.1  | POLDIP2 | Homo sapiens polymerase (DNA-directed), delta interacting protein 2 (POLDIP2), mRNA [NM_015584] | 26073 |

|              |      |      |      |      |         |                                                                                                                       |       |
|--------------|------|------|------|------|---------|-----------------------------------------------------------------------------------------------------------------------|-------|
| A_23_P502269 | -1.6 | 1.2  | -2.1 | -2.2 | POLDIP3 | Homo sapiens polymerase (DNA-directed), delta interacting protein 3 (POLDIP3), transcript variant 1, mRNA [NM_032311] | 84271 |
| A_24_P918387 | 2.0  | 1.0  | 2.1  | -1.0 | POLE    | polymerase (DNA directed), epsilon [Source:HGNC Symbol;Acc:9177] [ENST00000539357]                                    | 5426  |
| A_23_P159355 | -1.4 | -2.9 | 1.3  | -2.2 | POLE    | Homo sapiens polymerase (DNA directed), epsilon (POLE), mRNA [NM_006231]                                              | 5426  |

|              |      |       |      |      |       |                                                                                                                 |       |
|--------------|------|-------|------|------|-------|-----------------------------------------------------------------------------------------------------------------|-------|
| A_23_P163099 | 1.1  | -15.2 | -1.1 | 1.0  | POLE2 | Homo sapiens polymerase (DNA directed), epsilon 2 (p59 subunit) (POLE2), transcript variant 1, mRNA [NM_002692] | 5427  |
| A_23_P135326 | -2.5 | 1.5   | -2.3 | -1.1 | POLE3 | Homo sapiens polymerase (DNA directed), epsilon 3 (p17 subunit) (POLE3), mRNA [NM_017443]                       | 54107 |
| A_23_P383385 | -3.1 | -5.8  | -4.0 | -2.8 | POLE4 | Homo sapiens polymerase (DNA-directed), epsilon 4 (p12 subunit) (POLE4), mRNA [NM_019896]                       | 56655 |
| A_32_P96692  | 1.1  | 1.1   | -1.9 | -3.4 | POLH  | Homo sapiens polymerase (DNA directed), eta (POLH), mRNA [NM_006502]                                            | 5429  |

|              |      |      |      |      |      |                                                                                               |       |
|--------------|------|------|------|------|------|-----------------------------------------------------------------------------------------------|-------|
| A_23_P386450 | -3.0 | -1.4 | -1.4 | -1.6 | POLK | Homo sapiens polymerase (DNA directed) kappa (POLK), mRNA [NM_016218]                         | 51426 |
| A_23_P97889  | 2.3  | 1.4  | -1.1 | 3.5  | POLL | Homo sapiens polymerase (DNA directed), lambda (POLL), transcript variant 2, mRNA [NM_013274] | 27343 |
| A_23_P397371 | 1.4  | 2.2  | -1.9 | -1.0 | POLM | Homo sapiens polymerase (DNA directed), mu (POLM), mRNA [NM_013284]                           | 27434 |
| A_23_P333998 | -1.0 | -2.3 | -1.1 | -1.1 | POLQ | Homo sapiens clone HQ0327 PRO0327 mRNA, complete cds. [AF090919]                              | 10721 |

|              |     |      |       |      |        |                                                                                                                                                 |       |
|--------------|-----|------|-------|------|--------|-------------------------------------------------------------------------------------------------------------------------------------------------|-------|
| A_23_P28450  | 1.4 | -1.1 | -1.9  | -2.1 | POLR1A | Homo sapiens polymerase (RNA) I polypeptide A, 194kDa (POLR1A), mRNA [NM_015425]                                                                | 25885 |
| A_23_P209987 | 1.3 | 1.3  | -10.4 | 1.1  | POLR1B | Homo sapiens polymerase (RNA) I polypeptide B, 128kDa (POLR1B), transcript variant 1, mRNA [NM_019014]                                          | 84172 |
| A_24_P942112 | 1.0 | -4.2 | 1.0   | 1.1  | POLR1B | Homo sapiens cDNA FLJ10816 fis, clone NT2RP4000997, highly similar to DNA-DIRECTED RNA POLYMERASE I 135 KD POLYPEPTIDE (EC 2.7.7.6). [AK001678] | 84172 |

|              |       |      |      |      |        |                                                                                                       |       |
|--------------|-------|------|------|------|--------|-------------------------------------------------------------------------------------------------------|-------|
| A_23_P70409  | -14.9 | -1.0 | -1.3 | 1.0  | POLR1C | Homo sapiens polymerase (RNA) I polypeptide C, 30kDa (POLR1C), mRNA [NM_203290]                       | 9533  |
| A_23_P36928  | 1.2   | 1.7  | -1.1 | 4.1  | POLR1D | Homo sapiens polymerase (RNA) I polypeptide D, 16kDa (POLR1D), transcript variant 1, mRNA [NM_015972] | 51082 |
| A_23_P409541 | -2.3  | 1.1  | 1.1  | -1.4 | POLR1D | Homo sapiens polymerase (RNA) I polypeptide D, 16kDa (POLR1D), transcript variant 2, mRNA [NM_152705] | 51082 |
| A_23_P9458   | 1.1   | 1.1  | -3.2 | 1.1  | POLR1E | Homo sapiens polymerase (RNA) I polypeptide E, 53kDa (POLR1E), mRNA [NM_022490]                       | 64425 |

|              |      |      |      |      |        |                                                                                                  |      |
|--------------|------|------|------|------|--------|--------------------------------------------------------------------------------------------------|------|
| A_24_P308128 | 1.0  | 1.0  | 1.4  | 2.1  | POLR2A | Homo sapiens polymerase (RNA) II (DNA directed) polypeptide A, 220kDa (POLR2A), mRNA [NM_000937] | 5430 |
| A_23_P144311 | 1.2  | 2.1  | -1.5 | -1.1 | POLR2B | Homo sapiens polymerase (RNA) II (DNA directed) polypeptide B, 140kDa (POLR2B), mRNA [NM_000938] | 5431 |
| A_32_P219753 | -4.1 | -1.0 | -1.2 | 1.0  | POLR2D | Homo sapiens polymerase (RNA) II (DNA directed) polypeptide D (POLR2D), mRNA [NM_004805]         | 5433 |



|              |      |     |     |      |        |                                                                                                   |      |
|--------------|------|-----|-----|------|--------|---------------------------------------------------------------------------------------------------|------|
| A_23_P165280 | -1.9 | 2.1 | 2.1 | -4.8 | POLR2E | Homo sapiens polymerase (RNA) II (DNA directed) polypeptide E, 25kDa (POLR2E), mRNA [NM_002695]   | 5434 |
| A_23_P42649  | 4.6  | 4.7 | 1.1 | 2.0  | POLR2J | Homo sapiens polymerase (RNA) II (DNA directed) polypeptide J, 13.3kDa (POLR2J), mRNA [NM_006234] | 5439 |
| A_24_P292020 | 2.4  | 1.6 | 2.0 | 1.9  | POLR2J | Homo sapiens polymerase (RNA) II (DNA directed) polypeptide J, 13.3kDa (POLR2J), mRNA [NM_006234] | 5439 |

|              |      |     |     |      |         |                                                                                                  |        |
|--------------|------|-----|-----|------|---------|--------------------------------------------------------------------------------------------------|--------|
| A_23_P215669 | 1.8  | 5.0 | 3.4 | 5.3  | POLR2J2 | Homo sapiens polymerase (RNA) II (DNA directed) polypeptide J2 (POLR2J2), mRNA [NM_032959]       | 246721 |
| A_23_P157452 | -1.1 | 2.2 | 1.6 | -2.0 | POLR2K  | Homo sapiens polymerase (RNA) II (DNA directed) polypeptide K, 7.0kDa (POLR2K), mRNA [NM_005034] | 5440   |
| A_23_P157449 | -2.9 | 1.5 | 1.8 | -1.2 | POLR2K  | Homo sapiens polymerase (RNA) II (DNA directed) polypeptide K, 7.0kDa (POLR2K), mRNA [NM_005034] | 5440   |

|              |      |      |      |      |        |                                                                                                   |       |
|--------------|------|------|------|------|--------|---------------------------------------------------------------------------------------------------|-------|
| A_24_P85283  | -1.1 | -3.1 | 1.1  | -1.1 | POLR3A | Homo sapiens polymerase (RNA) III (DNA directed) polypeptide A, 155kDa (POLR3A), mRNA [NM_007055] | 11128 |
| A_23_P149834 | 2.4  | 2.8  | 1.0  | 1.5  | POLR3A | Homo sapiens polymerase (RNA) III (DNA directed) polypeptide A, 155kDa (POLR3A), mRNA [NM_007055] | 11128 |
| A_23_P385529 | 4.1  | 12.1 | 12.1 | 4.6  | POLR3E | Homo sapiens mRNA for KIAA1452 protein, partial cds. [AB040885]                                   | 55718 |

|              |      |      |      |      |         |                                                                                                                             |        |
|--------------|------|------|------|------|---------|-----------------------------------------------------------------------------------------------------------------------------|--------|
| A_23_P23855  | 2.0  | 2.7  | 2.7  | 2.2  | POLR3GL | Homo sapiens polymerase (RNA) III (DNA directed) polypeptide G (32kD)-like (POLR3GL), mRNA [NM_032305]                      | 84265  |
| A_32_P201496 | -1.2 | -2.2 | -2.1 | -1.1 | POLR3H  | Homo sapiens polymerase (RNA) III (DNA directed) polypeptide H (22.9kD) (POLR3H), transcript variant 2, mRNA [NM_001018052] | 171568 |
| A_24_P322847 | 1.0  | -1.0 | 1.5  | 2.5  | POLR3H  | Homo sapiens polymerase (RNA) III (DNA directed) polypeptide H (22.9kD) (POLR3H), transcript variant 1, mRNA [NM_138338]    | 171568 |

|              |      |      |      |      |        |                                                                                                                                    |      |
|--------------|------|------|------|------|--------|------------------------------------------------------------------------------------------------------------------------------------|------|
| A_32_P98847  | 1.5  | 1.3  | -1.8 | -2.2 | POLRMT | Homo sapiens polymerase (RNA) mitochondrial (DNA directed) (POLRMT), nuclear gene encoding mitochondrial protein, mRNA [NM_005035] | 5442 |
| A_23_P215431 | -2.9 | 1.1  | -1.0 | -1.0 | POM121 | POM121 membrane glycoprotein [Source:HGNC Symbol;Acc:19702] [ENST00000395270]                                                      | 9883 |
| A_23_P8541   | -3.0 | -1.4 | -1.1 | -1.2 | POM121 | POM121 membrane glycoprotein [Source:HGNC Symbol;Acc:19702] [ENST00000446813]                                                      | 9883 |

|              |     |      |      |      |            |                                                                                                      |        |
|--------------|-----|------|------|------|------------|------------------------------------------------------------------------------------------------------|--------|
| A_24_P266273 | 1.5 | -2.4 | 1.3  | 1.6  | POM121     | Homo sapiens POM121 membrane glycoprotein (POM121), mRNA [NM_172020]                                 | 9883   |
| A_24_P459963 | 1.1 | 1.1  | -1.0 | -2.8 | POM121L10P | Homo sapiens mRNA; cDNA DKFZp686l1532 (from clone DKFZp686l1532). [BX648116]                         | 646074 |
| A_23_P6355   | 2.0 | 2.3  | 3.0  | 2.0  | POM121L1P  | Homo sapiens POM121 membrane glycoprotein-like 1, pseudogene (POM121L1P), non-coding RNA [NR_024591] | 25812  |

|              |      |      |      |      |           |                                                                                                      |        |
|--------------|------|------|------|------|-----------|------------------------------------------------------------------------------------------------------|--------|
| A_32_P14692  | -1.0 | 1.3  | -1.1 | -6.6 | POM121L1P | Homo sapiens POM121 membrane glycoprotein-like 1, pseudogene (POM121L1P), non-coding RNA [NR_024591] | 25812  |
| A_24_P550973 | -1.3 | -1.1 | -2.2 | -2.3 | POM121L4P | Homo sapiens POM121 membrane glycoprotein-like 4 pseudogene (POM121L4P), non-coding RNA [NR_024592]  | 266697 |
| A_32_P107983 | -4.1 | 1.2  | 1.2  | 1.0  | POM121L8P | Homo sapiens POM121 membrane glycoprotein-like 8 pseudogene (POM121L8P), non-coding RNA [NR_024583]  | 29797  |

|              |      |      |      |      |           |                                                                                                                                 |       |
|--------------|------|------|------|------|-----------|---------------------------------------------------------------------------------------------------------------------------------|-------|
| A_23_P91636  | 12.4 | 12.1 | 11.7 | 12.7 | POM121L9P | Homo sapiens POM121 membrane glycoprotein-like 9, pseudogene (POM121L9P), non-coding RNA [NR_003714]                            | 29774 |
| A_23_P96812  | -2.6 | 1.9  | -1.7 | -1.3 | POMGNT1   | Homo sapiens protein O-linked mannose beta1,2-N-acetylglucosaminyltransferase (POMGNT1), transcript variant 1, mRNA [NM_017739] | 55624 |
| A_23_P146361 | 1.7  | 3.6  | 3.3  | 1.3  | POMT1     | Homo sapiens protein-O-mannosyltransferase 1 (POMT1), transcript variant 1, mRNA [NM_007171]                                    | 10585 |



|              |      |      |      |      |        |                                                                                              |       |
|--------------|------|------|------|------|--------|----------------------------------------------------------------------------------------------|-------|
| A_23_P146354 | -3.0 | -9.3 | -3.1 | -2.8 | POMT1  | Homo sapiens protein-O-mannosyltransferase 1 (POMT1), transcript variant 1, mRNA [NM_007171] | 10585 |
| A_23_P168584 | 2.1  | 1.2  | 2.1  | 2.1  | POMZP3 | Homo sapiens POM121 and ZP3 fusion (POMZP3), transcript variant 2, mRNA [NM_152992]          | 22932 |
| A_23_P168576 | 1.6  | -1.6 | -2.1 | -3.3 | POMZP3 | Homo sapiens POM121 and ZP3 fusion (POMZP3), transcript variant 2, mRNA [NM_152992]          | 22932 |
| A_23_P215549 | 4.2  | 7.6  | 2.2  | 4.2  | PON3   | Homo sapiens paraoxonase 3 (PON3), mRNA [NM_000940]                                          | 5446  |

|              |      |      |      |      |        |                                                                                                                                            |       |
|--------------|------|------|------|------|--------|--------------------------------------------------------------------------------------------------------------------------------------------|-------|
| A_23_P94133  | -3.0 | 1.2  | -1.1 | 1.6  | POP1   | Homo sapiens processing of precursor 1, ribonuclease P/MRP subunit ( <i>S. cerevisiae</i> ) (POP1), transcript variant 3, mRNA [NM_015029] | 10940 |
| A_23_P134274 | 1.0  | 1.1  | 2.3  | 1.3  | POP7   | Homo sapiens processing of precursor 7, ribonuclease P/MRP subunit ( <i>S. cerevisiae</i> ) (POP7), mRNA [NM_005837]                       | 10248 |
| A_24_P257336 | -2.2 | -1.8 | 1.2  | -1.5 | POPDC2 | Homo sapiens popeye domain containing 2 (POPDC2), mRNA [NM_022135]                                                                         | 64091 |

|              |      |      |      |      |       |                                                                                                    |        |
|--------------|------|------|------|------|-------|----------------------------------------------------------------------------------------------------|--------|
| A_24_P29723  | 2.7  | -1.6 | -1.6 | -1.2 | POR   | Homo sapiens P450 (cytochrome) oxidoreductase (POR), mRNA [NM_000941]                              | 5447   |
| A_24_P347411 | -2.8 | -1.3 | -4.0 | -2.2 | POSTN | Homo sapiens periostin, osteoblast specific factor (POSTN), transcript variant 1, mRNA [NM_006475] | 10631  |
| A_32_P9455   | -1.8 | 1.3  | 4.3  | 2.9  | POTEE | Homo sapiens POTE ankyrin domain family, member E (POTEE), mRNA [NM_001083538]                     | 445582 |
| A_24_P825874 | -1.0 | -1.9 | -2.3 | -1.1 | POTEE | Homo sapiens POTE ankyrin domain family, member E (POTEE), mRNA [NM_001083538]                     | 445582 |

|              |     |      |      |     |        |                                                                                                      |        |
|--------------|-----|------|------|-----|--------|------------------------------------------------------------------------------------------------------|--------|
| A_32_P16323  | 1.0 | -1.0 | -2.3 | 1.5 | POTEG  | POTE ankyrin domain family, member G [Source:HGNC Symbol;Acc:33896] [ENST00000409832]                | 404785 |
| A_32_P43588  | 8.5 | 2.1  | 7.2  | 8.5 | POTEG  | Homo sapiens POTE ankyrin domain family, member G (POTEG), transcript variant 1, mRNA [NM_001005356] | 404785 |
| A_32_P155776 | 2.8 | 2.7  | -1.4 | 2.5 | POTEKP | Homo sapiens POTE ankyrin domain family, member K, pseudogene (POTEKP), non-coding RNA [NR_033885]   | 440915 |

|              |      |       |     |     |         |                                                                                            |      |
|--------------|------|-------|-----|-----|---------|--------------------------------------------------------------------------------------------|------|
| A_23_P155539 | -2.6 | 1.0   | 1.0 | 1.1 | POU1F1  | Homo sapiens POU class 1 homeobox 1 (POU1F1), transcript variant alpha, mRNA [NM_000306]   | 5449 |
| A_24_P929909 | 5.9  | 5.8   | 6.0 | 4.6 | POU1F1  | Homo sapiens POU class 1 homeobox 1 (POU1F1), transcript variant beta, mRNA [NM_001122757] | 5449 |
| A_23_P312920 | 1.1  | -15.0 | 1.2 | 1.2 | POU2AF1 | Homo sapiens POU class 2 associating factor 1 (POU2AF1), mRNA [NM_006235]                  | 5450 |
| A_24_P296792 | 2.2  | 1.9   | 1.0 | 2.6 | POU2F2  | Homo sapiens POU class 2 homeobox 2 (POU2F2), transcript variant 2, mRNA [NM_002698]       | 5452 |

|              |      |      |      |      |        |                                                                               |      |
|--------------|------|------|------|------|--------|-------------------------------------------------------------------------------|------|
| A_24_P131293 | -1.5 | -1.8 | -1.9 | -2.5 | POU3F1 | Homo sapiens<br>POU class 3<br>homeobox 1<br>(POU3F1),<br>mRNA<br>[NM_002699] | 5453 |
| A_23_P97034  | 1.1  | -2.8 | 1.1  | 1.1  | POU3F1 | Homo sapiens<br>POU class 3<br>homeobox 1<br>(POU3F1),<br>mRNA<br>[NM_002699] | 5453 |
| A_24_P34575  | 1.4  | 2.1  | 1.0  | 1.3  | POU3F3 | Homo sapiens<br>POU class 3<br>homeobox 3<br>(POU3F3),<br>mRNA<br>[NM_006236] | 5455 |
| A_23_P114210 | 3.7  | 5.1  | 3.5  | 1.4  | POU3F4 | Homo sapiens<br>POU class 3<br>homeobox 4<br>(POU3F4),<br>mRNA<br>[NM_000307] | 5456 |

|              |      |      |       |      |        |                                                                                      |      |
|--------------|------|------|-------|------|--------|--------------------------------------------------------------------------------------|------|
| A_23_P302038 | 2.6  | 3.0  | -44.3 | 2.3  | POU4F2 | Homo sapiens POU class 4 homeobox 2 (POU4F2), mRNA [NM_004575]                       | 5458 |
| A_23_P121976 | 1.9  | 1.0  | -3.3  | -1.0 | POU4F3 | Homo sapiens POU class 4 homeobox 3 (POU4F3), mRNA [NM_002700]                       | 5459 |
| A_24_P144601 | 1.7  | 1.2  | 3.4   | 1.2  | POU5F1 | Homo sapiens POU class 5 homeobox 1 (POU5F1), transcript variant 1, mRNA [NM_002701] | 5460 |
| A_23_P59138  | -2.3 | -1.0 | -1.1  | -1.1 | POU5F1 | Homo sapiens POU class 5 homeobox 1 (POU5F1), transcript variant 1, mRNA [NM_002701] | 5460 |

|              |     |       |     |      |          |                                                                                         |        |
|--------------|-----|-------|-----|------|----------|-----------------------------------------------------------------------------------------|--------|
| A_24_P214841 | 1.1 | -17.9 | 1.2 | 1.8  | POU5F1   | Homo sapiens POU class 5 homeobox 1 (POU5F1), transcript variant 1, mRNA [NM_002701]    | 5460   |
| A_24_P383640 | 3.5 | 2.2   | 4.4 | 3.3  | POU5F1P3 | Homo sapiens POU class 5 homeobox 1 pseudogene 3 (POU5F1P3), non-coding RNA [NR_036440] | 642559 |
| A_24_P340659 | 1.3 | 3.5   | 2.6 | -2.9 | POU5F1P4 | Homo sapiens POU class 5 homeobox 1 pseudogene 4 (POU5F1P4), non-coding RNA [NR_034180] | 645682 |



|              |      |      |      |      |        |                                                                                                  |        |
|--------------|------|------|------|------|--------|--------------------------------------------------------------------------------------------------|--------|
| A_23_P358564 | -7.5 | -1.0 | -1.1 | 1.0  | POU5F2 | Homo sapiens POU domain class 5, transcription factor 2 (POU5F2), mRNA [NM_153216]               | 134187 |
| A_23_P147900 | -2.9 | 1.8  | 1.5  | -1.5 | POU6F2 | Homo sapiens POU class 6 homeobox 2 (POU6F2), transcript variant 1, mRNA [NM_007252]             | 11281  |
| A_23_P325572 | -1.0 | -1.1 | -2.3 | -1.0 | PP2D1  | Homo sapiens protein phosphatase 2C-like domain containing 1 (PP2D1), non-coding RNA [NR_027694] | 151649 |

|              |      |      |      |      |        |                                                                                                                                        |       |
|--------------|------|------|------|------|--------|----------------------------------------------------------------------------------------------------------------------------------------|-------|
| A_24_P419300 | -2.0 | 1.0  | 1.0  | 1.1  | PP7080 | Homo sapiens uncharacterized LOC25845 (PP7080), non-coding RNA [NR_024158]                                                             | 25845 |
| A_24_P916494 | -3.3 | -1.4 | -1.5 | -1.9 | PPA2   | Homo sapiens pyrophosphatase (inorganic) 2, mRNA (cDNA clone IMAGE:3866266), with apparent retained intron. [BC008246]                 | 27068 |
| A_24_P214625 | -1.5 | -1.5 | -1.5 | 4.2  | PPA2   | Homo sapiens pyrophosphatase (inorganic) 2 (PPA2), nuclear gene encoding mitochondrial protein, transcript variant 1, mRNA [NM_176869] | 27068 |

|              |       |      |      |     |        |                                                                                                               |      |
|--------------|-------|------|------|-----|--------|---------------------------------------------------------------------------------------------------------------|------|
| A_23_P201808 | 3.9   | 2.5  | 4.6  | 2.2 | PPAP2B | Homo sapiens phosphatidic acid phosphatase type 2B (PPAP2B), mRNA [NM_003713]                                 | 8613 |
| A_23_P108294 | 1.6   | -1.2 | -2.6 | 1.2 | PPAP2C | Homo sapiens phosphatidic acid phosphatase type 2C (PPAP2C), transcript variant 3, mRNA [NM_177543]           | 8612 |
| A_24_P252130 | -22.4 | 1.1  | 1.0  | 1.0 | PPARD  | Homo sapiens peroxisome proliferator-activated receptor delta (PPARD), transcript variant 1, mRNA [NM_006238] | 5467 |

|              |      |      |      |      |          |                                                                                                                                      |        |
|--------------|------|------|------|------|----------|--------------------------------------------------------------------------------------------------------------------------------------|--------|
| A_24_P560519 | -2.0 | 1.4  | -2.2 | 1.6  | PPARGC1B | Homo sapiens peroxisome proliferator-activated receptor gamma, coactivator 1 beta (PPARGC1B), transcript variant 1, mRNA [NM_133263] | 133522 |
| A_23_P213959 | -1.0 | -1.0 | -1.2 | -2.5 | PPARGC1B | Homo sapiens peroxisome proliferator-activated receptor gamma, coactivator 1 beta (PPARGC1B), transcript variant 1, mRNA [NM_133263] | 133522 |
| A_24_P123347 | 4.0  | 1.6  | 3.2  | 2.5  | PPAT     | Homo sapiens phosphoribosyl pyrophosphate amidotransferase (PPAT), mRNA [NM_002703]                                                  | 5471   |

|              |      |      |      |      |       |                                                                                                                                |       |
|--------------|------|------|------|------|-------|--------------------------------------------------------------------------------------------------------------------------------|-------|
| A_23_P163428 | -2.7 | 1.6  | 1.3  | -1.0 | PPCDC | Homo sapiens phosphoantothencycysteine decarboxylase (PPCDC), mRNA [NM_021823]                                                 | 60490 |
| A_24_P327011 | 1.1  | -3.1 | -1.0 | 1.0  | PPCDC | Homo sapiens phosphoantothencycysteine decarboxylase (PPCDC), mRNA [NM_021823]                                                 | 60490 |
| A_23_P120364 | -1.0 | 6.7  | 1.2  | -1.3 | PPDPF | Homo sapiens pancreatic progenitor cell differentiation and proliferation factor homolog (zebrafish) (PPDPF), mRNA [NM_024299] | 79144 |

|             |     |     |       |      |         |                                                                                                                                                                         |      |
|-------------|-----|-----|-------|------|---------|-------------------------------------------------------------------------------------------------------------------------------------------------------------------------|------|
| A_23_P75516 | 1.0 | 1.0 | 1.1   | -5.7 | PPFIA1  | Homo sapiens protein tyrosine phosphatase, receptor type, f polypeptide (PTPRF), interacting protein (liprin), alpha 1 (PPFIA1), transcript variant 2, mRNA [NM_003626] | 8500 |
| A_23_P47867 | 1.0 | 4.4 | -11.5 | 1.0  | PPFIBP1 | Homo sapiens PTPRF interacting protein, binding protein 1 (liprin beta 1) (PPFIBP1), transcript variant 1, mRNA [NM_003622]                                             | 8496 |

|              |      |      |      |      |         |                                                                                                       |       |
|--------------|------|------|------|------|---------|-------------------------------------------------------------------------------------------------------|-------|
| A_23_P409623 | -2.3 | -1.0 | -1.0 | -1.6 | PPFIBP2 | Homo sapiens PTPRF interacting protein, binding protein 2 (liprin beta 2) (PPFIBP2), mRNA [NM_003621] | 8495  |
| A_24_P222454 | 1.2  | 1.1  | 1.0  | -2.0 | PPHLN1  | Homo sapiens periphilin 1 (PPHLN1), transcript variant 5, mRNA [NM_201438]                            | 51535 |
| A_24_P772061 | -1.9 | -1.8 | -2.6 | -1.8 | PPIA    | Homo sapiens peptidylprolyl isomerase A (cyclophilin A) (PPIA), mRNA [NM_021130]                      | 5478  |
| A_32_P68459  | -1.5 | 5.4  | 2.4  | -1.3 | PPIA    | Homo sapiens peptidylprolyl isomerase A (cyclophilin A) (PPIA), mRNA [NM_021130]                      | 5478  |

|              |      |       |      |      |         |                                                                                             |        |
|--------------|------|-------|------|------|---------|---------------------------------------------------------------------------------------------|--------|
| A_24_P340679 | 2.0  | 1.4   | -1.7 | 1.4  | PPIA    | Homo sapiens peptidylprolyl isomerase A (cyclophilin A) (PPIA), mRNA [NM_021130]            | 5478   |
| A_24_P264772 | -2.6 | -1.4  | -1.5 | -1.5 | PPIAL4A | Homo sapiens peptidylprolyl isomerase A (cyclophilin A)-like 4A (PPIAL4A), mRNA [NM_178230] | 164022 |
| A_24_P203226 | -1.0 | -13.2 | -1.2 | -1.1 | PPIAL4A | Homo sapiens peptidylprolyl isomerase A (cyclophilin A)-like 4A (PPIAL4A), mRNA [NM_178230] | 164022 |



|              |       |      |      |      |         |                                                                                                                 |        |
|--------------|-------|------|------|------|---------|-----------------------------------------------------------------------------------------------------------------|--------|
| A_24_P144499 | 1.0   | -3.7 | -1.1 | -2.8 | PPIAL4A | Homo sapiens peptidylprolyl isomerase A (cyclophilin A)-like 4A (PPIAL4A), mRNA [NM_178230]                     | 164022 |
| A_23_P422724 | -16.8 | 1.0  | 1.0  | 1.1  | PPIC    | Homo sapiens peptidylprolyl isomerase C (cyclophilin C) (PPIC), mRNA [NM_000943]                                | 5480   |
| A_23_P28213  | 2.7   | 2.1  | 2.1  | 2.1  | PPIL3   | Homo sapiens peptidylprolyl isomerase (cyclophilin)-like 3 (PPIL3), transcript variant PPIL3a, mRNA [NM_032472] | 53938  |

|              |      |      |      |      |       |                                                                                                                       |        |
|--------------|------|------|------|------|-------|-----------------------------------------------------------------------------------------------------------------------|--------|
| A_23_P42507  | 1.7  | -1.4 | 2.2  | -1.7 | PPIL4 | Homo sapiens peptidylprolyl isomerase (cyclophilin)-like 4 (PPIL4), mRNA [NM_139126]                                  | 85313  |
| A_24_P925389 | -1.0 | -1.0 | -3.8 | -1.0 | PPIL6 | Homo sapiens peptidylprolyl isomerase (cyclophilin)-like 6, mRNA (cDNA clone IMAGE:4798147), complete cds. [BC026359] | 285755 |
| A_23_P106906 | 1.8  | 1.7  | 1.6  | 2.7  | PPL   | Homo sapiens periplakin (PPL), mRNA [NM_002705]                                                                       | 5493   |

|              |      |      |      |      |       |                                                                                                                                    |      |
|--------------|------|------|------|------|-------|------------------------------------------------------------------------------------------------------------------------------------|------|
| A_24_P688133 | 2.0  | 2.0  | 2.0  | 2.0  | PPM1A | Homo sapiens protein phosphatase, Mg <sup>2+</sup> /Mn <sup>2+</sup> dependent, 1A (PPM1A), transcript variant 1, mRNA [NM_021003] | 5494 |
| A_23_P398073 | -1.2 | -1.6 | -2.8 | 1.1  | PPM1B | Homo sapiens protein phosphatase, Mg <sup>2+</sup> /Mn <sup>2+</sup> dependent, 1B (PPM1B), transcript variant 2, mRNA [NM_177968] | 5495 |
| A_32_P150030 | -1.8 | -1.8 | -1.2 | -2.0 | PPM1D | Homo sapiens protein phosphatase, Mg <sup>2+</sup> /Mn <sup>2+</sup> dependent, 1D (PPM1D), mRNA [NM_003620]                       | 8493 |

|              |      |      |      |      |       |                                                                                                                                                           |        |
|--------------|------|------|------|------|-------|-----------------------------------------------------------------------------------------------------------------------------------------------------------|--------|
| A_23_P49532  | 31.7 | 30.9 | 15.8 | 22.6 | PPM1E | Homo sapiens protein phosphatase, Mg <sup>2+</sup> /Mn <sup>2+</sup> dependent, 1E (PPM1E), mRNA [NM_014906]                                              | 22843  |
| A_24_P214598 | 1.4  | 1.4  | 2.7  | 1.7  | PPM1K | Homo sapiens protein phosphatase, Mg <sup>2+</sup> /Mn <sup>2+</sup> dependent, 1K (PPM1K), nuclear gene encoding mitochondrial protein, mRNA [NM_152542] | 152926 |
| A_32_P429876 | 1.0  | -1.0 | -1.0 | -3.5 | PPM1L | protein phosphatase, Mg <sup>2+</sup> /Mn <sup>2+</sup> dependent, 1L [Source:HGNC Symbol;Acc:16381] [ENST0000498165]                                     | 151742 |

|              |      |      |       |      |       |                                                                                                                                    |        |
|--------------|------|------|-------|------|-------|------------------------------------------------------------------------------------------------------------------------------------|--------|
| A_23_P147563 | 1.0  | -1.1 | -1.1  | -6.6 | PPM1L | Homo sapiens protein phosphatase, Mg <sup>2+</sup> /Mn <sup>2+</sup> dependent, 1L (PPM1L), mRNA [NM_139245]                       | 151742 |
| A_23_P258393 | 1.0  | 1.3  | 2.9   | 1.5  | PPM1M | Homo sapiens protein phosphatase, Mg <sup>2+</sup> /Mn <sup>2+</sup> dependent, 1M (PPM1M), transcript variant 1, mRNA [NM_144641] | 132160 |
| A_24_P4701   | -1.0 | -1.0 | -54.1 | -1.1 | PPME1 | Homo sapiens protein phosphatase methyltransferase 1 (PPME1), mRNA [NM_016147]                                                     | 51400  |

|              |     |     |     |     |      |                                                                                                                                     |      |
|--------------|-----|-----|-----|-----|------|-------------------------------------------------------------------------------------------------------------------------------------|------|
| A_24_P102726 | 2.8 | 2.8 | 2.6 | 2.7 | PPOX | Homo sapiens protoporphyrinogen oxidase (PPOX), nuclear gene encoding mitochondrial protein, transcript variant 1, mRNA [NM_000309] | 5498 |
| A_23_P201400 | 1.6 | 2.3 | 1.4 | 1.7 | PPOX | Homo sapiens protoporphyrinogen oxidase (PPOX), nuclear gene encoding mitochondrial protein, transcript variant 1, mRNA [NM_000309] | 5498 |

|              |      |      |      |       |        |                                                                                                                          |      |
|--------------|------|------|------|-------|--------|--------------------------------------------------------------------------------------------------------------------------|------|
| A_23_P323227 | -4.7 | -1.2 | -3.6 | 1.1   | PPP1CA | Homo sapiens protein phosphatase 1, catalytic subunit, alpha isozyme (PPP1CA), transcript variant 3, mRNA [NM_001008709] | 5499 |
| A_23_P434710 | -1.3 | -2.4 | -1.3 | 1.1   | PPP1CA | Homo sapiens protein phosphatase 1, catalytic subunit, alpha isozyme (PPP1CA), transcript variant 3, mRNA [NM_001008709] | 5499 |
| A_23_P258641 | 3.0  | 3.1  | -1.8 | -16.0 | PPP1CB | Homo sapiens protein phosphatase 1, catalytic subunit, beta isozyme (PPP1CB), transcript variant 1, mRNA [NM_002709]     | 5500 |

|              |      |      |      |      |         |                                                                                                                      |      |
|--------------|------|------|------|------|---------|----------------------------------------------------------------------------------------------------------------------|------|
| A_24_P405298 | -2.0 | -2.0 | -2.0 | -2.1 | PPP1CB  | Homo sapiens protein phosphatase 1, catalytic subunit, beta isozyme (PPP1CB), transcript variant 1, mRNA [NM_002709] | 5500 |
| A_23_P156667 | 1.9  | 4.3  | 4.6  | 3.7  | PPP1R10 | Homo sapiens protein phosphatase 1, regulatory subunit 10 (PPP1R10), mRNA [NM_002714]                                | 5514 |
| A_24_P363315 | 1.7  | 1.9  | 1.1  | -2.1 | PPP1R11 | Homo sapiens protein phosphatase 1, regulatory (inhibitor) subunit 11 (PPP1R11), mRNA [NM_021959]                    | 6992 |



|              |      |      |      |      |          |                                                                                                               |       |
|--------------|------|------|------|------|----------|---------------------------------------------------------------------------------------------------------------|-------|
| A_23_P19437  | 2.5  | 2.5  | 1.6  | -1.8 | PPP1R11  | Homo sapiens protein phosphatase 1, regulatory (inhibitor) subunit 11 (PPP1R11), mRNA [NM_021959]             | 6992  |
| A_23_P12435  | -1.0 | -2.0 | -1.1 | -1.1 | PPP1R12B | Homo sapiens protein phosphatase 1, regulatory subunit 12B (PPP1R12B), transcript variant 3, mRNA [NM_032103] | 4660  |
| A_23_P205273 | 1.7  | 2.2  | 2.0  | -1.2 | PPP1R13B | Homo sapiens protein phosphatase 1, regulatory subunit 13B (PPP1R13B), mRNA [NM_015316]                       | 23368 |

|              |      |      |      |      |          |                                                                                                                   |       |
|--------------|------|------|------|------|----------|-------------------------------------------------------------------------------------------------------------------|-------|
| A_23_P119095 | -1.3 | -1.4 | -2.5 | -2.2 | PPP1R13L | Homo sapiens protein phosphatase 1, regulatory subunit 13 like (PPP1R13L), transcript variant 2, mRNA [NM_006663] | 10848 |
| A_23_P45011  | -4.3 | -4.5 | -5.0 | -4.7 | PPP1R14C | Homo sapiens protein phosphatase 1, regulatory (inhibitor) subunit 14C (PPP1R14C), mRNA [NM_030949]               | 81706 |
| A_23_P90172  | -6.2 | 1.1  | -1.1 | -1.0 | PPP1R15A | Homo sapiens protein phosphatase 1, regulatory subunit 15A (PPP1R15A), mRNA [NM_014330]                           | 23645 |

|              |      |      |      |      |          |                                                                                         |       |
|--------------|------|------|------|------|----------|-----------------------------------------------------------------------------------------|-------|
| A_23_P160449 | -1.2 | 3.0  | 1.4  | 3.2  | PPP1R15B | Homo sapiens protein phosphatase 1, regulatory subunit 15B (PPP1R15B), mRNA [NM_032833] | 84919 |
| A_24_P9605   | 1.6  | -1.2 | 1.4  | 3.3  | PPP1R16A | Homo sapiens protein phosphatase 1, regulatory subunit 16A (PPP1R16A), mRNA [NM_032902] | 84988 |
| A_23_P157715 | 2.3  | -1.1 | -2.1 | -1.1 | PPP1R16A | Homo sapiens protein phosphatase 1, regulatory subunit 16A (PPP1R16A), mRNA [NM_032902] | 84988 |

|              |      |     |       |      |          |                                                                                                                         |       |
|--------------|------|-----|-------|------|----------|-------------------------------------------------------------------------------------------------------------------------|-------|
| A_23_P352535 | -2.4 | 2.2 | 1.3   | -3.5 | PPP1R16B | Homo sapiens protein phosphatase 1, regulatory subunit 16B (PPP1R16B), transcript variant 1, mRNA [NM_015568]           | 26051 |
| A_24_P13285  | 1.6  | 1.0 | -13.2 | 1.0  | PPP1R1A  | Homo sapiens protein phosphatase 1, regulatory (inhibitor) subunit 1A (PPP1R1A), mRNA [NM_006741]                       | 5502  |
| A_23_P129835 | 2.1  | 1.9 | -2.1  | 1.6  | PPP1R1B  | Homo sapiens protein phosphatase 1, regulatory (inhibitor) subunit 1B (PPP1R1B), transcript variant 1, mRNA [NM_032192] | 84152 |

|              |      |      |      |      |         |                                                                                                             |        |
|--------------|------|------|------|------|---------|-------------------------------------------------------------------------------------------------------------|--------|
| A_32_P17133  | 1.1  | 1.1  | -2.0 | 1.8  | PPP1R2  | Homo sapiens protein phosphatase 1, regulatory (inhibitor) subunit 2 (PPP1R2), mRNA [NM_006241]             | 5504   |
| A_23_P90895  | -3.6 | -3.6 | -4.1 | -5.9 | PPP1R21 | Homo sapiens protein phosphatase 1, regulatory subunit 21 (PPP1R21), transcript variant 2, mRNA [NM_152994] | 129285 |
| A_23_P146497 | 2.0  | 1.2  | 1.9  | 1.1  | PPP1R26 | Homo sapiens protein phosphatase 1, regulatory subunit 26 (PPP1R26), mRNA [NM_014811]                       | 9858   |

|              |      |      |      |      |         |                                                                                                                                                          |        |
|--------------|------|------|------|------|---------|----------------------------------------------------------------------------------------------------------------------------------------------------------|--------|
| A_23_P98571  | 1.1  | -4.7 | -1.1 | 1.0  | PPP1R32 | Homo sapiens protein phosphatase 1, regulatory subunit 32 (PPP1R32), nuclear gene encoding mitochondrial protein, transcript variant 1, mRNA [NM_145017] | 220004 |
| A_23_P101303 | -1.0 | -3.0 | -1.1 | -1.1 | PPP1R37 | Homo sapiens protein phosphatase 1, regulatory subunit 37 (PPP1R37), mRNA [NM_019121]                                                                    | 284352 |
| A_24_P324326 | 1.0  | -1.0 | 2.3  | 1.0  | PPP1R37 | Homo sapiens protein phosphatase 1, regulatory subunit 37 (PPP1R37), mRNA [NM_019121]                                                                    | 284352 |

|              |      |      |     |      |         |                                                                                                             |       |
|--------------|------|------|-----|------|---------|-------------------------------------------------------------------------------------------------------------|-------|
| A_23_P216199 | 1.2  | -3.6 | 1.0 | 1.0  | PPP1R3B | Homo sapiens protein phosphatase 1, regulatory subunit 3B (PPP1R3B), transcript variant 2, mRNA [NM_024607] | 79660 |
| A_23_P428640 | 3.1  | 3.0  | 2.7 | 2.8  | PPP1R3E | Homo sapiens protein phosphatase 1, regulatory subunit 3E (PPP1R3E), non-coding RNA [NR_026862]             | 90673 |
| A_23_P125533 | -1.1 | -4.9 | 1.1 | -2.8 | PPP1R3F | Homo sapiens protein phosphatase 1, regulatory subunit 3F (PPP1R3F), transcript variant 1, mRNA [NM_033215] | 89801 |

|              |      |       |      |      |         |                                                                                                             |        |
|--------------|------|-------|------|------|---------|-------------------------------------------------------------------------------------------------------------|--------|
| A_23_P125541 | -1.2 | 1.7   | 2.4  | 2.4  | PPP1R3F | Homo sapiens protein phosphatase 1, regulatory subunit 3F (PPP1R3F), transcript variant 1, mRNA [NM_033215] | 89801  |
| A_23_P257063 | -9.5 | -1.0  | -1.1 | 1.0  | PPP1R42 | leucine rich repeat containing 67 [Source:HGNC Symbol;Acc:33732] [ENST0000421742]                           | 286187 |
| A_23_P154199 | -1.2 | -11.5 | -1.4 | -1.5 | PPP1R7  | Homo sapiens protein phosphatase 1, regulatory subunit 7 (PPP1R7), mRNA [NM_002712]                         | 5510   |



|              |     |     |      |      |         |                                                                                                                   |      |
|--------------|-----|-----|------|------|---------|-------------------------------------------------------------------------------------------------------------------|------|
| A_23_P308097 | 1.1 | 1.0 | -3.5 | -3.1 | PPP2CB  | Homo sapiens protein phosphatase 2, catalytic subunit, beta isozyme (PPP2CB), mRNA [NM_001009552]                 | 5516 |
| A_23_P107661 | 3.1 | 3.8 | 1.2  | 2.2  | PPP2R1A | Homo sapiens protein phosphatase 2, regulatory subunit A, alpha (PPP2R1A), transcript variant 1, mRNA [NM_014225] | 5518 |
| A_24_P107291 | 2.5 | 2.3 | 1.9  | -1.8 | PPP2R1B | Homo sapiens protein phosphatase 2, regulatory subunit A, beta (PPP2R1B), transcript variant 2, mRNA [NM_181699]  | 5519 |

|              |      |      |      |      |         |                                                                                                                   |      |
|--------------|------|------|------|------|---------|-------------------------------------------------------------------------------------------------------------------|------|
| A_23_P52793  | 1.0  | -1.7 | 2.1  | -2.8 | PPP2R1B | Homo sapiens protein phosphatase 2, regulatory subunit A, beta (PPP2R1B), transcript variant 1, mRNA [NM_002716]  | 5519 |
| A_23_P123539 | -3.4 | 4.0  | 4.2  | 3.3  | PPP2R2A | Homo sapiens protein phosphatase 2, regulatory subunit B, alpha (PPP2R2A), transcript variant 1, mRNA [NM_002717] | 5520 |
| A_24_P346644 | -5.7 | 1.0  | -1.1 | 1.1  | PPP2R2A | Homo sapiens protein phosphatase 2, regulatory subunit B, alpha (PPP2R2A), transcript variant 1, mRNA [NM_002717] | 5520 |

|              |      |      |      |      |         |                                                                                                                    |       |
|--------------|------|------|------|------|---------|--------------------------------------------------------------------------------------------------------------------|-------|
| A_24_P3415   | -1.3 | -1.2 | -3.5 | -1.3 | PPP2R2C | Homo sapiens protein phosphatase 2, regulatory subunit B, gamma (PPP2R2C), transcript variant 2, mRNA [NM_181876]  | 5522  |
| A_23_P135778 | 3.2  | -1.1 | 1.2  | 2.3  | PPP2R2D | Homo sapiens protein phosphatase 2, regulatory subunit B, delta (PPP2R2D), transcript variant 1, mRNA [NM_018461]  | 55844 |
| A_23_P10401  | 1.0  | 1.8  | -1.1 | -2.5 | PPP2R3A | Homo sapiens protein phosphatase 2, regulatory subunit B", alpha (PPP2R3A), transcript variant 1, mRNA [NM_002718] | 5523  |

|              |     |     |     |     |         |                                                                                                                      |       |
|--------------|-----|-----|-----|-----|---------|----------------------------------------------------------------------------------------------------------------------|-------|
| A_23_P45517  | 1.4 | 3.3 | 1.4 | 2.5 | PPP2R3B | Homo sapiens protein phosphatase 2, regulatory subunit B'', beta (PPP2R3B), mRNA [NM_013239]                         | 28227 |
| A_23_P60458  | 1.4 | 3.5 | 3.0 | 1.2 | PPP2R4  | Homo sapiens protein phosphatase 2A activator, regulatory subunit 4 (PPP2R4), transcript variant 1, mRNA [NM_178001] | 5524  |
| A_23_P256432 | 1.7 | 1.8 | 1.6 | 2.0 | PPP2R5A | Homo sapiens protein phosphatase 2, regulatory subunit B', alpha (PPP2R5A), transcript variant 1, mRNA [NM_006243]   | 5525  |

|              |     |     |     |     |         |                                                                                                     |      |
|--------------|-----|-----|-----|-----|---------|-----------------------------------------------------------------------------------------------------|------|
| A_23_P35796  | 2.0 | 1.9 | 1.8 | 1.8 | PPP2R5B | Homo sapiens protein phosphatase 2, regulatory subunit B', beta (PPP2R5B), mRNA [NM_006244]         | 5526 |
| A_24_P76898  | 1.2 | 2.6 | 5.9 | 3.0 | PPP2R5C | protein phosphatase 2, regulatory subunit B', gamma [Source:HGNC Symbol;Acc:9311] [ENST00000556068] | 5527 |
| A_24_P341370 | 3.4 | 2.5 | 1.4 | 1.1 | PPP2R5C | protein phosphatase 2, regulatory subunit B', gamma [Source:HGNC Symbol;Acc:9311] [ENST00000556068] | 5527 |

|              |      |     |      |     |         |                                                                                                               |      |
|--------------|------|-----|------|-----|---------|---------------------------------------------------------------------------------------------------------------|------|
| A_24_P5026   | -3.5 | 1.0 | -1.0 | 1.0 | PPP2R5E | protein phosphatase 2, regulatory subunit B', epsilon isoform [Source:HGNC Symbol;Acc:9313] [ENST00000337537] | 5529 |
| A_23_P9348   | 1.6  | 3.9 | 1.5  | 1.1 | PPP3R2  | Homo sapiens protein phosphatase 3, regulatory subunit B, beta (PPP3R2), mRNA [NM_147180]                     | 5535 |
| A_24_P271014 | 1.9  | 2.7 | -3.2 | 1.0 | PPP4R1  | Homo sapiens protein phosphatase 4, regulatory subunit 1 (PPP4R1), transcript variant 1, mRNA [NM_001042388]  | 9989 |

|              |      |     |      |      |         |                                                                                                     |        |
|--------------|------|-----|------|------|---------|-----------------------------------------------------------------------------------------------------|--------|
| A_24_P65851  | 1.1  | 1.1 | -2.6 | 1.1  | PPP4R1L | Homo sapiens protein phosphatase 4, regulatory subunit 1-like (PPP4R1L), non-coding RNA [NR_003505] | 55370  |
| A_24_P400729 | 4.0  | 3.9 | 3.5  | 3.6  | PPP4R2  | Homo sapiens protein phosphatase 4, regulatory subunit 2 (PPP4R2), mRNA [NM_174907]                 | 151987 |
| A_32_P228775 | -1.2 | 1.3 | -1.7 | -3.3 | PPP4R2  | Homo sapiens protein phosphatase 4, regulatory subunit 2 (PPP4R2), mRNA [NM_174907]                 | 151987 |

|              |      |      |      |       |        |                                                                                                           |       |
|--------------|------|------|------|-------|--------|-----------------------------------------------------------------------------------------------------------|-------|
| A_24_P186174 | -3.0 | 2.9  | 2.6  | 1.0   | PPP6R2 | Homo sapiens protein phosphatase 6, regulatory subunit 2 (PPP6R2), transcript variant 3, mRNA [NM_014678] | 9701  |
| A_24_P922808 | -1.4 | -4.0 | 1.1  | 1.7   | PPPDE1 | PPPDE peptidase domain containing 1 [Source:HGNC Symbol;Acc:24264] [ENST00000484738]                      | 51029 |
| A_23_P201445 | -1.0 | -1.0 | 1.0  | -17.3 | PPPDE1 | Homo sapiens PPPDE peptidase domain containing 1 (PPPDE1), mRNA [NM_016076]                               | 51029 |
| A_23_P356330 | 3.7  | 5.2  | -1.5 | 1.3   | PPPDE2 | Homo sapiens PPPDE peptidase domain containing 2 (PPPDE2), mRNA [NM_015704]                               | 27351 |



|              |      |      |      |      |        |                                                                                                   |        |
|--------------|------|------|------|------|--------|---------------------------------------------------------------------------------------------------|--------|
| A_23_P68966  | 1.0  | -1.0 | -4.1 | -1.1 | PPPDE2 | Homo sapiens PPPDE peptidase domain containing 2 (PPPDE2), mRNA [NM_015704]                       | 27351  |
| A_23_P306933 | -1.6 | -2.3 | -2.5 | -3.3 | PPTC7  | Homo sapiens PTC7 protein phosphatase homolog (S. cerevisiae) (PPTC7), mRNA [NM_139283]           | 160760 |
| A_23_P110433 | 1.9  | 2.2  | 1.7  | 1.1  | PPWD1  | Homo sapiens peptidylprolyl isomerase domain and WD repeat containing 1 (PPWD1), mRNA [NM_015342] | 23398  |

|              |      |     |       |       |        |                                                                                                 |       |
|--------------|------|-----|-------|-------|--------|-------------------------------------------------------------------------------------------------|-------|
| A_23_P62139  | 1.1  | 1.0 | -17.9 | 1.1   | PQBP1  | Homo sapiens polyglutamine binding protein 1 (PQBP1), transcript variant 8, mRNA [NM_001167989] | 10084 |
| A_23_P405239 | 3.2  | 1.4 | 1.6   | 2.2   | PQLC2  | Homo sapiens cDNA FLJ20320 fis, clone HEP08923. [AK000327]                                      | 54896 |
| A_23_P131596 | 2.1  | 1.3 | -1.3  | 2.5   | PRADC1 | Homo sapiens protease-associated domain containing 1 (PRADC1), mRNA [NM_032319]                 | 84279 |
| A_23_P96350  | -1.2 | 1.2 | 1.1   | -10.0 | PRAF2  | Homo sapiens PRA1 domain family, member 2 (PRAF2), mRNA [NM_007213]                             | 11230 |

|              |      |      |      |      |       |                                                                                                           |       |
|--------------|------|------|------|------|-------|-----------------------------------------------------------------------------------------------------------|-------|
| A_23_P165219 | 1.1  | -1.6 | -2.1 | 1.4  | PRAM1 | Homo sapiens PML-RARA regulated adaptor molecule 1 (PRAM1), mRNA [NM_032152]                              | 84106 |
| A_23_P166360 | -2.5 | 1.0  | -1.1 | -1.1 | PRAME | Homo sapiens preferentially expressed antigen in melanoma (PRAME), transcript variant 5, mRNA [NM_206956] | 23532 |
| A_24_P216361 | -4.0 | -1.0 | -1.1 | -1.1 | PRAME | Homo sapiens preferentially expressed antigen in melanoma (PRAME), transcript variant 5, mRNA [NM_206956] | 23532 |

|              |      |      |      |      |         |                                                                                                    |        |
|--------------|------|------|------|------|---------|----------------------------------------------------------------------------------------------------|--------|
| A_23_P126658 | -5.5 | 1.0  | -1.1 | -1.0 | PRAMEF8 | Homo sapiens PRAME family member 8 (PRAMEF8), mRNA [NM_001012276]                                  | 391002 |
| A_23_P128263 | 4.0  | 1.8  | 1.3  | 3.7  | PRB1    | Homo sapiens proline-rich protein BstNI subfamily 1 (PRB1), transcript variant 1, mRNA [NM_005039] | 5542   |
| A_23_P139434 | -1.0 | -1.0 | -2.3 | -1.1 | PRB2    | Homo sapiens proline-rich protein BstNI subfamily 2 (PRB2), mRNA [NM_006248]                       | 653247 |
| A_23_P116890 | 3.4  | 2.9  | 1.5  | 1.5  | PRB3    | Homo sapiens proline-rich protein BstNI subfamily 3 (PRB3), mRNA [NM_006249]                       | 5544   |

|              |      |      |      |      |        |                                                                                                 |       |
|--------------|------|------|------|------|--------|-------------------------------------------------------------------------------------------------|-------|
| A_23_P116872 | 2.0  | 1.7  | 2.6  | -1.3 | PRB4   | Homo sapiens proline-rich protein BstNI subfamily 4 (PRB4), mRNA [NM_002723]                    | 5545  |
| A_23_P23411  | 1.8  | 2.7  | 1.8  | 1.5  | PRCC   | Homo sapiens papillary renal cell carcinoma (translocation-associated) (PRCC), mRNA [NM_005973] | 5546  |
| A_32_P228699 | -4.5 | -1.8 | -1.2 | -1.2 | PRDM10 | Homo sapiens PR domain containing 10 (PRDM10), transcript variant 2, mRNA [NM_199437]           | 56980 |
| A_24_P9833   | 1.6  | -5.3 | -2.6 | -1.1 | PRDM11 | Homo sapiens PR domain containing 11 (PRDM11), mRNA [NM_020229]                                 | 56981 |

|              |     |       |      |     |        |                                                                                       |       |
|--------------|-----|-------|------|-----|--------|---------------------------------------------------------------------------------------|-------|
| A_23_P13057  | 1.4 | 1.4   | 2.2  | 1.4 | PRDM11 | Homo sapiens PR domain containing 11 (PRDM11), mRNA [NM_020229]                       | 56981 |
| A_23_P43317  | 6.4 | 6.5   | 6.2  | 1.1 | PRDM12 | Homo sapiens PR domain containing 12 (PRDM12), mRNA [NM_021619]                       | 59335 |
| A_23_P123488 | 1.3 | -19.3 | -1.3 | 1.0 | PRDM14 | Homo sapiens PR domain containing 14 (PRDM14), mRNA [NM_024504]                       | 63978 |
| A_32_P225816 | 1.0 | -2.3  | -1.0 | 1.3 | PRDM16 | Homo sapiens PR domain containing 16 (PRDM16), transcript variant 1, mRNA [NM_022114] | 63976 |

|              |      |     |      |     |       |                                                                                                                           |       |
|--------------|------|-----|------|-----|-------|---------------------------------------------------------------------------------------------------------------------------|-------|
| A_23_P117146 | -1.0 | 1.4 | 2.2  | 2.1 | PRDM4 | Homo sapiens PR domain containing 4 (PRDM4), mRNA [NM_012406]                                                             | 11108 |
| A_23_P7612   | 2.1  | 2.8 | 2.3  | 2.3 | PRDM9 | Homo sapiens PR domain containing 9 (PRDM9), mRNA [NM_020227]                                                             | 56979 |
| A_24_P168416 | -1.2 | 1.6 | -2.6 | 1.4 | PRDX2 | Homo sapiens peroxiredoxin 2 (PRDX2), nuclear gene encoding mitochondrial protein, transcript variant 3, mRNA [NM_181738] | 7001  |

|              |      |      |      |      |       |                                                                                                                           |       |
|--------------|------|------|------|------|-------|---------------------------------------------------------------------------------------------------------------------------|-------|
| A_23_P142045 | -1.6 | -3.0 | -3.3 | -5.7 | PRDX2 | Homo sapiens peroxiredoxin 2 (PRDX2), nuclear gene encoding mitochondrial protein, transcript variant 1, mRNA [NM_005809] | 7001  |
| A_24_P155378 | 21.1 | 21.3 | 20.1 | 11.9 | PRDX5 | Homo sapiens peroxiredoxin 5 (PRDX5), nuclear gene encoding mitochondrial protein, transcript variant 1, mRNA [NM_012094] | 25824 |
| A_23_P91114  | -3.6 | -1.0 | 1.6  | 1.7  | PREB  | Homo sapiens prolactin regulatory element binding (PREB), mRNA [NM_013388]                                                | 10113 |



|              |     |      |      |      |       |                                                                                                                    |       |
|--------------|-----|------|------|------|-------|--------------------------------------------------------------------------------------------------------------------|-------|
| A_23_P51499  | 1.6 | -1.3 | 1.9  | -2.4 | PRELP | Homo sapiens proline/arginine-rich end leucine-rich repeat protein (PRELP), transcript variant 1, mRNA [NM_002725] | 5549  |
| A_23_P165325 | 2.1 | 1.6  | 1.1  | -1.1 | PREPL | Homo sapiens prolyl endopeptidase-like (PREPL), transcript variant 1, mRNA [NM_006036]                             | 9581  |
| A_23_P413641 | 1.1 | -2.5 | -2.7 | 1.1  | PREX1 | Homo sapiens phosphatidylinositol-3,4,5-trisphosphate-dependent Rac exchange factor 1 (PREX1), mRNA [NM_020820]    | 57580 |

|              |      |      |      |      |       |                                                                                                                                                                 |       |
|--------------|------|------|------|------|-------|-----------------------------------------------------------------------------------------------------------------------------------------------------------------|-------|
| A_23_P134887 | 2.6  | 3.3  | 2.0  | 2.3  | PREX2 | phosphatidylinositol-3,4,5-trisphosphate-dependent Rac exchange factor 2 [Source:HGNC Symbol;Acc:22950] [ENST00000529398]                                       | 80243 |
| A_23_P1473   | 1.1  | -1.8 | 2.2  | 2.1  | PRF1  | Homo sapiens perforin 1 (pore forming protein) (PRF1), transcript variant 1, mRNA [NM_005041]                                                                   | 5551  |
| A_23_P218002 | -1.3 | -4.0 | -1.0 | -1.0 | PRG2  | Homo sapiens proteoglycan 2, bone marrow (natural killer cell activator, eosinophil granule major basic protein) (PRG2), transcript variant 1, mRNA [NM_002728] | 5553  |

|              |      |     |       |      |          |                                                                                                                                      |       |
|--------------|------|-----|-------|------|----------|--------------------------------------------------------------------------------------------------------------------------------------|-------|
| A_23_P160286 | -4.8 | 2.5 | -12.5 | 2.1  | PRG4     | Homo sapiens proteoglycan 4 (PRG4), transcript variant A, mRNA [NM_005807]                                                           | 10216 |
| A_24_P79199  | 2.4  | 3.1 | 3.9   | -1.0 | PRIC285  | Homo sapiens peroxisomal proliferator-activated receptor A interacting complex 285 (PRIC285), transcript variant 2, mRNA [NM_033405] | 85441 |
| A_24_P106502 | 2.2  | 1.8 | 1.8   | 1.8  | PRICKLE4 | Homo sapiens prickle homolog 4 (Drosophila) (PRICKLE4), mRNA [NM_013397]                                                             | 29964 |

|              |     |      |      |      |        |                                                                                                     |      |
|--------------|-----|------|------|------|--------|-----------------------------------------------------------------------------------------------------|------|
| A_23_P60811  | 2.4 | 2.7  | 2.3  | -1.3 | PRKAA2 | Homo sapiens protein kinase, AMP-activated, alpha 2 catalytic subunit (PRKAA2), mRNA [NM_006252]    | 5563 |
| A_23_P52109  | 1.0 | -4.3 | -1.0 | 1.7  | PRKAA2 | Homo sapiens protein kinase, AMP-activated, alpha 2 catalytic subunit (PRKAA2), mRNA [NM_006252]    | 5563 |
| A_23_P204503 | 1.7 | 1.7  | 1.7  | -3.4 | PRKAB1 | Homo sapiens protein kinase, AMP-activated, beta 1 non-catalytic subunit (PRKAB1), mRNA [NM_006253] | 5564 |

|              |      |      |      |      |        |                                                                                                                |      |
|--------------|------|------|------|------|--------|----------------------------------------------------------------------------------------------------------------|------|
| A_23_P350704 | 1.2  | -1.4 | -2.3 | -1.8 | PRKAB2 | Homo sapiens protein kinase, AMP-activated, beta 2 non-catalytic subunit (PRKAB2), mRNA [NM_005399]            | 5565 |
| A_24_P399630 | 2.2  | 1.3  | 1.1  | -1.8 | PRKACA | Homo sapiens protein kinase, cAMP-dependent, catalytic, alpha (PRKACA), transcript variant 1, mRNA [NM_002730] | 5566 |
| A_24_P408206 | -1.0 | -1.1 | 1.4  | -7.2 | PRKACA | Homo sapiens protein kinase, cAMP-dependent, catalytic, alpha (PRKACA), transcript variant 1, mRNA [NM_002730] | 5566 |

|              |      |     |      |      |        |                                                                                                                               |      |
|--------------|------|-----|------|------|--------|-------------------------------------------------------------------------------------------------------------------------------|------|
| A_23_P371410 | -2.0 | 1.9 | 2.5  | 3.0  | PRKACB | Homo sapiens protein kinase, cAMP-dependent, catalytic, beta (PRKACB), transcript variant 3, mRNA [NM_207578]                 | 5567 |
| A_24_P62708  | 3.4  | 3.1 | 3.0  | 3.2  | PRKACB | Homo sapiens protein kinase, cAMP-dependent, catalytic, beta (PRKACB), transcript variant 2, mRNA [NM_002731]                 | 5567 |
| A_23_P36513  | 1.3  | 2.2 | -4.0 | -1.3 | PRKAG1 | Homo sapiens protein kinase, AMP-activated, gamma 1 non-catalytic subunit (PRKAG1), transcript variant 4, mRNA [NM_001206710] | 5571 |

|              |      |      |      |      |         |                                                                                                                         |        |
|--------------|------|------|------|------|---------|-------------------------------------------------------------------------------------------------------------------------|--------|
| A_24_P216501 | -1.6 | 3.2  | -2.9 | 3.2  | PRKAR1B | Homo sapiens protein kinase, cAMP-dependent, regulatory, type I, beta (PRKAR1B), transcript variant 2, mRNA [NM_002735] | 5575   |
| A_23_P203475 | 2.0  | 2.3  | 1.8  | 2.1  | PRKCDBP | Homo sapiens protein kinase C, delta binding protein (PRKCDBP), mRNA [NM_145040]                                        | 112464 |
| A_23_P348194 | -1.4 | -1.3 | -2.8 | -1.4 | PRKCE   | Homo sapiens protein kinase C, epsilon (PRKCE), mRNA [NM_005400]                                                        | 5581   |
| A_23_P16189  | 3.8  | 2.8  | 1.3  | 2.4  | PRKCG   | Homo sapiens protein kinase C, gamma (PRKCG), mRNA [NM_002739]                                                          | 5582   |

|              |      |      |      |      |       |                                                                                                    |      |
|--------------|------|------|------|------|-------|----------------------------------------------------------------------------------------------------|------|
| A_23_P205567 | 8.7  | 7.5  | 10.2 | 7.1  | PRKCH | Homo sapiens protein kinase C, eta (PRKCH), mRNA [NM_006255]                                       | 5583 |
| A_24_P937915 | 2.2  | 1.3  | 1.6  | 6.9  | PRKCH | PKC- eta b=protein kinase C eta b [human, monoblastoid U937 cells, mRNA Partial, 306 nt]. [S74620] | 5583 |
| A_24_P461118 | -1.6 | -1.7 | -3.0 | -1.9 | PRKCI | Homo sapiens protein kinase C, iota (PRKCI), mRNA [NM_002740]                                      | 5584 |
| A_23_P18392  | 1.0  | -5.4 | 1.0  | 1.0  | PRKCI | Homo sapiens protein kinase C, iota (PRKCI), mRNA [NM_002740]                                      | 5584 |



|              |      |      |      |      |        |                                                                                                |       |
|--------------|------|------|------|------|--------|------------------------------------------------------------------------------------------------|-------|
| A_24_P396197 | 1.1  | 1.1  | -1.7 | 2.3  | PRKCSH | Homo sapiens protein kinase C substrate 80K-H (PRKCSH), transcript variant 1, mRNA [NM_002743] | 5589  |
| A_24_P924462 | 2.8  | 1.4  | -1.0 | 1.4  | PRKCZ  | Homo sapiens mRNA, chromosome 1 specific transcript KIAA0505. [AB007974]                       | 5590  |
| A_23_P78802  | -1.1 | -1.2 | 1.3  | -2.3 | PRKD2  | Homo sapiens protein kinase D2 (PRKD2), transcript variant 1, mRNA [NM_016457]                 | 25865 |
| A_24_P162911 | -2.6 | -1.0 | -1.1 | -1.0 | PRKD3  | Homo sapiens protein kinase D3 (PRKD3), mRNA [NM_005813]                                       | 23683 |

|              |      |      |      |      |       |                                                                                                                   |      |
|--------------|------|------|------|------|-------|-------------------------------------------------------------------------------------------------------------------|------|
| A_32_P25204  | -2.7 | 1.0  | -1.2 | -1.4 | PRKDC | Homo sapiens protein kinase, DNA-activated, catalytic polypeptide (PRKDC), transcript variant 1, mRNA [NM_006904] | 5591 |
| A_23_P158811 | -1.4 | -2.9 | -1.5 | -1.5 | PRKG1 | Homo sapiens protein kinase, cGMP-dependent, type I (PRKG1), transcript variant 2, mRNA [NM_006258]               | 5592 |
| A_24_P250765 | -1.0 | -4.8 | -1.0 | 1.0  | PRKG1 | Homo sapiens protein kinase, cGMP-dependent, type I (PRKG1), transcript variant 2, mRNA [NM_006258]               | 5592 |

|              |      |      |      |      |        |                                                                                                                                                            |       |
|--------------|------|------|------|------|--------|------------------------------------------------------------------------------------------------------------------------------------------------------------|-------|
| A_23_P69663  | -2.2 | 1.3  | -1.7 | 1.2  | PRKG2  | Homo sapiens protein kinase, cGMP-dependent, type II (PRKG2), mRNA [NM_006259]                                                                             | 5593  |
| A_23_P203686 | 1.1  | -1.3 | -1.0 | -6.0 | PRKRIR | protein-kinase, interferon-inducible double stranded RNA dependent inhibitor, repressor of (P58 repressor) [Source:HGNC Symbol;Acc:9440] [ENST00000260045] | 5612  |
| A_23_P143006 | 3.2  | 4.2  | 1.9  | 2.9  | PRLH   | Homo sapiens prolactin releasing hormone (PRLH), mRNA [NM_015893]                                                                                          | 51052 |
| A_23_P305470 | -4.0 | 1.3  | 1.4  | -2.7 | PRM3   | Homo sapiens protamine 3 (PRM3), mRNA [NM_021247]                                                                                                          | 58531 |

|              |      |      |      |      |       |                                                                                                      |       |
|--------------|------|------|------|------|-------|------------------------------------------------------------------------------------------------------|-------|
| A_24_P298420 | -1.9 | -2.3 | -2.3 | -1.3 | PRMT5 | Homo sapiens protein arginine methyltransferase 5 (PRMT5), transcript variant 2, mRNA [NM_001039619] | 10419 |
| A_23_P77437  | 1.0  | -1.0 | -2.4 | -1.0 | PRMT7 | Homo sapiens protein arginine methyltransferase 7 (PRMT7), transcript variant 1, mRNA [NM_019023]    | 54496 |
| A_23_P77430  | 4.8  | 5.1  | 4.1  | -1.5 | PRMT7 | Homo sapiens protein arginine methyltransferase 7 (PRMT7), transcript variant 1, mRNA [NM_019023]    | 54496 |
| A_23_P139740 | 1.0  | -1.4 | -2.0 | -1.1 | PRMT8 | Homo sapiens protein arginine methyltransferase 8 (PRMT8), mRNA [NM_019854]                          | 56341 |

|              |      |      |      |      |       |                                                                                                                                             |        |
|--------------|------|------|------|------|-------|---------------------------------------------------------------------------------------------------------------------------------------------|--------|
| A_24_P927041 | 2.2  | 1.0  | 2.0  | 2.0  | PRND  | Homo sapiens prion protein 2 (dublet) (PRND), mRNA [NM_012409]                                                                              | 23627  |
| A_24_P348828 | -5.4 | -1.0 | -1.1 | -1.1 | PRNT  | Homo sapiens prion protein (testis specific) (PRNT), transcript variant 1, non-coding RNA [NR_024267]                                       | 149830 |
| A_23_P68786  | -7.0 | -1.8 | -1.4 | -1.1 | PRODH | Homo sapiens proline dehydrogenase (oxidase) 1 (PRODH), nuclear gene encoding mitochondrial protein, transcript variant 1, mRNA [NM_016335] | 5625   |

|              |      |      |      |      |           |                                                                         |        |
|--------------|------|------|------|------|-----------|-------------------------------------------------------------------------|--------|
| A_24_P402855 | 1.0  | -2.1 | 1.0  | 1.2  | PROL1     | Homo sapiens proline rich, lacrimal 1 (PROL1), mRNA [NM_021225]         | 58503  |
| A_23_P154358 | 2.0  | -1.6 | -1.2 | 1.6  | PROM2     | Homo sapiens prominin 2 (PROM2), transcript variant 3, mRNA [NM_144707] | 150696 |
| A_23_P135848 | 2.3  | 1.2  | 1.2  | 1.0  | PROP1     | Homo sapiens PROP paired-like homeobox 1 (PROP1), mRNA [NM_006261]      | 5626   |
| A_23_P73114  | 1.6  | 1.6  | 1.8  | -2.3 | PROS1     | Homo sapiens protein S (alpha) (PROS1), mRNA [NM_000313]                | 5627   |
| A_23_P380298 | -1.2 | -2.3 | -1.4 | -2.9 | ProSAPiP1 | Homo sapiens ProSAPiP1 protein (ProSAPiP1), mRNA [NM_014731]            | 9762   |

|              |      |      |      |      |        |                                                                                                              |       |
|--------------|------|------|------|------|--------|--------------------------------------------------------------------------------------------------------------|-------|
| A_23_P45166  | -5.4 | -1.3 | -1.3 | -1.3 | PROSC  | Homo sapiens proline synthetase co-transcribed homolog (bacterial) (PROSC), mRNA [NM_007198]                 | 11212 |
| A_23_P140074 | -3.4 | 1.0  | -3.2 | -1.0 | PROZ   | Homo sapiens protein Z, vitamin K-dependent plasma glycoprotein (PROZ), mRNA [NM_003891]                     | 8858  |
| A_32_P59811  | 1.6  | 2.2  | -1.4 | -1.4 | PRPF18 | PRP18 pre-mRNA processing factor 18 homolog (S. cerevisiae) [Source:HGNC Symbol;Acc:17351] [ENST00000320054] | 8559  |

|              |      |      |      |      |         |                                                                                                                                 |       |
|--------------|------|------|------|------|---------|---------------------------------------------------------------------------------------------------------------------------------|-------|
| A_23_P142022 | -2.1 | -3.1 | -3.3 | -1.3 | PRPF31  | Homo sapiens PRP31 pre-mRNA processing factor 31 homolog (S. cerevisiae) (PRPF31), mRNA [NM_015629]                             | 26121 |
| A_23_P60537  | 1.4  | -2.5 | 1.3  | 1.0  | PRPF4   | Homo sapiens PRP4 pre-mRNA processing factor 4 homolog (yeast) (PRPF4), transcript variant 1, mRNA [NM_004697]                  | 9128  |
| A_23_P411922 | 2.1  | 1.3  | 2.1  | 1.2  | PRPF40B | Homo sapiens PRP40 pre-mRNA processing factor 40 homolog B (S. cerevisiae) (PRPF40B), transcript variant 1, mRNA [NM_001031698] | 25766 |



|              |      |      |      |      |         |                                                                                                  |        |
|--------------|------|------|------|------|---------|--------------------------------------------------------------------------------------------------|--------|
| A_32_P402521 | -1.9 | -1.8 | -2.5 | -1.6 | PRPF8   | Homo sapiens PRP8 pre-mRNA processing factor 8 homolog (S. cerevisiae) (PRPF8), mRNA [NM_006445] | 10594  |
| A_32_P192823 | 4.2  | 3.8  | 1.2  | 2.1  | PRPS1L1 | Homo sapiens phosphoribosyl pyrophosphate synthetase 1-like 1 (PRPS1L1), mRNA [NM_175886]        | 221823 |
| A_23_P207307 | -1.0 | -1.0 | -4.9 | -4.2 | PRR11   | Homo sapiens cDNA FLJ11029 fis, clone PLACE1004156. [AK001891]                                   | 55771  |
| A_23_P55948  | -4.4 | 3.3  | 1.6  | -1.1 | PRR12   | Homo sapiens proline rich 12 (PRR12), mRNA [NM_020719]                                           | 57479  |

|              |      |      |      |       |       |                                                                                 |        |
|--------------|------|------|------|-------|-------|---------------------------------------------------------------------------------|--------|
| A_24_P73178  | -1.2 | -2.9 | -2.2 | -1.3  | PRR13 | Homo sapiens proline rich 13 (PRR13), transcript variant 3, mRNA [NM_001005354] | 54458  |
| A_24_P349466 | -1.1 | 1.0  | -3.7 | -1.3  | PRR13 | Homo sapiens proline rich 13 (PRR13), transcript variant 3, mRNA [NM_001005354] | 54458  |
| A_23_P49412  | 1.7  | 2.1  | 1.4  | 1.5   | PRR14 | Homo sapiens proline rich 14 (PRR14), mRNA [NM_024031]                          | 78994  |
| A_23_P431346 | 2.2  | 1.9  | 1.6  | 2.1   | PRR15 | Homo sapiens proline rich 15 (PRR15), mRNA [NM_175887]                          | 222171 |
| A_23_P92929  | 1.4  | 1.4  | 1.3  | -41.7 | PRR16 | Homo sapiens proline rich 16 (PRR16), mRNA [NM_016644]                          | 51334  |

|              |      |      |      |      |       |                                                                                    |        |
|--------------|------|------|------|------|-------|------------------------------------------------------------------------------------|--------|
| A_24_P178300 | 2.0  | 1.5  | 2.0  | -2.9 | PRR21 | Homo sapiens proline rich 21 (PRR21), mRNA [NM_001080835]                          | 643905 |
| A_23_P372988 | -1.0 | -2.9 | 1.0  | -1.0 | PRR22 | Homo sapiens proline rich 22 (PRR22), mRNA [NM_001134316]                          | 163154 |
| A_23_P386168 | -2.1 | -1.1 | 1.9  | 2.2  | PRR24 | Homo sapiens proline rich 24 (PRR24), transcript variant 1, mRNA [NM_178511]       | 255783 |
| A_24_P106454 | 1.3  | 1.2  | -2.8 | 3.1  | PRR3  | Homo sapiens proline rich 3 (PRR3), transcript variant 1, mRNA [NM_025263]         | 80742  |
| A_24_P10890  | -1.9 | -2.5 | -2.6 | -2.2 | PRR5  | Homo sapiens proline rich 5 (renal) (PRR5), transcript variant 2, mRNA [NM_015366] | 55615  |

|              |      |      |      |      |        |                                                                                           |       |
|--------------|------|------|------|------|--------|-------------------------------------------------------------------------------------------|-------|
| A_24_P20807  | -3.6 | -1.5 | -9.9 | -1.2 | PRR7   | Homo sapiens proline rich 7 (synaptic) (PRR7), transcript variant 1, mRNA [NM_030567]     | 80758 |
| A_23_P30464  | -1.3 | -1.4 | -3.9 | -1.4 | PRR7   | Homo sapiens proline rich 7 (synaptic) (PRR7), transcript variant 1, mRNA [NM_030567]     | 80758 |
| A_24_P641130 | 1.9  | 2.2  | 1.9  | 1.3  | PRRC2A | Homo sapiens proline-rich coiled-coil 2A (PRRC2A), transcript variant 1, mRNA [NM_080686] | 7916  |
| A_23_P30870  | -2.3 | -3.1 | -4.5 | -2.6 | PRRC2A | proline-rich coiled-coil 2A [Source:HGNC Symbol;Acc:13918] [ENST00000464106]              | 7916  |

|              |      |      |      |      |        |                                                                                                                          |       |
|--------------|------|------|------|------|--------|--------------------------------------------------------------------------------------------------------------------------|-------|
| A_23_P123578 | 1.9  | 1.6  | 2.3  | 2.0  | PRRC2B | Homo sapiens proline-rich coiled-coil 2B (PRRC2B), mRNA [NM_013318]                                                      | 84726 |
| A_23_P67355  | 1.2  | -3.0 | 1.4  | 1.0  | PRRG2  | Homo sapiens proline rich Gla (G-carboxyglutamic acid) 2 (PRRG2), mRNA [NM_000951]                                       | 5639  |
| A_23_P387537 | 1.4  | 1.1  | 2.1  | -1.2 | PRRG3  | Homo sapiens proline rich Gla (G-carboxyglutamic acid) 3 (transmembrane) (PRRG3), transcript variant 1, mRNA [NM_024082] | 79057 |
| A_23_P127663 | -4.9 | 1.8  | -2.4 | -1.5 | PRRG4  | Homo sapiens proline rich Gla (G-carboxyglutamic acid) 4 (transmembrane) (PRRG4), mRNA [NM_024081]                       | 79056 |

|              |      |      |      |       |        |                                                                             |       |
|--------------|------|------|------|-------|--------|-----------------------------------------------------------------------------|-------|
| A_32_P192474 | 1.2  | -1.5 | -2.5 | -14.3 | PRRT1  | Homo sapiens proline-rich transmembrane protein 1 (PRRT1), mRNA [NM_030651] | 80863 |
| A_23_P380754 | -8.6 | -1.5 | -1.3 | -2.2  | PRSS1  | Homo sapiens protease, serine, 1 (trypsin 1) (PRSS1), mRNA [NM_002769]      | 5644  |
| A_32_P94444  | 1.3  | 2.4  | 1.4  | 2.4   | PRSS2  | Homo sapiens protease, serine, 2 (trypsin 2) (PRSS2), mRNA [NM_002770]      | 5645  |
| A_23_P310274 | 1.1  | 1.6  | 2.3  | 1.0   | PRSS2  | Homo sapiens protease, serine, 2 (trypsin 2) (PRSS2), mRNA [NM_002770]      | 5645  |
| A_23_P87421  | 1.1  | 1.0  | 1.0  | 3.7   | PRSS23 | protease, serine, 23 [Source:HGNC Symbol;Acc:14370] [ENST00000532234]       | 11098 |

|              |      |      |      |      |         |                                                                                                     |        |
|--------------|------|------|------|------|---------|-----------------------------------------------------------------------------------------------------|--------|
| A_23_P106806 | -1.0 | 2.0  | 1.2  | -1.0 | PRSS27  | Homo sapiens protease, serine 27 (PRSS27), mRNA [NM_031948]                                         | 83886  |
| A_23_P135257 | 2.5  | 1.8  | 1.5  | -7.4 | PRSS3   | Homo sapiens protease, serine, 3 (PRSS3), transcript variant 2, mRNA [NM_002771]                    | 5646   |
| A_23_P350719 | 1.2  | -8.3 | -2.0 | -1.1 | PRSS30P | Homo sapiens protease, serine, 30 homolog (mouse), pseudogene (PRSS30P), non-coding RNA [NR_026864] | 124221 |
| A_23_P42397  | 1.1  | -9.1 | -1.1 | -1.0 | PRSS35  | Homo sapiens protease, serine, 35 (PRSS35), transcript variant 2, mRNA [NM_153362]                  | 167681 |

|              |      |      |      |      |        |                                                                                       |        |
|--------------|------|------|------|------|--------|---------------------------------------------------------------------------------------|--------|
| A_24_P412734 | 2.1  | 2.1  | 1.1  | -1.0 | PRSS36 | Homo sapiens protease, serine, 36 (PRSS36), mRNA [NM_173502]                          | 146547 |
| A_23_P93960  | -2.1 | 1.2  | -1.6 | -2.9 | PRSS37 | Homo sapiens protease, serine, 37 (PRSS37), transcript variant 1, mRNA [NM_001008270] | 136242 |
| A_24_P408767 | -1.0 | 10.7 | 10.2 | 12.8 | PRSS42 | Homo sapiens protease, serine, 42 (PRSS42), mRNA [NM_182702]                          | 339906 |
| A_23_P10172  | -1.5 | -1.5 | -4.7 | -1.6 | PRSS50 | Homo sapiens protease, serine, 50 (PRSS50), mRNA [NM_013270]                          | 29122  |
| A_24_P73817  | 1.1  | -2.1 | -1.9 | -3.2 | PRSS53 | Homo sapiens protease, serine, 53 (PRSS53), mRNA [NM_001039503]                       | 339105 |



|              |     |      |      |      |        |                                                                       |        |
|--------------|-----|------|------|------|--------|-----------------------------------------------------------------------|--------|
| A_23_P77697  | 1.0 | 1.0  | 1.1  | -2.1 | PRSS53 | protease, serine, 53 [Source:HGNC Symbol;Acc:34407] [ENST00000486499] | 339105 |
| A_24_P150803 | 2.7 | 1.8  | 1.8  | 2.3  | PRSS8  | Homo sapiens protease, serine, 8 (PRSS8), mRNA [NM_002773]            | 5652   |
| A_23_P142345 | 2.1 | -2.5 | 1.7  | -1.1 | PRTN3  | Homo sapiens proteinase 3 (PRTN3), mRNA [NM_002777]                   | 5657   |
| A_24_P217001 | 1.8 | 2.3  | -1.8 | -1.0 | PRUNE  | Homo sapiens prune homolog (Drosophila) (PRUNE), mRNA [NM_021222]     | 58497  |
| A_23_P429959 | 2.0 | 1.1  | 1.6  | 1.1  | PRX    | Homo sapiens periaxin (PRX), transcript variant 1, mRNA [NM_020956]   | 57716  |

|              |       |       |      |      |        |                                                                                               |        |
|--------------|-------|-------|------|------|--------|-----------------------------------------------------------------------------------------------|--------|
| A_24_P390909 | -1.4  | -1.8  | -2.1 | 2.6  | PRX    | Homo sapiens periaxin (PRX), transcript variant 2, mRNA [NM_181882]                           | 57716  |
| A_23_P12680  | -17.3 | -12.8 | -1.8 | -1.3 | PSAP   | Homo sapiens prosaposin (PSAP), transcript variant 2, mRNA [NM_001042465]                     | 5660   |
| A_23_P213020 | 1.1   | 1.1   | 2.2  | 1.1  | PSAPL1 | Homo sapiens prosaposin-like 1 (gene/pseudogene) (PSAPL1), mRNA [NM_001085382]                | 768239 |
| A_23_P259692 | -7.8  | -1.0  | -1.1 | -1.0 | PSAT1  | Homo sapiens phosphoserine aminotransferase 1 (PSAT1), transcript variant 1, mRNA [NM_058179] | 29968  |

|              |      |      |      |      |       |                                                                                                        |       |
|--------------|------|------|------|------|-------|--------------------------------------------------------------------------------------------------------|-------|
| A_24_P201021 | -1.6 | -2.9 | -1.1 | -1.0 | PSCA  | Homo sapiens prostate stem cell antigen (PSCA), transcript variant 1, mRNA [NM_005672]                 | 8000  |
| A_23_P115699 | 38.4 | 9.7  | 35.0 | 20.0 | PSD   | Homo sapiens pleckstrin and Sec7 domain containing (PSD), mRNA [NM_002779]                             | 5662  |
| A_24_P18146  | -1.0 | -1.0 | -2.9 | -1.0 | PSD3  | Homo sapiens pleckstrin and Sec7 domain containing 3 (PSD3), transcript variant 1, mRNA [NM_015310]    | 23362 |
| A_23_P130948 | 3.2  | 2.3  | 2.9  | 3.1  | PSG11 | Homo sapiens pregnancy specific beta-1-glycoprotein 11 (PSG11), transcript variant 1, mRNA [NM_002785] | 5680  |

|              |       |      |      |      |      |                                                                                                      |      |
|--------------|-------|------|------|------|------|------------------------------------------------------------------------------------------------------|------|
| A_23_P142335 | -6.2  | -1.1 | 1.1  | -1.2 | PSG2 | Homo sapiens pregnancy specific beta-1-glycoprotein 2 (PSG2), mRNA [NM_031246]                       | 5670 |
| A_23_P5103   | -1.0  | 2.3  | -1.9 | 3.1  | PSG4 | Homo sapiens pregnancy specific beta-1-glycoprotein 4 (PSG4), transcript variant 2, mRNA [NM_213633] | 5672 |
| A_32_P219970 | -14.6 | -1.8 | -4.7 | -2.5 | PSG5 | pregnancy specific beta-1-glycoprotein 5 [Source:HGNC Symbol;Acc:9522] [ENST00000366175]             | 5673 |

|              |      |      |      |      |      |                                                                                                                        |      |
|--------------|------|------|------|------|------|------------------------------------------------------------------------------------------------------------------------|------|
| A_23_P108170 | 1.1  | -5.6 | 1.1  | 1.3  | PSG6 | Homo sapiens pregnancy specific beta-1-glycoprotein 6 (PSG6), transcript variant 1, mRNA [NM_002782]                   | 5675 |
| A_24_P331761 | -1.4 | -1.2 | -1.0 | -3.4 | PSG7 | Homo sapiens pregnancy specific beta-1-glycoprotein 7 (gene/pseudogene) (PSG7), transcript variant 1, mRNA [NM_002783] | 5676 |
| A_23_P39309  | -2.0 | -1.1 | 1.0  | -3.5 | PSG9 | Homo sapiens pregnancy specific beta-1-glycoprotein 9 (PSG9), mRNA [NM_002784]                                         | 5678 |

|              |      |      |      |      |       |                                                                                                                    |      |
|--------------|------|------|------|------|-------|--------------------------------------------------------------------------------------------------------------------|------|
| A_23_P39304  | -1.2 | -1.0 | -6.3 | -1.1 | PSG9  | Homo sapiens pregnancy specific beta-1-glycoprotein 9 (PSG9), mRNA [NM_002784]                                     | 5678 |
| A_23_P91468  | 2.0  | -1.1 | 1.5  | -1.1 | PSMA7 | Homo sapiens proteasome (prosome, macropain) subunit, alpha type, 7 (PSMA7), mRNA [NM_002792]                      | 5688 |
| A_24_P284893 | -2.8 | -3.0 | -5.6 | -4.7 | PSMB2 | Homo sapiens proteasome (prosome, macropain) subunit, beta type, 2 (PSMB2), transcript variant 1, mRNA [NM_002794] | 5690 |

|              |      |      |      |      |       |                                                                                                                    |      |
|--------------|------|------|------|------|-------|--------------------------------------------------------------------------------------------------------------------|------|
| A_23_P170058 | -4.6 | -1.7 | -3.2 | -1.8 | PSMB2 | Homo sapiens proteasome (prosome, macropain) subunit, beta type, 2 (PSMB2), transcript variant 1, mRNA [NM_002794] | 5690 |
| A_23_P761    | -1.3 | -5.4 | 1.0  | 1.0  | PSMB4 | Homo sapiens proteasome (prosome, macropain) subunit, beta type, 4 (PSMB4), mRNA [NM_002796]                       | 5692 |
| A_24_P347488 | 1.1  | -4.6 | -1.1 | -1.0 | PSMC1 | Homo sapiens proteasome (prosome, macropain) 26S subunit, ATPase, 1 (PSMC1), mRNA [NM_002802]                      | 5700 |

|              |     |      |      |      |       |                                                                                               |      |
|--------------|-----|------|------|------|-------|-----------------------------------------------------------------------------------------------|------|
| A_32_P9700   | 1.3 | 1.7  | -2.3 | -1.8 | PSMC1 | Homo sapiens proteasome (prosome, macropain) 26S subunit, ATPase, 1 (PSMC1), mRNA [NM_002802] | 5700 |
| A_23_P104607 | 1.9 | 1.8  | 2.3  | 1.3  | PSMC3 | Homo sapiens proteasome (prosome, macropain) 26S subunit, ATPase, 3 (PSMC3), mRNA [NM_002804] | 5702 |
| A_23_P128930 | 1.1 | -1.1 | -2.0 | -1.1 | PSMC6 | Homo sapiens proteasome (prosome, macropain) 26S subunit, ATPase, 6 (PSMC6), mRNA [NM_002806] | 5706 |



|              |      |      |      |      |        |                                                                                                             |      |
|--------------|------|------|------|------|--------|-------------------------------------------------------------------------------------------------------------|------|
| A_23_P112613 | 1.1  | -2.2 | -1.0 | 2.1  | PSMD12 | proteasome (prosome, macropain) 26S subunit, non-ATPase, 12 [Source:HGNC Symbol;Acc:9557] [ENST00000356126] | 5718 |
| A_24_P42681  | -2.7 | 1.1  | -5.6 | -1.2 | PSMD2  | Homo sapiens proteasome (prosome, macropain) 26S subunit, non-ATPase, 2 (PSMD2), mRNA [NM_002808]           | 5708 |
| A_24_P289726 | 2.3  | -1.0 | -1.3 | 1.3  | PSMD3  | Homo sapiens proteasome (prosome, macropain) 26S subunit, non-ATPase, 3 (PSMD3), mRNA [NM_002809]           | 5709 |

|              |     |      |      |       |       |                                                                                                   |      |
|--------------|-----|------|------|-------|-------|---------------------------------------------------------------------------------------------------|------|
| A_23_P12168  | 4.1 | 1.4  | -1.3 | 1.1   | PSMD4 | Homo sapiens proteasome (prosome, macropain) 26S subunit, non-ATPase, 4 (PSMD4), mRNA [NM_002810] | 5710 |
| A_32_P435367 | 1.0 | -1.0 | -1.1 | -14.4 | PSMD4 | Homo sapiens proteasome (prosome, macropain) 26S subunit, non-ATPase, 4 (PSMD4), mRNA [NM_002810] | 5710 |
| A_23_P43434  | 1.0 | -1.0 | -2.0 | -2.0  | PSMD5 | Homo sapiens proteasome (prosome, macropain) 26S subunit, non-ATPase, 5 (PSMD5), mRNA [NM_005047] | 5711 |

|              |      |     |      |     |       |                                                                                                   |      |
|--------------|------|-----|------|-----|-------|---------------------------------------------------------------------------------------------------|------|
| A_24_P363802 | 1.5  | 1.9 | -1.1 | 2.4 | PSMD5 | Homo sapiens proteasome (prosome, macropain) 26S subunit, non-ATPase, 5 (PSMD5), mRNA [NM_005047] | 5711 |
| A_23_P106741 | -2.1 | 1.0 | -1.0 | 1.0 | PSMD7 | Homo sapiens proteasome (prosome, macropain) 26S subunit, non-ATPase, 7 (PSMD7), mRNA [NM_002811] | 5713 |
| A_32_P45875  | 4.3  | 4.9 | -1.3 | 2.3 | PSMD8 | Homo sapiens cDNA clone IMAGE:5441984, ****<br>WARNING: chimeric clone ****.<br>[BC071826]        | 5714 |

|              |      |      |      |      |       |                                                                                                                                   |       |
|--------------|------|------|------|------|-------|-----------------------------------------------------------------------------------------------------------------------------------|-------|
| A_23_P151614 | -6.3 | 1.0  | 1.0  | 1.0  | PSME1 | Homo sapiens proteasome (prosome, macropain) activator subunit 1 (PA28 alpha) (PSME1), transcript variant 1, mRNA [NM_006263]     | 5720  |
| A_24_P352864 | 2.0  | -2.4 | -5.7 | -1.5 | PSME3 | Homo sapiens proteasome (prosome, macropain) activator subunit 3 (PA28 gamma; Ki) (PSME3), transcript variant 1, mRNA [NM_005789] | 10197 |

|              |     |     |      |      |          |                                                                                                                         |        |
|--------------|-----|-----|------|------|----------|-------------------------------------------------------------------------------------------------------------------------|--------|
| A_24_P122050 | 2.0 | 2.5 | -1.1 | 1.4  | PSMF1    | Homo sapiens proteasome (prosome, macropain) inhibitor subunit 1 (PI31) (PSMF1), transcript variant 1, mRNA [NM_006814] | 9491   |
| A_24_P399362 | 2.1 | 2.0 | 2.0  | -1.1 | PSMG2    | Homo sapiens proteasome (prosome, macropain) assembly chaperone 2 (PSMG2), transcript variant 1, mRNA [NM_020232]       | 56984  |
| A_24_P166434 | 2.2 | 1.7 | 1.9  | 1.1  | PSORS1C2 | Homo sapiens psoriasis susceptibility 1 candidate 2 (PSORS1C2), mRNA [NM_014069]                                        | 170680 |

|             |      |      |      |      |          |                                                                                                     |        |
|-------------|------|------|------|------|----------|-----------------------------------------------------------------------------------------------------|--------|
| A_23_P81926 | 1.4  | 2.2  | 1.3  | 1.3  | PSORS1C2 | Homo sapiens psoriasis susceptibility 1 candidate 2 (PSORS1C2), mRNA [NM_014069]                    | 170680 |
| A_23_P76610 | -1.2 | -1.2 | -1.2 | -4.5 | PSPC1    | Homo sapiens paraspeckle component 1 (PSPC1), transcript variant 3, non-coding RNA [NR_044998]      | 55269  |
| A_23_P48997 | -1.3 | -1.4 | -2.3 | -1.1 | PSTPIP1  | Homo sapiens proline-serine-threonine phosphatase interacting protein 1 (PSTPIP1), mRNA [NM_003978] | 9051   |

|              |      |      |      |      |       |                                                                                                                       |       |
|--------------|------|------|------|------|-------|-----------------------------------------------------------------------------------------------------------------------|-------|
| A_24_P102821 | 1.7  | 1.8  | 2.8  | -1.0 | PTAFR | Homo sapiens platelet-activating factor receptor (PTAFR), transcript variant 3, mRNA [NM_000952]                      | 5724  |
| A_23_P51926  | -1.0 | -1.0 | -3.2 | -1.1 | PTAFR | Homo sapiens platelet-activating factor receptor (PTAFR), transcript variant 3, mRNA [NM_000952]                      | 5724  |
| A_23_P134650 | 3.9  | 4.0  | 3.8  | 2.2  | PTCD1 | Homo sapiens pentatricopeptide repeat domain 1 (PTCD1), nuclear gene encoding mitochondrial protein, mRNA [NM_015545] | 26024 |

|              |      |      |      |      |        |                                                                            |       |
|--------------|------|------|------|------|--------|----------------------------------------------------------------------------|-------|
| A_24_P191847 | -3.4 | -4.8 | -1.0 | -1.0 | PTCD2  | Homo sapiens pentatricopeptide repeat domain 2 (PTCD2), mRNA [NM_024754]   | 79810 |
| A_24_P115490 | -1.5 | -1.6 | -4.1 | -1.9 | PTCH1  | Homo sapiens patched 1 (PTCH1), transcript variant 1b, mRNA [NM_000264]    | 5727  |
| A_24_P106910 | 2.1  | 1.7  | 1.2  | -2.5 | PTCH1  | Homo sapiens patched 1 (PTCH1), transcript variant 1a, mRNA [NM_001083602] | 5727  |
| A_23_P355311 | 1.1  | -1.1 | 2.6  | 1.7  | PTCH2  | Homo sapiens patched 2 (PTCH2), transcript variant 1, mRNA [NM_003738]     | 8643  |
| A_32_P232411 | 1.7  | 3.9  | -2.3 | -1.2 | PTCHD2 | Homo sapiens patched domain containing 2 (PTCHD2), mRNA [NM_020780]        | 57540 |



|              |      |      |      |      |        |                                                                                                |        |
|--------------|------|------|------|------|--------|------------------------------------------------------------------------------------------------|--------|
| A_23_P30755  | 3.2  | 3.4  | -1.5 | -2.1 | PTCRA  | Homo sapiens pre T-cell antigen receptor alpha (PTCRA), transcript variant 2, mRNA [NM_138296] | 171558 |
| A_32_P353798 | 2.2  | 1.0  | -1.0 | 1.1  | PTDSS2 | Homo sapiens phosphatidyserine synthase 2 (PTDSS2), mRNA [NM_030783]                           | 81490  |
| A_24_P913115 | -1.0 | -4.0 | 1.0  | -1.4 | PTEN   | Homo sapiens phosphatase and tensin homolog (PTEN), mRNA [NM_000314]                           | 5728   |
| A_23_P323774 | 1.0  | -1.8 | -3.4 | -3.1 | PTER   | Homo sapiens phosphotriesterase related (PTER), transcript variant 1, mRNA [NM_001001484]      | 9317   |

|              |      |      |      |      |       |                                                                                   |        |
|--------------|------|------|------|------|-------|-----------------------------------------------------------------------------------|--------|
| A_23_P428329 | -1.9 | -6.2 | -3.1 | -2.7 | PTF1A | Homo sapiens pancreas specific transcription factor, 1a (PTF1A), mRNA [NM_178161] | 256297 |
| A_24_P919916 | -1.7 | 1.1  | -3.7 | -2.8 | PTF1A | Homo sapiens bHLH transcription factor p48 mRNA, partial cds. [AF181999]          | 256297 |
| A_23_P393777 | 1.8  | -1.0 | -2.3 | -1.4 | PTGDR | Homo sapiens prostaglandin D2 receptor (DP) (PTGDR), mRNA [NM_000953]             | 5729   |
| A_23_P146554 | 2.6  | -1.7 | 1.2  | 1.8  | PTGDS | Homo sapiens prostaglandin D2 synthase 21kDa (brain) (PTGDS), mRNA [NM_000954]    | 5730   |

|              |      |      |      |      |        |                                                                                                        |       |
|--------------|------|------|------|------|--------|--------------------------------------------------------------------------------------------------------|-------|
| A_24_P945365 | 1.6  | -1.3 | -1.5 | -2.1 | PTGER3 | Homo sapiens prostaglandin E receptor 3 (subtype EP3) (PTGER3), transcript variant 5, mRNA [NM_198715] | 5733  |
| A_23_P435394 | -2.8 | 1.6  | 1.6  | 1.0  | PTGER4 | Homo sapiens prostaglandin E receptor 4 (subtype EP4) (PTGER4), mRNA [NM_000958]                       | 5734  |
| A_24_P403417 | 1.4  | -1.5 | -1.2 | -2.0 | PTGES  | Homo sapiens prostaglandin E synthase (PTGES), mRNA [NM_004878]                                        | 9536  |
| A_24_P106953 | 1.1  | 2.6  | 2.1  | 1.3  | PTGES2 | Homo sapiens prostaglandin E synthase 2 (PTGES2), transcript variant 1, mRNA [NM_025072]               | 80142 |

|              |      |      |      |      |        |                                                                                               |       |
|--------------|------|------|------|------|--------|-----------------------------------------------------------------------------------------------|-------|
| A_24_P343869 | -1.7 | -1.6 | -2.0 | -1.2 | PTGES3 | Homo sapiens prostaglandin E synthase 3 (cytosolic) (PTGES3), mRNA [NM_006601]                | 10728 |
| A_24_P302172 | 1.2  | 1.2  | 1.1  | -4.9 | PTGFR  | Homo sapiens prostaglandin F receptor (FP) (PTGFR), transcript variant 2, mRNA [NM_001039585] | 5737  |
| A_24_P322426 | 3.1  | 3.8  | 1.1  | 4.5  | PTGIR  | Homo sapiens prostaglandin I2 (prostacyclin) receptor (IP) (PTGIR), mRNA [NM_000960]          | 5739  |
| A_23_P91262  | -1.1 | -2.4 | -1.3 | -3.0 | PTGIS  | Homo sapiens prostaglandin I2 (prostacyclin) synthase (PTGIS), mRNA [NM_000961]               | 5740  |

|              |      |      |      |      |       |                                                                                                                                                    |        |
|--------------|------|------|------|------|-------|----------------------------------------------------------------------------------------------------------------------------------------------------|--------|
| A_23_P157809 | 1.0  | 2.4  | -1.2 | 2.5  | PTGR1 | Homo sapiens prostaglandin reductase 1 (PTGR1), transcript variant 2, mRNA [NM_012212]                                                             | 22949  |
| A_23_P48705  | -1.4 | -3.9 | 2.1  | 2.2  | PTGR2 | Homo sapiens prostaglandin reductase 2 (PTGR2), transcript variant 1, mRNA [NM_152444]                                                             | 145482 |
| A_24_P64167  | 1.0  | -3.3 | -1.7 | -3.9 | PTGS1 | Homo sapiens prostaglandin-endoperoxide synthase 1 (prostaglandin G/H synthase and cyclooxygenase) (PTGS1), transcript variant 1, mRNA [NM_000962] | 5742   |

|              |      |      |      |      |       |                                                                                             |        |
|--------------|------|------|------|------|-------|---------------------------------------------------------------------------------------------|--------|
| A_23_P167030 | 1.8  | 2.8  | 2.3  | 2.2  | PTH1R | Homo sapiens parathyroid hormone 1 receptor (PTH1R), transcript variant 1, mRNA [NM_000316] | 5745   |
| A_23_P357374 | 2.2  | 1.8  | 1.6  | 1.7  | PTH2  | Homo sapiens parathyroid hormone 2 (PTH2), mRNA [NM_178449]                                 | 113091 |
| A_24_P923612 | -1.3 | -1.3 | -2.2 | -2.8 | PTHLH | parathyroid hormone-like hormone [Source:HGNC Symbol;Acc:9607] [ENST00000354417]            | 5744   |
| A_23_P22096  | -2.0 | -2.5 | -1.2 | -1.2 | PTK2  | Homo sapiens PTK2 protein tyrosine kinase 2 (PTK2), transcript variant 1, mRNA [NM_153831]  | 5747   |

|              |      |       |      |      |        |                                                                                         |      |
|--------------|------|-------|------|------|--------|-----------------------------------------------------------------------------------------|------|
| A_23_P56978  | -3.0 | -21.5 | -1.0 | -1.0 | PTK6   | Homo sapiens PTK6 protein tyrosine kinase 6 (PTK6), mRNA [NM_005975]                    | 5753 |
| A_23_P434301 | 1.8  | 1.2   | 2.8  | -1.0 | PTMA   | Homo sapiens prothymosin, alpha (PTMA), transcript variant 2, mRNA [NM_002823]          | 5757 |
| A_24_P870620 | 1.8  | -1.8  | -1.2 | -3.2 | PTN    | Homo sapiens pleiotrophin (PTN), mRNA [NM_002825]                                       | 5764 |
| A_24_P252043 | -1.7 | 1.5   | -2.4 | 1.9  | PTP4A1 | Homo sapiens protein tyrosine phosphatase type IVA, member 1 (PTP4A1), mRNA [NM_003463] | 7803 |

|              |      |      |     |      |        |                                                                                                                                                          |        |
|--------------|------|------|-----|------|--------|----------------------------------------------------------------------------------------------------------------------------------------------------------|--------|
| A_23_P378968 | 2.6  | 4.9  | 2.5 | 2.8  | PTP4A2 | Homo sapiens protein tyrosine phosphatase type IVA, member 2 (PTP4A2), transcript variant 1, mRNA [NM_080391]                                            | 8073   |
| A_24_P764598 | 3.1  | 1.8  | 1.8 | 1.9  | PTP4A2 | Homo sapiens protein tyrosine phosphatase type IVA, member 2 (PTP4A2), transcript variant 4, mRNA [NM_001195101]                                         | 8073   |
| A_24_P110062 | -1.6 | -1.5 | 3.2 | -2.1 | PTPMT1 | Homo sapiens protein tyrosine phosphatase, mitochondrial 1 (PTPMT1), nuclear gene encoding mitochondrial protein, transcript variant 1, mRNA [NM_175732] | 114971 |



|              |      |      |      |      |        |                                                                                            |      |
|--------------|------|------|------|------|--------|--------------------------------------------------------------------------------------------|------|
| A_23_P338890 | -2.8 | -1.8 | -1.1 | -1.0 | PTPN1  | Homo sapiens protein tyrosine phosphatase, non-receptor type 1 (PTPN1), mRNA [NM_002827]   | 5770 |
| A_32_P61757  | 1.8  | 1.8  | 2.1  | 1.0  | PTPN11 | Homo sapiens protein tyrosine phosphatase, non-receptor type 11 (PTPN11), mRNA [NM_002834] | 5781 |
| A_23_P105436 | 1.0  | 1.3  | -2.3 | -1.6 | PTPN11 | Homo sapiens protein tyrosine phosphatase, non-receptor type 11 (PTPN11), mRNA [NM_002834] | 5781 |

|              |     |      |      |      |        |                                                                                                                                                            |      |
|--------------|-----|------|------|------|--------|------------------------------------------------------------------------------------------------------------------------------------------------------------|------|
| A_23_P8763   | 1.1 | -1.6 | -1.3 | -3.9 | PTPN12 | Homo sapiens protein tyrosine phosphatase, non-receptor type 12 (PTPN12), transcript variant 1, mRNA [NM_002835]                                           | 5782 |
| A_23_P18493  | 1.1 | 1.1  | 1.0  | -4.9 | PTPN13 | Homo sapiens protein tyrosine phosphatase, non-receptor type 13 (APO-1/CD95 (Fas)-associated phosphatase) (PTPN13), transcript variant 4, mRNA [NM_080685] | 5783 |
| A_23_P149111 | 1.5 | 12.0 | 4.3  | 3.3  | PTPN14 | Homo sapiens protein tyrosine phosphatase, non-receptor type 14 (PTPN14), mRNA [NM_005401]                                                                 | 5784 |

|              |     |     |      |     |        |                                                                                                                |       |
|--------------|-----|-----|------|-----|--------|----------------------------------------------------------------------------------------------------------------|-------|
| A_23_P309701 | 1.0 | 1.7 | 1.0  | 2.4 | PTPN2  | Homo sapiens protein tyrosine phosphatase, non-receptor type 2 (PTPN2), transcript variant 1, mRNA [NM_002828] | 5771  |
| A_24_P328675 | 3.1 | 5.4 | -1.5 | 1.3 | PTPN23 | Homo sapiens protein tyrosine phosphatase, non-receptor type 23 (PTPN23), mRNA [NM_015466]                     | 25930 |
| A_23_P69306  | 3.6 | 3.6 | -1.3 | 1.3 | PTPN23 | Homo sapiens protein tyrosine phosphatase, non-receptor type 23 (PTPN23), mRNA [NM_015466]                     | 25930 |

|              |      |      |      |       |       |                                                                                                                   |      |
|--------------|------|------|------|-------|-------|-------------------------------------------------------------------------------------------------------------------|------|
| A_24_P928969 | -1.1 | -3.7 | -1.0 | -21.6 | PTPN3 | Homo sapiens protein tyrosine phosphatase, non-receptor type 3 (PTPN3), transcript variant 3, mRNA [NM_001145369] | 5774 |
| A_23_P403898 | -2.3 | -1.0 | -1.1 | 1.0   | PTPN3 | Homo sapiens protein tyrosine phosphatase, non-receptor type 3 (PTPN3), transcript variant 1, mRNA [NM_002829]    | 5774 |
| A_23_P165343 | -2.0 | -1.4 | -2.2 | -3.1  | PTPN4 | Homo sapiens protein tyrosine phosphatase, non-receptor type 4 (megakaryocyte) (PTPN4), mRNA [NM_002830]          | 5775 |

|              |      |      |      |      |       |                                                                                                                                    |       |
|--------------|------|------|------|------|-------|------------------------------------------------------------------------------------------------------------------------------------|-------|
| A_24_P409519 | -3.0 | 1.2  | -2.6 | 1.9  | PTPN5 | Homo sapiens protein tyrosine phosphatase, non-receptor type 5 (striatum-enriched) (PTPN5), transcript variant 1, mRNA [NM_006906] | 84867 |
| A_23_P201778 | -1.0 | -1.0 | -6.1 | 1.0  | PTPN7 | Homo sapiens protein tyrosine phosphatase, non-receptor type 7 (PTPN7), transcript variant 2, mRNA [NM_080588]                     | 5778  |
| A_23_P53390  | -2.5 | 1.1  | 1.0  | -1.0 | PTPRB | Homo sapiens protein tyrosine phosphatase, receptor type, B (PTPRB), transcript variant 2, mRNA [NM_002837]                        | 5787  |

|              |     |      |      |     |         |                                                                                                             |      |
|--------------|-----|------|------|-----|---------|-------------------------------------------------------------------------------------------------------------|------|
| A_23_P98173  | 1.5 | -2.2 | -2.7 | 1.8 | PTPRCAP | Homo sapiens protein tyrosine phosphatase, receptor type, C-associated protein (PTPRCAP), mRNA [NM_005608]  | 5790 |
| A_24_P927863 | 8.8 | 8.5  | 7.9  | 6.9 | PTPRE   | protein tyrosine phosphatase, receptor type, E [Source:HGNC Symbol;Acc:9669] [ENST00000455661]              | 5791 |
| A_24_P213494 | 1.3 | 2.1  | -1.8 | 1.2 | PTPRE   | Homo sapiens protein tyrosine phosphatase, receptor type, E (PTPRE), transcript variant 1, mRNA [NM_006504] | 5791 |

|              |      |      |      |      |       |                                                                                                             |      |
|--------------|------|------|------|------|-------|-------------------------------------------------------------------------------------------------------------|------|
| A_23_P138495 | -1.3 | 2.1  | 1.8  | 1.0  | PTPRE | Homo sapiens protein tyrosine phosphatase, receptor type, E (PTPRE), transcript variant 1, mRNA [NM_006504] | 5791 |
| A_24_P385313 | 1.3  | 2.6  | 2.4  | -1.2 | PTPRF | Homo sapiens protein tyrosine phosphatase, receptor type, F (PTPRF), transcript variant 1, mRNA [NM_002840] | 5792 |
| A_23_P405049 | -3.8 | -1.0 | -1.1 | -1.0 | PTPRJ | Homo sapiens protein tyrosine phosphatase, receptor type, J (PTPRJ), transcript variant 1, mRNA [NM_002843] | 5795 |

|              |      |      |      |      |       |                                                                                                                        |      |
|--------------|------|------|------|------|-------|------------------------------------------------------------------------------------------------------------------------|------|
| A_23_P90722  | 44.4 | 30.0 | 26.9 | 27.4 | PTPRN | Homo sapiens protein tyrosine phosphatase, receptor type, N (PTPRN), transcript variant 1, mRNA [NM_002846]            | 5798 |
| A_24_P76809  | 2.2  | 3.3  | 2.1  | -1.2 | PTPRO | Homo sapiens protein tyrosine phosphatase, receptor type, O, mRNA (cDNA clone IMAGE:4610767), complete cds. [BC035960] | 5800 |
| A_24_P290856 | -3.3 | -1.4 | -1.5 | -1.4 | PTPRS | Homo sapiens protein tyrosine phosphatase, receptor type, S (PTPRS), transcript variant 3, mRNA [NM_130853]            | 5802 |



|              |       |      |      |      |        |                                                                                                                            |       |
|--------------|-------|------|------|------|--------|----------------------------------------------------------------------------------------------------------------------------|-------|
| A_23_P56163  | -1.4  | -1.6 | -4.9 | -1.3 | PTPRS  | Homo sapiens protein tyrosine phosphatase, receptor type, S (PTPRS), transcript variant 1, mRNA [NM_002850]                | 5802  |
| A_23_P149064 | -18.8 | -1.3 | 1.1  | 1.8  | PTPRU  | Homo sapiens protein tyrosine phosphatase, receptor type, U (PTPRU), transcript variant 3, mRNA [NM_005704]                | 10076 |
| A_24_P8474   | -1.0  | -1.1 | -3.4 | -1.1 | PTPRZ1 | Homo sapiens protein tyrosine phosphatase, receptor-type, Z polypeptide 1 (PTPRZ1), transcript variant 1, mRNA [NM_002851] | 5803  |

|              |       |      |      |      |        |                                                                                                                            |        |
|--------------|-------|------|------|------|--------|----------------------------------------------------------------------------------------------------------------------------|--------|
| A_24_P235248 | 1.0   | -2.9 | 1.0  | -1.0 | PTPRZ1 | Homo sapiens protein tyrosine phosphatase, receptor-type, Z polypeptide 1 (PTPRZ1), transcript variant 1, mRNA [NM_002851] | 5803   |
| A_23_P141376 | -1.5  | -5.8 | -1.0 | -1.4 | PTRF   | Homo sapiens polymerase I and transcript release factor (PTRF), mRNA [NM_012232]                                           | 284119 |
| A_24_P16036  | -26.3 | -2.4 | -1.1 | 1.6  | PTRHD1 | Homo sapiens peptidyl-tRNA hydrolase domain containing 1 (PTRHD1), mRNA [NM_001013663]                                     | 391356 |

|              |      |      |      |      |         |                                                                                              |       |
|--------------|------|------|------|------|---------|----------------------------------------------------------------------------------------------|-------|
| A_23_P109345 | -1.6 | -2.2 | -1.4 | -3.1 | PTTG1IP | Homo sapiens pituitary tumor-transforming 1 interacting protein (PTTG1IP), mRNA [NM_004339]  | 754   |
| A_23_P18579  | 1.7  | 1.3  | -7.8 | 1.3  | PTTG2   | Homo sapiens pituitary tumor-transforming 2 (PTTG2), mRNA [NM_006607]                        | 10744 |
| A_23_P60016  | -1.1 | -2.0 | -2.6 | -2.4 | PTTG3P  | Homo sapiens pituitary tumor-transforming 3, pseudogene (PTTG3P), non-coding RNA [NR_002734] | 26255 |

|              |      |     |       |      |       |                                                                                                   |       |
|--------------|------|-----|-------|------|-------|---------------------------------------------------------------------------------------------------|-------|
| A_24_P149645 | 1.1  | 2.0 | 1.0   | -1.0 | PUF60 | Homo sapiens poly-U binding splicing factor 60KDa (PUF60), transcript variant 2, mRNA [NM_014281] | 22827 |
| A_24_P171345 | -1.2 | 2.1 | -28.3 | 1.2  | PUM1  | Homo sapiens pumilio homolog 1 (Drosophila) (PUM1), transcript variant 1, mRNA [NM_001020658]     | 9698  |
| A_23_P5550   | 4.1  | 5.5 | 5.4   | 5.0  | PUM2  | Homo sapiens pumilio homolog 2 (Drosophila) (PUM2), mRNA [NM_015317]                              | 23369 |
| A_24_P71439  | -2.3 | 2.2 | -1.2  | -1.8 | PUM2  | Homo sapiens pumilio homolog 2 (Drosophila) (PUM2), mRNA [NM_015317]                              | 23369 |

|              |      |     |      |      |       |                                                                                                   |        |
|--------------|------|-----|------|------|-------|---------------------------------------------------------------------------------------------------|--------|
| A_23_P134517 | 3.0  | 1.8 | 1.1  | -3.4 | PURB  | Homo sapiens purine-rich element binding protein B (PURB), mRNA [NM_033224]                       | 5814   |
| A_23_P111919 | 4.3  | 4.3 | 4.3  | 4.3  | PURG  | Homo sapiens purine-rich element binding protein G (PURG), transcript variant A, mRNA [NM_013357] | 29942  |
| A_23_P251771 | -2.1 | 1.1 | 1.1  | 1.1  | PUS1  | Homo sapiens pseudouridylate synthase 1 (PUS1), transcript variant 1, mRNA [NM_025215]            | 80324  |
| A_23_P412029 | -2.1 | 1.2 | -1.0 | -1.7 | PUS10 | Homo sapiens pseudouridylate synthase 10 (PUS10), mRNA [NM_144709]                                | 150962 |

|              |       |      |      |      |       |                                                                                                                      |        |
|--------------|-------|------|------|------|-------|----------------------------------------------------------------------------------------------------------------------|--------|
| A_23_P373687 | 1.1   | -5.2 | -1.9 | 1.7  | PUS10 | Homo sapiens pseudouridylate synthase 10 (PUS10), mRNA [NM_144709]                                                   | 150962 |
| A_24_P167496 | -17.7 | 1.0  | -1.0 | -1.0 | PUS7L | Homo sapiens pseudouridylate synthase 7 homolog (S. cerevisiae)-like (PUS7L), transcript variant 3, mRNA [NM_031292] | 83448  |
| A_23_P51884  | 1.0   | -2.4 | -1.0 | -1.3 | PUSL1 | Homo sapiens pseudouridylate synthase-like 1 (PUSL1), mRNA [NM_153339]                                               | 126789 |
| A_23_P17844  | -3.7  | -1.2 | -1.4 | -1.5 | PVALB | Homo sapiens parvalbumin (PVALB), mRNA [NM_002854]                                                                   | 5816   |

|             |     |      |      |       |       |                                                                                                                           |       |
|-------------|-----|------|------|-------|-------|---------------------------------------------------------------------------------------------------------------------------|-------|
| A_23_P8424  | 2.6 | 3.2  | 1.5  | 1.0   | PVRIG | Homo sapiens poliovirus receptor related immunoglobulin domain containing (PVRIG), mRNA [NM_024070]                       | 79037 |
| A_23_P76034 | 2.1 | 2.8  | 1.4  | 1.7   | PVRL1 | Homo sapiens poliovirus receptor-related 1 (herpesvirus entry mediator C) (PVRL1), transcript variant 3, mRNA [NM_203286] | 5818  |
| A_23_P80763 | 1.1 | -2.8 | -1.0 | -10.3 | PVRL3 | Homo sapiens poliovirus receptor-related 3 (PVRL3), transcript variant 1, mRNA [NM_015480]                                | 25945 |

|              |      |      |      |      |        |                                                                                            |        |
|--------------|------|------|------|------|--------|--------------------------------------------------------------------------------------------|--------|
| A_23_P401547 | -1.0 | -1.0 | -3.7 | -1.0 | PVRL3  | Homo sapiens poliovirus receptor-related 3 (PVRL3), transcript variant 1, mRNA [NM_015480] | 25945  |
| A_23_P105753 | 4.0  | 3.8  | 3.6  | 3.6  | PWP1   | PWP1 homolog (S. cerevisiae) [Source:HGNC Symbol;Acc:17015] [ENST00000412830]              | 11137  |
| A_23_P374389 | 1.5  | 1.0  | -3.5 | -1.3 | PWWP2B | Homo sapiens PWWP domain containing 2B (PWWP2B), transcript variant 1, mRNA [NM_138499]    | 170394 |
| A_24_P944570 | 12.5 | 12.3 | 11.8 | 12.8 | PXDN   | Homo sapiens melanoma-associated antigen MG50 mRNA, partial cds. [AF200348]                | 7837   |



|              |      |      |      |      |       |                                                                                                               |       |
|--------------|------|------|------|------|-------|---------------------------------------------------------------------------------------------------------------|-------|
| A_23_P257144 | 1.0  | 2.8  | -1.2 | 1.0  | PXDN  | Homo sapiens peroxidasi n homolog (Drosophila) (PXDN), mRNA [NM_012293]                                       | 7837  |
| A_32_P115606 | -2.0 | -1.0 | -2.8 | -1.1 | PXK   | PX domain containing serine/threonine kinase [Source:HGNC Symbol;Acc:23326] [ENST00000536750]                 | 54899 |
| A_24_P918065 | 1.1  | 1.1  | 1.0  | -3.2 | PXMP2 | Homo sapiens peroxisomal membrane protein 2, 22kDa, mRNA (cDNA clone IMAGE:4098463), complete cds. [BC009836] | 5827  |

|              |       |      |      |      |       |                                                                                                    |       |
|--------------|-------|------|------|------|-------|----------------------------------------------------------------------------------------------------|-------|
| A_23_P124122 | 2.9   | 4.9  | 4.3  | 3.4  | PXMP2 | Homo sapiens peroxisomal membrane protein 2, 22kDa (PXMP2), mRNA [NM_018663]                       | 5827  |
| A_23_P91430  | -1.5  | -2.0 | -2.1 | -1.6 | PXMP4 | Homo sapiens peroxisomal membrane protein 4, 24kDa (PXMP4), transcript variant 1, mRNA [NM_007238] | 11264 |
| A_24_P184555 | 2.1   | 2.0  | 2.4  | 1.4  | PXN   | Homo sapiens paxillin (PXN), transcript variant 1, mRNA [NM_002859]                                | 5829  |
| A_24_P204358 | -29.1 | 1.3  | 2.6  | 1.0  | PYCR1 | Homo sapiens pyrroline-5-carboxylate reductase 1 (PYCR1), transcript variant 2, mRNA [NM_153824]   | 5831  |

|              |       |      |      |      |       |                                                                                            |       |
|--------------|-------|------|------|------|-------|--------------------------------------------------------------------------------------------|-------|
| A_23_P149042 | -1.6  | 2.2  | -2.3 | -1.7 | PYCR2 | Homo sapiens pyrroline-5-carboxylate reductase family, member 2 (PYCR2), mRNA [NM_013328]  | 29920 |
| A_24_P4212   | -1.7  | -7.0 | -1.7 | -1.7 | PYCRL | Homo sapiens pyrroline-5-carboxylate reductase-like (PYCRL), mRNA [NM_023078]              | 65263 |
| A_23_P210849 | 1.0   | 2.0  | 1.1  | 4.4  | PYGB  | Homo sapiens phosphorylase, glycogen; brain (PYGB), mRNA [NM_002862]                       | 5834  |
| A_23_P48676  | -15.8 | 1.7  | 1.9  | -1.1 | PYGL  | Homo sapiens phosphorylase, glycogen, liver (PYGL), transcript variant 1, mRNA [NM_002863] | 5836  |

|              |     |      |     |     |         |                                                                                                 |       |
|--------------|-----|------|-----|-----|---------|-------------------------------------------------------------------------------------------------|-------|
| A_23_P52657  | 1.8 | 2.1  | 1.3 | 1.0 | PYGM    | Homo sapiens phosphorylase, glycogen, muscle (PYGM), transcript variant 1, mRNA [NM_005609]     | 5837  |
| A_23_P411953 | 1.3 | -1.0 | 2.1 | 1.8 | PYGO2   | Homo sapiens pygopus homolog 2 (Drosophila) (PYGO2), mRNA [NM_138300]                           | 90780 |
| A_24_P221407 | 2.0 | -2.2 | 1.8 | 1.9 | PYROXD1 | Homo sapiens pyridine nucleotide-disulphide oxidoreductase domain 1 (PYROXD1), mRNA [NM_024854] | 79912 |

|              |       |     |      |      |         |                                                                                                 |       |
|--------------|-------|-----|------|------|---------|-------------------------------------------------------------------------------------------------|-------|
| A_23_P24157  | 5.8   | 6.8 | 3.2  | 2.5  | PYROXD2 | Homo sapiens pyridine nucleotide-disulphide oxidoreductase domain 2 (PYROXD2), mRNA [NM_032709] | 84795 |
| A_23_P4112   | 1.2   | 1.2 | -2.5 | -1.5 | PYY     | Homo sapiens peptide YY (PYY), mRNA [NM_004160]                                                 | 5697  |
| A_24_P233078 | 2.1   | 4.3 | 1.0  | 2.2  | PYY2    | Homo sapiens peptide YY, 2 (seminalplasmin) (PYY2), non-coding RNA [NR_003064]                  | 23615 |
| A_23_P139682 | -10.0 | 1.0 | -2.3 | 1.1  | PZP     | Homo sapiens pregnancy-zone protein (PZP), mRNA [NM_002864]                                     | 5858  |

|              |      |      |      |      |      |                                                                                                    |      |
|--------------|------|------|------|------|------|----------------------------------------------------------------------------------------------------|------|
| A_32_P532216 | -1.1 | -1.1 | -1.1 | -6.1 | QARS | Homo sapiens glutaminyl-tRNA synthetase (QARS), mRNA [NM_005051]                                   | 5859 |
| A_23_P81760  | -2.0 | 1.1  | -1.1 | -1.0 | QKI  | Homo sapiens QKI, KH domain containing , RNA binding (QKI), transcript variant 1, mRNA [NM_006775] | 9444 |
| A_24_P940426 | -2.1 | 2.4  | -2.3 | 1.4  | QKI  | Homo sapiens QKI, KH domain containing , RNA binding (QKI), transcript variant 4, mRNA [NM_206855] | 9444 |
| A_24_P384954 | 3.7  | 3.6  | 3.4  | 3.0  | QKI  | Homo sapiens QKI, KH domain containing , RNA binding (QKI), transcript variant 1, mRNA [NM_006775] | 9444 |

|             |      |      |      |      |        |                                                                                  |       |
|-------------|------|------|------|------|--------|----------------------------------------------------------------------------------|-------|
| A_23_P16915 | -1.1 | -1.8 | -3.2 | -1.3 | QPCT   | Homo sapiens glutaminyl-peptide cyclotransferase (QPCT), mRNA [NM_012413]        | 25797 |
| A_23_P34233 | 1.1  | -1.5 | -2.5 | -1.6 | QPRT   | Homo sapiens quinolate phosphoribosyltransferase (QPRT), mRNA [NM_014298]        | 23475 |
| A_23_P92467 | -1.0 | -1.0 | -1.0 | -2.2 | QRFPR  | Homo sapiens pyroglutamylated RFamide peptide receptor (QRFPR), mRNA [NM_198179] | 84109 |
| A_23_P45108 | 3.7  | 3.3  | 3.2  | 1.1  | QRICH1 | Homo sapiens glutamine-rich 1 (QRICH1), transcript variant 1, mRNA [NM_017730]   | 54870 |

|              |      |      |      |      |       |                                                                                                |       |
|--------------|------|------|------|------|-------|------------------------------------------------------------------------------------------------|-------|
| A_24_P63799  | -2.7 | -1.8 | 1.7  | 2.1  | QRSL1 | Homo sapiens glutaminyl-tRNA synthase (glutamine-hydrolyzing)-like 1 (QRSL1), mRNA [NM_018292] | 55278 |
| A_24_P132276 | 1.1  | -2.5 | 1.8  | -1.0 | QRSL1 | Homo sapiens glutaminyl-tRNA synthase (glutamine-hydrolyzing)-like 1 (QRSL1), mRNA [NM_018292] | 55278 |
| A_24_P163477 | -1.0 | -1.0 | -7.5 | 1.1  | QRSL1 | Homo sapiens glutaminyl-tRNA synthase (glutamine-hydrolyzing)-like 1 (QRSL1), mRNA [NM_018292] | 55278 |



|              |      |      |      |      |        |                                                                                               |       |
|--------------|------|------|------|------|--------|-----------------------------------------------------------------------------------------------|-------|
| A_23_P12463  | -3.5 | 1.1  | -1.8 | -1.9 | QSOX1  | Homo sapiens quiescin Q6 sulfhydryl oxidase 1 (QSOX1), transcript variant 1, mRNA [NM_002826] | 5768  |
| A_24_P96234  | 2.4  | 2.2  | 1.8  | 2.4  | QTRT1  | Homo sapiens queuine tRNA-ribosyltransferase 1 (QTRT1), mRNA [NM_031209]                      | 81890 |
| A_23_P10374  | 2.6  | 3.1  | 2.6  | 1.6  | R3HDM2 | Homo sapiens R3H domain containing 2 (R3HDM2), mRNA [NM_014925]                               | 22864 |
| A_24_P207907 | -1.0 | -1.1 | -8.0 | -1.0 | R3HDM2 | Homo sapiens R3H domain containing 2 (R3HDM2), mRNA [NM_014925]                               | 22864 |

|              |      |     |     |      |           |                                                                                         |       |
|--------------|------|-----|-----|------|-----------|-----------------------------------------------------------------------------------------|-------|
| A_23_P165879 | 1.3  | 4.1 | 1.2 | -1.3 | RAB10     | Homo sapiens RAB10, member RAS oncogene family (RAB10), mRNA [NM_016131]                | 10890 |
| A_23_P67748  | -1.6 | 3.1 | 3.1 | 1.6  | RAB11B    | Homo sapiens RAB11B, member RAS oncogene family (RAB11B), mRNA [NM_004218]              | 9230  |
| A_24_P363953 | 2.2  | 2.8 | 1.3 | -1.1 | RAB11FIP2 | Homo sapiens RAB11 family interacting protein 2 (class I) (RAB11FIP2), mRNA [NM_014904] | 22841 |
| A_23_P415006 | -1.1 | 2.0 | 1.6 | 3.0  | RAB11FIP5 | Homo sapiens RAB11 family interacting protein 5 (class I) (RAB11FIP5), mRNA [NM_015470] | 26056 |

|              |      |      |      |      |       |                                                                             |        |
|--------------|------|------|------|------|-------|-----------------------------------------------------------------------------|--------|
| A_24_P53353  | 1.1  | -2.4 | -1.3 | -1.0 | RAB12 | Homo sapiens RAB12, member RAS oncogene family (RAB12), mRNA [NM_001025300] | 201475 |
| A_23_P46369  | 2.3  | 2.2  | 2.2  | 2.1  | RAB13 | Homo sapiens RAB13, member RAS oncogene family (RAB13), mRNA [NM_002870]    | 5872   |
| A_24_P193295 | -3.2 | -6.2 | -5.8 | -2.7 | RAB15 | Homo sapiens RAB15, member RAS oncogene family (RAB15), mRNA [NM_198686]    | 376267 |
| A_23_P138376 | 2.3  | 2.1  | 1.8  | 2.0  | RAB18 | Homo sapiens RAB18, member RAS oncogene family (RAB18), mRNA [NM_021252]    | 22931  |

|              |      |      |      |      |       |                                                                                                |       |
|--------------|------|------|------|------|-------|------------------------------------------------------------------------------------------------|-------|
| A_23_P382148 | -2.6 | -7.8 | -6.9 | -1.4 | RAB1A | Homo sapiens RAB1A, member RAS oncogene family (RAB1A), transcript variant 1, mRNA [NM_004161] | 5861  |
| A_23_P64090  | 2.1  | 2.6  | 2.2  | 1.9  | RAB1B | Homo sapiens RAB1B, member RAS oncogene family (RAB1B), mRNA [NM_030981]                       | 81876 |
| A_23_P70794  | -1.0 | -1.1 | -5.4 | -1.4 | RAB23 | Homo sapiens RAB23, member RAS oncogene family (RAB23), transcript variant 1, mRNA [NM_016277] | 51715 |

|              |     |      |      |      |        |                                                                                                                                       |       |
|--------------|-----|------|------|------|--------|---------------------------------------------------------------------------------------------------------------------------------------|-------|
| A_23_P21072  | 3.2 | 3.2  | 3.1  | 2.2  | RAB24  | RAB24,<br>member<br>RAS<br>oncogene<br>family<br>[Source:H<br>GNC<br>Symbol;Ac<br>c:9765]<br>[ENST0000<br>0495458]                    | 53917 |
| A_23_P54709  | 2.1 | 1.9  | 1.1  | 1.5  | RAB26  | Homo<br>sapiens<br>RAB26,<br>member<br>RAS<br>oncogene<br>family<br>(RAB26),<br>mRNA<br>[NM_0143<br>53]                               | 25837 |
| A_23_P54373  | 1.6 | 1.5  | -2.5 | -1.1 | RAB27A | Homo<br>sapiens<br>RAB27A,<br>member<br>RAS<br>oncogene<br>family<br>(RAB27A),<br>transcript<br>variant 1,<br>mRNA<br>[NM_0045<br>80] | 5873  |
| A_23_P107612 | 1.2 | -1.0 | -1.8 | -3.9 | RAB27B | Homo<br>sapiens<br>RAB27B,<br>member<br>RAS<br>oncogene<br>family<br>(RAB27B),<br>mRNA<br>[NM_0041<br>63]                             | 5874  |

|              |      |      |      |      |       |                                                                                                |      |
|--------------|------|------|------|------|-------|------------------------------------------------------------------------------------------------|------|
| A_32_P7204   | -1.1 | -1.5 | -1.1 | -2.9 | RAB28 | Homo sapiens RAB28, member RAS oncogene family (RAB28), transcript variant 2, mRNA [NM_004249] | 9364 |
| A_23_P125147 | 4.4  | 1.2  | 1.1  | 2.7  | RAB28 | Homo sapiens RAB28, member RAS oncogene family (RAB28), transcript variant 2, mRNA [NM_004249] | 9364 |
| A_23_P253949 | -1.0 | -2.7 | -1.0 | -1.0 | RAB2A | Homo sapiens RAB2A, member RAS oncogene family (RAB2A), transcript variant 1, mRNA [NM_002865] | 5862 |

|              |      |      |      |      |       |                                                                          |       |
|--------------|------|------|------|------|-------|--------------------------------------------------------------------------|-------|
| A_24_P236799 | -2.3 | 1.0  | 1.0  | 1.1  | RAB31 | Homo sapiens RAB31, member RAS oncogene family (RAB31), mRNA [NM_006868] | 11031 |
| A_23_P141688 | -1.1 | -4.4 | -3.3 | -3.1 | RAB31 | Homo sapiens RAB31, member RAS oncogene family (RAB31), mRNA [NM_006868] | 11031 |
| A_24_P303480 | 1.1  | 1.0  | -1.1 | -9.9 | RAB32 | Homo sapiens RAB32, member RAS oncogene family (RAB32), mRNA [NM_006834] | 10981 |
| A_23_P42375  | -1.0 | 1.0  | -1.1 | -3.1 | RAB32 | Homo sapiens RAB32, member RAS oncogene family (RAB32), mRNA [NM_006834] | 10981 |

|              |      |      |      |      |        |                                                                            |       |
|--------------|------|------|------|------|--------|----------------------------------------------------------------------------|-------|
| A_24_P268917 | -2.3 | -7.6 | -1.2 | 1.0  | RAB33B | Homo sapiens RAB33B, member RAS oncogene family (RAB33B), mRNA [NM_031296] | 83452 |
| A_23_P9565   | -2.4 | 1.1  | -1.3 | 1.1  | RAB33B | Homo sapiens RAB33B, member RAS oncogene family (RAB33B), mRNA [NM_031296] | 83452 |
| A_24_P50028  | -2.4 | 1.1  | -1.0 | -1.3 | RAB39  | Homo sapiens RAB39, member RAS oncogene family (RAB39), mRNA [NM_017516]   | 54734 |
| A_23_P108200 | 1.9  | -6.1 | 1.0  | 1.0  | RAB3A  | Homo sapiens RAB3A, member RAS oncogene family (RAB3A), mRNA [NM_002866]   | 5864  |



|              |      |      |      |      |         |                                                                                                  |       |
|--------------|------|------|------|------|---------|--------------------------------------------------------------------------------------------------|-------|
| A_32_P18668  | 1.9  | -3.0 | 1.8  | 1.5  | RAB3B   | Homo sapiens RAB3B, member RAS oncogene family (RAB3B), mRNA [NM_002867]                         | 5865  |
| A_24_P548966 | -1.0 | -1.1 | -1.1 | -2.6 | RAB3B   | Homo sapiens RAB3B, member RAS oncogene family (RAB3B), mRNA [NM_002867]                         | 5865  |
| A_23_P75800  | -8.6 | -1.1 | 1.1  | -3.0 | RAB3IL1 | Homo sapiens RAB3A interacting protein (rabin3)-like 1 (RAB3IL1), mRNA [NM_013401]               | 5866  |
| A_23_P396062 | 2.7  | 1.9  | -1.0 | -1.0 | RAB40C  | Homo sapiens RAB40C, member RAS oncogene family (RAB40C), transcript variant 2, mRNA [NM_021168] | 57799 |

|              |      |     |      |      |       |                                                                                                |        |
|--------------|------|-----|------|------|-------|------------------------------------------------------------------------------------------------|--------|
| A_24_P277295 | -1.5 | 1.0 | 1.0  | -3.2 | RAB43 | Homo sapiens RAB43, member RAS oncogene family (RAB43), transcript variant 1, mRNA [NM_198490] | 339122 |
| A_24_P122682 | 1.1  | 1.1 | -1.0 | -4.3 | RAB4A | Homo sapiens RAB4A, member RAS oncogene family (RAB4A), mRNA [NM_004578]                       | 5867   |
| A_23_P16116  | 1.2  | 1.4 | 2.4  | 1.2  | RAB4B | Homo sapiens RAB4B, member RAS oncogene family (RAB4B), mRNA [NM_016154]                       | 53916  |
| A_24_P208809 | 3.0  | 2.9 | 3.6  | 1.0  | RAB5A | Homo sapiens RAB5A, member RAS oncogene family (RAB5A), mRNA [NM_004162]                       | 5868   |

|              |     |      |      |       |       |                                                                                                |      |
|--------------|-----|------|------|-------|-------|------------------------------------------------------------------------------------------------|------|
| A_23_P410998 | 1.0 | 1.2  | -1.1 | -19.9 | RAB5B | Homo sapiens RAB5B, member RAS oncogene family (RAB5B), transcript variant 1, mRNA [NM_002868] | 5869 |
| A_23_P107211 | 2.5 | -3.6 | 1.4  | -7.4  | RAB5C | Homo sapiens RAB5C, member RAS oncogene family (RAB5C), transcript variant 1, mRNA [NM_201434] | 5878 |
| A_23_P203729 | 1.8 | 3.0  | 3.2  | 2.4   | RAB6A | Homo sapiens RAB6A, member RAS oncogene family (RAB6A), transcript variant 1, mRNA [NM_002869] | 5870 |

|              |      |      |      |     |       |                                                                                                |        |
|--------------|------|------|------|-----|-------|------------------------------------------------------------------------------------------------|--------|
| A_23_P109974 | 1.1  | -8.5 | -1.0 | 1.1 | RAB6B | Homo sapiens RAB6B, member RAS oncogene family (RAB6B), mRNA [NM_016577]                       | 51560  |
| A_24_P234572 | 2.5  | -1.1 | -1.7 | 1.6 | RAB7A | Homo sapiens RAB7A, member RAS oncogene family (RAB7A), mRNA [NM_004637]                       | 7879   |
| A_23_P61590  | -1.0 | 1.0  | 1.0  | 4.3 | RAB7B | Homo sapiens RAB7B, member RAS oncogene family (RAB7B), transcript variant 1, mRNA [NM_177403] | 338382 |

|              |      |      |     |      |        |                                                                                                       |      |
|--------------|------|------|-----|------|--------|-------------------------------------------------------------------------------------------------------|------|
| A_24_P234094 | -2.3 | -1.0 | 1.2 | 1.0  | RAB7L1 | Homo sapiens RAB7, member RAS oncogene family-like 1 (RAB7L1), transcript variant 1, mRNA [NM_003929] | 8934 |
| A_23_P126939 | 1.6  | 2.5  | 1.9 | 2.5  | RAB7L1 | Homo sapiens RAB7, member RAS oncogene family-like 1 (RAB7L1), transcript variant 1, mRNA [NM_003929] | 8934 |
| A_24_P190424 | -2.8 | 1.6  | 1.7 | -1.1 | RAB8A  | Homo sapiens RAB8A, member RAS oncogene family (RAB8A), mRNA [NM_005370]                              | 4218 |

|              |       |      |      |      |        |                                                                                                                  |       |
|--------------|-------|------|------|------|--------|------------------------------------------------------------------------------------------------------------------|-------|
| A_23_P317465 | -13.6 | 1.0  | -1.1 | -1.0 | RAB8B  | Homo sapiens RAB8B, member RAS oncogene family (RAB8B), mRNA [NM_016530]                                         | 51762 |
| A_24_P126139 | 1.0   | -4.6 | -1.1 | -1.1 | RAB9B  | Homo sapiens RAB9B, member RAS oncogene family (RAB9B), mRNA [NM_016370]                                         | 51209 |
| A_23_P406448 | 1.1   | -1.1 | -1.1 | -4.7 | RAB9B  | Homo sapiens RAB9B, member RAS oncogene family (RAB9B), mRNA [NM_016370]                                         | 51209 |
| A_32_P142013 | 3.1   | 2.4  | 1.3  | 2.8  | RABEP1 | Homo sapiens rabaptin, RAB GTPase binding effector protein 1 (RABEP1), transcript variant 2, mRNA [NM_001083585] | 9135  |

|              |     |      |     |     |        |                                                                                                               |       |
|--------------|-----|------|-----|-----|--------|---------------------------------------------------------------------------------------------------------------|-------|
| A_23_P78158  | 5.5 | 5.3  | 5.3 | 5.3 | RABEP1 | Homo sapiens rabaptin, RAB GTPase binding effector protein 1 (RABEP1), transcript variant 1, mRNA [NM_004703] | 9135  |
| A_24_P399174 | 1.1 | -5.3 | 1.0 | 1.1 | RABEP1 | Homo sapiens rabaptin, RAB GTPase binding effector protein 1 (RABEP1), transcript variant 1, mRNA [NM_004703] | 9135  |
| A_23_P61100  | 1.6 | 3.1  | 2.4 | 1.8 | RABEP2 | Homo sapiens rabaptin, RAB GTPase binding effector protein 2 (RABEP2), mRNA [NM_024816]                       | 79874 |

|              |      |      |      |      |          |                                                                                                         |       |
|--------------|------|------|------|------|----------|---------------------------------------------------------------------------------------------------------|-------|
| A_24_P386323 | -2.2 | -1.4 | -1.4 | -3.3 | RABEPK   | Homo sapiens Rab9 effector protein with kelch motifs (RABEPK), transcript variant 1, mRNA [NM_005833]   | 10244 |
| A_24_P252575 | -4.2 | -1.0 | -1.1 | -1.1 | RABGAP1  | Homo sapiens RAB GTPase activating protein 1 (RABGAP1), mRNA [NM_012197]                                | 23637 |
| A_23_P350895 | 1.0  | 2.5  | 1.0  | -1.0 | RABGAP1  | RAB GTPase activating protein 1 [Source:HGNC Symbol;Acc:17155] [ENST00000317419]                        | 23637 |
| A_23_P377267 | 1.0  | 2.9  | 2.6  | 2.6  | RABGAP1L | Homo sapiens RAB GTPase activating protein 1-like (RABGAP1L), transcript variant 4, mRNA [NM_001243765] | 9910  |



|              |     |     |     |      |          |                                                                                                      |       |
|--------------|-----|-----|-----|------|----------|------------------------------------------------------------------------------------------------------|-------|
| A_23_P200325 | 2.2 | 1.6 | 3.1 | 1.6  | RABGAP1L | Homo sapiens RAB GTPase activating protein 1-like (RABGAP1L), transcript variant 1, mRNA [NM_014857] | 9910  |
| A_24_P333525 | 2.4 | 3.5 | 2.4 | 2.3  | RABGAP1L | Homo sapiens RAB GTPase activating protein 1-like (RABGAP1L), transcript variant 1, mRNA [NM_014857] | 9910  |
| A_24_P337746 | 1.3 | 1.3 | 1.2 | -3.1 | RABGEF1  | Homo sapiens RAB guanine nucleotide exchange factor (GEF) 1 (RABGEF1), mRNA [NM_014504]              | 27342 |

|              |      |      |      |      |        |                                                                                                          |        |
|--------------|------|------|------|------|--------|----------------------------------------------------------------------------------------------------------|--------|
| A_23_P63503  | 1.6  | 2.9  | -1.7 | -1.5 | RABIF  | Homo sapiens RAB interacting factor (RABIF), mRNA [NM_002871]                                            | 5877   |
| A_24_P250650 | 3.2  | 1.9  | 2.0  | 1.2  | RABL2A | Homo sapiens RAB, member of RAS oncogene family-like 2A (RABL2A), transcript variant 1, mRNA [NM_013412] | 11159  |
| A_24_P911094 | -2.2 | 1.0  | -1.0 | -1.9 | RABL2A | RAB, member of RAS oncogene family-like 2A [Source:HGNC Symbol;Acc:9799] [ENST00000376439]               | 11159  |
| A_32_P221452 | 1.4  | -2.2 | 1.3  | -1.0 | RABL3  | Homo sapiens RAB, member of RAS oncogene family-like 3 (RABL3), mRNA [NM_173825]                         | 285282 |

|              |      |      |      |      |       |                                                                                                     |        |
|--------------|------|------|------|------|-------|-----------------------------------------------------------------------------------------------------|--------|
| A_32_P109057 | -1.2 | -2.6 | 2.0  | -1.3 | RABL3 | Homo sapiens RAB, member of RAS oncogene family-like 3 (RABL3), mRNA [NM_173825]                    | 285282 |
| A_23_P31584  | -2.0 | -2.4 | -2.6 | -1.5 | RABL5 | Homo sapiens RAB, member RAS oncogene family-like 5 (RABL5), transcript variant 1, mRNA [NM_022777] | 64792  |
| A_24_P286527 | -2.4 | -2.1 | 1.1  | -1.0 | RABL5 | Homo sapiens RAB, member RAS oncogene family-like 5 (RABL5), transcript variant 1, mRNA [NM_022777] | 64792  |

|              |     |     |      |      |      |                                                                                                                                                        |      |
|--------------|-----|-----|------|------|------|--------------------------------------------------------------------------------------------------------------------------------------------------------|------|
| A_32_P217709 | 1.1 | 1.1 | -1.4 | 2.1  | RAC1 | Homo sapiens ras-related C3 botulinum toxin substrate 1 (rho family, small GTP binding protein Rac1) (RAC1), transcript variant Rac1, mRNA [NM_006908] | 5879 |
| A_24_P194845 | 2.9 | 2.5 | 1.0  | -1.0 | RAC1 | Homo sapiens ras-related C3 botulinum toxin substrate 1 (rho family, small GTP binding protein Rac1) (RAC1), transcript variant Rac1, mRNA [NM_006908] | 5879 |

|              |     |     |      |     |      |                                                                                                                               |      |
|--------------|-----|-----|------|-----|------|-------------------------------------------------------------------------------------------------------------------------------|------|
| A_23_P218774 | 2.2 | 2.4 | 2.3  | 3.3 | RAC2 | Homo sapiens ras-related C3 botulinum toxin substrate 2 (rho family, small GTP binding protein Rac2) (RAC2), mRNA [NM_002872] | 5880 |
| A_23_P218770 | 2.8 | 3.0 | -1.1 | 4.6 | RAC2 | Homo sapiens ras-related C3 botulinum toxin substrate 2 (rho family, small GTP binding protein Rac2) (RAC2), mRNA [NM_002872] | 5880 |

|              |      |     |     |      |          |                                                                                                                               |       |
|--------------|------|-----|-----|------|----------|-------------------------------------------------------------------------------------------------------------------------------|-------|
| A_23_P125001 | -2.3 | 1.5 | 1.0 | 1.8  | RAC3     | Homo sapiens ras-related C3 botulinum toxin substrate 3 (rho family, small GTP binding protein Rac3) (RAC3), mRNA [NM_005052] | 5881  |
| A_32_P186474 | 1.9  | 2.0 | 2.0 | 1.0  | RACGAP1  | Homo sapiens Rac GTPase activating protein 1 (RACGAP1), transcript variant 1, mRNA [NM_013277]                                | 29127 |
| A_23_P65041  | 1.3  | 1.0 | 1.1 | -3.5 | RACGAP1P | Homo sapiens Rac GTPase activating protein 1 pseudogene (RACGAP1P), non-coding RNA [NR_026583]                                | 83956 |

|              |      |      |      |      |        |                                                                                               |       |
|--------------|------|------|------|------|--------|-----------------------------------------------------------------------------------------------|-------|
| A_23_P144697 | -1.1 | 1.3  | -2.7 | -1.9 | RAD1   | Homo sapiens RAD1 homolog (S. pombe) (RAD1), transcript variant 1, mRNA [NM_002853]           | 5810  |
| A_24_P22887  | 1.1  | -8.7 | -1.3 | -1.3 | RAD23A | Homo sapiens RAD23 homolog A (S. cerevisiae) (RAD23A), mRNA [NM_005053]                       | 5886  |
| A_24_P406664 | -1.3 | -9.5 | -1.4 | -1.5 | RAD23B | Homo sapiens RAD23 homolog B (S. cerevisiae) (RAD23B), transcript variant 1, mRNA [NM_002874] | 5887  |
| A_24_P226198 | 1.0  | -1.0 | -4.5 | -1.0 | RAD50  | Homo sapiens RAD50 homolog (S. cerevisiae) (RAD50), mRNA [NM_005732]                          | 10111 |

|              |      |       |      |       |        |                                                                                               |      |
|--------------|------|-------|------|-------|--------|-----------------------------------------------------------------------------------------------|------|
| A_23_P500873 | -2.3 | -1.0  | -3.4 | 1.5   | RAD51D | Homo sapiens RAD51 homolog D (S. cerevisiae) (RAD51D), transcript variant 4, mRNA [NM_133629] | 5892 |
| A_24_P40827  | 1.5  | -4.0  | -1.2 | 1.3   | RAD51D | Homo sapiens RAD51 homolog D (S. cerevisiae) (RAD51D), transcript variant 1, mRNA [NM_002878] | 5892 |
| A_23_P64990  | -1.1 | -1.7  | -1.5 | -18.3 | RAD52  | Homo sapiens RAD52 homolog (S. cerevisiae) (RAD52), mRNA [NM_134424]                          | 5893 |
| A_24_P21715  | 1.5  | -12.5 | -1.0 | -1.0  | RAD9A  | Homo sapiens RAD9 homolog A (S. pombe) (RAD9A), transcript variant 1, mRNA [NM_004584]        | 5883 |



|             |      |      |      |      |        |                                                                                                 |        |
|-------------|------|------|------|------|--------|-------------------------------------------------------------------------------------------------|--------|
| A_23_P6023  | -2.3 | -2.6 | -2.0 | 1.2  | RAE1   | RAE1 RNA export 1 homolog (S. pombe) [Source:HGNC Symbol;Accession:9828] [ENST00000371242]      | 8480   |
| A_23_P8253  | -4.3 | -1.1 | -1.8 | -1.1 | RAET1E | Homo sapiens retinoic acid early transcript 1E (RAET1E), transcript variant 1, mRNA [NM_139165] | 135250 |
| A_23_P64525 | -1.1 | -2.6 | -1.0 | 1.1  | RAG2   | Homo sapiens recombination activating gene 2 (RAG2), transcript variant 1, mRNA [NM_000536]     | 5897   |
| A_23_P77807 | -3.9 | 1.4  | -3.0 | -1.8 | RAI1   | Homo sapiens retinoic acid induced 1 (RAI1), mRNA [NM_030665]                                   | 10743  |

|              |      |       |      |      |        |                                                                                                    |       |
|--------------|------|-------|------|------|--------|----------------------------------------------------------------------------------------------------|-------|
| A_23_P254165 | 1.5  | -1.0  | -2.4 | -1.1 | RAI2   | Homo sapiens retinoic acid induced 2 (RAI2), transcript variant 2, mRNA [NM_021785]                | 10742 |
| A_24_P192262 | -1.1 | -14.8 | -1.1 | -1.1 | RALA   | Homo sapiens v-ral simian leukemia viral oncogene homolog A (ras related) (RALA), mRNA [NM_005402] | 5898  |
| A_23_P168479 | -1.0 | -1.0  | -3.2 | -1.0 | RALA   | Homo sapiens v-ral simian leukemia viral oncogene homolog A (ras related) (RALA), mRNA [NM_005402] | 5898  |
| A_23_P153084 | -1.0 | 1.2   | -2.4 | 3.8  | RALBP1 | Homo sapiens ralA binding protein 1 (RALBP1), mRNA [NM_006788]                                     | 10928 |

|              |      |      |       |      |          |                                                                                                                            |        |
|--------------|------|------|-------|------|----------|----------------------------------------------------------------------------------------------------------------------------|--------|
| A_24_P918843 | -2.3 | -2.1 | 1.0   | -1.2 | RALGAPA1 | Homo sapiens Ral GTPase activating protein, alpha subunit 1 (catalytic) (RALGAPA1), transcript variant 2, mRNA [NM_194301] | 253959 |
| A_23_P135184 | -1.1 | -1.5 | -36.4 | -1.5 | RALGDS   | Homo sapiens ral guanine nucleotide dissociation stimulator (RALGDS), transcript variant 2, mRNA [NM_001042368]            | 5900   |
| A_32_P221991 | 1.2  | 1.2  | -16.1 | -1.2 | RALGPS1  | Homo sapiens Ral GEF with PH domain and SH3 binding motif 1 (RALGPS1), transcript variant 1, mRNA [NM_014636]              | 9649   |

|              |       |     |      |      |         |                                                                                                                                                      |       |
|--------------|-------|-----|------|------|---------|------------------------------------------------------------------------------------------------------------------------------------------------------|-------|
| A_23_P390148 | 1.3   | 2.3 | 2.0  | -1.0 | RALGPS1 | Homo sapiens Ral GEF with PH domain and SH3 binding motif 1 (RALGPS1), transcript variant 1, mRNA [NM_014636]                                        | 9649  |
| A_23_P109235 | -14.4 | 1.2 | -1.8 | 1.1  | RALY    | Homo sapiens RNA binding protein, autoantigenic (hnRNP-associated with lethal yellow homolog (mouse)) (RALY), transcript variant 1, mRNA [NM_016732] | 22913 |
| A_23_P128126 | 1.1   | 1.1 | -3.2 | 1.1  | RAN     | RAN, member RAS oncogene family [Source:HGNC Symbol;Acc:9846] [ENST00000543796]                                                                      | 5901  |

|              |      |     |      |      |         |                                                                                            |        |
|--------------|------|-----|------|------|---------|--------------------------------------------------------------------------------------------|--------|
| A_23_P369733 | 2.5  | 4.0 | 2.8  | 2.4  | RANBP10 | Homo sapiens RAN binding protein 10 (RANBP10), mRNA [NM_020850]                            | 57610  |
| A_24_P350890 | -8.0 | 1.0 | -1.0 | -1.0 | RANBP2  | Homo sapiens RAN binding protein 2 (RANBP2), mRNA [NM_006267]                              | 5903   |
| A_24_P241862 | 2.0  | 2.7 | 1.3  | 2.8  | RANBP3  | Homo sapiens RAN binding protein 3 (RANBP3), transcript variant RANBP3-b, mRNA [NM_007320] | 8498   |
| A_23_P391207 | 3.6  | 1.3 | 3.5  | 3.8  | RANBP3L | Homo sapiens RAN binding protein 3-like (RANBP3L), transcript variant 2, mRNA [NM_145000]  | 202151 |

|             |      |       |      |      |         |                                                                                                      |       |
|-------------|------|-------|------|------|---------|------------------------------------------------------------------------------------------------------|-------|
| A_23_P55136 | -1.0 | -19.9 | -1.5 | -1.4 | RANGRF  | Homo sapiens RAN guanine nucleotide release factor (RANGRF), transcript variant 1, mRNA [NM_016492]  | 29098 |
| A_23_P51754 | -2.3 | -3.6  | -1.8 | -1.8 | RAP1A   | Homo sapiens RAP1A, member of RAS oncogene family (RAP1A), transcript variant 1, mRNA [NM_001010935] | 5906  |
| A_24_P36890 | -1.5 | 1.1   | -1.8 | -2.2 | RAP1GAP | Homo sapiens RAP1 GTPase activating protein (RAP1GAP), transcript variant 3, mRNA [NM_002885]        | 5909  |

|              |      |      |      |      |          |                                                                                                            |       |
|--------------|------|------|------|------|----------|------------------------------------------------------------------------------------------------------------|-------|
| A_32_P85813  | 1.1  | -6.2 | 1.5  | 1.1  | RAP1GDS1 | Homo sapiens RAP1, GTP-GDP dissociation stimulator 1 (RAP1GDS1), transcript variant 1, mRNA [NM_001100426] | 5910  |
| A_24_P374319 | 2.3  | 2.3  | 2.2  | 3.4  | RAP2C    | Homo sapiens RAP2C, member of RAS oncogene family (RAP2C), mRNA [NM_021183]                                | 57826 |
| A_23_P147826 | -1.5 | -5.3 | -1.7 | -1.3 | RAP2C    | Homo sapiens RAP2C, member of RAS oncogene family (RAP2C), mRNA [NM_021183]                                | 57826 |

|              |      |      |      |      |         |                                                                                                                  |       |
|--------------|------|------|------|------|---------|------------------------------------------------------------------------------------------------------------------|-------|
| A_23_P304237 | -1.9 | -3.8 | -1.7 | -6.2 | RAPGEF1 | Homo sapiens Rap guanine nucleotide exchange factor (GEF) 1 (RAPGEF1), transcript variant 2, mRNA [NM_198679]    | 2889  |
| A_24_P912587 | 24.1 | 5.3  | 23.8 | 24.4 | RAPGEF2 | Rap guanine nucleotide exchange factor (GEF) 2 [Source:HGNC Symbol;Acc:16854] [ENST00000503328]                  | 9693  |
| A_32_P393316 | 2.3  | 2.3  | 3.0  | 2.3  | RAPGEF3 | Homo sapiens Rap guanine nucleotide exchange factor (GEF) 3 (RAPGEF3), transcript variant 1, mRNA [NM_001098531] | 10411 |



|              |      |      |     |      |          |                                                                                                                  |       |
|--------------|------|------|-----|------|----------|------------------------------------------------------------------------------------------------------------------|-------|
| A_23_P17197  | -1.1 | -1.1 | 1.0 | -2.0 | RAPGEF4  | Homo sapiens Rap guanine nucleotide exchange factor (GEF) 4 (RAPGEF4), transcript variant 1, mRNA [NM_007023]    | 11069 |
| A_23_P152970 | 3.8  | 5.5  | 3.6 | 3.4  | RAPGEFL1 | Homo sapiens Rap guanine nucleotide exchange factor (GEF)-like 1 (RAPGEFL1), mRNA [NM_016339]                    | 51195 |
| A_23_P409966 | -3.8 | -1.0 | 1.4 | 1.0  | RAPH1    | Ras association (RalGDS/AF-6) and pleckstrin homology domains 1 [Source:HGNC Symbol;Acc:14436] [ENST00000453034] | 65059 |

|              |     |      |      |      |       |                                                                                                                              |       |
|--------------|-----|------|------|------|-------|------------------------------------------------------------------------------------------------------------------------------|-------|
| A_24_P929570 | 1.0 | -3.3 | -1.2 | -1.0 | RAPH1 | Homo sapiens Ras association (RalGDS/AF-6) and pleckstrin homology domains 1 (RAPH1), transcript variant 1, mRNA [NM_213589] | 65059 |
| A_32_P5251   | 1.7 | 3.5  | 1.6  | 1.1  | RARA  | Homo sapiens retinoic acid receptor, alpha (RARA), transcript variant 2, mRNA [NM_001024809]                                 | 5914  |
| A_23_P117125 | 1.2 | 2.4  | 2.2  | 1.1  | RARG  | Homo sapiens retinoic acid receptor, gamma (RARG), transcript variant 1, mRNA [NM_000966]                                    | 5916  |

|              |      |      |      |      |        |                                                                                                        |       |
|--------------|------|------|------|------|--------|--------------------------------------------------------------------------------------------------------|-------|
| A_24_P354257 | -1.4 | -7.9 | -1.2 | -1.0 | RASA2  | RAS p21 protein activator 2 [Source:HGNC Symbol;Accession:9872] [ENST00000286364]                      | 5922  |
| A_23_P385673 | 1.7  | 1.4  | -2.6 | 1.8  | RASA3  | Homo sapiens mRNA for Ins(1,3,4,5)P4-binding protein. [X89399]                                         | 22821 |
| A_23_P168449 | 1.9  | 1.0  | 2.0  | 2.5  | RASA4  | Homo sapiens RAS p21 protein activator 4 (RASA4), transcript variant 1, mRNA [NM_006989]               | 10156 |
| A_23_P139600 | 1.7  | 1.0  | -1.4 | -2.2 | RASAL1 | Homo sapiens RAS protein activator like 1 (GAP1 like) (RASAL1), transcript variant 2, mRNA [NM_004658] | 8437  |

|              |      |      |      |      |        |                                                                                           |        |
|--------------|------|------|------|------|--------|-------------------------------------------------------------------------------------------|--------|
| A_23_P79069  | 2.5  | 1.4  | 3.0  | 1.5  | RASAL3 | Homo sapiens RAS protein activator like 3 (RASAL3), mRNA [NM_022904]                      | 64926  |
| A_23_P118392 | 1.8  | 1.1  | 2.0  | 1.1  | RASD1  | Homo sapiens RAS, dexamethasone-induced 1 (RASD1), transcript variant 1, mRNA [NM_016084] | 51655  |
| A_24_P348006 | -1.5 | -1.4 | -1.7 | -2.7 | RASD1  | Homo sapiens RAS, dexamethasone-induced 1 (RASD1), transcript variant 1, mRNA [NM_016084] | 51655  |
| A_32_P231568 | 1.0  | -1.0 | 3.6  | -1.0 | RASEF  | Homo sapiens RAS and EF-hand domain containing (RASEF), mRNA [NM_152573]                  | 158158 |

|              |      |      |       |     |          |                                                                                                                           |        |
|--------------|------|------|-------|-----|----------|---------------------------------------------------------------------------------------------------------------------------|--------|
| A_23_P391344 | 2.6  | 2.4  | -1.8  | 3.6 | RASGEF1A | Homo sapiens RasGEF domain family, member 1A, mRNA (cDNA clone MGC:26821 IMAGE:4814750), complete cds. [BC022548]         | 221002 |
| A_24_P930432 | 1.0  | -6.8 | -1.8  | 1.2 | RASGEF1B | RasGEF domain family, member 1B [Source:HGNC Symbol;Acc:24881] [ENST00000395570]                                          | 153020 |
| A_23_P64058  | -1.1 | -1.3 | -12.3 | 1.2 | RASGRP2  | Homo sapiens RAS guanyl releasing protein 2 (calcium and DAG-regulated) (RASGRP2), transcript variant 2, mRNA [NM_153819] | 10235  |

|              |      |      |      |      |         |                                                                                                                           |        |
|--------------|------|------|------|------|---------|---------------------------------------------------------------------------------------------------------------------------|--------|
| A_24_P54390  | 2.4  | -5.7 | 1.9  | 1.9  | RASGRP3 | Homo sapiens RAS guanyl releasing protein 3 (calcium and DAG-regulated) (RASGRP3), transcript variant 2, mRNA [NM_170672] | 25780  |
| A_23_P165007 | -4.0 | -1.5 | -1.8 | -1.6 | RASGRP4 | Homo sapiens RAS guanyl releasing protein 4 (RASGRP4), transcript variant a, mRNA [NM_170604]                             | 115727 |
| A_32_P364462 | 1.1  | 1.4  | -1.5 | -3.9 | RASIP1  | Homo sapiens Ras interacting protein 1 (RASIP1), mRNA [NM_017805]                                                         | 54922  |

|              |      |      |      |      |         |                                                                                                                    |       |
|--------------|------|------|------|------|---------|--------------------------------------------------------------------------------------------------------------------|-------|
| A_23_P166400 | -1.5 | 1.3  | -3.9 | -2.3 | RASL10A | Homo sapiens RAS-like, family 10, member A (RASL10A), transcript variant 2, mRNA [NM_001007279]                    | 10633 |
| A_23_P69738  | -1.4 | -1.2 | -2.3 | -1.3 | RASL11B | Homo sapiens RAS-like, family 11, member B (RASL11B), mRNA [NM_023940]                                             | 65997 |
| A_23_P41066  | 1.9  | -1.1 | 2.9  | 1.7  | RASSF1  | Homo sapiens Ras association (RalGDS/AF-6) domain family member 1 (RASSF1), transcript variant C, mRNA [NM_170713] | 11186 |

|              |      |      |      |      |        |                                                                                                                    |       |
|--------------|------|------|------|------|--------|--------------------------------------------------------------------------------------------------------------------|-------|
| A_24_P148777 | -1.7 | -2.3 | -2.0 | -1.2 | RASSF1 | Homo sapiens Ras association (RalGDS/AF-6) domain family member 1 (RASSF1), transcript variant C, mRNA [NM_170713] | 11186 |
| A_23_P166087 | 1.3  | -1.0 | -1.1 | -3.2 | RASSF2 | Homo sapiens Ras association (RalGDS/AF-6) domain family member 2 (RASSF2), transcript variant 1, mRNA [NM_014737] | 9770  |
| A_24_P288448 | 6.5  | 6.7  | 12.2 | 7.3  | RASSF2 | Ras association (RalGDS/AF-6) domain family member 2 [Source:HGNC Symbol;Acc:9883] [ENST00000478553]               | 9770  |



|              |     |      |      |      |        |                                                                                                                    |        |
|--------------|-----|------|------|------|--------|--------------------------------------------------------------------------------------------------------------------|--------|
| A_23_P2397   | 2.5 | 2.4  | -1.1 | -1.1 | RASSF3 | Homo sapiens Ras association (RalGDS/AF-6) domain family member 3 (RASSF3), transcript variant 1, mRNA [NM_178169] | 283349 |
| A_24_P171268 | 1.1 | -2.0 | -1.0 | -2.0 | RASSF5 | Homo sapiens Ras association (RalGDS/AF-6) domain family member 5 (RASSF5), transcript variant 1, mRNA [NM_182663] | 83593  |

|              |       |      |      |      |        |                                                                                                                                    |       |
|--------------|-------|------|------|------|--------|------------------------------------------------------------------------------------------------------------------------------------|-------|
| A_23_P47116  | -32.3 | 2.2  | -1.3 | 1.6  | RASSF7 | Homo sapiens Ras association (RalGDS/AF-6) domain family (N-terminal) member 7 (RASSF7), transcript variant 1, mRNA [NM_003475]    | 8045  |
| A_24_P407224 | 1.0   | -1.0 | -3.7 | -1.1 | RASSF8 | Homo sapiens Ras association (RalGDS/AF-6) domain family (N-terminal) member 8 (RASSF8), transcript variant 1, mRNA [NM_001164746] | 11228 |

|              |      |      |      |      |        |                                                                                                           |        |
|--------------|------|------|------|------|--------|-----------------------------------------------------------------------------------------------------------|--------|
| A_24_P199251 | 1.0  | -3.4 | -1.1 | -1.0 | RASSF9 | Homo sapiens Ras association (RalGDS/AF-6) domain family (N-terminal) member 9 (RASSF9), mRNA [NM_005447] | 9182   |
| A_24_P126557 | -1.5 | -5.4 | -1.8 | 1.0  | RAVER1 | Homo sapiens ribonucleo protein, PTB-binding 1 (RAVER1), mRNA [NM_133452]                                 | 125950 |
| A_23_P74215  | -1.1 | -2.0 | -2.9 | -1.3 | RAVER2 | Homo sapiens cDNA FLJ10770 fis, clone NT2RP4000159. [AK001632]                                            | 55225  |
| A_23_P56146  | 1.2  | 2.4  | 1.0  | -1.1 | RAX2   | Homo sapiens retina and anterior neural fold homeobox 2 (RAX2), mRNA [NM_032753]                          | 84839  |

|              |      |      |      |      |             |                                                                                            |           |
|--------------|------|------|------|------|-------------|--------------------------------------------------------------------------------------------|-----------|
| A_23_P56150  | -1.6 | 1.6  | 1.6  | -2.4 | RAX2        | Homo sapiens retina and anterior neural fold homeobox 2 (RAX2), mRNA [NM_032753]           | 84839     |
| A_24_P102636 | -3.3 | -4.1 | 1.6  | 1.6  | RB1         | Homo sapiens retinoblastoma 1 (RB1), mRNA [NM_000321]                                      | 5925      |
| A_24_P72394  | -1.9 | -1.2 | -4.1 | -2.2 | RBAK        | Homo sapiens RB-associated KRAB zinc finger (RBAK), transcript variant 1, mRNA [NM_021163] | 57786     |
| A_32_P171143 | -1.4 | -1.6 | -2.1 | -1.0 | RBAK-LOC389 | Homo sapiens RBAK-LOC389458 readthrough (RBAK-LOC389458), mRNA [NM_001204513]              | 100533952 |

|              |      |      |      |      |       |                                                                                               |      |
|--------------|------|------|------|------|-------|-----------------------------------------------------------------------------------------------|------|
| A_24_P468810 | -3.5 | -2.3 | 1.0  | 1.1  | RBBP4 | Homo sapiens retinoblastoma binding protein 4 (RBBP4), transcript variant 1, mRNA [NM_005610] | 5928 |
| A_24_P912095 | -2.1 | 1.2  | 1.0  | -1.6 | RBBP4 | Homo sapiens retinoblastoma binding protein 4 (RBBP4), transcript variant 1, mRNA [NM_005610] | 5928 |
| A_23_P326691 | 2.9  | 3.0  | -1.4 | 1.7  | RBBP4 | Homo sapiens retinoblastoma binding protein 4 (RBBP4), transcript variant 1, mRNA [NM_005610] | 5928 |
| A_23_P201887 | -1.0 | -1.0 | -1.0 | -3.7 | RBBP5 | Homo sapiens retinoblastoma binding protein 5 (RBBP5), transcript variant 1, mRNA [NM_005057] | 5929 |

|              |      |      |      |      |       |                                                                                               |       |
|--------------|------|------|------|------|-------|-----------------------------------------------------------------------------------------------|-------|
| A_23_P363206 | -1.9 | 1.0  | 2.4  | -5.3 | RBBP6 | Homo sapiens retinoblastoma binding protein 6 (RBBP6), transcript variant 1, mRNA [NM_006910] | 5930  |
| A_23_P252371 | 3.3  | 4.3  | 3.1  | 3.1  | RBBP8 | Homo sapiens retinoblastoma binding protein 8 (RBBP8), transcript variant 1, mRNA [NM_002894] | 5932  |
| A_23_P359504 | -2.2 | -2.2 | -3.9 | -2.4 | RBBP9 | Homo sapiens retinoblastoma binding protein (RBBP9) mRNA, complete cds. [AF039564]            | 10741 |

|              |      |      |     |     |        |                                                                                                                                               |       |
|--------------|------|------|-----|-----|--------|-----------------------------------------------------------------------------------------------------------------------------------------------|-------|
| A_23_P166051 | 3.4  | 10.9 | 6.9 | 1.0 | RBCK1  | Homo sapiens RanBP-type and C3HC4-type zinc finger containing 1 (RBCK1), transcript variant 2, mRNA [NM_031229]                               | 10616 |
| A_23_P153086 | -1.3 | 1.5  | 1.9 | 2.3 | RBFA   | Homo sapiens ribosome binding factor A (putative) (RBFA), nuclear gene encoding mitochondrial protein, transcript variant 1, mRNA [NM_024805] | 79863 |
| A_23_P140858 | 2.3  | 2.1  | 3.4 | 1.1 | RBFOX1 | Homo sapiens RNA binding protein, fox-1 homolog (C. elegans) 1 (RBFOX1), transcript variant 4, mRNA [NM_018723]                               | 54715 |

|              |      |      |      |      |        |                                                                                                                    |        |
|--------------|------|------|------|------|--------|--------------------------------------------------------------------------------------------------------------------|--------|
| A_24_P147242 | 50.8 | 50.4 | 49.4 | 3.6  | RBFOX1 | Homo sapiens RNA binding protein, fox-1 homolog (C. elegans) 1 (RBFOX1), transcript variant 3, mRNA [NM_145893]    | 54715  |
| A_23_P103099 | -1.2 | 1.3  | 1.2  | 2.2  | RBFOX2 | Homo sapiens RNA binding protein, fox-1 homolog (C. elegans) 2 (RBFOX2), transcript variant 1, mRNA [NM_001031695] | 23543  |
| A_24_P142343 | -1.3 | 1.4  | 1.3  | -3.5 | RBFOX3 | Homo sapiens RNA binding protein, fox-1 homolog (C. elegans) 3 (RBFOX3), mRNA [NM_001082575]                       | 146713 |



|              |      |      |      |      |      |                                                                                           |       |
|--------------|------|------|------|------|------|-------------------------------------------------------------------------------------------|-------|
| A_23_P9523   | -1.5 | -1.6 | -1.1 | -2.1 | RBKS | Homo sapiens ribokinase (RBKS), mRNA [NM_022128]                                          | 64080 |
| A_24_P276102 | -3.1 | 1.1  | -9.5 | 1.1  | RBL1 | Homo sapiens retinoblast oma-like 1 (p107) (RBL1), transcript variant 2, mRNA [NM_183404] | 5933  |
| A_23_P28733  | 1.0  | -2.2 | -1.3 | -1.1 | RBL1 | Homo sapiens retinoblast oma-like 1 (p107) (RBL1), transcript variant 1, mRNA [NM_002895] | 5933  |
| A_23_P26413  | 2.1  | 1.8  | 1.5  | 1.7  | RBL2 | Homo sapiens retinoblast oma-like 2 (p130) (RBL2), mRNA [NM_005611]                       | 5934  |

|              |      |      |      |      |        |                                                                                           |       |
|--------------|------|------|------|------|--------|-------------------------------------------------------------------------------------------|-------|
| A_23_P125815 | 13.3 | 13.6 | 2.4  | 4.0  | RBM10  | Homo sapiens RNA binding motif protein 10 (RBM10), transcript variant 1, mRNA [NM_005676] | 8241  |
| A_23_P342000 | -4.5 | -6.9 | -1.2 | 1.3  | RBM11  | Homo sapiens RNA binding motif protein 11 (RBM11), mRNA [NM_144770]                       | 54033 |
| A_23_P502832 | -3.1 | -1.2 | -4.0 | -1.2 | RBM12  | Homo sapiens RNA binding motif protein 12 (RBM12), transcript variant 1, mRNA [NM_006047] | 10137 |
| A_24_P945181 | -6.0 | -1.0 | -1.1 | 1.2  | RBM15B | Homo sapiens RNA binding motif protein 15B (RBM15B), mRNA [NM_013286]                     | 29890 |

|              |      |     |      |      |        |                                                                                           |       |
|--------------|------|-----|------|------|--------|-------------------------------------------------------------------------------------------|-------|
| A_23_P121405 | 3.0  | 1.4 | 2.3  | 2.0  | RBM15B | Homo sapiens RNA binding motif protein 15B (RBM15B), mRNA [NM_013286]                     | 29890 |
| A_23_P35645  | -1.1 | 1.3 | -6.1 | -1.1 | RBM17  | Homo sapiens RNA binding motif protein 17 (RBM17), transcript variant 1, mRNA [NM_032905] | 84991 |
| A_23_P20777  | -4.3 | 1.0 | -4.6 | -1.8 | RBM18  | Homo sapiens RNA binding motif protein 18 (RBM18), transcript variant 1, mRNA [NM_033117] | 92400 |
| A_24_P226867 | 1.1  | 4.7 | 4.6  | 4.7  | RBM18  | Homo sapiens RNA binding motif protein 18 (RBM18), transcript variant 1, mRNA [NM_033117] | 92400 |

|              |      |      |      |      |       |                                                                                              |       |
|--------------|------|------|------|------|-------|----------------------------------------------------------------------------------------------|-------|
| A_23_P312344 | -1.1 | -1.3 | -6.3 | -1.4 | RBM19 | Homo sapiens RNA binding motif protein 19 (RBM19), transcript variant 2, mRNA [NM_016196]    | 9904  |
| A_24_P207091 | 10.6 | 10.3 | 11.7 | 9.0  | RBM23 | Homo sapiens RNA binding motif protein 23 (RBM23), transcript variant 1, mRNA [NM_001077351] | 55147 |
| A_24_P926189 | -1.0 | -5.7 | -1.0 | -1.0 | RBM26 | RNA binding motif protein 26 [Source:HGNC Symbol;Acc:20327] [ENST00000472143]                | 64062 |

|              |      |      |      |       |           |                                                                                                    |           |
|--------------|------|------|------|-------|-----------|----------------------------------------------------------------------------------------------------|-----------|
| A_32_P125803 | 1.0  | 1.0  | 2.9  | 1.0   | RBM26-AS1 | Homo sapiens<br>RBM26 antisense RNA 1 (non-protein coding) (RBM26-AS1), non-coding RNA [NR_038991] | 100505538 |
| A_24_P927222 | -1.1 | -1.3 | -1.3 | -3.2  | RBM27     | Homo sapiens RNA binding motif protein 27 (RBM27), mRNA [NM_018989]                                | 54439     |
| A_23_P168629 | -4.7 | 1.9  | 1.9  | 1.0   | RBM28     | Homo sapiens RNA binding motif protein 28 (RBM28), transcript variant 1, mRNA [NM_018077]          | 55131     |
| A_23_P215534 | 1.2  | 1.2  | 1.2  | -14.0 | RBM33     | Homo sapiens RNA binding motif protein 33 (RBM33), mRNA [NM_053043]                                | 155435    |

|              |      |      |      |      |       |                                                                                           |       |
|--------------|------|------|------|------|-------|-------------------------------------------------------------------------------------------|-------|
| A_23_P436476 | -1.8 | 1.0  | -1.0 | -3.5 | RBM34 | Homo sapiens RNA binding motif protein 34 (RBM34), transcript variant 1, mRNA [NM_015014] | 23029 |
| A_24_P418086 | -1.0 | -4.5 | -1.1 | -1.0 | RBM34 | Homo sapiens RNA binding motif protein 34 (RBM34), transcript variant 1, mRNA [NM_015014] | 23029 |
| A_24_P14485  | -1.2 | -3.1 | -2.1 | 1.6  | RBM38 | Homo sapiens RNA binding motif protein 38 (RBM38), transcript variant 1, mRNA [NM_017495] | 55544 |
| A_23_P17430  | 1.0  | -2.1 | -1.0 | 1.1  | RBM38 | Homo sapiens RNA binding motif protein 38 (RBM38), transcript variant 1, mRNA [NM_017495] | 55544 |

|              |      |      |      |      |       |                                                                                           |        |
|--------------|------|------|------|------|-------|-------------------------------------------------------------------------------------------|--------|
| A_23_P13033  | -1.5 | -1.6 | -2.1 | -1.2 | RBM4  | Homo sapiens RNA binding motif protein 4 (RBM4), transcript variant 1, mRNA [NM_002896]   | 5936   |
| A_24_P404807 | 2.8  | 2.2  | 1.8  | 2.4  | RBM41 | Homo sapiens RNA binding motif protein 41 (RBM41), transcript variant 1, mRNA [NM_018301] | 55285  |
| A_32_P135091 | 1.9  | -3.6 | 2.2  | 2.3  | RBM41 | Homo sapiens RNA binding motif protein 41 (RBM41), transcript variant 1, mRNA [NM_018301] | 55285  |
| A_32_P496952 | -1.4 | 1.4  | -1.0 | -3.1 | RBM43 | Homo sapiens RNA binding motif protein 43 (RBM43), mRNA [NM_198557]                       | 375287 |

|              |     |      |      |      |       |                                                                                           |        |
|--------------|-----|------|------|------|-------|-------------------------------------------------------------------------------------------|--------|
| A_23_P142994 | 1.1 | 1.1  | 1.0  | -6.4 | RBM45 | Homo sapiens RNA binding motif protein 45 (RBM45), mRNA [NM_152945]                       | 129831 |
| A_24_P226108 | 1.0 | -2.5 | 1.0  | 1.0  | RBM47 | Homo sapiens RNA binding motif protein 47 (RBM47), transcript variant 2, mRNA [NM_019027] | 54502  |
| A_32_P62571  | 1.1 | -3.2 | -1.1 | -1.0 | RBM8A | Homo sapiens RNA binding motif protein 8A (RBM8A), mRNA [NM_005105]                       | 9939   |
| A_24_P79955  | 1.9 | 2.5  | 2.5  | 2.5  | RBM8A | Homo sapiens RNA binding motif protein 8A (RBM8A), mRNA [NM_005105]                       | 9939   |



|             |      |     |     |      |       |                                                                                                                       |       |
|-------------|------|-----|-----|------|-------|-----------------------------------------------------------------------------------------------------------------------|-------|
| A_23_P36496 | -1.0 | 5.0 | 4.0 | 4.1  | RBMS1 | Homo sapiens RNA binding motif, single stranded interacting protein 1 (RBMS1), transcript variant 1, mRNA [NM_016836] | 5937  |
| A_23_P10995 | 1.8  | 1.4 | 1.0 | -2.3 | RBMS3 | Homo sapiens RNA binding motif, single stranded interacting protein 3 (RBMS3), transcript variant 2, mRNA [NM_014483] | 27303 |
| A_23_P96420 | 1.1  | 2.3 | 4.1 | 1.9  | RBMX  | Homo sapiens RNA binding motif protein, X-linked (RBMX), transcript variant 1, mRNA [NM_002139]                       | 27316 |

|              |      |      |      |      |        |                                                                                                          |        |
|--------------|------|------|------|------|--------|----------------------------------------------------------------------------------------------------------|--------|
| A_24_P824592 | -2.9 | -1.0 | -3.5 | 1.1  | RBMX   | Homo sapiens RNA binding motif protein, X-linked (RBMX), transcript variant 1, mRNA [NM_002139]          | 27316  |
| A_32_P193646 | -1.0 | -1.1 | -3.2 | -1.1 | RBMX   | Homo sapiens RNA binding motif protein, X-linked (RBMX), transcript variant 1, mRNA [NM_002139]          | 27316  |
| A_24_P359545 | -1.0 | -1.1 | -2.2 | -3.1 | RBMXL1 | Homo sapiens RNA binding motif protein, X-linked-like 1 (RBMXL1), transcript variant 2, mRNA [NM_019610] | 494115 |

|              |      |      |      |       |         |                                                                                                                       |        |
|--------------|------|------|------|-------|---------|-----------------------------------------------------------------------------------------------------------------------|--------|
| A_23_P61967  | -2.0 | 1.0  | -1.1 | -17.0 | RBMXL2  | Homo sapiens RNA binding motif protein, X-linked-like 2 (RBMXL2), mRNA [NM_014469]                                    | 27288  |
| A_23_P171397 | -2.9 | -2.8 | -2.9 | -4.3  | RBMX1B  | Homo sapiens RNA binding motif protein, Y-linked, family 1, member B (RBMX1B), mRNA [NM_001006121]                    | 378948 |
| A_24_P794648 | -6.7 | -1.7 | -2.2 | -1.7  | RBMX2EP | Homo sapiens RNA binding motif protein, Y-linked, family 2, member E pseudogene (RBMX2EP), non-coding RNA [NR_001574] | 159125 |

|              |      |      |      |      |         |                                                                                                                                    |        |
|--------------|------|------|------|------|---------|------------------------------------------------------------------------------------------------------------------------------------|--------|
| A_23_P424689 | -3.1 | -9.3 | 1.0  | -1.0 | RBMY2FP | Homo sapiens RNA binding motif protein, Y-linked, family 2, member F pseudogene (RBMY2FP), non-coding RNA [NR_002193]              | 159162 |
| A_24_P165423 | 5.3  | 5.2  | 3.6  | 3.7  | RBP7    | Homo sapiens retinol binding protein 7, cellular (RBP7), mRNA [NM_052960]                                                          | 116362 |
| A_23_P29994  | -1.3 | -3.7 | -1.4 | -1.5 | RBPJ    | Homo sapiens recombination signal binding protein for immunoglobulin kappa J region (RBPJ), transcript variant 4, mRNA [NM_203284] | 3516   |

|              |      |      |      |     |       |                                                                                                            |       |
|--------------|------|------|------|-----|-------|------------------------------------------------------------------------------------------------------------|-------|
| A_23_P71316  | 1.0  | 3.6  | 1.9  | 1.3 | RBPMS | Homo sapiens RNA binding protein with multiple splicing (RBPMS), transcript variant 3, mRNA [NM_001008712] | 11030 |
| A_23_P375147 | 2.6  | 1.2  | 1.1  | 2.0 | RC3H2 | ring finger and CCCH-type domains 2 [Source:HGNC Symbol;Acc:21461] [ENST00000373670]                       | 54542 |
| A_32_P156851 | -1.2 | -1.2 | -1.3 | 3.3 | RCAN2 | Homo sapiens regulator of calcineurin 2 (RCAN2), transcript variant 1, mRNA [NM_005822]                    | 10231 |

|              |      |      |       |      |        |                                                                                                                               |      |
|--------------|------|------|-------|------|--------|-------------------------------------------------------------------------------------------------------------------------------|------|
| A_23_P14105  | -1.3 | -1.1 | -6.5  | -1.4 | RCBTB2 | Homo sapiens regulator of chromosome condensation (RCC1) and BTB (POZ) domain containing protein 2 (RCBTB2), mRNA [NM_001268] | 1102 |
| A_24_P930442 | -1.7 | -2.7 | -7.3  | -1.5 | RCC1   | Homo sapiens regulator of chromosome condensation 1 (RCC1), transcript variant 1, mRNA [NM_001048194]                         | 1104 |
| A_23_P46309  | -9.2 | -1.0 | -10.8 | -1.0 | RCC1   | Homo sapiens regulator of chromosome condensation 1 (RCC1), transcript variant 4, mRNA [NM_001048199]                         | 1104 |

|              |      |      |      |      |       |                                                                                                    |        |
|--------------|------|------|------|------|-------|----------------------------------------------------------------------------------------------------|--------|
| A_23_P74950  | 4.8  | 4.8  | 4.9  | 4.8  | RCC2  | Homo sapiens regulator of chromosome condensation 2 (RCC2), transcript variant 1, mRNA [NM_018715] | 55920  |
| A_23_P13222  | 1.8  | -1.3 | 2.4  | 1.3  | RCN1  | Homo sapiens reticulocalbin 1, EF-hand calcium binding domain (RCN1), mRNA [NM_002901]             | 5954   |
| A_32_P175539 | -1.0 | -1.0 | -1.1 | -2.9 | RCN2  | Homo sapiens reticulocalbin 2, EF-hand calcium binding domain (RCN2), mRNA [NM_002902]             | 5955   |
| A_23_P24397  | 3.0  | 1.6  | 1.8  | -1.8 | RCOR2 | Homo sapiens REST corepressor 2 (RCOR2), mRNA [NM_173587]                                          | 283248 |

|              |      |      |      |      |      |                                                                                     |        |
|--------------|------|------|------|------|------|-------------------------------------------------------------------------------------|--------|
| A_24_P849628 | 3.4  | -1.5 | -2.0 | 1.4  | RDBP | Homo sapiens RD RNA binding protein (RDBP), mRNA [NM_002904]                        | 7936   |
| A_23_P50291  | 1.8  | 2.4  | -1.7 | -1.3 | RDH8 | Homo sapiens retinol dehydrogenase 8 (all-trans) (RDH8), mRNA [NM_015725]           | 50700  |
| A_23_P141447 | -4.2 | 1.0  | -1.0 | 1.0  | RDM1 | Homo sapiens RAD52 motif 1 (RDM1), transcript variant 2, mRNA [NM_001034836]        | 201299 |
| A_24_P344087 | -2.1 | 1.4  | 1.5  | 1.0  | REC8 | Homo sapiens REC8 homolog (yeast) (REC8), transcript variant 2, mRNA [NM_001048205] | 9985   |



|              |      |      |      |     |        |                                                                                                             |      |
|--------------|------|------|------|-----|--------|-------------------------------------------------------------------------------------------------------------|------|
| A_24_P415208 | -8.9 | 2.2  | -1.2 | 2.2 | RECK   | reversion-inducing-cysteine-rich protein with kazal motifs [Source:HGNC Symbol;Acc:11345] [ENST00000475774] | 8434 |
| A_23_P83028  | 1.1  | 1.0  | 1.0  | 2.7 | RECK   | Homo sapiens reversion-inducing-cysteine-rich protein with kazal motifs (RECK), mRNA [NM_021111]            | 8434 |
| A_23_P71558  | -2.0 | -1.3 | -3.1 | 1.0 | RECQL4 | Homo sapiens RecQ protein-like 4 (RECQL4), mRNA [NM_004260]                                                 | 9401 |

|              |      |      |      |      |       |                                                                                                                                        |        |
|--------------|------|------|------|------|-------|----------------------------------------------------------------------------------------------------------------------------------------|--------|
| A_23_P96285  | 1.5  | -1.3 | 1.9  | -2.2 | REEP1 | Homo sapiens receptor accessory protein 1 (REEP1), nuclear gene encoding mitochondrial protein, transcript variant 2, mRNA [NM_022912] | 65055  |
| A_23_P19182  | -1.6 | 1.0  | -4.3 | -1.6 | REEP2 | Homo sapiens receptor accessory protein 2 (REEP2), mRNA [NM_016606]                                                                    | 51308  |
| A_24_P286845 | 1.6  | 1.7  | 4.0  | 1.9  | REEP3 | Homo sapiens receptor accessory protein 3 (REEP3), mRNA [NM_00101330]                                                                  | 221035 |
| A_23_P75028  | 3.5  | 2.6  | 5.8  | -2.5 | REEP3 | Homo sapiens receptor accessory protein 3 (REEP3), mRNA [NM_00101330]                                                                  | 221035 |

|             |       |      |      |      |       |                                                                                                         |       |
|-------------|-------|------|------|------|-------|---------------------------------------------------------------------------------------------------------|-------|
| A_23_P90510 | -12.0 | 1.1  | -2.5 | -1.8 | REEP6 | Homo sapiens receptor accessory protein 6 (REEP6), mRNA [NM_138393]                                     | 92840 |
| A_23_P90743 | 1.5   | 1.6  | 2.4  | 1.0  | REG1A | Homo sapiens regenerating islet-derived 1 alpha (REG1A), mRNA [NM_002909]                               | 5967  |
| A_24_P58673 | 1.9   | -1.8 | -2.4 | -1.3 | REG4  | Homo sapiens regenerating islet-derived family, member 4 (REG4), transcript variant 2, mRNA [NM_032044] | 83998 |
| A_23_P56938 | -1.3  | -1.8 | -2.1 | -1.3 | REL   | Homo sapiens v-rel reticuloendotheliosis viral oncogene homolog (avian) (REL), mRNA [NM_002908]         | 5966  |

|              |      |      |      |      |      |                                                                                                                             |        |
|--------------|------|------|------|------|------|-----------------------------------------------------------------------------------------------------------------------------|--------|
| A_24_P937256 | -1.2 | 1.7  | 8.4  | -1.2 | RELA | Homo sapiens v-rel reticuloendotheliosis viral oncogene homolog A (avian) (RELA), transcript variant 4, mRNA [NM_001243985] | 5970   |
| A_24_P38951  | 1.8  | 2.5  | 2.5  | 2.2  | RELT | Homo sapiens RELT tumor necrosis factor receptor (RELT), transcript variant 1, mRNA [NM_032871]                             | 84957  |
| A_23_P151624 | 2.4  | -1.0 | -3.0 | -7.3 | REM2 | Homo sapiens RAS (RAD and GEM)-like GTP binding 2 (REM2), mRNA [NM_173527]                                                  | 161253 |
| A_23_P34637  | 4.8  | -1.4 | 2.7  | 3.4  | REN  | Homo sapiens renin (REN), mRNA [NM_000537]                                                                                  | 5972   |

|              |      |      |      |      |        |                                                                                                        |       |
|--------------|------|------|------|------|--------|--------------------------------------------------------------------------------------------------------|-------|
| A_23_P137157 | -2.1 | -1.1 | 1.6  | -1.7 | RENBP  | Homo sapiens renin binding protein (RENBP), mRNA [NM_002910]                                           | 5973  |
| A_24_P166645 | 5.5  | 2.4  | 2.1  | 1.7  | REPIN1 | Homo sapiens replication initiator 1 (REPIN1), transcript variant 2, mRNA [NM_014374]                  | 29803 |
| A_23_P70748  | 3.0  | 1.4  | -1.6 | -2.3 | REPS1  | Homo sapiens RALBP1 associated Eps domain containing 1 (REPS1), transcript variant 1, mRNA [NM_031922] | 85021 |

|              |      |       |      |      |      |                                                                                                            |       |
|--------------|------|-------|------|------|------|------------------------------------------------------------------------------------------------------------|-------|
| A_24_P79591  | 1.1  | -16.0 | 1.2  | 1.1  | RER1 | Homo sapiens RER1 retention in endoplasmic reticulum 1 homolog (S. cerevisiae) (RER1), mRNA [NM_007033]    | 11079 |
| A_24_P342591 | 1.2  | 1.6   | -1.0 | -2.6 | RERE | Homo sapiens arginine-glutamic acid dipeptide (RE) repeats (RERE), transcript variant 1, mRNA [NM_012102]  | 473   |
| A_24_P321525 | -1.1 | 1.1   | 1.4  | -2.5 | RERG | Homo sapiens RAS-like, estrogen-regulated, growth inhibitor (RERG), transcript variant 1, mRNA [NM_032918] | 85004 |

|              |      |      |      |      |        |                                                                                                  |        |
|--------------|------|------|------|------|--------|--------------------------------------------------------------------------------------------------|--------|
| A_24_P59236  | -6.2 | 1.1  | 1.2  | 1.1  | RESP18 | Homo sapiens regulated endocrine-specific protein 18 homolog (rat) (RESP18), mRNA [NM_001007089] | 389075 |
| A_24_P246787 | 8.9  | 3.0  | 3.5  | -1.2 | REST   | Homo sapiens RE1-silencing transcription factor (REST), transcript variant 1, mRNA [NM_005612]   | 5978   |
| A_24_P299507 | 2.4  | -1.1 | -1.1 | -1.2 | REST   | Human neural-restrictive silencer factor, splice variant mRNA, partial cds. [U13877]             | 5978   |
| A_23_P202245 | -1.3 | -1.0 | -1.1 | -2.9 | RET    | Homo sapiens ret proto-oncogene (RET), transcript variant 2, mRNA [NM_020975]                    | 5979   |

|              |       |      |      |     |        |                                                                                             |       |
|--------------|-------|------|------|-----|--------|---------------------------------------------------------------------------------------------|-------|
| A_23_P92196  | 1.4   | -2.1 | 1.7  | 1.4 | RETNLB | Homo sapiens resistin like beta (RETNLB), mRNA [NM_032579]                                  | 84666 |
| A_24_P291426 | -19.8 | 1.0  | -1.1 | 1.0 | REV1   | Homo sapiens REV1 homolog (S. cerevisiae) (REV1), transcript variant 1, mRNA [NM_016316]    | 51455 |
| A_24_P256325 | -1.1  | 1.7  | 2.0  | 1.1 | REV1   | Homo sapiens REV1 homolog (S. cerevisiae) (REV1), transcript variant 2, mRNA [NM_001037872] | 51455 |
| A_32_P390781 | 1.4   | -2.5 | -2.7 | 1.2 | REXO1  | Homo sapiens REX1, RNA exonuclease 1 homolog (S. cerevisiae) (REXO1), mRNA [NM_020695]      | 57455 |



|              |      |      |      |      |         |                                                                                                         |        |
|--------------|------|------|------|------|---------|---------------------------------------------------------------------------------------------------------|--------|
| A_23_P428373 | 1.2  | 1.2  | 2.4  | -1.1 | REXO1L1 | Homo sapiens REX1, RNA exonuclease 1 homolog (S. cerevisiae)-like 1 (REXO1L1), mRNA [NM_172239]         | 254958 |
| A_23_P93823  | -1.0 | -1.1 | -1.1 | -6.7 | RFC2    | Homo sapiens replication factor C (activator 1) 2, 40kDa (RFC2), transcript variant 1, mRNA [NM_181471] | 5982   |
| A_23_P14193  | -5.5 | -2.4 | -2.3 | -2.4 | RFC3    | Homo sapiens replication factor C (activator 1) 3, 38kDa (RFC3), transcript variant 1, mRNA [NM_002915] | 5983   |

|              |      |      |      |      |      |                                                                                                           |      |
|--------------|------|------|------|------|------|-----------------------------------------------------------------------------------------------------------|------|
| A_32_P197016 | 3.1  | 3.1  | 6.7  | 1.9  | RFC3 | Homo sapiens replication factor C (activator 1) 3, 38kDa (RFC3), transcript variant 2, mRNA [NM_181558]   | 5983 |
| A_23_P18196  | -1.0 | -1.5 | -3.2 | -1.1 | RFC4 | Homo sapiens replication factor C (activator 1) 4, 37kDa (RFC4), transcript variant 1, mRNA [NM_002916]   | 5984 |
| A_23_P95302  | 6.4  | 6.4  | 4.3  | 6.8  | RFC5 | Homo sapiens replication factor C (activator 1) 5, 36.5kDa (RFC5), transcript variant 2, mRNA [NM_181578] | 5985 |

|              |      |      |      |       |       |                                                                                                    |        |
|--------------|------|------|------|-------|-------|----------------------------------------------------------------------------------------------------|--------|
| A_23_P251647 | 1.1  | 1.1  | -3.5 | -1.4  | RFESD | Homo sapiens Rieske (Fe-S) domain containing (RFESD), transcript variant 2, mRNA [NM_173362]       | 317671 |
| A_32_P218883 | 1.1  | 1.0  | -1.0 | -11.3 | RFK   | Homo sapiens riboflavin kinase (RFK), mRNA [NM_018339]                                             | 55312  |
| A_24_P138912 | -1.7 | -1.3 | -2.4 | 1.4   | RFNG  | Homo sapiens RFNG O-fucosylpeptide 3-beta-N-acetylglucosaminyltransferase (RFNG), mRNA [NM_002917] | 5986   |
| A_23_P254434 | 1.0  | 1.2  | -7.4 | -2.8  | RFPL2 | Homo sapiens ret finger protein-like 2 (RFPL2), transcript variant 1, mRNA [NM_006605]             | 10739  |

|              |     |      |       |      |           |                                                                                                |       |
|--------------|-----|------|-------|------|-----------|------------------------------------------------------------------------------------------------|-------|
| A_24_P169048 | 3.8 | 3.7  | 3.7   | 3.7  | RFPL3-AS1 | Homo sapiens RFPL3 antisense RNA 1 (non-protein coding) (RFPL3-AS1), antisense RNA [NR_001450] | 10737 |
| A_23_P155441 | 1.7 | -1.0 | -12.4 | -1.1 | RFT1      | Homo sapiens RFT1 homolog (S. cerevisiae) (RFT1), mRNA [NM_052859]                             | 91869 |
| A_24_P408715 | 1.9 | 1.3  | 2.0   | 1.0  | RFT1      | Homo sapiens RFT1 homolog (S. cerevisiae) (RFT1), mRNA [NM_052859]                             | 91869 |
| A_23_P315571 | 1.7 | 1.7  | 2.2   | 1.0  | RFTN1     | Homo sapiens raftlin, lipid raft linker 1 (RFTN1), mRNA [NM_015150]                            | 23180 |

|              |      |      |      |      |       |                                                                                                                         |        |
|--------------|------|------|------|------|-------|-------------------------------------------------------------------------------------------------------------------------|--------|
| A_23_P363878 | 1.0  | -1.1 | -1.3 | -2.6 | RFTN2 | Homo sapiens raftlin family member 2 (RFTN2), mRNA [NM_144629]                                                          | 130132 |
| A_24_P685241 | -2.5 | 1.0  | 1.0  | 1.1  | RFX3  | regulatory factor X, 3 (influences HLA class II expression) [Source:HGNC Symbol;Acc:9984] [ENST00000382004]             | 5991   |
| A_23_P9289   | 1.1  | -8.5 | -1.0 | 1.5  | RFX3  | Homo sapiens regulatory factor X, 3 (influences HLA class II expression) (RFX3), transcript variant 2, mRNA [NM_134428] | 5991   |
| A_23_P26107  | -1.0 | 1.4  | -1.8 | 3.2  | RFX7  | Homo sapiens regulatory factor X, 7 (RFX7), mRNA [NM_022841]                                                            | 64864  |

|              |      |       |      |      |         |                                                                                                                         |        |
|--------------|------|-------|------|------|---------|-------------------------------------------------------------------------------------------------------------------------|--------|
| A_23_P165180 | 2.5  | 1.8   | 1.1  | 3.0  | RFXANK  | Homo sapiens regulatory factor X-associated ankyrin-containing protein (RFXANK), transcript variant 1, mRNA [NM_003721] | 8625   |
| A_23_P400459 | -2.7 | 1.1   | 1.2  | 1.1  | RG9MTD3 | Homo sapiens RNA (guanine-9-) methyltransferase domain containing 3 (RG9MTD3), mRNA [NM_144964]                         | 158234 |
| A_24_P289954 | -1.4 | -14.9 | -1.6 | -1.5 | RGAG4   | Homo sapiens retrotransposon gag domain containing 4 (RGAG4), mRNA [NM_001024455]                                       | 340526 |

|              |      |      |      |      |      |                                                                                                                   |       |
|--------------|------|------|------|------|------|-------------------------------------------------------------------------------------------------------------------|-------|
| A_23_P93383  | -2.5 | 1.2  | -2.6 | -1.5 | RGL2 | Homo sapiens ral guanine nucleotide dissociation stimulator-like 2 (RGL2), transcript variant 1, mRNA [NM_004761] | 5863  |
| A_24_P253454 | 1.1  | -2.0 | 1.4  | -1.0 | RGMA | Homo sapiens RGM domain family, member A (RGMA), transcript variant 4, mRNA [NM_020211]                           | 56963 |
| A_23_P114423 | -5.5 | 1.1  | -1.0 | 1.1  | RGN  | Homo sapiens regucalcin (senescence marker protein-30) (RGN), transcript variant 2, mRNA [NM_152869]              | 9104  |

|              |      |     |      |       |       |                                                                                                                  |        |
|--------------|------|-----|------|-------|-------|------------------------------------------------------------------------------------------------------------------|--------|
| A_24_P177932 | -2.9 | 1.1 | 1.8  | 1.2   | RGNEF | Homo sapiens<br>190 kDa<br>guanine nucleotide exchange factor (RGNEF), transcript variant 2, mRNA [NM_001177693] | 64283  |
| A_23_P135015 | 1.1  | 1.0 | -1.0 | -23.6 | RGP1  | Homo sapiens<br>RGP1 retrograde golgi transport homolog (S. cerevisiae) (RGP1), mRNA [NM_001080496]              | 9827   |
| A_32_P108544 | 2.4  | 1.0 | -1.4 | -2.2  | RGPD2 | Homo sapiens<br>RANBP2-like and GRIP domain containing 2 (RGPD2), mRNA [NM_001078170]                            | 729857 |



|              |     |      |      |      |       |                                                                                                          |        |
|--------------|-----|------|------|------|-------|----------------------------------------------------------------------------------------------------------|--------|
| A_23_P218637 | 2.0 | 2.0  | 2.0  | 1.0  | RGPD5 | Homo sapiens RANBP2-like and GRIP domain containing 5 (RGPD5), transcript variant 1, mRNA [NM_005054]    | 84220  |
| A_23_P357985 | 1.0 | -1.0 | -1.0 | 2.0  | RGPD6 | Homo sapiens RANBP2-like and GRIP domain containing 6 (RGPD6), transcript variant 2, mRNA [NM_001037866] | 729540 |
| A_24_P289273 | 1.4 | 1.0  | 1.2  | -2.9 | RGR   | retinal G protein coupled receptor [Source:HGNC Symbol;Acc:9990] [ENST00000372092]                       | 5995   |

|              |      |      |       |      |       |                                                                                                  |      |
|--------------|------|------|-------|------|-------|--------------------------------------------------------------------------------------------------|------|
| A_24_P325118 | 2.2  | 2.7  | -22.9 | -2.7 | RGS11 | regulator of G-protein signaling 11 [Source:HGNC Symbol;Acc:9993] [ENST00000397768]              | 8786 |
| A_23_P118122 | 2.1  | 3.0  | 5.9   | 1.9  | RGS11 | Homo sapiens regulator of G-protein signaling 11 (RGS11), transcript variant 2, mRNA [NM_003834] | 8786 |
| A_23_P69513  | -1.3 | -3.3 | -3.1  | -1.1 | RGS12 | Homo sapiens regulator of G-protein signaling 12 (RGS12), transcript variant 1, mRNA [NM_198229] | 6002 |

|              |      |      |      |      |       |                                                                                                  |      |
|--------------|------|------|------|------|-------|--------------------------------------------------------------------------------------------------|------|
| A_23_P352435 | -1.0 | 1.7  | -1.1 | -2.9 | RGS12 | Homo sapiens regulator of G-protein signaling 12 (RGS12), transcript variant 2, mRNA [NM_002926] | 6002 |
| A_24_P33705  | -1.0 | 1.1  | 1.2  | -5.1 | RGS12 | Homo sapiens regulator of G-protein signaling 12 (RGS12), transcript variant 1, mRNA [NM_198229] | 6002 |
| A_24_P220786 | 1.1  | -1.6 | -3.6 | -1.3 | RGS12 | Homo sapiens regulator of G-protein signaling 12 (RGS12), transcript variant 1, mRNA [NM_198229] | 6002 |

|              |      |       |      |       |       |                                                                                                  |       |
|--------------|------|-------|------|-------|-------|--------------------------------------------------------------------------------------------------|-------|
| A_23_P61140  | 1.2  | 1.3   | -2.1 | -1.5  | RGS14 | Homo sapiens regulator of G-protein signaling 14 (RGS14), mRNA [NM_006480]                       | 10636 |
| A_23_P124927 | -4.2 | -16.6 | 1.5  | 1.1   | RGS14 | Homo sapiens regulator of G-protein signaling 14 (RGS14), mRNA [NM_006480]                       | 10636 |
| A_23_P156861 | 1.4  | 1.4   | 1.3  | -24.6 | RGS17 | Homo sapiens regulator of G-protein signaling 17 (RGS17), mRNA [NM_012419]                       | 26575 |
| A_23_P257014 | 4.1  | 4.1   | 2.2  | 3.1   | RGS19 | Homo sapiens regulator of G-protein signaling 19 (RGS19), transcript variant 1, mRNA [NM_005873] | 10287 |

|              |       |      |      |      |       |                                                                                                  |      |
|--------------|-------|------|------|------|-------|--------------------------------------------------------------------------------------------------|------|
| A_23_P73097  | -22.8 | 1.1  | -2.2 | 1.1  | RGS20 | Homo sapiens regulator of G-protein signaling 20 (RGS20), transcript variant 1, mRNA [NM_170587] | 8601 |
| A_23_P219197 | -8.7  | 1.1  | 1.4  | -1.4 | RGS3  | Homo sapiens regulator of G-protein signaling 3 (RGS3), transcript variant 4, mRNA [NM_134427]   | 5998 |
| A_23_P200737 | 1.1   | -2.5 | -1.3 | -1.1 | RGS4  | Homo sapiens regulator of G-protein signaling 4 (RGS4), transcript variant 2, mRNA [NM_005613]   | 5999 |

|              |      |      |      |     |        |                                                                                                |        |
|--------------|------|------|------|-----|--------|------------------------------------------------------------------------------------------------|--------|
| A_23_P51518  | 2.4  | 1.8  | 2.4  | 1.1 | RGS5   | Homo sapiens regulator of G-protein signaling 5 (RGS5), transcript variant 1, mRNA [NM_003617] | 8490   |
| A_23_P46045  | -1.3 | -2.4 | -2.0 | 1.0 | RGS5   | Homo sapiens regulator of G-protein signaling 5 (RGS5), transcript variant 1, mRNA [NM_003617] | 8490   |
| A_23_P205666 | 1.0  | -1.6 | 5.9  | 1.5 | RGS6   | Homo sapiens regulator of G-protein signaling 6 (RGS6), transcript variant 2, mRNA [NM_004296] | 9628   |
| A_23_P81233  | 3.3  | -1.3 | 3.2  | 3.5 | RGS7BP | Homo sapiens regulator of G-protein signaling 7 binding protein (RGS7BP), mRNA [NM_001029875]  | 401190 |

|              |      |      |      |      |        |                                                                                                |        |
|--------------|------|------|------|------|--------|------------------------------------------------------------------------------------------------|--------|
| A_23_P103424 | 10.5 | 3.0  | 4.4  | 5.7  | RGS8   | Homo sapiens regulator of G-protein signaling 8 (RGS8), transcript variant 1, mRNA [NM_033345] | 85397  |
| A_23_P66881  | -1.4 | -1.4 | -1.6 | -2.3 | RGS9   | Homo sapiens regulator of G-protein signaling 9 (RGS9), transcript variant 1, mRNA [NM_003835] | 8787   |
| A_32_P355943 | -1.1 | -1.0 | -2.5 | -1.0 | RGSL1  | Homo sapiens regulator of G-protein signaling like 1 (RGSL1), mRNA [NM_001137669]              | 353299 |
| A_23_P155009 | 1.0  | 2.1  | 1.3  | 1.3  | RHBDD3 | Homo sapiens rhomboid domain containing 3 (RHBDD3), mRNA [NM_012265]                           | 25807  |

|              |      |     |      |     |        |                                                                                                         |       |
|--------------|------|-----|------|-----|--------|---------------------------------------------------------------------------------------------------------|-------|
| A_23_P163682 | -1.0 | 2.1 | -5.3 | 1.4 | RHBDF1 | Homo sapiens rhomboid 5 homolog 1 (Drosophila) (RHBDF1), mRNA [NM_022450]                               | 64285 |
| A_32_P46571  | 1.9  | 1.9 | 2.6  | 1.2 | RHBDL2 | Homo sapiens rhomboid, veinlet-like 2 (Drosophila) (RHBDL2), mRNA [NM_017821]                           | 54933 |
| A_23_P51690  | 2.4  | 3.2 | 2.1  | 1.4 | RHBG   | Homo sapiens Rh family, B glycoprotein (gene/pseudogene) (RHBG), transcript variant 1, mRNA [NM_020407] | 57127 |



|              |      |      |      |     |      |                                                                                                      |       |
|--------------|------|------|------|-----|------|------------------------------------------------------------------------------------------------------|-------|
| A_23_P62634  | 2.8  | 2.8  | 1.6  | 2.8 | RHCE | Homo sapiens Rh blood group, CcEe antigens (RHCE), transcript variant 1, mRNA [NM_020485]            | 6006  |
| A_23_P151975 | 2.1  | -1.1 | 3.1  | 1.0 | RHCG | Homo sapiens Rh family, C glycoprotein (RHCG), mRNA [NM_016321]                                      | 51458 |
| A_24_P135856 | 1.0  | 1.0  | -2.1 | 1.1 | RHD  | Homo sapiens Rh blood group, D antigen (RHD), transcript variant 1, mRNA [NM_016124]                 | 6007  |
| A_32_P124746 | -1.1 | 1.1  | -4.1 | 1.0 | RHEB | Homo sapiens Ras homolog enriched in brain, mRNA (cDNA clone IMAGE:3892637), partial cds. [BC009638] | 6009  |

|              |      |      |      |      |        |                                                                              |        |
|--------------|------|------|------|------|--------|------------------------------------------------------------------------------|--------|
| A_23_P134247 | -2.3 | -1.2 | -1.0 | -1.4 | RHEB   | Homo sapiens Ras homolog enriched in brain (RHEB), mRNA [NM_005614]          | 6009   |
| A_23_P2307   | 3.6  | -1.4 | 3.1  | 3.8  | RHEBL1 | Homo sapiens Ras homolog enriched in brain like 1 (RHEBL1), mRNA [NM_144593] | 121268 |
| A_24_P26181  | -1.8 | -3.2 | -8.9 | -2.5 | RHO    | Homo sapiens rhodopsin (RHO), mRNA [NM_000539]                               | 6010   |
| A_23_P407472 | -3.1 | 1.0  | -1.1 | -1.6 | RHO    | Homo sapiens rhodopsin (RHO), mRNA [NM_000539]                               | 6010   |
| A_24_P174550 | 2.7  | 1.7  | -2.0 | 1.2  | RHOA   | Homo sapiens ras homolog gene family, member A (RHOA), mRNA [NM_001664]      | 387    |

|              |     |     |      |      |      |                                                                                        |       |
|--------------|-----|-----|------|------|------|----------------------------------------------------------------------------------------|-------|
| A_23_P51136  | 1.3 | 2.8 | 1.7  | -1.2 | RHOB | Homo sapiens ras homolog gene family, member B (RHOB), mRNA [NM_004040]                | 388   |
| A_23_P1523   | 1.7 | 2.2 | -2.6 | 1.7  | RHOD | Homo sapiens ras homolog gene family, member D (RHOD), mRNA [NM_014578]                | 29984 |
| A_24_P104115 | 1.0 | 1.7 | -2.7 | -1.7 | RHOF | Homo sapiens ras homolog gene family, member F (in filopodia) (RHOF), mRNA [NM_019034] | 54509 |
| A_24_P104119 | 1.6 | 1.6 | 2.7  | 1.6  | RHOF | Homo sapiens ras homolog gene family, member F (in filopodia) (RHOF), mRNA [NM_019034] | 54509 |

|              |      |      |      |      |        |                                                                         |        |
|--------------|------|------|------|------|--------|-------------------------------------------------------------------------|--------|
| A_32_P83915  | -1.0 | -1.0 | -2.1 | -1.0 | RHOQ   | Homo sapiens ras homolog gene family, member Q (RHOQ), mRNA [NM_012249] | 23433  |
| A_23_P117912 | -2.0 | -1.3 | -1.5 | -1.3 | RHOV   | Homo sapiens ras homolog gene family, member V (RHOV), mRNA [NM_133639] | 171177 |
| A_23_P85082  | -5.4 | -1.2 | -1.3 | -1.6 | RHOXF1 | Homo sapiens RhoX homeobox family, member 1 (RHOXF1), mRNA [NM_139282]  | 158800 |
| A_23_P352494 | -1.2 | -1.2 | -3.0 | -1.2 | RHOXF2 | Homo sapiens RhoX homeobox family, member 2 (RHOXF2), mRNA [NM_032498]  | 84528  |

|             |      |      |      |      |       |                                                                                                   |        |
|-------------|------|------|------|------|-------|---------------------------------------------------------------------------------------------------|--------|
| A_23_P87435 | 2.4  | 2.1  | 2.0  | 2.7  | RHPN1 | Homo sapiens rhophilin, Rho GTPase binding protein 1 (RHPN1), mRNA [NM_052924]                    | 114822 |
| A_23_P87432 | -1.2 | -1.6 | 1.3  | -3.5 | RHPN1 | Homo sapiens rhophilin, Rho GTPase binding protein 1 (RHPN1), mRNA [NM_052924]                    | 114822 |
| A_23_P73667 | 2.7  | 2.1  | -1.2 | -1.3 | RIBC1 | Homo sapiens RIB43A domain with coiled-coils 1 (RIBC1), transcript variant 1, mRNA [NM_001031745] | 158787 |

|              |      |      |      |      |       |                                                                                                            |       |
|--------------|------|------|------|------|-------|------------------------------------------------------------------------------------------------------------|-------|
| A_24_P115971 | -8.6 | -2.4 | -8.8 | -1.8 | RIC8A | Homo sapiens resistance to inhibitors of cholinesterase 8 homolog A (C. elegans) (RIC8A), mRNA [NM_021932] | 60626 |
| A_23_P64489  | 1.2  | 1.4  | 2.9  | 2.4  | RIC8A | Homo sapiens resistance to inhibitors of cholinesterase 8 homolog A (C. elegans) (RIC8A), mRNA [NM_021932] | 60626 |
| A_23_P64932  | 2.1  | 2.1  | -1.3 | 2.0  | RIC8B | Homo sapiens resistance to inhibitors of cholinesterase 8 homolog B (C. elegans) (RIC8B), mRNA [NM_018157] | 55188 |

|              |      |       |      |      |        |                                                                                                                   |        |
|--------------|------|-------|------|------|--------|-------------------------------------------------------------------------------------------------------------------|--------|
| A_24_P244644 | 1.1  | -30.5 | -1.3 | 1.0  | RIC8B  | Homo sapiens resistance to inhibitors of cholinesterase 8 homolog B (C. elegans) (RIC8B), mRNA [NM_018157]        | 55188  |
| A_24_P34476  | -1.2 | 1.3   | -4.3 | -1.1 | RIF1   | Homo sapiens RAP1 interacting factor homolog (yeast) (RIF1), transcript variant 1, mRNA [NM_018151]               | 55183  |
| A_32_P212471 | 1.5  | 1.0   | 2.1  | 1.1  | RIIAD1 | Homo sapiens regulatory subunit of type II PKA R-subunit (RIIa) domain containing 1 (RIIAD1), mRNA [NM_001144956] | 284485 |

|              |      |      |      |      |        |                                                                                                  |       |
|--------------|------|------|------|------|--------|--------------------------------------------------------------------------------------------------|-------|
| A_32_P334325 | -1.0 | -2.7 | 1.1  | -1.3 | RIMBP2 | Homo sapiens RIMS binding protein 2 (RIMBP2), mRNA [NM_015347]                                   | 23504 |
| A_24_P162226 | 1.2  | 1.2  | -1.8 | -4.6 | RIMBP2 | Homo sapiens RIMS binding protein 2 (RIMBP2), mRNA [NM_015347]                                   | 23504 |
| A_24_P67784  | -2.7 | 1.0  | 1.1  | 1.1  | RIMBP3 | Homo sapiens RIMS binding protein 3 (RIMBP3), mRNA [NM_015672]                                   | 85376 |
| A_24_P7157   | 4.4  | 4.3  | 4.4  | 4.6  | RIMKLB | Homo sapiens ribosomal modification protein rimK-like family member B (RIMKLB), mRNA [NM_020734] | 57494 |



|              |      |      |      |      |        |                                                                                                        |        |
|--------------|------|------|------|------|--------|--------------------------------------------------------------------------------------------------------|--------|
| A_23_P361841 | 1.0  | 1.2  | -2.6 | -1.1 | RIMKLB | Homo sapiens ribosomal modification on protein rimK-like family member B (RIMKLB), mRNA [NM_020734]    | 57494  |
| A_23_P147786 | 1.3  | -2.1 | -1.4 | 1.4  | RIMS2  | Homo sapiens regulating synaptic membrane exocytosis 2 (RIMS2), transcript variant 2, mRNA [NM_014677] | 9699   |
| A_24_P374532 | -1.0 | 1.7  | 2.0  | -1.0 | RIMS4  | Homo sapiens regulating synaptic membrane exocytosis 4 (RIMS4), transcript variant 2, mRNA [NM_182970] | 140730 |

|              |      |      |      |      |       |                                                                                                        |        |
|--------------|------|------|------|------|-------|--------------------------------------------------------------------------------------------------------|--------|
| A_32_P38645  | -3.2 | -1.6 | -1.6 | -1.6 | RIMS4 | Homo sapiens regulating synaptic membrane exocytosis 4 (RIMS4), transcript variant 2, mRNA [NM_182970] | 140730 |
| A_23_P120572 | -2.8 | 1.3  | 2.1  | -1.4 | RIN2  | Homo sapiens Ras and Rab interactor 2 (RIN2), transcript variant 2, mRNA [NM_018993]                   | 54453  |
| A_23_P163200 | -1.0 | 1.7  | -1.1 | -2.4 | RIN3  | Homo sapiens cDNA FLJ11700 fis, clone HEMBA1005050. [AK021762]                                         | 79890  |
| A_24_P200694 | 1.8  | 1.6  | 1.2  | -2.2 | RING1 | Homo sapiens ring finger protein 1 (RING1), mRNA [NM_002931]                                           | 6015   |

|              |      |      |     |      |       |                                                                                                |       |
|--------------|------|------|-----|------|-------|------------------------------------------------------------------------------------------------|-------|
| A_23_P55578  | 2.3  | 2.3  | 2.1 | 2.1  | RIOK3 | Homo sapiens RIO kinase 3 (yeast) (RIOK3), mRNA [NM_003831]                                    | 8780  |
| A_23_P370005 | -1.1 | -1.1 | 3.6 | -1.2 | RIPK1 | Homo sapiens receptor (TNFRSF)-interacting serine-threonine kinase 1 (RIPK1), mRNA [NM_003804] | 8737  |
| A_23_P252106 | 1.8  | 2.1  | 2.4 | 1.1  | RIPK2 | Homo sapiens receptor-interacting serine-threonine kinase 2 (RIPK2), mRNA [NM_003821]          | 8767  |
| A_23_P211267 | 3.7  | 7.3  | 6.9 | 1.4  | RIPK4 | Homo sapiens receptor-interacting serine-threonine kinase 4 (RIPK4), mRNA [NM_020639]          | 54101 |

|              |     |      |      |      |         |                                                                                            |        |
|--------------|-----|------|------|------|---------|--------------------------------------------------------------------------------------------|--------|
| A_32_P199901 | 1.3 | 1.5  | 1.2  | -3.2 | RIPPLY1 | Homo sapiens ripply1 homolog (zebrafish) (RIPPLY1), transcript variant 1, mRNA [NM_138382] | 92129  |
| A_23_P316601 | 1.0 | -1.0 | 2.1  | -1.0 | RIT1    | Homo sapiens Ras-like without CAAX 1 (RIT1), mRNA [NM_006912]                              | 6016   |
| A_23_P163361 | 1.2 | -1.0 | -1.1 | -5.6 | RLBP1   | Homo sapiens retinaldehyde binding protein 1 (RLBP1), mRNA [NM_000326]                     | 6017   |
| A_23_P39008  | 1.2 | 1.8  | 1.6  | -2.1 | RLN3    | Homo sapiens relaxin 3 (RLN3), mRNA [NM_080864]                                            | 117579 |
| A_24_P374863 | 2.1 | 2.8  | 2.1  | 1.3  | RLTPR   | Homo sapiens mRNA for FLJ00330 protein. [AK090421]                                         | 146206 |

|              |      |     |     |      |        |                                                                                                           |        |
|--------------|------|-----|-----|------|--------|-----------------------------------------------------------------------------------------------------------|--------|
| A_23_P353717 | -9.8 | 1.1 | 1.3 | -2.5 | RMI2   | Homo sapiens RMI2, RecQ mediated genome instability 2, homolog (S. cerevisiae) (RMI2), mRNA [NM_152308]   | 116028 |
| A_24_P114339 | 4.7  | 7.0 | 4.6 | 6.6  | RMND5A | Homo sapiens required for meiotic nuclear division 5 homolog A (S. cerevisiae) (RMND5A), mRNA [NM_022780] | 64795  |
| A_23_P401580 | 2.6  | 2.3 | 1.6 | 1.5  | RMND5B | Homo sapiens required for meiotic nuclear division 5 homolog B (S. cerevisiae) (RMND5B), mRNA [NM_022762] | 64777  |

|              |      |      |      |      |        |                                                                                                                     |       |
|--------------|------|------|------|------|--------|---------------------------------------------------------------------------------------------------------------------|-------|
| A_23_P257372 | 1.0  | -1.0 | -5.1 | 1.0  | RMND5B | required for meiotic nuclear division 5 homolog B (S. cerevisiae) [Source:H GNC Symbol;Acc:26181] [ENST00000507575] | 64777 |
| A_23_P48596  | -5.0 | -9.4 | -2.6 | -5.6 | RNASE1 | Homo sapiens ribonuclease, RNase A family, 1 (pancreatic) (RNASE1), transcript variant 3, mRNA [NM_198232]          | 6035  |
| A_24_P403959 | -1.7 | -1.1 | -2.2 | -1.7 | RNASE1 | Homo sapiens ribonuclease, RNase A family, 1 (pancreatic) (RNASE1), transcript variant 3, mRNA [NM_198232]          | 6035  |

|              |     |      |      |     |        |                                                                                                                |      |
|--------------|-----|------|------|-----|--------|----------------------------------------------------------------------------------------------------------------|------|
| A_32_P1712   | 1.1 | -1.6 | -2.1 | 1.0 | RNASE2 | Homo sapiens ribonuclease, RNase A family, 2 (liver, eosinophil-derived neurotoxin) (RNASE2), mRNA [NM_002934] | 6036 |
| A_23_P151637 | 1.6 | -1.5 | -2.5 | 1.4 | RNASE2 | Homo sapiens ribonuclease, RNase A family, 2 (liver, eosinophil-derived neurotoxin) (RNASE2), mRNA [NM_002934] | 6036 |
| A_23_P163025 | 3.2 | 3.1  | 2.8  | 2.1 | RNASE3 | Homo sapiens ribonuclease, RNase A family, 3 (RNASE3), mRNA [NM_002935]                                        | 6037 |

|              |       |      |      |      |          |                                                                                               |        |
|--------------|-------|------|------|------|----------|-----------------------------------------------------------------------------------------------|--------|
| A_23_P205531 | -1.1  | -1.1 | -2.2 | -1.3 | RNASE4   | Homo sapiens ribonuclease, RNase A family, 4 (RNASE4), transcript variant 2, mRNA [NM_002937] | 6038   |
| A_23_P106080 | -12.3 | -2.2 | -1.1 | 1.1  | RNASE7   | Homo sapiens ribonuclease, RNase A family, 7 (RNASE7), mRNA [NM_032572]                       | 84659  |
| A_23_P27167  | 1.7   | 1.4  | -1.1 | 2.0  | RNASEH1  | Homo sapiens ribonuclease H1 (RNASEH1), mRNA [NM_002936]                                      | 246243 |
| A_23_P164826 | 3.1   | 1.1  | -1.2 | -1.1 | RNASEH2A | Homo sapiens ribonuclease H2, subunit A (RNASEH2A), mRNA [NM_006397]                          | 10535  |



|              |      |      |      |      |          |                                                                                            |       |
|--------------|------|------|------|------|----------|--------------------------------------------------------------------------------------------|-------|
| A_23_P140088 | 1.1  | 1.0  | -2.6 | -1.0 | RNASEH2B | Homo sapiens ribonuclease H2, subunit B (RNASEH2B), transcript variant 1, mRNA [NM_024570] | 79621 |
| A_23_P434807 | -1.2 | -1.3 | 4.1  | 4.5  | RND2     | Homo sapiens Rho family GTPase 2 (RND2), mRNA [NM_005440]                                  | 8153  |
| A_23_P56709  | 1.4  | 2.7  | 3.2  | 1.5  | RNF103   | Homo sapiens ring finger protein 103 (RNF103), transcript variant 1, mRNA [NM_005667]      | 7844  |
| A_23_P107116 | -1.1 | -2.3 | -1.2 | -1.2 | RNF112   | Homo sapiens ring finger protein 112 (RNF112), mRNA [NM_007148]                            | 7732  |

|              |      |      |      |      |         |                                                                                       |       |
|--------------|------|------|------|------|---------|---------------------------------------------------------------------------------------|-------|
| A_23_P258071 | 2.5  | 1.3  | 1.9  | 1.6  | RNF113A | Homo sapiens ring finger protein 113A (RNF113A), mRNA [NM_006978]                     | 7737  |
| A_24_P560909 | -8.5 | 1.0  | 1.0  | 1.1  | RNF115  | ring finger protein 115 [Source:HGNC Symbol;Acc:18154] [ENST00000369291]              | 27246 |
| A_23_P75973  | -7.5 | -2.0 | -5.9 | -1.4 | RNF121  | Homo sapiens ring finger protein 121 (RNF121), transcript variant 1, mRNA [NM_018320] | 55298 |
| A_23_P250054 | 1.8  | 1.6  | 1.1  | 2.2  | RNF123  | Homo sapiens ring finger protein 123 (RNF123), mRNA [NM_022064]                       | 63891 |
| A_23_P101141 | -1.0 | -1.1 | -2.9 | -1.1 | RNF125  | Homo sapiens ring finger protein 125 (RNF125), mRNA [NM_017831]                       | 54941 |

|              |      |      |      |      |        |                                                                                       |        |
|--------------|------|------|------|------|--------|---------------------------------------------------------------------------------------|--------|
| A_23_P314086 | 2.3  | -1.5 | -1.2 | -2.5 | RNF126 | Homo sapiens ring finger protein 126 (RNF126), mRNA [NM_194460]                       | 55658  |
| A_23_P42963  | -4.9 | 1.1  | -1.0 | -1.2 | RNF133 | Homo sapiens ring finger protein 133 (RNF133), mRNA [NM_139175]                       | 168433 |
| A_23_P252283 | 3.6  | 3.5  | 1.5  | 1.6  | RNF135 | Homo sapiens ring finger protein 135 (RNF135), transcript variant 1, mRNA [NM_032322] | 84282  |
| A_24_P202512 | -4.5 | -2.7 | -1.9 | -1.8 | RNF138 | Homo sapiens ring finger protein 138 (RNF138), transcript variant 1, mRNA [NM_016271] | 51444  |

|              |      |      |      |      |        |                                                                                       |       |
|--------------|------|------|------|------|--------|---------------------------------------------------------------------------------------|-------|
| A_23_P89755  | 1.0  | 2.6  | -1.1 | -1.1 | RNF138 | Homo sapiens ring finger protein 138 (RNF138), transcript variant 1, mRNA [NM_016271] | 51444 |
| A_24_P69150  | -9.5 | 1.0  | 1.0  | 1.1  | RNF14  | Homo sapiens ring finger protein 14 (RNF14), transcript variant 1, mRNA [NM_004290]   | 9604  |
| A_24_P132039 | 1.9  | 1.8  | 2.2  | -2.5 | RNF14  | Homo sapiens ring finger protein 14 (RNF14), transcript variant 1, mRNA [NM_004290]   | 9604  |
| A_24_P372625 | -1.9 | -1.9 | -3.7 | -1.9 | RNF141 | Homo sapiens ring finger protein 141 (RNF141), mRNA [NM_016422]                       | 50862 |

|              |      |      |      |       |         |                                                                                       |        |
|--------------|------|------|------|-------|---------|---------------------------------------------------------------------------------------|--------|
| A_24_P37264  | -4.7 | 1.1  | -1.0 | -1.0  | RNF144A | Homo sapiens ring finger protein 144A (RNF144A), mRNA [NM_014746]                     | 9781   |
| A_23_P167559 | -2.3 | -1.5 | -3.4 | -10.6 | RNF145  | Homo sapiens ring finger protein 145 (RNF145), transcript variant 2, mRNA [NM_144726] | 153830 |
| A_24_P170234 | 1.1  | 1.1  | -3.9 | 1.0   | RNF148  | Homo sapiens ring finger protein 148 (RNF148), mRNA [NM_198085]                       | 378925 |
| A_32_P4199   | -1.2 | -1.2 | -7.7 | -1.2  | RNF152  | Homo sapiens ring finger protein 152 (RNF152), mRNA [NM_173557]                       | 220441 |
| A_32_P57810  | -1.0 | 1.6  | -1.1 | -2.1  | RNF157  | Homo sapiens ring finger protein 157 (RNF157), mRNA [NM_052916]                       | 114804 |

|              |      |       |      |      |        |                                                                                       |        |
|--------------|------|-------|------|------|--------|---------------------------------------------------------------------------------------|--------|
| A_23_P416242 | 1.2  | -2.3  | -2.2 | 1.2  | RNF166 | Homo sapiens ring finger protein 166 (RNF166), transcript variant 1, mRNA [NM_178841] | 115992 |
| A_32_P195291 | -1.5 | -19.2 | -1.4 | -1.5 | RNF168 | Homo sapiens ring finger protein 168 (RNF168), mRNA [NM_152617]                       | 165918 |
| A_24_P99066  | 2.0  | 2.3   | 1.2  | 2.1  | RNF17  | Homo sapiens ring finger protein 17 (RNF17), transcript variant 1, mRNA [NM_031277]   | 56163  |
| A_23_P99373  | -1.0 | 2.4   | 1.0  | -1.0 | RNF17  | Homo sapiens ring finger protein 17 (RNF17), transcript variant 1, mRNA [NM_031277]   | 56163  |

|              |      |     |      |      |        |                                                                                       |        |
|--------------|------|-----|------|------|--------|---------------------------------------------------------------------------------------|--------|
| A_23_P146209 | 3.6  | 2.1 | 1.6  | 1.9  | RNF170 | Homo sapiens ring finger protein 170 (RNF170), transcript variant 2, mRNA [NM_030954] | 81790  |
| A_23_P340263 | 1.1  | 1.0 | 1.0  | -3.1 | RNF175 | Homo sapiens ring finger protein 175 (RNF175), mRNA [NM_173662]                       | 285533 |
| A_23_P103062 | -1.0 | 1.2 | 1.0  | -3.9 | RNF185 | Homo sapiens ring finger protein 185 (RNF185), transcript variant 1, mRNA [NM_152267] | 91445  |
| A_32_P15421  | -1.3 | 1.4 | -1.8 | -4.4 | RNF185 | Homo sapiens ring finger protein 185 (RNF185), transcript variant 1, mRNA [NM_152267] | 91445  |

|              |      |      |      |      |        |                                                                                       |        |
|--------------|------|------|------|------|--------|---------------------------------------------------------------------------------------|--------|
| A_24_P411899 | -1.1 | 2.4  | 1.5  | -1.2 | RNF19A | Homo sapiens ring finger protein 19A (RNF19A), transcript variant 1, mRNA [NM_183419] | 25897  |
| A_23_P215897 | 1.7  | 2.9  | 1.7  | 1.0  | RNF19A | Homo sapiens ring finger protein 19A (RNF19A), transcript variant 1, mRNA [NM_183419] | 25897  |
| A_23_P336000 | -8.6 | -1.1 | -2.5 | -2.5 | RNF207 | Homo sapiens ring finger protein 207 (RNF207), mRNA [NM_207396]                       | 388591 |
| A_23_P42724  | -1.0 | -2.9 | -1.2 | -1.1 | RNF216 | Homo sapiens ring finger protein 216 (RNF216), transcript variant 1, mRNA [NM_207111] | 54476  |



|              |      |     |      |      |          |                                                                                                                |        |
|--------------|------|-----|------|------|----------|----------------------------------------------------------------------------------------------------------------|--------|
| A_24_P235131 | -2.8 | 1.7 | 1.3  | 1.0  | RNF216   | Homo sapiens ring finger protein 216 (RNF216), transcript variant 1, mRNA [NM_207111]                          | 54476  |
| A_24_P469641 | -1.5 | 1.0 | -2.4 | -2.4 | RNF216   | Homo sapiens ring finger protein 216 (RNF216), transcript variant 1, mRNA [NM_207111]                          | 54476  |
| A_24_P643041 | 4.9  | 4.9 | 5.1  | 4.8  | RNF216P1 | Homo sapiens ring finger protein 216 pseudogene 1 (RNF216P1), transcript variant 3, non-coding RNA [NR_023385] | 441191 |
| A_24_P333019 | 2.6  | 2.0 | -1.1 | -1.5 | RNF24    | Homo sapiens ring finger protein 24 (RNF24), transcript variant 1, mRNA [NM_007219]                            | 11237  |

|              |      |      |      |      |       |                                                                                     |        |
|--------------|------|------|------|------|-------|-------------------------------------------------------------------------------------|--------|
| A_23_P39656  | -3.4 | 1.1  | 1.7  | -1.1 | RNF25 | Homo sapiens ring finger protein 25 (RNF25), mRNA [NM_022453]                       | 64320  |
| A_23_P64630  | -2.5 | -1.3 | -3.3 | -2.2 | RNF26 | Homo sapiens ring finger protein 26 (RNF26), mRNA [NM_032015]                       | 79102  |
| A_23_P19816  | -1.9 | -1.0 | -1.1 | -3.5 | RNF32 | Homo sapiens ring finger protein 32 (RNF32), transcript variant 3, mRNA [NM_030936] | 140545 |
| A_24_P4334   | 2.4  | 2.3  | -1.1 | -1.1 | RNF38 | Homo sapiens ring finger protein 38 (RNF38), transcript variant 2, mRNA [NM_194328] | 152006 |
| A_23_P255851 | 2.0  | 1.0  | -2.1 | -1.0 | RNF38 | Homo sapiens ring finger protein 38 (RNF38), transcript variant 2, mRNA [NM_194328] | 152006 |

|              |      |      |      |      |       |                                                                                                   |       |
|--------------|------|------|------|------|-------|---------------------------------------------------------------------------------------------------|-------|
| A_23_P167308 | 1.2  | 1.2  | -3.1 | -1.0 | RNF4  | Homo sapiens ring finger protein 4 (RNF4), transcript variant 2, mRNA [NM_002938]                 | 6047  |
| A_24_P630875 | -6.3 | -1.3 | -1.3 | -1.2 | RNF41 | Homo sapiens ring finger protein 41 (RNF41), transcript variant 2, mRNA [NM_194358]               | 10193 |
| A_24_P330886 | 3.5  | 1.5  | 1.9  | 3.0  | RNFT1 | Homo sapiens ring finger protein, transmembrane 1 (RNFT1), mRNA [NM_016125]                       | 51136 |
| A_24_P13390  | 1.2  | 3.5  | 1.5  | 1.5  | RNFT2 | Homo sapiens ring finger protein, transmembrane 2 (RNFT2), transcript variant 2, mRNA [NM_032814] | 84900 |

|              |      |      |      |      |      |                                                                                                                                             |       |
|--------------|------|------|------|------|------|---------------------------------------------------------------------------------------------------------------------------------------------|-------|
| A_23_P349203 | -1.9 | -2.0 | -2.1 | -2.5 | RNH1 | ribonuclea<br>se/angiog<br>enin<br>inhibitor 1<br>[Source:H<br>GNC<br>Symbol;Ac<br>c:10074]<br>[ENST0000<br>0533592]                        | 6050  |
| A_24_P415601 | -1.3 | -3.6 | -1.5 | -2.4 | RNH1 | Homo<br>sapiens<br>ribonuclea<br>se/angiog<br>enin<br>inhibitor 1<br>(RNH1),<br>transcript<br>variant 1,<br>mRNA<br>[NM_0029<br>39]         | 6050  |
| A_23_P202672 | 1.1  | -5.1 | 1.0  | 1.0  | RNH1 | Homo<br>sapiens<br>ribonuclea<br>se/angiog<br>enin<br>inhibitor 1<br>(RNH1),<br>transcript<br>variant 1,<br>mRNA<br>[NM_0029<br>39]         | 6050  |
| A_23_P202501 | 1.0  | -6.1 | -1.0 | -1.1 | RNLS | Homo<br>sapiens<br>renalase,<br>FAD-<br>dependen<br>t amine<br>oxidase<br>(RNLS),<br>transcript<br>variant 1,<br>mRNA<br>[NM_0010<br>31709] | 55328 |

|              |      |      |      |      |       |                                                                                              |       |
|--------------|------|------|------|------|-------|----------------------------------------------------------------------------------------------|-------|
| A_24_P48408  | -3.4 | 1.6  | -1.3 | 1.0  | RNMT  | Homo sapiens RNA (guanine-7-) methyltransferase (RNMT), mRNA [NM_003799]                     | 8731  |
| A_24_P344890 | 1.1  | 2.2  | 2.1  | 2.4  | RNPC3 | RNA-binding region (RNP1, RRM) containing 3 [Source:HGNC Symbol;Acc:18666] [ENST00000533099] | 55599 |
| A_23_P254967 | -3.4 | -1.0 | -1.0 | -1.1 | RNPC3 | RNA-binding region (RNP1, RRM) containing 3 [Source:HGNC Symbol;Acc:18666] [ENST00000533099] | 55599 |

|              |      |      |      |     |         |                                                                                              |       |
|--------------|------|------|------|-----|---------|----------------------------------------------------------------------------------------------|-------|
| A_23_P254970 | 1.9  | 2.3  | 1.6  | 1.6 | RNPC3   | RNA-binding region (RNP1, RRM) containing 3 [Source:HGNC Symbol;Acc:18666] [ENST00000533099] | 55599 |
| A_24_P68649  | 1.9  | -2.3 | -1.6 | 1.5 | RNPEP   | Homo sapiens arginyl aminopeptidase (aminopeptidase B) (RNPEP), mRNA [NM_020216]             | 6051  |
| A_23_P17030  | -1.9 | -4.5 | -1.5 | 1.8 | RNPEPL1 | Homo sapiens arginyl aminopeptidase (aminopeptidase B)-like 1 (RNPEPL1), mRNA [NM_018226]    | 57140 |

|              |      |      |      |      |       |                                                                                                                          |       |
|--------------|------|------|------|------|-------|--------------------------------------------------------------------------------------------------------------------------|-------|
| A_24_P725630 | -1.1 | -2.3 | 1.1  | 1.0  | RNPS1 | Homo sapiens RNA binding protein S1, serine-rich domain (RNPS1), transcript variant 1, mRNA [NM_006711]                  | 10921 |
| A_23_P80503  | -3.8 | 1.0  | -1.4 | 1.0  | ROBO1 | Homo sapiens roundabout, axon guidance receptor, homolog 1 (Drosophila) (ROBO1), transcript variant 2, mRNA [NM_133631]  | 6091  |
| A_24_P376150 | -1.1 | -1.0 | -1.1 | -2.4 | ROBO2 | Homo sapiens cDNA FLJ90299 fis, clone NT2RP2000514, highly similar to Homo sapiens roundabout 2 (robo2) mRNA. [AK074780] | 6092  |

|              |      |      |      |      |       |                                                                                                                         |       |
|--------------|------|------|------|------|-------|-------------------------------------------------------------------------------------------------------------------------|-------|
| A_24_P16326  | -1.2 | -2.2 | -1.3 | -3.0 | ROBO2 | Homo sapiens roundabout, axon guidance receptor, homolog 2 (Drosophila) (ROBO2), transcript variant 2, mRNA [NM_002942] | 6092  |
| A_23_P87082  | 3.5  | 4.7  | 1.2  | 1.3  | ROBO3 | Homo sapiens roundabout, axon guidance receptor, homolog 3 (Drosophila) (ROBO3), mRNA [NM_022370]                       | 64221 |
| A_23_P344421 | 1.3  | -1.2 | -2.1 | -1.1 | ROBO4 | Homo sapiens roundabout homolog 4, magic roundabout (Drosophila) (ROBO4), mRNA [NM_019055]                              | 54538 |



|              |      |      |      |      |         |                                                                                                                         |        |
|--------------|------|------|------|------|---------|-------------------------------------------------------------------------------------------------------------------------|--------|
| A_24_P538403 | -3.1 | 1.0  | 1.1  | 1.1  | ROCK1   | Homo sapiens Rho-associated, coiled-coil containing protein kinase 1 (ROCK1), mRNA [NM_005406]                          | 6093   |
| A_23_P130429 | 2.3  | 2.0  | -1.1 | 1.1  | ROCK1   | Homo sapiens Rho-associated, coiled-coil containing protein kinase 1 (ROCK1), mRNA [NM_005406]                          | 6093   |
| A_32_P203320 | -1.0 | -1.1 | -1.2 | -2.0 | ROCK1P1 | Homo sapiens Rho-associated, coiled-coil containing protein kinase 1 pseudogene 1 (ROCK1P1), non-coding RNA [NR_033770] | 727758 |

|              |      |       |      |      |        |                                                                                                |        |
|--------------|------|-------|------|------|--------|------------------------------------------------------------------------------------------------|--------|
| A_24_P328333 | -1.0 | -1.1  | -6.7 | -7.0 | ROCK2  | Homo sapiens Rho-associated, coiled-coil containing protein kinase 2 (ROCK2), mRNA [NM_004850] | 9475   |
| A_23_P100499 | 1.3  | -1.6  | -1.2 | -2.6 | ROGDI  | Homo sapiens rogdi homolog (Drosophila) (ROGDI), mRNA [NM_024589]                              | 79641  |
| A_32_P184464 | -1.0 | -69.5 | -1.1 | -1.1 | ROPN1  | Homo sapiens rhopilin associated tail protein 1 (ROPN1), mRNA [NM_017578]                      | 54763  |
| A_24_P417407 | -1.2 | 3.8   | 1.2  | 1.9  | ROPN1B | Homo sapiens rhopilin associated tail protein 1B (ROPN1B), mRNA [NM_001012337]                 | 152015 |

|              |      |      |      |     |      |                                                                                                                |      |
|--------------|------|------|------|-----|------|----------------------------------------------------------------------------------------------------------------|------|
| A_24_P410605 | 2.1  | 2.0  | 1.4  | 1.6 | ROR1 | Homo sapiens receptor tyrosine kinase-like orphan receptor 1 (ROR1), transcript variant 2, mRNA [NM_001083592] | 4919 |
| A_23_P158318 | -2.1 | 1.3  | 2.1  | 1.6 | ROR2 | Homo sapiens receptor tyrosine kinase-like orphan receptor 2 (ROR2), mRNA [NM_004560]                          | 4920 |
| A_23_P26124  | 2.2  | 2.1  | 2.1  | 2.2 | RORA | Homo sapiens RAR-related orphan receptor A (RORA), transcript variant 2, mRNA [NM_134260]                      | 6095 |
| A_23_P71699  | 1.7  | -5.0 | -1.2 | 1.8 | RORB | Homo sapiens RAR-related orphan receptor B (RORB), mRNA [NM_006914]                                            | 6096 |

|              |      |      |      |      |      |                                                                                           |      |
|--------------|------|------|------|------|------|-------------------------------------------------------------------------------------------|------|
| A_23_P372910 | 2.9  | 5.1  | 1.1  | 3.5  | RORC | Homo sapiens RAR-related orphan receptor C (RORC), transcript variant 1, mRNA [NM_005060] | 6097 |
| A_23_P70278  | 1.5  | 1.4  | 1.4  | -5.0 | ROS1 | Homo sapiens c-ros oncogene 1, receptor tyrosine kinase (ROS1), mRNA [NM_002944]          | 6098 |
| A_23_P71368  | -1.1 | -4.3 | -2.7 | -1.1 | RP1  | Homo sapiens retinitis pigmentosa 1 (autosomal dominant) (RP1), mRNA [NM_006269]          | 6101 |
| A_24_P134568 | 1.1  | 1.4  | -2.7 | 1.1  | RP2  | Homo sapiens retinitis pigmentosa 2 (X-linked recessive) (RP2), mRNA [NM_006915]          | 6102 |

|              |      |      |      |      |       |                                                                                         |        |
|--------------|------|------|------|------|-------|-----------------------------------------------------------------------------------------|--------|
| A_23_P255215 | -1.2 | -1.2 | -4.3 | -1.5 | RP9   | Homo sapiens retinitis pigmentosa 9 (autosomal dominant) (RP9), mRNA [NM_203288]        | 6100   |
| A_24_P257759 | 1.3  | 1.3  | 1.3  | 2.2  | RP9   | Homo sapiens retinitis pigmentosa 9 (autosomal dominant) (RP9), mRNA [NM_203288]        | 6100   |
| A_24_P75019  | -2.0 | -2.0 | -2.1 | -2.0 | RP9P  | Homo sapiens retinitis pigmentosa 9 pseudogene (RP9P), non-coding RNA [NR_003500]       | 441212 |
| A_23_P66766  | 2.6  | 1.9  | 1.8  | 1.0  | RPAIN | Homo sapiens RPA interacting protein (RPAIN), transcript variant 4, mRNA [NM_001160246] | 84268  |

|              |     |      |      |      |       |                                                                                             |       |
|--------------|-----|------|------|------|-------|---------------------------------------------------------------------------------------------|-------|
| A_23_P3453   | 8.5 | 4.2  | 9.9  | 5.1  | RPAP1 | Homo sapiens RNA polymerase II associated protein 1 (RPAP1), mRNA [NM_015540]               | 26015 |
| A_23_P23542  | 1.2 | 1.1  | -4.5 | 1.1  | RPAP2 | Homo sapiens RNA polymerase II associated protein 2 (RPAP2), mRNA [NM_024813]               | 79871 |
| A_23_P165301 | 2.3 | 1.3  | 2.3  | 1.9  | RPE   | Homo sapiens ribulose-5-phosphate-3-epimerase (RPE), transcript variant 2, mRNA [NM_006916] | 6120  |
| A_23_P34473  | 1.0 | -1.0 | -5.0 | -1.2 | RPE65 | Homo sapiens retinal pigment epithelium-specific protein 65kDa (RPE65), mRNA [NM_000329]    | 6121  |

|              |      |       |      |      |      |                                                                                                   |       |
|--------------|------|-------|------|------|------|---------------------------------------------------------------------------------------------------|-------|
| A_23_P359616 | 3.5  | 3.5   | 3.5  | 3.5  | RPF1 | Homo sapiens ribosome production factor 1 homolog (S. cerevisiae) (RPF1), mRNA [NM_025065]        | 80135 |
| A_23_P32426  | -1.3 | 3.0   | -1.3 | -1.7 | RPF1 | Homo sapiens ribosome production factor 1 homolog (S. cerevisiae) (RPF1), mRNA [NM_025065]        | 80135 |
| A_23_P19210  | -1.0 | -17.5 | -1.0 | -1.0 | RPF2 | Homo sapiens ribosome production factor 2 homolog (S. cerevisiae) (RPF2), mRNA [NM_032194]        | 84154 |
| A_23_P136964 | 1.5  | 2.1   | -1.1 | -1.4 | RPGR | Homo sapiens retinitis pigmentosa GTPase regulator (RPGR), transcript variant A, mRNA [NM_000328] | 6103  |

|              |      |      |      |      |        |                                                                                                                |       |
|--------------|------|------|------|------|--------|----------------------------------------------------------------------------------------------------------------|-------|
| A_23_P76234  | -2.5 | -2.5 | -6.4 | -3.7 | RPH3A  | Homo sapiens rabphilin 3A homolog (mouse) (RPH3A), transcript variant 1, mRNA [NM_001143854]                   | 22895 |
| A_32_P108636 | -1.3 | -2.1 | 1.3  | -2.1 | RPL10  | Homo sapiens ribosomal protein L10, mRNA (cDNA clone IMAGE:4499390), with apparent retained intron. [BC021806] | 6134  |
| A_23_P251593 | -1.2 | 1.6  | 2.5  | 1.0  | RPL10A | Homo sapiens ribosomal protein L10a (RPL10A), mRNA [NM_007104]                                                 | 4736  |
| A_23_P62605  | 3.1  | 4.3  | 2.4  | 2.6  | RPL11  | Homo sapiens ribosomal protein L11 (RPL11), transcript variant 1, mRNA [NM_000975]                             | 6135  |



|              |      |      |      |      |           |                                                                                           |        |
|--------------|------|------|------|------|-----------|-------------------------------------------------------------------------------------------|--------|
| A_24_P375237 | -4.1 | -2.1 | -3.1 | -2.0 | RPL12     | Homo sapiens ribosomal protein L12 (RPL12), mRNA [NM_000976]                              | 6136   |
| A_32_P92295  | 1.0  | -1.7 | -1.4 | -2.0 | RPL13A    | Homo sapiens ribosomal protein L13a (RPL13A), mRNA [NM_012423]                            | 23521  |
| A_24_P161197 | -2.7 | -1.2 | -1.1 | -5.8 | RPL13AP17 | Homo sapiens ribosomal protein L13a pseudogene 17 (RPL13AP17), non-coding RNA [NR_003680] | 399670 |
| A_24_P272873 | 4.0  | 6.1  | 5.0  | 6.1  | RPL13AP3  | Homo sapiens ribosomal protein L13a pseudogene 3 (RPL13AP3), non-coding RNA [NR_004844]   | 645683 |

|              |      |      |      |      |       |                                                                                       |      |
|--------------|------|------|------|------|-------|---------------------------------------------------------------------------------------|------|
| A_23_P18294  | 1.6  | 1.6  | -3.4 | -2.6 | RPL14 | Homo sapiens ribosomal protein L14 (RPL14), transcript variant 1, mRNA [NM_001034996] | 9045 |
| A_23_P253200 | -1.0 | -2.4 | -1.0 | -1.6 | RPL15 | Homo sapiens ribosomal protein L15 (RPL15), mRNA [NM_002948]                          | 6138 |
| A_32_P158746 | -1.0 | 2.6  | 2.9  | 2.6  | RPL17 | Homo sapiens ribosomal protein L17 (RPL17), transcript variant 1, mRNA [NM_000985]    | 6139 |
| A_24_P356721 | 1.5  | 1.0  | -1.6 | 4.5  | RPL18 | Homo sapiens ribosomal protein L18 (RPL18), mRNA [NM_000979]                          | 6141 |

|              |      |      |      |      |       |                                                                        |      |
|--------------|------|------|------|------|-------|------------------------------------------------------------------------|------|
| A_23_P77779  | 1.5  | 2.2  | -1.2 | 1.2  | RPL19 | Homo sapiens ribosomal protein L19 (RPL19), mRNA [NM_000981]           | 6143 |
| A_32_P16747  | -2.5 | -2.4 | -3.7 | -1.6 | RPL21 | ribosomal protein L21 [Source:HGNC Symbol;Acc:10313] [ENST00000483765] | 6144 |
| A_24_P280901 | 12.9 | 22.2 | 7.1  | 10.6 | RPL21 | Homo sapiens ribosomal protein L21 (RPL21), mRNA [NM_000982]           | 6144 |
| A_24_P830667 | 2.0  | 2.6  | 2.4  | 1.9  | RPL21 | Homo sapiens ribosomal protein L21 (RPL21), mRNA [NM_000982]           | 6144 |
| A_32_P57237  | -3.3 | 1.6  | 1.5  | 1.6  | RPL21 | Homo sapiens ribosomal protein L21 (RPL21), mRNA [NM_000982]           | 6144 |

|              |      |      |      |      |           |                                                                                           |        |
|--------------|------|------|------|------|-----------|-------------------------------------------------------------------------------------------|--------|
| A_24_P41629  | 1.9  | -1.2 | -1.2 | 2.1  | RPL21P44  | Homo sapiens ribosomal protein L21 pseudogene 44 (RPL21P44), non-coding RNA [NR_027153]   | 402176 |
| A_24_P849801 | 1.0  | 1.0  | -1.0 | -2.3 | RPL22     | Homo sapiens ribosomal protein L22 (RPL22), mRNA [NM_000983]                              | 6146   |
| A_24_P67699  | 1.5  | 2.0  | 1.4  | 2.0  | RPL23A    | Homo sapiens ribosomal protein L23a (RPL23A), mRNA [NM_000984]                            | 6147   |
| A_23_P108932 | -1.0 | -3.3 | -1.0 | -1.0 | RPL23AP32 | Homo sapiens ribosomal protein L23a pseudogene 32 (RPL23AP32), non-coding RNA [NR_002229] | 56969  |

|              |      |      |      |      |           |                                                                                           |       |
|--------------|------|------|------|------|-----------|-------------------------------------------------------------------------------------------|-------|
| A_24_P379649 | 1.3  | 1.3  | -2.4 | 1.0  | RPL23AP32 | Homo sapiens ribosomal protein L23a pseudogene 32 (RPL23AP32), non-coding RNA [NR_002229] | 56969 |
| A_23_P33045  | -3.5 | -2.3 | -1.1 | -4.5 | RPL26     | Homo sapiens ribosomal protein L26 (RPL26), mRNA [NM_000987]                              | 6154  |
| A_32_P205553 | 5.5  | -1.2 | -1.8 | -1.3 | RPL26L1   | Homo sapiens ribosomal protein L26-like 1 (RPL26L1), mRNA [NM_016093]                     | 51121 |
| A_24_P916251 | 1.5  | 1.5  | -3.9 | 1.5  | RPL28     | Homo sapiens mRNA for ribosomal protein L28 variant protein. [AB209627]                   | 6158  |

|              |      |      |      |      |       |                                                                                    |      |
|--------------|------|------|------|------|-------|------------------------------------------------------------------------------------|------|
| A_23_P257609 | 2.0  | -2.1 | -3.7 | -1.8 | RPL29 | Homo sapiens ribosomal protein L29 (RPL29), mRNA [NM_000992]                       | 6159 |
| A_32_P162004 | -1.0 | 1.1  | -1.3 | -4.5 | RPL29 | Homo sapiens ribosomal protein L29 (RPL29), mRNA [NM_000992]                       | 6159 |
| A_24_P203909 | 1.9  | 1.7  | -1.3 | -2.3 | RPL34 | Homo sapiens ribosomal protein L34 (RPL34), transcript variant 2, mRNA [NM_033625] | 6164 |
| A_32_P220127 | 2.4  | -1.4 | -2.6 | -1.9 | RPL34 | Homo sapiens ribosomal protein L34 (RPL34), transcript variant 2, mRNA [NM_033625] | 6164 |

|              |     |      |      |      |        |                                                                                      |       |
|--------------|-----|------|------|------|--------|--------------------------------------------------------------------------------------|-------|
| A_23_P112429 | 2.9 | 1.5  | 2.2  | 1.7  | RPL35  | Homo sapiens ribosomal protein L35 (RPL35), mRNA [NM_007209]                         | 11224 |
| A_24_P403403 | 1.9 | 2.2  | 2.8  | 1.3  | RPL35  | Homo sapiens ribosomal protein L35 (RPL35), mRNA [NM_007209]                         | 11224 |
| A_23_P153383 | 2.1 | 1.2  | 1.9  | -1.1 | RPL36  | Homo sapiens ribosomal protein L36 (RPL36), transcript variant 2, mRNA [NM_015414]   | 25873 |
| A_24_P417209 | 1.0 | -5.9 | -1.0 | -1.0 | RPL36A | Homo sapiens ribosomal protein L36a (RPL36A), transcript variant 1, mRNA [NM_021029] | 6173  |

|              |      |      |      |      |           |                                                                                             |        |
|--------------|------|------|------|------|-----------|---------------------------------------------------------------------------------------------|--------|
| A_32_P136319 | -2.3 | -2.4 | -5.3 | -2.5 | RPL36A    | Homo sapiens ribosomal protein L36a (RPL36A), transcript variant 1, mRNA [NM_021029]        | 6173   |
| A_24_P340491 | -1.1 | -1.2 | -1.2 | -7.5 | RPL36AP40 | Homo sapiens ribosomal protein L36a pseudogene, mRNA (cDNA clone IMAGE:6259908). [BC058160] | 554234 |
| A_24_P20777  | 2.3  | 2.2  | 1.9  | 1.6  | RPL37     | Homo sapiens ribosomal protein L37 (RPL37), mRNA [NM_000997]                                | 6167   |
| A_32_P235128 | 1.6  | 2.3  | -1.7 | -2.8 | RPL37     | Homo sapiens ribosomal protein L37 (RPL37), mRNA [NM_000997]                                | 6167   |



|              |      |      |      |      |        |                                                                    |        |
|--------------|------|------|------|------|--------|--------------------------------------------------------------------|--------|
| A_23_P142724 | -1.5 | -1.2 | -2.3 | -2.2 | RPL37A | Homo sapiens ribosomal protein L37a (RPL37A), mRNA [NM_000998]     | 6168   |
| A_23_P34018  | 2.6  | 1.0  | -1.1 | -1.1 | RPL39  | Homo sapiens ribosomal protein L39 (RPL39), mRNA [NM_001000]       | 6170   |
| A_23_P29594  | -1.0 | -2.5 | -1.0 | -1.0 | RPL39L | Homo sapiens ribosomal protein L39-like (RPL39L), mRNA [NM_052969] | 116832 |
| A_23_P118095 | -4.0 | -1.2 | -2.3 | -1.3 | RPL3L  | Homo sapiens ribosomal protein L3-like (RPL3L), mRNA [NM_005061]   | 6123   |
| A_23_P69431  | 2.0  | 1.6  | -1.2 | 2.0  | RPL4   | Homo sapiens ribosomal protein L4 (RPL4), mRNA [NM_000968]         | 6124   |

|              |      |      |      |      |       |                                                                                     |      |
|--------------|------|------|------|------|-------|-------------------------------------------------------------------------------------|------|
| A_23_P12140  | 5.0  | -5.6 | 4.0  | 4.1  | RPL5  | Homo sapiens ribosomal protein L5 (RPL5), mRNA [NM_000969]                          | 6125 |
| A_23_P151321 | 8.4  | 2.3  | 6.4  | 4.6  | RPL6  | Homo sapiens ribosomal protein L6 (RPL6), transcript variant 1, mRNA [NM_001024662] | 6128 |
| A_24_P375813 | 2.6  | -2.5 | -3.3 | -1.0 | RPL7A | Homo sapiens ribosomal protein L7a (RPL7A), mRNA [NM_000972]                        | 6130 |
| A_24_P63262  | -1.1 | -2.1 | -2.1 | -2.0 | RPN1  | Homo sapiens ribophorin I (RPN1), mRNA [NM_002950]                                  | 6184 |
| A_23_P254340 | -1.2 | -1.0 | -3.3 | -1.0 | RPN1  | Homo sapiens ribophorin I (RPN1), mRNA [NM_002950]                                  | 6184 |

|              |      |      |      |      |       |                                                                                               |       |
|--------------|------|------|------|------|-------|-----------------------------------------------------------------------------------------------|-------|
| A_23_P132809 | 1.0  | -1.0 | -1.0 | -4.3 | RPN1  | Homo sapiens ribophorin I (RPN1), mRNA [NM_002950]                                            | 6184  |
| A_23_P108994 | -1.6 | -2.2 | -1.2 | 1.1  | RPN2  | Homo sapiens ribophorin II (RPN2), transcript variant 1, mRNA [NM_002951]                     | 6185  |
| A_23_P214594 | -1.2 | -2.7 | -3.8 | -2.8 | RPP21 | Homo sapiens ribonuclease P/MRP 21kDa subunit (RPP21), transcript variant 2, mRNA [NM_024839] | 79897 |
| A_23_P3424   | 1.2  | 1.8  | 2.3  | 1.0  | RPP25 | Homo sapiens ribonuclease P/MRP 25kDa subunit (RPP25), mRNA [NM_017793]                       | 54913 |

|              |      |      |      |      |        |                                                                                               |       |
|--------------|------|------|------|------|--------|-----------------------------------------------------------------------------------------------|-------|
| A_23_P150080 | 9.8  | 12.6 | 19.8 | 21.4 | RPP38  | Homo sapiens ribonuclease P/MRP 38kDa subunit (RPP38), transcript variant 1, mRNA [NM_183005] | 10557 |
| A_23_P111297 | -1.7 | 1.3  | 2.3  | -1.9 | RPP40  | Homo sapiens ribonuclease P/MRP 40kDa subunit (RPP40), mRNA [NM_006638]                       | 10799 |
| A_24_P382253 | -2.1 | -5.0 | -1.0 | -1.0 | RPRD1A | Homo sapiens regulation of nuclear pre-mRNA domain containing 1A (RPRD1A), mRNA [NM_018170]   | 55197 |
| A_23_P91207  | -2.1 | 1.1  | 1.0  | 1.0  | RPRD1B | Homo sapiens regulation of nuclear pre-mRNA domain containing 1B (RPRD1B), mRNA [NM_021215]   | 58490 |

|              |      |      |      |      |       |                                                                                           |       |
|--------------|------|------|------|------|-------|-------------------------------------------------------------------------------------------|-------|
| A_23_P60657  | -1.2 | 2.1  | 1.6  | 4.5  | RPRD2 | Homo sapiens regulation of nuclear pre-mRNA domain containing 2 (RPRD2), mRNA [NM_015203] | 23248 |
| A_23_P356484 | -1.0 | -3.1 | -3.0 | 1.4  | RPS10 | Homo sapiens ribosomal protein S10 (RPS10), transcript variant 2, mRNA [NM_001014]        | 6204  |
| A_23_P82128  | 4.1  | 4.1  | 3.9  | 2.8  | RPS12 | Homo sapiens ribosomal protein S12 (RPS12), mRNA [NM_001016]                              | 6206  |
| A_32_P86028  | 1.5  | -8.9 | -1.2 | -1.1 | RPS13 | Homo sapiens ribosomal protein S13 (RPS13), mRNA [NM_001017]                              | 6207  |

|              |      |      |      |      |          |                                                                                         |       |
|--------------|------|------|------|------|----------|-----------------------------------------------------------------------------------------|-------|
| A_24_P37939  | -1.3 | -2.0 | 1.1  | -2.4 | RPS14    | ribosomal protein S14<br>[Source:HGNC Symbol;Acc:10387]<br>[ENST00000401695]            | 6208  |
| A_32_P14744  | 1.1  | -3.5 | -1.0 | 1.0  | RPS15A   | Homo sapiens ribosomal protein S15a (RPS15A), transcript variant 2, mRNA<br>[NM_001019] | 6210  |
| A_24_P740705 | -1.1 | -2.6 | 1.9  | 3.0  | RPS19BP1 | Homo sapiens ribosomal protein S19 binding protein 1 (RPS19BP1), mRNA<br>[NM_194326]    | 91582 |
| A_32_P14544  | 7.8  | -2.1 | 7.4  | 9.9  | RPS2     | Homo sapiens ribosomal protein S2 (RPS2), mRNA<br>[NM_002952]                           | 6187  |

|              |      |      |      |      |        |                                                                                      |      |
|--------------|------|------|------|------|--------|--------------------------------------------------------------------------------------|------|
| A_24_P919460 | 1.6  | 1.3  | -1.0 | 2.1  | RPS2   | ribosomal protein S2<br>[Source:HGNC Symbol;Acc:10404]<br>[ENST00000526908]          | 6187 |
| A_32_P84605  | -1.5 | -2.0 | -1.5 | -1.5 | RPS23  | Homo sapiens ribosomal protein S23 (RPS23), mRNA [NM_001025]                         | 6228 |
| A_24_P638294 | -1.4 | 1.1  | -1.8 | -2.1 | RPS26  | Homo sapiens ribosomal protein S26 (RPS26), mRNA [NM_001029]                         | 6231 |
| A_23_P79732  | 2.0  | 1.2  | 1.2  | 1.0  | RPS27A | Homo sapiens ribosomal protein S27a (RPS27A), transcript variant 1, mRNA [NM_002954] | 6233 |
| A_23_P142475 | -1.2 | 1.5  | 1.0  | -4.3 | RPS28  | Homo sapiens ribosomal protein S28 (RPS28), mRNA [NM_001031]                         | 6234 |

|              |      |      |      |      |         |                                                                                       |        |
|--------------|------|------|------|------|---------|---------------------------------------------------------------------------------------|--------|
| A_23_P157196 | 1.4  | 1.0  | -2.2 | 1.4  | RPS2P32 | Homo sapiens ribosomal protein S2 pseudogene 32 (RPS2P32), non-coding RNA [NR_026676] | 256355 |
| A_24_P218765 | 2.3  | 2.3  | 2.2  | 1.2  | RPS3    | ribosomal protein S3 [Source:HGNC Symbol;Acc:10420] [ENST0000531188]                  | 6188   |
| A_32_P58074  | 2.1  | -1.3 | -1.2 | 1.7  | RPS3A   | Homo sapiens ribosomal protein S3A (RPS3A), mRNA [NM_001006]                          | 6189   |
| A_32_P196483 | -3.4 | 1.2  | -3.9 | -1.7 | RPS3A   | Homo sapiens ribosomal protein S3A (RPS3A), mRNA [NM_001006]                          | 6189   |
| A_23_P123563 | 2.0  | -4.8 | -3.0 | -1.5 | RPS6    | Homo sapiens ribosomal protein S6 (RPS6), mRNA [NM_001010]                            | 6194   |



|              |      |       |      |      |         |                                                                                                                  |      |
|--------------|------|-------|------|------|---------|------------------------------------------------------------------------------------------------------------------|------|
| A_23_P335920 | -1.6 | -15.7 | -1.3 | -1.1 | RPS6KA2 | Homo sapiens ribosomal protein S6 kinase, 90kDa, polypeptide 2 (RPS6KA2), transcript variant 1, mRNA [NM_021135] | 6196 |
| A_23_P141329 | 2.4  | 1.2   | 2.3  | 1.7  | RPS6KB1 | Homo sapiens ribosomal protein S6 kinase, 70kDa, polypeptide 1 (RPS6KB1), mRNA [NM_003161]                       | 6198 |
| A_23_P24318  | 1.3  | -3.5  | 1.4  | 1.5  | RPS6KB2 | Homo sapiens ribosomal protein S6 kinase, 70kDa, polypeptide 2 (RPS6KB2), mRNA [NM_003952]                       | 6199 |

|              |      |      |      |      |         |                                                                                |       |
|--------------|------|------|------|------|---------|--------------------------------------------------------------------------------|-------|
| A_24_P219108 | -3.0 | 1.0  | 2.3  | 1.5  | RPS6KL1 | Homo sapiens ribosomal protein S6 kinase-like 1 (RPS6KL1), mRNA [NM_031464]    | 83694 |
| A_32_P20367  | 1.6  | 1.4  | 2.1  | 1.4  | RPS7    | Homo sapiens ribosomal protein S7 (RPS7), mRNA [NM_001011]                     | 6201  |
| A_24_P169378 | 1.5  | -1.4 | -2.5 | -1.2 | RPS7    | Homo sapiens ribosomal protein S7 (RPS7), mRNA [NM_001011]                     | 6201  |
| A_32_P22078  | -1.7 | -2.4 | -1.7 | -1.8 | RPS9    | Homo sapiens ribosomal protein S9 (RPS9), mRNA [NM_001013]                     | 6203  |
| A_32_P223456 | 1.1  | -2.2 | 2.0  | 1.1  | RPS9    | Homo sapiens ribosomal protein S9, mRNA (cDNA clone IMAGE:3856008). [BC020462] | 6203  |

|              |      |      |      |      |        |                                                                                                                  |        |
|--------------|------|------|------|------|--------|------------------------------------------------------------------------------------------------------------------|--------|
| A_32_P219657 | 1.9  | -7.6 | 2.1  | 1.5  | RPSA   | Homo sapiens ribosomal protein SA (RPSA), transcript variant 1, mRNA [NM_002295]                                 | 3921   |
| A_24_P349743 | -1.0 | -1.3 | -3.6 | -1.2 | RPSA   | Homo sapiens ribosomal protein SA (RPSA), transcript variant 1, mRNA [NM_002295]                                 | 3921   |
| A_23_P255916 | -1.6 | -2.4 | -1.2 | -2.4 | RPU3D3 | Homo sapiens RNA pseudouridylylase synthase domain containing 3 (RPU3D3), transcript variant 1, mRNA [NM_173659] | 285367 |

|              |      |      |      |      |        |                                                                                                                  |       |
|--------------|------|------|------|------|--------|------------------------------------------------------------------------------------------------------------------|-------|
| A_24_P318073 | -7.1 | -1.3 | -1.7 | -1.4 | RPUSD4 | Homo sapiens RNA pseudouridylylate synthase domain containing 4 (RPUSD4), transcript variant 1, mRNA [NM_032795] | 84881 |
| A_23_P318039 | 2.1  | 1.6  | 1.8  | 2.7  | RQCD1  | Homo sapiens RCD1 required for cell differentiation1 homolog (S. pombe) (RQCD1), mRNA [NM_005444]                | 9125  |
| A_24_P262127 | 1.7  | -2.7 | 1.0  | -1.7 | RRAD   | Homo sapiens Ras-related associated with diabetes (RRAD), transcript variant 2, mRNA [NM_004165]                 | 6236  |

|              |      |      |      |      |       |                                                                                                          |       |
|--------------|------|------|------|------|-------|----------------------------------------------------------------------------------------------------------|-------|
| A_23_P97623  | -1.8 | -2.9 | -1.8 | 1.2  | RRAGC | Homo sapiens Ras-related GTP binding C (RRAGC), mRNA [NM_022157]                                         | 64121 |
| A_23_P39076  | 2.2  | 2.3  | -1.0 | 1.3  | RRAS  | Homo sapiens related RAS viral (r-ras) oncogene homolog (RRAS), mRNA [NM_006270]                         | 6237  |
| A_23_P214866 | -1.6 | -1.6 | -2.5 | -1.5 | RREB1 | Homo sapiens ras responsive element binding protein 1 (RREB1), transcript variant 1, mRNA [NM_001003699] | 6239  |
| A_24_P234196 | -1.0 | -6.4 | -1.0 | 1.0  | RRM2  | Homo sapiens ribonucleotide reductase M2 (RRM2), transcript variant 2, mRNA [NM_001034]                  | 6241  |

|              |      |      |      |      |        |                                                                                                                              |        |
|--------------|------|------|------|------|--------|------------------------------------------------------------------------------------------------------------------------------|--------|
| A_24_P590560 | 1.1  | 1.0  | -1.1 | -2.1 | RRN3   | Homo sapiens RRN3 RNA polymerase I transcription factor homolog (S. cerevisiae) (RRN3), mRNA [NM_018427]                     | 54700  |
| A_24_P296347 | -1.0 | -3.0 | 1.3  | -1.0 | RRN3   | Homo sapiens RRN3 RNA polymerase I transcription factor homolog (S. cerevisiae) (RRN3), mRNA [NM_018427]                     | 54700  |
| A_24_P475864 | -1.2 | 4.6  | 3.7  | -1.0 | RRN3P2 | Homo sapiens RNA polymerase I transcription factor homolog (S. cerevisiae) pseudogene 2 (RRN3P2), non-coding RNA [NR_003369] | 653390 |

|              |      |      |      |      |        |                                                                                                                              |           |
|--------------|------|------|------|------|--------|------------------------------------------------------------------------------------------------------------------------------|-----------|
| A_32_P138557 | -2.8 | -3.6 | -3.0 | -3.9 | RRN3P3 | Homo sapiens RNA polymerase I transcription factor homolog (S. cerevisiae) pseudogene 3 (RRN3P3), non-coding RNA [NR_027460] | 100131998 |
| A_23_P23356  | -2.3 | 2.2  | 2.0  | 2.0  | RRP15  | Homo sapiens ribosomal RNA processing 15 homolog (S. cerevisiae) (RRP15), mRNA [NM_016052]                                   | 51018     |
| A_23_P308581 | -1.1 | -1.5 | -1.3 | -3.7 | RRP36  | Homo sapiens ribosomal RNA processing 36 homolog (S. cerevisiae) (RRP36), mRNA [NM_033112]                                   | 88745     |

|              |     |      |      |     |       |                                                                                                       |       |
|--------------|-----|------|------|-----|-------|-------------------------------------------------------------------------------------------------------|-------|
| A_23_P420038 | 9.9 | 9.6  | 9.3  | 9.0 | RRP7A | Homo sapiens ribosomal RNA processing 7 homolog A (S. cerevisiae) (RRP7A), mRNA [NM_015703]           | 27341 |
| A_24_P83158  | 1.2 | -1.0 | -5.0 | 1.5 | RRP7B | Homo sapiens ribosomal RNA processing 7 homolog B (S. cerevisiae) (RRP7B), non-coding RNA [NR_002184] | 91695 |
| A_24_P242036 | 3.1 | 1.9  | -1.3 | 1.4 | RRP7B | Homo sapiens ribosomal RNA processing 7 homolog B (S. cerevisiae) (RRP7B), non-coding RNA [NR_002184] | 91695 |



|              |      |     |      |      |       |                                                                                                      |       |
|--------------|------|-----|------|------|-------|------------------------------------------------------------------------------------------------------|-------|
| A_23_P356565 | 1.1  | 1.2 | 2.1  | 1.1  | RRP8  | Homo sapiens ribosomal RNA processing 8, methyltransferase, homolog (yeast) (RRP8), mRNA [NM_015324] | 23378 |
| A_23_P146187 | 2.6  | 2.5 | 1.4  | 2.5  | RRS1  | Homo sapiens RRS1 ribosome biogenesis regulator homolog (S. cerevisiae) (RRS1), mRNA [NM_015169]     | 23212 |
| A_23_P354855 | -1.3 | 4.1 | -1.3 | -1.3 | RS1   | Homo sapiens retinoschisin 1 (RS1), mRNA [NM_000330]                                                 | 6247  |
| A_24_P316965 | -2.4 | 1.8 | 1.4  | 1.7  | RSAD2 | Homo sapiens radical S-adenosyl methionine domain containing 2 (RSAD2), mRNA [NM_080657]             | 91543 |

|              |      |      |      |      |        |                                                                                       |        |
|--------------|------|------|------|------|--------|---------------------------------------------------------------------------------------|--------|
| A_23_P137957 | 6.0  | 2.3  | 2.2  | 1.7  | RSBN1  | Homo sapiens round spermatid basic protein 1 (RSBN1), mRNA [NM_018364]                | 54665  |
| A_24_P925292 | 2.1  | 1.1  | 1.9  | 1.0  | RSBN1L | round spermatid basic protein 1-like [Source:HGNC Symbol;Acc:24765] [ENST00000445288] | 222194 |
| A_24_P246717 | -1.9 | -1.4 | -4.2 | -1.9 | RSF1   | Homo sapiens remodeling and spacing factor 1 (RSF1), mRNA [NM_016578]                 | 51773  |
| A_23_P126499 | 1.0  | -2.4 | -1.7 | 1.5  | RSG1   | Homo sapiens REM2 and RAB-like small GTPase 1 (RSG1), mRNA [NM_030907]                | 79363  |

|              |      |      |      |       |        |                                                                                       |        |
|--------------|------|------|------|-------|--------|---------------------------------------------------------------------------------------|--------|
| A_24_P222022 | 1.6  | -1.5 | -1.4 | -12.2 | RSL1D1 | Homo sapiens ribosomal L1 domain containing 1 (RSL1D1), mRNA [NM_015659]              | 26156  |
| A_23_P54597  | 1.1  | -2.3 | -1.5 | -1.1  | RSL1D1 | Homo sapiens ribosomal L1 domain containing 1 (RSL1D1), mRNA [NM_015659]              | 26156  |
| A_23_P67411  | -1.5 | 2.1  | -2.8 | 1.1   | RSPH6A | Homo sapiens radial spoke head 6 homolog A (Chlamydomonas) (RSPH6A), mRNA [NM_030785] | 81492  |
| A_24_P293698 | -1.6 | 1.0  | -2.4 | -1.9  | RSPO1  | Homo sapiens R-spondin 1 (RSPO1), transcript variant 1, mRNA [NM_001038633]           | 284654 |

|              |       |      |      |      |       |                                                                                      |        |
|--------------|-------|------|------|------|-------|--------------------------------------------------------------------------------------|--------|
| A_23_P22013  | -1.4  | -2.1 | -1.5 | 1.3  | RSPO1 | Homo sapiens R-spondin 1 (RSPO1), transcript variant 1, mRNA [NM_001038633]          | 284654 |
| A_23_P430930 | -1.3  | 2.0  | 2.1  | 2.0  | RSPO2 | Homo sapiens R-spondin 2 (RSPO2), mRNA [NM_178565]                                   | 340419 |
| A_23_P124313 | -3.3  | 1.5  | -3.9 | 1.8  | RSRC1 | arginine/serine-rich coiled-coil 1 [Source:HGNC Symbol;Acc:24152] [ENST00000464171]  | 51319  |
| A_23_P149812 | -18.0 | -1.3 | -1.3 | -1.1 | RSU1  | Homo sapiens Ras suppressor protein 1 (RSU1), transcript variant 1, mRNA [NM_012425] | 6251   |

|              |      |      |      |      |       |                                                                                                                   |       |
|--------------|------|------|------|------|-------|-------------------------------------------------------------------------------------------------------------------|-------|
| A_24_P923061 | -4.7 | 1.3  | 1.3  | -1.3 | RSU1  | Homo sapiens Ras suppressor protein 1, mRNA (cDNA clone IMAGE:3949969), with apparent retained intron. [BC008384] | 6251  |
| A_23_P130653 | 2.8  | -9.3 | 1.3  | 1.1  | RTBDN | Homo sapiens retbindin (RTBDN), transcript variant 2, mRNA [NM_031429]                                            | 83546 |
| A_32_P213624 | -1.0 | -1.1 | -5.3 | -1.4 | RTCD1 | Homo sapiens RNA terminal phosphate cyclase domain 1 (RTCD1), transcript variant 1, mRNA [NM_001130841]           | 8634  |

|              |      |      |      |      |       |                                                                                                               |       |
|--------------|------|------|------|------|-------|---------------------------------------------------------------------------------------------------------------|-------|
| A_23_P29153  | 1.5  | 2.2  | 1.7  | 1.1  | RTDR1 | Homo sapiens rhabdoid tumor deletion region gene 1 (RTDR1), mRNA [NM_014433]                                  | 27156 |
| A_23_P378526 | -1.4 | -1.0 | -2.1 | -3.5 | RTEL1 | Homo sapiens regulator of telomere elongation helicase 1 (RTEL1), transcript variant 1, mRNA [NM_016434]      | 51750 |
| A_23_P77321  | 1.5  | 1.5  | 2.2  | 1.0  | RTF1  | Homo sapiens Rtf1, Paf1/RNA polymerase II complex component, homolog (S. cerevisiae) (RTF1), mRNA [NM_015138] | 23168 |

|              |      |      |      |      |         |                                                                                                               |        |
|--------------|------|------|------|------|---------|---------------------------------------------------------------------------------------------------------------|--------|
| A_24_P390403 | 1.7  | 1.2  | 2.4  | -1.0 | RTF1    | Homo sapiens Rtf1, Paf1/RNA polymerase II complex component, homolog (S. cerevisiae) (RTF1), mRNA [NM_015138] | 23168  |
| A_23_P89902  | -4.9 | -1.1 | -2.5 | -3.1 | RTN2    | Homo sapiens reticulon 2 (RTN2), transcript variant 1, mRNA [NM_005619]                                       | 6253   |
| A_23_P56933  | 2.9  | 2.9  | 2.9  | 2.9  | RTN4    | Homo sapiens reticulon 4 (RTN4), transcript variant 1, mRNA [NM_020532]                                       | 57142  |
| A_23_P432056 | -2.0 | -1.6 | -2.3 | -2.1 | RTN4RL1 | Homo sapiens reticulon 4 receptor-like 1 (RTN4RL1), mRNA [NM_178568]                                          | 146760 |

|              |      |      |      |      |         |                                                                                                  |        |
|--------------|------|------|------|------|---------|--------------------------------------------------------------------------------------------------|--------|
| A_32_P528311 | -2.4 | 1.7  | -1.3 | 2.2  | RTN4RL2 | Homo sapiens reticulon 4 receptor-like 2 (RTN4RL2), mRNA [NM_178570]                             | 349667 |
| A_32_P528967 | -3.5 | -1.6 | -2.5 | 1.1  | RTP1    | Homo sapiens receptor (chemosensory) transporter protein 1 (RTP1), mRNA [NM_153708]              | 132112 |
| A_24_P108301 | 1.6  | 1.4  | -6.2 | -1.2 | RTTN    | Homo sapiens rotatin (RTTN), mRNA [NM_173630]                                                    | 25914  |
| A_24_P380991 | 1.2  | 7.4  | 7.1  | 7.6  | RUFY2   | Homo sapiens RUN and FYVE domain containing 2 (RUFY2), transcript variant 2, mRNA [NM_001042417] | 55680  |



|              |      |      |       |      |       |                                                                                                  |       |
|--------------|------|------|-------|------|-------|--------------------------------------------------------------------------------------------------|-------|
| A_24_P1167   | 27.4 | 20.0 | 10.8  | 18.0 | RUFY2 | Homo sapiens RUN and FYVE domain containing 2 (RUFY2), transcript variant 1, mRNA [NM_017987]    | 55680 |
| A_23_P336083 | 1.8  | 1.8  | -12.3 | 10.7 | RUFY3 | Homo sapiens RUN and FYVE domain containing 3 (RUFY3), transcript variant 2, mRNA [NM_014961]    | 22902 |
| A_24_P362979 | 2.3  | 2.7  | 3.4   | 1.0  | RUFY3 | Homo sapiens RUN and FYVE domain containing 3 (RUFY3), transcript variant 1, mRNA [NM_001037442] | 22902 |
| A_24_P221575 | 1.0  | -1.0 | -1.7  | -3.5 | RUFY3 | Homo sapiens RUN and FYVE domain containing 3 (RUFY3), transcript variant 1, mRNA [NM_001037442] | 22902 |

|              |      |      |      |      |         |                                                                                                                            |        |
|--------------|------|------|------|------|---------|----------------------------------------------------------------------------------------------------------------------------|--------|
| A_24_P263595 | 1.1  | 1.6  | -2.8 | 1.2  | RUNDC2C | Homo sapiens RUN domain containing 2C (RUNDC2C), non-coding RNA [NR_002939]                                                | 440352 |
| A_24_P91094  | -3.5 | 1.0  | -1.7 | -1.0 | RUNDC3A | Homo sapiens RUN domain containing 3A (RUNDC3A), transcript variant 2, mRNA [NM_006695]                                    | 10900  |
| A_23_P427278 | -5.3 | -1.0 | 1.6  | -8.0 | RUNX1T1 | runt-related transcription factor 1; translocated to, 1 (cyclin D-related) [Source:HGNC Symbol;Acc:1535] [ENST00000521751] | 862    |

|              |      |      |      |     |        |                                                                                              |        |
|--------------|------|------|------|-----|--------|----------------------------------------------------------------------------------------------|--------|
| A_24_P2948   | 1.1  | -1.0 | 5.7  | 1.6 | RUSC1  | Homo sapiens RUN and SH3 domain containing 1 (RUSC1), transcript variant 4, mRNA [NM_014328] | 23623  |
| A_23_P39110  | -1.5 | -1.3 | -1.5 | 3.7 | RUVBL2 | Homo sapiens RuvB-like 2 (E. coli) (RUVBL2), mRNA [NM_006666]                                | 10856  |
| A_23_P255076 | -3.6 | 1.0  | -1.0 | 1.1 | RWDD2A | Homo sapiens RWD domain containing 2A (RWDD2A), mRNA [NM_033411]                             | 112611 |
| A_23_P91487  | 1.8  | -1.1 | -1.3 | 2.1 | RWDD2B | Homo sapiens RWD domain containing 2B (RWDD2B), mRNA [NM_016940]                             | 10069  |

|              |      |      |      |      |       |                                                                                                 |        |
|--------------|------|------|------|------|-------|-------------------------------------------------------------------------------------------------|--------|
| A_23_P394276 | 1.0  | -2.3 | 1.1  | 1.0  | RWDD4 | Homo sapiens RWD domain containing 4 (RWDD4), mRNA [NM_152682]                                  | 201965 |
| A_23_P124534 | -1.0 | -1.0 | -4.3 | -1.6 | RXFP1 | relaxin/insulin-like family peptide receptor 1 [Source:HGNC Symbol;Acc:19718] [ENST00000448688] | 59350  |
| A_23_P363365 | 2.2  | 2.8  | 2.3  | 2.2  | RXFP3 | Homo sapiens relaxin/insulin-like family peptide receptor 3 (RXFP3), mRNA [NM_016568]           | 51289  |
| A_24_P930985 | 5.0  | 4.7  | 4.4  | 4.5  | RXRA  | retinoid X receptor, alpha [Source:HGNC Symbol;Acc:10477] [ENST00000484822]                     | 6256   |

|              |      |       |       |      |        |                                                                                                 |       |
|--------------|------|-------|-------|------|--------|-------------------------------------------------------------------------------------------------|-------|
| A_23_P29365  | 1.2  | 1.2   | 1.1   | -5.4 | RYBP   | Homo sapiens RING1 and YY1 binding protein (RYBP), mRNA [NM_012234]                             | 23429 |
| A_24_P229377 | 1.1  | 1.6   | 2.2   | -1.1 | RYK    | Homo sapiens RYK receptor-like tyrosine kinase (RYK), transcript variant 1, mRNA [NM_001005861] | 6259  |
| A_23_P94838  | -1.0 | -10.8 | -1.0  | -1.0 | RYR3   | Homo sapiens ryanodine receptor 3 (RYR3), transcript variant 1, mRNA [NM_001036]                | 6263  |
| A_23_P383227 | 2.8  | 2.2   | -13.5 | 1.2  | S100A1 | Homo sapiens S100 calcium binding protein A1 (S100A1), mRNA [NM_006271]                         | 6271  |

|              |      |      |      |      |         |                                                                                                    |      |
|--------------|------|------|------|------|---------|----------------------------------------------------------------------------------------------------|------|
| A_23_P137984 | 1.1  | -2.2 | -1.2 | 1.0  | S100A10 | Homo sapiens S100 calcium binding protein A10 (S100A10), mRNA [NM_002966]                          | 6281 |
| A_23_P145863 | 1.4  | 2.5  | 1.4  | 1.3  | S100A11 | Homo sapiens S100 calcium binding protein A11 (S100A11), mRNA [NM_005620]                          | 6282 |
| A_23_P74001  | 1.7  | 1.7  | -1.9 | -2.2 | S100A12 | Homo sapiens S100 calcium binding protein A12 (S100A12), mRNA [NM_005621]                          | 6283 |
| A_23_P372874 | -2.3 | -1.5 | 1.2  | -1.5 | S100A13 | Homo sapiens S100 calcium binding protein A13 (S100A13), transcript variant 1, mRNA [NM_001024210] | 6284 |

|              |      |      |       |       |        |                                                                         |      |
|--------------|------|------|-------|-------|--------|-------------------------------------------------------------------------|------|
| A_23_P115467 | 69.2 | 67.4 | 150.4 | 113.5 | S100A5 | Homo sapiens S100 calcium binding protein A5 (S100A5), mRNA [NM_002962] | 6276 |
| A_23_P434809 | 2.6  | 1.8  | -2.1  | -1.2  | S100A8 | Homo sapiens S100 calcium binding protein A8 (S100A8), mRNA [NM_002964] | 6279 |
| A_23_P44996  | -4.4 | -2.1 | -4.2  | -2.0  | S100G  | Homo sapiens S100 calcium binding protein G (S100G), mRNA [NM_004057]   | 795  |
| A_23_P58266  | -2.5 | -1.6 | -1.4  | -1.5  | S100P  | Homo sapiens S100 calcium binding protein P (S100P), mRNA [NM_005980]   | 6286 |

|              |      |      |      |      |         |                                                                                      |       |
|--------------|------|------|------|------|---------|--------------------------------------------------------------------------------------|-------|
| A_23_P338952 | -2.0 | 1.1  | 1.0  | 1.1  | S100BPB | Homo sapiens S100P binding protein (S100PBP), transcript variant 1, mRNA [NM_022753] | 64766 |
| A_32_P827528 | -1.7 | -2.7 | -1.8 | 2.1  | S1PR2   | Homo sapiens sphingosin e-1-phosphate receptor 2 (S1PR2), mRNA [NM_004230]           | 9294  |
| A_23_P112820 | 2.2  | 1.7  | -1.2 | -2.2 | S1PR3   | Homo sapiens sphingosin e-1-phosphate receptor 3 (S1PR3), mRNA [NM_005226]           | 1903  |
| A_23_P119502 | 2.9  | 4.2  | 1.6  | -2.0 | S1PR4   | Homo sapiens sphingosin e-1-phosphate receptor 4 (S1PR4), mRNA [NM_003775]           | 8698  |



|              |      |      |      |      |       |                                                                                      |        |
|--------------|------|------|------|------|-------|--------------------------------------------------------------------------------------|--------|
| A_23_P98622  | -7.7 | -1.0 | -1.1 | -1.0 | SAA2  | Homo sapiens cDNA clone IMAGE:4716555, with apparent retained intron. [BC058008]     | 6289   |
| A_23_P321349 | -1.5 | -1.3 | -2.2 | -1.8 | SAAL1 | Homo sapiens serum amyloid A-like 1 (SAAL1), mRNA [NM_138421]                        | 113174 |
| A_23_P308073 | 2.2  | -1.0 | -1.1 | -1.1 | SACS  | Homo sapiens spastic ataxia of Charlevoix-Saguenay (sacsin) (SACS), mRNA [NM_014363] | 26278  |
| A_24_P111009 | 3.1  | 3.0  | 4.2  | 2.7  | SAFB2 | Homo sapiens scaffold attachment factor B2 (SAFB2), mRNA [NM_014649]                 | 9667   |

|              |      |      |      |      |        |                                                                                    |        |
|--------------|------|------|------|------|--------|------------------------------------------------------------------------------------|--------|
| A_23_P5853   | -6.9 | 1.6  | 1.5  | 1.0  | SAG    | Homo sapiens S-antigen; retina and pineal gland (arrestin) (SAG), mRNA [NM_000541] | 6295   |
| A_23_P48585  | 2.2  | 1.0  | -1.0 | 1.5  | SALL2  | Homo sapiens sal-like 2 (Drosophila) (SALL2), mRNA [NM_005407]                     | 6297   |
| A_23_P393670 | -3.6 | 1.0  | 1.0  | 1.0  | SALL3  | Homo sapiens sal-like 3 (Drosophila) (SALL3), mRNA [NM_171999]                     | 27164  |
| A_24_P402510 | -2.7 | -1.7 | -2.6 | -1.6 | SAMD11 | Homo sapiens sterile alpha motif domain containing 11 (SAMD11), mRNA [NM_152486]   | 148398 |

|              |      |      |      |      |        |                                                                                                           |        |
|--------------|------|------|------|------|--------|-----------------------------------------------------------------------------------------------------------|--------|
| A_32_P47265  | -6.0 | -1.3 | -1.9 | -2.9 | SAMD12 | AV724325<br>HTB Homo sapiens cDNA clone HTBAYE05 5', mRNA sequence [AV724325]                             | 401474 |
| A_32_P130788 | -1.0 | -1.1 | -1.2 | -4.9 | SAMD13 | Homo sapiens sterile alpha motif domain containing 13 (SAMD13), transcript variant 1, mRNA [NM_001010971] | 148418 |
| A_24_P383523 | 1.9  | -1.5 | 2.2  | -4.7 | SAMD4A | Homo sapiens sterile alpha motif domain containing 4A (SAMD4A), transcript variant 1, mRNA [NM_015589]    | 23034  |

|              |      |      |      |      |        |                                                                                      |        |
|--------------|------|------|------|------|--------|--------------------------------------------------------------------------------------|--------|
| A_24_P136758 | 1.9  | 3.1  | 1.7  | 3.2  | SAMD4B | Homo sapiens sterile alpha motif domain containing 4B (SAMD4B), mRNA [NM_018028]     | 55095  |
| A_24_P6449   | 2.4  | 2.4  | 1.0  | -3.2 | SAMD7  | Homo sapiens sterile alpha motif domain containing 7 (SAMD7), mRNA [NM_182610]       | 344658 |
| A_23_P145874 | -2.3 | -1.3 | -1.9 | 1.1  | SAMD9L | Homo sapiens sterile alpha motif domain containing 9-like (SAMD9L), mRNA [NM_152703] | 219285 |

|              |     |     |      |      |         |                                                                                                   |       |
|--------------|-----|-----|------|------|---------|---------------------------------------------------------------------------------------------------|-------|
| A_23_P29005  | 2.5 | 2.5 | 2.5  | 2.4  | SAMSN1  | Homo sapiens SAM domain, SH3 domain and nuclear localization signals 1 (SAMSN1), mRNA [NM_022136] | 64092 |
| A_23_P154188 | 2.1 | 2.0 | 1.8  | 1.9  | SAP130  | Homo sapiens Sin3A-associated protein, 130kDa (SAP130), transcript variant 2, mRNA [NM_024545]    | 79595 |
| A_24_P247794 | 1.4 | 1.3 | -3.2 | 1.0  | SAP130  | Homo sapiens Sin3A-associated protein, 130kDa (SAP130), transcript variant 1, mRNA [NM_001145928] | 79595 |
| A_23_P54953  | 1.2 | 1.2 | -1.5 | -4.1 | SAP30BP | Homo sapiens SAP30 binding protein (SAP30BP), mRNA [NM_013260]                                    | 29115 |

|              |      |      |      |      |        |                                                                                                |       |
|--------------|------|------|------|------|--------|------------------------------------------------------------------------------------------------|-------|
| A_23_P368101 | -1.0 | 1.2  | 2.5  | -1.4 | SAP30L | Homo sapiens SAP30-like (SAP30L), transcript variant 1, mRNA [NM_024632]                       | 79685 |
| A_24_P158421 | -1.0 | -3.0 | -1.0 | 1.1  | SAR1A  | Homo sapiens SAR1 homolog A (S. cerevisiae) (SAR1A), transcript variant 2, mRNA [NM_020150]    | 56681 |
| A_24_P916845 | -2.7 | -1.4 | -2.2 | -4.0 | SAR1B  | Homo sapiens SAR1 homolog B (S. cerevisiae) (SAR1B), transcript variant 1, mRNA [NM_001033503] | 51128 |
| A_24_P267293 | -2.5 | 1.6  | 1.5  | 1.6  | SARM1  | Homo sapiens sterile alpha and TIR motif containing 1 (SARM1), mRNA [NM_015077]                | 23098 |

|             |      |      |      |      |       |                                                                                                |       |
|-------------|------|------|------|------|-------|------------------------------------------------------------------------------------------------|-------|
| A_23_P86884 | 1.1  | 1.5  | -1.0 | -3.1 | SART1 | Homo sapiens squamous cell carcinoma antigen recognized by T cells (SART1), mRNA [NM_005146]   | 9092  |
| A_23_P87664 | -1.1 | -1.1 | -2.5 | -1.9 | SART3 | Homo sapiens squamous cell carcinoma antigen recognized by T cells 3 (SART3), mRNA [NM_014706] | 9733  |
| A_23_P93442 | -3.0 | 1.2  | 1.1  | -2.1 | SASH1 | Homo sapiens SAM and SH3 domain containing 1 (SASH1), mRNA [NM_015278]                         | 23328 |
| A_24_P46689 | 1.4  | -2.4 | -2.1 | -2.0 | SASH1 | Homo sapiens SAM and SH3 domain containing 1 (SASH1), mRNA [NM_015278]                         | 23328 |

|              |      |      |      |      |       |                                                                                                |        |
|--------------|------|------|------|------|-------|------------------------------------------------------------------------------------------------|--------|
| A_23_P33233  | 2.1  | 3.3  | 1.5  | 1.4  | SASH3 | Homo sapiens SAM and SH3 domain containing 3 (SASH3), mRNA [NM_018990]                         | 54440  |
| A_24_P349151 | -2.9 | -1.1 | -6.5 | -4.5 | SASS6 | Homo sapiens spindle assembly 6 homolog (C. elegans) (SASS6), mRNA [NM_194292]                 | 163786 |
| A_23_P15402  | 2.5  | 2.5  | 2.4  | 2.5  | SAT2  | Homo sapiens spermidine/spermine N1-acetyltransferase family member 2 (SAT2), mRNA [NM_133491] | 112483 |
| A_32_P174365 | -1.8 | -1.1 | -2.8 | -2.5 | SATB2 | Homo sapiens SATB homeobox 2 (SATB2), transcript variant 2, mRNA [NM_015265]                   | 23314  |



|              |      |      |      |      |       |                                                                                                         |       |
|--------------|------|------|------|------|-------|---------------------------------------------------------------------------------------------------------|-------|
| A_23_P65555  | -3.1 | -4.1 | -4.8 | -2.0 | SAV1  | Homo sapiens salvador homolog 1 (Drosophila) (SAV1), mRNA [NM_021818]                                   | 60485 |
| A_32_P177024 | 1.3  | -3.1 | 1.2  | -3.0 | SBDS  | Homo sapiens Shwachman-Bodian-Diamond syndrome (SBDS), mRNA [NM_016038]                                 | 51119 |
| A_24_P324630 | 1.0  | -2.0 | -1.1 | -1.3 | SBF2  | SET binding factor 2 [Source:HGNC Symbol;Acc:2135] [ENST00000526353]                                    | 81846 |
| A_32_P8806   | -2.0 | -1.1 | -3.4 | -1.0 | SBNO1 | Homo sapiens strawberry notch homolog 1 (Drosophila) (SBNO1), transcript variant 1, mRNA [NM_001167856] | 55206 |

|             |      |     |     |      |       |                                                                                                                                            |       |
|-------------|------|-----|-----|------|-------|--------------------------------------------------------------------------------------------------------------------------------------------|-------|
| A_23_P98446 | -3.6 | 1.1 | 1.4 | 1.0  | SC5DL | Homo sapiens sterol-C5-desaturase (ERG3 delta-5-desaturase homolog, S. cerevisiae)-like (SC5DL), transcript variant 2, mRNA [NM_001024956] | 6309  |
| A_32_P41026 | -2.5 | 3.3 | 1.4 | -1.5 | SC5DL | Homo sapiens sterol-C5-desaturase (ERG3 delta-5-desaturase homolog, S. cerevisiae)-like (SC5DL), transcript variant 2, mRNA [NM_001024956] | 6309  |
| A_23_P6223  | -2.9 | 1.6 | 1.2 | 1.1  | SCAF4 | Homo sapiens SR-related CTD-associated factor 4 (SCAF4), transcript variant 1, mRNA [NM_020706]                                            | 57466 |

|              |     |     |      |     |      |                                                                                                |        |
|--------------|-----|-----|------|-----|------|------------------------------------------------------------------------------------------------|--------|
| A_23_P325625 | 2.3 | 1.8 | 2.3  | 1.4 | SCAI | Homo sapiens suppressor of cancer cell invasion (SCAI), transcript variant 1, mRNA [NM_173690] | 286205 |
| A_23_P405513 | 1.9 | 1.1 | -5.0 | 1.4 | SCAI | Homo sapiens suppressor of cancer cell invasion (SCAI), transcript variant 1, mRNA [NM_173690] | 286205 |
| A_32_P71113  | 1.7 | 2.3 | 2.3  | 2.2 | SCAI | Homo sapiens suppressor of cancer cell invasion (SCAI), transcript variant 1, mRNA [NM_173690] | 286205 |

|              |       |     |     |     |        |                                                                                                             |        |
|--------------|-------|-----|-----|-----|--------|-------------------------------------------------------------------------------------------------------------|--------|
| A_24_P333341 | -2.4  | 1.0 | 1.1 | 1.0 | SCAMP4 | secretory carrier membrane protein 4 [Source:HGNC Symbol;Acc:30385] [ENST00000452128]                       | 113178 |
| A_23_P6196   | 1.6   | 3.2 | 1.9 | 1.4 | SCAND1 | Homo sapiens SCAN domain containing 1 (SCAND1), transcript variant 1, mRNA [NM_016558]                      | 51282  |
| A_24_P90792  | -18.5 | 1.0 | 1.0 | 1.1 | SCAND2 | Homo sapiens SCAN domain containing 2 pseudogene (SCAND2), transcript variant 1, non-coding RNA [NR_004859] | 54581  |

|              |      |      |      |      |        |                                                                                                    |        |
|--------------|------|------|------|------|--------|----------------------------------------------------------------------------------------------------|--------|
| A_32_P453191 | -4.9 | 1.0  | -1.1 | -1.1 | SCAND3 | Homo sapiens SCAN domain containing 3 (SCAND3), mRNA [NM_052923]                                   | 114821 |
| A_23_P215900 | 1.9  | -3.0 | 1.4  | 1.1  | SCARA3 | Homo sapiens scavenger receptor class A, member 3 (SCARA3), transcript variant 1, mRNA [NM_016240] | 51435  |
| A_23_P372386 | 2.0  | 2.4  | 1.2  | -1.6 | SCARA5 | Homo sapiens scavenger receptor class A, member 5 (putative) (SCARA5), mRNA [NM_173833]            | 286133 |
| A_24_P324565 | 2.3  | 4.1  | 3.7  | 2.1  | SCARB1 | Homo sapiens scavenger receptor class B, member 1 (SCARB1), transcript variant 1, mRNA [NM_005505] | 949    |

|              |      |      |      |      |        |                                                                                                    |       |
|--------------|------|------|------|------|--------|----------------------------------------------------------------------------------------------------|-------|
| A_24_P108738 | -1.1 | 5.8  | -1.0 | -1.1 | SCARF2 | Homo sapiens scavenger receptor class F, member 2 (SCARF2), transcript variant 1, mRNA [NM_153334] | 91179 |
| A_23_P132185 | 1.4  | -5.9 | 1.1  | -1.5 | SCARF2 | Homo sapiens scavenger receptor class F, member 2 (SCARF2), transcript variant 1, mRNA [NM_153334] | 91179 |
| A_23_P62807  | 4.7  | 22.0 | 20.4 | 19.3 | SCCPDH | Homo sapiens saccharopine dehydrogenase (putative) (SCCPDH), mRNA [NM_016002]                      | 51097 |
| A_23_P63618  | 1.3  | 2.7  | -1.1 | 1.5  | SCD    | Homo sapiens stearoyl-CoA desaturase (delta-9-desaturase) (SCD), mRNA [NM_005063]                  | 6319  |

|              |      |      |      |       |       |                                                                                              |       |
|--------------|------|------|------|-------|-------|----------------------------------------------------------------------------------------------|-------|
| A_32_P231415 | 1.3  | -2.3 | -1.4 | 1.8   | SCD   | Homo sapiens PRO1933 mRNA, complete cds. [AF132203]                                          | 6319  |
| A_24_P385134 | -3.7 | -1.8 | 1.0  | -46.6 | SCD5  | Homo sapiens stearyl-CoA desaturase 5 (SCD5), transcript variant 1, mRNA [NM_001037582]      | 79966 |
| A_24_P844995 | -1.0 | -3.9 | -1.1 | -1.0  | SCFD1 | sec1 family domain containing 1 [Source:HGNC Symbol;Acc:20726] [ENST00000556486]             | 23256 |
| A_23_P88209  | 1.0  | -2.2 | -1.0 | -20.2 | SCFD1 | Homo sapiens sec1 family domain containing 1 (SCFD1), transcript variant 1, mRNA [NM_016106] | 23256 |

|              |       |      |      |      |         |                                                                                           |        |
|--------------|-------|------|------|------|---------|-------------------------------------------------------------------------------------------|--------|
| A_23_P92543  | 2.1   | 2.3  | 1.7  | -1.1 | SCFD2   | Homo sapiens sec1 family domain containing 2 (SCFD2), mRNA [NM_152540]                    | 152579 |
| A_23_P62081  | -16.2 | -1.1 | -1.2 | -1.2 | SCG5    | Homo sapiens secretogranin V (7B2 protein) (SCG5), transcript variant 2, mRNA [NM_003020] | 6447   |
| A_23_P150583 | -2.5  | -2.9 | -4.9 | -4.4 | SCGB1A1 | Homo sapiens secretoglobin, family 1A, member 1 (uteroglobin) (SCGB1A1), mRNA [NM_003357] | 7356   |
| A_23_P127781 | -2.3  | 1.0  | 1.0  | -1.5 | SCGB1D1 | Homo sapiens secretoglobin, family 1D, member 1 (SCGB1D1), mRNA [NM_006552]               | 10648  |



|              |      |       |      |      |         |                                                                             |        |
|--------------|------|-------|------|------|---------|-----------------------------------------------------------------------------|--------|
| A_23_P150555 | 2.0  | 1.9   | 2.6  | 1.1  | SCGB1D2 | Homo sapiens secretoglobin, family 1D, member 2 (SCGB1D2), mRNA [NM_006551] | 10647  |
| A_23_P312300 | -1.0 | -2.1  | -1.4 | -1.3 | SCGB2A1 | Homo sapiens secretoglobin, family 2A, member 1 (SCGB2A1), mRNA [NM_002407] | 4246   |
| A_32_P191860 | 1.3  | 2.1   | -1.9 | -1.8 | SCGBL   | Homo sapiens secretoglobin-like (SCGBL), mRNA [NM_001025591]                | 284402 |
| A_23_P28153  | 1.1  | -17.1 | -1.1 | -1.1 | SCLY    | selenocysteine lyase [Source:HGNC Symbol;Acc:18161] [ENST00000409736]       | 51540  |

|              |      |      |      |      |       |                                                                                                                    |      |
|--------------|------|------|------|------|-------|--------------------------------------------------------------------------------------------------------------------|------|
| A_24_P162319 | 1.0  | 1.0  | -3.8 | 1.0  | SCML1 | Homo sapiens sex comb on midleg-like 1 (Drosophila) (SCML1), transcript variant 1, mRNA [NM_001037540]             | 6322 |
| A_23_P28224  | -1.2 | 1.6  | -7.7 | -1.0 | SCN1A | Homo sapiens sodium channel, voltage-gated, type I, alpha subunit (SCN1A), transcript variant 2, mRNA [NM_006920]  | 6323 |
| A_23_P51019  | -4.0 | -3.9 | -2.8 | -4.1 | SCN2A | Homo sapiens sodium channel, voltage-gated, type II, alpha subunit (SCN2A), transcript variant 1, mRNA [NM_021007] | 6326 |

|              |      |      |      |      |       |                                                                                                            |       |
|--------------|------|------|------|------|-------|------------------------------------------------------------------------------------------------------------|-------|
| A_24_P312790 | -1.6 | -2.2 | -1.3 | -2.0 | SCN3B | Homo sapiens sodium channel, voltage-gated, type III, beta (SCN3B), transcript variant 1, mRNA [NM_018400] | 55800 |
| A_24_P270999 | 1.3  | 3.2  | 1.2  | -1.3 | SCN4A | Homo sapiens sodium channel, voltage-gated, type IV, alpha subunit (SCN4A), mRNA [NM_000334]               | 6329  |
| A_23_P303833 | -1.0 | -1.0 | -4.0 | -4.0 | SCN4B | Homo sapiens sodium channel, voltage-gated, type IV, beta (SCN4B), transcript variant 1, mRNA [NM_174934]  | 6330  |

|             |      |     |      |      |       |                                                                                                                      |       |
|-------------|------|-----|------|------|-------|----------------------------------------------------------------------------------------------------------------------|-------|
| A_23_P90944 | -3.9 | 1.3 | 1.7  | 1.6  | SCN7A | Homo sapiens sodium channel, voltage-gated, type VII, alpha (SCN7A), mRNA [NM_002976]                                | 6332  |
| A_23_P76245 | 1.2  | 1.1 | -2.2 | 1.4  | SCN8A | Homo sapiens sodium channel, voltage gated, type VIII, alpha subunit (SCN8A), transcript variant 1, mRNA [NM_014191] | 6334  |
| A_23_P34968 | 2.0  | 3.0 | 2.4  | -1.4 | SCNM1 | Homo sapiens sodium channel modifier 1 (SCNM1), transcript variant 2, mRNA [NM_001204856]                            | 79005 |

|              |      |      |      |      |        |                                                                                                        |       |
|--------------|------|------|------|------|--------|--------------------------------------------------------------------------------------------------------|-------|
| A_24_P259799 | -1.0 | -7.6 | 1.3  | -1.7 | SCNM1  | Homo sapiens sodium channel modifier 1 (SCNM1), transcript variant 2, mRNA [NM_001204856]              | 79005 |
| A_23_P128323 | 2.3  | 2.9  | 1.7  | 1.6  | SCNN1A | Homo sapiens sodium channel, nonvoltage-gated 1 alpha (SCNN1A), transcript variant 1, mRNA [NM_001038] | 6337  |
| A_32_P83098  | -1.2 | -2.1 | -1.3 | -1.3 | SCNN1B | Homo sapiens sodium channel, nonvoltage-gated 1, beta (SCNN1B), mRNA [NM_000336]                       | 6338  |
| A_24_P306499 | 1.2  | -1.3 | -1.4 | -2.5 | SCNN1B | Homo sapiens sodium channel, nonvoltage-gated 1, beta (SCNN1B), mRNA [NM_000336]                       | 6338  |

|              |      |      |       |      |      |                                                                                                                                                             |      |
|--------------|------|------|-------|------|------|-------------------------------------------------------------------------------------------------------------------------------------------------------------|------|
| A_23_P15466  | 1.0  | -1.0 | -4.5  | 1.0  | SCO1 | Homo sapiens SCO cytochrome oxidase deficient homolog 1 (yeast) (SCO1), nuclear gene encoding mitochondrial protein, mRNA [NM_004589]                       | 6341 |
| A_23_P132388 | -2.0 | -1.6 | -33.5 | -2.3 | SCO2 | Homo sapiens SCO cytochrome oxidase deficient homolog 2 (yeast) (SCO2), nuclear gene encoding mitochondrial protein, transcript variant 1, mRNA [NM_005138] | 9997 |

|              |      |      |      |     |       |                                                                                             |       |
|--------------|------|------|------|-----|-------|---------------------------------------------------------------------------------------------|-------|
| A_24_P156922 | 1.0  | -3.7 | -1.1 | 1.7 | SCP2  | Homo sapiens sterol carrier protein 2 (SCP2), transcript variant 2, mRNA [NM_001007098]     | 6342  |
| A_23_P126057 | -2.3 | 1.0  | 1.0  | 1.1 | SCP2  | Homo sapiens sterol carrier protein 2 (SCP2), transcript variant 1, mRNA [NM_002979]        | 6342  |
| A_23_P167159 | 8.6  | 8.4  | 8.5  | 8.6 | SCRG1 | Homo sapiens stimulator of chondrogenesis 1 (SCRG1), mRNA [NM_007281]                       | 11341 |
| A_23_P159039 | -1.0 | 1.5  | 1.2  | 3.2 | SCRIB | Homo sapiens scribbled homolog (Drosophila) (SCRIB), transcript variant 1, mRNA [NM_182706] | 23513 |

|              |      |      |      |      |       |                                                                         |       |
|--------------|------|------|------|------|-------|-------------------------------------------------------------------------|-------|
| A_23_P366366 | -1.6 | 2.5  | 1.5  | 1.0  | SCRN1 | Homo sapiens secernin 1 (SCRN1), transcript variant 2, mRNA [NM_014766] | 9805  |
| A_24_P318593 | 1.4  | -7.1 | -1.6 | -1.3 | SCRN2 | Homo sapiens secernin 2 (SCRN2), transcript variant 1, mRNA [NM_138355] | 90507 |
| A_23_P4323   | 1.5  | -2.5 | 1.1  | 1.2  | SCRN2 | Homo sapiens secernin 2 (SCRN2), transcript variant 1, mRNA [NM_138355] | 90507 |
| A_23_P17012  | 1.0  | -2.1 | -1.1 | 1.0  | SCRN3 | Homo sapiens secernin 3 (SCRN3), transcript variant 1, mRNA [NM_024583] | 79634 |



|              |     |     |     |      |       |                                                                                            |       |
|--------------|-----|-----|-----|------|-------|--------------------------------------------------------------------------------------------|-------|
| A_24_P367138 | 4.1 | 1.6 | 1.8 | 1.6  | SCRT1 | Homo sapiens scratch homolog 1, zinc finger protein (Drosophila) (SCRT1), mRNA [NM_031309] | 83482 |
| A_23_P147782 | 1.3 | 2.1 | 1.6 | -2.8 | SCRT1 | Homo sapiens scratch homolog 1, zinc finger protein (Drosophila) (SCRT1), mRNA [NM_031309] | 83482 |
| A_24_P117782 | 1.0 | 1.3 | 2.7 | 1.4  | SCRT2 | Homo sapiens scratch homolog 2, zinc finger protein (Drosophila) (SCRT2), mRNA [NM_033129] | 85508 |
| A_23_P104594 | 3.0 | 3.1 | 1.5 | -1.3 | SCT   | Homo sapiens secretin (SCT), mRNA [NM_021920]                                              | 6343  |

|              |       |      |      |       |        |                                                                                             |        |
|--------------|-------|------|------|-------|--------|---------------------------------------------------------------------------------------------|--------|
| A_23_P211619 | -2.1  | -1.3 | -5.1 | -10.0 | SCUBE1 | Homo sapiens signal peptide, CUB domain, EGF-like 1 (SCUBE1), mRNA [NM_173050]              | 80274  |
| A_24_P943894 | -1.6  | -1.3 | -2.4 | -1.4  | SCUBE3 | Homo sapiens signal peptide, CUB domain, EGF-like 3 (SCUBE3), mRNA [NM_152753]              | 222663 |
| A_23_P75470  | -15.2 | -2.7 | -1.9 | -3.9  | SCYL1  | Homo sapiens SCY1-like 1 (S. cerevisiae) (SCYL1), transcript variant B, mRNA [NM_001048218] | 57410  |
| A_24_P30314  | -7.2  | -6.4 | -6.7 | -9.0  | SCYL1  | Homo sapiens SCY1-like 1 (S. cerevisiae) (SCYL1), transcript variant A, mRNA [NM_020680]    | 57410  |

|              |      |       |     |     |       |                                                                           |       |
|--------------|------|-------|-----|-----|-------|---------------------------------------------------------------------------|-------|
| A_23_P7056   | -2.0 | 1.4   | 1.1 | 1.0 | SDAD1 | Homo sapiens SDA1 domain containing 1 (SDAD1), mRNA [NM_018115]           | 55153 |
| A_24_P97129  | 1.2  | -20.7 | 1.4 | 1.4 | SDC1  | Homo sapiens syndecan 1 (SDC1), transcript variant 1, mRNA [NM_001006946] | 6382  |
| A_23_P16944  | 2.4  | 1.3   | 2.0 | 1.8 | SDC1  | Homo sapiens syndecan 1 (SDC1), transcript variant 1, mRNA [NM_001006946] | 6382  |
| A_24_P380734 | -2.4 | 1.7   | 1.7 | 1.8 | SDC2  | Homo sapiens syndecan 2 (SDC2), mRNA [NM_002998]                          | 6383  |
| A_23_P109034 | 2.3  | -1.3  | 2.1 | 1.3 | SDC4  | Homo sapiens syndecan 4 (SDC4), mRNA [NM_002999]                          | 6385  |

|              |      |      |      |      |        |                                                                                                                                            |       |
|--------------|------|------|------|------|--------|--------------------------------------------------------------------------------------------------------------------------------------------|-------|
| A_23_P168974 | -5.9 | 1.2  | 1.1  | -1.8 | SDCBP  | Homo sapiens cDNA FLJ46804 fis, clone TRACH3032570, highly similar to Homo sapiens syndecan binding protein (syntenin) (SDCBP). [AK128645] | 6386  |
| A_23_P157580 | 3.2  | 3.2  | 3.2  | 1.7  | SDCBP  | Homo sapiens syndecan binding protein (syntenin) (SDCBP), transcript variant 1, mRNA [NM_005625]                                           | 6386  |
| A_23_P131899 | -1.0 | -1.1 | -3.4 | -1.1 | SDCBP2 | Homo sapiens syndecan binding protein (syntenin) 2 (SDCBP2), transcript variant 1, mRNA [NM_080489]                                        | 27111 |

|              |     |       |      |      |         |                                                                                           |       |
|--------------|-----|-------|------|------|---------|-------------------------------------------------------------------------------------------|-------|
| A_24_P179489 | 2.7 | -17.8 | 3.2  | 2.4  | SDCCAG8 | Homo sapiens serologically defined colon cancer antigen 8 (SDCCAG8), mRNA [NM_006642]     | 10806 |
| A_23_P6344   | 1.7 | 1.8   | 1.1  | 2.5  | SDF2L1  | Homo sapiens stromal cell-derived factor 2-like 1 (SDF2L1), mRNA [NM_022044]              | 23753 |
| A_23_P201338 | 1.0 | -2.4  | -1.1 | -1.0 | SDF4    | Homo sapiens stromal cell derived factor 4 (SDF4), transcript variant 2, mRNA [NM_016176] | 51150 |

|              |      |      |      |      |      |                                                                                                                                                          |      |
|--------------|------|------|------|------|------|----------------------------------------------------------------------------------------------------------------------------------------------------------|------|
| A_23_P149649 | 23.4 | 15.6 | 9.0  | 14.0 | SDHB | Homo sapiens succinate dehydrogenase complex, subunit B, iron sulfur (Ip) (SDHB), nuclear gene encoding mitochondrial protein, mRNA [NM_003000]          | 6390 |
| A_32_P60185  | -4.8 | 1.0  | -1.3 | -3.6 | SDHD | Homo sapiens succinate dehydrogenase complex, subunit D, integral membrane protein (SDHD), nuclear gene encoding mitochondrial protein, mRNA [NM_003002] | 6392 |

|              |      |       |      |      |         |                                                                                                                  |        |
|--------------|------|-------|------|------|---------|------------------------------------------------------------------------------------------------------------------|--------|
| A_24_P16417  | 4.1  | 3.9   | 1.5  | 3.5  | SDK1    | Homo sapiens sidekick homolog 1, cell adhesion molecule (chicken) (SDK1), transcript variant 1, mRNA [NM_152744] | 221935 |
| A_24_P108262 | 1.0  | -12.4 | -1.0 | -1.1 | SDK2    | Homo sapiens sidekick homolog 2 (chicken) (SDK2), mRNA [NM_001144952]                                            | 54549  |
| A_23_P89691  | 1.2  | -1.6  | -3.0 | -2.9 | SDK2    | Homo sapiens sidekick homolog 2 (chicken) (SDK2), mRNA [NM_001144952]                                            | 54549  |
| A_23_P257457 | -4.6 | -1.1  | -1.1 | -1.1 | SDR16C5 | Homo sapiens short chain dehydrogenase/reductase family 16C, member 5 (SDR16C5), mRNA [NM_138969]                | 195814 |

|              |      |      |      |      |         |                                                                                                   |        |
|--------------|------|------|------|------|---------|---------------------------------------------------------------------------------------------------|--------|
| A_23_P163161 | 9.6  | 10.3 | 3.7  | 13.7 | SDR39U1 | Homo sapiens short chain dehydrogenase/reductase family 39U, member 1 (SDR39U1), mRNA [NM_020195] | 56948  |
| A_23_P371758 | -8.4 | -1.5 | -1.5 | -1.5 | SDR9C7  | Homo sapiens short chain dehydrogenase/reductase family 9C, member 7 (SDR9C7), mRNA [NM_148897]   | 121214 |
| A_23_P2645   | 2.5  | 3.2  | 4.4  | -2.3 | SDS     | Homo sapiens serine dehydratase (SDS), mRNA [NM_006843]                                           | 10993  |
| A_23_P53439  | 2.0  | 1.6  | -1.4 | 1.6  | SDSL    | Homo sapiens serine dehydratase-like (SDSL), mRNA [NM_138432]                                     | 113675 |



|              |      |       |      |      |         |                                                                                             |        |
|--------------|------|-------|------|------|---------|---------------------------------------------------------------------------------------------|--------|
| A_23_P17811  | 1.2  | -11.1 | -1.1 | 1.5  | SEC14L2 | Homo sapiens SEC14-like 2 (S. cerevisiae) (SEC14L2), transcript variant 1, mRNA [NM_012429] | 23541  |
| A_32_P101779 | -5.5 | -2.9  | -1.0 | -1.6 | SEC14L3 | Homo sapiens SEC14-like 3 (S. cerevisiae) (SEC14L3), mRNA [NM_174975]                       | 266629 |
| A_23_P251303 | -2.8 | 2.2   | -1.2 | -3.2 | SEC16A  | Homo sapiens SEC16 homolog A (S. cerevisiae) (SEC16A), mRNA [NM_014866]                     | 9919   |

|              |      |      |      |      |        |                                                                                                                           |       |
|--------------|------|------|------|------|--------|---------------------------------------------------------------------------------------------------------------------------|-------|
| A_24_P153734 | 4.6  | 5.6  | 6.2  | 2.6  | SEC16B | Homo sapiens SEC16 homolog B (S. cerevisiae), mRNA (cDNA clone MGC:17455 IMAGE:3448742), complete cds. [BC009106]         | 89866 |
| A_32_P233019 | -1.3 | -2.1 | -1.6 | -1.1 | SEC22A | Homo sapiens SEC22 vesicle trafficking protein homolog A (S. cerevisiae) (SEC22A), mRNA [NM_012430]                       | 26984 |
| A_23_P502641 | 1.0  | 1.1  | 2.0  | 1.1  | SEC22C | Homo sapiens SEC22 vesicle trafficking protein homolog C (S. cerevisiae) (SEC22C), transcript variant 1, mRNA [NM_032970] | 9117  |

|              |      |      |      |      |         |                                                                                                      |       |
|--------------|------|------|------|------|---------|------------------------------------------------------------------------------------------------------|-------|
| A_24_P227017 | 4.6  | 4.4  | 2.0  | 4.3  | SEC23IP | Homo sapiens SEC23 interacting protein (SEC23IP), transcript variant 1, mRNA [NM_007190]             | 11196 |
| A_24_P255338 | -2.5 | -1.8 | -1.5 | -1.4 | SEC24C  | Homo sapiens SEC24 family, member C (S. cerevisiae) (SEC24C), transcript variant 1, mRNA [NM_004922] | 9632  |
| A_23_P170273 | 1.4  | 1.4  | 1.5  | -4.0 | SEC31A  | Homo sapiens SEC31 homolog A (S. cerevisiae) (SEC31A), transcript variant 5, mRNA [NM_001077207]     | 22872 |

|              |      |      |      |      |         |                                                                                                      |       |
|--------------|------|------|------|------|---------|------------------------------------------------------------------------------------------------------|-------|
| A_24_P415280 | -3.9 | -2.5 | -5.1 | -1.2 | SEC61A2 | Homo sapiens Sec61 alpha 2 subunit (S. cerevisiae) (SEC61A2), transcript variant 1, mRNA [NM_018144] | 55176 |
| A_24_P8494   | 3.2  | 2.1  | 1.1  | -1.1 | SEC61B  | Homo sapiens Sec61 beta subunit (SEC61B), mRNA [NM_006808]                                           | 10952 |
| A_23_P357860 | 1.3  | -2.1 | 1.1  | 1.1  | SEC62   | Homo sapiens SEC62 homolog (S. cerevisiae) (SEC62), mRNA [NM_003262]                                 | 7095  |
| A_24_P285880 | -1.8 | -2.0 | -2.1 | -2.0 | SEC62   | Homo sapiens SEC62 homolog (S. cerevisiae) (SEC62), mRNA [NM_003262]                                 | 7095  |

|              |      |      |      |      |           |                                                                                               |       |
|--------------|------|------|------|------|-----------|-----------------------------------------------------------------------------------------------|-------|
| A_24_P402064 | -3.1 | -2.0 | 1.0  | -1.9 | SEC63     | Homo sapiens SEC63 homolog (S. cerevisiae) (SEC63), mRNA [NM_007214]                          | 11231 |
| A_24_P123720 | 2.2  | 2.1  | -1.4 | 1.3  | SEC63     | Homo sapiens SEC63 homolog (S. cerevisiae) (SEC63), mRNA [NM_007214]                          | 11231 |
| A_24_P119482 | 1.3  | -2.0 | -1.8 | -3.6 | SECISBP2  | Homo sapiens SECIS binding protein 2 (SECISBP2), mRNA [NM_024077]                             | 79048 |
| A_24_P82135  | 4.7  | 7.0  | 7.0  | 7.2  | SECISBP2L | Homo sapiens SECIS binding protein 2-like (SECISBP2L), transcript variant 2, mRNA [NM_014701] | 9728  |

|              |      |     |      |      |           |                                                                                               |      |
|--------------|------|-----|------|------|-----------|-----------------------------------------------------------------------------------------------|------|
| A_23_P37415  | 2.7  | 3.1 | -1.1 | 1.1  | SECISBP2L | Homo sapiens SECIS binding protein 2-like (SECISBP2L), transcript variant 2, mRNA [NM_014701] | 9728 |
| A_23_P207905 | -1.2 | 2.1 | 1.1  | 1.6  | SECTM1    | Homo sapiens secreted and transmembrane 1 (SECTM1), mRNA [NM_003004]                          | 6398 |
| A_24_P335656 | 2.4  | 2.5 | -1.0 | 1.1  | SECTM1    | Homo sapiens secreted and transmembrane 1 (SECTM1), mRNA [NM_003004]                          | 6398 |
| A_24_P48204  | -3.3 | 1.2 | -2.2 | -1.0 | SECTM1    | Homo sapiens secreted and transmembrane 1 (SECTM1), mRNA [NM_003004]                          | 6398 |

|              |      |      |      |      |          |                                                                        |        |
|--------------|------|------|------|------|----------|------------------------------------------------------------------------|--------|
| A_23_P74619  | -1.1 | -2.2 | -2.3 | -1.4 | SELENBP1 | Homo sapiens selenium binding protein 1 (SELENBP1), mRNA [NM_003944]   | 8991   |
| A_23_P103522 | -1.3 | -1.3 | -2.1 | -1.5 | SELL     | Homo sapiens selectin L (SELL), transcript variant 1, mRNA [NM_000655] | 6402   |
| A_23_P6413   | 2.2  | 2.1  | 2.1  | -3.0 | SELM     | Homo sapiens selenoprotein M (SELM), mRNA [NM_080430]                  | 140606 |
| A_24_P49322  | 1.8  | 1.6  | -7.9 | -2.0 | SELO     | Homo sapiens selenoprotein O (SELO), mRNA [NM_031454]                  | 83642  |
| A_24_P341853 | -2.1 | -2.1 | -1.1 | 1.4  | SELO     | Homo sapiens selenoprotein O (SELO), mRNA [NM_031454]                  | 83642  |

|              |      |       |      |       |        |                                                                                                                                |        |
|--------------|------|-------|------|-------|--------|--------------------------------------------------------------------------------------------------------------------------------|--------|
| A_23_P256473 | -1.0 | -1.0  | -1.0 | -16.9 | SEMA3C | Homo sapiens sema domain, immunoglobulin domain (Ig), short basic domain, secreted, (semaphorin) 3C (SEMA3C), mRNA [NM_006379] | 10512  |
| A_23_P405287 | 1.0  | -10.1 | -1.0 | -1.1  | SEMA3D | Homo sapiens sema domain, immunoglobulin domain (Ig), short basic domain, secreted, (semaphorin) 3D (SEMA3D), mRNA [NM_152754] | 223117 |



|             |      |      |      |      |        |                                                                                                                                                      |      |
|-------------|------|------|------|------|--------|------------------------------------------------------------------------------------------------------------------------------------------------------|------|
| A_23_P59582 | -4.7 | -1.0 | -1.1 | -1.1 | SEMA3E | Homo sapiens sema domain, immunoglobulin domain (Ig), short basic domain, secreted, (semaphorin) 3E (SEMA3E), transcript variant 1, mRNA [NM_012431] | 9723 |
| A_23_P6878  | 1.1  | -2.1 | -3.2 | 1.0  | SEMA3F | Homo sapiens sema domain, immunoglobulin domain (Ig), short basic domain, secreted, (semaphorin) 3F (SEMA3F), mRNA [NM_004186]                       | 6405 |

|             |      |      |     |      |        |                                                                                                                                                                                |       |
|-------------|------|------|-----|------|--------|--------------------------------------------------------------------------------------------------------------------------------------------------------------------------------|-------|
| A_23_P6818  | -1.6 | -2.6 | 1.0 | 1.2  | SEMA3G | Homo sapiens sema domain, immunoglobulin domain (Ig), short basic domain, secreted, (semaphorin) 3G (SEMA3G), mRNA [NM_020163]                                                 | 56920 |
| A_23_P23438 | 1.6  | -2.9 | 1.2 | -1.0 | SEMA4A | Homo sapiens sema domain, immunoglobulin domain (Ig), transmembrane domain (TM) and short cytoplasmic domain, (semaphorin) 4A (SEMA4A), transcript variant 1, mRNA [NM_022367] | 64218 |

|             |      |      |      |      |        |                                                                                                                                                                                |       |
|-------------|------|------|------|------|--------|--------------------------------------------------------------------------------------------------------------------------------------------------------------------------------|-------|
| A_23_P95165 | 1.4  | -5.7 | -2.1 | -2.8 | SEMA4B | Homo sapiens sema domain, immunoglobulin domain (Ig), transmembrane domain (TM) and short cytoplasmic domain, (semaphorin) 4B (SEMA4B), transcript variant 1, mRNA [NM_020210] | 10509 |
| A_23_P9677  | -1.5 | 1.4  | -3.2 | -2.2 | SEMA4C | Homo sapiens sema domain, immunoglobulin domain (Ig), transmembrane domain (TM) and short cytoplasmic domain, (semaphorin) 4C (SEMA4C), mRNA [NM_017789]                       | 54910 |

|              |     |      |      |      |        |                                                                                                                                                                                                              |       |
|--------------|-----|------|------|------|--------|--------------------------------------------------------------------------------------------------------------------------------------------------------------------------------------------------------------|-------|
| A_23_P121374 | 1.0 | -1.0 | -1.1 | -3.5 | SEMA5B | Homo sapiens sema domain, seven thrombospondin repeats (type 1 and type 1-like), transmembrane domain (TM) and short cytoplasmic domain, (semaphorin) 5B (SEMA5B), transcript variant 1, mRNA [NM_001031702] | 54437 |
| A_24_P857669 | 3.2 | 1.2  | 3.0  | 1.6  | SEMA6A | sema domain, transmembrane domain (TM), and cytoplasmic domain, (semaphorin) 6A [Source:HGNC Symbol;Acc:10738] [ENST00000513137]                                                                             | 57556 |

|              |     |     |      |     |        |                                                                                                                                               |       |
|--------------|-----|-----|------|-----|--------|-----------------------------------------------------------------------------------------------------------------------------------------------|-------|
| A_23_P208900 | 2.2 | 1.5 | -1.4 | 1.7 | SEMA6B | Homo sapiens sema domain, transmembrane domain (TM), and cytoplasmic domain, (semaphorin) 6B (SEMA6B), mRNA [NM_032108]                       | 10501 |
| A_23_P138000 | 1.3 | 1.4 | -2.4 | 1.2 | SEMA6C | Homo sapiens sema domain, transmembrane domain (TM), and cytoplasmic domain, (semaphorin) 6C (SEMA6C), transcript variant 2, mRNA [NM_030913] | 10500 |

|              |      |      |      |      |        |                                                                                                                                               |       |
|--------------|------|------|------|------|--------|-----------------------------------------------------------------------------------------------------------------------------------------------|-------|
| A_23_P420442 | -1.1 | -1.1 | 2.0  | -1.0 | SEMA6D | Homo sapiens sema domain, transmembrane domain (TM), and cytoplasmic domain, (semaphorin) 6D (SEMA6D), transcript variant 4, mRNA [NM_153618] | 80031 |
| A_23_P5968   | 1.1  | -2.6 | -2.4 | 1.0  | SEMG2  | Homo sapiens semenogelin II (SEMG2), mRNA [NM_003008]                                                                                         | 6407  |
| A_24_P167412 | -2.6 | 1.3  | 1.2  | 1.3  | SENP1  | Homo sapiens SUMO1/sentrin specific peptidase 1 (SENP1), mRNA [NM_014554]                                                                     | 29843 |
| A_32_P74712  | 8.3  | 8.2  | 7.9  | 8.2  | SENP2  | Homo sapiens SUMO1/sentrin/SMT3 specific peptidase 2 (SENP2), mRNA [NM_021627]                                                                | 59343 |

|              |     |     |      |      |      |                                                                                                                             |        |
|--------------|-----|-----|------|------|------|-----------------------------------------------------------------------------------------------------------------------------|--------|
| A_24_P106382 | 2.4 | 3.1 | 2.2  | 1.9  | SEN6 | Homo sapiens cDNA FLJ10544 fis, clone NT2RP2001601, highly similar to Sentrin-specific protease 6 (EC 3.4.22.-). [AK001406] | 26054  |
| A_23_P214156 | 1.0 | 1.0 | -8.2 | -1.0 | SEN6 | Homo sapiens SUMO1/sentrin specific peptidase 6 (SEN6), transcript variant 1, mRNA [NM_015571]                              | 26054  |
| A_23_P334263 | 1.9 | 2.9 | 1.7  | 3.8  | SEN8 | Homo sapiens SUMO/sentrin specific peptidase family member 8 (SEN8), transcript variant 2, mRNA [NM_145204]                 | 123228 |

|              |       |      |      |      |         |                                                                                                        |       |
|--------------|-------|------|------|------|---------|--------------------------------------------------------------------------------------------------------|-------|
| A_23_P370625 | -1.4  | -2.8 | 1.8  | -4.7 | SEP1    | Homo sapiens selenoprotein N, 1 (SEP1), transcript variant 1, mRNA [NM_020451]                         | 57190 |
| A_24_P377183 | -11.9 | 1.3  | 1.2  | -1.1 | SEPSECS | Homo sapiens Sep (O-phosphoserine) tRNA:Sec (selenocysteine) tRNA synthase (SEPSECS), mRNA [NM_016955] | 51091 |
| A_23_P167201 | -4.4  | -1.0 | -4.3 | -1.1 | SEPSECS | Homo sapiens Sep (O-phosphoserine) tRNA:Sec (selenocysteine) tRNA synthase (SEPSECS), mRNA [NM_016955] | 51091 |



|              |      |      |      |      |         |                                                                                                       |        |
|--------------|------|------|------|------|---------|-------------------------------------------------------------------------------------------------------|--------|
| A_24_P75879  | -1.0 | -2.8 | -1.0 | -1.0 | SEPT7P2 | Homo sapiens septin 7 pseudogene 2 (SEPT7P2), non-coding RNA [NR_024271]                              | 641977 |
| A_32_P187599 | -1.1 | -1.0 | -3.1 | -4.5 | SERBP1  | Homo sapiens SERPINE1 mRNA binding protein 1 (SERBP1), transcript variant 1, mRNA [NM_001018067]      | 26135  |
| A_24_P935881 | 1.3  | 1.2  | 1.4  | -2.0 | SERF1B  | Homo sapiens small EDRK-rich factor 1B (centromeric) (SERF1B), transcript variant 2, mRNA [NM_022978] | 728492 |
| A_24_P313334 | -4.7 | -1.0 | -1.0 | 1.0  | SERF2   | Homo sapiens small EDRK-rich factor 2 (SERF2), transcript variant 4, mRNA [NM_001199877]              | 10169  |

|              |      |      |      |      |         |                                                                                                 |        |
|--------------|------|------|------|------|---------|-------------------------------------------------------------------------------------------------|--------|
| A_24_P364087 | 2.4  | -1.3 | -1.0 | -1.3 | SERGEF  | Homo sapiens secretion regulating guanine nucleotide exchange factor (SERGEF), mRNA [NM_012139] | 26297  |
| A_23_P120953 | 2.0  | 2.0  | 3.2  | 1.0  | SERHL2  | Homo sapiens serine hydrolase-like 2 (SERHL2), mRNA [NM_014509]                                 | 253190 |
| A_24_P129232 | -1.0 | -3.3 | -1.2 | -1.9 | SERINC1 | Homo sapiens serine incorporator 1 (SERINC1), mRNA [NM_020755]                                  | 57515  |
| A_23_P147326 | 2.1  | 1.7  | 1.8  | 1.6  | SERINC2 | Homo sapiens serine incorporator 2 (SERINC2), transcript variant 1, mRNA [NM_178865]            | 347735 |

|              |      |     |      |      |         |                                                                                                                                          |        |
|--------------|------|-----|------|------|---------|------------------------------------------------------------------------------------------------------------------------------------------|--------|
| A_24_P160586 | 1.4  | 3.2 | 1.5  | 2.6  | SERINC4 | serine<br>incorporat<br>or 4<br>[Source:H<br>GNC<br>Symbol;Ac<br>c:32237]<br>[ENST0000<br>0476490]                                       | 619189 |
| A_32_P138977 | 1.4  | 1.4 | 1.0  | -3.1 | SERINC4 | serine<br>incorporat<br>or 4<br>[Source:H<br>GNC<br>Symbol;Ac<br>c:32237]<br>[ENST0000<br>0319327]                                       | 619189 |
| A_23_P423457 | -1.6 | 2.9 | -1.1 | 1.2  | SERINC5 | Homo<br>sapiens<br>serine<br>incorporat<br>or 5<br>(SERINC5),<br>transcript<br>variant 2,<br>mRNA<br>[NM_1782<br>76]                     | 256987 |
| A_24_P579862 | 2.1  | 2.1 | 1.0  | -1.2 | SERP1   | stress-<br>associated<br>endoplas<br>mic<br>reticulum<br>protein 1<br>[Source:H<br>GNC<br>Symbol;Ac<br>c:10759]<br>[ENST0000<br>0490945] | 27230  |

|              |      |     |      |      |           |                                                                                                                                                            |        |
|--------------|------|-----|------|------|-----------|------------------------------------------------------------------------------------------------------------------------------------------------------------|--------|
| A_23_P218111 | -2.6 | 1.7 | -1.2 | -4.5 | SERPINA1  | Homo sapiens serpin peptidase inhibitor, clade A (alpha-1 antiprotei nase, antitrypsin ), member 1 (SERPINA1 ), transcript variant 2, mRNA [NM_0010 02236] | 5265   |
| A_23_P88177  | 4.0  | 2.9 | 3.0  | 1.9  | SERPINA12 | Homo sapiens serpin peptidase inhibitor, clade A (alpha-1 antiprotei nase, antitrypsin ), member 12 (SERPINA1 2), mRNA [NM_1738 50]                        | 145264 |

|              |       |      |      |      |           |                                                                                                                                                      |        |
|--------------|-------|------|------|------|-----------|------------------------------------------------------------------------------------------------------------------------------------------------------|--------|
| A_24_P341116 | -36.3 | -1.0 | -1.1 | -1.0 | SERPINA13 | Homo sapiens serpin peptidase inhibitor, clade A (alpha-1 antiprotease, antitrypsin), member 13 (pseudogene) (SERPINA13), non-coding RNA [NR_015340] | 388007 |
| A_23_P44663  | 2.3   | -1.6 | -1.3 | -1.7 | SERPINA2  | PREDICTED: Homo sapiens serpin peptidase inhibitor, clade A (alpha-1 antiprotease, antitrypsin), member 2 (SERPINA2), miscRNA [XR_110240]            | 390502 |

|              |      |      |      |      |          |                                                                                                                                   |      |
|--------------|------|------|------|------|----------|-----------------------------------------------------------------------------------------------------------------------------------|------|
| A_23_P117363 | -1.0 | -1.6 | -2.3 | -2.3 | SERPINA6 | Homo sapiens serpin peptidase inhibitor, clade A (alpha-1 antiprotei nase, antitrypsin ), member 6 (SERPINA6 ), mRNA [NM_0017 56] | 866  |
| A_23_P257307 | -2.9 | 1.4  | 1.4  | 1.4  | SERPINA7 | Homo sapiens serpin peptidase inhibitor, clade A (alpha-1 antiprotei nase, antitrypsin ), member 7 (SERPINA7 ), mRNA [NM_0003 54] | 6906 |

|              |      |      |      |      |          |                                                                                                                                                        |        |
|--------------|------|------|------|------|----------|--------------------------------------------------------------------------------------------------------------------------------------------------------|--------|
| A_23_P372478 | 5.3  | 1.3  | 2.6  | 2.9  | SERPINA9 | Homo sapiens serpin peptidase inhibitor, clade A (alpha-1 antiprotei nase, antitrypsin ), member 9 (SERPINA9 ), transcript variant A, mRNA [NM_175739] | 327657 |
| A_24_P269315 | -2.9 | -1.8 | -7.2 | -2.6 | SERPINB1 | serpin peptidase inhibitor, clade B (ovalbumi n), member 1 [Source:H GNC Symbol;Acc:3311] [ENST00000380739]                                            | 1992   |

|              |      |      |      |     |           |                                                                                                                         |       |
|--------------|------|------|------|-----|-----------|-------------------------------------------------------------------------------------------------------------------------|-------|
| A_23_P130411 | -1.6 | 1.4  | -2.0 | 1.0 | SERPINB11 | Homo sapiens serpin peptidase inhibitor, clade B (ovalbumin), member 11 (gene/pseudogene) (SERPINB11), mRNA [NM_080475] | 89778 |
| A_23_P107623 | 1.0  | 1.0  | -6.1 | 1.1 | SERPINB12 | Homo sapiens serpin peptidase inhibitor, clade B (ovalbumin), member 12 (SERPINB12), mRNA [NM_080474]                   | 89777 |
| A_23_P432978 | 1.0  | -9.7 | 1.0  | 1.3 | SERPINB13 | Homo sapiens serpin peptidase inhibitor, clade B (ovalbumin), member 13 (SERPINB13), mRNA [NM_012397]                   | 5275  |



|              |      |      |      |      |           |                                                                                                                              |      |
|--------------|------|------|------|------|-----------|------------------------------------------------------------------------------------------------------------------------------|------|
| A_23_P119015 | -2.7 | -1.1 | -1.2 | -1.2 | SERPINB13 | Homo sapiens serpin peptidase inhibitor, clade B (ovalbumin), member 13 (SERPINB13), mRNA [NM_012397]                        | 5275 |
| A_23_P153185 | -1.6 | -1.6 | -2.5 | -2.0 | SERPINB2  | Homo sapiens serpin peptidase inhibitor, clade B (ovalbumin), member 2 (SERPINB2), transcript variant 1, mRNA [NM_001143818] | 5055 |
| A_24_P245379 | 4.6  | 10.8 | 6.3  | 5.5  | SERPINB2  | Homo sapiens serpin peptidase inhibitor, clade B (ovalbumin), member 2 (SERPINB2), transcript variant 2, mRNA [NM_002575]    | 5055 |

|              |      |      |      |     |          |                                                                                                     |      |
|--------------|------|------|------|-----|----------|-----------------------------------------------------------------------------------------------------|------|
| A_23_P208126 | 1.6  | -2.5 | 1.6  | 1.0 | SERPINB5 | Homo sapiens serpin peptidase inhibitor, clade B (ovalbumin), member 5 (SERPINB5), mRNA [NM_002639] | 5268 |
| A_23_P30687  | -2.3 | 1.4  | 1.0  | 1.0 | SERPINB9 | Homo sapiens serpin peptidase inhibitor, clade B (ovalbumin), member 9 (SERPINB9), mRNA [NM_004155] | 5272 |
| A_32_P38323  | 1.1  | -4.3 | -1.0 | 1.1 | SERPINB9 | Homo sapiens serpin peptidase inhibitor, clade B (ovalbumin), member 9 (SERPINB9), mRNA [NM_004155] | 5272 |

|              |     |       |      |      |          |                                                                                                                                                               |        |
|--------------|-----|-------|------|------|----------|---------------------------------------------------------------------------------------------------------------------------------------------------------------|--------|
| A_23_P50919  | 1.1 | -12.4 | 1.1  | 1.1  | SERPINE2 | Homo sapiens serpin peptidase inhibitor, clade E (nexin, plasminogen activator inhibitor type 1), member 2 (SERPINE2), transcript variant 1, mRNA [NM_006216] | 5270   |
| A_23_P162861 | 1.1 | -5.7  | -1.1 | -1.0 | SERPINE3 | Homo sapiens serpin peptidase inhibitor, clade E (nexin, plasminogen activator inhibitor type 1), member 3 (SERPINE3), mRNA [NM_001101320]                    | 647174 |

|              |      |      |      |      |          |                                                                                                                                                                        |       |
|--------------|------|------|------|------|----------|------------------------------------------------------------------------------------------------------------------------------------------------------------------------|-------|
| A_23_P89270  | -1.1 | -4.1 | 1.5  | -2.3 | SERPINF2 | Homo sapiens serpin peptidase inhibitor, clade F (alpha-2 antiplasmin, pigment epithelium derived factor), member 2 (SERPINF2), transcript variant 1, mRNA [NM_000934] | 5345  |
| A_23_P132826 | -1.1 | -1.9 | -2.6 | -2.3 | SERPINI2 | Homo sapiens serpin peptidase inhibitor, clade I (pancpin), member 2 (SERPINI2), mRNA [NM_006217]                                                                      | 5276  |
| A_23_P141960 | 1.8  | -1.6 | -2.5 | 1.0  | SERTAD3  | Homo sapiens SERTA domain containing 3 (SERTAD3), transcript variant 2, mRNA [NM_203344]                                                                               | 29946 |

|              |      |      |      |      |         |                                                                                     |        |
|--------------|------|------|------|------|---------|-------------------------------------------------------------------------------------|--------|
| A_23_P318904 | 1.0  | 1.0  | -2.9 | 1.0  | SERTAD4 | Homo sapiens SERTA domain containing 4 (SERTAD4), mRNA [NM_019605]                  | 56256  |
| A_23_P35082  | -2.4 | 1.1  | -1.0 | -1.0 | SESN2   | Homo sapiens sestrin 2 (SESN2), mRNA [NM_031459]                                    | 83667  |
| A_24_P918706 | -3.1 | -1.5 | -3.0 | -3.0 | SESN3   | sestrin 3 [Source:HGNC Symbol;Acc:23060] [ENST00000536441]                          | 143686 |
| A_23_P367610 | -2.6 | 2.2  | 2.3  | 1.6  | SESTD1  | Homo sapiens SEC14 and spectrin domains 1 (SESTD1), mRNA [NM_178123]                | 91404  |
| A_23_P4551   | -2.3 | -4.6 | -2.0 | -4.7 | SETBP1  | Homo sapiens SET binding protein 1 (SETBP1), transcript variant 1, mRNA [NM_015559] | 26040  |

|              |      |      |       |      |       |                                                                                      |       |
|--------------|------|------|-------|------|-------|--------------------------------------------------------------------------------------|-------|
| A_23_P44760  | -1.6 | -1.1 | 1.0   | 2.8  | SETD2 | Homo sapiens SET domain containing 2 (SETD2), mRNA [NM_014159]                       | 29072 |
| A_23_P21219  | -1.5 | -1.3 | -2.4  | 1.4  | SETD2 | Homo sapiens SET domain containing 2 (SETD2), mRNA [NM_014159]                       | 29072 |
| A_23_P25989  | 1.2  | -7.8 | -1.0  | -1.0 | SETD3 | Homo sapiens SET domain containing 3 (SETD3), transcript variant 1, mRNA [NM_032233] | 84193 |
| A_23_P212204 | -1.0 | -1.0 | -15.5 | -1.0 | SETD5 | Homo sapiens mRNA; cDNA DKFZp686A20205 (from clone DKFZp686A20205). [BX648380]       | 55209 |

|              |       |      |      |      |        |                                                                                           |        |
|--------------|-------|------|------|------|--------|-------------------------------------------------------------------------------------------|--------|
| A_24_P944427 | 1.0   | -1.1 | -5.4 | -1.0 | SETD5  | Homo sapiens SET domain containing 5 (SETD5), mRNA [NM_001080517]                         | 55209  |
| A_23_P129358 | 1.1   | 1.0  | -1.0 | 2.1  | SETD6  | Homo sapiens SET domain containing 6 (SETD6), transcript variant 2, mRNA [NM_024860]      | 79918  |
| A_32_P191527 | -1.2  | 1.1  | -4.1 | -1.1 | SETD8  | Homo sapiens SET domain containing (lysine methyltransferase) 8 (SETD8), mRNA [NM_020382] | 387893 |
| A_32_P154121 | -15.8 | 1.1  | -1.0 | -1.0 | SETDB2 | Homo sapiens SET domain, bifurcated 2 (SETDB2), transcript variant 1, mRNA [NM_031915]    | 83852  |

|              |      |      |      |      |        |                                                                                                        |        |
|--------------|------|------|------|------|--------|--------------------------------------------------------------------------------------------------------|--------|
| A_24_P917261 | -1.0 | -1.1 | -3.2 | -1.1 | SETX   | Homo sapiens senataxin (SETX), mRNA [NM_015046]                                                        | 23064  |
| A_23_P389569 | -1.3 | -2.0 | 1.6  | -1.6 | SEZ6   | Homo sapiens seizure related 6 homolog (mouse) (SEZ6), transcript variant 1, mRNA [NM_178860]          | 124925 |
| A_24_P116587 | 3.2  | 2.6  | 2.1  | 2.4  | SEZ6L2 | Homo sapiens seizure related 6 homolog (mouse)-like 2 (SEZ6L2), transcript variant 2, mRNA [NM_201575] | 26470  |
| A_23_P10194  | 2.5  | 3.7  | 2.2  | 2.0  | SEZ6L2 | Homo sapiens seizure related 6 homolog (mouse)-like 2 (SEZ6L2), transcript variant 2, mRNA [NM_201575] | 26470  |



|              |      |      |      |      |       |                                                                                                    |       |
|--------------|------|------|------|------|-------|----------------------------------------------------------------------------------------------------|-------|
| A_24_P374154 | 1.0  | 1.5  | -2.7 | 1.1  | SF3A1 | Homo sapiens splicing factor 3a, subunit 1, 120kDa (SF3A1), transcript variant 1, mRNA [NM_005877] | 10291 |
| A_23_P64083  | -1.1 | -1.8 | -2.2 | -1.2 | SF3B2 | Homo sapiens splicing factor 3b, subunit 2, 145kDa (SF3B2), mRNA [NM_006842]                       | 10992 |
| A_32_P173298 | -2.1 | 1.0  | -2.1 | 1.0  | SF3B3 | Homo sapiens splicing factor 3b, subunit 3, 130kDa (SF3B3), mRNA [NM_012426]                       | 23450 |
| A_23_P35131  | 14.6 | 19.8 | 14.3 | 10.9 | SF3B4 | Homo sapiens splicing factor 3b, subunit 4, 49kDa (SF3B4), mRNA [NM_005850]                        | 10262 |

|              |      |      |      |      |        |                                                                                                                  |       |
|--------------|------|------|------|------|--------|------------------------------------------------------------------------------------------------------------------|-------|
| A_24_P242021 | 3.5  | 1.9  | -1.7 | 2.6  | SFI1   | Homo sapiens Sfi1 homolog, spindle assembly associated (yeast) (SFI1), transcript variant 1, mRNA [NM_001007467] | 9814  |
| A_24_P417460 | -1.0 | -2.1 | -1.6 | -1.2 | SFMBT2 | Homo sapiens Scm-like with four mbt domains 2 (SFMBT2), transcript variant 1, mRNA [NM_001029880]                | 57713 |
| A_32_P98291  | -1.0 | -1.1 | -3.7 | -1.1 | SFMBT2 | Homo sapiens Scm-like with four mbt domains 2 (SFMBT2), transcript variant 1, mRNA [NM_001029880]                | 57713 |
| A_23_P63254  | 2.4  | -1.2 | 2.1  | -1.0 | SFN    | Homo sapiens stratifin (SFN), mRNA [NM_006142]                                                                   | 2810  |

|              |      |      |      |      |       |                                                                            |      |
|--------------|------|------|------|------|-------|----------------------------------------------------------------------------|------|
| A_23_P10121  | 1.1  | 1.0  | 2.2  | 1.1  | SFRP1 | Homo sapiens secreted frizzled-related protein 1 (SFRP1), mRNA [NM_003012] | 6422 |
| A_24_P934546 | -3.0 | -1.1 | -2.7 | 1.4  | SFRP2 | Homo sapiens secreted frizzled-related protein 2 (SFRP2), mRNA [NM_003013] | 6423 |
| A_24_P137501 | 2.5  | 4.0  | 2.4  | 3.4  | SFRP2 | Homo sapiens secreted frizzled-related protein 2 (SFRP2), mRNA [NM_003013] | 6423 |
| A_23_P215328 | -1.2 | -3.0 | -1.3 | -1.3 | SFRP4 | Homo sapiens secreted frizzled-related protein 4 (SFRP4), mRNA [NM_003014] | 6424 |

|              |       |      |      |      |        |                                                                                                           |        |
|--------------|-------|------|------|------|--------|-----------------------------------------------------------------------------------------------------------|--------|
| A_23_P1352   | 1.0   | -2.3 | 1.0  | 1.0  | SFRP5  | Homo sapiens secreted frizzled-related protein 5 (SFRP5), mRNA [NM_003015]                                | 6425   |
| A_32_P109704 | -17.5 | -1.0 | 1.6  | 2.1  | SFSWAP | Homo sapiens splicing factor, suppressor of white-apricot homolog (Drosophila) (SFSWAP), mRNA [NM_004592] | 6433   |
| A_23_P321959 | 1.1   | -2.1 | 1.3  | -1.3 | SFT2D1 | Homo sapiens SFT2 domain containing 1 (SFT2D1), mRNA [NM_145169]                                          | 113402 |
| A_24_P923749 | -1.8  | -2.7 | -2.6 | -1.3 | SFT2D3 | Homo sapiens SFT2 domain containing 3 (SFT2D3), mRNA [NM_032740]                                          | 84826  |

|              |      |      |      |      |        |                                                                                     |        |
|--------------|------|------|------|------|--------|-------------------------------------------------------------------------------------|--------|
| A_23_P5568   | -1.3 | -1.8 | -2.0 | -1.0 | SFT2D3 | Homo sapiens SFT2 domain containing 3 (SFT2D3), mRNA [NM_032740]                    | 84826  |
| A_23_P115652 | -3.3 | -1.3 | -5.2 | 1.4  | SFTPA1 | Homo sapiens surfactant protein A1 (SFTPA1), transcript variant 1, mRNA [NM_005411] | 653509 |
| A_23_P17044  | 3.9  | -5.4 | 3.2  | 1.6  | SFTPB  | Homo sapiens surfactant protein B (SFTPB), transcript variant 1, mRNA [NM_000542]   | 6439   |
| A_23_P95213  | 1.7  | 1.6  | 1.4  | 6.0  | SFTPC  | Homo sapiens surfactant protein C (SFTPC), transcript variant 1, mRNA [NM_003018]   | 6440   |

|              |      |      |      |      |       |                                                                                                                           |       |
|--------------|------|------|------|------|-------|---------------------------------------------------------------------------------------------------------------------------|-------|
| A_24_P250666 | -2.6 | 1.9  | -1.4 | -1.9 | SFTPC | Homo sapiens surfactant protein C (SFTPC), transcript variant 1, mRNA [NM_003018]                                         | 6440  |
| A_24_P394420 | 1.1  | -2.6 | -1.1 | -1.0 | SFXN1 | Homo sapiens sideroflexin 1 (SFXN1), mRNA [NM_022754]                                                                     | 94081 |
| A_23_P202138 | 15.6 | 29.5 | 21.7 | 8.0  | SFXN3 | Homo sapiens sideroflexin 3 (SFXN3), mRNA [NM_030971]                                                                     | 81855 |
| A_23_P136254 | -4.6 | -2.6 | 1.1  | -1.6 | SGCD  | Homo sapiens sarcoglycan, delta (35kDa dystrophin-associated glycoprotein) (SGCD), transcript variant 2, mRNA [NM_172244] | 6444  |

|              |      |      |      |      |       |                                                                                                     |        |
|--------------|------|------|------|------|-------|-----------------------------------------------------------------------------------------------------|--------|
| A_23_P373584 | 1.1  | -1.2 | -3.2 | -1.1 | SGCZ  | Homo sapiens sarcoglycan, zeta (SGCZ), mRNA [NM_139167]                                             | 137868 |
| A_23_P62881  | -1.5 | -1.5 | -1.7 | -2.3 | SGIP1 | Homo sapiens SH3-domain GRB2-like (endophilin) interacting protein 1 (SGIP1), mRNA [NM_032291]      | 84251  |
| A_24_P333857 | -5.0 | -1.5 | -7.8 | 1.0  | SGIP1 | Homo sapiens SH3-domain GRB2-like (endophilin) interacting protein 1 (SGIP1), mRNA [NM_032291]      | 84251  |
| A_23_P131801 | -1.8 | -1.1 | -2.5 | 1.3  | SGK2  | Homo sapiens serum/glucocorticoid regulated kinase 2 (SGK2), transcript variant 1, mRNA [NM_170693] | 10110  |

|              |      |      |      |      |        |                                                                                                                    |        |
|--------------|------|------|------|------|--------|--------------------------------------------------------------------------------------------------------------------|--------|
| A_23_P250212 | 1.0  | -1.3 | -1.6 | -2.3 | SGK223 | Homo sapiens homolog of rat pragma of Rnd2 (SGK223), mRNA [NM_001080826]                                           | 157285 |
| A_24_P46953  | -2.5 | 1.5  | 1.5  | 2.4  | SGK3   | Homo sapiens serum/glucocorticoid regulated kinase family, member 3 (SGK3), transcript variant 1, mRNA [NM_013257] | 23678  |
| A_23_P326204 | 3.4  | 5.5  | 1.7  | 2.6  | SGMS2  | Homo sapiens sphingomyelin synthase 2 (SGMS2), transcript variant 1, mRNA [NM_152621]                              | 166929 |
| A_23_P29723  | 1.0  | -1.1 | -3.1 | -1.0 | SGOL1  | Homo sapiens shugoshin-like 1 (S. pombe) (SGOL1), transcript variant A2, mRNA [NM_001012410]                       | 151648 |



|              |      |      |      |       |       |                                                                               |       |
|--------------|------|------|------|-------|-------|-------------------------------------------------------------------------------|-------|
| A_24_P940815 | 1.0  | -1.0 | -3.1 | -1.1  | SGPL1 | Homo sapiens sphingosin e-1-phosphate lyase 1 (SGPL1), mRNA [NM_003901]       | 8879  |
| A_23_P347048 | -2.5 | -1.3 | -3.2 | -1.1  | SGPP1 | Homo sapiens sphingosin e-1-phosphate phosphatase 1 (SGPP1), mRNA [NM_030791] | 81537 |
| A_23_P254254 | 1.3  | -1.1 | 1.5  | -27.7 | SGSH  | Homo sapiens N-sulfoglucosamine sulfohydrolase (SGSH), mRNA [NM_000199]       | 6448  |
| A_23_P166491 | -5.0 | 2.0  | 1.7  | 1.3   | SGSM3 | Homo sapiens small G protein signaling modulator 3 (SGSM3), mRNA [NM_015705]  | 27352 |

|              |     |      |      |      |      |                                                                                                              |       |
|--------------|-----|------|------|------|------|--------------------------------------------------------------------------------------------------------------|-------|
| A_23_P108331 | 2.1 | 2.4  | 2.0  | -1.6 | SGTA | Homo sapiens small glutamine-rich tetratricopeptide repeat (TPR)-containing , alpha (SGTA), mRNA [NM_003021] | 6449  |
| A_24_P399585 | 5.0 | -3.3 | 1.0  | 3.1  | SGTA | Homo sapiens small glutamine-rich tetratricopeptide repeat (TPR)-containing , alpha (SGTA), mRNA [NM_003021] | 6449  |
| A_23_P7376   | 1.0 | 1.0  | -1.0 | -5.4 | SGTB | Homo sapiens small glutamine-rich tetratricopeptide repeat (TPR)-containing , beta (SGTB), mRNA [NM_019072]  | 54557 |

|              |      |      |      |      |        |                                                                                     |        |
|--------------|------|------|------|------|--------|-------------------------------------------------------------------------------------|--------|
| A_24_P185029 | 1.2  | 2.2  | 1.2  | 2.6  | SH2B1  | Homo sapiens SH2B adaptor protein 1 (SH2B1), transcript variant 2, mRNA [NM_015503] | 25970  |
| A_23_P59507  | 2.9  | 2.4  | 1.2  | 1.2  | SH2B2  | Homo sapiens SH2B adaptor protein 2 (SH2B2), mRNA [NM_020979]                       | 10603  |
| A_23_P13946  | -6.2 | 1.0  | 1.1  | -1.8 | SH2B3  | Homo sapiens SH2B adaptor protein 3 (SH2B3), mRNA [NM_005475]                       | 10019  |
| A_23_P351148 | -1.7 | -1.8 | -2.0 | -1.9 | SH2D1B | Homo sapiens SH2 domain containing 1B (SH2D1B), mRNA [NM_053282]                    | 117157 |

|              |     |     |      |      |        |                                                                                        |        |
|--------------|-----|-----|------|------|--------|----------------------------------------------------------------------------------------|--------|
| A_23_P160618 | 3.2 | 2.1 | -1.1 | 5.0  | SH2D2A | Homo sapiens SH2 domain containing 2A (SH2D2A), transcript variant 2, mRNA [NM_003975] | 9047   |
| A_24_P262728 | 1.4 | 6.5 | -1.2 | -1.2 | SH2D3A | Homo sapiens SH2 domain containing 3A (SH2D3A), mRNA [NM_005490]                       | 10045  |
| A_23_P169003 | 2.4 | 1.7 | 1.6  | 1.1  | SH2D4A | Homo sapiens SH2 domain containing 4A (SH2D4A), transcript variant 1, mRNA [NM_022071] | 63898  |
| A_24_P417904 | 1.0 | 1.0 | -2.0 | -1.0 | SH2D4B | Homo sapiens SH2 domain containing 4B (SH2D4B), transcript variant 1, mRNA [NM_207372] | 387694 |

|              |      |      |      |      |        |                                                                                                             |        |
|--------------|------|------|------|------|--------|-------------------------------------------------------------------------------------------------------------|--------|
| A_24_P686965 | -1.1 | -2.3 | -2.3 | -1.2 | SH2D5  | Homo sapiens SH2 domain containing 5 (SH2D5), transcript variant 1, mRNA [NM_001103161]                     | 400745 |
| A_24_P573089 | 1.1  | -1.0 | -2.7 | -4.1 | SH2D5  | Homo sapiens SH2 domain containing 5 (SH2D5), transcript variant 1, mRNA [NM_001103161]                     | 400745 |
| A_23_P91520  | 2.4  | -1.6 | 1.0  | -1.0 | SH3BGR | Homo sapiens SH3 domain binding glutamic acid-rich protein (SH3BGR), transcript variant 1, mRNA [NM_007341] | 6450   |

|              |      |      |      |      |          |                                                                                                |       |
|--------------|------|------|------|------|----------|------------------------------------------------------------------------------------------------|-------|
| A_24_P209171 | -1.1 | -2.0 | -5.8 | -1.3 | SH3BGRL2 | Homo sapiens SH3 domain binding glutamic acid-rich protein like 2 (SH3BGRL2), mRNA [NM_031469] | 83699 |
| A_24_P226322 | 1.1  | 1.4  | -1.0 | -4.3 | SH3BGRL2 | Homo sapiens SH3 domain binding glutamic acid-rich protein like 2 (SH3BGRL2), mRNA [NM_031469] | 83699 |
| A_23_P126388 | -1.5 | -3.0 | 1.2  | -1.3 | SH3BGRL3 | Homo sapiens SH3 domain binding glutamic acid-rich protein like 3 (SH3BGRL3), mRNA [NM_031286] | 83442 |

|              |      |      |      |       |        |                                                                                                             |       |
|--------------|------|------|------|-------|--------|-------------------------------------------------------------------------------------------------------------|-------|
| A_23_P110116 | -1.1 | -1.0 | -1.3 | -10.7 | SH3BP2 | Homo sapiens SH3-domain binding protein 2 (SH3BP2), transcript variant 1, mRNA [NM_003023]                  | 6452  |
| A_24_P148750 | 1.4  | 1.3  | 1.7  | -3.1  | SH3BP5 | Homo sapiens SH3-domain binding protein 5 (BTK-associated) (SH3BP5), transcript variant 1, mRNA [NM_004844] | 9467  |
| A_23_P363    | 1.1  | -1.2 | 1.3  | 2.1   | SH3D21 | Homo sapiens SH3 domain containing 21 (SH3D21), transcript variant 2, mRNA [NM_024676]                      | 79729 |

|              |      |      |      |      |          |                                                                                                       |       |
|--------------|------|------|------|------|----------|-------------------------------------------------------------------------------------------------------|-------|
| A_24_P139094 | -1.0 | 1.0  | 1.6  | -3.3 | SH3GL1   | Homo sapiens SH3-domain GRB2-like 1 (SH3GL1), transcript variant 1, mRNA [NM_003025]                  | 6455  |
| A_24_P386334 | -1.5 | -1.4 | -1.6 | -2.1 | SH3GLB2  | Homo sapiens SH3-domain GRB2-like endophilin B2 (SH3GLB2), mRNA [NM_020145]                           | 56904 |
| A_24_P289139 | 1.3  | -3.6 | -2.0 | -1.1 | SH3KBP1  | Homo sapiens SH3-domain kinase binding protein 1 (SH3KBP1), transcript variant 2, mRNA [NM_001024666] | 30011 |
| A_23_P35456  | 1.5  | 1.6  | 1.3  | 2.7  | SH3PXD2A | Homo sapiens SH3 and PX domains 2A (SH3PXD2A), mRNA [NM_014631]                                       | 9644  |



|              |      |      |      |      |        |                                                                                                                               |        |
|--------------|------|------|------|------|--------|-------------------------------------------------------------------------------------------------------------------------------|--------|
| A_24_P589266 | 1.1  | 1.1  | 1.3  | -2.3 | SH3RF3 | Homo sapiens SH3 domain containing ring finger 3 (SH3RF3), mRNA [NM_001099289]                                                | 344558 |
| A_23_P7473   | 1.0  | 1.4  | -1.0 | -3.8 | SH3TC2 | Homo sapiens SH3 domain and tetratricopeptide repeats 2 (SH3TC2), mRNA [NM_024577]                                            | 79628  |
| A_24_P922367 | -1.0 | -4.7 | -1.1 | 1.0  | SH3YL1 | Homo sapiens SH3 domain containing , Ysc84-like 1 (S. cerevisiae) , mRNA (cDNA clone IMAGE:4825726), complete cds. [BC030778] | 26751  |

|              |      |      |      |      |        |                                                                                                         |       |
|--------------|------|------|------|------|--------|---------------------------------------------------------------------------------------------------------|-------|
| A_23_P334883 | 2.2  | 1.9  | 2.2  | 2.1  | SHANK2 | Homo sapiens SH3 and multiple ankyrin repeat domains 2 (SHANK2), transcript variant 1, mRNA [NM_012309] | 22941 |
| A_24_P194881 | 1.7  | -7.4 | 1.9  | -1.1 | SHANK3 | Homo sapiens SH3 and multiple ankyrin repeat domains 3 (SHANK3), mRNA [NM_001080420]                    | 85358 |
| A_23_P257743 | 1.4  | 2.3  | -1.1 | 3.8  | SHB    | Homo sapiens Src homology 2 domain containing adaptor protein B (SHB), mRNA [NM_003028]                 | 6461  |
| A_24_P146575 | -4.0 | -1.4 | -2.4 | 1.3  | SHB    | Homo sapiens Src homology 2 domain containing adaptor protein B (SHB), mRNA [NM_003028]                 | 6461  |

|              |      |     |     |     |      |                                                                                                                            |       |
|--------------|------|-----|-----|-----|------|----------------------------------------------------------------------------------------------------------------------------|-------|
| A_23_P207089 | -5.5 | 1.0 | 1.0 | 1.1 | SHBG | Homo sapiens sex hormone-binding globulin (SHBG), transcript variant 1, mRNA [NM_001040]                                   | 6462  |
| A_24_P68585  | -2.1 | 1.8 | 1.8 | 1.2 | SHC1 | Homo sapiens SHC (Src homology 2 domain containing ) transforming protein 1 (SHC1), transcript variant 1, mRNA [NM_183001] | 6464  |
| A_32_P176036 | 4.6  | 9.3 | 6.9 | 3.4 | SHC3 | Homo sapiens SHC (Src homology 2 domain containing ) transforming protein 3 (SHC3), mRNA [NM_016848]                       | 53358 |

|              |     |      |      |       |         |                                                                                                |        |
|--------------|-----|------|------|-------|---------|------------------------------------------------------------------------------------------------|--------|
| A_24_P350223 | 1.8 | -4.6 | 1.9  | 1.4   | SHC4    | Homo sapiens SHC (Src homology 2 domain containing ) family, member 4 (SHC4), mRNA [NM_203349] | 399694 |
| A_23_P136571 | 2.5 | -2.0 | 1.1  | -1.7  | SHCBP1L | Homo sapiens SHC SH2-domain binding protein 1-like (SHCBP1L), mRNA [NM_030933]                 | 81626  |
| A_23_P142255 | 2.3 | 2.4  | -1.6 | -31.5 | SHD     | Homo sapiens Src homology 2 domain containing transforming protein D (SHD), mRNA [NM_020209]   | 56961  |
| A_23_P400716 | 1.0 | -1.0 | -2.2 | -1.1  | SHE     | Homo sapiens Src homology 2 domain containing E (SHE), mRNA [NM_001010846]                     | 126669 |

|              |      |      |      |      |       |                                                                                                                               |        |
|--------------|------|------|------|------|-------|-------------------------------------------------------------------------------------------------------------------------------|--------|
| A_24_P794275 | 1.0  | 1.0  | 2.1  | 1.0  | SHE   | Src<br>homology<br>2 domain<br>containing<br>E<br>[Source:H<br>GNC<br>Symbol;Ac<br>c:27004]<br>[ENST0000<br>0486773]          | 126669 |
| A_32_P183904 | 1.0  | -2.5 | -1.0 | 1.1  | SHF   | Homo<br>sapiens<br>Src<br>homology<br>2 domain<br>containing<br>F (SHF),<br>mRNA<br>[NM_1383<br>56]                           | 90525  |
| A_24_P101314 | -1.0 | -1.2 | -4.2 | -2.4 | SHF   | Homo<br>sapiens<br>cDNA<br>FLJ41664<br>fis, clone<br>FEBRA202<br>7352.<br>[AK123658<br>]                                      | 90525  |
| A_23_P42664  | 1.0  | -3.6 | 1.1  | 1.0  | SHFM1 | Homo<br>sapiens<br>split<br>hand/foot<br>malformat<br>ion<br>(ectrodact<br>yly) type 1<br>(SHFM1),<br>mRNA<br>[NM_0063<br>04] | 7979   |

|              |      |      |      |      |        |                                                                             |        |
|--------------|------|------|------|------|--------|-----------------------------------------------------------------------------|--------|
| A_32_P55241  | 1.0  | -1.0 | -5.6 | -1.1 | SHISA2 | Homo sapiens shisa homolog 2 (Xenopus laevis) (SHISA2), mRNA [NM_001007538] | 387914 |
| A_24_P46159  | -1.8 | -2.8 | -3.8 | -1.8 | SHISA5 | Homo sapiens shisa homolog 5 (Xenopus laevis) (SHISA5), mRNA [NM_016479]    | 51246  |
| A_24_P161581 | -1.2 | -2.1 | -4.0 | -1.5 | SHISA7 | Homo sapiens shisa homolog 7 (Xenopus laevis) (SHISA7), mRNA [NM_001145176] | 729956 |
| A_23_P390443 | 1.1  | -2.8 | 1.8  | 1.1  | SHISA7 | Homo sapiens shisa homolog 7 (Xenopus laevis) (SHISA7), mRNA [NM_001145176] | 729956 |

|              |     |     |      |      |        |                                                                                                   |        |
|--------------|-----|-----|------|------|--------|---------------------------------------------------------------------------------------------------|--------|
| A_23_P310492 | 3.6 | 2.6 | 3.5  | 2.3  | SHISA7 | Homo sapiens shisa homolog 7 (Xenopus laevis) (SHISA7), mRNA [NM_001145176]                       | 729956 |
| A_32_P213091 | 1.1 | 1.0 | -2.5 | -1.1 | SHISA9 | Homo sapiens shisa homolog 9 (Xenopus laevis) (SHISA9), transcript variant 2, mRNA [NM_001145205] | 729993 |
| A_24_P160868 | 1.0 | 5.2 | 1.7  | -2.0 | SHISA9 | Homo sapiens shisa homolog 9 (Xenopus laevis) (SHISA9), transcript variant 2, mRNA [NM_001145205] | 729993 |

|              |      |     |      |      |        |                                                                                                                                                       |        |
|--------------|------|-----|------|------|--------|-------------------------------------------------------------------------------------------------------------------------------------------------------|--------|
| A_32_P115515 | -1.6 | 1.4 | -4.0 | -3.7 | SHISA9 | Homo sapiens shisa homolog 9 (Xenopus laevis) (SHISA9), transcript variant 1, mRNA [NM_001145204]                                                     | 729993 |
| A_24_P919876 | 1.3  | 2.6 | 2.6  | 2.8  | SHMT1  | Homo sapiens mRNA for putative 14kD protein containing SHMT homology, clone pUS1215. [Y14488]                                                         | 6470   |
| A_24_P205364 | 2.1  | 1.9 | 2.1  | 1.6  | SHMT1  | Homo sapiens serine hydroxymethyltransferase 1 (soluble) (SHMT1), nuclear gene encoding mitochondrial protein, transcript variant 1, mRNA [NM_004169] | 6470   |



|              |     |      |      |      |       |                                                                                                                                                             |      |
|--------------|-----|------|------|------|-------|-------------------------------------------------------------------------------------------------------------------------------------------------------------|------|
| A_23_P169629 | 1.0 | 2.1  | 1.2  | -1.8 | SHMT2 | Homo sapiens serine hydroxymethyltransferase 2 (mitochondrial) (SHMT2), nuclear gene encoding mitochondrial protein, transcript variant 1, mRNA [NM_005412] | 6472 |
| A_23_P22761  | 1.1 | 1.0  | -2.1 | 1.0  | SHOX  | Homo sapiens short stature homeobox (SHOX), transcript variant 2, mRNA [NM_006883]                                                                          | 6473 |
| A_23_P217698 | 2.6 | -1.9 | -2.9 | 1.2  | SHOX  | Human pseudoautosomal homeodomain-containing protein (PHOG) mRNA, complete cds. [U89331]                                                                    | 6473 |

|              |      |     |      |      |         |                                                                                          |        |
|--------------|------|-----|------|------|---------|------------------------------------------------------------------------------------------|--------|
| A_23_P124384 | 1.2  | 2.0 | -1.8 | 2.0  | SHOX2   | Homo sapiens short stature homeobox 2 (SHOX2), transcript variant 2, mRNA [NM_006884]    | 6474   |
| A_24_P8200   | 6.3  | 6.1 | 6.1  | 6.5  | SHPRH   | SNF2 histone linker PHD RING helicase [Source:HGNC Symbol;Acc:19336] [ENST00000433355]   | 257218 |
| A_23_P113441 | 5.8  | 1.9 | 1.9  | 1.9  | SHQ1    | Homo sapiens SHQ1 homolog (S. cerevisiae) (SHQ1), mRNA [NM_018130]                       | 55164  |
| A_23_P404902 | -2.3 | 1.1 | -1.0 | -1.0 | SHROOM1 | Homo sapiens shroom family member 1 (SHROOM1), transcript variant 1, mRNA [NM_001172700] | 134549 |

|              |       |      |      |      |         |                                                                                                       |        |
|--------------|-------|------|------|------|---------|-------------------------------------------------------------------------------------------------------|--------|
| A_23_P156185 | -5.7  | -1.1 | -1.6 | -2.4 | SHROOM1 | Homo sapiens shroom family member 1 (SHROOM 1), transcript variant 2, mRNA [NM_133456]                | 134549 |
| A_24_P265064 | -1.7  | -1.9 | -1.4 | -4.9 | SHROOM4 | Homo sapiens shroom family member 4 (SHROOM 4), transcript variant 1, mRNA [NM_020717]                | 57477  |
| A_32_P302205 | -12.8 | -2.0 | -1.6 | -1.5 | SI      | Homo sapiens sucrase-isomaltase (alpha-glucosidase) (SI), mRNA [NM_001041]                            | 6476   |
| A_23_P106798 | -3.9  | 2.3  | -2.6 | 2.2  | SIAH1   | Homo sapiens seven in absentia homolog 1 (Drosophila) (SIAH1), transcript variant 1, mRNA [NM_003031] | 6477   |

|              |     |      |      |      |       |                                                                                 |       |
|--------------|-----|------|------|------|-------|---------------------------------------------------------------------------------|-------|
| A_23_P69121  | 1.9 | -1.6 | 3.4  | 1.2  | SIAH2 | Homo sapiens seven in absentia homolog 2 (Drosophila) (SIAH2), mRNA [NM_005067] | 6478  |
| A_23_P132515 | 2.2 | 1.1  | -1.0 | -1.0 | SIDT1 | Homo sapiens SID1 transmembrane family, member 1 (SIDT1), mRNA [NM_017699]      | 54847 |
| A_23_P98402  | 1.1 | 1.1  | 2.6  | 1.0  | SIDT2 | Homo sapiens SID1 transmembrane family, member 2 (SIDT2), mRNA [NM_001040455]   | 51092 |

|              |      |      |      |      |          |                                                                                                                                  |       |
|--------------|------|------|------|------|----------|----------------------------------------------------------------------------------------------------------------------------------|-------|
| A_23_P84344  | 2.1  | 3.1  | -1.1 | 2.2  | SIGIRR   | Homo sapiens single immunoglobulin and toll-interleukin 1 receptor (TIR) domain (SIGIRR), transcript variant 3, mRNA [NM_021805] | 59307 |
| A_23_P301962 | 2.8  | 1.6  | 1.5  | 1.5  | SIGLEC1  | Homo sapiens sialic acid binding Ig-like lectin 1, sialoadhesin (SIGLEC1), mRNA [NM_023068]                                      | 6614  |
| A_23_P208182 | -1.0 | -4.2 | -1.2 | -1.1 | SIGLEC10 | Homo sapiens sialic acid binding Ig-like lectin 10 (SIGLEC10), transcript variant 1, mRNA [NM_033130]                            | 89790 |

|              |     |      |      |     |          |                                                                                                       |        |
|--------------|-----|------|------|-----|----------|-------------------------------------------------------------------------------------------------------|--------|
| A_24_P339560 | 3.0 | -2.5 | 2.8  | 2.6 | SIGLEC11 | Homo sapiens sialic acid binding Ig-like lectin 11 (SIGLEC11), transcript variant 1, mRNA [NM_052884] | 114132 |
| A_23_P50146  | 3.1 | 1.9  | 3.1  | 2.6 | SIGLEC15 | Homo sapiens sialic acid binding Ig-like lectin 15 (SIGLEC15), mRNA [NM_213602]                       | 284266 |
| A_24_P125561 | 1.3 | 1.2  | -2.6 | 1.1 | SIGLEC9  | Homo sapiens sialic acid binding Ig-like lectin 9 (SIGLEC9), transcript variant 2, mRNA [NM_014441]   | 27180  |
| A_24_P347067 | 3.8 | 4.0  | 2.0  | 2.0 | SIK3     | Homo sapiens SIK family kinase 3 (SIK3), mRNA [NM_025164]                                             | 23387  |

|              |      |      |      |      |         |                                                                                                                              |       |
|--------------|------|------|------|------|---------|------------------------------------------------------------------------------------------------------------------------------|-------|
| A_23_P85990  | 1.4  | 2.4  | 1.3  | 1.0  | SIKE1   | Homo sapiens suppressor of IKBKE1 (SIKE1), transcript variant 2, mRNA [NM_025073]                                            | 80143 |
| A_24_P937855 | 1.0  | -1.0 | -3.1 | -2.7 | SIKE1   | Homo sapiens suppressor of IKBKE1 (SIKE1), transcript variant 1, mRNA [NM_001102396]                                         | 80143 |
| A_23_P252903 | -1.1 | -1.3 | -1.3 | -5.0 | SIL1    | Homo sapiens SIL1 homolog, endoplasmic reticulum chaperone (S. cerevisiae) (SIL1), transcript variant 1, mRNA [NM_001037633] | 64374 |
| A_24_P344053 | 1.0  | -3.3 | 1.0  | 1.0  | SIPA1L1 | Homo sapiens signal-induced proliferation-associated 1 like 1 (SIPA1L1), mRNA [NM_015556]                                    | 26037 |

|              |      |      |      |      |         |                                                                                                   |        |
|--------------|------|------|------|------|---------|---------------------------------------------------------------------------------------------------|--------|
| A_24_P24343  | 1.3  | 1.2  | -2.9 | 1.4  | SIPA1L3 | Homo sapiens signal-induced proliferation-associated 1 like 3 (SIPA1L3), mRNA [NM_015073]         | 23094  |
| A_24_P259083 | 1.5  | -1.2 | -2.6 | -1.1 | SIRPA   | Homo sapiens signal-regulatory protein alpha (SIRPA), transcript variant 1, mRNA [NM_001040022]   | 140885 |
| A_23_P17456  | -2.7 | -2.0 | -5.5 | -1.9 | SIRPB1  | Homo sapiens signal-regulatory protein beta 1 (SIRPB1), transcript variant 1, mRNA [NM_006065]    | 10326  |
| A_24_P202840 | 2.1  | 2.1  | 3.9  | -1.2 | SIRPB2  | Homo sapiens signal-regulatory protein beta 2 (SIRPB2), transcript variant 1, mRNA [NM_001122962] | 284759 |



|              |      |      |      |      |       |                                                                                                                     |        |
|--------------|------|------|------|------|-------|---------------------------------------------------------------------------------------------------------------------|--------|
| A_23_P406521 | 12.4 | 8.3  | 3.2  | 3.9  | SIRPD | Homo sapiens signal-regulatory protein delta (SIRPD), mRNA [NM_178460]                                              | 128646 |
| A_23_P142455 | 2.4  | -2.2 | 1.7  | -1.1 | SIRT2 | Homo sapiens sirtuin 2 (SIRT2), transcript variant 1, mRNA [NM_012237]                                              | 22933  |
| A_23_P139265 | -5.7 | 1.7  | -3.9 | -1.8 | SIRT3 | Homo sapiens sirtuin 3 (SIRT3), nuclear gene encoding mitochondrial protein, transcript variant 1, mRNA [NM_012239] | 23410  |

|              |      |      |     |      |       |                                                                                                                     |       |
|--------------|------|------|-----|------|-------|---------------------------------------------------------------------------------------------------------------------|-------|
| A_24_P923684 | -1.5 | 6.4  | 3.4 | 6.6  | SIRT3 | Homo sapiens sirtuin 3 (SIRT3), nuclear gene encoding mitochondrial protein, transcript variant 1, mRNA [NM_012239] | 23410 |
| A_23_P99226  | 1.3  | 1.2  | 1.1 | -4.1 | SIRT4 | Homo sapiens sirtuin 4 (SIRT4), mRNA [NM_012240]                                                                    | 23409 |
| A_23_P208847 | 2.3  | 1.9  | 1.7 | -1.2 | SIRT6 | Homo sapiens sirtuin 6 (SIRT6), transcript variant 1, mRNA [NM_016539]                                              | 51548 |
| A_23_P66813  | 2.6  | 1.6  | 1.9 | 1.5  | SIRT7 | Homo sapiens sirtuin 7 (SIRT7), mRNA [NM_016538]                                                                    | 51547 |
| A_23_P28120  | -2.4 | -1.1 | 1.9 | -1.2 | SIX2  | Homo sapiens SIX homeobox 2 (SIX2), mRNA [NM_016932]                                                                | 10736 |

|              |      |      |      |      |      |                                                                                                                     |        |
|--------------|------|------|------|------|------|---------------------------------------------------------------------------------------------------------------------|--------|
| A_23_P326885 | -2.0 | -1.8 | -4.0 | -2.9 | SIX4 | Homo sapiens SIX homeobox 4 (SIX4), mRNA [NM_017420]                                                                | 51804  |
| A_32_P55860  | -1.2 | -1.2 | -1.3 | -8.9 | SKA2 | Homo sapiens spindle and kinetochore associated complex subunit 2 (SKA2), transcript variant 1, mRNA [NM_182620]    | 348235 |
| A_23_P340909 | 1.1  | 1.2  | 1.1  | -4.3 | SKA3 | Homo sapiens chromosome 13 open reading frame 3, mRNA (cDNA clone MGC:4832 IMAGE:3604003), complete cds. [BC013418] | 221150 |

|              |      |      |      |      |        |                                                                                                     |        |
|--------------|------|------|------|------|--------|-----------------------------------------------------------------------------------------------------|--------|
| A_23_P100730 | -1.1 | -1.1 | -3.1 | -1.1 | SKAP1  | Homo sapiens src kinase associated phosphoprotein 1 (SKAP1), transcript variant 1, mRNA [NM_003726] | 8631   |
| A_32_P63086  | 1.1  | 1.1  | 1.0  | -4.6 | SKIL   | Homo sapiens SKI-like oncogene (SKIL), transcript variant 1, mRNA [NM_005414]                       | 6498   |
| A_23_P168080 | 2.2  | 1.6  | 2.1  | 1.2  | SKIV2L | Homo sapiens superkiller viralicidic activity 2-like (S. cerevisiae) (SKIV2L), mRNA [NM_006929]     | 6499   |
| A_23_P348146 | -3.3 | -3.8 | -1.0 | -1.0 | SLAIN1 | Homo sapiens SLAIN motif family, member 1 (SLAIN1), transcript variant 1, mRNA [NM_001040153]       | 122060 |

|              |      |      |      |     |         |                                                                                                                                           |       |
|--------------|------|------|------|-----|---------|-------------------------------------------------------------------------------------------------------------------------------------------|-------|
| A_32_P808    | -1.0 | -9.9 | -1.0 | 1.3 | SLAIN2  | Homo sapiens SLAIN motif family, member 2 (SLAIN2), mRNA [NM_020846]                                                                      | 57606 |
| A_23_P366254 | -1.0 | 2.3  | 2.1  | 1.0 | SLC10A3 | Homo sapiens solute carrier family 10 (sodium/bile acid cotransporter family), member 3 (SLC10A3), transcript variant 1, mRNA [NM_019848] | 8273  |
| A_23_P39665  | 4.4  | 6.1  | 6.9  | 4.3 | SLC11A1 | Homo sapiens solute carrier family 11 (proton-coupled divalent metal ion transporters), member 1 (SLC11A1), mRNA [NM_000578]              | 6556  |

|              |      |      |      |       |         |                                                                                                                                                       |      |
|--------------|------|------|------|-------|---------|-------------------------------------------------------------------------------------------------------------------------------------------------------|------|
| A_24_P76831  | -1.2 | -1.3 | -1.3 | -12.0 | SLC11A1 | Homo sapiens solute carrier family 11 (proton-coupled divalent metal ion transporters), member 1 (SLC11A1), mRNA [NM_000578]                          | 6556 |
| A_24_P913210 | -4.9 | -2.7 | -3.2 | -5.5  | SLC11A2 | Homo sapiens solute carrier family 11 (proton-coupled divalent metal ion transporters), member 2 (SLC11A2), transcript variant 2, mRNA [NM_001174126] | 4891 |

|             |      |      |      |      |         |                                                                                                                                            |      |
|-------------|------|------|------|------|---------|--------------------------------------------------------------------------------------------------------------------------------------------|------|
| A_23_P99879 | -1.0 | 1.2  | -1.1 | -2.2 | SLC12A1 | Homo sapiens solute carrier family 12 (sodium/potassium/chloride transporters), member 1 (SLC12A1), transcript variant 1, mRNA [NM_000338] | 6557 |
| A_23_P77653 | -1.0 | -2.2 | -1.1 | 1.5  | SLC12A3 | Homo sapiens solute carrier family 12 (sodium/chloride transporters), member 3 (SLC12A3), transcript variant 1, mRNA [NM_000339]           | 6559 |

|              |      |      |      |      |         |                                                                                                               |       |
|--------------|------|------|------|------|---------|---------------------------------------------------------------------------------------------------------------|-------|
| A_23_P61688  | 1.3  | -2.1 | 1.1  | 1.2  | SLC12A7 | Homo sapiens solute carrier family 12 (potassium/chloride transporters), member 7 (SLC12A7), mRNA [NM_006598] | 10723 |
| A_23_P215233 | 2.1  | 1.7  | 1.6  | 1.5  | SLC12A9 | Homo sapiens solute carrier family 12 (potassium/chloride transporters), member 9 (SLC12A9), mRNA [NM_020246] | 56996 |
| A_23_P71226  | -7.6 | -1.4 | -2.1 | -3.4 | SLC13A1 | Homo sapiens solute carrier family 13 (sodium/sulfate symporters), member 1 (SLC13A1), mRNA [NM_022444]       | 6561  |



|              |      |      |      |      |         |                                                                                                                                                |       |
|--------------|------|------|------|------|---------|------------------------------------------------------------------------------------------------------------------------------------------------|-------|
| A_24_P355057 | -1.0 | -9.0 | -3.0 | -1.1 | SLC13A1 | Homo sapiens solute carrier family 13 (sodium/sulfate symporters), member 1 (SLC13A1), mRNA [NM_022444]                                        | 6561  |
| A_23_P107307 | -2.7 | 1.1  | -1.4 | -3.3 | SLC13A2 | Homo sapiens solute carrier family 13 (sodium-dependent dicarboxylate transporter), member 2 (SLC13A2), transcript variant 2, mRNA [NM_003984] | 9058  |
| A_23_P19778  | 1.0  | 1.0  | -4.4 | 1.7  | SLC13A4 | Homo sapiens solute carrier family 13 (sodium/sulfate symporters), member 4 (SLC13A4), mRNA [NM_012450]                                        | 26266 |

|              |      |      |      |      |         |                                                                                                                                            |      |
|--------------|------|------|------|------|---------|--------------------------------------------------------------------------------------------------------------------------------------------|------|
| A_23_P38757  | -2.7 | -4.3 | -4.1 | -4.9 | SLC14A1 | Human RACH1 (RACH1) mRNA, complete cds. [U35735]                                                                                           | 6563 |
| A_24_P926507 | 1.1  | -1.0 | -2.1 | -2.8 | SLC14A1 | Homo sapiens solute carrier family 14 (urea transporter), member 1 (Kidd blood group) (SLC14A1), transcript variant 4, mRNA [NM_001146037] | 6563 |
| A_24_P136471 | 22.3 | 13.9 | 22.6 | 22.1 | SLC14A2 | solute carrier family 14 (urea transporter), member 2 [Source:HGNC Symbol;Acc:10919] [ENST00000323329]                                     | 8170 |

|              |      |      |      |      |         |                                                                                                                                       |      |
|--------------|------|------|------|------|---------|---------------------------------------------------------------------------------------------------------------------------------------|------|
| A_23_P128609 | -2.0 | -1.1 | -1.9 | -2.4 | SLC15A1 | Homo sapiens solute carrier family 15 (oligopeptide transporter), member 1 (SLC15A1), mRNA [NM_005073]                                | 6564 |
| A_24_P8165   | 1.1  | 1.1  | 3.8  | -1.1 | SLC15A1 | solute carrier family 15 (oligopeptide transporter), member 1 [Source:HGNC Symbol;Acc:10920] [ENST00000376494]                        | 6564 |
| A_23_P126825 | 1.4  | 3.2  | 1.3  | -1.0 | SLC16A1 | Homo sapiens solute carrier family 16, member 1 (monocarboxylic acid transporter 1) (SLC16A1), transcript variant 1, mRNA [NM_003051] | 6566 |

|              |      |     |      |      |          |                                                                                                                    |        |
|--------------|------|-----|------|------|----------|--------------------------------------------------------------------------------------------------------------------|--------|
| A_23_P363313 | 1.1  | 2.1 | -1.8 | -2.6 | SLC16A11 | Homo sapiens solute carrier family 16, member 11 (monocarboxylic acid transporter 11) (SLC16A11), mRNA [NM_153357] | 162515 |
| A_23_P118741 | -6.3 | 1.0 | -1.0 | -1.0 | SLC16A13 | Homo sapiens solute carrier family 16, member 13 (monocarboxylic acid transporter 13) (SLC16A13), mRNA [NM_201566] | 201232 |
| A_23_P131394 | -4.0 | 1.0 | -4.7 | 1.0  | SLC16A14 | Homo sapiens solute carrier family 16, member 14 (monocarboxylic acid transporter 14) (SLC16A14), mRNA [NM_152527] | 151473 |

|              |      |      |      |      |          |                                                                                                                    |        |
|--------------|------|------|------|------|----------|--------------------------------------------------------------------------------------------------------------------|--------|
| A_24_P342829 | -1.0 | -4.1 | -8.3 | -1.0 | SLC16A14 | Homo sapiens solute carrier family 16, member 14 (monocarboxylic acid transporter 14) (SLC16A14), mRNA [NM_152527] | 151473 |
| A_23_P137097 | 1.1  | 1.1  | 1.2  | 2.1  | SLC16A2  | Homo sapiens solute carrier family 16, member 2 (monocarboxylic acid transporter 8) (SLC16A2), mRNA [NM_006517]    | 6567   |
| A_23_P117059 | -1.0 | -2.8 | -1.1 | -1.1 | SLC16A7  | Homo sapiens solute carrier family 16, member 7 (monocarboxylic acid transporter 2) (SLC16A7), mRNA [NM_004731]    | 9194   |

|              |      |      |      |      |         |                                                                                                                 |        |
|--------------|------|------|------|------|---------|-----------------------------------------------------------------------------------------------------------------|--------|
| A_32_P130630 | -1.9 | -1.9 | -2.7 | -1.3 | SLC16A7 | Homo sapiens solute carrier family 16, member 7 (monocarboxylic acid transporter 2) (SLC16A7), mRNA [NM_004731] | 9194   |
| A_23_P115726 | 1.1  | 1.3  | 1.1  | -2.1 | SLC16A9 | Homo sapiens solute carrier family 16, member 9 (monocarboxylic acid transporter 9) (SLC16A9), mRNA [NM_194298] | 220963 |
| A_23_P357270 | -1.0 | -1.1 | 1.4  | -2.4 | SLC17A4 | Homo sapiens solute carrier family 17 (sodium phosphate), member 4 (SLC17A4), mRNA [NM_005495]                  | 10050  |

|              |      |      |      |      |         |                                                                                                                                  |       |
|--------------|------|------|------|------|---------|----------------------------------------------------------------------------------------------------------------------------------|-------|
| A_23_P78750  | -1.6 | -3.0 | -3.1 | -1.7 | SLC17A7 | Homo sapiens solute carrier family 17 (sodium-dependent inorganic phosphate cotransporter), member 7 (SLC17A7), mRNA [NM_020309] | 57030 |
| A_23_P210361 | 1.1  | 1.3  | -2.3 | -1.1 | SLC17A9 | Homo sapiens solute carrier family 17, member 9 (SLC17A9), mRNA [NM_022082]                                                      | 63910 |
| A_23_P52499  | -2.1 | 1.2  | -1.2 | -1.7 | SLC18A2 | Homo sapiens solute carrier family 18 (vesicular monoamine), member 2 (SLC18A2), mRNA [NM_003054]                                | 6571  |

|              |      |      |      |      |         |                                                                                                                                                 |       |
|--------------|------|------|------|------|---------|-------------------------------------------------------------------------------------------------------------------------------------------------|-------|
| A_23_P52362  | -2.9 | -1.6 | -1.6 | -1.7 | SLC18A3 | Homo sapiens solute carrier family 18 (vesicular acetylcholine), member 3 (SLC18A3), mRNA [NM_003055]                                           | 6572  |
| A_23_P39871  | -4.5 | 1.1  | 2.5  | -1.5 | SLC19A3 | Homo sapiens solute carrier family 19, member 3 (SLC19A3), mRNA [NM_025243]                                                                     | 80704 |
| A_24_P232252 | -3.3 | -1.1 | -1.0 | 1.4  | SLC1A1  | Homo sapiens solute carrier family 1 (neuronal/epithelial high affinity glutamate transporter, system Xag), member 1 (SLC1A1), mRNA [NM_004170] | 6505  |



|              |      |      |      |      |        |                                                                                                                                             |      |
|--------------|------|------|------|------|--------|---------------------------------------------------------------------------------------------------------------------------------------------|------|
|              |      |      |      |      |        | Homo sapiens solute carrier family 1 (glial high affinity glutamate transporter), member 2 (SLC1A2), transcript variant 1, mRNA [NM_004171] |      |
| A_24_P350759 | 1.1  | -2.1 | -1.0 | -1.9 | SLC1A2 |                                                                                                                                             | 6506 |
|              |      |      |      |      |        | Homo sapiens solute carrier family 1 (glial high affinity glutamate transporter), member 2 (SLC1A2), transcript variant 1, mRNA [NM_004171] |      |
| A_23_P162068 | -1.0 | -1.0 | -2.9 | -1.0 | SLC1A2 |                                                                                                                                             | 6506 |

|              |      |      |      |      |        |                                                                                                                                             |      |
|--------------|------|------|------|------|--------|---------------------------------------------------------------------------------------------------------------------------------------------|------|
| A_24_P286114 | -2.7 | -1.7 | -6.1 | -1.3 | SLC1A3 | Homo sapiens solute carrier family 1 (glial high affinity glutamate transporter), member 3 (SLC1A3), transcript variant 1, mRNA [NM_004172] | 6507 |
| A_23_P91151  | 1.6  | 1.1  | 2.3  | 1.7  | SLC1A4 | Homo sapiens solute carrier family 1 (glutamate/neutral amino acid transporter), member 4 (SLC1A4), transcript variant 1, mRNA [NM_003038]  | 6509 |

|              |     |      |     |      |        |                                                                                                                                            |      |
|--------------|-----|------|-----|------|--------|--------------------------------------------------------------------------------------------------------------------------------------------|------|
| A_24_P191312 | 1.0 | -1.0 | 9.8 | -1.1 | SLC1A4 | Homo sapiens solute carrier family 1 (glutamate/neutral amino acid transporter), member 4 (SLC1A4), transcript variant 1, mRNA [NM_003038] | 6509 |
| A_23_P55998  | 1.4 | 1.3  | 2.2 | 1.6  | SLC1A5 | Homo sapiens solute carrier family 1 (neutral amino acid transporter), member 5 (SLC1A5), transcript variant 1, mRNA [NM_005628]           | 6510 |

|              |     |      |      |      |          |                                                                                                     |      |
|--------------|-----|------|------|------|----------|-----------------------------------------------------------------------------------------------------|------|
| A_23_P325562 | 1.2 | 1.2  | -1.4 | -2.3 | SLC1A7   | Homo sapiens solute carrier family 1 (glutamate transporter), member 7 (SLC1A7), mRNA [NM_006671]   | 6512 |
| A_24_P103004 | 2.6 | -1.0 | -1.0 | -1.0 | SLC20A1  | Homo sapiens solute carrier family 20 (phosphate transporter), member 1 (SLC20A1), mRNA [NM_005415] | 6574 |
| A_23_P132730 | 2.2 | -2.6 | 2.4  | -2.3 | SLC22A14 | Homo sapiens solute carrier family 22, member 14 (SLC22A14), mRNA [NM_004803]                       | 9389 |

|              |      |      |      |      |          |                                                                                                                             |       |
|--------------|------|------|------|------|----------|-----------------------------------------------------------------------------------------------------------------------------|-------|
| A_23_P388900 | 5.6  | 5.6  | 7.0  | 4.6  | SLC22A15 | Homo sapiens solute carrier family 22, member 15 (SLC22A15), mRNA [NM_018420]                                               | 55356 |
| A_24_P919084 | 2.5  | 6.9  | 1.9  | 7.4  | SLC22A16 | solute carrier family 22 (organic cation/carnitine transporter), member 16 [Source:HGNC Symbol;Acc:20302] [ENST00000461487] | 85413 |
| A_24_P330385 | -1.7 | -1.2 | -1.8 | -2.7 | SLC22A17 | Homo sapiens solute carrier family 22, member 17 (SLC22A17), transcript variant 2, mRNA [NM_016609]                         | 51310 |

|              |     |      |      |      |            |                                                                                                                        |       |
|--------------|-----|------|------|------|------------|------------------------------------------------------------------------------------------------------------------------|-------|
| A_24_P372643 | 1.5 | 1.4  | 1.8  | 3.5  | SLC22A18AS | Homo sapiens solute carrier family 22 (organic cation transporter), member 18 antisense (SLC22A18AS), mRNA [NM_007105] | 5003  |
| A_24_P252223 | 1.3 | 18.3 | -1.9 | -1.3 | SLC22A23   | Homo sapiens solute carrier family 22, member 23 (SLC22A23), transcript variant 2, mRNA [NM_021945]                    | 63027 |
| A_24_P350228 | 1.8 | -1.4 | -2.2 | 1.0  | SLC22A23   | Homo sapiens solute carrier family 22, member 23 (SLC22A23), transcript variant 2, mRNA [NM_021945]                    | 63027 |

|              |      |      |      |      |          |                                                                                                                        |       |
|--------------|------|------|------|------|----------|------------------------------------------------------------------------------------------------------------------------|-------|
| A_23_P7882   | -1.0 | -2.6 | 2.7  | -1.0 | SLC22A23 | Homo sapiens solute carrier family 22, member 23 (SLC22A23), transcript variant 1, mRNA [NM_015482]                    | 63027 |
| A_23_P19733  | -1.1 | 1.6  | -1.3 | -2.2 | SLC22A3  | Homo sapiens solute carrier family 22 (extraneuronal monoamine transporter), member 3 (SLC22A3), mRNA [NM_021977]      | 6581  |
| A_23_P156180 | -2.3 | -1.0 | 1.1  | -2.3 | SLC22A4  | Homo sapiens solute carrier family 22 (organic cation/ergothioneine transporter), member 4 (SLC22A4), mRNA [NM_003059] | 6583  |

|              |      |      |      |      |         |                                                                                                                               |        |
|--------------|------|------|------|------|---------|-------------------------------------------------------------------------------------------------------------------------------|--------|
| A_23_P93217  | 1.9  | -1.9 | 2.5  | -1.2 | SLC22A7 | Homo sapiens solute carrier family 22 (organic anion transporter), member 7 (SLC22A7), transcript variant 2, mRNA [NM_153320] | 10864  |
| A_24_P330021 | -1.9 | -1.8 | -2.0 | -2.1 | SLC22A9 | Homo sapiens solute carrier family 22 (organic anion transporter), member 9 (SLC22A9), mRNA [NM_080866]                       | 114571 |
| A_23_P6085   | 1.1  | 2.1  | 1.7  | 1.5  | SLC23A2 | Homo sapiens solute carrier family 23 (nucleobase transporters), member 2 (SLC23A2), transcript variant 2, mRNA [NM_203327]   | 9962   |



|              |      |      |      |      |         |                                                                                                                                        |       |
|--------------|------|------|------|------|---------|----------------------------------------------------------------------------------------------------------------------------------------|-------|
| A_23_P112173 | 1.0  | -1.0 | -9.0 | 1.0  | SLC24A2 | Homo sapiens solute carrier family 24 (sodium/potassium/calcium exchanger), member 2 (SLC24A2), transcript variant 1, mRNA [NM_020344] | 25769 |
| A_24_P67350  | -3.2 | 1.0  | -1.0 | -3.4 | SLC24A3 | Homo sapiens solute carrier family 24 (sodium/potassium/calcium exchanger), member 3 (SLC24A3), mRNA [NM_020689]                       | 57419 |

|              |     |     |     |     |         |                                                                                                                                                                                             |      |
|--------------|-----|-----|-----|-----|---------|---------------------------------------------------------------------------------------------------------------------------------------------------------------------------------------------|------|
| A_23_P120776 | 1.3 | 1.8 | 2.1 | 1.1 | SLC25A1 | Homo sapiens solute carrier family 25 (mitochondrial carrier; citrate transporter), member 1 (SLC25A1), nuclear gene encoding mitochondrial protein, transcript variant 1, mRNA [NM_005984] | 6576 |
|--------------|-----|-----|-----|-----|---------|---------------------------------------------------------------------------------------------------------------------------------------------------------------------------------------------|------|

|              |      |      |      |      |          |                                                                                                                                                                                                |       |
|--------------|------|------|------|------|----------|------------------------------------------------------------------------------------------------------------------------------------------------------------------------------------------------|-------|
| A_23_P38497  | 2.1  | 1.3  | 1.6  | -1.0 | SLC25A11 | Homo sapiens solute carrier family 25 (mitochondrial carrier; oxoglutarate carrier), member 11 (SLC25A11), nuclear gene encoding mitochondrial protein, transcript variant 1, mRNA [NM_003562] | 8402  |
| A_32_P157402 | -1.5 | -3.4 | -2.1 | -1.0 | SLC25A13 | Homo sapiens solute carrier family 25, member 13 (citrin) (SLC25A13), nuclear gene encoding mitochondrial protein, transcript variant 2, mRNA [NM_014251]                                      | 10165 |

|              |     |      |      |      |          |                                                                                                                                                                       |        |
|--------------|-----|------|------|------|----------|-----------------------------------------------------------------------------------------------------------------------------------------------------------------------|--------|
| A_32_P224522 | 1.0 | -1.0 | -1.1 | -2.2 | SLC25A23 | Homo sapiens solute carrier family 25 (mitochondrial carrier; phosphate carrier), member 23 (SLC25A23), nuclear gene encoding mitochondrial protein, mRNA [NM_024103] | 79085  |
| A_24_P368544 | 1.4 | 1.4  | -2.4 | 1.0  | SLC25A26 | Homo sapiens solute carrier family 25, member 26 (SLC25A26), nuclear gene encoding mitochondrial protein, transcript variant 1, mRNA [NM_173471]                      | 115286 |

|              |     |     |     |      |          |                                                                                                                                                  |        |
|--------------|-----|-----|-----|------|----------|--------------------------------------------------------------------------------------------------------------------------------------------------|--------|
| A_23_P169879 | 1.6 | 2.2 | 1.1 | -1.1 | SLC25A26 | Homo sapiens solute carrier family 25, member 26 (SLC25A26), nuclear gene encoding mitochondrial protein, transcript variant 1, mRNA [NM_173471] | 115286 |
| A_24_P69439  | 4.8 | 1.6 | 3.5 | 1.7  | SLC25A32 | Homo sapiens solute carrier family 25, member 32 (SLC25A32), nuclear gene encoding mitochondrial protein, mRNA [NM_030780]                       | 81034  |

|              |      |     |     |      |          |                                                                                                                            |       |
|--------------|------|-----|-----|------|----------|----------------------------------------------------------------------------------------------------------------------------|-------|
| A_23_P408455 | 1.3  | 1.3 | 1.2 | -2.5 | SLC25A36 | Homo sapiens solute carrier family 25, member 36 (SLC25A36), transcript variant 1, mRNA [NM_001104647]                     | 55186 |
| A_24_P201089 | -1.0 | 1.0 | 1.0 | -9.2 | SLC25A37 | Homo sapiens solute carrier family 25, member 37 (SLC25A37), nuclear gene encoding mitochondrial protein, mRNA [NM_016612] | 51312 |

|              |     |      |     |      |          |                                                                                                                            |        |
|--------------|-----|------|-----|------|----------|----------------------------------------------------------------------------------------------------------------------------|--------|
| A_23_P71117  | 2.8 | -1.2 | 2.4 | -1.2 | SLC25A40 | Homo sapiens solute carrier family 25, member 40 (SLC25A40), nuclear gene encoding mitochondrial protein, mRNA [NM_018843] | 55972  |
| A_23_P432626 | 1.2 | -5.4 | 1.2 | 1.3  | SLC25A40 | Homo sapiens solute carrier family 25, member 40 (SLC25A40), nuclear gene encoding mitochondrial protein, mRNA [NM_018843] | 55972  |
| A_23_P436526 | 1.5 | 1.8  | 1.7 | 2.5  | SLC25A42 | Homo sapiens solute carrier family 25, member 42 (SLC25A42), mRNA [NM_178526]                                              | 284439 |

|              |     |      |      |      |          |                                                                                                                            |        |
|--------------|-----|------|------|------|----------|----------------------------------------------------------------------------------------------------------------------------|--------|
| A_24_P34100  | 3.3 | 3.1  | 3.5  | 3.0  | SLC25A43 | Homo sapiens solute carrier family 25, member 43 (SLC25A43), nuclear gene encoding mitochondrial protein, mRNA [NM_145305] | 203427 |
| A_23_P64070  | 2.8 | -1.5 | -2.0 | -3.5 | SLC25A45 | Homo sapiens solute carrier family 25, member 45 (SLC25A45), transcript variant 1, mRNA [NM_182556]                        | 283130 |
| A_23_P422511 | 1.4 | 1.2  | 1.9  | 2.2  | SLC25A45 | Homo sapiens solute carrier family 25, member 45 (SLC25A45), transcript variant 1, mRNA [NM_182556]                        | 283130 |



|              |      |      |      |       |          |                                                                                                                                                                                   |        |
|--------------|------|------|------|-------|----------|-----------------------------------------------------------------------------------------------------------------------------------------------------------------------------------|--------|
| A_23_P133375 | -1.0 | -1.0 | -1.0 | -10.1 | SLC25A46 | Homo sapiens solute carrier family 25, member 46 (SLC25A46), mRNA [NM_138773]                                                                                                     | 91137  |
| A_23_P7719   | -1.2 | -1.2 | -1.2 | -3.1  | SLC25A48 | solute carrier family 25, member 48 [Source:HGNC Symbol;Acc:30451] [ENST00000420621]                                                                                              | 153328 |
| A_23_P33752  | 2.4  | 3.6  | 1.9  | 3.4   | SLC25A6  | Homo sapiens solute carrier family 25 (mitochondrial carrier; adenine nucleotide translocator), member 6 (SLC25A6), nuclear gene encoding mitochondrial protein, mRNA [NM_001636] | 293    |

|              |      |       |      |      |          |                                                                                                                         |       |
|--------------|------|-------|------|------|----------|-------------------------------------------------------------------------------------------------------------------------|-------|
| A_24_P37665  | 5.2  | 4.2   | 3.0  | 1.1  | SLC26A1  | Homo sapiens solute carrier family 26 (sulfate transporter), member 1 (SLC26A1), transcript variant 1, mRNA [NM_022042] | 10861 |
| A_23_P80954  | -4.5 | -9.5  | -6.9 | -2.6 | SLC26A1  | Homo sapiens solute carrier family 26 (sulfate transporter), member 1 (SLC26A1), transcript variant 1, mRNA [NM_022042] | 10861 |
| A_23_P116642 | -1.0 | -18.9 | -1.0 | -1.0 | SLC26A10 | Homo sapiens solute carrier family 26, member 10 (SLC26A10), mRNA [NM_133489]                                           | 65012 |

|              |      |      |      |      |          |                                                                                                         |        |
|--------------|------|------|------|------|----------|---------------------------------------------------------------------------------------------------------|--------|
| A_23_P203807 | -2.4 | 1.4  | -2.5 | -1.6 | SLC26A10 | solute carrier family 26, member 10<br>[Source:H GNC Symbol;Acc:14470]<br>[ENST00000440686]             | 65012  |
| A_23_P109895 | -1.2 | -1.1 | -1.1 | -2.3 | SLC26A6  | Homo sapiens solute carrier family 26, member 6 (SLC26A6), transcript variant 4, mRNA<br>[NM_001040454] | 65010  |
| A_24_P7974   | 1.0  | 1.0  | -2.5 | -1.2 | SLC26A6  | Homo sapiens HSPC106 mRNA, partial cds.<br>[AF161369]                                                   | 65010  |
| A_23_P30950  | 1.1  | -2.9 | -1.0 | 1.1  | SLC26A8  | Homo sapiens solute carrier family 26, member 8 (SLC26A8), transcript variant 1, mRNA<br>[NM_052961]    | 116369 |

|              |      |      |      |      |         |                                                                                                                                           |       |
|--------------|------|------|------|------|---------|-------------------------------------------------------------------------------------------------------------------------------------------|-------|
| A_23_P140450 | -1.3 | -2.3 | -3.2 | -1.5 | SLC27A2 | Homo sapiens solute carrier family 27 (fatty acid transporter), member 2 (SLC27A2), transcript variant 1, mRNA [NM_003645]                | 11001 |
| A_24_P257971 | -4.2 | 1.5  | 1.3  | 6.0  | SLC27A4 | Homo sapiens solute carrier family 27 (fatty acid transporter), member 4 (SLC27A4), mRNA [NM_005094]                                      | 10999 |
| A_23_P14667  | -1.2 | -1.4 | 1.1  | -2.2 | SLC28A1 | Homo sapiens solute carrier family 28 (sodium-coupled nucleoside transporter), member 1 (SLC28A1), transcript variant 1, mRNA [NM_004213] | 9154  |

|              |      |      |      |      |         |                                                                                                                                              |       |
|--------------|------|------|------|------|---------|----------------------------------------------------------------------------------------------------------------------------------------------|-------|
| A_23_P32078  | -1.7 | -4.3 | -1.1 | -1.1 | SLC28A3 | Homo sapiens solute carrier family 28 (sodium-coupled nucleoside transporter), member 3 (SLC28A3), transcript variant 2, mRNA [NM_022127]    | 64078 |
| A_32_P494169 | -2.2 | -1.0 | -1.0 | 1.1  | SLC28A3 | Homo sapiens solute carrier family 28 (sodium-coupled nucleoside transporter), member 3 (SLC28A3), transcript variant 1, mRNA [NM_001199633] | 64078 |

|              |     |      |     |      |         |                                                                                                                                |        |
|--------------|-----|------|-----|------|---------|--------------------------------------------------------------------------------------------------------------------------------|--------|
| A_23_P98294  | 1.8 | 2.6  | 1.1 | 2.5  | SLC29A2 | Homo sapiens solute carrier family 29 (nucleoside transporters), member 2 (SLC29A2), mRNA [NM_001532]                          | 3177   |
| A_24_P911787 | 5.7 | 2.7  | 2.1 | 2.8  | SLC29A3 | Homo sapiens solute carrier family 29 (nucleoside transporters), member 3 (SLC29A3), transcript variant 1, mRNA [NM_018344]    | 55315  |
| A_23_P168551 | 1.6 | -4.7 | 1.6 | -1.0 | SLC29A4 | Homo sapiens solute carrier family 29 (nucleoside transporters), member 4 (SLC29A4), transcript variant 1, mRNA [NM_001040661] | 222962 |

|              |     |      |      |      |         |                                                                                                                      |       |
|--------------|-----|------|------|------|---------|----------------------------------------------------------------------------------------------------------------------|-------|
| A_23_P571    | 2.3 | 1.2  | -1.3 | -1.1 | SLC2A1  | Homo sapiens solute carrier family 2 (facilitated glucose transporter), member 1 (SLC2A1), mRNA [NM_006516]          | 6513  |
| A_32_P174130 | 1.3 | -1.6 | -2.7 | 1.1  | SLC2A1  | solute carrier family 2 (facilitated glucose transporter), member 1 [Source:HGNC Symbol;Acc:11005] [ENST00000460369] | 6513  |
| A_23_P210521 | 1.0 | 1.0  | -1.3 | -4.4 | SLC2A10 | Homo sapiens solute carrier family 2 (facilitated glucose transporter), member 10 (SLC2A10), mRNA [NM_030777]        | 81031 |

|              |      |      |      |       |         |                                                                                                               |        |
|--------------|------|------|------|-------|---------|---------------------------------------------------------------------------------------------------------------|--------|
| A_23_P10211  | 1.5  | 1.7  | 3.5  | -1.1  | SLC2A13 | Homo sapiens solute carrier family 2 (facilitated glucose transporter), member 13 (SLC2A13), mRNA [NM_052885] | 114134 |
| A_23_P132569 | 2.0  | 2.0  | 2.0  | 2.6   | SLC2A2  | Homo sapiens solute carrier family 2 (facilitated glucose transporter), member 2 (SLC2A2), mRNA [NM_000340]   | 6514   |
| A_23_P107350 | -2.5 | -1.3 | -1.4 | -11.6 | SLC2A4  | Homo sapiens solute carrier family 2 (facilitated glucose transporter), member 4 (SLC2A4), mRNA [NM_001042]   | 6517   |



|              |      |      |      |      |          |                                                                                                                                      |       |
|--------------|------|------|------|------|----------|--------------------------------------------------------------------------------------------------------------------------------------|-------|
| A_23_P102575 | -1.3 | 1.0  | -2.9 | -3.2 | SLC2A4RG | Homo sapiens SLC2A4 regulator (SLC2A4RG), mRNA [NM_020062]                                                                           | 56731 |
| A_23_P169249 | 1.0  | -3.3 | -1.2 | 1.1  | SLC2A6   | Homo sapiens solute carrier family 2 (facilitated glucose transporter), member 6 (SLC2A6), transcript variant 1, mRNA [NM_017585]    | 11182 |
| A_24_P196318 | -1.1 | 1.0  | -4.7 | -1.7 | SLC2A9   | Homo sapiens solute carrier family 2 (facilitated glucose transporter), member 9 (SLC2A9), transcript variant 2, mRNA [NM_001001290] | 56606 |

|              |     |      |      |      |         |                                                                                                                         |      |
|--------------|-----|------|------|------|---------|-------------------------------------------------------------------------------------------------------------------------|------|
| A_24_P156748 | 2.9 | 4.3  | 2.7  | 2.4  | SLC30A2 | Homo sapiens solute carrier family 30 (zinc transporter), member 2 (SLC30A2), transcript variant 1, mRNA [NM_001004434] | 7780 |
| A_23_P302568 | 2.7 | -1.4 | -1.4 | 2.2  | SLC30A3 | Homo sapiens solute carrier family 30 (zinc transporter), member 3 (SLC30A3), mRNA [NM_003459]                          | 7781 |
| A_32_P227870 | 1.0 | -6.4 | -1.1 | -1.0 | SLC30A4 | solute carrier family 30 (zinc transporter), member 4 [Source:HGNC Symbol;Acc:11015] [ENST00000261867]                  | 7782 |

|              |      |      |      |      |         |                                                                                                                      |        |
|--------------|------|------|------|------|---------|----------------------------------------------------------------------------------------------------------------------|--------|
| A_23_P117679 | -1.6 | -3.5 | -1.0 | -2.8 | SLC30A4 | Homo sapiens solute carrier family 30 (zinc transporter), member 4 (SLC30A4), mRNA [NM_013309]                       | 7782   |
| A_23_P160103 | -1.3 | -1.9 | -1.9 | -6.7 | SLC30A5 | Homo sapiens solute carrier family 30 (zinc transporter), member 5 (SLC30A5), transcript variant 1, mRNA [NM_022902] | 64924  |
| A_23_P22915  | -2.5 | 1.0  | 1.1  | 1.0  | SLC30A7 | Homo sapiens solute carrier family 30 (zinc transporter), member 7 (SLC30A7), transcript variant 1, mRNA [NM_133496] | 148867 |

|              |      |      |      |      |         |                                                                                                                      |       |
|--------------|------|------|------|------|---------|----------------------------------------------------------------------------------------------------------------------|-------|
| A_24_P321068 | -1.3 | -1.9 | -2.2 | -1.3 | SLC31A1 | Homo sapiens solute carrier family 31 (copper transporters), member 1 (SLC31A1), mRNA [NM_001859]                    | 1317  |
| A_23_P58729  | 2.3  | -1.8 | 2.8  | 1.5  | SLC34A1 | Homo sapiens solute carrier family 34 (sodium phosphate), member 1 (SLC34A1), transcript variant 1, mRNA [NM_003052] | 6569  |
| A_23_P121646 | 1.7  | 1.4  | 1.4  | -2.7 | SLC34A2 | Homo sapiens solute carrier family 34 (sodium phosphate), member 2 (SLC34A2), transcript variant 1, mRNA [NM_006424] | 10568 |

|              |     |     |     |     |         |                                                                                                                                  |        |
|--------------|-----|-----|-----|-----|---------|----------------------------------------------------------------------------------------------------------------------------------|--------|
| A_23_P113682 | 3.1 | 2.5 | 1.8 | 1.8 | SLC34A3 | Homo sapiens solute carrier family 34 (sodium phosphate), member 3 (SLC34A3), transcript variant 3, mRNA [NM_080877]             | 142680 |
| A_24_P406034 | 5.7 | 1.9 | 5.2 | 5.2 | SLC35A1 | Homo sapiens solute carrier family 35 (CMP-sialic acid transporter), member A1 (SLC35A1), transcript variant 1, mRNA [NM_006416] | 10559  |

|              |     |      |      |      |         |                                                                                                                                   |       |
|--------------|-----|------|------|------|---------|-----------------------------------------------------------------------------------------------------------------------------------|-------|
| A_23_P58912  | 2.7 | -1.0 | -1.1 | 1.6  | SLC35A1 | Homo sapiens solute carrier family 35 (CMP-sialic acid transporter), member A1 (SLC35A1), transcript variant 1, mRNA [NM_006416]  | 10559 |
| A_24_P310616 | 1.1 | 1.0  | -1.7 | -3.1 | SLC35A2 | Homo sapiens solute carrier family 35 (UDP-galactose transporter), member A2 (SLC35A2), transcript variant 3, mRNA [NM_001042498] | 7355  |
| A_24_P367561 | 1.7 | 2.3  | 1.7  | 1.7  | SLC35B4 | Homo sapiens solute carrier family 35, member B4 (SLC35B4), mRNA [NM_032826]                                                      | 84912 |

|              |      |       |      |      |         |                                                                                                    |        |
|--------------|------|-------|------|------|---------|----------------------------------------------------------------------------------------------------|--------|
| A_23_P68452  | 1.4  | -1.3  | -2.1 | 1.6  | SLC35C2 | Homo sapiens solute carrier family 35, member C2 (SLC35C2), transcript variant 1, mRNA [NM_173179] | 51006  |
| A_24_P392970 | 1.1  | -11.0 | 1.1  | 1.1  | SLC35D3 | Homo sapiens solute carrier family 35, member D3 (SLC35D3), mRNA [NM_001008783]                    | 340146 |
| A_24_P378788 | -9.1 | -1.3  | -4.6 | -3.2 | SLC35E1 | Homo sapiens solute carrier family 35, member E1 (SLC35E1), mRNA [NM_024881]                       | 79939  |
| A_23_P339098 | -2.3 | -1.1  | 1.3  | 1.8  | SLC35F2 | Homo sapiens solute carrier family 35, member F2 (SLC35F2), mRNA [NM_017515]                       | 54733  |

|             |     |     |      |     |         |                                                                                                                                      |        |
|-------------|-----|-----|------|-----|---------|--------------------------------------------------------------------------------------------------------------------------------------|--------|
| A_23_P59988 | 1.0 | 2.4 | -1.0 | 1.0 | SLC35G5 | Homo sapiens solute carrier family 35, member G5 (SLC35G5), mRNA [NM_054028]                                                         | 83650  |
| A_23_P17695 | 2.7 | 2.6 | 2.5  | 2.5 | SLC37A1 | Homo sapiens solute carrier family 37 (glycerol-3-phosphate transporter), member 1 (SLC37A1), mRNA [NM_018964]                       | 54020  |
| A_23_P86931 | 1.5 | 2.2 | 1.2  | 1.2 | SLC37A2 | Homo sapiens solute carrier family 37 (glycerol-3-phosphate transporter), member 2 (SLC37A2), transcript variant 1, mRNA [NM_198277] | 219855 |



|              |     |     |       |      |          |                                                                                                                                      |        |
|--------------|-----|-----|-------|------|----------|--------------------------------------------------------------------------------------------------------------------------------------|--------|
| A_23_P158449 | 1.0 | 1.0 | -9.2  | -1.1 | SLC37A3  | Homo sapiens solute carrier family 37 (glycerol-3-phosphate transporter), member 3 (SLC37A3), transcript variant 2, mRNA [NM_032295] | 84255  |
| A_24_P261734 | 1.1 | 1.1 | -23.0 | -3.5 | SLC38A1  | Homo sapiens solute carrier family 38, member 1 (SLC38A1), transcript variant 1, mRNA [NM_030674]                                    | 81539  |
| A_23_P379630 | 1.8 | 3.1 | 3.2   | 1.3  | SLC38A10 | Homo sapiens solute carrier family 38, member 10 (SLC38A10), transcript variant 2, mRNA [NM_138570]                                  | 124565 |

|              |      |      |      |     |         |                                                                                                   |       |
|--------------|------|------|------|-----|---------|---------------------------------------------------------------------------------------------------|-------|
| A_23_P218079 | 1.3  | 2.9  | 3.9  | 2.9 | SLC38A2 | Homo sapiens solute carrier family 38, member 2 (SLC38A2), mRNA [NM_018976]                       | 54407 |
| A_23_P155487 | 3.3  | 1.2  | 3.0  | 2.4 | SLC38A3 | Homo sapiens solute carrier family 38, member 3 (SLC38A3), mRNA [NM_006841]                       | 10991 |
| A_24_P321581 | 1.1  | -2.1 | -2.2 | 1.1 | SLC38A4 | Homo sapiens solute carrier family 38, member 4 (SLC38A4), transcript variant 1, mRNA [NM_018018] | 55089 |
| A_23_P65967  | -1.4 | 1.5  | 4.0  | 2.5 | SLC38A7 | Homo sapiens solute carrier family 38, member 7 (SLC38A7), mRNA [NM_018231]                       | 55238 |

|              |     |     |     |     |          |                                                                                                                        |        |
|--------------|-----|-----|-----|-----|----------|------------------------------------------------------------------------------------------------------------------------|--------|
| A_23_P24149  | 2.2 | 3.8 | 2.2 | 1.9 | SLC39A12 | Homo sapiens solute carrier family 39 (zinc transporter), member 12 (SLC39A12), transcript variant 2, mRNA [NM_152725] | 221074 |
| A_24_P333479 | 2.2 | 2.1 | 2.0 | 2.0 | SLC39A14 | Homo sapiens solute carrier family 39 (zinc transporter), member 14 (SLC39A14), transcript variant 2, mRNA [NM_015359] | 23516  |

|              |      |      |      |      |         |                                                                                                                      |       |
|--------------|------|------|------|------|---------|----------------------------------------------------------------------------------------------------------------------|-------|
| A_24_P160460 | 1.7  | 2.1  | -2.7 | 1.2  | SLC39A3 | Homo sapiens solute carrier family 39 (zinc transporter), member 3 (SLC39A3), transcript variant 1, mRNA [NM_144564] | 29985 |
| A_24_P382467 | -1.1 | -2.6 | -2.2 | -2.2 | SLC39A3 | Homo sapiens solute carrier family 39 (zinc transporter), member 3 (SLC39A3), transcript variant 1, mRNA [NM_144564] | 29985 |
| A_23_P388170 | 2.1  | 1.0  | 1.7  | -1.9 | SLC39A3 | Homo sapiens solute carrier family 39 (zinc transporter), member 3 (SLC39A3), transcript variant 2, mRNA [NM_213568] | 29985 |

|              |     |      |      |      |         |                                                                                                                      |       |
|--------------|-----|------|------|------|---------|----------------------------------------------------------------------------------------------------------------------|-------|
| A_23_P20502  | 5.2 | 1.6  | -1.0 | 1.3  | SLC39A4 | Homo sapiens solute carrier family 39 (zinc transporter), member 4 (SLC39A4), transcript variant 1, mRNA [NM_017767] | 55630 |
| A_24_P204954 | 1.7 | 2.2  | 1.3  | 1.3  | SLC39A4 | Homo sapiens cDNA FLJ32338 fis, clone PROST2005919. [AK056900]                                                       | 55630 |
| A_23_P41424  | 1.1 | -5.7 | -1.1 | -1.0 | SLC39A8 | Homo sapiens solute carrier family 39 (zinc transporter), member 8 (SLC39A8), transcript variant 1, mRNA [NM_022154] | 64116 |

|              |      |      |       |      |        |                                                                                                                                                                                                  |      |
|--------------|------|------|-------|------|--------|--------------------------------------------------------------------------------------------------------------------------------------------------------------------------------------------------|------|
| A_24_P217234 | -1.0 | -1.0 | -12.2 | -1.0 | SLC3A1 | Homo sapiens solute carrier family 3 (cystine, dibasic and neutral amino acid transporters, activator of cystine, dibasic and neutral amino acid transport), member 1 (SLC3A1), mRNA [NM_000341] | 6519 |
| A_23_P87216  | -2.6 | -2.0 | -3.3  | -1.6 | SLC3A2 | Homo sapiens solute carrier family 3 (activators of dibasic and neutral amino acid transport), member 2 (SLC3A2), transcript variant 2, mRNA [NM_001012662]                                      | 6520 |

|              |      |      |      |      |         |                                                                                                                                                             |       |
|--------------|------|------|------|------|---------|-------------------------------------------------------------------------------------------------------------------------------------------------------------|-------|
| A_23_P75811  | -3.5 | 1.6  | 1.0  | 1.0  | SLC3A2  | Homo sapiens solute carrier family 3 (activators of dibasic and neutral amino acid transport), member 2 (SLC3A2), transcript variant 2, mRNA [NM_001012662] | 6520  |
| A_23_P102391 | -1.0 | -1.0 | -4.3 | -1.0 | SLC40A1 | Homo sapiens solute carrier family 40 (iron-regulated transporter), member 1 (SLC40A1), mRNA [NM_014585]                                                    | 30061 |
| A_23_P204801 | 2.9  | 2.8  | 2.7  | 2.9  | SLC41A2 | Homo sapiens solute carrier family 41, member 2 (SLC41A2), mRNA [NM_032148]                                                                                 | 84102 |

|              |      |      |      |      |         |                                                                             |        |
|--------------|------|------|------|------|---------|-----------------------------------------------------------------------------|--------|
| A_24_P78862  | -3.1 | -2.4 | -6.5 | -1.3 | SLC43A2 | Homo sapiens solute carrier family 43, member 2 (SLC43A2), mRNA [NM_152346] | 124935 |
| A_24_P296508 | 2.3  | 1.5  | 2.4  | 2.3  | SLC43A2 | Homo sapiens solute carrier family 43, member 2 (SLC43A2), mRNA [NM_152346] | 124935 |
| A_24_P406986 | 1.9  | 3.4  | 2.2  | -1.5 | SLC43A3 | Homo sapiens solute carrier family 43, member 3 (SLC43A3), mRNA [NM_199329] | 29015  |
| A_23_P411806 | 2.9  | 4.5  | 3.7  | 1.8  | SLC44A1 | Homo sapiens solute carrier family 44, member 1 (SLC44A1), mRNA [NM_080546] | 23446  |



|              |      |       |      |      |         |                                                                                                                        |        |
|--------------|------|-------|------|------|---------|------------------------------------------------------------------------------------------------------------------------|--------|
| A_23_P208340 | -1.3 | 1.2   | 1.2  | -2.0 | SLC44A2 | Homo sapiens solute carrier family 44, member 2 (SLC44A2), transcript variant 1, mRNA [NM_020428]                      | 57153  |
| A_23_P93349  | -1.0 | -16.0 | -1.1 | -1.0 | SLC44A4 | Homo sapiens solute carrier family 44, member 4 (SLC44A4), transcript variant 1, mRNA [NM_025257]                      | 80736  |
| A_24_P159548 | 2.1  | 1.8   | -1.6 | 1.3  | SLC46A1 | Homo sapiens solute carrier family 46 (folate transporter), member 1 (SLC46A1), transcript variant 1, mRNA [NM_080669] | 113235 |

|              |      |      |       |      |         |                                                                                                   |        |
|--------------|------|------|-------|------|---------|---------------------------------------------------------------------------------------------------|--------|
| A_23_P105856 | -4.2 | -1.1 | -1.2  | -1.2 | SLC46A3 | Homo sapiens solute carrier family 46, member 3 (SLC46A3), transcript variant 1, mRNA [NM_181785] | 283537 |
| A_23_P207221 | 9.6  | 6.0  | 10.1  | 1.1  | SLC47A1 | Homo sapiens solute carrier family 47, member 1 (SLC47A1), mRNA [NM_018242]                       | 55244  |
| A_24_P142503 | 3.2  | 3.2  | 3.3   | 1.6  | SLC47A1 | Homo sapiens solute carrier family 47, member 1 (SLC47A1), mRNA [NM_018242]                       | 55244  |
| A_23_P77908  | 1.0  | -3.2 | -18.3 | -1.0 | SLC47A2 | Homo sapiens solute carrier family 47, member 2 (SLC47A2), transcript variant 1, mRNA [NM_152908] | 146802 |

|              |     |      |      |      |          |                                                                                                                                   |       |
|--------------|-----|------|------|------|----------|-----------------------------------------------------------------------------------------------------------------------------------|-------|
| A_23_P204511 | 1.3 | -1.1 | 2.0  | 1.3  | SLC48A1  | Homo sapiens cDNA FLJ20489 fis, clone KAT08285. [AK000496]                                                                        | 55652 |
| A_24_P930111 | 2.6 | 2.5  | 1.3  | -1.1 | SLC4A10  | Homo sapiens solute carrier family 4, sodium bicarbonate transporter, member 10 (SLC4A10), transcript variant 2, mRNA [NM_022058] | 57282 |
| A_23_P56810  | 1.2 | 2.2  | -2.7 | -1.8 | SLC4A1AP | Homo sapiens solute carrier family 4 (anion exchanger), member 1, adaptor protein (SLC4A1AP), mRNA [NM_018158]                    | 22950 |

|              |      |      |      |      |        |                                                                                                                                   |      |
|--------------|------|------|------|------|--------|-----------------------------------------------------------------------------------------------------------------------------------|------|
| A_23_P39647  | -8.4 | -1.7 | -3.7 | -1.7 | SLC4A3 | Homo sapiens solute carrier family 4, anion exchanger, member 3 (SLC4A3), transcript variant 1, mRNA [NM_005070]                  | 6508 |
| A_32_P349145 | 1.5  | 1.5  | -2.4 | -1.6 | SLC4A4 | Homo sapiens solute carrier family 4, sodium bicarbonate cotransporter, member 4 (SLC4A4), transcript variant 2, mRNA [NM_003759] | 8671 |
| A_23_P132468 | 1.2  | 1.1  | -1.2 | -3.4 | SLC4A7 | Homo sapiens solute carrier family 4, sodium bicarbonate cotransporter, member 7 (SLC4A7), mRNA [NM_003615]                       | 9497 |

|             |      |      |      |     |         |                                                                                                                                   |       |
|-------------|------|------|------|-----|---------|-----------------------------------------------------------------------------------------------------------------------------------|-------|
| A_23_P72912 | -2.2 | -1.0 | -1.1 | 1.0 | SLC4A8  | Homo sapiens solute carrier family 4, sodium bicarbonate cotransporter, member 8 (SLC4A8), transcript variant 2, mRNA [NM_004858] | 9498  |
| A_24_P88565 | -2.2 | -3.4 | -1.5 | 1.1 | SLC50A1 | Homo sapiens solute carrier family 50 (sugar transporter), member 1 (SLC50A1), transcript variant 1, mRNA [NM_018845]             | 55974 |

|              |      |      |      |      |         |                                                                                                                                  |        |
|--------------|------|------|------|------|---------|----------------------------------------------------------------------------------------------------------------------------------|--------|
| A_23_P328022 | -6.9 | 1.0  | -1.0 | 1.1  | SLC5A10 | Homo sapiens solute carrier family 5 (sodium/glucose cotransporter), member 10 (SLC5A10), transcript variant 1, mRNA [NM_152351] | 125206 |
| A_23_P411277 | -1.3 | 2.3  | -2.2 | -1.6 | SLC5A2  | Homo sapiens solute carrier family 5 (sodium/glucose cotransporter), member 2 (SLC5A2), mRNA [NM_003041]                         | 6524   |
| A_23_P57492  | 1.0  | -4.0 | -1.0 | 1.1  | SLC5A4  | Homo sapiens solute carrier family 5 (low affinity glucose cotransporter), member 4 (SLC5A4), mRNA [NM_014227]                   | 6527   |

|              |      |      |      |      |        |                                                                                                                                        |      |
|--------------|------|------|------|------|--------|----------------------------------------------------------------------------------------------------------------------------------------|------|
| A_23_P101774 | 2.2  | 5.0  | 8.7  | 1.8  | SLC5A5 | Homo sapiens solute carrier family 5 (sodium iodide symporter), member 5 (SLC5A5), mRNA [NM_000453]                                    | 6528 |
| A_24_P247732 | -1.2 | -3.7 | -1.4 | -2.6 | SLC5A6 | Homo sapiens solute carrier family 5 (sodium-dependent vitamin transporter), member 6 (SLC5A6), transcript variant 1, mRNA [NM_021095] | 8884 |

|              |      |      |      |      |         |                                                                                                                                           |       |
|--------------|------|------|------|------|---------|-------------------------------------------------------------------------------------------------------------------------------------------|-------|
| A_24_P923483 | -5.2 | 1.1  | 1.1  | 1.1  | SLC6A13 | Homo sapiens solute carrier family 6 (neurotransmitter transporter, GABA), member 13 (SLC6A13), transcript variant 3, mRNA [NM_001243392] | 6540  |
| A_24_P365721 | -1.1 | -1.1 | -2.6 | -1.2 | SLC6A14 | Homo sapiens solute carrier family 6 (amino acid transporter), member 14 (SLC6A14), mRNA [NM_007231]                                      | 11254 |



|              |      |      |     |      |         |                                                                                                                                    |       |
|--------------|------|------|-----|------|---------|------------------------------------------------------------------------------------------------------------------------------------|-------|
| A_23_P356598 | -2.8 | -4.1 | 1.0 | -2.4 | SLC6A15 | Homo sapiens solute carrier family 6 (neutral amino acid transporter), member 15 (SLC6A15), transcript variant 2, mRNA [NM_018057] | 55117 |
| A_23_P13725  | -5.0 | 1.1  | 1.1 | 1.5  | SLC6A15 | Homo sapiens solute carrier family 6 (neutral amino acid transporter), member 15 (SLC6A15), transcript variant 1, mRNA [NM_182767] | 55117 |

|              |     |     |     |      |         |                                                                                                                                    |        |
|--------------|-----|-----|-----|------|---------|------------------------------------------------------------------------------------------------------------------------------------|--------|
| A_24_P109838 | 2.3 | 2.2 | 2.3 | 1.8  | SLC6A15 | Homo sapiens solute carrier family 6 (neutral amino acid transporter), member 15 (SLC6A15), transcript variant 1, mRNA [NM_182767] | 55117  |
| A_24_P212234 | 2.7 | 3.2 | 4.4 | 2.5  | SLC6A18 | Homo sapiens solute carrier family 6, member 18 (SLC6A18), mRNA [NM_182632]                                                        | 348932 |
| A_23_P62070  | 3.3 | 3.7 | 2.9 | -1.1 | SLC6A19 | Homo sapiens solute carrier family 6 (neutral amino acid transporter), member 19 (SLC6A19), mRNA [NM_00103841]                     | 340024 |

|              |      |      |      |      |        |                                                                                                                                         |      |
|--------------|------|------|------|------|--------|-----------------------------------------------------------------------------------------------------------------------------------------|------|
| A_23_P116624 | -1.4 | -1.8 | -1.3 | -2.3 | SLC6A5 | Homo sapiens solute carrier family 6 (neurotransmitter transporter, glycine), member 5 (SLC6A5), mRNA [NM_004211]                       | 9152 |
| A_23_P69206  | 1.6  | -1.4 | -2.3 | 2.8  | SLC6A6 | Homo sapiens solute carrier family 6 (neurotransmitter transporter, taurine), member 6 (SLC6A6), transcript variant 1, mRNA [NM_003043] | 6533 |

|              |      |      |      |     |        |                                                                                                                                         |      |
|--------------|------|------|------|-----|--------|-----------------------------------------------------------------------------------------------------------------------------------------|------|
| A_24_P46093  | -1.6 | 1.5  | -2.0 | 1.0 | SLC6A6 | Homo sapiens solute carrier family 6 (neurotransmitter transporter, taurine), member 6 (SLC6A6), transcript variant 1, mRNA [NM_003043] | 6533 |
| A_24_P359191 | 2.8  | -1.2 | 3.4  | 3.1 | SLC6A6 | Homo sapiens solute carrier family 6 (neurotransmitter transporter, taurine), member 6 (SLC6A6), transcript variant 1, mRNA [NM_003043] | 6533 |

|              |        |      |      |      |        |                                                                                                                          |      |
|--------------|--------|------|------|------|--------|--------------------------------------------------------------------------------------------------------------------------|------|
| A_24_P253251 | -280.7 | -1.0 | -1.1 | -3.6 | SLC7A1 | Homo sapiens solute carrier family 7 (cationic amino acid transporter, y+ system), member 1 (SLC7A1), mRNA [NM_003045]   | 6541 |
| A_23_P117242 | -2.0   | 1.0  | -1.2 | -1.8 | SLC7A1 | Homo sapiens solute carrier family 7 (cationic amino acid transporter, y+ system), member 1 (SLC7A1), mRNA [NM_003045]   | 6541 |
| A_23_P3792   | -1.3   | 3.4  | 3.2  | -1.0 | SLC7A5 | Homo sapiens solute carrier family 7 (amino acid transporter light chain, L system), member 5 (SLC7A5), mRNA [NM_003486] | 8140 |

|              |      |      |      |      |          |                                                                                                                                                     |       |
|--------------|------|------|------|------|----------|-----------------------------------------------------------------------------------------------------------------------------------------------------|-------|
| A_24_P159312 | 1.0  | -1.0 | -2.9 | 1.0  | SLC7A6   | Homo sapiens solute carrier family 7 (amino acid transporter light chain, y+L system), member 6 (SLC7A6), transcript variant 1, mRNA [NM_001076785] | 9057  |
| A_24_P125081 | -1.0 | -1.0 | 2.3  | -1.0 | SLC7A6OS | solute carrier family 7, member 6 opposite strand [Source:HGNC Symbol;Acc:25807] [ENST00000263997]                                                  | 84138 |
| A_32_P147078 | -1.5 | -3.0 | -1.0 | -2.9 | SLC8A1   | Homo sapiens solute carrier family 8 (sodium/calcium exchanger), member 1 (SLC8A1), transcript variant A, mRNA [NM_021097]                          | 6546  |

|              |      |      |      |     |         |                                                                                                                            |        |
|--------------|------|------|------|-----|---------|----------------------------------------------------------------------------------------------------------------------------|--------|
| A_24_P913900 | 1.6  | 1.6  | -3.2 | 1.0 | SLC8A1  | H.sapiens mRNA for Na+/Ca2+ exchanger isoform. [X91815]                                                                    | 6546   |
| A_23_P336954 | 1.4  | 1.0  | 2.4  | 3.4 | SLC8A2  | Homo sapiens solute carrier family 8 (sodium/calcium exchanger), member 2 (SLC8A2), mRNA [NM_015063]                       | 6543   |
| A_24_P167654 | -1.5 | -2.1 | 1.4  | 1.5 | SLC8A3  | Homo sapiens solute carrier family 8 (sodium/calcium exchanger), member 3 (SLC8A3), transcript variant c, mRNA [NM_183002] | 6547   |
| A_24_P24770  | 1.2  | 3.6  | 2.8  | 1.5 | SLC9A10 | Homo sapiens solute carrier family 9, member 10 (SLC9A10), mRNA [NM_183061]                                                | 285335 |

|              |      |      |      |      |          |                                                                                                                                           |       |
|--------------|------|------|------|------|----------|-------------------------------------------------------------------------------------------------------------------------------------------|-------|
| A_23_P30582  | 1.1  | 1.1  | -1.0 | -3.2 | SLC9A3   | Homo sapiens solute carrier family 9 (sodium/hydrogen exchanger), member 3 (SLC9A3), mRNA [NM_004174]                                     | 6550  |
| A_24_P364838 | -1.9 | -2.0 | -3.6 | 1.1  | SLC9A3R2 | Homo sapiens solute carrier family 9 (sodium/hydrogen exchanger), member 3 regulator 2 (SLC9A3R2), transcript variant 2, mRNA [NM_004785] | 9351  |
| A_23_P11032  | -1.0 | -2.7 | -2.4 | -1.1 | SLC9A7   | Homo sapiens solute carrier family 9 (sodium/hydrogen exchanger), member 7 (SLC9A7), mRNA [NM_032591]                                     | 84679 |



|              |      |      |      |      |        |                                                                                                                |        |
|--------------|------|------|------|------|--------|----------------------------------------------------------------------------------------------------------------|--------|
| A_24_P58054  | -3.5 | -1.5 | -1.7 | -1.6 | SLC9A8 | Homo sapiens solute carrier family 9 (sodium/hydrogen exchanger), member 8 (SLC9A8), mRNA [NM_015266]          | 23315  |
| A_32_P46214  | 47.7 | 46.4 | 30.8 | 48.2 | SLC9A9 | Homo sapiens solute carrier family 9 (sodium/hydrogen exchanger), member 9 (SLC9A9), mRNA [NM_173653]          | 285195 |
| A_23_P384965 | -4.8 | -1.2 | -1.2 | 1.7  | SLC9A9 | solute carrier family 9 (sodium/hydrogen exchanger), member 9 [Source:HGNC Symbol;Acc:20653] [ENST00000498717] | 285195 |

|              |      |      |      |      |        |                                                                                                                                                                                        |        |
|--------------|------|------|------|------|--------|----------------------------------------------------------------------------------------------------------------------------------------------------------------------------------------|--------|
| A_24_P657226 | -1.0 | -1.0 | -1.1 | -9.6 | SLC9B1 | Homo sapiens solute carrier family 9, subfamily B (cation proton antiporter 2), member 1 (SLC9B1), nuclear gene encoding mitochondrial protein, transcript variant 1, mRNA [NM_139173] | 150159 |
| A_23_P415611 | -2.0 | 1.1  | 1.1  | -1.2 | SLC9B1 | Homo sapiens solute carrier family 9, subfamily B (cation proton antiporter 2), member 1 (SLC9B1), nuclear gene encoding mitochondrial protein, transcript variant 1, mRNA [NM_139173] | 150159 |

|             |     |      |      |      |         |                                                                                                                                                                  |        |
|-------------|-----|------|------|------|---------|------------------------------------------------------------------------------------------------------------------------------------------------------------------|--------|
| A_23_P81094 | 2.6 | 2.5  | 2.3  | 1.6  | SLC9B2  | Homo sapiens solute carrier family 9, subfamily B (cation proton antiporter 2), member 2 (SLC9B2), nuclear gene encoding mitochondrial protein, mRNA [NM_178833] | 133308 |
| A_23_P13820 | 1.0 | -1.0 | -1.1 | -2.1 | SLC01A2 | Homo sapiens solute carrier organic anion transporter family, member 1A2 (SLC01A2), transcript variant 1, mRNA [NM_134431]                                       | 6579   |

|              |      |      |      |      |         |                                                                                                                            |       |
|--------------|------|------|------|------|---------|----------------------------------------------------------------------------------------------------------------------------|-------|
| A_23_P128254 | 1.0  | -8.9 | -1.0 | 1.0  | SLCO1B1 | Homo sapiens solute carrier organic anion transporter family, member 1B1 (SLCO1B1), mRNA [NM_006446]                       | 10599 |
| A_23_P105475 | -2.1 | 1.9  | 1.1  | 1.1  | SLCO1B3 | Homo sapiens solute carrier organic anion transporter family, member 1B3 (SLCO1B3), mRNA [NM_019844]                       | 28234 |
| A_23_P116868 | -1.8 | -1.1 | -1.0 | -2.3 | SLCO1C1 | Homo sapiens solute carrier organic anion transporter family, member 1C1 (SLCO1C1), transcript variant 2, mRNA [NM_017435] | 53919 |

|              |      |      |      |      |         |                                                                                                                            |        |
|--------------|------|------|------|------|---------|----------------------------------------------------------------------------------------------------------------------------|--------|
| A_24_P588897 | 3.6  | 3.5  | 3.2  | 3.3  | SLCO3A1 | Homo sapiens solute carrier organic anion transporter family, member 3A1 (SLCO3A1), transcript variant 1, mRNA [NM_013272] | 28232  |
| A_23_P389141 | -3.7 | -1.0 | -1.1 | 1.0  | SLFNL1  | Homo sapiens schlafen-like 1 (SLFNL1), transcript variant 1, mRNA [NM_144990]                                              | 200172 |
| A_23_P161386 | -2.0 | 2.4  | -3.2 | -1.0 | SLIT1   | Homo sapiens slit homolog 1 (Drosophila) (SLIT1), mRNA [NM_003061]                                                         | 6585   |

|              |      |      |      |      |         |                                                                              |        |
|--------------|------|------|------|------|---------|------------------------------------------------------------------------------|--------|
| A_24_P910566 | 16.7 | 16.8 | 9.9  | 13.6 | SLIT1   | slit homolog 1 (Drosophila) [Source:HGNC Symbol;Acc:11085] [ENST00000497714] | 6585   |
| A_23_P58588  | 4.0  | 4.6  | 4.0  | 3.0  | SLIT3   | Homo sapiens slit homolog 3 (Drosophila) (SLIT3), mRNA [NM_003062]           | 6586   |
| A_23_P37041  | -3.5 | 1.1  | 1.1  | 1.0  | SLITRK1 | Homo sapiens SLIT and NTRK-like family, member 1 (SLITRK1), mRNA [NM_052910] | 114798 |
| A_32_P136351 | -1.3 | -1.8 | -2.3 | -2.4 | SLITRK1 | Homo sapiens SLIT and NTRK-like family, member 1 (SLITRK1), mRNA [NM_052910] | 114798 |

|              |      |      |      |      |         |                                                                                                    |        |
|--------------|------|------|------|------|---------|----------------------------------------------------------------------------------------------------|--------|
| A_23_P18362  | 3.3  | 1.6  | -1.1 | 4.0  | SLITRK3 | Homo sapiens SLIT and NTRK-like family, member 3 (SLITRK3), mRNA [NM_014926]                       | 22865  |
| A_32_P131640 | 1.1  | 1.1  | -2.7 | -1.0 | SLITRK4 | Homo sapiens SLIT and NTRK-like family, member 4 (SLITRK4), transcript variant 2, mRNA [NM_173078] | 139065 |
| A_23_P202199 | -2.5 | -2.6 | -2.9 | -5.1 | SLK     | Homo sapiens STE20-like kinase (SLK), mRNA [NM_014720]                                             | 9748   |
| A_24_P146670 | -1.4 | -3.7 | 1.0  | 1.0  | SLK     | Homo sapiens STE20-like kinase (SLK), mRNA [NM_014720]                                             | 9748   |
| A_23_P91230  | 1.1  | -2.1 | 1.1  | -1.2 | SLPI    | Homo sapiens secretory leukocyte peptidase inhibitor (SLPI), mRNA [NM_003064]                      | 6590   |

|              |     |      |      |      |       |                                                                                            |       |
|--------------|-----|------|------|------|-------|--------------------------------------------------------------------------------------------|-------|
| A_24_P190472 | 4.9 | 3.8  | -1.9 | 3.6  | SLPI  | Homo sapiens secretory leukocyte peptidase inhibitor (SLPI), mRNA [NM_003064]              | 6590  |
| A_24_P568190 | 1.0 | 1.0  | -9.4 | -1.1 | SMA4  | Homo sapiens glucuronidase, beta pseudogene 1, mRNA (cDNA clone IMAGE:4824349). [BC035411] | 11039 |
| A_23_P121869 | 1.1 | -5.7 | -1.5 | -1.0 | SMA5  | Homo sapiens glucuronidase, beta pseudogene (SMA5), non-coding RNA [NR_034021]             | 11042 |
| A_23_P212870 | 1.1 | -2.1 | 1.0  | -1.0 | SMAD1 | Homo sapiens SMAD family member 1 (SMAD1), transcript variant 1, mRNA [NM_005900]          | 4086  |



|              |      |      |      |      |           |                                                                                                 |      |
|--------------|------|------|------|------|-----------|-------------------------------------------------------------------------------------------------|------|
| A_32_P12580  | -7.8 | 1.3  | 1.2  | 1.0  | SMAD2     | Homo sapiens SMAD family member 2 (SMAD2), transcript variant 2, mRNA [NM_001003652]            | 4087 |
| A_24_P202527 | -1.3 | -1.9 | -3.5 | -1.9 | SMAD2     | Homo sapiens SMAD family member 2 (SMAD2), transcript variant 2, mRNA [NM_001003652]            | 4087 |
| A_23_P359091 | -1.3 | -2.3 | 2.5  | 1.2  | SMAD3     | Homo sapiens mad protein homolog (hMAD-3) mRNA, complete cds. [U68019]                          | 4088 |
| A_23_P399797 | 1.7  | 1.7  | 2.4  | 1.0  | SMAD5-AS1 | Homo sapiens SMAD5 antisense RNA 1 (non-protein coding) (SMAD5-AS1), non-coding RNA [NR_026763] | 9597 |

|              |      |      |      |      |       |                                                                                   |       |
|--------------|------|------|------|------|-------|-----------------------------------------------------------------------------------|-------|
| A_23_P65812  | 1.1  | -2.3 | -1.0 | -2.1 | SMAD6 | Homo sapiens SMAD family member 6 (SMAD6), transcript variant 1, mRNA [NM_005585] | 4091  |
| A_23_P55518  | 1.4  | 2.7  | 1.3  | 1.3  | SMAD7 | Homo sapiens SMAD family member 7 (SMAD7), transcript variant 1, mRNA [NM_005904] | 4092  |
| A_23_P2814   | 5.7  | 4.7  | 3.1  | 2.6  | SMAD9 | Homo sapiens SMAD family member 9 (SMAD9), transcript variant b, mRNA [NM_005905] | 4093  |
| A_24_P225325 | -3.3 | -4.2 | -1.8 | 1.1  | SMAP2 | Homo sapiens small ArfGAP2 (SMAP2), transcript variant 1, mRNA [NM_022733]        | 64744 |

|              |      |      |      |      |         |                                                                                                                                                                  |      |
|--------------|------|------|------|------|---------|------------------------------------------------------------------------------------------------------------------------------------------------------------------|------|
| A_23_P39040  | -1.6 | -1.1 | -2.7 | -2.5 | SMARCA4 | Homo sapiens SWI/SNF related, matrix associated, actin dependent regulator of chromatin, subfamily a, member 4 (SMARCA4), transcript variant 3, mRNA [NM_003072] | 6597 |
| A_24_P212851 | -1.7 | 2.1  | 1.9  | 1.5  | SMARCA4 | Homo sapiens SWI/SNF related, matrix associated, actin dependent regulator of chromatin, subfamily a, member 4 (SMARCA4), transcript variant 3, mRNA [NM_003072] | 6597 |

|             |     |     |      |      |         |                                                                                                                                                                  |      |
|-------------|-----|-----|------|------|---------|------------------------------------------------------------------------------------------------------------------------------------------------------------------|------|
| A_23_P39034 | 1.3 | 1.1 | -2.8 | -1.9 | SMARCA4 | Homo sapiens SWI/SNF related, matrix associated, actin dependent regulator of chromatin, subfamily a, member 4 (SMARCA4), transcript variant 3, mRNA [NM_003072] | 6597 |
| A_32_P93187 | 1.0 | 1.3 | -2.5 | -1.3 | SMARCA5 | Homo sapiens SWI/SNF related, matrix associated, actin dependent regulator of chromatin, subfamily a, member 5 (SMARCA5), mRNA [NM_003601]                       | 8467 |

|              |     |     |      |     |         |                                                                                                                                            |      |
|--------------|-----|-----|------|-----|---------|--------------------------------------------------------------------------------------------------------------------------------------------|------|
| A_23_P83453  | 2.5 | 1.3 | 2.7  | 1.7 | SMARCC1 | Homo sapiens SWI/SNF related, matrix associated, actin dependent regulator of chromatin, subfamily c, member 1 (SMARCC1), mRNA [NM_003074] | 6599 |
| A_32_P112104 | 1.8 | 1.8 | -1.0 | 4.9 | SMARCC1 | Homo sapiens SWI/SNF related, matrix associated, actin dependent regulator of chromatin, subfamily c, member 1 (SMARCC1), mRNA [NM_003074] | 6599 |

|              |       |      |      |      |         |                                                                                                                                                                  |      |
|--------------|-------|------|------|------|---------|------------------------------------------------------------------------------------------------------------------------------------------------------------------|------|
| A_23_P116682 | 2.1   | 2.7  | 1.9  | 1.7  | SMARCC2 | Homo sapiens SWI/SNF related, matrix associated, actin dependent regulator of chromatin, subfamily c, member 2 (SMARCC2), transcript variant 2, mRNA [NM_139067] | 6601 |
| A_23_P204745 | -14.6 | -1.0 | -1.1 | -1.7 | SMARCD1 | Homo sapiens SWI/SNF related, matrix associated, actin dependent regulator of chromatin, subfamily d, member 1 (SMARCD1), transcript variant 2, mRNA [NM_139071] | 6602 |

|              |      |      |      |      |         |                                                                                                                                                                  |       |
|--------------|------|------|------|------|---------|------------------------------------------------------------------------------------------------------------------------------------------------------------------|-------|
| A_23_P122852 | 2.4  | 3.5  | 2.4  | 1.4  | SMARCD3 | Homo sapiens SWI/SNF related, matrix associated, actin dependent regulator of chromatin, subfamily d, member 3 (SMARCD3), transcript variant 2, mRNA [NM_003078] | 6604  |
| A_23_P217411 | 1.5  | -1.5 | -2.9 | -2.3 | SMC1A   | Homo sapiens structural maintenance of chromosomes 1A (SMC1A), mRNA [NM_006306]                                                                                  | 8243  |
| A_23_P60271  | -2.6 | -1.3 | -1.5 | -1.0 | SMC2    | Homo sapiens structural maintenance of chromosomes 2 (SMC2), transcript variant 1, mRNA [NM_001042550]                                                           | 10592 |

|              |      |      |      |      |      |                                                                                                                                        |       |
|--------------|------|------|------|------|------|----------------------------------------------------------------------------------------------------------------------------------------|-------|
| A_32_P126609 | 2.9  | -1.1 | 2.6  | 2.5  | SMC5 | Homo sapiens structural maintenance of chromosomes 5 (SMC5), mRNA [NM_015110]                                                          | 23137 |
| A_23_P349615 | -7.2 | -2.2 | -1.1 | -1.1 | SMC5 | Homo sapiens structural maintenance of chromosomes 5 (SMC5), mRNA [NM_015110]                                                          | 23137 |
| A_24_P336596 | 2.1  | 1.3  | 1.9  | 1.5  | SMCP | Homo sapiens sperm mitochondria-associated cysteine-rich protein (SMCP), nuclear gene encoding mitochondrial protein, mRNA [NM_030663] | 4184  |



|              |      |      |      |      |       |                                                                                                                                                                 |        |
|--------------|------|------|------|------|-------|-----------------------------------------------------------------------------------------------------------------------------------------------------------------|--------|
| A_23_P388798 | -1.0 | -1.2 | -1.9 | -4.8 | SMCR5 | Homo sapiens Smith-Magenis syndrome chromosome region, candidate 5 (non-protein coding) (SMCR5), non-coding RNA [NR_024007]                                     | 140771 |
| A_23_P501372 | -5.0 | -4.9 | 1.0  | 1.1  | SMCR7 | Homo sapiens Smith-Magenis syndrome chromosome region, candidate 7 (SMCR7), nuclear gene encoding mitochondrial protein, transcript variant 1, mRNA [NM_139162] | 125170 |

|              |      |     |      |      |       |                                                                                                                |       |
|--------------|------|-----|------|------|-------|----------------------------------------------------------------------------------------------------------------|-------|
| A_24_P369691 | -2.1 | 1.1 | -3.7 | -1.0 | SMEK1 | Homo sapiens SMEK homolog 1, suppressor of mek1 (Dictyostelium) (SMEK1), mRNA [NM_032560]                      | 55671 |
| A_23_P218158 | 2.6  | 1.9 | 1.3  | 8.2  | SMEK1 | Homo sapiens SMEK homolog 1, suppressor of mek1 (Dictyostelium) (SMEK1), mRNA [NM_032560]                      | 55671 |
| A_32_P203592 | -3.4 | 1.0 | 1.0  | 1.1  | SMG1  | Homo sapiens smg-1 homolog, phosphatidylinositol 3-kinase-related kinase (C. elegans) (SMG1), mRNA [NM_015092] | 23049 |

|              |     |      |      |     |      |                                                                                                                |       |
|--------------|-----|------|------|-----|------|----------------------------------------------------------------------------------------------------------------|-------|
| A_32_P142881 | 1.1 | -2.2 | 1.0  | 1.1 | SMG1 | Homo sapiens smg-1 homolog, phosphatidylinositol 3-kinase-related kinase (C. elegans) (SMG1), mRNA [NM_015092] | 23049 |
| A_32_P116323 | 1.1 | 1.0  | -2.1 | 1.0 | SMG1 | Homo sapiens smg-1 homolog, phosphatidylinositol 3-kinase-related kinase (C. elegans) (SMG1), mRNA [NM_015092] | 23049 |
| A_23_P26358  | 1.4 | 1.1  | 2.1  | 2.1 | SMG1 | Homo sapiens smg-1 homolog, phosphatidylinositol 3-kinase-related kinase (C. elegans) (SMG1), mRNA [NM_015092] | 23049 |

|              |      |      |      |      |      |                                                                                                                             |       |
|--------------|------|------|------|------|------|-----------------------------------------------------------------------------------------------------------------------------|-------|
| A_23_P129871 | 3.5  | 5.0  | 3.0  | 2.2  | SMG6 | Homo sapiens cDNA FLJ14069 fis, clone HEMBB10 01562, weakly similar to CYLICIN II. [AK024131]                               | 23293 |
| A_23_P201647 | -1.4 | -4.1 | -1.6 | -1.6 | SMG7 | Homo sapiens smg-7 homolog, nonsense mediated mRNA decay factor (C. elegans) (SMG7), transcript variant 1, mRNA [NM_173156] | 9887  |
| A_24_P402090 | 1.2  | -1.9 | -2.4 | -1.2 | SMG8 | Homo sapiens chromosome 17 open reading frame 71, mRNA (cDNA clone IMAGE:5178217), partial cds. [BC031604]                  | 55181 |

|              |      |     |      |      |       |                                                                                                         |       |
|--------------|------|-----|------|------|-------|---------------------------------------------------------------------------------------------------------|-------|
| A_23_P58466  | 2.1  | 1.0 | -1.0 | 1.0  | SMN1  | Homo sapiens survival of motor neuron 1, telomeric (SMN1), transcript variant d, mRNA [NM_000344]       | 6606  |
| A_23_P70818  | -2.1 | 1.1 | -1.6 | -5.5 | SMO   | Homo sapiens smoothened, frizzled family receptor (SMO), mRNA [NM_005631]                               | 6608  |
| A_24_P150466 | -2.2 | 1.0 | -1.0 | -1.4 | SMOC1 | Homo sapiens SPARC related modular calcium binding 1 (SMOC1), transcript variant 1, mRNA [NM_001034852] | 64093 |

|              |      |      |      |      |         |                                                                                                                       |       |
|--------------|------|------|------|------|---------|-----------------------------------------------------------------------------------------------------------------------|-------|
| A_23_P203488 | 1.7  | 1.9  | 2.0  | 1.9  | SMPD1   | Homo sapiens sphingomyelin phosphodiesterase 1, acid lysosomal (SMPD1), transcript variant 1, mRNA [NM_000543]        | 6609  |
| A_23_P82162  | -3.7 | 1.0  | 1.0  | 1.0  | SMPD2   | Homo sapiens sphingomyelin phosphodiesterase 2, neutral membrane (neutral sphingomyelinase) (SMPD2), mRNA [NM_003080] | 6610  |
| A_32_P223859 | -1.0 | -2.1 | -2.5 | -1.0 | SMPDL3A | Homo sapiens sphingomyelin phosphodiesterase, acid-like 3A (SMPDL3A), mRNA [NM_006714]                                | 10924 |

|              |      |      |      |      |         |                                                                                                                 |       |
|--------------|------|------|------|------|---------|-----------------------------------------------------------------------------------------------------------------|-------|
| A_23_P160881 | -2.0 | -2.8 | -1.3 | -3.8 | SMPDL3B | Homo sapiens sphingomyelin phosphodiesterase, acid-like 3B (SMPDL3B), transcript variant 2, mRNA [NM_001009568] | 27293 |
| A_23_P253542 | -1.0 | -2.0 | -1.1 | -1.1 | SMPX    | Homo sapiens small muscle protein, X-linked (SMPX), mRNA [NM_014332]                                            | 23676 |
| A_32_P50452  | 3.9  | 1.4  | 4.3  | 1.9  | SMS     | Homo sapiens spermine synthase (SMS), mRNA [NM_004595]                                                          | 6611  |
| A_23_P211428 | -2.0 | -1.5 | -2.5 | -3.0 | SMTN    | Homo sapiens smoothelin (SMTN), transcript variant 2, mRNA [NM_134269]                                          | 6525  |

|              |      |      |      |      |        |                                                                                                           |       |
|--------------|------|------|------|------|--------|-----------------------------------------------------------------------------------------------------------|-------|
| A_23_P353316 | -1.0 | -1.0 | -1.1 | -5.2 | SMURF1 | Homo sapiens SMAD specific E3 ubiquitin protein ligase 1 (SMURF1), transcript variant 1, mRNA [NM_020429] | 57154 |
| A_23_P51410  | -8.0 | 1.0  | -1.1 | 1.0  | SMYD3  | Homo sapiens SET and MYND domain containing 3 (SMYD3), transcript variant 2, mRNA [NM_022743]             | 64754 |
| A_32_P103291 | 1.0  | 1.0  | 1.0  | -2.1 | SMYD3  | Homo sapiens SET and MYND domain containing 3 (SMYD3), transcript variant 2, mRNA [NM_022743]             | 64754 |



|              |      |      |       |      |        |                                                                                                      |       |
|--------------|------|------|-------|------|--------|------------------------------------------------------------------------------------------------------|-------|
| A_23_P91015  | -3.1 | -4.5 | -18.2 | -3.0 | SMYD5  | Homo sapiens SMYD family member 5 (SMYD5), mRNA [NM_006062]                                          | 10322 |
| A_23_P131846 | -1.9 | -2.0 | -1.1  | -2.1 | SNAI1  | Homo sapiens snail homolog 1 (Drosophila) (SNAI1), mRNA [NM_005985]                                  | 6615  |
| A_24_P937139 | -1.2 | -6.4 | -1.5  | -1.7 | SNAI2  | Homo sapiens Slug mRNA, partial cds. [U97060]                                                        | 6591  |
| A_23_P206177 | 1.7  | 2.1  | -2.6  | -1.0 | SNAP23 | Homo sapiens synaptosomal-associated protein, 23kDa (SNAP23), transcript variant 1, mRNA [NM_003825] | 8773  |

|              |     |      |     |      |        |                                                                                                                      |       |
|--------------|-----|------|-----|------|--------|----------------------------------------------------------------------------------------------------------------------|-------|
| A_23_P214803 | 2.0 | 1.6  | 1.8 | -2.1 | SNAP91 | Homo sapiens synaptosomal-associated protein, 91kDa homolog (mouse) (SNAP91), transcript variant 1, mRNA [NM_014841] | 9892  |
| A_23_P37244  | 2.1 | 2.0  | 1.8 | 1.2  | SNAPC1 | Homo sapiens small nuclear RNA activating complex, polypeptide 1, 43kDa (SNAPC1), mRNA [NM_003082]                   | 6617  |
| A_23_P383977 | 1.2 | -2.9 | 1.7 | 1.7  | SNAPC5 | Homo sapiens small nuclear RNA activating complex, polypeptide 5, 19kDa (SNAPC5), mRNA [NM_006049]                   | 10302 |

|              |      |      |      |      |        |                                                                                                             |       |
|--------------|------|------|------|------|--------|-------------------------------------------------------------------------------------------------------------|-------|
| A_23_P21776  | -2.9 | 1.0  | 1.0  | 1.0  | SNAPC5 | small nuclear RNA activating complex, polypeptide 5, 19kDa [Source:HGNC Symbol;Acc:15484] [ENST00000316634] | 10302 |
| A_23_P19020  | -1.0 | -1.0 | -6.6 | -1.5 | SNCAIP | Homo sapiens synuclein, alpha interacting protein (SNCAIP), transcript variant 1, mRNA [NM_005460]          | 9627  |
| A_23_P121945 | 1.5  | 2.8  | 2.2  | -1.4 | SNCB   | Homo sapiens synuclein, beta (SNCB), transcript variant 1, mRNA [NM_001001502]                              | 6620  |

|              |      |      |      |      |        |                                                                                                                                                           |       |
|--------------|------|------|------|------|--------|-----------------------------------------------------------------------------------------------------------------------------------------------------------|-------|
| A_24_P610618 | -1.2 | -1.1 | 2.6  | -1.8 | SNF8   | SNF8,<br>ESCRT-II<br>complex<br>subunit,<br>homolog<br>( <i>S.<br/>cerevisiae</i> )<br>[Source:H<br>GNC<br>Symbol;Ac<br>c:17028]<br>[ENST0000<br>0504000] | 11267 |
| A_23_P74581  | 8.0  | 7.8  | 7.5  | 6.3  | SNHG12 | Homo<br>sapiens<br>small<br>nucleolar<br>RNA host<br>gene 12<br>(non-<br>protein<br>coding)<br>(SNHG12),<br>non-<br>coding<br>RNA<br>[NR_0241<br>27]      | 85028 |
| A_24_P902052 | -2.3 | -1.0 | -1.1 | -1.1 | SNHG13 | Homo<br>sapiens<br>small<br>nucleolar<br>RNA host<br>gene 13<br>(non-<br>protein<br>coding)<br>(SNHG13),<br>non-<br>coding<br>RNA<br>[NR_0240<br>31]      | 57291 |

|              |      |       |      |      |       |                                                                                                                             |       |
|--------------|------|-------|------|------|-------|-----------------------------------------------------------------------------------------------------------------------------|-------|
| A_23_P94579  | -2.6 | -13.2 | -1.0 | -1.1 | SNHG7 | Homo sapiens small nucleolar RNA host gene 7 (non-protein coding) (SNHG7), transcript variant 1, non-coding RNA [NR_003672] | 84973 |
| A_24_P352116 | -6.7 | -1.1  | -1.3 | -1.8 | SNHG7 | Homo sapiens small nucleolar RNA host gene 7 (non-protein coding) (SNHG7), transcript variant 1, non-coding RNA [NR_003672] | 84973 |
| A_23_P102706 | 1.9  | 4.8   | 2.0  | 1.2  | SNPH  | Homo sapiens syntaphilin (SNPH), mRNA [NM_014723]                                                                           | 9751  |

|              |       |      |      |      |         |                                                                                                                 |       |
|--------------|-------|------|------|------|---------|-----------------------------------------------------------------------------------------------------------------|-------|
| A_24_P936688 | -1.8  | -2.2 | -2.3 | -2.1 | SNRK    | Homo sapiens SNF related kinase (SNRK), transcript variant 1, mRNA [NM_017719]                                  | 54861 |
| A_24_P102151 | -17.1 | -1.0 | -1.6 | -1.1 | SNRK    | SNF related kinase [Source:HGNC Symbol;Acc:30598] [ENST00000462810]                                             | 54861 |
| A_23_P159101 | -2.8  | -1.2 | -3.1 | -1.2 | SNRNP35 | Homo sapiens small nuclear ribonucleo protein 35kDa (U11/U12) (SNRNP35), transcript variant 2, mRNA [NM_022717] | 11066 |

|              |      |      |      |      |         |                                                                                                                                                                 |       |
|--------------|------|------|------|------|---------|-----------------------------------------------------------------------------------------------------------------------------------------------------------------|-------|
| A_24_P922056 | -1.0 | -2.1 | -1.1 | -1.5 | SNRNP35 | small<br>nuclear<br>ribonucleo<br>protein<br>35kDa<br>(U11/U12)<br>[Source:H<br>GNC<br>Symbol;Ac<br>c:30852]<br>[ENST0000<br>0527158]                           | 11066 |
| A_23_P45913  | -1.1 | -2.2 | -1.4 | 1.0  | SNRNP40 | Homo<br>sapiens<br>small<br>nuclear<br>ribonucleo<br>protein<br>40kDa<br>(U5)<br>(SNRNP40)<br>, mRNA<br>[NM_0048<br>14]                                         | 9410  |
| A_23_P154675 | 1.2  | 1.1  | 1.3  | 2.7  | SNRPB   | Homo<br>sapiens<br>small<br>nuclear<br>ribonucleo<br>protein<br>polypeptid<br>es B and<br>B1<br>(SNRPB),<br>transcript<br>variant 1,<br>mRNA<br>[NM_1982<br>16] | 6628  |

|              |      |      |      |      |        |                                                                                                              |      |
|--------------|------|------|------|------|--------|--------------------------------------------------------------------------------------------------------------|------|
| A_24_P724040 | -1.3 | -1.4 | -2.6 | -1.2 | SNRPB2 | Homo sapiens small nuclear ribonucleo protein polypeptide B (SNRPB2), transcript variant 1, mRNA [NM_003092] | 6629 |
| A_24_P83922  | -1.3 | -4.7 | -1.5 | -1.3 | SNRPC  | Homo sapiens small nuclear ribonucleo protein polypeptide C (SNRPC), transcript variant 1, mRNA [NM_003093]  | 6631 |
| A_23_P132216 | -1.0 | -1.0 | 2.0  | 1.5  | SNRPD3 | Homo sapiens small nuclear ribonucleo protein D3 polypeptide 18kDa (SNRPD3), mRNA [NM_004175]                | 6634 |



|              |      |      |      |      |       |                                                                                                                        |      |
|--------------|------|------|------|------|-------|------------------------------------------------------------------------------------------------------------------------|------|
| A_23_P117068 | -1.3 | -1.1 | -4.7 | -1.2 | SNRPF | Homo sapiens small nuclear ribonucleo protein polypeptide F (SNRPF), mRNA [NM_003095]                                  | 6636 |
| A_23_P77066  | 1.5  | 2.3  | 1.4  | -1.0 | SNRPN | Homo sapiens small nuclear ribonucleo protein polypeptide N (SNRPN), transcript variant 4, mRNA [NM_022807]            | 6638 |
| A_23_P95029  | 1.0  | -2.7 | 1.0  | -1.0 | SNTB1 | Homo sapiens syntrophin, beta 1 (dystrophin-associated protein A1, 59kDa, basic component 1) (SNTB1), mRNA [NM_021021] | 6641 |

|              |      |      |      |      |       |                                                                                                                        |       |
|--------------|------|------|------|------|-------|------------------------------------------------------------------------------------------------------------------------|-------|
| A_23_P33444  | 1.1  | -3.8 | -1.0 | -1.0 | SNTB2 | Homo sapiens syntrophin, beta 2 (dystrophin-associated protein A1, 59kDa, basic component 2) (SNTB2), mRNA [NM_006750] | 6645  |
| A_32_P187704 | -1.2 | -1.3 | -1.3 | -2.4 | SNTG1 | syntrophin, gamma 1 [Source:HGNC Symbol;Acc:13740] [ENST00000521574]                                                   | 54212 |
| A_24_P347624 | 1.8  | 2.0  | -3.0 | 1.1  | SNURF | Homo sapiens SNRPN upstream reading frame (SNURF), transcript variant 2, mRNA [NM_022804]                              | 8926  |

|              |      |      |      |      |       |                                                                               |       |
|--------------|------|------|------|------|-------|-------------------------------------------------------------------------------|-------|
| A_23_P49033  | -2.0 | -2.0 | -2.1 | -2.1 | SNX1  | Homo sapiens sorting nexin 1 (SNX1), transcript variant 1, mRNA [NM_003099]   | 6642  |
| A_23_P89343  | -2.7 | -1.8 | -1.1 | -1.5 | SNX11 | Homo sapiens sorting nexin 11 (SNX11), transcript variant 1, mRNA [NM_152244] | 29916 |
| A_23_P10699  | -4.7 | -3.2 | -2.7 | -1.0 | SNX12 | sorting nexin 12 [Source:HGNC Symbol;Acc:14976] [ENST00000374274]             | 29934 |
| A_23_P256342 | -1.3 | -2.0 | -1.0 | -1.0 | SNX13 | Homo sapiens sorting nexin 13 (SNX13), mRNA [NM_015132]                       | 23161 |
| A_23_P259054 | 1.5  | 1.0  | -1.7 | -2.4 | SNX14 | Homo sapiens sorting nexin 14 (SNX14), transcript variant 1, mRNA [NM_153816] | 57231 |

|              |      |      |      |      |       |                                                                               |        |
|--------------|------|------|------|------|-------|-------------------------------------------------------------------------------|--------|
| A_24_P198217 | -1.5 | 2.8  | -1.4 | -1.3 | SNX15 | Homo sapiens sorting nexin 15 (SNX15), transcript variant B, mRNA [NM_147777] | 29907  |
| A_24_P320880 | -1.1 | -1.1 | -1.4 | -4.6 | SNX16 | Homo sapiens sorting nexin 16 (SNX16), transcript variant 1, mRNA [NM_022133] | 64089  |
| A_24_P81695  | 1.6  | 2.3  | 1.6  | 3.2  | SNX19 | Homo sapiens sorting nexin 19 (SNX19), mRNA [NM_014758]                       | 399979 |
| A_24_P81691  | 1.1  | 1.0  | 1.3  | 2.0  | SNX19 | Homo sapiens sorting nexin 19 (SNX19), mRNA [NM_014758]                       | 399979 |
| A_23_P352469 | -7.2 | -2.1 | -2.9 | -5.9 | SNX20 | Homo sapiens sorting nexin 20 (SNX20), transcript variant 2, mRNA [NM_153337] | 124460 |

|              |      |       |      |      |       |                                                                                                |        |
|--------------|------|-------|------|------|-------|------------------------------------------------------------------------------------------------|--------|
| A_24_P13831  | 1.0  | -3.7  | -2.9 | 1.5  | SNX20 | Homo sapiens sorting nexin 20 (SNX20), transcript variant 1, mRNA [NM_182854]                  | 124460 |
| A_23_P154585 | 1.4  | -12.9 | 1.6  | -1.1 | SNX21 | Homo sapiens sorting nexin family member 21 (SNX21), transcript variant 4, mRNA [NM_001042633] | 90203  |
| A_24_P375421 | 1.1  | -1.7  | 1.7  | -4.5 | SNX22 | Homo sapiens sorting nexin 22 (SNX22), mRNA [NM_024798]                                        | 79856  |
| A_23_P19095  | 13.2 | 11.7  | 12.1 | 13.0 | SNX24 | Homo sapiens sorting nexin 24 (SNX24), mRNA [NM_014035]                                        | 28966  |
| A_23_P367816 | 1.1  | 1.1   | -1.0 | -6.9 | SNX29 | Homo sapiens sorting nexin 29 (SNX29), mRNA [NM_032167]                                        | 92017  |

|              |      |      |      |      |       |                                                                             |        |
|--------------|------|------|------|------|-------|-----------------------------------------------------------------------------|--------|
| A_32_P66020  | 2.0  | 1.2  | 2.2  | -2.1 | SNX29 | Homo sapiens sorting nexin 29 (SNX29), mRNA [NM_032167]                     | 92017  |
| A_24_P277807 | -1.1 | -1.1 | -1.3 | 2.4  | SNX3  | Homo sapiens sorting nexin 3 (SNX3), transcript variant 1, mRNA [NM_003795] | 8724   |
| A_23_P351800 | 1.4  | 1.3  | -1.5 | -3.3 | SNX32 | sorting nexin 32 [Source:HGNC Symbol;Acc:26423] [ENST00000530101]           | 254122 |
| A_23_P254404 | -1.5 | -8.8 | -1.6 | -4.1 | SNX33 | Homo sapiens sorting nexin 33 (SNX33), mRNA [NM_153271]                     | 257364 |
| A_23_P131954 | 2.0  | 2.7  | 1.7  | 2.4  | SNX5  | Homo sapiens sorting nexin 5 (SNX5), transcript variant 2, mRNA [NM_014426] | 27131  |

|              |       |       |      |      |      |                                                                                                      |       |
|--------------|-------|-------|------|------|------|------------------------------------------------------------------------------------------------------|-------|
| A_23_P35066  | 1.2   | -1.0  | 2.1  | -1.6 | SNX7 | Homo sapiens sorting nexin 7 (SNX7), transcript variant 1, mRNA [NM_015976]                          | 51375 |
| A_23_P414252 | -1.2  | -11.1 | 1.3  | 1.0  | SNX8 | Homo sapiens cDNA, FLJ96764, highly similar to Homo sapiens sorting nexin 8 (SNX8), mRNA. [AK315670] | 29886 |
| A_23_P214789 | -11.2 | -2.2  | -2.1 | -1.2 | SNX9 | Homo sapiens sorting nexin 9 (SNX9), mRNA [NM_016224]                                                | 51429 |
| A_24_P179044 | 1.3   | 2.0   | 2.1  | -1.3 | SNX9 | Homo sapiens sorting nexin 9 (SNX9), mRNA [NM_016224]                                                | 51429 |

|              |      |      |      |      |       |                                                                                           |       |
|--------------|------|------|------|------|-------|-------------------------------------------------------------------------------------------|-------|
| A_32_P103131 | -1.0 | -2.4 | -1.2 | -1.1 | SOAT1 | sterol O-acyltransferase 1<br>[Source:HGNC Symbol;Acc:11177]<br>[ENST00000367619]         | 6646  |
| A_23_P156907 | -1.7 | -1.9 | -2.0 | -1.6 | SOBP  | Homo sapiens sine oculis binding protein homolog (Drosophila) (SOBP), mRNA<br>[NM_018013] | 55084 |
| A_23_P420196 | 2.1  | -1.1 | 1.2  | -1.0 | SOCS1 | Homo sapiens suppressor of cytokine signaling 1 (SOCS1), mRNA<br>[NM_003745]              | 8651  |
| A_23_P128215 | -1.0 | -1.0 | 2.2  | -1.0 | SOCS2 | Homo sapiens suppressor of cytokine signaling 2 (SOCS2), mRNA<br>[NM_003877]              | 8835  |



|              |      |      |      |      |       |                                                                                                 |        |
|--------------|------|------|------|------|-------|-------------------------------------------------------------------------------------------------|--------|
| A_23_P351069 | -3.6 | 1.9  | 1.2  | 1.3  | SOCS3 | Homo sapiens suppressor of cytokine signaling 3 (SOCS3), mRNA [NM_003955]                       | 9021   |
| A_23_P151700 | 2.3  | 1.5  | 1.6  | -1.6 | SOCS4 | Homo sapiens suppressor of cytokine signaling 4 (SOCS4), transcript variant 1, mRNA [NM_199421] | 122809 |
| A_32_P43711  | -1.3 | -1.5 | -4.1 | -4.6 | SOCS7 | Homo sapiens suppressor of cytokine signaling 7 (SOCS7), mRNA [NM_014598]                       | 30837  |
| A_24_P367211 | 1.7  | 2.4  | 2.2  | -1.0 | SOCS7 | Homo sapiens suppressor of cytokine signaling 7 (SOCS7), mRNA [NM_014598]                       | 30837  |

|              |      |      |      |      |        |                                                                                                         |       |
|--------------|------|------|------|------|--------|---------------------------------------------------------------------------------------------------------|-------|
| A_24_P193244 | 1.8  | -2.0 | 1.2  | 1.1  | SOHLH2 | Homo sapiens spermatogenesis and oogenesis specific basic helix-loop-helix 2 (SOHLH2), mRNA [NM_017826] | 54937 |
| A_24_P928639 | -3.3 | -1.1 | -1.2 | -1.2 | SOLH   | Homo sapiens small optic lobes homolog (Drosophila), mRNA (cDNA clone IMAGE:5518093). [BC032648]        | 6650  |
| A_23_P118113 | -2.8 | 1.0  | 1.1  | 1.0  | SOLH   | Homo sapiens small optic lobes homolog (Drosophila) (SOLH), mRNA [NM_005632]                            | 6650  |

|              |      |      |      |      |        |                                                                                                     |       |
|--------------|------|------|------|------|--------|-----------------------------------------------------------------------------------------------------|-------|
| A_24_P282210 | 2.1  | -1.5 | 1.3  | 1.7  | SOLH   | Homo sapiens small optic lobes homolog (Drosophila) (SOLH), mRNA [NM_005632]                        | 6650  |
| A_32_P36217  | 3.2  | 3.8  | 2.1  | 1.2  | SON    | Homo sapiens SON DNA binding protein (SON), transcript variant f, mRNA [NM_138927]                  | 6651  |
| A_23_P402733 | -1.1 | 2.1  | 1.2  | 2.8  | SON    | Homo sapiens SON DNA binding protein (SON), transcript variant b, mRNA [NM_032195]                  | 6651  |
| A_24_P326511 | -1.0 | -2.4 | -1.1 | -1.1 | SORBS1 | Homo sapiens sorbin and SH3 domain containing 1 (SORBS1), transcript variant 3, mRNA [NM_001034954] | 10580 |

|              |      |     |      |     |         |                                                                               |       |
|--------------|------|-----|------|-----|---------|-------------------------------------------------------------------------------|-------|
| A_24_P325520 | -1.6 | 1.4 | 2.5  | 1.0 | SORT1   | Homo sapiens sortilin 1 (SORT1), transcript variant 1, mRNA [NM_002959]       | 6272  |
| A_23_P343808 | 4.9  | 1.0 | -2.1 | 1.1 | SOS1    | Homo sapiens son of sevenless homolog 1 (Drosophila) (SOS1), mRNA [NM_005633] | 6654  |
| A_23_P117546 | 2.4  | 2.4 | 1.0  | 1.7 | SOS2    | Homo sapiens son of sevenless homolog 2 (Drosophila) (SOS2), mRNA [NM_006939] | 6655  |
| A_23_P145841 | 2.8  | 2.5 | 5.0  | 2.5 | SOSTDC1 | Homo sapiens sclerostin domain containing 1 (SOSTDC1), mRNA [NM_015464]       | 25928 |

|              |      |       |      |      |       |                                                                              |      |
|--------------|------|-------|------|------|-------|------------------------------------------------------------------------------|------|
| A_24_P108784 | 1.1  | -25.6 | 1.4  | -1.0 | SOX10 | Homo sapiens SRY (sex determining region Y)-box 10 (SOX10), mRNA [NM_006941] | 6663 |
| A_23_P22378  | -6.5 | -3.2  | -3.3 | -3.2 | SOX11 | Homo sapiens SRY (sex determining region Y)-box 11 (SOX11), mRNA [NM_003108] | 6664 |
| A_24_P156267 | 1.0  | -2.5  | 1.0  | 1.4  | SOX12 | Homo sapiens SRY (sex determining region Y)-box 12 (SOX12), mRNA [NM_006943] | 6666 |
| A_23_P85703  | -1.0 | -4.4  | -3.0 | -1.0 | SOX13 | Homo sapiens SRY (sex determining region Y)-box 13 (SOX13), mRNA [NM_005686] | 9580 |

|              |      |      |      |      |       |                                                                              |       |
|--------------|------|------|------|------|-------|------------------------------------------------------------------------------|-------|
| A_23_P80662  | 4.5  | 3.7  | 4.9  | 3.5  | SOX14 | Homo sapiens SRY (sex determining region Y)-box 14 (SOX14), mRNA [NM_004189] | 8403  |
| A_24_P46946  | -1.0 | 1.3  | -1.4 | 3.2  | SOX17 | Homo sapiens SRY (sex determining region Y)-box 17 (SOX17), mRNA [NM_022454] | 64321 |
| A_23_P255418 | 20.2 | 25.7 | 55.0 | 22.8 | SOX18 | Homo sapiens SRY (sex determining region Y)-box 18 (SOX18), mRNA [NM_018419] | 54345 |
| A_23_P379089 | -1.4 | -1.7 | -2.4 | -3.4 | SOX21 | Homo sapiens SRY (sex determining region Y)-box 21 (SOX21), mRNA [NM_007084] | 11166 |

|              |      |      |      |      |         |                                                                                                     |        |
|--------------|------|------|------|------|---------|-----------------------------------------------------------------------------------------------------|--------|
| A_24_P756289 | 1.1  | -2.2 | -1.1 | 1.0  | SOX2-OT | Homo sapiens SOX2 overlapping transcript (non-protein coding) (SOX2-OT), non-coding RNA [NR_004053] | 347689 |
| A_24_P113725 | 2.2  | 2.3  | 1.2  | -1.4 | SOX3    | Homo sapiens SRY (sex determining region Y)-box 3 (SOX3), mRNA [NM_005634]                          | 6658   |
| A_24_P911676 | -3.8 | -1.6 | -2.6 | 1.5  | SOX4    | Homo sapiens SRY (sex determining region Y)-box 4 (SOX4), mRNA [NM_003107]                          | 6659   |
| A_23_P82169  | 2.6  | 2.1  | 2.5  | 2.9  | SOX4    | Homo sapiens SRY (sex determining region Y)-box 4 (SOX4), mRNA [NM_003107]                          | 6659   |

|              |      |      |      |      |      |                                                                                                  |       |
|--------------|------|------|------|------|------|--------------------------------------------------------------------------------------------------|-------|
| A_24_P27234  | 2.3  | -1.6 | 1.3  | 1.9  | SOX5 | Homo sapiens SRY (sex determining region Y)-box 5 (SOX5), transcript variant 2, mRNA [NM_152989] | 6660  |
| A_23_P87952  | 1.4  | 2.3  | -1.0 | -1.1 | SOX5 | Homo sapiens SRY (sex determining region Y)-box 5 (SOX5), transcript variant 2, mRNA [NM_152989] | 6660  |
| A_23_P169738 | 1.1  | -8.3 | 1.1  | 1.5  | SOX7 | Homo sapiens SRY (sex determining region Y)-box 7 (SOX7), mRNA [NM_031439]                       | 83595 |
| A_24_P226782 | -9.2 | 1.6  | -1.4 | -1.2 | SOX7 | Homo sapiens SRY (sex determining region Y)-box 7 (SOX7), mRNA [NM_031439]                       | 83595 |



|              |       |      |      |       |       |                                                                                       |       |
|--------------|-------|------|------|-------|-------|---------------------------------------------------------------------------------------|-------|
| A_24_P65292  | 3.5   | 2.8  | 1.5  | 3.1   | SOX8  | Homo sapiens SRY (sex determining region Y)-box 8 (SOX8), mRNA [NM_014587]            | 30812 |
| A_23_P66137  | 2.2   | 1.3  | 2.1  | 1.6   | SOX8  | Homo sapiens SRY (sex determining region Y)-box 8 (SOX8), mRNA [NM_014587]            | 30812 |
| A_23_P209712 | -22.4 | -1.0 | -1.1 | -1.3  | SP100 | Homo sapiens SP100 nuclear antigen (SP100), transcript variant 1, mRNA [NM_001080391] | 6672  |
| A_23_P349928 | 1.7   | 1.7  | 1.5  | -14.4 | SP100 | Homo sapiens SP100 nuclear antigen (SP100), transcript variant 2, mRNA [NM_003113]    | 6672  |

|              |      |      |      |      |       |                                                                                                  |       |
|--------------|------|------|------|------|-------|--------------------------------------------------------------------------------------------------|-------|
| A_23_P209726 | -1.7 | -2.0 | 1.0  | -1.4 | SP140 | Homo sapiens SP140 nuclear body protein (SP140), transcript variant 1, mRNA [NM_007237]          | 11262 |
| A_24_P328504 | -1.1 | -2.2 | -1.2 | -2.7 | SP140 | Homo sapiens SP140 nuclear body protein (SP140), transcript variant 1, mRNA [NM_007237]          | 11262 |
| A_24_P256526 | 2.3  | 1.1  | -1.1 | 1.0  | SP2   | Homo sapiens Sp2 transcription factor, mRNA (cDNA clone IMAGE:4095335), complete cds. [BC005914] | 6668  |
| A_23_P381449 | -1.0 | -1.6 | -3.3 | -1.9 | SP2   | Homo sapiens Sp2 transcription factor (SP2), mRNA [NM_003110]                                    | 6668  |

|              |       |      |      |      |     |                                                                                     |        |
|--------------|-------|------|------|------|-----|-------------------------------------------------------------------------------------|--------|
| A_23_P347198 | 116.7 | 59.3 | 51.7 | 32.4 | SP3 | Homo sapiens Sp3 transcription factor (SP3), transcript variant 1, mRNA [NM_003111] | 6670   |
| A_23_P71064  | 1.1   | -4.4 | 1.0  | -1.0 | SP4 | Homo sapiens Sp4 transcription factor (SP4), mRNA [NM_003112]                       | 6671   |
| A_32_P74615  | 1.9   | 2.1  | -1.7 | -1.9 | SP5 | Homo sapiens Sp5 transcription factor (SP5), mRNA [NM_001003845]                    | 389058 |
| A_23_P317729 | -5.2  | 1.1  | -1.0 | -1.0 | SP7 | Homo sapiens Sp7 transcription factor (SP7), transcript variant 2, mRNA [NM_152860] | 121340 |

|              |     |      |      |      |         |                                                                                             |        |
|--------------|-----|------|------|------|---------|---------------------------------------------------------------------------------------------|--------|
| A_24_P276385 | 5.9 | 3.4  | 6.3  | 1.6  | SPACA5  | Homo sapiens sperm acrosome associated 5 (SPACA5), mRNA [NM_205856]                         | 389852 |
| A_23_P425116 | 1.5 | 1.5  | -3.6 | 1.0  | SPAG11B | Homo sapiens sperm associated antigen 11B (SPAG11B), transcript variant A, mRNA [NM_016512] | 10407  |
| A_24_P332043 | 1.6 | -1.1 | 2.7  | -1.6 | SPAG17  | Homo sapiens sperm associated antigen 17 (SPAG17), mRNA [NM_206996]                         | 200162 |
| A_23_P89509  | 2.2 | 2.2  | 1.6  | 1.1  | SPAG5   | Homo sapiens sperm associated antigen 5 (SPAG5), mRNA [NM_006461]                           | 10615  |

|              |      |      |      |      |           |                                                                                                 |           |
|--------------|------|------|------|------|-----------|-------------------------------------------------------------------------------------------------|-----------|
| A_24_P700052 | -1.3 | -1.4 | -2.1 | -2.1 | SPAG5-AS1 | Homo sapiens SPAG5 antisense RNA 1 (non-protein coding) (SPAG5-AS1), non-coding RNA [NR_040012] | 100506436 |
| A_24_P412036 | 1.0  | -2.6 | -1.1 | -1.1 | SPAG8     | Homo sapiens sperm associated antigen 8 (SPAG8), transcript variant 2, mRNA [NM_172312]         | 26206     |
| A_24_P365025 | 2.3  | 3.1  | 3.6  | 1.1  | SPAG9     | Homo sapiens sperm associated antigen 9 (SPAG9), transcript variant 3, mRNA [NM_003971]         | 9043      |

|              |     |      |      |      |         |                                                                                                                                      |        |
|--------------|-----|------|------|------|---------|--------------------------------------------------------------------------------------------------------------------------------------|--------|
| A_23_P111826 | 2.1 | -2.6 | -2.7 | -1.1 | SPAM1   | Homo sapiens sperm adhesion molecule 1 (PH-20 hyaluronidase, zona pellucida binding) (SPAM1), transcript variant 2, mRNA [NM_153189] | 6677   |
| A_32_P219660 | 1.0 | -3.0 | -1.0 | -1.0 | SPANXA1 | Homo sapiens sperm protein associated with the nucleus, X-linked, family member A1 (SPANXA1), mRNA [NM_013453]                       | 30014  |
| A_24_P91830  | 3.9 | 2.2  | 2.0  | 2.2  | SPANXN3 | Homo sapiens SPANX family, member N3 (SPANXN3), mRNA [NM_00109609]                                                                   | 139067 |

|              |      |      |      |      |         |                                                                                      |        |
|--------------|------|------|------|------|---------|--------------------------------------------------------------------------------------|--------|
| A_23_P209356 | 1.0  | 1.0  | -1.0 | -3.6 | SPAST   | Homo sapiens spastin (SPAST), transcript variant 1, mRNA [NM_014946]                 | 6683   |
| A_24_P220472 | 2.4  | 1.0  | 1.6  | 1.1  | SPATA12 | Homo sapiens spermatogenesis associated 12 (SPATA12), mRNA [NM_181727]               | 353324 |
| A_23_P6722   | 1.4  | -1.7 | -2.1 | -2.4 | SPATA16 | Homo sapiens spermatogenesis associated 16 (SPATA16), mRNA [NM_031955]               | 83893  |
| A_32_P216841 | -5.6 | 1.0  | -1.1 | -1.3 | SPATA18 | Homo sapiens spermatogenesis associated 18 homolog (rat) (SPATA18), mRNA [NM_145263] | 132671 |

|              |     |      |      |      |          |                                                                                                                                 |        |
|--------------|-----|------|------|------|----------|---------------------------------------------------------------------------------------------------------------------------------|--------|
| A_23_P118633 | 1.5 | 3.9  | -2.8 | 1.8  | SPATA20  | Homo sapiens spermatogenesis associated 20 (SPATA20), mRNA [NM_022827]                                                          | 64847  |
| A_23_P329956 | 1.0 | 1.8  | 1.4  | -2.2 | SPATA3   | Homo sapiens spermatogenesis associated 3 (SPATA3), mRNA [NM_139073]                                                            | 130560 |
| A_24_P922252 | 2.2 | -1.1 | -1.1 | 2.7  | SPATA5L1 | Homo sapiens cDNA FLJ12286 fis, clone MAMMA1001768, weakly similar to CELL DIVISION CYCLE PROTEIN 48 HOMOLOG MJ1156. [AK022348] | 79029  |



|              |       |      |      |      |         |                                                                                                                |        |
|--------------|-------|------|------|------|---------|----------------------------------------------------------------------------------------------------------------|--------|
| A_32_P217390 | -19.6 | 1.0  | 1.0  | -1.0 | SPATA8  | Homo sapiens spermatogenesis associated 8 (SPATA8), mRNA [NM_173499]                                           | 145946 |
| A_23_P390576 | -33.8 | -1.2 | -1.3 | -1.4 | SPATA9  | spermatogenesis associated 9 [Source:HGNC Symbol;Acc:22988] [ENST00000316087]                                  | 83890  |
| A_23_P99303  | 1.0   | 2.3  | 3.8  | 2.3  | SPATS2  | Homo sapiens spermatogenesis associated , serine-rich 2 (SPATS2), mRNA [NM_023071]                             | 65244  |
| A_23_P131255 | 1.1   | -4.7 | 1.1  | 1.0  | SPATS2L | Homo sapiens spermatogenesis associated , serine-rich 2-like (SPATS2L), transcript variant 1, mRNA [NM_015535] | 26010  |

|              |     |      |      |      |        |                                                                                                   |        |
|--------------|-----|------|------|------|--------|---------------------------------------------------------------------------------------------------|--------|
| A_23_P425579 | 1.3 | 1.2  | -3.4 | -1.2 | SPDYA  | Homo sapiens speedy homolog A (Xenopus laevis) (SPDYA), transcript variant 2, mRNA [NM_001008779] | 245711 |
| A_23_P425967 | 1.1 | -1.0 | -1.0 | -4.0 | SPDYE1 | Homo sapiens speedy homolog E1 (Xenopus laevis) (SPDYE1), mRNA [NM_175064]                        | 285955 |
| A_24_P178396 | 2.1 | 1.3  | 1.3  | -1.4 | SPDYE2 | Homo sapiens speedy homolog E2 (Xenopus laevis) (SPDYE2), mRNA [NM_001031618]                     | 441273 |
| A_32_P222079 | 1.7 | 1.0  | -1.1 | -2.5 | SPDYE2 | Homo sapiens speedy homolog E2 (Xenopus laevis) (SPDYE2), mRNA [NM_001031618]                     | 441273 |

|              |      |      |      |      |        |                                                                               |        |
|--------------|------|------|------|------|--------|-------------------------------------------------------------------------------|--------|
| A_24_P100846 | -3.1 | -1.2 | -1.9 | -2.9 | SPDYE3 | Homo sapiens speedy homolog E3 (Xenopus laevis) (SPDYE3), mRNA [NM_001004351] | 441272 |
| A_32_P122529 | 1.4  | 2.1  | 1.9  | -1.5 | SPDYE3 | Homo sapiens speedy homolog E3 (Xenopus laevis) (SPDYE3), mRNA [NM_001004351] | 441272 |
| A_32_P205323 | 1.1  | 1.0  | -2.1 | 1.1  | SPDYE3 | Homo sapiens speedy homolog E3 (Xenopus laevis) (SPDYE3), mRNA [NM_001004351] | 441272 |
| A_24_P333136 | -1.2 | 1.2  | -1.8 | -5.0 | SPDYE3 | Homo sapiens speedy homolog E3 (Xenopus laevis) (SPDYE3), mRNA [NM_001004351] | 441272 |

|              |      |      |     |      |         |                                                                                                   |        |
|--------------|------|------|-----|------|---------|---------------------------------------------------------------------------------------------------|--------|
| A_32_P107667 | -5.1 | 3.0  | 1.9 | 1.0  | SPDYE3  | Homo sapiens speedy homolog E3 (Xenopus laevis) (SPDYE3), mRNA [NM_001004351]                     | 441272 |
| A_24_P255986 | -1.0 | 2.2  | 1.4 | -1.0 | SPDYE4  | Homo sapiens speedy homolog E4 (Xenopus laevis) (SPDYE4), mRNA [NM_001128076]                     | 388333 |
| A_32_P88817  | -2.1 | -2.5 | 1.4 | 1.6  | SPDYE7P | Homo sapiens speedy homolog E7 (Xenopus laevis), pseudogene (SPDYE7P), non-coding RNA [NR_003666] | 441251 |

|              |      |      |      |      |         |                                                                                                                                 |        |
|--------------|------|------|------|------|---------|---------------------------------------------------------------------------------------------------------------------------------|--------|
| A_32_P202182 | 1.0  | -8.7 | 1.0  | 1.0  | SPDYE8P | Homo sapiens speedy homolog E8 (Xenopus laevis), pseudogene (SPDYE8P), non-coding RNA [NR_003664]                               | 389517 |
| A_24_P943095 | -7.1 | -1.3 | -1.3 | -1.4 | SPECC1  | Homo sapiens sperm antigen with calponin homology and coiled-coil domains 1 (SPECC1), transcript variant 1, mRNA [NM_001033553] | 92521  |
| A_24_P927444 | -3.7 | -1.4 | 2.0  | 1.0  | SPECC1  | Homo sapiens sperm antigen with calponin homology and coiled-coil domains 1 (SPECC1), transcript variant 3, mRNA [NM_152904]    | 92521  |

|              |     |      |       |      |         |                                                                                                                                    |        |
|--------------|-----|------|-------|------|---------|------------------------------------------------------------------------------------------------------------------------------------|--------|
| A_32_P203515 | 1.1 | 1.1  | -10.2 | 1.1  | SPECC1L | Homo sapiens sperm antigen with calponin homology and coiled-coil domains 1-like (SPECC1L), transcript variant 1, mRNA [NM_015330] | 23384  |
| A_23_P40280  | 3.2 | 1.4  | -1.3  | 1.4  | SPEF1   | Homo sapiens sperm flagellar 1 (SPEF1), mRNA [NM_015417]                                                                           | 25876  |
| A_32_P303449 | 1.0 | -2.3 | 1.1   | -1.2 | SPEM1   | Homo sapiens spermatid maturation 1 (SPEM1), mRNA [NM_199339]                                                                      | 374768 |
| A_24_P67189  | 2.4 | 1.4  | 3.5   | 2.7  | SPEM1   | spermatid maturation 1 [Source:HGNC Symbol;Acc:32429] [ENST00000323383]                                                            | 374768 |

|              |     |     |     |      |      |                                                                                                                                                                          |      |
|--------------|-----|-----|-----|------|------|--------------------------------------------------------------------------------------------------------------------------------------------------------------------------|------|
| A_23_P3627   | 2.4 | 1.7 | 2.1 | 1.6  | SPG7 | Homo sapiens spastic paraplegia 7 (pure and complicated autosomal recessive) (SPG7), nuclear gene encoding mitochondrial protein, transcript variant 1, mRNA [NM_003119] | 6687 |
| A_24_P205120 | 2.8 | 2.0 | 1.1 | -1.2 | SPG7 | Homo sapiens spastic paraplegia 7 (pure and complicated autosomal recessive) (SPG7), nuclear gene encoding mitochondrial protein, transcript variant 2, mRNA [NM_199367] | 6687 |

|              |      |     |     |      |       |                                                                                                                                  |       |
|--------------|------|-----|-----|------|-------|----------------------------------------------------------------------------------------------------------------------------------|-------|
| A_23_P303181 | 1.0  | 1.5 | 1.6 | -4.8 | SPHK2 | Homo sapiens sphingosine kinase 2 (SPHK2), transcript variant 1, mRNA [NM_020126]                                                | 56848 |
| A_23_P115998 | 3.6  | 3.6 | 2.6 | 3.5  | SPI1  | Homo sapiens spleen focus forming virus (SFFV) proviral integration oncogene spi1 (SPI1), transcript variant 2, mRNA [NM_003120] | 6688  |
| A_23_P27668  | -1.7 | 1.1 | 2.4 | 1.3  | SPIB  | Homo sapiens Spi-B transcription factor (Spi-1/PU.1 related) (SPIB), transcript variant 1, mRNA [NM_003121]                      | 6689  |



|              |      |      |     |      |        |                                                                                             |        |
|--------------|------|------|-----|------|--------|---------------------------------------------------------------------------------------------|--------|
| A_32_P148275 | 1.8  | 2.5  | 1.6 | 1.3  | SPIC   | Homo sapiens Spi-C transcription factor (Spi-1/PU.1 related) (SPIC), mRNA [NM_152323]       | 121599 |
| A_23_P109733 | -2.6 | 2.6  | 2.5 | 1.4  | SPICE1 | Homo sapiens spindle and centriole associated protein 1 (SPICE1), mRNA [NM_144718]          | 152185 |
| A_23_P125553 | 1.8  | -2.1 | 1.1 | -1.4 | SPIN2B | Homo sapiens spindlin family, member 2B (SPIN2B), transcript variant 3, mRNA [NM_001006683] | 474343 |
| A_24_P194508 | 1.5  | -2.6 | 1.7 | 1.0  | SPIN2B | Homo sapiens spindlin family, member 2B (SPIN2B), transcript variant 3, mRNA [NM_001006683] | 474343 |

|              |       |      |      |      |            |                                                                                                        |           |
|--------------|-------|------|------|------|------------|--------------------------------------------------------------------------------------------------------|-----------|
| A_32_P222961 | -1.0  | -1.3 | -1.0 | -2.7 | SPIN4      | Homo sapiens spindlin family, member 4 (SPIN4), mRNA [NM_001012968]                                    | 139886    |
| A_23_P71880  | 2.4   | -2.6 | 2.2  | 1.6  | SPINK4     | Homo sapiens serine peptidase inhibitor, Kazal type 4 (SPINK4), mRNA [NM_014471]                       | 27290     |
| A_23_P356494 | -11.0 | -1.0 | 1.0  | -2.2 | SPINK5     | Homo sapiens serine peptidase inhibitor, Kazal type 5 (SPINK5), transcript variant 2, mRNA [NM_006846] | 11005     |
| A_23_P210503 | 1.5   | 1.4  | -3.4 | 1.0  | SPINLW1-WF | Homo sapiens SPINLW1-WFDC6 readthrough (SPINLW1-WFDC6), mRNA [NM_001198986]                            | 100526773 |

|              |     |      |     |      |       |                                                                                              |        |
|--------------|-----|------|-----|------|-------|----------------------------------------------------------------------------------------------|--------|
| A_23_P433760 | 1.3 | -2.0 | 1.5 | -1.7 | SPN   | Homo sapiens sialophorin (SPN), transcript variant 1, mRNA [NM_001030288]                    | 6693   |
| A_23_P433758 | 3.1 | 1.7  | 2.3 | 3.6  | SPN   | Homo sapiens sialophorin (SPN), transcript variant 1, mRNA [NM_001030288]                    | 6693   |
| A_24_P339153 | 1.6 | 2.5  | 1.6 | 2.1  | SPNS1 | Homo sapiens spinster homolog 1 (Drosophila) (SPNS1), transcript variant 1, mRNA [NM_032038] | 83985  |
| A_24_P230173 | 1.4 | 2.8  | 1.5 | 2.8  | SPNS2 | Homo sapiens spinster homolog 2 (Drosophila) (SPNS2), mRNA [NM_001124758]                    | 124976 |

|              |      |      |      |      |        |                                                                                                                                        |        |
|--------------|------|------|------|------|--------|----------------------------------------------------------------------------------------------------------------------------------------|--------|
| A_23_P100963 | -1.8 | -1.0 | -2.7 | -1.4 | SPNS3  | Homo sapiens spinster homolog 3 (Drosophila) (SPNS3), mRNA [NM_182538]                                                                 | 201305 |
| A_23_P166027 | 1.7  | 1.7  | 1.7  | -4.6 | SPO11  | Homo sapiens SPO11 meiotic protein covalently bound to DSB homolog (S. cerevisiae) (SPO11), transcript variant 1, mRNA [NM_012444]     | 23626  |
| A_23_P161280 | 4.6  | 3.1  | 6.0  | 2.5  | SPOCK2 | Homo sapiens sparc/osteonectin, cwcv and kazal-like domains proteoglycan (testican) 2 (SPOCK2), transcript variant 2, mRNA [NM_014767] | 9806   |

|              |      |      |      |      |        |                                                                                                   |       |
|--------------|------|------|------|------|--------|---------------------------------------------------------------------------------------------------|-------|
| A_24_P270890 | -1.0 | -2.1 | -3.7 | -1.0 | SPOP   | Homo sapiens speckle-type POZ protein (SPOP), transcript variant 1, mRNA [NM_001007226]           | 8405  |
| A_23_P107257 | 4.5  | 6.3  | 4.5  | 2.9  | SPOP   | Homo sapiens speckle-type POZ protein (SPOP), transcript variant 1, mRNA [NM_001007226]           | 8405  |
| A_23_P79066  | -1.1 | -1.5 | -2.9 | -5.2 | SPPL2B | Homo sapiens signal peptide peptidase-like 2B (SPPL2B), transcript variant 3, mRNA [NM_001077238] | 56928 |
| A_32_P161447 | 1.3  | -2.8 | -1.1 | 1.1  | SPPL2B | Homo sapiens signal peptide peptidase-like 2B (SPPL2B), transcript variant 3, mRNA [NM_001077238] | 56928 |

|              |     |      |      |      |       |                                                                             |        |
|--------------|-----|------|------|------|-------|-----------------------------------------------------------------------------|--------|
| A_24_P136838 | 1.1 | -2.7 | -1.1 | -1.0 | SPPL3 | Homo sapiens mRNA; cDNA DKFZp547P1310 (from clone DKFZp547P1310) [AL834399] | 121665 |
| A_23_P427622 | 1.1 | 1.0  | 2.1  | -1.0 | SPPL3 | Homo sapiens signal peptide peptidase-like 3 (SPPL3), mRNA [NM_139015]      | 121665 |
| A_24_P299308 | 5.8 | 5.8  | 1.8  | 4.8  | SPPL3 | Homo sapiens cDNA FLJ39830 fis, clone SPLEN2012846. [AK097149]              | 121665 |
| A_23_P162559 | 2.5 | 1.8  | 2.3  | 2.2  | SPPL3 | Homo sapiens signal peptide peptidase-like 3 (SPPL3), mRNA [NM_139015]      | 121665 |

|              |     |      |     |      |        |                                                                                                         |        |
|--------------|-----|------|-----|------|--------|---------------------------------------------------------------------------------------------------------|--------|
| A_23_P68211  | 1.1 | 3.3  | 1.0 | 1.0  | SPR    | Homo sapiens sepiapterin reductase (7,8-dihydrobiopterin:NA DP+ oxidoreductase) (SPR), mRNA [NM_003124] | 6697   |
| A_32_P225854 | 1.0 | -1.0 | 4.2 | -1.0 | SPRED2 | Homo sapiens sprouty-related, EVH1 domain containing 2 (SPRED2), transcript variant 1, mRNA [NM_181784] | 200734 |
| A_24_P930415 | 2.0 | 2.0  | 2.1 | 1.1  | SPRN   | Homo sapiens shadow of prion protein homolog (zebrafish) (SPRN), mRNA [NM_001012508]                    | 503542 |

|              |      |     |      |      |        |                                                                          |       |
|--------------|------|-----|------|------|--------|--------------------------------------------------------------------------|-------|
| A_23_P159406 | 3.0  | 3.5 | 1.4  | 1.9  | SPRR1B | Homo sapiens small proline-rich protein 1B (SPRR1B), mRNA [NM_003125]    | 6699  |
| A_23_P11644  | -3.7 | 1.6 | -1.1 | -1.5 | SPRR2D | Homo sapiens small proline-rich protein 2D (SPRR2D), mRNA [NM_006945]    | 6703  |
| A_23_P148949 | 8.7  | 3.4 | 1.9  | 4.4  | SPRR2E | Homo sapiens small proline-rich protein 2E (SPRR2E), mRNA [NM_001024209] | 6704  |
| A_23_P311010 | -2.9 | 1.0 | 1.9  | 1.1  | SPRY3  | Homo sapiens sprouty homolog 3 (Drosophila) (SPRY3), mRNA [NM_005840]    | 10251 |



|              |      |      |      |     |        |                                                                                                |       |
|--------------|------|------|------|-----|--------|------------------------------------------------------------------------------------------------|-------|
| A_23_P65129  | -1.5 | -4.3 | -7.4 | 1.3 | SPRYD3 | Homo sapiens SPRY domain containing 3 (SPRYD3), mRNA [NM_032840]                               | 84926 |
| A_24_P116233 | -2.1 | 1.1  | 1.0  | 1.8 | SPRYD7 | Homo sapiens SPRY domain containing 7 (SPRYD7), transcript variant 1, mRNA [NM_020456]         | 57213 |
| A_23_P200096 | 2.3  | 2.6  | 1.6  | 2.1 | SPSB1  | Homo sapiens splA/ryandine receptor domain and SOCS box containing 1 (SPSB1), mRNA [NM_025106] | 80176 |

|              |      |      |      |      |       |                                                                                                                      |       |
|--------------|------|------|------|------|-------|----------------------------------------------------------------------------------------------------------------------|-------|
| A_23_P151098 | -2.9 | -1.1 | 1.3  | 1.6  | SPSB2 | Homo sapiens splA/ryandine receptor domain and SOCS box containing 2 (SPSB2), transcript variant 1, mRNA [NM_032641] | 84727 |
| A_23_P3496   | -4.2 | 1.0  | -1.3 | -1.4 | SPSB3 | Homo sapiens splA/ryandine receptor domain and SOCS box containing 3 (SPSB3), mRNA [NM_080861]                       | 90864 |
| A_23_P330537 | 2.2  | 1.3  | 1.5  | 1.0  | SPSB3 | Homo sapiens splA/ryandine receptor domain and SOCS box containing 3 (SPSB3), mRNA [NM_080861]                       | 90864 |

|              |      |      |     |      |        |                                                                                                  |       |
|--------------|------|------|-----|------|--------|--------------------------------------------------------------------------------------------------|-------|
| A_23_P258381 | 7.5  | 4.4  | 1.1 | -5.7 | SPSB4  | Homo sapiens splA/ryandine receptor domain and SOCS box containing 4 (SPSB4), mRNA [NM_080862]   | 92369 |
| A_32_P134968 | -1.4 | -3.7 | 1.2 | -1.9 | SPTB   | Homo sapiens spectrin, beta, erythrocytic (SPTB), transcript variant 1, mRNA [NM_001024858]      | 6710  |
| A_23_P339095 | 1.0  | 1.0  | 1.0 | -3.3 | SPTBN1 | Homo sapiens spectrin, beta, non-erythrocytic 1 (SPTBN1), transcript variant 2, mRNA [NM_178313] | 6711  |
| A_23_P102523 | 4.5  | 2.5  | 4.1 | 3.6  | SPTBN1 | Homo sapiens spectrin, beta, non-erythrocytic 1 (SPTBN1), transcript variant 1, mRNA [NM_003128] | 6711  |

|              |     |     |      |      |        |                                                                                                       |       |
|--------------|-----|-----|------|------|--------|-------------------------------------------------------------------------------------------------------|-------|
| A_23_P98282  | 2.3 | 2.2 | 1.0  | 1.1  | SPTBN2 | Homo sapiens spectrin, beta, non-erythrocytic 2 (SPTBN2), mRNA [NM_006946]                            | 6712  |
| A_24_P293114 | 2.5 | 1.5 | 3.0  | 1.7  | SPTBN4 | Homo sapiens spectrin, beta, non-erythrocytic 4 (SPTBN4), transcript variant sigma1, mRNA [NM_020971] | 57731 |
| A_24_P238420 | 1.9 | 1.9 | 2.7  | 1.0  | SPTBN4 | Homo sapiens spectrin, beta, non-erythrocytic 4 (SPTBN4), transcript variant sigma5, mRNA [NM_025213] | 57731 |
| A_23_P152082 | 1.7 | 1.2 | -6.0 | -1.2 | SPTBN5 | Homo sapiens spectrin, beta, non-erythrocytic 5 (SPTBN5), mRNA [NM_016642]                            | 51332 |

|              |       |      |      |      |        |                                                                                                         |       |
|--------------|-------|------|------|------|--------|---------------------------------------------------------------------------------------------------------|-------|
| A_24_P150486 | -3.6  | 1.6  | 1.0  | -2.0 | SPTLC2 | Homo sapiens serine palmitoyltransferase, long chain base subunit 2 (SPTLC2), mRNA [NM_004863]          | 9517  |
| A_24_P202857 | 1.6   | -2.6 | -2.6 | -1.4 | SPTLC3 | serine palmitoyltransferase, long chain base subunit 3 [Source:HGNC Symbol;Acc:16253] [ENST00000476791] | 55304 |
| A_24_P49260  | -13.8 | 1.0  | 1.0  | 1.1  | SPTLC3 | Homo sapiens serine palmitoyltransferase, long chain base subunit 3 (SPTLC3), mRNA [NM_018327]          | 55304 |

|              |      |      |      |      |        |                                                                                                |        |
|--------------|------|------|------|------|--------|------------------------------------------------------------------------------------------------|--------|
| A_24_P40721  | 1.3  | 1.3  | 2.1  | 1.6  | SPTLC3 | Homo sapiens serine palmitoyltransferase, long chain base subunit 3 (SPTLC3), mRNA [NM_018327] | 55304  |
| A_32_P199551 | -3.7 | -2.4 | -3.5 | 1.1  | SPTSSB | Homo sapiens serine palmitoyltransferase, small subunit B (SPTSSB), mRNA [NM_001040100]        | 165679 |
| A_24_P20753  | -2.2 | 1.1  | -1.0 | -1.2 | SRA1   | Homo sapiens steroid receptor RNA activator 1 (SRA1), mRNA [NM_001035235]                      | 10011  |
| A_23_P394917 | -1.0 | 2.5  | -1.1 | -1.0 | SRCAP  | Homo sapiens Snf2-related CREBBP activator protein (SRCAP), mRNA [NM_006662]                   | 10847  |

|              |      |      |      |      |         |                                                                                                                                              |        |
|--------------|------|------|------|------|---------|----------------------------------------------------------------------------------------------------------------------------------------------|--------|
| A_24_P248083 | 3.9  | 3.9  | 1.9  | 6.0  | SRCIN1  | Homo sapiens SNAP25-interacting protein, mRNA (cDNA clone IMAGE:5423326), complete cds. [BC033233]                                           | 80725  |
| A_23_P8571   | 2.1  | 5.0  | 1.6  | 2.5  | SRCRB4D | Homo sapiens scavenger receptor cysteine rich domain containing , group B (4 domains) (SRCRB4D) , mRNA [NM_080744]                           | 136853 |
| A_23_P30223  | -1.0 | -1.5 | -1.0 | -2.1 | SRD5A1  | Homo sapiens steroid-5-alpha-reductase, alpha polypeptide 1 (3-oxo-5 alpha-steroid delta 4-dehydrogenase alpha 1) (SRD5A1), mRNA [NM_001047] | 6715   |

|              |      |      |      |      |        |                                                                                                                           |       |
|--------------|------|------|------|------|--------|---------------------------------------------------------------------------------------------------------------------------|-------|
| A_23_P121783 | 1.2  | 1.1  | 1.1  | -2.5 | SRD5A3 | Homo sapiens steroid 5 alpha-reductase 3 (SRD5A3), mRNA [NM_024592]                                                       | 79644 |
| A_23_P129786 | 1.4  | 1.4  | 2.7  | 1.1  | SREBF1 | Homo sapiens sterol regulatory element binding transcription factor 1 (SREBF1), transcript variant 1, mRNA [NM_001005291] | 6720  |
| A_23_P166502 | -1.0 | -1.1 | -3.9 | -1.1 | SREBF2 | sterol regulatory element binding transcription factor 2 [Source:HGNC Symbol;Acc:11290] [ENST00000361204]                 | 6721  |



|              |      |       |      |      |          |                                                                                                                        |        |
|--------------|------|-------|------|------|----------|------------------------------------------------------------------------------------------------------------------------|--------|
| A_24_P944991 | -2.4 | 1.6   | 1.5  | 1.1  | SREK1IP1 | Homo sapiens SREK1-interacting protein 1 (SREK1IP1), mRNA [NM_173829]                                                  | 285672 |
| A_32_P198330 | 4.4  | 4.5   | 4.4  | -3.0 | SREK1IP1 | Homo sapiens SREK1-interacting protein 1 (SREK1IP1), mRNA [NM_173829]                                                  | 285672 |
| A_23_P111020 | -2.1 | -10.4 | -1.6 | -2.4 | SRF      | Homo sapiens serum response factor (c-fos serum response element-binding transcription factor) (SRF), mRNA [NM_003131] | 6722   |

|              |      |       |      |      |        |                                                                                                                        |        |
|--------------|------|-------|------|------|--------|------------------------------------------------------------------------------------------------------------------------|--------|
| A_24_P346277 | -1.7 | -1.3  | -1.4 | -2.9 | SRF    | Homo sapiens serum response factor (c-fos serum response element-binding transcription factor) (SRF), mRNA [NM_003131] | 6722   |
| A_32_P70056  | -1.0 | -1.1  | -2.7 | -1.1 | SRG7   | Homo sapiens spermatogenesis-related protein 7 (SRG7), non-coding RNA [NR_034168]                                      | 642864 |
| A_23_P162449 | 1.0  | -10.7 | -1.0 | -1.1 | SRGAP1 | Homo sapiens SLIT-ROBO Rho GTPase activating protein 1 (SRGAP1), mRNA [NM_020762]                                      | 57522  |

|              |      |      |      |      |        |                                                                                                         |       |
|--------------|------|------|------|------|--------|---------------------------------------------------------------------------------------------------------|-------|
| A_23_P200829 | -2.9 | -1.2 | 1.3  | -2.7 | SRGAP2 | Homo sapiens SLIT-ROBO Rho GTPase activating protein 2 (SRGAP2), transcript variant 1, mRNA [NM_015326] | 23380 |
| A_23_P358410 | 2.1  | 2.3  | 2.1  | 1.9  | SRGAP3 | Homo sapiens SLIT-ROBO Rho GTPase activating protein 3 (SRGAP3), transcript variant 1, mRNA [NM_014850] | 9901  |
| A_24_P153869 | 1.0  | -1.1 | -7.6 | -2.5 | SRGAP3 | SLIT-ROBO Rho GTPase activating protein 3 [Source:HGNC Symbol;Acc:19744] [ENST00000544908]              | 9901  |
| A_23_P59718  | 1.2  | -1.0 | -3.0 | -1.0 | SRI    | Homo sapiens sorcin (SRI), transcript variant 1, mRNA [NM_003130]                                       | 6717  |

|             |      |      |      |     |       |                                                                                                                                    |      |
|-------------|------|------|------|-----|-------|------------------------------------------------------------------------------------------------------------------------------------|------|
| A_23_P74269 | 3.8  | 1.8  | -1.5 | 1.4 | SRM   | Homo sapiens spermidine synthase (SRM), mRNA [NM_003132]                                                                           | 6723 |
| A_23_P68380 | 1.9  | -3.6 | 5.6  | 1.8 | SRMS  | Homo sapiens src-related kinase lacking C-terminal regulatory tyrosine and N-terminal myristylation sites (SRMS), mRNA [NM_080823] | 6725 |
| A_23_P81612 | -1.7 | 1.0  | -4.6 | 1.1 | SRP19 | Homo sapiens signal recognition particle 19kDa (SRP19), transcript variant 1, mRNA [NM_003135]                                     | 6728 |

|              |     |      |      |      |       |                                                                                                |      |
|--------------|-----|------|------|------|-------|------------------------------------------------------------------------------------------------|------|
| A_24_P388810 | 1.2 | 1.1  | 1.1  | -3.5 | SRP19 | Homo sapiens signal recognition particle 19kDa (SRP19), transcript variant 1, mRNA [NM_003135] | 6728 |
| A_32_P151594 | 1.0 | 1.0  | -1.1 | -3.6 | SRP9  | Homo sapiens signal recognition particle 9kDa (SRP9), transcript variant 2, mRNA [NM_003133]   | 6726 |
| A_23_P19543  | 1.1 | 1.1  | -2.5 | 5.2  | SRPK1 | Homo sapiens SRSF protein kinase 1 (SRPK1), transcript variant 1, mRNA [NM_003137]             | 6732 |
| A_23_P215599 | 1.3 | -1.0 | -1.9 | 2.4  | SRPK2 | Homo sapiens SRSF protein kinase 2 (SRPK2), transcript variant 2, mRNA [NM_182691]             | 6733 |

|              |      |      |       |      |       |                                                                                                                    |       |
|--------------|------|------|-------|------|-------|--------------------------------------------------------------------------------------------------------------------|-------|
| A_23_P125772 | 1.3  | -3.6 | -5.6  | -1.2 | SRPK3 | Homo sapiens SRSF protein kinase 3 (SRPK3), transcript variant 1, mRNA [NM_014370]                                 | 26576 |
| A_23_P86943  | -3.0 | -3.0 | -11.5 | -3.2 | SRPR  | Homo sapiens signal recognition particle receptor (docking protein) (SRPR), transcript variant 1, mRNA [NM_003139] | 6734  |
| A_23_P80773  | -1.4 | -3.2 | 2.5   | 1.7  | SRPRB | Homo sapiens signal recognition particle receptor, B subunit (SRPRB), mRNA [NM_021203]                             | 58477 |
| A_23_P136978 | -4.3 | 1.0  | 1.0   | 1.3  | SRPX2 | Homo sapiens sushi-repeat containing protein, X-linked 2 (SRPX2), mRNA [NM_014467]                                 | 27286 |

|              |      |      |      |      |       |                                                                            |        |
|--------------|------|------|------|------|-------|----------------------------------------------------------------------------|--------|
| A_23_P141248 | 1.1  | 1.2  | -3.6 | 1.2  | SRR   | Homo sapiens serine racemase (SRR), mRNA [NM_021947]                       | 63826  |
| A_24_P288954 | 1.3  | 1.3  | -3.8 | -1.0 | SRRD  | Homo sapiens SRR1 domain containing (SRRD), mRNA [NM_001013694]            | 402055 |
| A_24_P11131  | 1.0  | 1.0  | 1.0  | 2.6  | SRRM1 | Homo sapiens serine/arginine repetitive matrix 1 (SRRM1), mRNA [NM_005839] | 10250  |
| A_23_P323166 | -1.2 | -1.2 | -3.6 | 1.1  | SRRM2 | Homo sapiens serine/arginine repetitive matrix 2 (SRRM2), mRNA [NM_016333] | 23524  |

|              |      |      |      |      |      |                                                                                                                    |       |
|--------------|------|------|------|------|------|--------------------------------------------------------------------------------------------------------------------|-------|
| A_23_P111481 | 1.2  | -2.5 | 1.1  | -1.0 | SRRT | Homo sapiens serrate RNA effector molecule homolog (Arabidopsis) (SRRT), transcript variant 1, mRNA [NM_015908]    | 51593 |
| A_24_P383080 | -7.1 | -8.1 | -2.0 | 1.9  | SRRT | Homo sapiens serrate RNA effector molecule homolog (Arabidopsis) (SRRT), transcript variant 4, mRNA [NM_001128853] | 51593 |
| A_23_P111487 | 1.7  | 1.3  | 2.9  | 1.0  | SRRT | Homo sapiens serrate RNA effector molecule homolog (Arabidopsis) (SRRT), transcript variant 4, mRNA [NM_001128853] | 51593 |



|              |      |      |      |     |        |                                                                                                        |        |
|--------------|------|------|------|-----|--------|--------------------------------------------------------------------------------------------------------|--------|
| A_23_P49521  | -2.5 | -3.8 | -2.6 | 1.0 | SRSF1  | Homo sapiens serine/arginine-rich splicing factor 1 (SRSF1), transcript variant 2, mRNA [NM_001078166] | 6426   |
| A_23_P110903 | 2.9  | 2.9  | 1.3  | 1.2 | SRSF12 | Homo sapiens serine/arginine-rich splicing factor 12 (SRSF12), mRNA [NM_080743]                        | 135295 |
| A_23_P413761 | 1.5  | 1.8  | 2.1  | 1.5 | SRSF3  | Homo sapiens serine/arginine-rich splicing factor 3 (SRSF3), transcript variant 1, mRNA [NM_003017]    | 6428   |
| A_23_P109017 | -1.1 | -1.4 | 1.2  | 4.1 | SRSF6  | Homo sapiens serine/arginine-rich splicing factor 6 (SRSF6), transcript variant 1, mRNA [NM_006275]    | 6431   |

|              |      |      |      |       |       |                                                                                                             |       |
|--------------|------|------|------|-------|-------|-------------------------------------------------------------------------------------------------------------|-------|
| A_24_P222911 | -1.3 | -1.1 | -2.8 | -1.1  | SRSF7 | Homo sapiens serine/arginine-rich splicing factor 7 (SRSF7), transcript variant 1, mRNA [NM_001031684]      | 6432  |
| A_23_P363426 | 2.1  | 2.1  | 1.9  | 2.0   | SRSF8 | Homo sapiens serine/arginine-rich splicing factor 8 (SRSF8), mRNA [NM_032102]                               | 10929 |
| A_24_P390070 | -1.9 | -2.2 | -2.1 | -1.0  | SRSF9 | Homo sapiens serine/arginine-rich splicing factor 9 (SRSF9), mRNA [NM_003769]                               | 8683  |
| A_23_P141738 | -1.0 | -1.1 | 1.2  | -16.0 | SS18  | Homo sapiens synovial sarcoma translocation, chromosome 18 (SS18), transcript variant 1, mRNA [NM_00107559] | 6760  |

|              |      |       |      |      |        |                                                                                                              |       |
|--------------|------|-------|------|------|--------|--------------------------------------------------------------------------------------------------------------|-------|
| A_24_P384851 | 1.7  | 2.3   | 2.2  | -1.1 | SS18   | Homo sapiens synovial sarcoma translocation, chromosome 18 (SS18), transcript variant 1, mRNA [NM_001007559] | 6760  |
| A_23_P423926 | -4.4 | -12.2 | -1.0 | -1.6 | SS18L1 | Homo sapiens synovial sarcoma translocation gene on chromosome 18-like 1 (SS18L1), mRNA [NM_198935]          | 26039 |
| A_23_P154025 | 1.3  | 1.7   | -3.4 | -1.8 | SSB    | Homo sapiens Sjogren syndrome antigen B (autoantigen La) (SSB), mRNA [NM_003142]                             | 6741  |

|              |      |      |      |      |       |                                                                                                       |       |
|--------------|------|------|------|------|-------|-------------------------------------------------------------------------------------------------------|-------|
| A_23_P33791  | -5.8 | -1.9 | -2.5 | -2.8 | SSBP2 | Homo sapiens single-stranded DNA binding protein 2 (SSBP2), mRNA [NM_012446]                          | 23635 |
| A_24_P375453 | 1.0  | 1.1  | 2.2  | -2.2 | SSBP3 | Homo sapiens single stranded DNA binding protein 3 (SSBP3), transcript variant 3, mRNA [NM_001009955] | 23648 |
| A_23_P500333 | 5.4  | -1.1 | 1.1  | -1.0 | SSBP3 | Homo sapiens single stranded DNA binding protein 3 (SSBP3), transcript variant 3, mRNA [NM_001009955] | 23648 |

|              |      |      |      |      |       |                                                                                                    |        |
|--------------|------|------|------|------|-------|----------------------------------------------------------------------------------------------------|--------|
| A_24_P159916 | 1.5  | 2.5  | 1.3  | -1.2 | SSBP4 | Homo sapiens single stranded DNA binding protein 4 (SSBP4), transcript variant 1, mRNA [NM_032627] | 170463 |
| A_24_P170717 | 2.0  | 1.4  | 2.4  | 1.6  | SSC5D | Homo sapiens cDNA FLJ35258 fis, clone PROST2004146. [AK092577]                                     | 284297 |
| A_24_P920823 | 1.9  | 1.3  | 2.2  | 1.6  | SSFA2 | Homo sapiens sperm specific antigen 2 (SSFA2), transcript variant 2, mRNA [NM_006751]              | 6744   |
| A_24_P332647 | -3.0 | -1.0 | -1.0 | -2.0 | SSH1  | Homo sapiens slingshot homolog 1 (Drosophila) (SSH1), transcript variant 3, mRNA [NM_001161331]    | 54434  |

|              |      |      |      |      |      |                                                                                         |       |
|--------------|------|------|------|------|------|-----------------------------------------------------------------------------------------|-------|
| A_23_P395954 | 1.2  | 1.4  | 1.3  | -3.6 | SSH2 | slingshot homolog 2 (Drosophila) [Source:HGNC Symbol;Accession:30580] [ENST00000394848] | 85464 |
| A_23_P118712 | 50.0 | 47.7 | 43.3 | 32.9 | SSH2 | slingshot homolog 2 (Drosophila) [Source:HGNC Symbol;Accession:30580] [ENST00000324677] | 85464 |
| A_23_P353048 | 2.4  | 1.7  | 1.2  | -1.4 | SSPO | Homo sapiens SCOP-spondin homolog (Bos taurus) (SSPO), mRNA [NM_198455]                 | 23145 |
| A_32_P89755  | 1.1  | -1.1 | -3.1 | -1.9 | SSR1 | Homo sapiens signal sequence receptor, alpha (SSR1), mRNA [NM_003144]                   | 6745  |

|              |      |      |      |      |        |                                                                                                              |       |
|--------------|------|------|------|------|--------|--------------------------------------------------------------------------------------------------------------|-------|
| A_23_P126474 | -1.0 | -1.1 | -1.1 | -2.3 | SSR2   | Homo sapiens signal sequence receptor, beta (translocation-associated protein beta) (SSR2), mRNA [NM_003145] | 6746  |
| A_23_P259172 | -2.0 | -1.1 | -2.8 | -2.1 | SSR4   | Homo sapiens signal sequence receptor, delta (SSR4), transcript variant 2, mRNA [NM_006280]                  | 6748  |
| A_23_P98261  | 1.7  | 1.6  | -1.5 | -3.3 | SSSCA1 | Homo sapiens Sjogren syndrome/scleroderma autoantigen 1 (SSSCA1), mRNA [NM_006396]                           | 10534 |
| A_23_P318800 | -5.2 | -1.9 | -4.0 | -2.8 | SSTR2  | Homo sapiens somatostatin receptor 2 (SSTR2), mRNA [NM_001050]                                               | 6752  |

|              |      |       |      |      |       |                                                                                                                 |       |
|--------------|------|-------|------|------|-------|-----------------------------------------------------------------------------------------------------------------|-------|
| A_23_P68910  | 1.2  | -3.0  | 1.1  | 1.3  | SSTR3 | Homo sapiens somatostatin receptor 3 (SSTR3), mRNA [NM_001051]                                                  | 6753  |
| A_23_P419582 | -4.3 | -4.5  | 1.4  | -1.4 | SSTR4 | Homo sapiens somatostatin receptor 4 (SSTR4), mRNA [NM_001052]                                                  | 6754  |
| A_23_P77545  | -1.2 | -35.2 | -1.4 | -1.4 | SSTR5 | Homo sapiens somatostatin receptor 5 (SSTR5), transcript variant 1, mRNA [NM_001053]                            | 6755  |
| A_23_P307002 | 2.1  | -1.8  | 1.3  | 1.3  | SSU72 | SSU72 RNA polymerase II CTD phosphatase homolog (S. cerevisiae) [Source:HGNC Symbol;Acc:25016] [ENST0000359060] | 29101 |



|              |     |     |      |       |       |                                                                                                        |       |
|--------------|-----|-----|------|-------|-------|--------------------------------------------------------------------------------------------------------|-------|
| A_23_P63289  | 2.6 | 2.6 | 2.5  | 2.8   | SSU72 | Homo sapiens SSU72 RNA polymerase II CTD phosphatase homolog (S. cerevisiae) (SSU72), mRNA [NM_014188] | 29101 |
| A_23_P252023 | 1.8 | 1.8 | -1.7 | -2.5  | SSX2  | Homo sapiens synovial sarcoma, X breakpoint 2 (SSX2), transcript variant 2, mRNA [NM_175698]           | 6757  |
| A_23_P84359  | 1.8 | 1.9 | 3.0  | -21.3 | SSX5  | Homo sapiens synovial sarcoma, X breakpoint 5 (SSX5), transcript variant 1, mRNA [NM_021015]           | 6758  |

|              |       |      |      |      |      |                                                                                                                      |      |
|--------------|-------|------|------|------|------|----------------------------------------------------------------------------------------------------------------------|------|
| A_32_P44657  | -16.1 | -1.0 | -1.1 | 1.6  | ST13 | Homo sapiens suppression of tumorigenicity 13 (colon carcinoma) (Hsp70 interacting protein) (ST13), mRNA [NM_003932] | 6767 |
| A_32_P167791 | 1.1   | 1.1  | 1.0  | -2.5 | ST13 | Homo sapiens suppression of tumorigenicity 13 (colon carcinoma) (Hsp70 interacting protein) (ST13), mRNA [NM_003932] | 6767 |
| A_32_P50431  | 3.5   | 1.1  | -1.0 | 1.0  | ST13 | Homo sapiens suppression of tumorigenicity 13 (colon carcinoma) (Hsp70 interacting protein) (ST13), mRNA [NM_003932] | 6767 |

|              |     |      |      |      |      |                                                                                                                      |      |
|--------------|-----|------|------|------|------|----------------------------------------------------------------------------------------------------------------------|------|
| A_24_P127021 | 3.5 | 1.6  | 2.4  | 1.0  | ST13 | Homo sapiens suppression of tumorigenicity 13 (colon carcinoma) (Hsp70 interacting protein) (ST13), mRNA [NM_003932] | 6767 |
| A_23_P47282  | 1.1 | -2.2 | 1.8  | -1.3 | ST14 | Homo sapiens suppression of tumorigenicity 14 (colon carcinoma) (ST14), mRNA [NM_021978]                             | 6768 |
| A_23_P31858  | 1.0 | -1.0 | -5.0 | -1.0 | ST18 | Homo sapiens suppression of tumorigenicity 18 (breast carcinoma) (zinc finger protein) (ST18), mRNA [NM_014682]      | 9705 |

|              |      |      |      |      |         |                                                                                                                     |      |
|--------------|------|------|------|------|---------|---------------------------------------------------------------------------------------------------------------------|------|
| A_23_P77623  | -2.4 | 2.2  | -1.1 | 2.7  | ST3GAL2 | Homo sapiens ST3 beta-galactosidase alpha-2,3-sialyltransferase 2 (ST3GAL2), mRNA [NM_006927]                       | 6483 |
| A_24_P268123 | 3.8  | -2.6 | -1.0 | -2.7 | ST3GAL3 | Homo sapiens ST3 beta-galactosidase alpha-2,3-sialyltransferase 3 (ST3GAL3), transcript variant 1, mRNA [NM_174963] | 6487 |
| A_23_P200999 | 2.7  | 2.9  | 2.1  | -8.4 | ST3GAL3 | Homo sapiens ST3 beta-galactosidase alpha-2,3-sialyltransferase 3 (ST3GAL3), transcript variant 1, mRNA [NM_174963] | 6487 |

|              |      |      |      |      |         |                                                                                                                                                           |      |
|--------------|------|------|------|------|---------|-----------------------------------------------------------------------------------------------------------------------------------------------------------|------|
| A_23_P393856 | 1.0  | -1.0 | -1.0 | -3.0 | ST3GAL4 | Homo sapiens cDNA FLJ11867 fis, clone HEMBA10 06976, weakly similar to H.sapiens mRNA for Gal-beta(1-3/1-4)GlcNAc alpha-2.3-sialyltransferase. [AK021929] | 6484 |
| A_24_P181055 | -1.3 | -1.4 | -3.9 | -1.9 | ST3GAL4 | Homo sapiens ST3 beta-galactosidase alpha-2,3-sialyltransferase 4 (ST3GAL4), mRNA [NM_006278]                                                             | 6484 |
| A_23_P136573 | 1.1  | 1.0  | -1.0 | -3.4 | ST3GAL5 | Homo sapiens ST3 beta-galactosidase alpha-2,3-sialyltransferase 5 (ST3GAL5), transcript variant 1, mRNA [NM_003896]                                       | 8869 |

|              |       |      |      |      |            |                                                                                                                                                           |       |
|--------------|-------|------|------|------|------------|-----------------------------------------------------------------------------------------------------------------------------------------------------------|-------|
| A_32_P126157 | -10.1 | 1.1  | 1.0  | 1.1  | ST6GAL2    | Homo sapiens ST6 beta-galactosamide alpha-2,6-sialyltransferase 2 (ST6GAL2), transcript variant 1, mRNA [NM_032528]                                       | 84620 |
| A_23_P54968  | -3.2  | -3.1 | -1.1 | -4.7 | ST6GALNAC1 | Homo sapiens ST6 (alpha-N-acetylneuraminy l-2,3-beta-galactosyl-1,3)-N-acetylgalactosaminide alpha-2,6-sialyltransferase 1 (ST6GALNAC1), mRNA [NM_018414] | 55808 |

|              |     |      |      |      |            |                                                                                                                                                                                  |        |
|--------------|-----|------|------|------|------------|----------------------------------------------------------------------------------------------------------------------------------------------------------------------------------|--------|
| A_23_P49499  | 1.3 | 1.8  | 1.1  | -2.2 | ST6GALNAC2 | Homo sapiens ST6 (alpha-N-acetylneuraminy l-2,3-beta-galactosyl-1,3)-N-acetylgalactosamini de alpha-2,6-sialyltransferase 2 (ST6GALNAC2), mRNA [NM_006456]                       | 10610  |
| A_23_P416711 | 1.3 | -1.9 | -3.5 | -1.0 | ST6GALNAC3 | Homo sapiens ST6 (alpha-N-acetylneuraminy l-2,3-beta-galactosyl-1,3)-N-acetylgalactosamini de alpha-2,6-sialyltransferase 3 (ST6GALNAC3), transcript variant 1, mRNA [NM_152996] | 256435 |

|              |       |     |      |     |            |                                                                                                                                                           |       |
|--------------|-------|-----|------|-----|------------|-----------------------------------------------------------------------------------------------------------------------------------------------------------|-------|
| A_23_P33093  | -46.3 | 1.5 | 1.5  | 1.5 | ST6GALNAC5 | Homo sapiens ST6 (alpha-N-acetylneuraminy l-2,3-beta-galactosyl-1,3)-N-acetylgalactosaminide alpha-2,6-sialyltransferase 5 (ST6GALNAC5), mRNA [NM_030965] | 81849 |
| A_24_P141019 | -1.1  | 1.8 | 2.0  | 1.9 | ST7        | Homo sapiens suppression of tumorigenicity 7 (ST7), transcript variant a, mRNA [NM_018412]                                                                | 7982  |
| A_23_P310582 | -6.4  | 1.1 | -1.1 | 1.0 | ST7L       | Homo sapiens suppression of tumorigenicity 7 like (ST7L), transcript variant 4, mRNA [NM_138729]                                                          | 54879 |



|              |     |     |      |      |         |                                                                                                           |      |
|--------------|-----|-----|------|------|---------|-----------------------------------------------------------------------------------------------------------|------|
| A_23_P354705 | 1.0 | 1.0 | -3.3 | -7.6 | ST8SIA1 | Homo sapiens<br>ST8 alpha-N-acetylneuraminidase alpha-2,8-sialyltransferase 1 (ST8SIA1), mRNA [NM_003034] | 6489 |
| A_24_P664850 | 1.5 | 1.7 | 1.6  | 2.6  | ST8SIA2 | Homo sapiens<br>ST8 alpha-N-acetylneuraminidase alpha-2,8-sialyltransferase 2 (ST8SIA2), mRNA [NM_006011] | 8128 |
| A_23_P117805 | 1.8 | 1.9 | 2.0  | 2.3  | ST8SIA2 | Homo sapiens<br>ST8 alpha-N-acetylneuraminidase alpha-2,8-sialyltransferase 2 (ST8SIA2), mRNA [NM_006011] | 8128 |

|              |      |      |      |      |         |                                                                                                       |       |
|--------------|------|------|------|------|---------|-------------------------------------------------------------------------------------------------------|-------|
| A_32_P154021 | 1.8  | 1.9  | 2.1  | -2.6 | ST8SIA3 | Homo sapiens ST8 alpha-N-acetylneuramini de alpha-2,8-sialyltransferase 3 (ST8SIA3), mRNA [NM_015879] | 51046 |
| A_23_P78392  | -1.3 | -1.9 | -1.4 | -5.1 | ST8SIA3 | Homo sapiens ST8 alpha-N-acetylneuramini de alpha-2,8-sialyltransferase 3 (ST8SIA3), mRNA [NM_015879] | 51046 |
| A_23_P379789 | 1.0  | -1.0 | -2.1 | -1.2 | ST8SIA5 | Homo sapiens ST8 alpha-N-acetylneuramini de alpha-2,8-sialyltransferase 5 (ST8SIA5), mRNA [NM_013305] | 29906 |
| A_23_P32500  | 2.6  | 2.6  | 2.1  | -1.5 | STAB1   | Homo sapiens stabilin 1 (STAB1), mRNA [NM_015136]                                                     | 23166 |

|              |      |      |      |      |         |                                                                             |        |
|--------------|------|------|------|------|---------|-----------------------------------------------------------------------------|--------|
| A_23_P162607 | -1.2 | -1.5 | -1.1 | -3.0 | STAB2   | Homo sapiens stabilin 2 (STAB2), mRNA [NM_017564]                           | 55576  |
| A_23_P121061 | -1.4 | -1.8 | -2.3 | -1.8 | STAC    | Homo sapiens SH3 and cysteine rich domain (STAC), mRNA [NM_003149]          | 6769   |
| A_32_P152195 | -1.2 | 1.0  | -1.0 | 3.3  | STAC2   | Homo sapiens SH3 and cysteine rich domain 2 (STAC2), mRNA [NM_198993]       | 342667 |
| A_24_P374962 | 1.5  | -1.1 | -2.6 | 1.3  | STAG3L2 | Homo sapiens stromal antigen 3-like 2 (STAG3L2), non-coding RNA [NR_040584] | 442582 |

|              |      |      |      |      |         |                                                                                                                               |       |
|--------------|------|------|------|------|---------|-------------------------------------------------------------------------------------------------------------------------------|-------|
| A_32_P98927  | -1.0 | -1.0 | -1.0 | -3.2 | STAG3L4 | Homo sapiens stromal antigen 3-like 4 (STAG3L4), transcript variant 1, non-coding RNA [NR_040585]                             | 64940 |
| A_23_P111480 | -3.8 | -1.9 | -2.2 | -3.3 | STAG3L4 | Homo sapiens stromal antigen 3-like 4 (STAG3L4), transcript variant 1, non-coding RNA [NR_040585]                             | 64940 |
| A_23_P1343   | 1.0  | -2.3 | -1.1 | -1.0 | STAM    | Homo sapiens signal transducing adaptor molecule (SH3 domain and ITAM motif) 1 (STAM), transcript variant 1, mRNA [NM_003473] | 8027  |

|              |      |      |      |      |          |                                                                                                            |       |
|--------------|------|------|------|------|----------|------------------------------------------------------------------------------------------------------------|-------|
| A_23_P28559  | 31.5 | 30.8 | 14.1 | 31.2 | STAMPB   | Homo sapiens STAM binding protein (STAMPB), transcript variant 3, mRNA [NM_213622]                         | 10617 |
| A_23_P385322 | 2.3  | 1.9  | 2.6  | 3.3  | STAMBPL1 | Homo sapiens STAM binding protein-like 1 (STAMBPL1), mRNA [NM_020799]                                      | 57559 |
| A_23_P382188 | 2.3  | 1.5  | 1.7  | 1.5  | STAP2    | Homo sapiens signal transducing adaptor family member 2 (STAP2), transcript variant 2, mRNA [NM_001013841] | 55620 |

|              |     |      |      |      |         |                                                                                                   |       |
|--------------|-----|------|------|------|---------|---------------------------------------------------------------------------------------------------|-------|
| A_23_P36345  | 3.0 | 1.9  | 1.1  | -1.1 | STARD10 | Homo sapiens StAR-related lipid transfer (START) domain containing 10 (STARD10), mRNA [NM_006645] | 10809 |
| A_23_P158880 | 1.0 | -3.5 | 1.0  | 1.0  | STARD5  | Homo sapiens StAR-related lipid transfer (START) domain containing 5 (STARD5), mRNA [NM_181900]   | 80765 |
| A_23_P112921 | 1.1 | 1.0  | -2.2 | -1.8 | STARD5  | Homo sapiens StAR-related lipid transfer (START) domain containing 5 (STARD5), mRNA [NM_181900]   | 80765 |

|              |      |     |     |     |        |                                                                                                                         |       |
|--------------|------|-----|-----|-----|--------|-------------------------------------------------------------------------------------------------------------------------|-------|
| A_32_P130641 | 1.3  | 1.2 | 2.4 | 1.1 | STARD9 | Homo sapiens StAR-related lipid transfer (START) domain containing 9 (STARD9), mRNA [NM_020759]                         | 57519 |
| A_23_P76090  | 10.7 | 3.9 | 9.6 | 6.1 | STAT2  | Homo sapiens signal transducer and activator of transcription 2, 113kDa (STAT2), transcript variant 1, mRNA [NM_005419] | 6773  |

|              |      |     |      |     |        |                                                                                                                                               |      |
|--------------|------|-----|------|-----|--------|-----------------------------------------------------------------------------------------------------------------------------------------------|------|
| A_24_P116805 | -1.3 | 1.5 | -2.5 | 1.2 | STAT3  | Homo sapiens signal transducer and activator of transcription 3 (acute-phase response factor) (STAT3), transcript variant 3, mRNA [NM_213662] | 6774 |
| A_23_P68031  | 1.2  | 1.2 | -2.7 | 1.0 | STAT4  | Homo sapiens signal transducer and activator of transcription 4 (STAT4), transcript variant 1, mRNA [NM_003151]                               | 6775 |
| A_23_P207367 | 1.3  | 1.3 | 2.2  | 1.1 | STAT5A | Homo sapiens signal transducer and activator of transcription 5A (STAT5A), mRNA [NM_003152]                                                   | 6776 |



|              |      |      |      |      |        |                                                                                                                    |      |
|--------------|------|------|------|------|--------|--------------------------------------------------------------------------------------------------------------------|------|
| A_23_P100788 | -1.0 | -2.0 | -1.0 | 3.2  | STAT5B | Homo sapiens signal transducer and activator of transcription 5B (STAT5B), mRNA [NM_012448]                        | 6777 |
| A_24_P342178 | 2.2  | -3.5 | 2.7  | 1.2  | STAT5B | signal transducer and activator of transcription 5B [Source:HGNC Symbol;Acc:11367] [ENST00000468312]               | 6777 |
| A_23_P57059  | -2.6 | -2.7 | -1.2 | -1.1 | STAU1  | Homo sapiens staufen, RNA binding protein, homolog 1 (Drosophila) (STAU1), transcript variant T3, mRNA [NM_017453] | 6780 |

|              |       |      |      |      |       |                                                                                                                   |       |
|--------------|-------|------|------|------|-------|-------------------------------------------------------------------------------------------------------------------|-------|
| A_32_P649    | -11.6 | 1.9  | 1.2  | 1.6  | STAU2 | Homo sapiens staufen, RNA binding protein, homolog 2 (Drosophila) (STAU2), transcript variant 5, mRNA [NM_014393] | 27067 |
| A_24_P914830 | 1.0   | -3.4 | -1.1 | -1.4 | STAU2 | staufen, RNA binding protein, homolog 2 (Drosophila) [Source:HGNC Symbol;Acc:11371] [ENST00000524104]             | 27067 |
| A_23_P254079 | 5.1   | 5.1  | 5.2  | 5.2  | STBD1 | Homo sapiens starch binding domain 1 (STBD1), mRNA [NM_003943]                                                    | 8987  |
| A_23_P314755 | 4.9   | 4.9  | 5.0  | 4.9  | STC1  | Homo sapiens stanniocalcin 1 (STC1), mRNA [NM_003155]                                                             | 6781  |

|              |      |      |      |      |        |                                                                                                       |       |
|--------------|------|------|------|------|--------|-------------------------------------------------------------------------------------------------------|-------|
| A_23_P416395 | 1.1  | -1.5 | -5.8 | -1.3 | STC2   | Homo sapiens stanniocalcin 2 (STC2), mRNA [NM_003714]                                                 | 8614  |
| A_23_P110686 | -4.6 | 1.1  | -2.3 | -1.0 | STC2   | Homo sapiens stanniocalcin 2 (STC2), mRNA [NM_003714]                                                 | 8614  |
| A_23_P31453  | 1.2  | 2.8  | 2.8  | 2.9  | STEAP1 | Homo sapiens six transmembrane epithelial antigen of the prostate 1 (STEAP1), mRNA [NM_012449]        | 26872 |
| A_24_P200000 | 5.8  | 5.8  | 2.7  | 2.9  | STEAP3 | Homo sapiens STEAP family member 3, metalloenductase (STEAP3), transcript variant 1, mRNA [NM_182915] | 55240 |

|              |      |      |     |     |        |                                                                                             |       |
|--------------|------|------|-----|-----|--------|---------------------------------------------------------------------------------------------|-------|
| A_32_P128980 | -1.1 | -2.4 | 1.1 | 1.2 | STEAP4 | STEAP family member 4 [Source:HGNC Symbol;Acc:21923] [ENST00000380079]                      | 79689 |
| A_24_P214231 | 2.2  | 2.2  | 1.2 | 2.6 | STIL   | Homo sapiens SCL/TAL1 interrupting locus (STIL), transcript variant 1, mRNA [NM_001048166]  | 6491  |
| A_24_P180242 | 1.0  | -4.5 | 1.0 | 1.0 | STIM2  | Homo sapiens stromal interaction molecule 2 (STIM2), transcript variant 2, mRNA [NM_020860] | 57620 |
| A_23_P81048  | 1.8  | 3.0  | 3.0 | 2.1 | STIM2  | Homo sapiens stromal interaction molecule 2 (STIM2), transcript variant 2, mRNA [NM_020860] | 57620 |

|              |      |      |      |      |       |                                                                        |       |
|--------------|------|------|------|------|-------|------------------------------------------------------------------------|-------|
| A_24_P327815 | -1.4 | -2.1 | -2.0 | -1.9 | STIP1 | Homo sapiens stress-induced-phosphoprotein 1 (STIP1), mRNA [NM_006819] | 10963 |
| A_24_P46417  | -1.6 | -1.6 | -1.3 | -2.2 | STK10 | Homo sapiens serine/threonine kinase 10 (STK10), mRNA [NM_005990]      | 6793  |
| A_24_P159866 | -2.5 | 2.6  | -1.0 | 2.1  | STK11 | Homo sapiens serine/threonine kinase 11 (STK11), mRNA [NM_000455]      | 6794  |
| A_23_P16483  | 2.7  | 2.6  | 1.8  | 1.2  | STK11 | Homo sapiens serine/threonine kinase 11 (STK11), mRNA [NM_000455]      | 6794  |

|              |      |      |      |     |         |                                                                                                 |        |
|--------------|------|------|------|-----|---------|-------------------------------------------------------------------------------------------------|--------|
| A_24_P393322 | 2.5  | -1.1 | 3.1  | 1.8 | STK11IP | serine/threonine kinase 11 interacting protein [Source:HGNC Symbol;Acc:19184] [ENST00000475396] | 114790 |
| A_23_P108514 | 1.9  | 1.9  | 1.8  | 2.3 | STK16   | Homo sapiens serine/threonine kinase 16 (STK16), transcript variant 1, mRNA [NM_001008910]      | 8576   |
| A_24_P337796 | -3.3 | 1.3  | 1.2  | 1.1 | STK17A  | Homo sapiens serine/threonine kinase 17a (STK17A), mRNA [NM_004760]                             | 9263   |
| A_23_P19479  | 1.4  | -2.2 | -2.1 | 1.5 | STK19   | Homo sapiens serine/threonine kinase 19 (STK19), transcript variant 2, mRNA [NM_032454]         | 8859   |

|              |      |      |      |      |        |                                                                                            |        |
|--------------|------|------|------|------|--------|--------------------------------------------------------------------------------------------|--------|
| A_23_P253177 | -1.2 | -2.4 | -1.3 | -1.2 | STK24  | Homo sapiens serine/threonine kinase 24 (STK24), transcript variant 2, mRNA [NM_001032296] | 8428   |
| A_24_P276983 | 2.3  | -1.4 | 1.1  | 1.8  | STK25  | Homo sapiens serine/threonine kinase 25 (STK25), mRNA [NM_006374]                          | 10494  |
| A_23_P252653 | 1.8  | 3.3  | 3.9  | 1.0  | STK25  | Homo sapiens serine/threonine kinase 25 (STK25), mRNA [NM_006374]                          | 10494  |
| A_32_P118731 | -1.6 | -6.4 | 1.1  | 1.0  | STK32A | serine/threonine kinase 32A [Source:HGNC Symbol;Acc:28317] [ENST00000397936]               | 202374 |

|              |       |      |      |      |        |                                                                                         |        |
|--------------|-------|------|------|------|--------|-----------------------------------------------------------------------------------------|--------|
| A_24_P171690 | -1.3  | 1.0  | -2.0 | 2.4  | STK32B | Homo sapiens serine/threonine kinase 32B (STK32B), mRNA [NM_018401]                     | 55351  |
| A_24_P940537 | 1.0   | -3.3 | 1.0  | 1.0  | STK35  | Homo sapiens serine/threonine kinase 35 (STK35), mRNA [NM_080836]                       | 140901 |
| A_23_P342600 | 3.3   | 3.5  | 1.1  | 1.9  | STK35  | Homo sapiens serine/threonine kinase 35 (STK35), mRNA [NM_080836]                       | 140901 |
| A_23_P335905 | 2.1   | 1.5  | -1.4 | -1.2 | STK36  | Homo sapiens serine/threonine kinase 36 (STK36), transcript variant 1, mRNA [NM_015690] | 27148  |
| A_23_P390704 | -10.1 | 1.1  | 1.4  | 1.0  | STK38  | Homo sapiens serine/threonine kinase 38 (STK38), mRNA [NM_007271]                       | 11329  |



|              |      |      |      |      |       |                                                                                                          |       |
|--------------|------|------|------|------|-------|----------------------------------------------------------------------------------------------------------|-------|
| A_24_P94054  | -1.7 | -3.4 | -1.6 | -3.1 | STK4  | Homo sapiens serine/threonine kinase 4 (STK4), mRNA [NM_006282]                                          | 6789  |
| A_24_P342511 | 2.2  | 2.2  | 3.9  | 1.8  | STMN1 | Homo sapiens stathmin 1 (STMN1), transcript variant 4, mRNA [NM_001145454]                               | 3925  |
| A_23_P399265 | 2.0  | 1.1  | 1.9  | -1.0 | STMN2 | SCG10=neuron-specific growth-associated protein/stathmin homolog [human, embryo, mRNA, 696 nt]. [S82024] | 11075 |
| A_24_P678104 | 2.3  | 1.9  | 2.5  | 1.3  | STMN3 | Homo sapiens stathmin-like 3 (STMN3), mRNA [NM_015894]                                                   | 50861 |

|              |      |      |      |      |        |                                                                       |       |
|--------------|------|------|------|------|--------|-----------------------------------------------------------------------|-------|
| A_23_P31739  | 1.6  | 1.5  | -3.2 | -1.8 | STMN4  | Homo sapiens stathmin-like 4 (STMN4), mRNA [NM_030795]                | 81551 |
| A_23_P255263 | 2.4  | 2.7  | 2.4  | -3.5 | STOM   | Homo sapiens stomatin (STOM), transcript variant 2, mRNA [NM_198194]  | 2040  |
| A_24_P338145 | -5.3 | -1.3 | -1.3 | 3.7  | STOML2 | Homo sapiens stomatin (EPB72)-like 2 (STOML2), mRNA [NM_013442]       | 30968 |
| A_23_P302005 | -1.0 | -1.0 | -3.6 | 1.1  | STON1  | Homo sapiens stonin 1 (STON1), transcript variant 2, mRNA [NM_006873] | 11037 |
| A_23_P309837 | -1.8 | -1.8 | -1.9 | -2.1 | STON2  | Homo sapiens stonin 2 (STON2), mRNA [NM_033104]                       | 85439 |

|              |     |      |      |      |        |                                                                                                                 |        |
|--------------|-----|------|------|------|--------|-----------------------------------------------------------------------------------------------------------------|--------|
| A_32_P51119  | 1.2 | -2.0 | 2.1  | -2.4 | STOX1  | Homo sapiens storkhead box 1 (STOX1), transcript variant 1, mRNA [NM_152709]                                    | 219736 |
| A_23_P344481 | 1.0 | -1.1 | -1.1 | -6.9 | STOX1  | Homo sapiens storkhead box 1 (STOX1), transcript variant 1, mRNA [NM_152709]                                    | 219736 |
| A_24_P65507  | 1.0 | 1.6  | -3.1 | -1.5 | STRA13 | Homo sapiens stimulated by retinoic acid 13 homolog (mouse) (STRA13), mRNA [NM_144998]                          | 201254 |
| A_23_P65779  | 2.1 | 2.5  | -1.1 | 3.4  | STRA6  | Homo sapiens stimulated by retinoic acid gene 6 homolog (mouse) (STRA6), transcript variant 2, mRNA [NM_022369] | 64220  |

|              |      |      |      |      |        |                                                                                                  |       |
|--------------|------|------|------|------|--------|--------------------------------------------------------------------------------------------------|-------|
| A_24_P147407 | -2.7 | 1.5  | -1.8 | -1.0 | STRADA | Homo sapiens STE20-related kinase adaptor alpha (STRADA), transcript variant 3, mRNA [NM_153335] | 92335 |
| A_32_P177750 | -9.9 | 1.8  | 1.5  | -3.5 | STRADB | Homo sapiens STE20-related kinase adaptor beta (STRADB), transcript variant 1, mRNA [NM_018571]  | 55437 |
| A_23_P13852  | -1.2 | -2.0 | -1.1 | -1.0 | STRAP  | Homo sapiens serine/threonine kinase receptor associated protein (STRAP), mRNA [NM_007178]       | 11171 |

|              |      |      |      |      |       |                                                                                                        |        |
|--------------|------|------|------|------|-------|--------------------------------------------------------------------------------------------------------|--------|
| A_24_P916364 | 1.1  | 1.1  | -4.0 | -1.4 | STRBP | Homo sapiens spermatid perinuclear RNA binding protein (STRBP), transcript variant 1, mRNA [NM_018387] | 55342  |
| A_24_P398016 | 1.1  | -1.7 | -2.9 | -5.8 | STRBP | Homo sapiens spermatid perinuclear RNA binding protein (STRBP), transcript variant 1, mRNA [NM_018387] | 55342  |
| A_23_P163238 | -2.1 | -1.6 | -1.3 | -2.6 | STRC  | Homo sapiens stereocilin (STRC), mRNA [NM_153700]                                                      | 161497 |
| A_23_P165521 | -1.1 | -1.1 | -2.2 | -1.2 | STRN  | Homo sapiens striatin, calmodulin binding protein (STRN), mRNA [NM_003162]                             | 6801   |

|              |      |      |      |      |       |                                                                                                                          |        |
|--------------|------|------|------|------|-------|--------------------------------------------------------------------------------------------------------------------------|--------|
| A_32_P78904  | -4.0 | 1.1  | 1.4  | 1.1  | STRN  | Homo sapiens striatin, calmodulin binding protein (STRN), mRNA [NM_003162]                                               | 6801   |
| A_32_P92536  | -1.0 | -6.1 | -1.0 | -2.2 | STRN  | Homo sapiens striatin, calmodulin binding protein (STRN), mRNA [NM_003162]                                               | 6801   |
| A_24_P331560 | 1.0  | -1.0 | -2.2 | 1.0  | STS   | Homo sapiens steroid sulfatase (microsomal), isozyme S (STS), mRNA [NM_000351]                                           | 412    |
| A_23_P434473 | -2.3 | -1.9 | -2.8 | -1.9 | STT3B | Homo sapiens STT3, subunit of the oligosaccharyltransferase complex, homolog B (S. cerevisiae) (STT3B), mRNA [NM_178862] | 201595 |

|              |      |      |      |      |       |                                                                                                              |       |
|--------------|------|------|------|------|-------|--------------------------------------------------------------------------------------------------------------|-------|
| A_23_P28084  | -1.3 | -2.5 | 1.3  | 1.6  | STX10 | syntaxin<br>10<br>[Source:H<br>GNC<br>Symbol;Ac<br>c:11428]<br>[ENST0000<br>0343587]                         | 8677  |
| A_23_P156788 | -1.1 | 4.3  | 3.3  | 1.3  | STX11 | Homo<br>sapiens<br>syntaxin<br>11<br>(STX11),<br>mRNA<br>[NM_0037<br>64]                                     | 8676  |
| A_23_P385206 | 5.5  | 5.5  | 4.0  | 4.5  | STX12 | Homo<br>sapiens<br>syntaxin<br>12<br>(STX12),<br>mRNA<br>[NM_1774<br>24]                                     | 23673 |
| A_24_P936122 | 7.4  | 10.9 | 8.4  | -2.1 | STX16 | Homo<br>sapiens<br>syntaxin<br>16<br>(STX16),<br>transcript<br>variant 1,<br>mRNA<br>[NM_0010<br>01433]      | 8675  |
| A_23_P168556 | 1.4  | -1.2 | -1.2 | -7.1 | STX1A | Homo<br>sapiens<br>syntaxin<br>1A (brain)<br>(STX1A),<br>transcript<br>variant 1,<br>mRNA<br>[NM_0046<br>03] | 6804  |

|              |      |      |      |      |      |                                                                        |       |
|--------------|------|------|------|------|------|------------------------------------------------------------------------|-------|
| A_23_P256375 | 2.5  | 1.3  | 2.6  | 1.4  | STX4 | Homo sapiens syntaxin 4 (STX4), mRNA [NM_004604]                       | 6810  |
| A_23_P61646  | -1.3 | -2.3 | -2.3 | 1.5  | STX4 | Homo sapiens syntaxin 4 (STX4), mRNA [NM_004604]                       | 6810  |
| A_23_P24755  | 1.6  | 2.6  | -1.3 | 1.2  | STX5 | Homo sapiens syntaxin 5 (STX5), transcript variant 1, mRNA [NM_003164] | 6811  |
| A_23_P97725  | 1.3  | -1.6 | 2.5  | 1.7  | STX6 | Homo sapiens syntaxin 6 (STX6), mRNA [NM_005819]                       | 10228 |
| A_23_P146908 | -2.2 | -2.8 | -2.8 | -2.4 | STX8 | Homo sapiens syntaxin 8 (STX8), transcript variant 1, mRNA [NM_004853] | 9482  |



|              |      |      |      |      |         |                                                                                                           |       |
|--------------|------|------|------|------|---------|-----------------------------------------------------------------------------------------------------------|-------|
| A_23_P130619 | -2.0 | 1.3  | 1.2  | -7.2 | STXBP2  | Homo sapiens syntaxin binding protein 2 (STXBP2), transcript variant 1, mRNA [NM_006949]                  | 6813  |
| A_23_P418785 | 1.1  | -1.5 | -3.0 | 1.1  | STXBP5L | Homo sapiens syntaxin binding protein 5-like (STXBP5L), mRNA [NM_014980]                                  | 9515  |
| A_23_P205713 | -1.6 | -2.3 | -2.6 | 1.0  | STXBP6  | Homo sapiens syntaxin binding protein 6 (amisyn) (STXBP6), mRNA [NM_014178]                               | 29091 |
| A_23_P117540 | -4.0 | 1.0  | 1.0  | -1.2 | STYX    | Homo sapiens serine/threonine/tyrosine interacting protein (STYX), transcript variant 1, mRNA [NM_145251] | 6815  |

|              |      |      |      |      |        |                                                                                                                                      |       |
|--------------|------|------|------|------|--------|--------------------------------------------------------------------------------------------------------------------------------------|-------|
| A_24_P320328 | 1.4  | 1.4  | -2.2 | -2.3 | SUB1   | Homo sapiens SUB1 homolog (S. cerevisiae) (SUB1), mRNA [NM_006713]                                                                   | 10923 |
| A_24_P181275 | -1.8 | -2.1 | -1.5 | 1.2  | SUCLA2 | Homo sapiens succinate-CoA ligase, ADP-forming, beta subunit (SUCLA2), nuclear gene encoding mitochondrial protein, mRNA [NM_003850] | 8803  |
| A_23_P69171  | -2.0 | -2.0 | -2.3 | -2.7 | SUCNR1 | Homo sapiens succinate receptor 1 (SUCNR1), mRNA [NM_033050]                                                                         | 56670 |

|              |      |      |      |      |       |                                                                                                      |       |
|--------------|------|------|------|------|-------|------------------------------------------------------------------------------------------------------|-------|
| A_23_P334990 | -5.6 | -1.0 | -1.1 | -1.0 | SUDS3 | Homo sapiens suppressor of defective silencing 3 homolog (S. cerevisiae) (SUDS3), mRNA [NM_022491]   | 64426 |
| A_24_P149893 | 2.6  | 3.7  | 2.4  | 1.6  | SUFU  | Homo sapiens suppressor of fused homolog (Drosophila) (SUFU), transcript variant 1, mRNA [NM_016169] | 51684 |
| A_23_P16562  | -2.9 | -1.0 | -1.1 | -1.1 | SUGP2 | Homo sapiens SURP and G patch domain containing 2 (SUGP2), transcript variant 1, mRNA [NM_001017392] | 10147 |

|              |      |      |      |      |         |                                                                                                                                    |       |
|--------------|------|------|------|------|---------|------------------------------------------------------------------------------------------------------------------------------------|-------|
| A_24_P280706 | -1.0 | -1.1 | -1.2 | -2.2 | SUGT1   | Homo sapiens SGT1, suppressor of G2 allele of SKP1 (S. cerevisiae) (SUGT1), transcript variant 1A, mRNA [NM_006704]                | 10910 |
| A_23_P154605 | -2.2 | 1.0  | 1.1  | -1.1 | SULF2   | Homo sapiens sulfatase 2 (SULF2), transcript variant 1, mRNA [NM_018837]                                                           | 55959 |
| A_23_P106773 | -1.8 | -1.9 | -6.0 | -2.0 | SULT1A2 | Homo sapiens sulfotransferase family, cytosolic, 1A, phenol-preferring, member 2 (SULT1A2), transcript variant 2, mRNA [NM_177528] | 6799  |

|              |     |     |      |     |         |                                                                                                                 |        |
|--------------|-----|-----|------|-----|---------|-----------------------------------------------------------------------------------------------------------------|--------|
| A_24_P262201 | 1.3 | 1.3 | -3.0 | 1.7 | SULT1A4 | Homo sapiens sulfotransferase family, cytosolic, 1A, phenol-preferring, member 4 (SULT1A4), mRNA [NM_001017390] | 445329 |
| A_23_P302470 | 5.2 | 5.2 | 1.6  | 3.6 | SULT1B1 | Homo sapiens sulfotransferase family, cytosolic, 1B, member 1 (SULT1B1), mRNA [NM_014465]                       | 27284  |
| A_23_P155786 | 3.8 | 3.9 | 3.7  | 2.2 | SULT1E1 | Homo sapiens sulfotransferase family 1E, estrogen-preferring, member 1 (SULT1E1), mRNA [NM_005420]              | 6783   |

|              |      |      |      |     |         |                                                                                                                                     |        |
|--------------|------|------|------|-----|---------|-------------------------------------------------------------------------------------------------------------------------------------|--------|
| A_24_P224684 | -6.5 | 1.2  | 1.1  | 1.1 | SULT2A1 | Homo sapiens sulfotransferase family, cytosolic, 2A, dehydroepiandrosterone (DHEA)-preferring, member 1 (SULT2A1), mRNA [NM_003167] | 6822   |
| A_23_P67381  | 1.2  | -3.2 | -1.1 | 1.1 | SULT2A1 | Homo sapiens sulfotransferase family, cytosolic, 2A, dehydroepiandrosterone (DHEA)-preferring, member 1 (SULT2A1), mRNA [NM_003167] | 6822   |
| A_23_P69242  | 1.0  | -1.0 | -1.1 | 3.2 | SUMF1   | Homo sapiens sulfatase modifying factor 1 (SUMF1), transcript variant 1, mRNA [NM_182760]                                           | 285362 |

|              |      |      |      |       |       |                                                                                                                     |       |
|--------------|------|------|------|-------|-------|---------------------------------------------------------------------------------------------------------------------|-------|
| A_23_P118435 | -2.0 | -1.1 | -3.2 | -1.9  | SUMO2 | Homo sapiens SMT3 suppressor of mif two 3 homolog 2 (S. cerevisiae) (SUMO2), transcript variant 1, mRNA [NM_006937] | 6613  |
| A_32_P228869 | 1.9  | 2.2  | 1.9  | 1.3   | SUMO2 | Homo sapiens SMT3 suppressor of mif two 3 homolog 2 (S. cerevisiae) (SUMO2), transcript variant 1, mRNA [NM_006937] | 6613  |
| A_23_P147070 | 1.1  | 1.0  | -1.0 | -15.2 | SUN1  | Sad1 and UNC84 domain containing 1 [Source:HGNC Symbol;Acc:18587] [ENST00000340926]                                 | 23353 |

|              |      |      |      |      |      |                                                                                                   |        |
|--------------|------|------|------|------|------|---------------------------------------------------------------------------------------------------|--------|
| A_24_P320645 | -1.7 | -2.6 | 1.6  | -1.1 | SUN1 | Homo sapiens Sad1 and UNC84 domain containing 1 (SUN1), transcript variant 2, mRNA [NM_025154]    | 23353  |
| A_23_P329962 | 1.0  | -1.5 | -3.5 | -1.4 | SUN3 | Homo sapiens Sad1 and UNC84 domain containing 3 (SUN3), transcript variant 1, mRNA [NM_001030019] | 256979 |
| A_23_P109224 | -3.7 | 2.1  | -1.0 | -1.0 | SUN5 | Sad1 and UNC84 domain containing 5 [Source:HGNC Symbol;Acc:16252] [ENST00000420875]               | 140732 |
| A_23_P109229 | -8.3 | -1.9 | -1.1 | -5.2 | SUN5 | Homo sapiens Sad1 and UNC84 domain containing 5 (SUN5), mRNA [NM_080675]                          | 140732 |



|              |       |      |      |      |         |                                                                                                          |       |
|--------------|-------|------|------|------|---------|----------------------------------------------------------------------------------------------------------|-------|
| A_24_P153800 | 1.3   | 1.3  | -2.1 | -1.2 | SUPT16H | Homo sapiens suppressor of Ty 16 homolog (S. cerevisiae) (SUPT16H), mRNA [NM_007192]                     | 11198 |
| A_24_P827    | -30.0 | 1.1  | 1.0  | 1.0  | SUPT3H  | Homo sapiens suppressor of Ty 3 homolog (S. cerevisiae) (SUPT3H), transcript variant 1, mRNA [NM_003599] | 8464  |
| A_23_P163942 | -1.0  | -1.3 | -1.2 | -3.3 | SUPT4H1 | Homo sapiens suppressor of Ty 4 homolog 1 (S. cerevisiae) (SUPT4H1), mRNA [NM_003168]                    | 6827  |

|              |      |      |      |      |         |                                                                                                          |      |
|--------------|------|------|------|------|---------|----------------------------------------------------------------------------------------------------------|------|
| A_24_P1910   | -1.0 | -1.1 | -2.1 | -1.1 | SUPT4H1 | Homo sapiens suppressor of Ty 4 homolog 1 (S. cerevisiae) (SUPT4H1), mRNA [NM_003168]                    | 6827 |
| A_23_P27840  | 4.4  | 1.3  | 1.5  | -1.0 | SUPT5H  | Homo sapiens suppressor of Ty 5 homolog (S. cerevisiae) (SUPT5H), transcript variant 1, mRNA [NM_003169] | 6829 |
| A_23_P141479 | -3.2 | 2.0  | -2.2 | -1.6 | SUPT6H  | Homo sapiens suppressor of Ty 6 homolog (S. cerevisiae) (SUPT6H), mRNA [NM_003170]                       | 6830 |

|              |      |       |      |       |         |                                                                                               |      |
|--------------|------|-------|------|-------|---------|-----------------------------------------------------------------------------------------------|------|
| A_24_P126873 | 1.2  | 2.1   | -1.5 | 1.6   | SUPT6H  | Homo sapiens suppressor of Ty 6 homolog (S. cerevisiae) (SUPT6H), mRNA [NM_003170]            | 6830 |
| A_24_P282751 | -1.0 | -1.0  | -1.1 | -3.9  | SUPT7L  | Homo sapiens suppressor of Ty 7 (S. cerevisiae)-like (SUPT7L), mRNA [NM_014860]               | 9913 |
| A_23_P63847  | 1.5  | 2.8   | -1.3 | -10.8 | SUPV3L1 | Homo sapiens suppressor of var1, 3-like 1 (S. cerevisiae) (SUPV3L1), mRNA [NM_003171]         | 6832 |
| A_23_P20648  | 1.1  | -11.3 | -1.7 | 1.0   | SURF1   | Homo sapiens surfait 1 (SURF1), nuclear gene encoding mitochondrial protein, mRNA [NM_003172] | 6834 |

|              |      |      |      |      |          |                                                                                                        |       |
|--------------|------|------|------|------|----------|--------------------------------------------------------------------------------------------------------|-------|
| A_24_P89971  | 6.4  | 6.1  | 5.6  | 5.7  | SURF4    | Homo sapiens surfait 4 (SURF4), mRNA [NM_033161]                                                       | 6836  |
| A_23_P32052  | -4.7 | -2.2 | -1.4 | -4.1 | SURF4    | Homo sapiens surfait 4 (SURF4), mRNA [NM_033161]                                                       | 6836  |
| A_23_P422193 | 1.9  | 2.5  | 1.9  | 1.0  | SUV39H1  | Homo sapiens suppressor of variegation 3-9 homolog 1 (Drosophila) (SUV39H1), mRNA [NM_003173]          | 6839  |
| A_24_P295709 | 2.9  | 2.8  | 2.5  | 2.6  | SUV420H1 | suppressor of variegation 4-20 homolog 1 (Drosophila) [Source:HGNC Symbol;Acc:24283] [ENST00000304363] | 51111 |

|              |      |      |      |      |       |                                                                                    |       |
|--------------|------|------|------|------|-------|------------------------------------------------------------------------------------|-------|
| A_24_P873263 | -1.9 | -1.8 | -3.9 | -2.5 | SUZ12 | Homo sapiens suppressor of zeste 12 homolog (Drosophila) (SUZ12), mRNA [NM_015355] | 23512 |
| A_32_P24223  | -2.4 | -4.5 | -3.4 | 1.9  | SUZ12 | Homo sapiens suppressor of zeste 12 homolog (Drosophila) (SUZ12), mRNA [NM_015355] | 23512 |
| A_23_P23728  | 1.4  | 1.4  | 1.2  | -2.6 | SV2A  | Homo sapiens synaptic vesicle glycoprotein 2A (SV2A), mRNA [NM_014849]             | 9900  |
| A_24_P131236 | -9.8 | 1.6  | 1.2  | 1.1  | SV2A  | Homo sapiens synaptic vesicle glycoprotein 2A (SV2A), mRNA [NM_014849]             | 9900  |

|              |      |      |      |      |       |                                                                                                                   |       |
|--------------|------|------|------|------|-------|-------------------------------------------------------------------------------------------------------------------|-------|
| A_23_P100022 | 4.1  | 4.0  | 3.9  | 3.0  | SV2B  | Homo sapiens synaptic vesicle glycoprotein 2B (SV2B), transcript variant 1, mRNA [NM_014848]                      | 9899  |
| A_32_P199573 | -2.3 | -1.9 | -2.0 | -2.2 | SV2C  | synaptic vesicle glycoprotein 2C [Source:HGNC Symbol;Acc:30670] [ENST00000502798]                                 | 22987 |
| A_23_P216596 | -2.4 | -1.3 | -1.2 | -2.6 | SVEP1 | Homo sapiens sushi, von Willebrand factor type A, EGF and pentraxin domain containing 1 (SVEP1), mRNA [NM_153366] | 79987 |

|              |      |     |      |      |       |                                                                                                                             |       |
|--------------|------|-----|------|------|-------|-----------------------------------------------------------------------------------------------------------------------------|-------|
| A_23_P323178 | 2.5  | 2.9 | 1.2  | 2.0  | SVEP1 | sushi, von Willebrand factor type A, EGF and pentraxin domain containing 1 [Source:HGNC Symbol;Acc:15985] [ENST00000302728] | 79987 |
| A_24_P41276  | -2.7 | 1.0 | -5.2 | 1.0  | SVEP1 | Homo sapiens sushi, von Willebrand factor type A, EGF and pentraxin domain containing 1 (SVEP1), mRNA [NM_153366]           | 79987 |
| A_23_P112982 | 1.4  | 1.4 | -2.0 | -1.0 | SVOP  | Homo sapiens SV2 related protein homolog (rat) (SVOP), mRNA [NM_018711]                                                     | 55530 |

|              |      |      |      |      |        |                                                                                                |           |
|--------------|------|------|------|------|--------|------------------------------------------------------------------------------------------------|-----------|
| A_23_P307860 | -1.4 | 2.4  | 1.2  | -2.2 | SVOPL  | Homo sapiens SVOP-like (SVOPL), transcript variant 2, mRNA [NM_174959]                         | 136306    |
| A_32_P71551  | 1.2  | -2.0 | -2.8 | 1.0  | SYCE1L | Homo sapiens synaptosomal complex central element protein 1-like (SYCE1L), mRNA [NM_001129979] | 100130958 |
| A_32_P203528 | 1.0  | -9.4 | -1.0 | 1.0  | SYCE2  | Homo sapiens synaptosomal complex central element protein 2 (SYCE2), mRNA [NM_001105578]       | 256126    |
| A_24_P39928  | -1.5 | -2.1 | 1.4  | -1.5 | SYCN   | Homo sapiens syncollin (SYCN), mRNA [NM_001080468]                                             | 342898    |



|              |      |      |      |      |        |                                                                                                |        |
|--------------|------|------|------|------|--------|------------------------------------------------------------------------------------------------|--------|
| A_24_P333644 | -7.1 | -1.0 | -1.0 | -1.0 | SYCP2  | Homo sapiens synaptonemal complex protein 2 (SYCP2), mRNA [NM_014258]                          | 10388  |
| A_23_P347777 | 1.1  | -1.7 | -4.4 | -1.0 | SYCP2L | Homo sapiens synaptonemal complex protein 2-like (SYCP2L), mRNA [NM_001040274]                 | 221711 |
| A_24_P915300 | -1.4 | -1.3 | -2.8 | 1.7  | SYDE2  | Homo sapiens synapse defective 1, Rho GTPase, homolog 2 (C. elegans) (SYDE2), mRNA [NM_032184] | 84144  |
| A_23_P33847  | 1.2  | -1.0 | -1.2 | 2.9  | SYN1   | Homo sapiens synapsin I (SYN1), transcript variant Ia, mRNA [NM_006950]                        | 6853   |

|              |      |      |      |      |          |                                                                                                                              |        |
|--------------|------|------|------|------|----------|------------------------------------------------------------------------------------------------------------------------------|--------|
| A_23_P500824 | 3.0  | 1.9  | 1.3  | 1.2  | SYN1     | Homo sapiens synapsin I (SYN1), transcript variant Ib, mRNA [NM_133499]                                                      | 6853   |
| A_23_P80295  | -1.3 | -4.4 | -1.1 | -1.1 | SYN3     | Homo sapiens synapsin III (SYN3), transcript variant IIIa, mRNA [NM_003490]                                                  | 8224   |
| A_24_P940599 | 1.2  | 2.4  | 1.2  | 1.3  | SYNCRIP  | Homo sapiens synaptotagmin binding, cytoplasmic RNA interacting protein (SYNCRIP), transcript variant 6, mRNA [NM_001159677] | 10492  |
| A_24_P595237 | -3.3 | -1.0 | -1.0 | -1.0 | SYNDIG1L | Homo sapiens synapse differentiation inducing 1-like (SYNDIG1L), mRNA [NM_001105579]                                         | 646658 |

|              |       |      |      |       |       |                                                                                                              |       |
|--------------|-------|------|------|-------|-------|--------------------------------------------------------------------------------------------------------------|-------|
| A_24_P410453 | 1.0   | 1.3  | -1.5 | -3.5  | SYNE1 | Homo sapiens spectrin repeat containing , nuclear envelope 1 (SYNE1), transcript variant 2, mRNA [NM_033071] | 23345 |
| A_23_P500861 | 1.4   | 1.5  | -3.0 | -1.2  | SYNE1 | Homo sapiens spectrin repeat containing , nuclear envelope 1 (SYNE1), transcript variant 1, mRNA [NM_182961] | 23345 |
| A_23_P128887 | -32.7 | -3.7 | 1.0  | -15.2 | SYNE2 | Homo sapiens spectrin repeat containing , nuclear envelope 2 (SYNE2), transcript variant 5, mRNA [NM_182914] | 23224 |

|              |      |      |      |      |         |                                                                                   |       |
|--------------|------|------|------|------|---------|-----------------------------------------------------------------------------------|-------|
| A_24_P9346   | 1.1  | 1.1  | 2.0  | 1.1  | SYNGAP1 | Homo sapiens synaptic Ras GTPase activating protein 1 (SYNGAP1), mRNA [NM_006772] | 8831  |
| A_24_P347854 | -5.6 | -2.8 | -4.8 | -1.4 | SYNGR2  | Homo sapiens synaptogyrin 2 (SYNGR2), mRNA [NM_004710]                            | 9144  |
| A_23_P164927 | 2.4  | 1.1  | 2.5  | 1.4  | SYNGR4  | Homo sapiens synaptogyrin 4 (SYNGR4), mRNA [NM_012451]                            | 23546 |
| A_24_P201919 | -1.8 | -5.2 | -6.9 | -3.3 | SYNJ2BP | Homo sapiens synaptogyrin 2 binding protein (SYNJ2BP), mRNA [NM_018373]           | 55333 |
| A_24_P405992 | 2.5  | 3.1  | -1.1 | 3.7  | SYNPO   | Homo sapiens synaptopodin (SYNPO), transcript variant 1, mRNA [NM_007286]         | 11346 |

|              |      |      |      |      |       |                                                                                   |       |
|--------------|------|------|------|------|-------|-----------------------------------------------------------------------------------|-------|
| A_23_P344531 | 1.0  | 1.6  | -1.0 | -5.6 | SYNPO | Homo sapiens synaptopodin (SYNPO), transcript variant 1, mRNA [NM_007286]         | 11346 |
| A_23_P207541 | -1.2 | -2.2 | -1.0 | 1.0  | SYNRG | Homo sapiens synergin, gamma (SYNRG), transcript variant 1, mRNA [NM_007247]      | 11276 |
| A_24_P141005 | 3.4  | 2.5  | 2.8  | 4.2  | SYPL1 | Homo sapiens synaptophysin-like 1 (SYPL1), transcript variant 2, mRNA [NM_182715] | 6856  |
| A_23_P93881  | 1.7  | 2.5  | 1.7  | -1.1 | SYPL1 | Homo sapiens synaptophysin-like 1 (SYPL1), transcript variant 2, mRNA [NM_182715] | 6856  |

|              |       |      |      |      |       |                                                                                                                                    |       |
|--------------|-------|------|------|------|-------|------------------------------------------------------------------------------------------------------------------------------------|-------|
| A_23_P369456 | 1.1   | 1.0  | -1.0 | 2.7  | SYS1  | Homo sapiens SYS1 Golgi-localized integral membrane protein homolog (S. cerevisiae) (SYS1), transcript variant 1, mRNA [NM_033542] | 90196 |
| A_23_P36795  | -5.5  | -1.2 | -3.2 | -1.4 | SYT1  | Homo sapiens synaptotagmin I (SYT1), transcript variant 1, mRNA [NM_005639]                                                        | 6857  |
| A_23_P161659 | 2.7   | 2.7  | 2.7  | 2.6  | SYT13 | Homo sapiens synaptotagmin XIII (SYT13), transcript variant 1, mRNA [NM_020826]                                                    | 57586 |
| A_24_P109069 | -14.0 | 1.8  | 1.6  | 1.2  | SYT15 | Homo sapiens synaptotagmin XV (SYT15), transcript variant b, mRNA [NM_181519]                                                      | 83849 |

|              |      |      |      |      |       |                                                                               |        |
|--------------|------|------|------|------|-------|-------------------------------------------------------------------------------|--------|
| A_23_P163697 | 2.8  | 2.6  | 2.5  | 3.2  | SYT17 | Homo sapiens synaptotagmin XVII (SYT17), mRNA [NM_016524]                     | 51760  |
| A_23_P104098 | -2.8 | -1.5 | -2.2 | -1.5 | SYT2  | Homo sapiens synaptotagmin II (SYT2), transcript variant 1, mRNA [NM_177402]  | 127833 |
| A_23_P55917  | 1.7  | 1.6  | -3.3 | 1.0  | SYT3  | Homo sapiens synaptotagmin III (SYT3), transcript variant 1, mRNA [NM_032298] | 84258  |
| A_24_P373877 | -1.3 | 1.3  | 3.4  | 1.1  | SYT5  | Homo sapiens synaptotagmin V (SYT5), mRNA [NM_003180]                         | 6861   |
| A_23_P36187  | -3.6 | -1.5 | -1.2 | -1.5 | SYT8  | Homo sapiens synaptotagmin VIII (SYT8), mRNA [NM_138567]                      | 90019  |

|              |      |      |      |      |       |                                                                                                         |       |
|--------------|------|------|------|------|-------|---------------------------------------------------------------------------------------------------------|-------|
| A_23_P46390  | 2.1  | 1.6  | 4.2  | 2.4  | SYTL1 | Homo sapiens synaptotagmin-like 1 (SYTL1), transcript variant 2, mRNA [NM_032872]                       | 84958 |
| A_23_P317082 | -1.3 | -1.7 | -1.6 | -3.8 | SYTL5 | Homo sapiens synaptotagmin-like 5 (SYTL5), transcript variant 1, mRNA [NM_138780]                       | 94122 |
| A_23_P138826 | -1.2 | -1.3 | -1.0 | -7.6 | SYVN1 | Homo sapiens synovial apoptosis inhibitor 1, synoviolin (SYVN1), transcript variant 2, mRNA [NM_172230] | 84447 |
| A_23_P51639  | -2.3 | -3.9 | -1.2 | -1.8 | SZT2  | Homo sapiens seizure threshold 2 homolog (mouse) (SZT2), mRNA [NM_015284]                               | 23334 |



|              |      |      |      |       |       |                                                                                            |        |
|--------------|------|------|------|-------|-------|--------------------------------------------------------------------------------------------|--------|
| A_24_P63642  | 1.0  | -1.2 | -1.8 | -2.1  | T     | Homo sapiens T, brachyury homolog (mouse) (T), mRNA [NM_003181]                            | 6862   |
| A_23_P8269   | -1.2 | 1.6  | 1.7  | -2.2  | TAAR8 | Homo sapiens trace amine associated receptor 8 (TAAR8), mRNA [NM_053278]                   | 83551  |
| A_23_P168266 | 1.0  | 1.9  | 1.0  | -11.9 | TAAR9 | Homo sapiens trace amine associated receptor 9 (gene/pseudogene) (TAAR9), mRNA [NM_175057] | 134860 |
| A_23_P215283 | 1.0  | -1.5 | -2.5 | 1.4   | TAC1  | Homo sapiens tachykinin, precursor 1 (TAC1), transcript variant beta, mRNA [NM_003182]     | 6863   |

|              |      |      |      |      |       |                                                                                                                    |       |
|--------------|------|------|------|------|-------|--------------------------------------------------------------------------------------------------------------------|-------|
| A_24_P98249  | 1.7  | 1.2  | 2.0  | 1.3  | TACC1 | Homo sapiens transforming, acidic coiled-coil containing protein 1 (TACC1), transcript variant 1, mRNA [NM_006283] | 6867  |
| A_23_P60047  | -1.0 | -1.0 | -1.0 | -3.1 | TACC1 | Homo sapiens transforming, acidic coiled-coil containing protein 1 (TACC1), transcript variant 1, mRNA [NM_006283] | 6867  |
| A_24_P462656 | -1.1 | 1.0  | -2.1 | 1.0  | TACC2 | transforming, acidic coiled-coil containing protein 2 [Source:HGNC Symbol;Acc:11523] [ENST0000492689]              | 10579 |

|              |      |     |      |       |       |                                                                                                                                                               |       |
|--------------|------|-----|------|-------|-------|---------------------------------------------------------------------------------------------------------------------------------------------------------------|-------|
| A_23_P73142  | -1.0 | 1.1 | -1.1 | -15.2 | TACO1 | Homo sapiens translational activator of mitochondrially encoded cytochrome c oxidase I (TACO1), nuclear gene encoding mitochondrial protein, mRNA [NM_016360] | 51204 |
| A_24_P148590 | 2.0  | 2.2 | 1.1  | 1.2   | TACR1 | Homo sapiens tachykinin receptor 1 (TACR1), transcript variant short, mRNA [NM_015727]                                                                        | 6869  |
| A_23_P24135  | 2.2  | 2.3 | -1.1 | 1.2   | TACR2 | Homo sapiens tachykinin receptor 2 (TACR2), mRNA [NM_001057]                                                                                                  | 6865  |

|              |      |      |      |      |        |                                                                                                                                              |       |
|--------------|------|------|------|------|--------|----------------------------------------------------------------------------------------------------------------------------------------------|-------|
| A_23_P66664  | -1.0 | -1.7 | -1.5 | -2.1 | TADA2A | Homo sapiens transcriptional adaptor 2A (TADA2A), transcript variant 2, mRNA [NM_133439]                                                     | 6871  |
| A_23_P305016 | -1.2 | 3.0  | 2.4  | 2.1  | TADA3  | Homo sapiens transcriptional adaptor 3 (TADA3), transcript variant 1, mRNA [NM_006354]                                                       | 10474 |
| A_32_P192615 | 1.7  | 1.7  | 2.2  | 1.1  | TAF1   | Homo sapiens TAF1 RNA polymerase II, TATA box binding protein (TBP)-associated factor, 250kDa (TAF1), transcript variant 1, mRNA [NM_004606] | 6872  |

|              |      |      |      |      |       |                                                                                                                                            |      |
|--------------|------|------|------|------|-------|--------------------------------------------------------------------------------------------------------------------------------------------|------|
| A_23_P59202  | -1.3 | -2.4 | -1.3 | -1.3 | TAF11 | Homo sapiens TAF11 RNA polymerase II, TATA box binding protein (TBP)-associated factor, 28kDa (TAF11), mRNA [NM_005643]                    | 6882 |
| A_24_P928068 | 2.0  | -2.4 | 1.7  | 1.7  | TAF15 | Homo sapiens TAF15 RNA polymerase II, TATA box binding protein (TBP)-associated factor, 68kDa, mRNA (cDNA clone IMAGE:5266186). [BC048985] | 8148 |

|              |       |      |      |      |       |                                                                                                                     |       |
|--------------|-------|------|------|------|-------|---------------------------------------------------------------------------------------------------------------------|-------|
| A_23_P165891 | 4.2   | 1.0  | 2.0  | 4.6  | TAF1B | Homo sapiens TATA box binding protein (TBP)-associated factor, RNA polymerase I, B, 63kDa (TAF1B), mRNA [NM_005680] | 9014  |
| A_24_P261383 | -13.8 | -1.2 | -1.4 | -3.6 | TAF1D | Homo sapiens TATA box binding protein (TBP)-associated factor, RNA polymerase I, D, 41kDa (TAF1D), mRNA [NM_024116] | 79101 |

|              |     |     |     |      |       |                                                                                                                              |        |
|--------------|-----|-----|-----|------|-------|------------------------------------------------------------------------------------------------------------------------------|--------|
| A_23_P419850 | 2.6 | 2.1 | 4.2 | 2.2  | TAF1L | Homo sapiens TAF1 RNA polymerase II, TATA box binding protein (TBP)-associated factor, 210kDa-like (TAF1L), mRNA [NM_153809] | 138474 |
| A_24_P385119 | 2.7 | 2.6 | 1.2 | -1.2 | TAF2  | Homo sapiens TAF2 RNA polymerase II, TATA box binding protein (TBP)-associated factor, 150kDa (TAF2), mRNA [NM_003184]       | 6873   |

|              |      |      |      |      |      |                                                                                                                        |       |
|--------------|------|------|------|------|------|------------------------------------------------------------------------------------------------------------------------|-------|
| A_32_P153892 | -5.5 | -1.0 | -1.0 | -1.4 | TAF3 | Homo sapiens TAF3 RNA polymerase II, TATA box binding protein (TBP)-associated factor, 140kDa (TAF3), mRNA [NM_031923] | 83860 |
| A_23_P422922 | -1.7 | 1.4  | -2.1 | -1.2 | TAF3 | Homo sapiens TAF3 RNA polymerase II, TATA box binding protein (TBP)-associated factor, 140kDa (TAF3), mRNA [NM_031923] | 83860 |
| A_23_P80062  | 1.2  | 1.1  | 1.1  | -3.6 | TAF4 | Homo sapiens TAF4 RNA polymerase II, TATA box binding protein (TBP)-associated factor, 135kDa (TAF4), mRNA [NM_003185] | 6874  |



|             |      |     |      |      |       |                                                                                                                                                      |       |
|-------------|------|-----|------|------|-------|------------------------------------------------------------------------------------------------------------------------------------------------------|-------|
| A_23_P95718 | 1.1  | 1.4 | 2.1  | 1.4  | TAF4B | Homo sapiens TAF4b RNA polymerase II, TATA box binding protein (TBP)-associated factor, 105kDa (TAF4B), mRNA [NM_005640]                             | 6875  |
| A_23_P35309 | -3.8 | 2.1 | -1.6 | -1.1 | TAF5L | Homo sapiens TAF5-like RNA polymerase II, p300/CBP-associated factor (PCAF)-associated factor, 65kDa (TAF5L), transcript variant 1, mRNA [NM_014409] | 27097 |

|              |      |      |      |      |       |                                                                                                                                                         |       |
|--------------|------|------|------|------|-------|---------------------------------------------------------------------------------------------------------------------------------------------------------|-------|
| A_24_P376441 | -1.0 | -1.0 | -2.7 | -8.2 | TAF5L | Homo sapiens TAF5-like RNA polymerase II, p300/CBP-associated factor (PCAF)-associated factor, 65kDa (TAF5L), transcript variant 2, mRNA [NM_001025247] | 27097 |
| A_23_P47541  | 2.4  | 1.9  | 2.6  | 2.1  | TAF6L | Homo sapiens TAF6-like RNA polymerase II, p300/CBP-associated factor (PCAF)-associated factor, 65kDa (TAF6L), mRNA [NM_006473]                          | 10629 |

|              |      |      |      |      |       |                                                                                                                         |        |
|--------------|------|------|------|------|-------|-------------------------------------------------------------------------------------------------------------------------|--------|
| A_23_P254790 | -2.2 | -1.4 | -1.6 | -3.8 | TAF9B | Homo sapiens TAF9B RNA polymerase II, TATA box binding protein (TBP)-associated factor, 31kDa (TAF9B), mRNA [NM_015975] | 51616  |
| A_32_P627    | 15.0 | 2.8  | 11.6 | 3.7  | TAF9B | Homo sapiens cDNA FLJ23869 fis, clone LNG09860 . [AK074449]                                                             | 51616  |
| A_24_P354724 | 2.1  | 2.1  | 2.0  | 3.0  | TAGAP | Homo sapiens T-cell activation RhoGTPase activating protein (TAGAP), transcript variant 2, mRNA [NM_054114]             | 117289 |

|              |      |     |      |     |        |                                                                            |       |
|--------------|------|-----|------|-----|--------|----------------------------------------------------------------------------|-------|
| A_23_P80817  | -2.8 | 1.1 | -1.2 | 1.2 | TAGLN3 | Homo sapiens transgelin 3 (TAGLN3), transcript variant 1, mRNA [NM_013259] | 29114 |
| A_23_P63371  | 2.1  | 2.0 | -1.6 | 1.8 | TAL1   | Homo sapiens T-cell acute lymphocytic leukemia 1 (TAL1), mRNA [NM_003189]  | 6886  |
| A_23_P409449 | -1.1 | 1.5 | 2.1  | 1.3 | TAL2   | Homo sapiens T-cell acute lymphocytic leukemia 2 (TAL2), mRNA [NM_005421]  | 6887  |
| A_32_P28872  | 2.4  | 2.3 | 2.0  | 2.0 | TALDO1 | Homo sapiens transaldolase 1 (TALDO1), mRNA [NM_006755]                    | 6888  |

|              |      |      |      |      |       |                                                                                                              |       |
|--------------|------|------|------|------|-------|--------------------------------------------------------------------------------------------------------------|-------|
| A_24_P942068 | 1.7  | 2.4  | 1.9  | 1.3  | TANC2 | Homo sapiens tetratricopeptide repeat, ankyrin repeat and coiled-coil containing 2 (TANC2), mRNA [NM_025185] | 26115 |
| A_23_P402908 | -1.0 | -1.1 | -1.9 | -4.8 | TANC2 | Homo sapiens cDNA FLJ11824 fis, clone HEMBA1006492. [AK021886]                                               | 26115 |
| A_24_P257108 | 2.6  | 2.5  | 2.3  | 2.5  | TANK  | Homo sapiens TRAF family member-associated NFKB activator (TANK), transcript variant 2, mRNA [NM_133484]     | 10010 |

|              |     |      |      |      |       |                                                                                                                                      |       |
|--------------|-----|------|------|------|-------|--------------------------------------------------------------------------------------------------------------------------------------|-------|
| A_24_P937445 | 1.0 | -3.4 | -3.9 | 1.1  | TAOK1 | Homo sapiens cDNA FLJ14314 fis, clone PLACE3000350, weakly similar to SERINE/THREONINE-PROTEIN KINASE SULKU (EC 2.7.1.-). [AK024376] | 57551 |
| A_23_P218269 | 3.3 | 3.0  | -1.7 | 2.6  | TAOK2 | Homo sapiens TAO kinase 2 (TAOK2), transcript variant 1, mRNA [NM_016151]                                                            | 9344  |
| A_23_P368067 | 3.8 | -1.0 | -1.1 | -1.1 | TAP2  | Homo sapiens transporter 2, ATP-binding cassette, sub-family B (MDR/TAP) (TAP2), transcript variant 2, mRNA [NM_018833]              | 6891  |

|              |       |      |     |      |       |                                                                                                                         |      |
|--------------|-------|------|-----|------|-------|-------------------------------------------------------------------------------------------------------------------------|------|
| A_23_P214444 | 1.0   | -2.8 | 1.6 | -1.1 | TAP2  | Homo sapiens transporter 2, ATP-binding cassette, sub-family B (MDR/TAP) (TAP2), transcript variant 1, mRNA [NM_000544] | 6891 |
| A_23_P365719 | -16.4 | 1.6  | 1.4 | -1.0 | TAPBP | Homo sapiens TAP binding protein (tapasin) (TAPBP), transcript variant 1, mRNA [NM_003190]                              | 6892 |
| A_23_P259580 | 3.0   | 2.8  | 1.2 | 1.1  | TAPBP | Homo sapiens TAP binding protein (tapasin) (TAPBP), transcript variant 2, mRNA [NM_172208]                              | 6892 |

|              |      |      |      |      |        |                                                                                            |        |
|--------------|------|------|------|------|--------|--------------------------------------------------------------------------------------------|--------|
| A_23_P360291 | -7.3 | -1.4 | -2.2 | -3.4 | TAPBP  | TAP binding protein (tapasin) [Source:HGNC Symbol;Acc:11566] [ENST00000480730]             | 6892   |
| A_23_P315336 | -2.8 | 1.0  | -1.1 | -2.2 | TAPBP  | Homo sapiens TAP binding protein (tapasin) (TAPBP), transcript variant 3, mRNA [NM_172209] | 6892   |
| A_23_P36700  | 1.3  | -1.7 | -2.5 | -1.6 | TAPBPL | Homo sapiens TAP binding protein-like (TAPBPL), mRNA [NM_018009]                           | 55080  |
| A_23_P301372 | 1.3  | 1.3  | -2.3 | -1.2 | TAPT1  | Homo sapiens transmembrane anterior posterior transformation 1 (TAPT1), mRNA [NM_153365]   | 202018 |



|              |       |      |      |      |        |                                                                                                 |        |
|--------------|-------|------|------|------|--------|-------------------------------------------------------------------------------------------------|--------|
| A_24_P191750 | -12.1 | -3.8 | -1.3 | -1.2 | TAPT1  | Homo sapiens transmembrane anterior posterior transformation 1 (TAPT1), mRNA [NM_153365]        | 202018 |
| A_23_P52058  | -2.1  | -1.4 | -1.3 | -1.2 | TARBP1 | Homo sapiens TAR (HIV-1) RNA binding protein 1 (TARBP1), mRNA [NM_005646]                       | 6894   |
| A_23_P87603  | -1.4  | -1.4 | -4.2 | -1.5 | TARBP2 | Homo sapiens TAR (HIV-1) RNA binding protein 2 (TARBP2), transcript variant 1, mRNA [NM_134323] | 6895   |
| A_23_P129128 | -3.1  | 1.0  | -1.1 | -1.0 | TARSL2 | Homo sapiens threonyl-tRNA synthetase-like 2 (TARSL2), mRNA [NM_152334]                         | 123283 |

|              |      |      |      |      |         |                                                                                                |        |
|--------------|------|------|------|------|---------|------------------------------------------------------------------------------------------------|--------|
| A_23_P160890 | -2.6 | 1.5  | -5.0 | 1.6  | TAS1R1  | Homo sapiens taste receptor, type 1, member 1 (TAS1R1), transcript variant 2, mRNA [NM_138697] | 80835  |
| A_23_P160886 | 1.1  | 1.1  | 1.6  | -2.0 | TAS1R1  | Homo sapiens taste receptor, type 1, member 1 (TAS1R1), transcript variant 2, mRNA [NM_138697] | 80835  |
| A_23_P340312 | -1.1 | -2.3 | -1.0 | -1.0 | TAS2R19 | Homo sapiens taste receptor, type 2, member 19 (TAS2R19), mRNA [NM_176888]                     | 259294 |
| A_23_P382794 | -3.4 | 1.1  | -1.0 | 1.1  | TAS2R20 | Homo sapiens taste receptor, type 2, member 20 (TAS2R20), mRNA [NM_176889]                     | 259295 |

|              |     |      |     |      |         |                                                                            |        |
|--------------|-----|------|-----|------|---------|----------------------------------------------------------------------------|--------|
| A_23_P416191 | 1.5 | 3.0  | 1.5 | -1.2 | TAS2R31 | Homo sapiens taste receptor, type 2, member 31 (TAS2R31), mRNA [NM_176885] | 259290 |
| A_23_P359746 | 1.6 | 1.5  | 1.5 | -2.4 | TAS2R38 | Homo sapiens taste receptor, type 2, member 38 (TAS2R38), mRNA [NM_176817] | 5726   |
| A_23_P20101  | 1.4 | -2.6 | 1.3 | 1.4  | TAS2R4  | Homo sapiens taste receptor, type 2, member 4 (TAS2R4), mRNA [NM_016944]   | 50832  |
| A_24_P14902  | 1.1 | 1.6  | 1.0 | 2.2  | TAS2R42 | Homo sapiens taste receptor, type 2, member 42 (TAS2R42), mRNA [NM_181429] | 353164 |

|              |      |      |      |      |         |                                                                                              |        |
|--------------|------|------|------|------|---------|----------------------------------------------------------------------------------------------|--------|
| A_23_P371254 | -1.0 | -1.7 | -3.1 | -2.8 | TAS2R43 | Homo sapiens taste receptor, type 2, member 43 (TAS2R43), mRNA [NM_176884]                   | 259289 |
| A_23_P252100 | 1.2  | -3.5 | -1.6 | -3.1 | TAS2R5  | Homo sapiens taste receptor, type 2, member 5 (TAS2R5), mRNA [NM_018980]                     | 54429  |
| A_23_P367013 | -2.3 | 1.4  | -1.4 | -1.1 | TAS2R60 | Homo sapiens taste receptor, type 2, member 60 (TAS2R60), mRNA [NM_177437]                   | 338398 |
| A_23_P254978 | -1.7 | -1.4 | -4.7 | -7.8 | TATDN1  | Homo sapiens TatD DNase domain containing 1 (TATDN1), transcript variant 1, mRNA [NM_032026] | 83940  |

|             |      |      |      |      |         |                                                                                                                            |       |
|-------------|------|------|------|------|---------|----------------------------------------------------------------------------------------------------------------------------|-------|
| A_23_P57819 | 1.0  | -1.0 | -1.1 | -2.9 | TATDN2  | Homo sapiens TatD DNase domain containing 2 (TATDN2), mRNA [NM_014760]                                                     | 9797  |
| A_23_P38468 | 3.1  | 2.1  | 2.7  | 2.2  | TAX1BP3 | Homo sapiens Tax1 (human T-cell leukemia virus type I) binding protein 3 (TAX1BP3), transcript variant 1, mRNA [NM_014604] | 30851 |
| A_23_P62371 | -1.1 | 1.2  | -1.7 | -2.3 | TAZ     | Homo sapiens tafazzin (TAZ), nuclear gene encoding mitochondrial protein, transcript variant 1, mRNA [NM_000116]           | 6901  |

|              |      |      |      |      |          |                                                                                                |       |
|--------------|------|------|------|------|----------|------------------------------------------------------------------------------------------------|-------|
| A_23_P73023  | -2.1 | 1.4  | 1.2  | 1.1  | TBC1D1   | Homo sapiens TBC1 (tre-2/USP6, BUB2, cdc16) domain family, member 1 (TBC1D1), mRNA [NM_015173] | 23216 |
| A_23_P166421 | 2.6  | 2.5  | 2.6  | -1.0 | TBC1D10A | Homo sapiens TBC1 domain family, member 10A (TBC1D10A), transcript variant 2, mRNA [NM_031937] | 83874 |
| A_23_P22382  | -2.9 | -6.5 | -5.2 | -3.2 | TBC1D10B | Homo sapiens TBC1 domain family, member 10B (TBC1D10B), mRNA [NM_015527]                       | 26000 |

|              |      |      |      |      |          |                                                                                              |        |
|--------------|------|------|------|------|----------|----------------------------------------------------------------------------------------------|--------|
| A_24_P392201 | -2.9 | -1.8 | -1.8 | -1.2 | TBC1D10C | Homo sapiens TBC1 domain family, member 10C (TBC1D10C), mRNA [NM_198517]                     | 374403 |
| A_24_P6494   | -2.3 | -1.0 | -1.1 | -1.0 | TBC1D12  | Homo sapiens TBC1 domain family, member 12 (TBC1D12), mRNA [NM_015188]                       | 23232  |
| A_23_P155830 | -1.1 | -1.1 | -1.3 | -2.1 | TBC1D14  | Homo sapiens TBC1 domain family, member 14 (TBC1D14), transcript variant 1, mRNA [NM_020773] | 57533  |

|              |     |      |      |      |         |                                                                                              |        |
|--------------|-----|------|------|------|---------|----------------------------------------------------------------------------------------------|--------|
| A_24_P120352 | 2.2 | 1.1  | -1.0 | -1.0 | TBC1D14 | Homo sapiens TBC1 domain family, member 14 (TBC1D14), transcript variant 1, mRNA [NM_020773] | 57533  |
| A_23_P428326 | 1.8 | -2.7 | -2.5 | -2.6 | TBC1D16 | Homo sapiens mRNA; cDNA DKFZp451F1311 (from clone DKFZp451F1311). [CR936670]                 | 125058 |
| A_23_P130731 | 1.2 | -1.6 | -1.6 | -2.3 | TBC1D17 | Homo sapiens TBC1 domain family, member 17 (TBC1D17), transcript variant 1, mRNA [NM_024682] | 79735  |



|              |      |      |      |      |         |                                                                                |        |
|--------------|------|------|------|------|---------|--------------------------------------------------------------------------------|--------|
| A_23_P136196 | 3.4  | 3.3  | 1.4  | 1.0  | TBC1D19 | Homo sapiens TBC1 domain family, member 19 (TBC1D19), mRNA [NM_018317]         | 55296  |
| A_24_P392958 | -2.2 | -2.0 | -3.3 | -1.5 | TBC1D20 | Homo sapiens TBC1 domain family, member 20 (TBC1D20), mRNA [NM_144628]         | 128637 |
| A_23_P354187 | 1.5  | -1.4 | 1.1  | -2.0 | TBC1D20 | TBC1 domain family, member 20 [Source:HGNC Symbol;Acc:16133] [ENST00000461304] | 128637 |
| A_23_P408206 | -3.7 | 1.1  | 1.1  | 1.2  | TBC1D21 | Homo sapiens TBC1 domain family, member 21 (TBC1D21), mRNA [NM_153356]         | 161514 |

|              |      |      |      |      |          |                                                                                               |        |
|--------------|------|------|------|------|----------|-----------------------------------------------------------------------------------------------|--------|
| A_23_P159688 | 1.0  | -2.7 | -1.1 | -1.8 | TBC1D25  | Homo sapiens TBC1 domain family, member 25 (TBC1D25), mRNA [NM_002536]                        | 4943   |
| A_24_P168994 | -2.1 | -1.8 | -1.1 | 1.2  | TBC1D26  | Homo sapiens TBC1 domain family, member 26 (TBC1D26), mRNA [NM_178571]                        | 353149 |
| A_32_P24372  | -2.9 | 1.1  | 1.0  | 1.0  | TBC1D3B  | Homo sapiens TBC1 domain family, member 3B (TBC1D3B), mRNA [NM_001001417]                     | 414059 |
| A_24_P838947 | 1.7  | 2.5  | -2.0 | -1.9 | TBC1D3P5 | Homo sapiens TBC1 domain family, member 3H pseudogene (LOC440419), non-coding RNA [NR_033892] | 440419 |

|              |      |      |      |      |         |                                                                                                                 |       |
|--------------|------|------|------|------|---------|-----------------------------------------------------------------------------------------------------------------|-------|
| A_23_P111273 | 1.4  | 1.9  | 2.0  | -1.1 | TBC1D7  | Homo sapiens TBC1 domain family, member 7 (TBC1D7), transcript variant 1, mRNA [NM_016495]                      | 51256 |
| A_24_P576445 | -1.1 | 1.0  | -1.8 | -3.8 | TBC1D8  | Homo sapiens cDNA FLJ40805 fis, clone TRACH2009060. [AK098124]                                                  | 11138 |
| A_23_P251611 | 1.0  | 1.0  | -7.3 | 1.1  | TBC1D9B | Homo sapiens TBC1 domain family, member 9B (with GRAM domain) (TBC1D9B), transcript variant 1, mRNA [NM_198868] | 23061 |
| A_23_P167698 | 21.5 | 35.8 | 19.2 | 20.5 | TBCA    | Homo sapiens tubulin folding cofactor A (TBCA), mRNA [NM_004607]                                                | 6902  |

|              |      |      |      |      |        |                                                                                        |       |
|--------------|------|------|------|------|--------|----------------------------------------------------------------------------------------|-------|
| A_23_P121345 | -6.6 | -1.0 | -1.1 | -1.0 | TBCCD1 | Homo sapiens TBCC domain containing 1 (TBCCD1), transcript variant 2, mRNA [NM_018138] | 55171 |
| A_23_P100602 | -8.7 | 1.1  | 1.4  | 1.4  | TBCD   | Homo sapiens tubulin folding cofactor D (TBCD), mRNA [NM_005993]                       | 6904  |
| A_24_P275873 | 2.2  | -1.1 | -1.2 | 1.8  | TBCD   | Homo sapiens tubulin folding cofactor D (TBCD), mRNA [NM_005993]                       | 6904  |
| A_23_P130169 | -1.9 | -1.4 | -2.4 | -1.4 | TBKBP1 | Homo sapiens TBK1 binding protein 1 (TBKBP1), mRNA [NM_014726]                         | 9755  |
| A_24_P159515 | 4.0  | 5.0  | 1.6  | 1.2  | TBKBP1 | Homo sapiens TBK1 binding protein 1 (TBKBP1), mRNA [NM_014726]                         | 9755  |

|              |      |      |      |      |         |                                                                                               |       |
|--------------|------|------|------|------|---------|-----------------------------------------------------------------------------------------------|-------|
| A_24_P417162 | -2.7 | -1.1 | 1.0  | -2.3 | TBL1X   | Homo sapiens transducin (beta)-like 1X-linked (TBL1X), transcript variant 1, mRNA [NM_005647] | 6907  |
| A_24_P128880 | -2.9 | 2.1  | 2.0  | 2.2  | TBL1XR1 | Homo sapiens transducin (beta)-like 1 X-linked receptor 1 (TBL1XR1), mRNA [NM_024665]         | 79718 |
| A_23_P134395 | -2.2 | -2.1 | -2.1 | -1.5 | TBL2    | Homo sapiens transducin (beta)-like 2 (TBL2), mRNA [NM_012453]                                | 26608 |
| A_23_P106720 | -1.4 | -1.3 | -2.0 | -2.1 | TBL3    | Homo sapiens transducin (beta)-like 3 (TBL3), mRNA [NM_006453]                                | 10607 |

|             |      |      |      |      |       |                                                                                                          |       |
|-------------|------|------|------|------|-------|----------------------------------------------------------------------------------------------------------|-------|
| A_23_P5685  | 1.0  | -3.2 | -1.0 | -1.1 | TBR1  | Homo sapiens T-box, brain, 1 (TBR1), mRNA [NM_006593]                                                    | 10716 |
| A_23_P98463 | -2.3 | -1.0 | -1.1 | -1.1 | TBRG1 | Homo sapiens transforming growth factor beta regulator 1 (TBRG1), transcript variant 1, mRNA [NM_032811] | 84897 |
| A_24_P21752 | 2.1  | 2.2  | 2.4  | 1.8  | TBRG1 | Homo sapiens transforming growth factor beta regulator 1 (TBRG1), transcript variant 1, mRNA [NM_032811] | 84897 |

|              |      |      |      |      |       |                                                                                                          |        |
|--------------|------|------|------|------|-------|----------------------------------------------------------------------------------------------------------|--------|
| A_23_P215658 | 2.9  | 4.2  | 1.6  | 1.6  | TBRG4 | Homo sapiens transforming growth factor beta regulator 4 (TBRG4), transcript variant 2, mRNA [NM_030900] | 9238   |
| A_24_P197794 | -1.0 | -1.1 | -5.3 | -2.9 | TBRG4 | Homo sapiens mRNA for KIAA0948 protein, partial cds. [AB023165]                                          | 9238   |
| A_23_P211345 | 1.8  | -4.1 | -2.0 | -1.1 | TBX1  | Homo sapiens T-box 1 (TBX1), transcript variant C, mRNA [NM_080647]                                      | 6899   |
| A_32_P538017 | 1.4  | 1.2  | 1.1  | 2.1  | TBX10 | Homo sapiens T-box 10 (TBX10), mRNA [NM_005995]                                                          | 347853 |
| A_23_P412962 | 1.0  | -6.8 | -1.0 | 1.0  | TBX19 | Homo sapiens T-box 19 (TBX19), mRNA [NM_005149]                                                          | 9095   |

|              |      |     |      |      |        |                                                                                                   |      |
|--------------|------|-----|------|------|--------|---------------------------------------------------------------------------------------------------|------|
| A_23_P164451 | 1.4  | 1.6 | -2.0 | 1.4  | TBX2   | Homo sapiens T-box 2 (TBX2), mRNA [NM_005994]                                                     | 6909 |
| A_24_P30557  | -3.5 | 1.1 | 1.8  | 1.1  | TBX5   | Homo sapiens T-box 5 (TBX5), transcript variant 1, mRNA [NM_000192]                               | 6910 |
| A_23_P90357  | 2.3  | 1.3 | 1.3  | 1.6  | TBXA2R | Homo sapiens thromboxane A2 receptor (TBXA2R), transcript variant a, mRNA [NM_001060]             | 6915 |
| A_24_P274814 | 2.2  | 2.6 | 2.4  | -1.2 | TBXAS1 | Homo sapiens thromboxane A synthase 1 (platelet) (TBXAS1), transcript variant 2, mRNA [NM_030984] | 6916 |



|              |      |      |      |      |        |                                                                                                         |      |
|--------------|------|------|------|------|--------|---------------------------------------------------------------------------------------------------------|------|
| A_32_P212886 | 1.0  | -1.0 | -1.1 | -2.4 | TBXAS1 | Homo sapiens thromboxane A synthase 1 (platelet) (TBXAS1), transcript variant 5, mRNA [NM_001166254]    | 6916 |
| A_23_P107051 | -7.6 | 2.4  | -1.1 | -2.3 | TCAP   | Homo sapiens titin-cap (telethonin) (TCAP), mRNA [NM_003673]                                            | 8557 |
| A_23_P132444 | 3.1  | 1.1  | -1.2 | -1.6 | TCEA1  | Homo sapiens transcription elongation factor A (SII), 1 (TCEA1), transcript variant 1, mRNA [NM_006756] | 6917 |
| A_24_P327886 | -2.8 | 1.5  | 1.4  | -1.2 | TCEA3  | Homo sapiens transcription elongation factor A (SII), 3 (TCEA3), mRNA [NM_003196]                       | 6920 |

|              |      |     |     |      |        |                                                                                                                 |       |
|--------------|------|-----|-----|------|--------|-----------------------------------------------------------------------------------------------------------------|-------|
| A_23_P73801  | -1.1 | 2.3 | 2.1 | -1.0 | TCEAL1 | Homo sapiens transcription elongation factor A (SII)-like 1 (TCEAL1), transcript variant 3, mRNA [NM_001006640] | 9338  |
| A_23_P434442 | 2.1  | 2.1 | 2.1 | 2.1  | TCEAL3 | Homo sapiens transcription elongation factor A (SII)-like 3 (TCEAL3), transcript variant 1, mRNA [NM_001006933] | 85012 |
| A_23_P259166 | 2.3  | 2.2 | 2.4 | 1.2  | TCEAL4 | Homo sapiens transcription elongation factor A (SII)-like 4 (TCEAL4), transcript variant 1, mRNA [NM_024863]    | 79921 |

|              |      |     |     |      |         |                                                                                                                                     |        |
|--------------|------|-----|-----|------|---------|-------------------------------------------------------------------------------------------------------------------------------------|--------|
| A_24_P49106  | 1.2  | 3.7 | 1.5 | -1.3 | TCEAL7  | Homo sapiens transcription elongation factor A (SII)-like 7 (TCEAL7), mRNA [NM_152278]                                              | 56849  |
| A_24_P196469 | -2.2 | 1.0 | 1.0 | -1.0 | TCEANC  | transcription elongation factor A (SII) N-terminal and central domain containing [Source:HGNC Symbol;Acc:28277] [ENST00000467590]   | 170082 |
| A_24_P93728  | 2.1  | 2.3 | 1.3 | 2.6  | TCEANC2 | transcription elongation factor A (SII) N-terminal and central domain containing 2 [Source:HGNC Symbol;Acc:26494] [ENST00000498272] | 127428 |

|              |      |      |      |      |       |                                                                                                                                            |      |
|--------------|------|------|------|------|-------|--------------------------------------------------------------------------------------------------------------------------------------------|------|
| A_24_P243881 | -3.0 | -2.9 | -2.9 | -5.4 | TCEB1 | Homo sapiens transcription elongation factor B (SIII), polypeptide 1 (15kDa, elongin C) (TCEB1), transcript variant 3, mRNA [NM_001204858] | 6921 |
| A_23_P312181 | 5.3  | 3.0  | 5.5  | 2.9  | TCEB2 | Homo sapiens transcription elongation factor B (SIII), polypeptide 2 (18kDa, elongin B) (TCEB2), transcript variant 2, mRNA [NM_207013]    | 6923 |

|              |      |      |      |      |        |                                                                                                                    |       |
|--------------|------|------|------|------|--------|--------------------------------------------------------------------------------------------------------------------|-------|
| A_23_P74097  | -1.5 | -2.3 | -1.1 | 1.0  | TCEB3  | Homo sapiens transcription elongation factor B (SIII), polypeptide 3 (110kDa, elongin A) (TCEB3), mRNA [NM_003198] | 6924  |
| A_23_P141706 | 1.1  | 1.0  | 1.5  | -5.7 | TCEB3B | Homo sapiens transcription elongation factor B polypeptide 3B (elongin A2) (TCEB3B), mRNA [NM_016427]              | 51224 |
| A_24_P349965 | 1.0  | 1.0  | 2.3  | 1.1  | TCF19  | Homo sapiens transcription factor 19 (TCF19), transcript variant 1, mRNA [NM_007109]                               | 6941  |

|              |      |      |      |      |       |                                                                                            |        |
|--------------|------|------|------|------|-------|--------------------------------------------------------------------------------------------|--------|
| A_23_P424316 | -2.4 | 1.0  | -1.0 | 1.0  | TCF20 | Homo sapiens transcription factor 20 (AR1) (TCF20), transcript variant 1, mRNA [NM_005650] | 6942   |
| A_23_P156890 | -1.0 | 1.0  | 1.0  | -2.9 | TCF21 | Homo sapiens transcription factor 21 (TCF21), transcript variant 2, mRNA [NM_003206]       | 6943   |
| A_24_P237936 | -2.0 | -1.8 | -2.0 | -1.3 | TCF23 | Homo sapiens transcription factor 23 (TCF23), mRNA [NM_175769]                             | 150921 |
| A_23_P49220  | 1.7  | 2.2  | 1.6  | 1.7  | TCF25 | Homo sapiens transcription factor 25 (basic helix-loop-helix) (TCF25), mRNA [NM_014972]    | 22980  |

|              |      |     |      |      |      |                                                                                                                                          |      |
|--------------|------|-----|------|------|------|------------------------------------------------------------------------------------------------------------------------------------------|------|
| A_24_P365365 | 1.4  | 1.4 | 2.3  | 1.4  | TCF3 | Homo sapiens transcription factor 3 (E2A immunoglobulin enhancer binding factors E12/E47) (TCF3), transcript variant 1, mRNA [NM_003200] | 6929 |
| A_23_P67708  | 2.6  | 1.1 | -1.5 | 1.5  | TCF3 | Homo sapiens transcription factor 3 (E2A immunoglobulin enhancer binding factors E12/E47) (TCF3), transcript variant 1, mRNA [NM_003200] | 6929 |
| A_23_P27332  | -8.8 | 1.3 | 1.3  | -1.1 | TCF4 | Homo sapiens transcription factor 4 (TCF4), transcript variant 2, mRNA [NM_003199]                                                       | 6925 |

|              |      |      |      |     |        |                                                                                                                        |       |
|--------------|------|------|------|-----|--------|------------------------------------------------------------------------------------------------------------------------|-------|
| A_23_P142872 | 1.1  | -3.7 | 1.0  | 1.1 | TCF7L1 | Homo sapiens transcription factor 7-like 1 (T-cell specific, HMG-box) (TCF7L1), mRNA [NM_031283]                       | 83439 |
| A_23_P127013 | -1.0 | -6.9 | -1.0 | 1.0 | TCF7L2 | Homo sapiens transcription factor 7-like 2 (T-cell specific, HMG-box) (TCF7L2), transcript variant 2, mRNA [NM_030756] | 6934  |
| A_23_P357717 | 2.9  | 1.1  | 1.4  | 1.1 | TCL1A  | Homo sapiens T-cell leukemia/lymphoma 1A (TCL1A), transcript variant 1, mRNA [NM_021966]                               | 8115  |



|              |      |      |      |     |      |                                                                                                       |       |
|--------------|------|------|------|-----|------|-------------------------------------------------------------------------------------------------------|-------|
| A_23_P363196 | 1.1  | 2.5  | 1.0  | 1.3 | TCL6 | Homo sapiens TCL6a2 mRNA for T-cell leukemia/lymphoma 6 ORF141, complete cds, clone:pPLA2. [AB035333] | 27004 |
| A_23_P363203 | -1.0 | -9.8 | -1.0 | 1.0 | TCL6 | Homo sapiens T-cell leukemia/lymphoma 6 (non-protein coding) (TCL6), non-coding RNA [NR_028288]       | 27004 |
| A_23_P40611  | 2.3  | 2.3  | 2.1  | 2.3 | TCN2 | Homo sapiens transcobalamin II (TCN2), transcript variant 1, mRNA [NM_000355]                         | 6948  |

|              |      |      |      |      |       |                                                                                                           |      |
|--------------|------|------|------|------|-------|-----------------------------------------------------------------------------------------------------------|------|
| A_24_P243396 | 2.1  | 1.7  | 1.3  | -1.2 | TCOF1 | Homo sapiens Treacher Collins-Franceschetti syndrome 1 (TCOF1), transcript variant 3, mRNA [NM_001008657] | 6949 |
| A_23_P310317 | 1.6  | 1.9  | 3.4  | -1.1 | TCOF1 | Homo sapiens Treacher Collins-Franceschetti syndrome 1 (TCOF1), transcript variant 4, mRNA [NM_001135243] | 6949 |
| A_32_P501400 | -1.8 | -4.1 | -1.6 | 1.1  | TCP1  | Homo sapiens t-complex 1 (TCP1), transcript variant 1, mRNA [NM_030752]                                   | 6950 |
| A_24_P75157  | 1.5  | 1.6  | -2.2 | 1.0  | TCP10 | Homo sapiens t-complex 10 homolog (mouse) (TCP10), mRNA [NM_004610]                                       | 6953 |

|              |      |      |      |      |         |                                                                                  |        |
|--------------|------|------|------|------|---------|----------------------------------------------------------------------------------|--------|
| A_24_P202905 | 1.1  | 3.7  | -1.2 | -1.1 | TCP10L  | Homo sapiens t-complex 10 (mouse)-like (TCP10L), mRNA [NM_144659]                | 140290 |
| A_23_P350555 | -5.8 | 2.4  | 1.8  | -1.2 | TCP10L  | Homo sapiens t-complex 10 (mouse)-like (TCP10L), mRNA [NM_144659]                | 140290 |
| A_23_P419107 | 1.1  | -3.5 | -1.1 | 1.1  | TCP11L2 | Homo sapiens t-complex 11 (mouse)-like 2 (TCP11L2), mRNA [NM_152772]             | 255394 |
| A_23_P58002  | -2.8 | -1.6 | 1.1  | 1.2  | TCTA    | Homo sapiens T-cell leukemia translocation altered gene (TCTA), mRNA [NM_022171] | 6988   |

|              |     |      |      |      |          |                                                                                  |        |
|--------------|-----|------|------|------|----------|----------------------------------------------------------------------------------|--------|
| A_24_P123166 | 1.3 | -1.6 | -1.4 | 2.0  | TCTA     | Homo sapiens T-cell leukemia translocation altered gene (TCTA), mRNA [NM_022171] | 6988   |
| A_32_P203099 | 1.3 | -1.0 | -3.2 | 1.0  | TCTE1    | Homo sapiens t-complex-associated-testis-expressed 1 (TCTE1), mRNA [NM_182539]   | 202500 |
| A_32_P38286  | 5.5 | 4.6  | 8.4  | 4.6  | TCTE3    | Homo sapiens t-complex-associated-testis-expressed 3 (TCTE3), mRNA [NM_174910]   | 6991   |
| A_23_P21162  | 1.0 | -3.2 | -1.1 | -1.0 | TCTEX1D2 | Homo sapiens Tctex1 domain containing 2 (TCTEX1D2), mRNA [NM_152773]             | 255758 |

|              |      |      |      |     |       |                                                                                             |       |
|--------------|------|------|------|-----|-------|---------------------------------------------------------------------------------------------|-------|
| A_23_P76402  | 1.6  | 1.6  | -4.0 | 1.6 | TCTN1 | Homo sapiens tectonic family member 1 (TCTN1), transcript variant 3, mRNA [NM_024549]       | 79600 |
| A_23_P117623 | -2.0 | 1.0  | -1.1 | 1.4 | TDP1  | Homo sapiens tyrosyl-DNA phosphodiesterase 1 (TDP1), transcript variant 1, mRNA [NM_018319] | 55775 |
| A_23_P8311   | 1.0  | -2.2 | -1.1 | 1.0 | TDP2  | Homo sapiens tyrosyl-DNA phosphodiesterase 2 (TDP2), mRNA [NM_016614]                       | 51567 |
| A_23_P97835  | -7.9 | 1.2  | 1.2  | 1.4 | TDRD1 | Homo sapiens tudor domain containing protein 1 (TDRD1) mRNA, complete cds. [AF285606]       | 56165 |

|              |     |       |      |      |        |                                                                                          |        |
|--------------|-----|-------|------|------|--------|------------------------------------------------------------------------------------------|--------|
| A_32_P7974   | 2.5 | 2.4   | 1.7  | 1.5  | TDRD10 | Homo sapiens tudor domain containing 10 (TDRD10), transcript variant 2, mRNA [NM_182499] | 126668 |
| A_32_P188825 | 1.2 | -36.3 | 1.1  | -1.5 | TDRD12 | Homo sapiens tudor domain containing 12 (TDRD12), mRNA [NM_00110822]                     | 91646  |
| A_32_P79763  | 1.1 | 1.0   | -1.1 | -5.5 | TDRD12 | Homo sapiens cDNA FLJ13072 fis, clone NT2RP3001844. [AK023134]                           | 91646  |
| A_32_P187617 | 1.0 | 2.2   | -1.0 | 1.1  | TDRD3  | Homo sapiens tudor domain containing 3 (TDRD3), transcript variant 2, mRNA [NM_030794]   | 81550  |

|              |      |      |      |      |       |                                                                                                          |        |
|--------------|------|------|------|------|-------|----------------------------------------------------------------------------------------------------------|--------|
| A_23_P123672 | -2.7 | -1.0 | -1.3 | -1.2 | TDRD7 | Homo sapiens tudor domain containing 7 (TDRD7), mRNA [NM_014290]                                         | 23424  |
| A_32_P208350 | 2.1  | 1.0  | -1.1 | -1.2 | TDRD9 | Homo sapiens tudor domain containing 9 (TDRD9), mRNA [NM_153046]                                         | 122402 |
| A_23_P429340 | -1.5 | 1.2  | -3.3 | 1.1  | TEAD1 | Homo sapiens TEA domain family member 1 (SV40 transcriptional enhancer factor) (TEAD1), mRNA [NM_021961] | 7003   |
| A_23_P119344 | 2.5  | -1.4 | 3.3  | 2.9  | TEAD2 | Homo sapiens TEA domain family member 2 (TEAD2), mRNA [NM_003598]                                        | 8463   |

|              |       |      |      |      |        |                                                                                                                      |        |
|--------------|-------|------|------|------|--------|----------------------------------------------------------------------------------------------------------------------|--------|
| A_24_P37712  | -1.9  | 2.3  | 1.6  | 1.9  | TEC    | Homo sapiens<br>tec<br>protein<br>tyrosine<br>kinase<br>(TEC),<br>mRNA<br>[NM_003215]                                | 7006   |
| A_23_P97826  | -1.8  | -1.2 | -2.1 | -3.4 | TECTB  | Homo sapiens<br>tectrin<br>beta<br>(TECTB),<br>mRNA<br>[NM_058222]                                                   | 6975   |
| A_23_P411947 | -14.2 | -1.2 | 1.1  | 1.1  | TEDDM1 | Homo sapiens<br>transmem<br>brane<br>epididyma<br>l protein 1<br>(TEDDM1),<br>mRNA<br>[NM_172000]                    | 127670 |
| A_23_P91757  | 2.6   | 2.9  | 3.9  | 2.8  | TEF    | Homo sapiens<br>thyrotroph<br>ic<br>embryonic<br>factor<br>(TEF),<br>transcript<br>variant 1,<br>mRNA<br>[NM_003216] | 7008   |



|              |      |      |      |      |         |                                                                                                                      |           |
|--------------|------|------|------|------|---------|----------------------------------------------------------------------------------------------------------------------|-----------|
| A_32_P94199  | -3.7 | 1.1  | -1.1 | -1.1 | TEKT4P2 | Homo sapiens tektin 4 pseudogene 2 (TEKT4P2), transcript variant 3, non-coding RNA [NR_038329]                       | 100132288 |
| A_23_P206237 | 1.7  | 1.5  | -4.9 | 1.4  | TELO2   | Homo sapiens TEL2, telomere maintenance 2, homolog (S. cerevisiae) (TELO2), mRNA [NM_016111]                         | 9894      |
| A_23_P151297 | 1.0  | -1.5 | 2.0  | 2.3  | TENC1   | Homo sapiens tensin like C1 domain containing phosphatase (tensin 2) (TENC1), transcript variant 1, mRNA [NM_015319] | 23371     |

|              |      |     |      |      |       |                                                                                                                   |        |
|--------------|------|-----|------|------|-------|-------------------------------------------------------------------------------------------------------------------|--------|
| A_24_P75183  | -1.4 | 1.5 | -3.7 | -1.4 | TEPP  | Homo sapiens testis, prostate and placenta expressed (TEPP), transcript variant 2, mRNA [NM_199456]               | 374739 |
| A_23_P216149 | 4.2  | 4.0 | 2.6  | 3.0  | TERF1 | Homo sapiens telomeric repeat binding factor (NIMA-interacting) 1 (TERF1), transcript variant 1, mRNA [NM_017489] | 7013   |
| A_23_P417200 | -1.9 | 2.0 | 3.3  | 1.0  | TERF2 | Homo sapiens telomeric repeat binding factor 2 (TERF2), mRNA [NM_005652]                                          | 7014   |
| A_24_P341882 | 3.2  | 3.4 | 3.2  | 1.6  | TESK1 | Homo sapiens testis-specific kinase 1 (TESK1), mRNA [NM_006285]                                                   | 7016   |

|              |      |      |      |      |       |                                                                                              |        |
|--------------|------|------|------|------|-------|----------------------------------------------------------------------------------------------|--------|
| A_23_P169178 | -1.1 | 1.2  | 1.2  | -2.1 | TESK1 | Homo sapiens testis-specific kinase 1 (TESK1), mRNA [NM_006285]                              | 7016   |
| A_23_P322756 | -6.0 | 1.1  | 1.0  | 1.0  | TET1  | Homo sapiens tet methylcytosine dioxygenase 1 (TET1), mRNA [NM_030625]                       | 80312  |
| A_24_P932233 | 2.9  | 2.8  | 2.7  | 2.2  | TET2  | Homo sapiens tet methylcytosine dioxygenase 2 (TET2), transcript variant 2, mRNA [NM_017628] | 54790  |
| A_32_P542874 | -2.7 | -1.0 | -1.1 | -1.0 | TET3  | Homo sapiens tet methylcytosine dioxygenase 3 (TET3), mRNA [NM_144993]                       | 200424 |

|              |      |      |      |      |        |                                                                                    |       |
|--------------|------|------|------|------|--------|------------------------------------------------------------------------------------|-------|
| A_23_P112412 | -1.5 | -1.0 | -2.6 | -1.4 | TEX10  | Homo sapiens testis expressed 10 (TEX10), transcript variant 1, mRNA [NM_017746]   | 54881 |
| A_23_P130906 | -1.7 | -1.1 | -1.1 | -2.6 | TEX101 | Homo sapiens testis expressed 101 (TEX101), transcript variant 1, mRNA [NM_031451] | 83639 |
| A_23_P150362 | 1.1  | -4.0 | 1.1  | 1.1  | TEX12  | Homo sapiens testis expressed 12 (TEX12), mRNA [NM_031275]                         | 56158 |
| A_23_P73637  | -1.1 | -1.1 | -2.8 | -1.3 | TEX13B | Homo sapiens testis expressed 13B (TEX13B), mRNA [NM_031273]                       | 56156 |

|              |      |      |      |      |        |                                                                                    |        |
|--------------|------|------|------|------|--------|------------------------------------------------------------------------------------|--------|
| A_23_P54996  | 1.1  | 1.0  | 1.0  | -7.2 | TEX14  | Homo sapiens testis expressed 14 (TEX14), transcript variant 1, mRNA [NM_198393]   | 56155  |
| A_23_P4036   | 2.8  | 2.6  | 1.5  | -1.9 | TEX2   | Homo sapiens testis expressed 2 (TEX2), mRNA [NM_018469]                           | 55852  |
| A_23_P251548 | 1.1  | -3.2 | -1.0 | -1.0 | TEX261 | Homo sapiens testis expressed 261 (TEX261), mRNA [NM_144582]                       | 113419 |
| A_23_P41009  | -1.3 | -2.1 | -1.5 | 1.1  | TEX264 | Homo sapiens testis expressed 264 (TEX264), transcript variant 1, mRNA [NM_015926] | 51368  |

|              |      |      |      |      |        |                                                                                                                       |      |
|--------------|------|------|------|------|--------|-----------------------------------------------------------------------------------------------------------------------|------|
| A_23_P257936 | 2.3  | 1.7  | -2.5 | -4.8 | TEX28  | Homo sapiens testis expressed 28 (TEX28), transcript variant 2, mRNA [NM_001586]                                      | 1527 |
| A_23_P212500 | 1.1  | 1.1  | -2.2 | 1.0  | TF     | Homo sapiens transferrin (TF), mRNA [NM_001063]                                                                       | 7018 |
| A_24_P20954  | -1.0 | -1.1 | -2.6 | -1.0 | TFAP2B | Homo sapiens transcription factor AP-2 beta (activating enhancer binding protein 2 beta) (TFAP2B), mRNA [NM_003221]   | 7021 |
| A_23_P120472 | 2.1  | 2.1  | 2.0  | 1.3  | TFAP2C | Homo sapiens transcription factor AP-2 gamma (activating enhancer binding protein 2 gamma) (TFAP2C), mRNA [NM_003222] | 7022 |

|              |      |      |      |      |        |                                                                                                                       |       |
|--------------|------|------|------|------|--------|-----------------------------------------------------------------------------------------------------------------------|-------|
| A_23_P386973 | 1.4  | -2.2 | -7.8 | -9.4 | TFAP2D | Homo sapiens transcription factor AP-2 delta (activating enhancer binding protein 2 delta) (TFAP2D), mRNA [NM_172238] | 83741 |
| A_23_P347528 | -1.0 | -2.9 | -1.2 | -1.1 | TFCP2  | Homo sapiens transcription factor CP2 (TFCP2), transcript variant 1, mRNA [NM_005653]                                 | 7024  |
| A_23_P169789 | 1.1  | 1.1  | 1.1  | -2.6 | TFCP2  | Homo sapiens transcription factor CP2 (TFCP2), transcript variant 1, mRNA [NM_005653]                                 | 7024  |
| A_32_P199301 | 1.9  | -2.1 | -1.1 | -1.4 | TFDP1  | Homo sapiens transcription factor Dp-1 (TFDP1), transcript variant 1, mRNA [NM_007111]                                | 7027  |

|              |      |      |      |      |       |                                                                                                                     |       |
|--------------|------|------|------|------|-------|---------------------------------------------------------------------------------------------------------------------|-------|
| A_23_P166964 | -5.8 | -1.1 | -1.2 | -1.2 | TFDP2 | Homo sapiens transcription factor Dp-2 (E2F dimerization partner 2) (TFDP2), transcript variant 2, mRNA [NM_006286] | 7029  |
| A_23_P368729 | -1.3 | -1.5 | -1.8 | -3.7 | TFEB  | Homo sapiens transcription factor EB (TFEB), transcript variant 1, mRNA [NM_007162]                                 | 7942  |
| A_32_P184394 | -2.7 | 1.0  | -1.1 | -1.1 | TFEC  | Homo sapiens transcription factor EC (TFEC), transcript variant 1, mRNA [NM_012252]                                 | 22797 |
| A_23_P68759  | 1.5  | 2.9  | 1.4  | 1.5  | TFF1  | Homo sapiens trefoil factor 1 (TFF1), mRNA [NM_003225]                                                              | 7031  |



|              |      |      |      |      |        |                                                                                                  |       |
|--------------|------|------|------|------|--------|--------------------------------------------------------------------------------------------------|-------|
| A_23_P57364  | 1.6  | 2.1  | -1.0 | 2.0  | TFF2   | Homo sapiens trefoil factor 2 (TFF2), mRNA [NM_005423]                                           | 7032  |
| A_23_P120839 | 1.6  | -2.2 | 1.6  | 1.3  | TFIP11 | Homo sapiens tuftelin interacting protein 11 (TFIP11), transcript variant 1, mRNA [NM_001008697] | 24144 |
| A_23_P393620 | -1.0 | -6.4 | -1.6 | -2.7 | TFPI2  | Homo sapiens tissue factor pathway inhibitor 2 (TFPI2), mRNA [NM_006528]                         | 7980  |
| A_23_P27573  | -1.0 | -1.1 | -2.1 | -3.2 | TFPT   | Homo sapiens TCF3 (E2A) fusion partner (in childhood Leukemia) (TFPT), mRNA [NM_013342]          | 29844 |

|              |     |      |      |     |          |                                                                                                                 |      |
|--------------|-----|------|------|-----|----------|-----------------------------------------------------------------------------------------------------------------|------|
| A_23_P122896 | 6.3 | 6.2  | 7.0  | 2.7 | TFR2     | Homo sapiens transferrin receptor 2 (TFR2), transcript variant 1, mRNA [NM_003227]                              | 7036 |
| A_24_P373096 | 1.0 | -8.9 | -1.0 | 1.1 | TGFB3    | Homo sapiens transforming growth factor, beta 3 (TGFB3), mRNA [NM_003239]                                       | 7043 |
| A_24_P170869 | 1.2 | -1.9 | -1.4 | 3.4 | TGFBRAP1 | transforming growth factor, beta receptor associated protein 1 [Source:HGNC Symbol;Acc:16836] [ENST00000393359] | 9392 |

|              |       |     |     |     |       |                                                                                                                                        |      |
|--------------|-------|-----|-----|-----|-------|----------------------------------------------------------------------------------------------------------------------------------------|------|
| A_23_P153197 | -2.7  | 1.9 | 2.2 | 2.3 | TGIF1 | Homo sapiens TGFB-induced factor homeobox 1 (TGIF1), transcript variant 1, mRNA [NM_170695]                                            | 7050 |
| A_23_P65618  | -12.6 | 1.0 | 1.5 | 1.0 | TGM1  | Homo sapiens transglutaminase 1 (K polypeptide epidermal type I, protein-glutamine-gamma-glutamyltransferase) (TGM1), mRNA [NM_000359] | 7051 |

|              |      |     |      |      |      |                                                                                                                                             |      |
|--------------|------|-----|------|------|------|---------------------------------------------------------------------------------------------------------------------------------------------|------|
| A_24_P923251 | 2.8  | 2.9 | 3.7  | 1.5  | TGM2 | Homo sapiens transglutaminase 2 (C polypeptide, protein-glutamine-gamma-glutamyltransferase) (TGM2), transcript variant 2, mRNA [NM_198951] | 7052 |
| A_23_P57118  | 1.5  | 2.2 | 1.4  | 1.4  | TGM3 | Homo sapiens transglutaminase 3 (E polypeptide, protein-glutamine-gamma-glutamyltransferase) (TGM3), mRNA [NM_003245]                       | 7053 |
| A_24_P402238 | -1.4 | 2.9 | -2.2 | -1.6 | TGM4 | Homo sapiens transglutaminase 4 (prostate) (TGM4), mRNA [NM_003241]                                                                         | 7047 |

|              |      |      |      |      |        |                                                                                   |       |
|--------------|------|------|------|------|--------|-----------------------------------------------------------------------------------|-------|
| A_23_P60899  | 1.1  | 1.8  | 2.1  | 1.4  | TGS1   | Homo sapiens trimethylguanosine synthase 1 (TGS1), mRNA [NM_024831]               | 96764 |
| A_24_P924602 | 3.2  | 2.5  | 2.4  | 3.1  | TH     | Homo sapiens tyrosine hydroxylase (TH), transcript variant 1, mRNA [NM_199292]    | 7054  |
| A_24_P222126 | -1.7 | -2.2 | -1.7 | -1.1 | TH1L   | Homo sapiens TH1-like (Drosophila) (TH1L), transcript variant 1, mRNA [NM_198976] | 51497 |
| A_23_P106391 | 2.7  | 2.6  | 1.0  | 2.3  | THAP10 | Homo sapiens THAP domain containing 10 (THAP10), mRNA [NM_020147]                 | 56906 |

|              |      |      |      |      |        |                                                                                       |        |
|--------------|------|------|------|------|--------|---------------------------------------------------------------------------------------|--------|
| A_24_P365954 | -1.8 | -3.7 | 1.1  | -1.9 | THAP11 | Homo sapiens THAP domain containing 11 (THAP11), mRNA [NM_020457]                     | 57215  |
| A_24_P15586  | 2.7  | 2.7  | 2.6  | 2.7  | THAP5  | Homo sapiens THAP domain containing 5 (THAP5), transcript variant 2, mRNA [NM_182529] | 168451 |
| A_24_P23527  | 1.4  | -1.3 | -2.6 | -1.6 | THAP5  | Homo sapiens THAP domain containing 5 (THAP5), transcript variant 2, mRNA [NM_182529] | 168451 |
| A_23_P109410 | -9.6 | 1.3  | 1.6  | 1.5  | THAP7  | Homo sapiens THAP domain containing 7 (THAP7), transcript variant 1, mRNA [NM_030573] | 80764  |

|              |       |      |      |      |       |                                                                                  |        |
|--------------|-------|------|------|------|-------|----------------------------------------------------------------------------------|--------|
| A_24_P142118 | 4.0   | 6.2  | 4.9  | 2.2  | THBS1 | Homo sapiens thrombospondin 1 (THBS1), mRNA [NM_003246]                          | 7057   |
| A_23_P131074 | -2.0  | -1.7 | -1.6 | -2.5 | THEG  | Homo sapiens Theg homolog (mouse) (THEG), transcript variant 1, mRNA [NM_016585] | 51298  |
| A_32_P66674  | 1.6   | 2.4  | -1.8 | 1.4  | THEM4 | Homo sapiens thioesterase superfamily member 4 (THEM4), mRNA [NM_053055]         | 117145 |
| A_23_P149375 | -17.6 | -2.2 | -2.5 | -1.1 | THEM4 | Homo sapiens thioesterase superfamily member 4 (THEM4), mRNA [NM_053055]         | 117145 |

|              |      |      |      |      |       |                                                                                                  |        |
|--------------|------|------|------|------|-------|--------------------------------------------------------------------------------------------------|--------|
| A_24_P331711 | 4.4  | -1.6 | 4.2  | 3.5  | THEM5 | thioesterase superfamily member 5 [Source:HGNC Symbol;Acc:26755] [ENST00000368817]               | 284486 |
| A_23_P121956 | 1.9  | 2.6  | 1.7  | -1.1 | THG1L | Homo sapiens tRNA-histidine guanylyltransferase 1-like (S. cerevisiae) (THG1L), mRNA [NM_017872] | 54974  |
| A_23_P78372  | -1.9 | -3.0 | -1.7 | -1.1 | THOC1 | Homo sapiens THO complex 1 (THOC1), mRNA [NM_005131]                                             | 9984   |
| A_24_P177353 | -1.6 | -1.6 | -1.8 | -2.2 | THOC2 | Homo sapiens THO complex 2 (THOC2), mRNA [NM_001081550]                                          | 57187  |
| A_32_P41405  | 1.4  | -1.2 | 2.1  | -2.5 | THOC3 | Homo sapiens THO complex 3 (THOC3), mRNA [NM_032361]                                             | 84321  |



|              |      |     |      |      |        |                                                                                             |       |
|--------------|------|-----|------|------|--------|---------------------------------------------------------------------------------------------|-------|
| A_24_P387158 | -2.2 | 2.1 | -1.1 | -1.6 | THOC4  | Homo sapiens THO complex 4 (THOC4), mRNA [NM_005782]                                        | 10189 |
| A_23_P109470 | -7.2 | 1.8 | -1.8 | 2.1  | THOC5  | Homo sapiens THO complex 5 (THOC5), transcript variant 1, mRNA [NM_001002878]               | 8563  |
| A_24_P262407 | 3.2  | 5.1 | 1.4  | 8.1  | THRA   | Homo sapiens thyroid hormone receptor, alpha (THRA), transcript variant 1, mRNA [NM_199334] | 7067  |
| A_23_P160367 | 1.1  | 1.0 | -2.4 | 1.0  | THRAP3 | Homo sapiens thyroid hormone receptor associated protein 3 (THRAP3), mRNA [NM_005119]       | 9967  |

|              |      |      |      |      |        |                                                                                      |        |
|--------------|------|------|------|------|--------|--------------------------------------------------------------------------------------|--------|
| A_23_P148249 | -1.2 | -2.2 | -1.2 | -1.2 | THSD4  | Homo sapiens thrombospondin, type I, domain containing 4 (THSD4), mRNA [NM_024817]   | 79875  |
| A_24_P5153   | 2.6  | -6.7 | 1.8  | -3.6 | THSD4  | Homo sapiens thrombospondin, type I, domain containing 4 (THSD4), mRNA [NM_024817]   | 79875  |
| A_32_P350897 | 3.4  | 1.8  | 3.2  | 3.5  | THSD7A | Homo sapiens thrombospondin, type I, domain containing 7A (THSD7A), mRNA [NM_015204] | 221981 |
| A_32_P11670  | 1.0  | -1.0 | -9.9 | -1.0 | THSD7A | Homo sapiens thrombospondin, type I, domain containing 7A (THSD7A), mRNA [NM_015204] | 221981 |

|              |      |      |      |      |         |                                                                                                                   |        |
|--------------|------|------|------|------|---------|-------------------------------------------------------------------------------------------------------------------|--------|
| A_24_P99371  | -2.1 | -1.6 | -1.2 | -1.2 | THUMPD1 | Homo sapiens THUMP domain containing 1 (THUMPD1), mRNA [NM_017736]                                                | 55623  |
| A_24_P90878  | -4.0 | -1.1 | -1.1 | -1.1 | THUMPD1 | Homo sapiens THUMP domain containing 1 (THUMPD1), mRNA [NM_017736]                                                | 55623  |
| A_24_P417474 | 2.0  | 1.5  | -1.8 | 1.3  | TIA1    | Homo sapiens TIA1 cytotoxic granule-associated RNA binding protein (TIA1), transcript variant 1, mRNA [NM_022037] | 7072   |
| A_23_P90311  | -2.3 | -1.1 | -1.1 | -1.3 | TICAM1  | Homo sapiens toll-like receptor adaptor molecule 1 (TICAM1), mRNA [NM_182919]                                     | 148022 |

|              |      |       |      |      |       |                                                                                                    |        |
|--------------|------|-------|------|------|-------|----------------------------------------------------------------------------------------------------|--------|
| A_23_P120170 | -1.5 | -1.9  | -2.2 | -1.5 | TIGD1 | Homo sapiens tigger transposable element derived 1 (TIGD1), mRNA [NM_145702]                       | 200765 |
| A_32_P200787 | 2.0  | -1.3  | 1.5  | -1.8 | TIGD1 | Homo sapiens tigger transposable element derived 1 (TIGD1), mRNA [NM_145702]                       | 200765 |
| A_23_P20437  | -1.6 | -14.3 | -1.6 | -1.6 | TIGD5 | Homo sapiens tigger transposable element derived 5 (TIGD5), mRNA [NM_032862]                       | 84948  |
| A_23_P213966 | -1.1 | -2.5  | -1.4 | -1.1 | TIGD6 | Homo sapiens tigger transposable element derived 6 (TIGD6), transcript variant 1, mRNA [NM_030953] | 81789  |

|              |      |     |      |      |         |                                                                                                                                                        |       |
|--------------|------|-----|------|------|---------|--------------------------------------------------------------------------------------------------------------------------------------------------------|-------|
| A_23_P64343  | 2.9  | 1.1 | 2.0  | -1.0 | TIMM10  | Homo sapiens translocase of inner mitochondrial membrane 10 homolog (yeast) (TIMM10), nuclear gene encoding mitochondrial protein, mRNA [NM_012456]    | 26519 |
| A_23_P126970 | -3.0 | 1.4 | -5.4 | -3.8 | TIMM17A | Homo sapiens translocase of inner mitochondrial membrane 17 homolog A (yeast) (TIMM17A), nuclear gene encoding mitochondrial protein, mRNA [NM_006335] | 10440 |

|              |     |     |      |     |         |                                                                                                                                                                              |           |
|--------------|-----|-----|------|-----|---------|------------------------------------------------------------------------------------------------------------------------------------------------------------------------------|-----------|
| A_23_P33886  | 1.5 | 2.1 | -1.6 | 1.0 | TIMM17B | Homo sapiens translocase of inner mitochondrial membrane 17 homolog B (yeast) (TIMM17B), nuclear gene encoding mitochondrial protein, transcript variant 2, mRNA [NM_005834] | 10245     |
| A_23_P373649 | 1.9 | 2.2 | -1.7 | 3.2 | TIMM23  | Homo sapiens translocase of inner mitochondrial membrane 23 homolog (yeast) (TIMM23), nuclear gene encoding mitochondrial protein, mRNA [NM_006327]                          | 100287932 |

|              |      |      |      |      |        |                                                                                                                                                                            |       |
|--------------|------|------|------|------|--------|----------------------------------------------------------------------------------------------------------------------------------------------------------------------------|-------|
| A_23_P119214 | -1.1 | -1.7 | -2.3 | -1.3 | TIMM44 | Homo sapiens translocase of inner mitochondrial membrane 44 homolog (yeast) (TIMM44), nuclear gene encoding mitochondrial protein, mRNA [NM_006351]                        | 10469 |
| A_23_P217637 | -1.4 | -1.4 | -2.2 | -3.3 | TIMM8A | Homo sapiens translocase of inner mitochondrial membrane 8 homolog A (yeast) (TIMM8A), nuclear gene encoding mitochondrial protein, transcript variant 1, mRNA [NM_004085] | 1678  |

|              |       |      |      |       |         |                                                                                                            |       |
|--------------|-------|------|------|-------|---------|------------------------------------------------------------------------------------------------------------|-------|
| A_23_P62115  | -10.3 | 1.4  | -1.1 | -12.3 | TIMP1   | Homo sapiens TIMP metalloproteinase inhibitor 1 (TIMP1), mRNA [NM_003254]                                  | 7076  |
| A_23_P107401 | -1.0  | -7.9 | 1.0  | -2.5  | TIMP2   | Homo sapiens TIMP metalloproteinase inhibitor 2 (TIMP2), mRNA [NM_003255]                                  | 7077  |
| A_23_P168329 | 1.6   | -1.9 | 2.1  | 1.2   | TINAG   | Homo sapiens tubulointerstitial nephritis antigen (TINAG), mRNA [NM_014464]                                | 27283 |
| A_23_P85585  | -1.4  | 1.7  | 3.3  | -3.3  | TINAGL1 | Homo sapiens tubulointerstitial nephritis antigen-like 1 (TINAGL1), transcript variant 1, mRNA [NM_022164] | 64129 |



|              |      |     |       |      |        |                                                                                                                                     |        |
|--------------|------|-----|-------|------|--------|-------------------------------------------------------------------------------------------------------------------------------------|--------|
| A_23_P143845 | -1.3 | 2.8 | -1.3  | 2.9  | TIPARP | Homo sapiens TCDD-inducible poly(ADP-ribose) polymerase (TIPARP), transcript variant 2, mRNA [NM_015508]                            | 25976  |
| A_23_P397856 | 1.0  | 1.4 | -11.6 | -1.0 | TIRAP  | Homo sapiens toll-interleukin 1 receptor (TIR) domain containing adaptor protein (TIRAP), transcript variant 3, mRNA [NM_001039661] | 114609 |
| A_23_P205828 | 1.3  | 1.1 | -2.3  | 1.3  | TJP1   | Homo sapiens tight junction protein 1 (zona occludens 1) (TJP1), transcript variant 1, mRNA [NM_003257]                             | 7082   |

|              |      |     |      |     |       |                                                                                                         |        |
|--------------|------|-----|------|-----|-------|---------------------------------------------------------------------------------------------------------|--------|
| A_23_P9293   | 3.4  | 5.0 | 5.9  | 1.4 | TJP2  | Homo sapiens tight junction protein 2 (zona occludens 2) (TJP2), transcript variant 1, mRNA [NM_004817] | 9414   |
| A_23_P108157 | 2.4  | 1.4 | 1.8  | 3.5 | TJP3  | Homo sapiens tight junction protein 3 (zona occludens 3) (TJP3), mRNA [NM_014428]                       | 27134  |
| A_23_P259901 | -1.3 | 2.4 | 3.5  | 1.2 | TKTL1 | Homo sapiens transketolase-like 1 (TKTL1), transcript variant 1, mRNA [NM_012253]                       | 8277   |
| A_23_P420417 | 1.4  | 2.0 | -1.1 | 1.1 | TLCD1 | Homo sapiens TLC domain containing 1 (TLCD1), transcript variant 1, mRNA [NM_138463]                    | 116238 |

|              |      |      |      |      |      |                                                                                                                              |      |
|--------------|------|------|------|------|------|------------------------------------------------------------------------------------------------------------------------------|------|
| A_23_P135239 | -1.1 | 1.6  | -3.8 | -1.1 | TLE1 | Homo sapiens transducin-like enhancer of split 1 (E(sp1) homolog, Drosophila) (TLE1), mRNA [NM_005077]                       | 7088 |
| A_23_P342934 | 1.4  | 3.4  | -5.4 | -2.3 | TLE3 | Homo sapiens transducin-like enhancer of split 3 (E(sp1) homolog, Drosophila) (TLE3), transcript variant 1, mRNA [NM_005078] | 7090 |
| A_23_P94494  | -1.1 | -3.2 | -1.3 | -1.2 | TLE4 | Homo sapiens transducin-like enhancer of split 4 (E(sp1) homolog, Drosophila) (TLE4), mRNA [NM_007005]                       | 7091 |

|              |      |      |      |      |      |                                                                                                                              |       |
|--------------|------|------|------|------|------|------------------------------------------------------------------------------------------------------------------------------|-------|
| A_23_P208937 | -1.0 | -2.6 | -5.0 | -1.2 | TLE6 | Homo sapiens transducin-like enhancer of split 6 (E(sp1) homolog, Drosophila) (TLE6), transcript variant 2, mRNA [NM_024760] | 79816 |
| A_23_P426501 | -1.5 | -1.4 | -2.1 | 1.2  | TLE6 | transducin-like enhancer of split 6 (E(sp1) homolog, Drosophila) [Source:HGNC Symbol;Acc:30788] [ENST00000482627]            | 79816 |
| A_24_P282762 | -1.6 | -3.3 | -3.9 | -1.0 | TLK1 | Homo sapiens tousled-like kinase 1 (TLK1), transcript variant 1, mRNA [NM_012290]                                            | 9874  |

|              |      |      |      |      |      |                                                                                               |       |
|--------------|------|------|------|------|------|-----------------------------------------------------------------------------------------------|-------|
| A_23_P38365  | 1.8  | -1.3 | -3.3 | 1.2  | TLK2 | Homo sapiens<br>tousled-like kinase 2 (TLK2),<br>transcript variant A,<br>mRNA<br>[NM_006852] | 11011 |
| A_24_P145163 | -4.5 | 1.2  | 1.1  | -1.1 | TLL1 | Homo sapiens<br>tolloid-like 1 (TLL1),<br>transcript variant 2,<br>mRNA<br>[NM_001204760]     | 7092  |
| A_23_P427645 | -1.1 | -1.7 | -2.0 | -3.5 | TLL1 | Homo sapiens<br>tolloid-like 1 (TLL1),<br>transcript variant 1,<br>mRNA<br>[NM_012464]        | 7092  |
| A_24_P196851 | 2.7  | 8.1  | 3.3  | 3.1  | TLN1 | Homo sapiens<br>talin 1 (TLN1),<br>mRNA<br>[NM_006289]                                        | 7094  |
| A_23_P10873  | -4.4 | -1.2 | -1.4 | -1.5 | TLR1 | Homo sapiens<br>toll-like receptor 1 (TLR1),<br>mRNA<br>[NM_003263]                           | 7096  |

|              |      |      |      |      |      |                                                            |       |
|--------------|------|------|------|------|------|------------------------------------------------------------|-------|
| A_23_P29922  | 1.1  | 1.2  | 2.3  | 1.3  | TLR3 | Homo sapiens toll-like receptor 3 (TLR3), mRNA [NM_003265] | 7098  |
| A_24_P17677  | -3.3 | -1.1 | -3.5 | -1.1 | TLR6 | Homo sapiens toll-like receptor 6 (TLR6), mRNA [NM_006068] | 10333 |
| A_23_P62437  | -2.3 | 1.4  | 1.3  | -1.0 | TLR7 | Homo sapiens toll-like receptor 7 (TLR7), mRNA [NM_016562] | 51284 |
| A_23_P85240  | 1.0  | 1.0  | -2.6 | 1.0  | TLR7 | Homo sapiens toll-like receptor 7 (TLR7), mRNA [NM_016562] | 51284 |
| A_23_P73837  | 1.0  | -1.0 | -3.5 | -1.1 | TLR8 | Homo sapiens toll-like receptor 8 (TLR8), mRNA [NM_138636] | 51311 |
| A_23_P132654 | -2.0 | -2.3 | -2.3 | -2.0 | TLR9 | Homo sapiens toll-like receptor 9 (TLR9), mRNA [NM_017442] | 54106 |

|              |      |      |      |      |        |                                                                                                    |       |
|--------------|------|------|------|------|--------|----------------------------------------------------------------------------------------------------|-------|
| A_24_P328446 | 1.3  | 1.2  | -4.7 | -1.1 | TLX2   | Homo sapiens T-cell leukemia homeobox 2 (TLX2), mRNA [NM_016170]                                   | 3196  |
| A_23_P77117  | 1.8  | 2.2  | -1.4 | 1.8  | TM6SF1 | Homo sapiens transmembrane 6 superfamily member 1 (TM6SF1), transcript variant 1, mRNA [NM_023003] | 53346 |
| A_23_P142403 | -1.5 | -2.0 | 4.4  | -2.2 | TM6SF2 | Homo sapiens transmembrane 6 superfamily member 2 (TM6SF2), mRNA [NM_001001524]                    | 53345 |
| A_23_P127426 | 1.7  | 2.0  | -2.8 | 1.8  | TM7SF2 | Homo sapiens transmembrane 7 superfamily member 2 (TM7SF2), mRNA [NM_003273]                       | 7108  |

|              |      |      |      |     |        |                                                                                        |       |
|--------------|------|------|------|-----|--------|----------------------------------------------------------------------------------------|-------|
| A_32_P52816  | 3.3  | 3.2  | 3.0  | 3.2 | TM7SF3 | Homo sapiens transmembrane 7 superfamily member 3 (TM7SF3), mRNA [NM_016551]           | 51768 |
| A_23_P43107  | 1.2  | -5.8 | 1.9  | 1.1 | TM7SF4 | Homo sapiens transmembrane 7 superfamily member 4 (TM7SF4), mRNA [NM_030788]           | 81501 |
| A_24_P148521 | 4.0  | 1.7  | -2.0 | 2.2 | TMBIM1 | Homo sapiens transmembrane BAX inhibitor motif containing 1 (TMBIM1), mRNA [NM_022152] | 64114 |
| A_23_P13701  | -1.6 | -2.0 | -2.0 | 1.1 | TMBIM4 | Homo sapiens transmembrane BAX inhibitor motif containing 4 (TMBIM4), mRNA [NM_016056] | 51643 |



|              |      |      |      |      |        |                                                                                                              |        |
|--------------|------|------|------|------|--------|--------------------------------------------------------------------------------------------------------------|--------|
| A_23_P204702 | 2.0  | 2.5  | 2.1  | 1.0  | TMBIM6 | Homo sapiens transmembrane BAX inhibitor motif containing 6 (TMBIM6), transcript variant 1, mRNA [NM_003217] | 7009   |
| A_23_P305527 | -1.0 | -4.4 | -3.8 | -2.2 | TMC2   | Homo sapiens transmembrane channel-like 2 (TMC2), mRNA [NM_080751]                                           | 117532 |
| A_23_P258783 | 2.2  | 2.2  | 2.1  | 2.2  | TMC3   | Homo sapiens TMC3 protein (TMC3) mRNA, complete cds. [AY263163]                                              | 342125 |
| A_23_P330461 | -1.2 | 2.0  | 2.1  | 1.4  | TMC4   | Homo sapiens transmembrane channel-like 4 (TMC4), transcript variant 2, mRNA [NM_144686]                     | 147798 |

|              |      |      |      |      |      |                                                                                          |        |
|--------------|------|------|------|------|------|------------------------------------------------------------------------------------------|--------|
| A_23_P15101  | -2.2 | 1.0  | -1.0 | 1.0  | TMC5 | Homo sapiens transmembrane channel-like 5 (TMC5), transcript variant 3, mRNA [NM_024780] | 79838  |
| A_23_P101013 | 5.4  | 1.8  | 1.0  | -1.1 | TMC6 | Homo sapiens transmembrane channel-like 6 (TMC6), transcript variant 2, mRNA [NM_007267] | 11322  |
| A_23_P411246 | 1.1  | -2.2 | 1.2  | -1.9 | TMC8 | Homo sapiens transmembrane channel-like 8 (TMC8), mRNA [NM_152468]                       | 147138 |
| A_24_P400573 | -1.3 | -1.4 | -1.1 | -3.1 | TMC8 | Homo sapiens transmembrane channel-like 8 (TMC8), mRNA [NM_152468]                       | 147138 |

|              |      |      |      |      |       |                                                                                                               |       |
|--------------|------|------|------|------|-------|---------------------------------------------------------------------------------------------------------------|-------|
| A_32_P41070  | -2.8 | -1.7 | -1.2 | -2.0 | TMCC1 | Homo sapiens transmembrane and coiled-coil domain family 1 (TMCC1), transcript variant 1, mRNA [NM_001017395] | 23023 |
| A_23_P170986 | -1.0 | -3.3 | -4.1 | -1.3 | TMCC1 | Homo sapiens transmembrane and coiled-coil domain family 1 (TMCC1), transcript variant 1, mRNA [NM_001017395] | 23023 |
| A_24_P922288 | -3.7 | -3.5 | -1.0 | -1.1 | TMCC1 | Homo sapiens transmembrane and coiled-coil domain family 1 (TMCC1), transcript variant 1, mRNA [NM_001017395] | 23023 |

|              |      |      |      |      |        |                                                                                      |        |
|--------------|------|------|------|------|--------|--------------------------------------------------------------------------------------|--------|
| A_24_P305933 | -1.5 | -1.3 | -1.1 | -3.3 | TMCC3  | Homo sapiens transmembrane and coiled-coil domain family 3 (TMCC3), mRNA [NM_020698] | 57458  |
| A_23_P355067 | -1.4 | -1.2 | -2.1 | 1.2  | TMCO1  | Homo sapiens transmembrane and coiled-coil domains 1 (TMCO1), mRNA [NM_019026]       | 54499  |
| A_32_P143124 | 3.6  | 2.9  | -5.3 | 4.3  | TMCO1  | Homo sapiens transmembrane and coiled-coil domains 1 (TMCO1), mRNA [NM_019026]       | 54499  |
| A_23_P65857  | 1.5  | 1.5  | -4.7 | 1.0  | TMCO5A | Homo sapiens transmembrane and coiled-coil domains 5A (TMCO5A), mRNA [NM_152453]     | 145942 |

|              |      |      |      |      |          |                                                                                                                          |        |
|--------------|------|------|------|------|----------|--------------------------------------------------------------------------------------------------------------------------|--------|
| A_24_P917833 | -1.3 | -1.3 | -1.3 | -3.3 | TMED10   | Homo sapiens transmembrane emp24-like trafficking protein 10 (yeast) (TMED10), mRNA [NM_006827]                          | 10972  |
| A_24_P800629 | -2.4 | -1.6 | -1.4 | -2.1 | TMED10P1 | Homo sapiens transmembrane emp24-like trafficking protein 10 (yeast) pseudogene 1 (TMED10P1), non-coding RNA [NR_002807] | 286102 |
| A_23_P26173  | 2.0  | 2.7  | 1.8  | 1.7  | TMED3    | Homo sapiens transmembrane emp24 protein transport domain containing 3 (TMED3), mRNA [NM_007364]                         | 23423  |

|              |      |      |      |      |       |                                                                                                                     |        |
|--------------|------|------|------|------|-------|---------------------------------------------------------------------------------------------------------------------|--------|
| A_24_P163537 | -1.6 | 6.0  | -1.0 | 1.3  | TMED4 | Homo sapiens transmembrane emp24 protein transport domain containing 4 (TMED4), mRNA [NM_182547]                    | 222068 |
| A_32_P135063 | 1.0  | 1.0  | 1.0  | -2.5 | TMED4 | Homo sapiens transmembrane emp24 protein transport domain containing 4, mRNA (cDNA clone IMAGE:3456382). [BC001576] | 222068 |
| A_24_P297827 | -1.0 | -1.1 | -2.5 | -1.3 | TMED4 | transmembrane emp24 protein transport domain containing 4 [Source:HGNC Symbol;Acc:22301] [ENST00000477639]          | 222068 |

|              |       |     |      |      |       |                                                                                                                           |        |
|--------------|-------|-----|------|------|-------|---------------------------------------------------------------------------------------------------------------------------|--------|
| A_32_P128661 | -10.9 | 1.0 | 1.4  | 1.0  | TMED5 | Homo sapiens transmembrane emp24 protein transport domain containing 5 (TMED5), transcript variant 2, mRNA [NM_001167830] | 50999  |
| A_23_P26570  | -1.3  | 1.5 | 2.2  | 1.5  | TMED6 | Homo sapiens transmembrane emp24 protein transport domain containing 6 (TMED6), mRNA [NM_144676]                          | 146456 |
| A_23_P70127  | -1.3  | 1.1 | -1.0 | -4.8 | TMED9 | Homo sapiens transmembrane emp24 protein transport domain containing 9 (TMED9), mRNA [NM_017510]                          | 54732  |

|              |      |      |      |      |         |                                                                                                                |        |
|--------------|------|------|------|------|---------|----------------------------------------------------------------------------------------------------------------|--------|
| A_24_P239364 | 2.0  | 2.1  | -1.4 | 2.5  | TMEFF2  | Homo sapiens mRNA for tomoregulin, complete cds. [AB004064]                                                    | 23671  |
| A_23_P125383 | 2.4  | 6.6  | 6.6  | 6.6  | TMEFF2  | Homo sapiens transmembrane protein with EGF-like and two follistatin-like domains 2 (TMEFF2), mRNA [NM_016192] | 23671  |
| A_23_P15516  | -2.8 | 1.2  | 1.1  | -1.0 | TMEM101 | Homo sapiens transmembrane protein 101 (TMEM101), mRNA [NM_032376]                                             | 84336  |
| A_32_P112380 | -1.7 | -1.8 | -1.9 | -3.0 | TMEM102 | Homo sapiens transmembrane protein 102 (TMEM102), mRNA [NM_178518]                                             | 284114 |



|              |      |      |      |      |          |                                                                                            |        |
|--------------|------|------|------|------|----------|--------------------------------------------------------------------------------------------|--------|
| A_24_P284324 | -1.4 | -8.2 | -1.6 | -1.0 | TMEM104  | Homo sapiens transmembrane protein 104 (TMEM104), mRNA [NM_017728]                         | 54868  |
| A_32_P919718 | 1.1  | 1.0  | -2.7 | 1.0  | TMEM105  | Homo sapiens transmembrane protein 105 (TMEM105), mRNA [NM_178520]                         | 284186 |
| A_32_P353072 | 1.5  | 1.5  | -3.5 | 1.0  | TMEM106B | Homo sapiens transmembrane protein 106B (TMEM106B), transcript variant 1, mRNA [NM_018374] | 54664  |
| A_24_P284353 | 7.5  | 6.4  | 6.3  | 6.8  | TMEM107  | Homo sapiens transmembrane protein 107 (TMEM107), transcript variant 1, mRNA [NM_032354]   | 84314  |

|              |      |      |      |      |         |                                                                                        |        |
|--------------|------|------|------|------|---------|----------------------------------------------------------------------------------------|--------|
| A_24_P51016  | 1.3  | 2.6  | 2.2  | 2.2  | TMEM108 | transmembrane protein 108 [Source:HGNC Symbol;Acc:28451] [ENST00000515826]             | 66000  |
| A_23_P107036 | -2.7 | -1.5 | -1.5 | -1.6 | TMEM11  | Homo sapiens transmembrane protein 11 (TMEM11), transcript variant 1, mRNA [NM_003876] | 8834   |
| A_24_P255082 | -1.2 | -2.4 | -1.7 | 1.6  | TMEM110 | Homo sapiens transmembrane protein 110 (TMEM110), mRNA [NM_198563]                     | 375346 |
| A_24_P728604 | 1.2  | 2.4  | 1.3  | 1.3  | TMEM114 | Homo sapiens transmembrane protein 114 (TMEM114), mRNA [NM_001146336]                  | 283953 |

|              |       |      |      |      |         |                                                                                          |       |
|--------------|-------|------|------|------|---------|------------------------------------------------------------------------------------------|-------|
| A_23_P6869   | 3.3   | 3.6  | 1.4  | 2.8  | TMEM115 | Homo sapiens transmembrane protein 115 (TMEM115), mRNA [NM_007024]                       | 11070 |
| A_23_P2573   | -19.0 | -1.2 | 1.5  | -2.4 | TMEM117 | Homo sapiens transmembrane protein 117 (TMEM117), mRNA [NM_032256]                       | 84216 |
| A_23_P29924  | -1.9  | -1.8 | -2.0 | -2.2 | TMEM128 | Homo sapiens transmembrane protein 128 (TMEM128), mRNA [NM_032927]                       | 85013 |
| A_23_P354175 | 1.5   | 1.5  | -2.1 | 1.0  | TMEM129 | Homo sapiens transmembrane protein 129 (TMEM129), transcript variant 2, mRNA [NM_138385] | 92305 |

|              |      |      |      |      |          |                                                                                          |        |
|--------------|------|------|------|------|----------|------------------------------------------------------------------------------------------|--------|
| A_23_P349966 | -2.3 | 1.0  | 1.3  | -1.0 | TMEM130  | Homo sapiens transmembrane protein 130 (TMEM130), transcript variant 2, mRNA [NM_152913] | 222865 |
| A_23_P368558 | 5.0  | 3.5  | 3.4  | 3.5  | TMEM131  | Homo sapiens transmembrane protein 131 (TMEM131), mRNA [NM_015348]                       | 23505  |
| A_24_P66691  | -3.1 | -5.9 | -6.0 | -5.8 | TMEM132B | transmembrane protein 132B [Source:HGNC Symbol;Acc:29397] [ENST0000534945]               | 114795 |
| A_24_P6626   | 1.2  | -7.0 | -1.0 | -1.0 | TMEM132B | Homo sapiens transmembrane protein 132B (TMEM132B), mRNA [NM_052907]                     | 114795 |

|              |      |      |      |      |         |                                                                    |        |
|--------------|------|------|------|------|---------|--------------------------------------------------------------------|--------|
| A_24_P372134 | 1.2  | 1.4  | 1.4  | -2.4 | TMEM140 | Homo sapiens transmembrane protein 140 (TMEM140), mRNA [NM_018295] | 55281  |
| A_23_P94591  | 2.4  | 3.0  | 1.3  | 1.5  | TMEM141 | Homo sapiens transmembrane protein 141 (TMEM141), mRNA [NM_032928] | 85014  |
| A_24_P412976 | -6.7 | -1.4 | -1.1 | -2.7 | TMEM143 | Homo sapiens transmembrane protein 143 (TMEM143), mRNA [NM_018273] | 55260  |
| A_23_P67127  | 1.0  | -1.1 | 1.4  | -2.1 | TMEM145 | Homo sapiens transmembrane protein 145 (TMEM145), mRNA [NM_173633] | 284339 |

|              |      |      |      |      |          |                                                                                               |        |
|--------------|------|------|------|------|----------|-----------------------------------------------------------------------------------------------|--------|
| A_24_P11640  | -1.6 | 1.0  | -5.6 | -1.5 | TMEM150A | Homo sapiens transmembrane protein 150A (TMEM150A), transcript variant 1, mRNA [NM_001031738] | 129303 |
| A_23_P361584 | 1.7  | 2.4  | 1.5  | -1.0 | TMEM154  | Homo sapiens transmembrane protein 154 (TMEM154), mRNA [NM_152680]                            | 201799 |
| A_23_P107994 | -1.8 | -2.3 | -2.1 | 1.2  | TMEM160  | Homo sapiens transmembrane protein 160 (TMEM160), mRNA [NM_017854]                            | 54958  |
| A_23_P165171 | 1.4  | -3.3 | -1.4 | -1.5 | TMEM161A | Homo sapiens transmembrane protein 161A (TMEM161A), mRNA [NM_017814]                          | 54929  |

|              |      |      |      |      |          |                                                                                          |        |
|--------------|------|------|------|------|----------|------------------------------------------------------------------------------------------|--------|
| A_24_P354651 | 3.1  | 8.4  | 1.2  | 3.9  | TMEM161B | Homo sapiens transmembrane protein 161B (TMEM161B), mRNA [NM_153354]                     | 153396 |
| A_23_P133174 | -1.1 | -1.1 | -1.3 | -4.7 | TMEM165  | Homo sapiens transmembrane protein 165 (TMEM165), mRNA [NM_018475]                       | 55858  |
| A_32_P81768  | 1.1  | -8.0 | 1.1  | 1.1  | TMEM167A | Homo sapiens transmembrane protein 167A (TMEM167A), mRNA [NM_174909]                     | 153339 |
| A_23_P68338  | -4.2 | 1.0  | -1.0 | -1.3 | TMEM169  | Homo sapiens transmembrane protein 169 (TMEM169), transcript variant 3, mRNA [NM_138390] | 92691  |

|              |      |      |       |      |          |                                                                                          |        |
|--------------|------|------|-------|------|----------|------------------------------------------------------------------------------------------|--------|
| A_32_P206949 | -1.0 | -1.1 | -18.6 | -1.1 | TMEM17   | Homo sapiens transmembrane protein 17 (TMEM17), mRNA [NM_198276]                         | 200728 |
| A_24_P504050 | 1.1  | 1.1  | 1.0   | -2.2 | TMEM170A | transmembrane protein 170A [Source:HGNC Symbol;Acc:29577] [ENST00000357613]              | 124491 |
| A_32_P110390 | -1.2 | 1.1  | 2.1   | 1.7  | TMEM171  | Homo sapiens transmembrane protein 171 (TMEM171), transcript variant 1, mRNA [NM_173490] | 134285 |



|              |     |      |     |     |          |                                                                                                                 |        |
|--------------|-----|------|-----|-----|----------|-----------------------------------------------------------------------------------------------------------------|--------|
| A_23_P61371  | 1.5 | 1.3  | 1.4 | 3.3 | TMEM173  | Homo sapiens transmembrane protein 173 (TMEM173), nuclear gene encoding mitochondrial protein, mRNA [NM_198282] | 340061 |
| A_23_P344594 | 2.2 | -1.2 | 2.0 | 3.2 | TMEM174  | Homo sapiens transmembrane protein 174 (TMEM174), mRNA [NM_153217]                                              | 134288 |
| A_23_P252082 | 1.8 | 3.5  | 2.2 | 3.6 | TMEM176A | Homo sapiens transmembrane protein 176A (TMEM176A), mRNA [NM_018487]                                            | 55365  |

|              |      |      |      |      |          |                                                                                            |        |
|--------------|------|------|------|------|----------|--------------------------------------------------------------------------------------------|--------|
| A_23_P142738 | -1.7 | -1.7 | -1.8 | -2.0 | TMEM178  | Homo sapiens transmembrane protein 178 (TMEM178), transcript variant 1, mRNA [NM_152390]   | 130733 |
| A_24_P93206  | 1.1  | 2.0  | 2.0  | 1.1  | TMEM179  | Homo sapiens transmembrane protein 179 (TMEM179), mRNA [NM_207379]                         | 388021 |
| A_24_P161959 | 1.1  | -1.0 | -2.9 | 1.1  | TMEM179B | Homo sapiens transmembrane protein 179B (TMEM179B), mRNA [NM_199337]                       | 374395 |
| A_24_P40519  | -5.4 | -2.0 | 1.6  | 2.1  | TMEM185A | Homo sapiens transmembrane protein 185A (TMEM185A), transcript variant 1, mRNA [NM_032508] | 84548  |

|              |      |      |      |      |          |                                                                                |        |
|--------------|------|------|------|------|----------|--------------------------------------------------------------------------------|--------|
| A_32_P135558 | -2.1 | -3.1 | -2.0 | -1.2 | TMEM188  | Homo sapiens transmembrane protein 188 (TMEM188), mRNA [NM_153261]             | 255919 |
| A_23_P397417 | -5.4 | 1.3  | 1.2  | 1.1  | TMEM188  | Homo sapiens transmembrane protein 188 (TMEM188), mRNA [NM_153261]             | 255919 |
| A_23_P385742 | -1.3 | -1.5 | -2.6 | 1.1  | TMEM19   | Homo sapiens transmembrane protein 19 (TMEM19), mRNA [NM_018279]               | 55266  |
| A_23_P166336 | 1.3  | 2.1  | 3.5  | 2.1  | TMEM191A | Homo sapiens transmembrane protein 191A (TMEM191A), non-coding RNA [NR_026815] | 84222  |

|              |      |      |      |      |          |                                                                                            |        |
|--------------|------|------|------|------|----------|--------------------------------------------------------------------------------------------|--------|
| A_24_P478495 | 2.4  | -1.3 | -1.2 | -1.1 | TMEM191B | Homo sapiens cDNA FLJ35852 fis, clone TESTI2007074. [AK093171]                             | 728229 |
| A_24_P787889 | 2.5  | 3.5  | 2.0  | 1.3  | TMEM191B | Homo sapiens transmembrane protein 191B (TMEM191B), mRNA [NM_001242313]                    | 728229 |
| A_23_P53346  | -1.1 | -1.0 | -3.0 | -1.0 | TMEM194A | Homo sapiens transmembrane protein 194A (TMEM194A), transcript variant 2, mRNA [NM_015257] | 23306  |
| A_24_P822704 | 1.3  | -1.3 | 1.0  | -2.4 | TMEM198  | Homo sapiens transmembrane protein 198 (TMEM198), mRNA [NM_00105209]                       | 130612 |

|              |      |      |      |      |          |                                                                                                              |        |
|--------------|------|------|------|------|----------|--------------------------------------------------------------------------------------------------------------|--------|
| A_23_P391906 | 1.0  | -1.4 | 1.3  | 2.1  | TMEM200A | Homo sapiens transmembrane protein 200A, mRNA (cDNA clone MGC:50847 IMAGE:5760073), complete cds. [BC044246] | 114801 |
| A_24_P933011 | 1.7  | 2.2  | 1.4  | -1.4 | TMEM200C | Homo sapiens transmembrane protein 200C (TMEM200C), mRNA [NM_001080209]                                      | 645369 |
| A_24_P522631 | -1.6 | -1.1 | -2.4 | -1.8 | TMEM201  | Homo sapiens transmembrane protein 201 (TMEM201), transcript variant 1, mRNA [NM_001130924]                  | 199953 |

|              |      |      |      |      |         |                                                                                          |       |
|--------------|------|------|------|------|---------|------------------------------------------------------------------------------------------|-------|
| A_23_P136238 | 3.9  | 1.5  | 3.4  | -9.0 | TMEM203 | Homo sapiens transmembrane protein 203 (TMEM203), mRNA [NM_053045]                       | 94107 |
| A_23_P206369 | -4.8 | 1.1  | 1.1  | 1.1  | TMEM208 | Homo sapiens transmembrane protein 208 (TMEM208), mRNA [NM_014187]                       | 29100 |
| A_23_P122805 | 3.1  | 1.5  | 1.2  | 1.3  | TMEM209 | Homo sapiens transmembrane protein 209 (TMEM209), mRNA [NM_032842]                       | 84928 |
| A_23_P143083 | 1.3  | -4.8 | -3.4 | 1.2  | TMEM214 | Homo sapiens transmembrane protein 214 (TMEM214), transcript variant 1, mRNA [NM_017727] | 54867 |

|              |      |      |      |      |         |                                                                                          |        |
|--------------|------|------|------|------|---------|------------------------------------------------------------------------------------------|--------|
| A_23_P203389 | 1.9  | -1.2 | 2.0  | -4.7 | TMEM216 | Homo sapiens transmembrane protein 216 (TMEM216), transcript variant 1, mRNA [NM_016499] | 51259  |
| A_32_P95757  | -1.1 | 1.0  | -2.1 | 1.0  | TMEM217 | Homo sapiens transmembrane protein 217 (TMEM217), transcript variant 1, mRNA [NM_145316] | 221468 |
| A_23_P77562  | 6.4  | 5.1  | 2.4  | 5.1  | TMEM219 | Homo sapiens transmembrane protein 219 (TMEM219), transcript variant 2, mRNA [NM_194280] | 124446 |

|              |      |     |      |      |          |                                                                                             |        |
|--------------|------|-----|------|------|----------|---------------------------------------------------------------------------------------------|--------|
| A_24_P116700 | -3.5 | 1.3 | 1.3  | 1.4  | TMEM220  | Homo sapiens transmembrane protein 220 (TMEM220), mRNA [NM_001004313]                       | 388335 |
| A_23_P1956   | 1.1  | 2.1 | -2.6 | 2.1  | TMEM223  | Homo sapiens transmembrane protein 223 (TMEM223), mRNA [NM_001080501]                       | 79064  |
| A_32_P47027  | -2.5 | 1.4 | -2.1 | -1.3 | TMEM229A | Homo sapiens transmembrane protein 229A (TMEM229A), mRNA [NM_001136002]                     | 730130 |
| A_23_P359497 | 4.1  | 2.4 | 3.8  | 1.7  | TMEM231  | Homo sapiens transmembrane protein 231 (TMEM231), transcript variant 3, mRNA [NM_001077419] | 79583  |



|              |      |      |      |      |         |                                                                                                |        |
|--------------|------|------|------|------|---------|------------------------------------------------------------------------------------------------|--------|
| A_24_P510138 | -1.2 | 1.2  | 3.5  | -1.8 | TMEM232 | transmembrane protein 232<br>[Source:HGNC Symbol;Acc:37270]<br>[ENST00000507188]               | 642987 |
| A_24_P482104 | -2.0 | 1.0  | 1.0  | 1.1  | TMEM232 | transmembrane protein 232<br>[Source:HGNC Symbol;Acc:37270]<br>[ENST00000503527]               | 642987 |
| A_24_P285378 | -1.0 | -3.4 | -1.1 | -2.8 | TMEM234 | transmembrane protein 234<br>[Source:HGNC Symbol;Acc:28837]<br>[ENST00000461402]               | 56063  |
| A_23_P370097 | -2.7 | 1.4  | -1.3 | 1.0  | TMEM237 | Homo sapiens transmembrane protein 237 (TMEM237), transcript variant 1, mRNA<br>[NM_001044385] | 65062  |

|              |      |      |      |      |         |                                                                                             |           |
|--------------|------|------|------|------|---------|---------------------------------------------------------------------------------------------|-----------|
| A_24_P941831 | -5.7 | 1.2  | 1.1  | -1.0 | TMEM237 | Homo sapiens transmembrane protein 237 (TMEM237), transcript variant 1, mRNA [NM_001044385] | 65062     |
| A_23_P131909 | 1.3  | -3.5 | -1.7 | -2.1 | TMEM239 | Homo sapiens transmembrane protein 239 (TMEM239), mRNA [NM_001167670]                       | 100288797 |
| A_32_P133182 | 2.5  | -1.0 | 1.1  | -1.0 | TMEM239 | Uncharacterized protein [Source:UniProtKB/TrEMBL;Accession:D6RAZ5] [ENST00000554164]        | 100288797 |
| A_23_P203115 | 1.1  | -5.7 | 1.0  | 1.1  | TMEM25  | Homo sapiens transmembrane protein 25 (TMEM25), transcript variant 1, mRNA [NM_032780]      | 84866     |

|              |      |      |      |      |         |                                                                                        |        |
|--------------|------|------|------|------|---------|----------------------------------------------------------------------------------------|--------|
| A_24_P133017 | -1.5 | -1.4 | -3.4 | -1.6 | TMEM25  | Homo sapiens transmembrane protein 25 (TMEM25), transcript variant 1, mRNA [NM_032780] | 84866  |
| A_23_P33984  | 1.0  | -1.0 | 3.2  | -1.1 | TMEM27  | Homo sapiens transmembrane protein 27 (TMEM27), mRNA [NM_020665]                       | 57393  |
| A_24_P616840 | 2.1  | -1.4 | -1.1 | -2.3 | TMEM30B | Homo sapiens transmembrane protein 30B (TMEM30B), mRNA [NM_001017970]                  | 161291 |
| A_32_P143377 | 3.8  | 2.1  | 2.7  | 1.5  | TMEM30B | Homo sapiens transmembrane protein 30B (TMEM30B), mRNA [NM_001017970]                  | 161291 |

|              |       |      |       |      |         |                                                                    |       |
|--------------|-------|------|-------|------|---------|--------------------------------------------------------------------|-------|
| A_24_P410639 | -30.7 | -1.3 | -33.4 | -1.5 | TMEM33  | Homo sapiens transmembrane protein 33 (TMEM33), mRNA [NM_018126]   | 55161 |
| A_24_P932066 | 1.4   | 1.4  | -3.5  | -1.2 | TMEM33  | Homo sapiens transmembrane protein 33 (TMEM33), mRNA [NM_018126]   | 55161 |
| A_23_P45324  | 1.0   | -1.0 | -2.8  | -1.1 | TMEM35  | Homo sapiens transmembrane protein 35 (TMEM35), mRNA [NM_021637]   | 59353 |
| A_24_P278156 | 1.0   | -4.3 | 1.2   | 1.1  | TMEM38B | Homo sapiens transmembrane protein 38B (TMEM38B), mRNA [NM_018112] | 55151 |
| A_24_P120303 | -1.9  | 1.2  | -2.5  | 1.2  | TMEM39A | Homo sapiens transmembrane protein 39A (TMEM39A), mRNA [NM_018266] | 55254 |

|              |      |      |      |       |         |                                                                          |        |
|--------------|------|------|------|-------|---------|--------------------------------------------------------------------------|--------|
| A_23_P29551  | 1.3  | 2.1  | -1.7 | 1.1   | TMEM40  | Homo sapiens transmembrane protein 40 (TMEM40), mRNA [NM_018306]         | 55287  |
| A_23_P80832  | -2.1 | -1.0 | -2.0 | -1.9  | TMEM41A | Homo sapiens transmembrane protein 41A (TMEM41A), mRNA [NM_080652]       | 90407  |
| A_23_P29836  | -1.0 | -1.1 | -5.3 | 1.6   | TMEM42  | Homo sapiens transmembrane protein 42 (TMEM42), mRNA [NM_144638]         | 131616 |
| A_24_P615181 | -2.8 | 1.0  | -1.0 | -1.6  | TMEM44  | transmembrane protein 44 [Source:HGNC Symbol;Acc:25120] [ENST0000476750] | 93109  |
| A_23_P1682   | -1.1 | 1.1  | -1.1 | -27.5 | TMEM45B | Homo sapiens transmembrane protein 45B (TMEM45B), mRNA [NM_138788]       | 120224 |

|              |     |      |      |      |         |                                                                                          |       |
|--------------|-----|------|------|------|---------|------------------------------------------------------------------------------------------|-------|
| A_24_P143171 | 1.0 | -1.0 | 3.1  | -1.1 | TMEM47  | Homo sapiens transmembrane protein 47 (TMEM47), mRNA [NM_031442]                         | 83604 |
| A_23_P74129  | 1.5 | 1.6  | -3.8 | -1.1 | TMEM50A | Homo sapiens transmembrane protein 50A (TMEM50A), mRNA [NM_014313]                       | 23585 |
| A_24_P113824 | 1.7 | 1.4  | 2.8  | 1.6  | TMEM50A | Homo sapiens transmembrane protein 50A (TMEM50A), mRNA [NM_014313]                       | 23585 |
| A_23_P57304  | 1.0 | -1.8 | -1.0 | 2.9  | TMEM50B | Homo sapiens transmembrane protein 50B (TMEM50B), transcript variant 1, mRNA [NM_006134] | 757   |

|              |      |      |      |      |         |                                                                                        |        |
|--------------|------|------|------|------|---------|----------------------------------------------------------------------------------------|--------|
| A_23_P12044  | 1.0  | 1.0  | -4.2 | -6.1 | TMEM51  | Homo sapiens transmembrane protein 51 (TMEM51), transcript variant 4, mRNA [NM_018022] | 55092  |
| A_23_P429624 | -1.5 | -1.8 | -1.8 | -2.4 | TMEM52  | Homo sapiens transmembrane protein 52 (TMEM52), mRNA [NM_178545]                       | 339456 |
| A_23_P85853  | 1.4  | -2.0 | -1.1 | -1.0 | TMEM53  | Homo sapiens transmembrane protein 53 (TMEM53), mRNA [NM_024587]                       | 79639  |
| A_23_P309155 | -2.7 | 1.4  | -1.0 | -2.2 | TMEM59L | Homo sapiens transmembrane protein 59-like (TMEM59L), mRNA [NM_012109]                 | 25789  |

|              |      |      |      |       |         |                                                                                           |        |
|--------------|------|------|------|-------|---------|-------------------------------------------------------------------------------------------|--------|
| A_23_P11629  | -3.7 | 1.3  | -2.2 | -1.3  | TMEM61  | Homo sapiens transmembrane protein 61 (TMEM61), mRNA [NM_182532]                          | 199964 |
| A_24_P102865 | 1.6  | -1.5 | -1.0 | -17.9 | TMEM61  | Homo sapiens transmembrane protein 61 (TMEM61), mRNA [NM_182532]                          | 199964 |
| A_23_P167856 | 1.8  | 2.2  | 1.6  | 1.4   | TMEM63B | Homo sapiens transmembrane protein 63B (TMEM63B), mRNA [NM_018426]                        | 55362  |
| A_32_P18723  | 1.1  | 1.1  | 1.7  | -2.1  | TMEM64  | Homo sapiens transmembrane protein 64 (TMEM64), transcript variant 1, mRNA [NM_001008495] | 169200 |



|              |      |      |      |      |         |                                                                           |        |
|--------------|------|------|------|------|---------|---------------------------------------------------------------------------|--------|
| A_23_P104151 | 2.2  | -1.0 | -1.0 | 1.0  | TMEM69  | Homo sapiens transmembrane protein 69 (TMEM69), mRNA [NM_016486]          | 51249  |
| A_24_P704446 | 1.0  | -3.5 | -1.1 | -1.1 | TMEM72  | Homo sapiens transmembrane protein 72 (TMEM72), mRNA [NM_001123376]       | 643236 |
| A_24_P928888 | 1.0  | -1.0 | -5.4 | -1.1 | TMEM74  | transmembrane protein 74 [Source:HGNC Symbol;Acc:26409] [ENST00000518838] | 157753 |
| A_24_P100673 | -5.3 | 1.3  | 1.2  | -2.1 | TMEM85  | Homo sapiens transmembrane protein 85 (TMEM85), mRNA [NM_016454]          | 51234  |
| A_32_P66035  | -3.6 | 1.7  | 1.3  | -1.1 | TMEM86A | Homo sapiens transmembrane protein 86A (TMEM86A), mRNA [NM_153347]        | 144110 |

|              |      |     |      |      |         |                                                                    |        |
|--------------|------|-----|------|------|---------|--------------------------------------------------------------------|--------|
| A_24_P121956 | 1.1  | 2.3 | 2.2  | -1.2 | TMEM86B | Homo sapiens transmembrane protein 86B (TMEM86B), mRNA [NM_173804] | 255043 |
| A_24_P251411 | -1.0 | 3.5 | -1.1 | -1.1 | TMEM87B | Homo sapiens transmembrane protein 87B (TMEM87B), mRNA [NM_032824] | 84910  |
| A_23_P303155 | 8.3  | 7.2 | 7.8  | 7.7  | TMEM87B | Homo sapiens transmembrane protein 87B (TMEM87B), mRNA [NM_032824] | 84910  |
| A_23_P77859  | 2.1  | 1.3 | -1.4 | -1.3 | TMEM88  | Homo sapiens transmembrane protein 88 (TMEM88), mRNA [NM_203411]   | 92162  |

|              |      |      |      |       |        |                                                                           |        |
|--------------|------|------|------|-------|--------|---------------------------------------------------------------------------|--------|
| A_23_P140907 | -1.6 | -3.8 | -1.7 | -1.9  | TMEM8A | Homo sapiens transmembrane protein 8A (TMEM8A), mRNA [NM_021259]          | 58986  |
| A_32_P190568 | 5.6  | 2.1  | 1.6  | 1.4   | TMEM8A | transmembrane protein 8A [Source:HGNC Symbol;Acc:17205] [ENST00000476735] | 58986  |
| A_23_P114952 | 2.2  | 1.0  | 1.6  | 1.1   | TMEM9  | Homo sapiens transmembrane protein 9 (TMEM9), mRNA [NM_016456]            | 252839 |
| A_24_P307289 | 2.9  | -1.2 | 1.3  | 1.0   | TMEM95 | Homo sapiens transmembrane protein 95 (TMEM95), mRNA [NM_198154]          | 339168 |
| A_24_P151920 | -2.2 | -2.9 | -4.1 | -23.6 | TMEM97 | Homo sapiens transmembrane protein 97 (TMEM97), mRNA [NM_014573]          | 27346  |

|              |      |      |      |      |        |                                                                                                                    |        |
|--------------|------|------|------|------|--------|--------------------------------------------------------------------------------------------------------------------|--------|
| A_24_P190168 | 1.0  | 1.0  | 1.0  | 2.2  | TMEM97 | Homo sapiens transmembrane protein 97 (TMEM97), mRNA [NM_014573]                                                   | 27346  |
| A_32_P201521 | -1.2 | -1.2 | -6.8 | -1.3 | TMEM97 | Homo sapiens transmembrane protein 97 (TMEM97), mRNA [NM_014573]                                                   | 27346  |
| A_23_P162087 | -1.2 | 2.2  | 1.3  | -1.3 | TMEM9B | Homo sapiens TMEM9 domain family, member B (TMEM9B), mRNA [NM_020644]                                              | 56674  |
| A_23_P56091  | 2.3  | 1.4  | 2.1  | 1.2  | TMIGD2 | Homo sapiens transmembrane and immunoglobulin domain containing 2 (TMIGD2), transcript variant 1, mRNA [NM_144615] | 126259 |

|              |      |      |      |      |           |                                                                                                     |        |
|--------------|------|------|------|------|-----------|-----------------------------------------------------------------------------------------------------|--------|
| A_23_P126605 | -2.1 | -3.4 | -1.2 | 1.1  | TMOD4     | Homo sapiens tropomodulin 4 (muscle) (TMOD4), mRNA [NM_013353]                                      | 29765  |
| A_23_P204170 | 2.9  | 2.8  | 3.2  | 2.2  | TMPO      | Homo sapiens thymopoietin (TMPO), transcript variant 1, mRNA [NM_003276]                            | 7112   |
| A_23_P325040 | 1.6  | 1.6  | 4.7  | 1.0  | TMPO      | Homo sapiens thymopoietin (TMPO), transcript variant 1, mRNA [NM_003276]                            | 7112   |
| A_24_P109101 | 1.1  | 1.2  | 1.0  | -3.6 | TMPRSS11A | Homo sapiens transmembrane protease, serine 11A (TMPRSS11A), transcript variant 1, mRNA [NM_182606] | 339967 |

|              |     |      |     |      |          |                                                                                                      |       |
|--------------|-----|------|-----|------|----------|------------------------------------------------------------------------------------------------------|-------|
| A_23_P203150 | 5.7 | 4.3  | 4.3 | 4.6  | TMPRSS13 | Homo sapiens transmembrane protease, serine 13 (TMPRSS13), transcript variant 3, mRNA [NM_001206790] | 84000 |
| A_23_P435477 | 1.7 | -2.4 | 1.3 | -1.0 | TMPRSS13 | Homo sapiens transmembrane protease, serine 13 (TMPRSS13), transcript variant 1, mRNA [NM_001077263] | 84000 |
| A_23_P29067  | 1.3 | 1.1  | 1.6 | 2.4  | TMPRSS2  | Homo sapiens transmembrane protease, serine 2 (TMPRSS2), transcript variant 2, mRNA [NM_005656]      | 7113  |

|              |      |      |      |      |         |                                                                                                                      |        |
|--------------|------|------|------|------|---------|----------------------------------------------------------------------------------------------------------------------|--------|
| A_23_P211493 | 1.1  | 2.4  | 2.2  | -4.2 | TMPRSS6 | Homo sapiens transmembrane protease, serine 6 (TMPRSS6), mRNA [NM_153609]                                            | 164656 |
| A_23_P96599  | 1.0  | -6.1 | -1.0 | 1.4  | TMSB15B | Homo sapiens thymosin beta 15B (TMSB15B), mRNA [NM_194324]                                                           | 286527 |
| A_23_P48264  | -5.5 | 1.2  | -1.3 | 1.1  | TMTC3   | Homo sapiens transmembrane and tetratricopeptide repeat containing 3 (TMTC3), mRNA [NM_181783]                       | 160418 |
| A_24_P278853 | -2.4 | -2.2 | -7.7 | -4.9 | TMTC4   | Homo sapiens transmembrane and tetratricopeptide repeat containing 4 (TMTC4), transcript variant 1, mRNA [NM_032813] | 84899  |

|              |      |      |      |      |       |                                                                                                                   |       |
|--------------|------|------|------|------|-------|-------------------------------------------------------------------------------------------------------------------|-------|
| A_23_P31195  | 3.6  | 1.3  | -1.1 | -2.8 | TMUB1 | Homo sapiens transmembrane and ubiquitin-like domain containing 1 (TMUB1), transcript variant 1, mRNA [NM_031434] | 83590 |
| A_23_P76951  | 2.1  | 1.4  | 1.4  | 1.3  | TMX1  | Homo sapiens thioredoxin-related transmembrane protein 1 (TMX1), mRNA [NM_030755]                                 | 81542 |
| A_24_P417281 | 1.0  | -1.0 | -3.7 | -1.0 | TMX3  | Homo sapiens thioredoxin-related transmembrane protein 3 (TMX3), mRNA [NM_019022]                                 | 54495 |
| A_24_P250535 | -1.0 | -1.0 | -4.1 | -1.0 | TMX4  | Homo sapiens thioredoxin-related transmembrane protein 4 (TMX4), mRNA [NM_021156]                                 | 56255 |



|              |      |      |      |      |         |                                                                                                                  |       |
|--------------|------|------|------|------|---------|------------------------------------------------------------------------------------------------------------------|-------|
| A_24_P919311 | 3.1  | 3.4  | 6.7  | 2.9  | TNC     | tenascin C<br>[Source:HGNC<br>Symbol;Accession:5318]<br>[ENST00000481475]                                        | 3371  |
| A_24_P157926 | -2.5 | -7.1 | -9.5 | 1.6  | TNFAIP3 | Homo sapiens tumor necrosis factor, alpha-induced protein 3 (TNFAIP3), mRNA<br>[NM_006290]                       | 7128  |
| A_32_P219520 | 1.9  | 1.6  | -1.1 | -3.0 | TNFAIP8 | Homo sapiens tumor necrosis factor, alpha-induced protein 8 (TNFAIP8), transcript variant 1, mRNA<br>[NM_014350] | 25816 |

|              |      |      |      |      |           |                                                                                                                         |        |
|--------------|------|------|------|------|-----------|-------------------------------------------------------------------------------------------------------------------------|--------|
| A_23_P428875 | 1.7  | -3.8 | 1.6  | 1.6  | TNFAIP8L1 | Homo sapiens tumor necrosis factor, alpha-induced protein 8-like 1 (TNFAIP8L1), transcript variant 2, mRNA [NM_152362]  | 126282 |
| A_24_P375482 | 2.0  | 2.2  | 1.2  | 1.9  | TNFAIP8L3 | Homo sapiens tumor necrosis factor, alpha-induced protein 8-like 3 (TNFAIP8L3), mRNA [NM_207381]                        | 388121 |
| A_24_P211106 | -1.3 | -7.8 | -1.1 | -1.5 | TNFRSF11A | tumor necrosis factor receptor superfamily, member 11a, NFKB activator [Source:HGNC Symbol;Acc:11908] [ENST00000382790] | 8792   |

|              |      |      |      |      |           |                                                                                                   |        |
|--------------|------|------|------|------|-----------|---------------------------------------------------------------------------------------------------|--------|
| A_24_P192485 | -2.4 | -1.8 | -1.1 | -1.0 | TNFRSF11B | Homo sapiens tumor necrosis factor receptor superfamily, member 11b (TNFRSF11B), mRNA [NM_002546] | 4982   |
| A_23_P91764  | 21.5 | 13.4 | 5.9  | 15.4 | TNFRSF13C | Homo sapiens tumor necrosis factor receptor superfamily, member 13C (TNFRSF13C), mRNA [NM_052945] | 115650 |
| A_23_P126908 | -1.0 | -5.0 | -2.8 | -1.1 | TNFRSF14  | Homo sapiens tumor necrosis factor receptor superfamily, member 14 (TNFRSF14), mRNA [NM_003820]   | 8764   |

|              |      |       |      |      |          |                                                                                                                       |       |
|--------------|------|-------|------|------|----------|-----------------------------------------------------------------------------------------------------------------------|-------|
| A_24_P56310  | -3.2 | -1.9  | -1.5 | 1.4  | TNFRSF19 | Homo sapiens tumor necrosis factor receptor superfamily, member 19 (TNFRSF19), transcript variant 2, mRNA [NM_148957] | 55504 |
| A_23_P140057 | 1.0  | -10.4 | 1.6  | -1.8 | TNFRSF19 | Homo sapiens tumor necrosis factor receptor superfamily, member 19 (TNFRSF19), transcript variant 1, mRNA [NM_018647] | 55504 |
| A_24_P364363 | 6.5  | 42.3  | 29.0 | 33.2 | TNFRSF1A | Homo sapiens tumor necrosis factor receptor superfamily, member 1A (TNFRSF1A), mRNA [NM_001065]                       | 7132  |

|              |      |      |      |     |          |                                                                                                                     |       |
|--------------|------|------|------|-----|----------|---------------------------------------------------------------------------------------------------------------------|-------|
| A_23_P30666  | 1.6  | -2.6 | 1.1  | 1.9 | TNFRSF21 | Homo sapiens tumor necrosis factor receptor superfamily, member 21 (TNFRSF21), mRNA [NM_014452]                     | 27242 |
| A_23_P218646 | -2.2 | 1.0  | -1.0 | 2.0 | TNFRSF6B | Homo sapiens tumor necrosis factor receptor superfamily, member 6b, decoy (TNFRSF6B), mRNA [NM_003823]              | 8771  |
| A_23_P500614 | 3.5  | 1.5  | 2.7  | 1.9 | TNFRSF8  | Homo sapiens tumor necrosis factor receptor superfamily, member 8 (TNFRSF8), transcript variant 1, mRNA [NM_001243] | 943   |

|              |      |      |      |      |         |                                                                                                                      |      |
|--------------|------|------|------|------|---------|----------------------------------------------------------------------------------------------------------------------|------|
| A_23_P94754  | -3.0 | -1.8 | -4.7 | -2.5 | TNFSF15 | Homo sapiens tumor necrosis factor (ligand) superfamily, member 15 (TNFSF15), transcript variant 1, mRNA [NM_005118] | 9966 |
| A_24_P167012 | 1.6  | -2.5 | -2.2 | 1.1  | TNFSF15 | Homo sapiens tumor necrosis factor (ligand) superfamily, member 15 (TNFSF15), transcript variant 1, mRNA [NM_005118] | 9966 |
| A_23_P126836 | 1.1  | 1.0  | -3.3 | 5.5  | TNFSF4  | Homo sapiens tumor necrosis factor (ligand) superfamily, member 4 (TNFSF4), mRNA [NM_003326]                         | 7292 |

|              |     |      |      |      |      |                                                                                                         |       |
|--------------|-----|------|------|------|------|---------------------------------------------------------------------------------------------------------|-------|
| A_23_P107064 | 2.4 | 1.2  | 2.6  | 1.8  | TNK1 | Homo sapiens tyrosine kinase, non-receptor, 1 (TNK1), transcript variant 2, mRNA [NM_003985]            | 8711  |
| A_24_P94643  | 1.6 | -1.2 | -2.1 | -1.1 | TNK2 | Homo sapiens tyrosine kinase, non-receptor, 2 (TNK2), transcript variant 2, mRNA [NM_001010938]         | 10188 |
| A_32_P144596 | 1.3 | 2.4  | -1.4 | -3.3 | TNKS | Homo sapiens tankyrase, TRF1-interacting ankyrin-related ADP-ribose polymerase (TNKS), mRNA [NM_003747] | 8658  |

|              |      |       |      |      |          |                                                                                                         |       |
|--------------|------|-------|------|------|----------|---------------------------------------------------------------------------------------------------------|-------|
| A_23_P323252 | 2.8  | 2.9   | 1.1  | 1.6  | TNKS     | Homo sapiens tankyrase, TRF1-interacting ankyrin-related ADP-ribose polymerase (TNKS), mRNA [NM_003747] | 8658  |
| A_23_P418597 | -3.6 | -1.9  | -2.6 | -4.3 | TNKS1BP1 | Homo sapiens tankyrase 1 binding protein 1, 182kDa (TNKS1BP1), mRNA [NM_033396]                         | 85456 |
| A_23_P125588 | 2.1  | 1.8   | 1.0  | -1.1 | TNMD     | Homo sapiens tenomodulin (TNMD), mRNA [NM_022144]                                                       | 64102 |
| A_32_P480177 | 1.0  | -18.4 | -1.1 | -1.0 | TNN      | Homo sapiens tenascin N (TNN), mRNA [NM_022093]                                                         | 63923 |
| A_23_P166823 | 1.0  | 1.7   | -2.2 | 1.5  | TNNC1    | Homo sapiens troponin C type 1 (slow) (TNNC1), mRNA [NM_003280]                                         | 7134  |



|              |      |      |      |      |        |                                                                                                    |       |
|--------------|------|------|------|------|--------|----------------------------------------------------------------------------------------------------|-------|
| A_23_P131825 | -1.1 | -5.4 | -1.2 | 1.7  | TNNC2  | Homo sapiens troponin C type 2 (fast) (TNNC2), mRNA [NM_003279]                                    | 7125  |
| A_23_P67453  | -2.9 | 2.0  | -1.1 | 1.6  | TNNI3  | Homo sapiens troponin I type 3 (cardiac) (TNNI3), mRNA [NM_000363]                                 | 7137  |
| A_23_P200024 | 1.3  | -1.7 | -1.4 | -3.1 | TNNI3K | Homo sapiens TNNI3 interacting kinase (TNNI3K), mRNA [NM_015978]                                   | 51086 |
| A_23_P56050  | 1.3  | -6.4 | -1.6 | 1.2  | TNNT1  | Homo sapiens troponin T type 1 (skeletal, slow) (TNNT1), transcript variant 2, mRNA [NM_001126132] | 7138  |

|              |      |      |      |      |       |                                                                                                      |      |
|--------------|------|------|------|------|-------|------------------------------------------------------------------------------------------------------|------|
| A_24_P257022 | -2.0 | -1.1 | -1.2 | -2.4 | TNNT2 | Homo sapiens troponin T type 2 (cardiac) (TNNT2), transcript variant 1, mRNA [NM_000364]             | 7139 |
| A_23_P34700  | 2.7  | -1.2 | 2.8  | 1.3  | TNNT2 | Homo sapiens troponin T type 2 (cardiac) (TNNT2), transcript variant 1, mRNA [NM_000364]             | 7139 |
| A_23_P129382 | -5.3 | -2.5 | 1.1  | 2.3  | TNP2  | Homo sapiens transition protein 2 (during histone to protamine replacement) (TNP2), mRNA [NM_005425] | 7142 |
| A_23_P326785 | -2.0 | 1.0  | 1.0  | 1.0  | TNP2  | Homo sapiens transition protein 2 (during histone to protamine replacement) (TNP2), mRNA [NM_005425] | 7142 |

|              |      |      |      |      |        |                                                                                                 |       |
|--------------|------|------|------|------|--------|-------------------------------------------------------------------------------------------------|-------|
| A_23_P156101 | -3.1 | -2.0 | -1.2 | -2.1 | TNPO1  | Homo sapiens<br>transportin 1<br>(TNPO1),<br>transcript<br>variant 1,<br>mRNA<br>[NM_002270]    | 3842  |
| A_24_P44891  | 3.4  | 2.1  | 1.3  | 1.9  | TNPO2  | Homo sapiens<br>transportin 2<br>(TNPO2),<br>transcript<br>variant 2,<br>mRNA<br>[NM_013433]    | 30000 |
| A_23_P45864  | 1.1  | -1.7 | 1.0  | -2.5 | TNR    | Homo sapiens<br>tenascin R<br>(restrictin,<br>janusin)<br>(TNR),<br>mRNA<br>[NM_003285]         | 7143  |
| A_24_P400528 | -1.3 | -1.1 | -2.0 | -1.2 | TNRC18 | Homo sapiens<br>trinucleotide repeat<br>containing<br>18<br>(TNRC18),<br>mRNA<br>[NM_001080495] | 84629 |

|              |      |       |      |      |        |                                                                                                     |       |
|--------------|------|-------|------|------|--------|-----------------------------------------------------------------------------------------------------|-------|
| A_32_P6415   | 1.0  | -1.0  | -2.3 | -1.5 | TNRC6B | Homo sapiens trinucleotide repeat containing 6B (TNRC6B), transcript variant 2, mRNA [NM_015088]    | 23112 |
| A_24_P786172 | 1.1  | -1.0  | -2.2 | -2.5 | TNRC6B | Homo sapiens trinucleotide repeat containing 6B (TNRC6B), transcript variant 2, mRNA [NM_015088]    | 23112 |
| A_23_P392501 | -1.1 | 1.5   | -4.4 | -1.4 | TNRC6C | Homo sapiens trinucleotide repeat containing 6C (TNRC6C), transcript variant 1, mRNA [NM_001142640] | 57690 |
| A_23_P15765  | -1.0 | -23.5 | -1.0 | -1.0 | TNRC6C | Homo sapiens trinucleotide repeat containing 6C (TNRC6C), transcript variant 2, mRNA [NM_018996]    | 57690 |

|              |      |      |      |       |        |                                                                                                                    |       |
|--------------|------|------|------|-------|--------|--------------------------------------------------------------------------------------------------------------------|-------|
| A_24_P718833 | -3.1 | 1.0  | 1.7  | -1.3  | TNRC6C | trinucleoti<br>de repeat<br>containing<br>6C<br>[Source:H<br>GNC<br>Symbol;Ac<br>c:29318]<br>[ENST0000<br>0455761] | 57690 |
| A_24_P136453 | -1.3 | 1.0  | -1.1 | -2.1  | TNS1   | Homo<br>sapiens<br>tensin 1<br>(TNS1),<br>mRNA<br>[NM_0226<br>48]                                                  | 7145  |
| A_23_P351724 | -2.8 | -2.0 | -1.4 | -25.6 | TNS1   | Homo<br>sapiens<br>tensin 1<br>(TNS1),<br>mRNA<br>[NM_0226<br>48]                                                  | 7145  |
| A_23_P215642 | 1.3  | 2.1  | 1.1  | -1.3  | TNS3   | Homo<br>sapiens<br>tensin 3<br>(TNS3),<br>mRNA<br>[NM_0227<br>48]                                                  | 64759 |
| A_23_P156708 | 1.0  | 1.2  | -2.5 | 1.2   | TNXB   | Homo<br>sapiens<br>tenascin<br>XB (TNXB),<br>transcript<br>variant XB-<br>S, mRNA<br>[NM_0324<br>70]               | 7148  |

|              |      |      |      |      |      |                                                                                    |        |
|--------------|------|------|------|------|------|------------------------------------------------------------------------------------|--------|
| A_24_P33217  | 1.9  | 3.2  | 1.6  | -1.4 | TNXB | Homo sapiens tenascin XB (TNXB), transcript variant XB, mRNA [NM_019105]           | 7148   |
| A_24_P15834  | -2.0 | 2.3  | 1.1  | 1.2  | TNXB | Homo sapiens tenascin XB (TNXB), transcript variant XB, mRNA [NM_019105]           | 7148   |
| A_23_P164179 | 1.9  | 2.4  | -1.6 | 1.2  | TOB1 | Homo sapiens transducer of ERBB2, 1 (TOB1), transcript variant 1, mRNA [NM_005749] | 10140  |
| A_24_P19828  | -2.2 | -1.8 | -1.6 | -1.0 | TOE1 | Homo sapiens target of EGR1, member 1 (nuclear) (TOE1), mRNA [NM_025077]           | 114034 |

|              |      |      |      |      |        |                                                                                                  |        |
|--------------|------|------|------|------|--------|--------------------------------------------------------------------------------------------------|--------|
| A_23_P75903  | 1.0  | -5.4 | -5.6 | -2.6 | TOLLIP | Homo sapiens toll interacting protein (TOLLIP), mRNA [NM_019009]                                 | 54472  |
| A_23_P103084 | 2.0  | 3.3  | 3.4  | 1.3  | TOM1   | Homo sapiens target of myb1 (chicken) (TOM1), transcript variant 1, mRNA [NM_005488]             | 10043  |
| A_23_P118493 | -3.8 | 1.3  | 1.3  | -3.0 | TOM1L1 | Homo sapiens target of myb1 (chicken)-like 1 (TOM1L1), mRNA [NM_005486]                          | 10040  |
| A_23_P141180 | 1.0  | 1.0  | -2.8 | 1.4  | TOM1L2 | Homo sapiens target of myb1-like 2 (chicken) (TOM1L2), transcript variant 3, mRNA [NM_001082968] | 146691 |

|              |      |      |      |      |         |                                                                                                                                                           |        |
|--------------|------|------|------|------|---------|-----------------------------------------------------------------------------------------------------------------------------------------------------------|--------|
| A_24_P216765 | -2.7 | -4.1 | -3.2 | -2.4 | TOMM20  | Homo sapiens translocase of outer mitochondrial membrane 20 homolog (yeast) (TOMM20), nuclear gene encoding mitochondrial protein, mRNA [NM_014765]       | 9804   |
| A_24_P117942 | 1.7  | 2.7  | -2.5 | -1.3 | TOMM20L | Homo sapiens translocase of outer mitochondrial membrane 20 homolog (yeast)-like (TOMM20L), nuclear gene encoding mitochondrial protein, mRNA [NM_207377] | 387990 |



|              |       |      |      |      |        |                                                                                                                                                                           |       |
|--------------|-------|------|------|------|--------|---------------------------------------------------------------------------------------------------------------------------------------------------------------------------|-------|
| A_24_P199097 | 1.6   | 4.1  | 2.0  | 2.5  | TOMM34 | Homo sapiens translocase of outer mitochondrial membrane 34 (TOMM34), nuclear gene encoding mitochondrial protein, mRNA [NM_006809]                                       | 10953 |
| A_24_P15754  | -18.9 | -1.1 | -2.1 | -1.0 | TOMM40 | Homo sapiens translocase of outer mitochondrial membrane 40 homolog (yeast) (TOMM40), nuclear gene encoding mitochondrial protein, transcript variant 3, mRNA [NM_006114] | 10452 |

|             |      |     |      |      |         |                                                                                                                                                                            |        |
|-------------|------|-----|------|------|---------|----------------------------------------------------------------------------------------------------------------------------------------------------------------------------|--------|
| A_23_P845   | -2.3 | 1.0 | 1.0  | 1.1  | TOMM40L | Homo sapiens translocase of outer mitochondrial membrane 40 homolog (yeast)-like (TOMM40L), nuclear gene encoding mitochondrial protein, mRNA [NM_032174]                  | 84134  |
| A_32_P75299 | 1.2  | 1.3 | -1.1 | -3.3 | TOMM5   | Homo sapiens translocase of outer mitochondrial membrane 5 homolog (yeast) (TOMM5), nuclear gene encoding mitochondrial protein, transcript variant 3, mRNA [NM_001134484] | 401505 |

|              |      |      |      |      |        |                                                                                                                                                      |           |
|--------------|------|------|------|------|--------|------------------------------------------------------------------------------------------------------------------------------------------------------|-----------|
| A_23_P214474 | 1.6  | 2.3  | 1.9  | 1.5  | TOMM6  | Homo sapiens translocase of outer mitochondrial membrane 6 homolog (yeast) (TOMM6), nuclear gene encoding mitochondrial protein, mRNA [NM_001134493] | 100188893 |
| A_24_P1054   | 1.0  | -3.0 | -1.3 | -1.0 | TONSL  | Homo sapiens tonsoku-like, DNA repair protein (TONSL), mRNA [NM_013432]                                                                              | 4796      |
| A_24_P374382 | -1.0 | -1.0 | -2.1 | -1.6 | TOP1P2 | Homo sapiens topoisomerase (DNA) I pseudogene 2 (TOP1P2), non-coding RNA [NR_001283]                                                                 | 7152      |

|              |      |       |      |      |          |                                                                           |       |
|--------------|------|-------|------|------|----------|---------------------------------------------------------------------------|-------|
| A_23_P121095 | -3.2 | -2.6  | -2.8 | -3.0 | TOP2B    | Homo sapiens topoisomerase (DNA) II beta 180kDa (TOP2B), mRNA [NM_001068] | 7155  |
| A_23_P80213  | 1.2  | -15.7 | -7.9 | -6.4 | TOP3B    | Homo sapiens topoisomerase (DNA) III beta (TOP3B), mRNA [NM_003935]       | 8940  |
| A_24_P267997 | 1.7  | -5.7  | 1.0  | 1.0  | TOR1AIP1 | Homo sapiens torsin A interacting protein 1 (TOR1AIP1), mRNA [NM_015602]  | 26092 |
| A_24_P130962 | -3.0 | -1.3  | -1.3 | 1.1  | TOR3A    | Homo sapiens torsin family 3, member A (TOR3A), mRNA [NM_022371]          | 64222 |

|              |      |      |      |      |          |                                                                                                                                                                          |       |
|--------------|------|------|------|------|----------|--------------------------------------------------------------------------------------------------------------------------------------------------------------------------|-------|
| A_24_P119036 | 5.6  | 7.7  | 5.6  | 3.2  | TOX3     | Homo sapiens TOX high mobility group box family member 3 (TOX3), transcript variant 2, mRNA [NM_001146188]                                                               | 27324 |
| A_24_P152398 | -2.5 | -1.7 | -1.3 | -1.8 | TP53AIP1 | Homo sapiens tumor protein p53 regulated apoptosis inducing protein 1 (TP53AIP1), nuclear gene encoding mitochondrial protein, transcript variant 2, mRNA [NM_001195195] | 63970 |
| A_24_P160969 | 1.0  | -1.0 | -1.0 | -3.2 | TP53I11  | Homo sapiens tumor protein p53 inducible protein 11 (TP53I11), mRNA [NM_001076787]                                                                                       | 9537  |

|              |      |      |      |      |         |                                                                                       |       |
|--------------|------|------|------|------|---------|---------------------------------------------------------------------------------------|-------|
| A_24_P185205 | 1.3  | 1.4  | -1.2 | -5.0 | TP53I13 | Homo sapiens tumor protein p53 inducible protein 13 (TP53I13), mRNA [NM_138349]       | 90313 |
| A_23_P145895 | -1.0 | -1.0 | -1.1 | -4.1 | TP53TG1 | Homo sapiens TP53 target 1 (non-protein coding) (TP53TG1), non-coding RNA [NR_015381] | 11257 |
| A_24_P274842 | 1.2  | 1.1  | -2.6 | -2.7 | TP53TG1 | Homo sapiens TP53 target 1 (non-protein coding) (TP53TG1), non-coding RNA [NR_015381] | 11257 |
| A_23_P37994  | 1.9  | 1.0  | 2.1  | 1.1  | TP53TG3 | Homo sapiens TP53 target 3 (TP53TG3), mRNA [NM_016212]                                | 24150 |

|              |     |     |     |       |         |                                                                                         |       |
|--------------|-----|-----|-----|-------|---------|-----------------------------------------------------------------------------------------|-------|
| A_24_P227971 | 2.9 | 4.4 | 8.6 | 4.0   | TP53TG3 | Homo sapiens TP53 target 3 (TP53TG3), mRNA [NM_016212]                                  | 24150 |
| A_24_P413470 | 3.0 | 3.6 | 2.7 | 3.8   | TP73    | Homo sapiens tumor protein p73 (TP73), transcript variant 1, mRNA [NM_005427]           | 7161  |
| A_24_P582889 | 1.1 | 1.1 | 1.5 | -16.3 | TPBG    | trophoblast glycoprotein [Source:HGNC Symbol;Acc:12004] [ENST00000369750]               | 7162  |
| A_23_P308119 | 3.5 | 2.7 | 1.0 | 1.6   | TPCN1   | Homo sapiens two pore segment channel 1 (TPCN1), transcript variant 2, mRNA [NM_017901] | 53373 |

|              |      |      |      |      |         |                                                                                            |        |
|--------------|------|------|------|------|---------|--------------------------------------------------------------------------------------------|--------|
| A_23_P218086 | 1.2  | -4.6 | 1.0  | -1.3 | TPCN1   | Homo sapiens two pore segment channel 1 (TPCN1), transcript variant 1, mRNA [NM_001143819] | 53373  |
| A_23_P98159  | 1.1  | -2.3 | 1.2  | -1.4 | TPCN2   | Homo sapiens two pore segment channel 2 (TPCN2), mRNA [NM_139075]                          | 219931 |
| A_24_P166807 | 1.5  | -1.5 | -2.7 | -1.9 | TPD52   | Homo sapiens tumor protein D52 (TPD52), transcript variant 1, mRNA [NM_001025252]          | 7163   |
| A_23_P131771 | -1.5 | -3.7 | -1.0 | -2.1 | TPD52L2 | Homo sapiens tumor protein D52-like 2 (TPD52L2), transcript variant 1, mRNA [NM_199360]    | 7165   |



|              |      |      |      |      |         |                                                                                         |       |
|--------------|------|------|------|------|---------|-----------------------------------------------------------------------------------------|-------|
| A_23_P20544  | -1.1 | -1.1 | -2.3 | -1.1 | TPD52L3 | Homo sapiens tumor protein D52-like 3 (TPD52L3), transcript variant 1, mRNA [NM_033516] | 89882 |
| A_24_P309216 | -1.1 | -3.2 | -1.6 | -1.4 | TPD52L3 | Homo sapiens tumor protein D52-like 3 (TPD52L3), transcript variant 1, mRNA [NM_033516] | 89882 |
| A_24_P709844 | 1.0  | -1.0 | -3.0 | -1.0 | TPH1    | tryptophan hydroxylase 1 [Source:HGNC Symbol;Acc:12008] [ENST00000250018]               | 7166  |

|              |      |      |      |      |        |                                                                                            |        |
|--------------|------|------|------|------|--------|--------------------------------------------------------------------------------------------|--------|
| A_24_P358328 | -3.2 | 2.0  | 1.1  | 1.5  | TPI1P2 | Homo sapiens triosephosphate isomerase 1 pseudogene 2 (TPI1P2), non-coding RNA [NR_002187] | 286016 |
| A_24_P44462  | -4.5 | -2.5 | -7.2 | -3.4 | TPM1   | Homo sapiens tropomyosin 1 (alpha) (TPM1), transcript variant 5, mRNA [NM_000366]          | 7168   |
| A_23_P363344 | -1.4 | 1.0  | 1.0  | 2.2  | TPM1   | Homo sapiens tropomyosin 1 (alpha) (TPM1), transcript variant 5, mRNA [NM_000366]          | 7168   |
| A_24_P924721 | 1.4  | 1.1  | -8.3 | 1.3  | TPM1   | Homo sapiens tropomyosin 1 (alpha) (TPM1), transcript variant 6, mRNA [NM_001018008]       | 7168   |

|              |      |      |       |      |      |                                                                                      |      |
|--------------|------|------|-------|------|------|--------------------------------------------------------------------------------------|------|
| A_23_P391586 | 1.0  | 1.0  | -23.6 | -1.0 | TPM1 | Homo sapiens tropomyosin 1 (alpha) (TPM1), transcript variant 3, mRNA [NM_001018004] | 7168 |
| A_32_P119197 | 5.2  | 5.2  | 4.6   | 5.4  | TPM3 | Homo sapiens tropomyosin 3 (TPM3), transcript variant 3, mRNA [NM_001043352]         | 7170 |
| A_32_P162338 | -1.5 | -2.4 | -1.6  | 1.2  | TPM3 | Homo sapiens tropomyosin 3 (TPM3), transcript variant 2, mRNA [NM_153649]            | 7170 |
| A_23_P141974 | -1.5 | -2.1 | -1.2  | 1.4  | TPM4 | Homo sapiens tropomyosin 4 (TPM4), transcript variant 2, mRNA [NM_003290]            | 7171 |

|              |      |      |      |      |       |                                                                                                 |       |
|--------------|------|------|------|------|-------|-------------------------------------------------------------------------------------------------|-------|
| A_24_P82880  | 1.5  | 2.0  | 1.4  | 1.1  | TPM4  | Homo sapiens tropomyosin 4 (TPM4), transcript variant 2, mRNA [NM_003290]                       | 7171  |
| A_24_P257224 | -2.9 | -1.2 | -1.2 | -1.2 | TPO   | Homo sapiens thyroid peroxidase (TPO), transcript variant 1, mRNA [NM_000547]                   | 7173  |
| A_23_P58671  | 2.1  | 2.1  | 2.1  | 2.1  | TPPP  | Homo sapiens tubulin polymerization promoting protein (TPPP), mRNA [NM_007030]                  | 11076 |
| A_23_P26386  | -1.1 | 3.1  | 2.4  | 1.7  | TPPP3 | Homo sapiens tubulin polymerization-promoting protein family member 3 (TPPP3), mRNA [NM_016140] | 51673 |

|              |      |      |      |      |        |                                                                       |        |
|--------------|------|------|------|------|--------|-----------------------------------------------------------------------|--------|
| A_24_P586712 | -1.1 | -1.0 | -1.0 | -7.1 | TPRG1  | Homo sapiens tumor protein p63 regulated 1 (TPRG1), mRNA [NM_198485]  | 285386 |
| A_23_P5757   | 1.1  | 1.0  | -2.9 | 1.0  | TPRKB  | Homo sapiens TP53RK binding protein (TPRKB), mRNA [NM_016058]         | 51002  |
| A_24_P323997 | 2.8  | 2.8  | 2.6  | 2.6  | TPRX1  | Homo sapiens tetrapeptide repeat homeobox 1 (TPRX1), mRNA [NM_198479] | 284355 |
| A_23_P37702  | -2.4 | 1.0  | -1.0 | -1.1 | TPSAB1 | Homo sapiens tryptase alpha/beta 1 (TPSAB1), mRNA [NM_003294]         | 7177   |

|              |      |       |      |      |       |                                                                                                   |      |
|--------------|------|-------|------|------|-------|---------------------------------------------------------------------------------------------------|------|
| A_23_P132226 | 1.0  | -14.2 | 1.0  | -1.1 | TPST2 | Homo sapiens tyrosylprotein sulfotransferase 2 (TPST2), transcript variant 1, mRNA [NM_001008566] | 8459 |
| A_24_P306726 | -1.7 | -1.2  | -2.4 | -8.9 | TPT1  | Homo sapiens tumor protein, translationally-controlled 1 (TPT1), mRNA [NM_003295]                 | 7178 |
| A_24_P179351 | -1.8 | 1.2   | 2.6  | 1.3  | TPT1  | Homo sapiens tumor protein, translationally-controlled 1 (TPT1), mRNA [NM_003295]                 | 7178 |

|              |      |      |      |      |         |                                                                                                                                   |        |
|--------------|------|------|------|------|---------|-----------------------------------------------------------------------------------------------------------------------------------|--------|
| A_24_P118052 | 1.4  | 1.2  | -2.2 | -5.3 | TPTE2   | Homo sapiens transmembrane phosphoinositide 3-phosphatase and tensin homolog 2 (TPTE2), transcript variant 3, mRNA [NM_199254]    | 93492  |
| A_32_P154835 | -1.1 | -2.1 | -1.0 | 1.0  | TPTE2P1 | Homo sapiens transmembrane phosphoinositide 3-phosphatase and tensin homolog 2 pseudogene 1 (TPTE2P1), non-coding RNA [NR_026730] | 646405 |
| A_24_P145268 | 2.7  | 2.7  | 2.6  | 2.8  | TPTE2P2 | Homo sapiens TPTE pseudogene 1, mRNA (cDNA clone IMAGE:5268927). [BC041842]                                                       | 644623 |

|             |      |      |      |      |         |                                                                                                                                   |        |
|-------------|------|------|------|------|---------|-----------------------------------------------------------------------------------------------------------------------------------|--------|
| A_32_P48134 | -2.7 | 1.3  | 1.2  | 1.2  | TPTE2P3 | Homo sapiens transmembrane phosphoinositide 3-phosphatase and tensin homolog 2 pseudogene 3 (TPTE2P3), non-coding RNA [NR_002793] | 220115 |
| A_32_P89827 | -2.9 | -1.1 | -2.1 | -2.2 | TPTE2P6 | Homo sapiens transmembrane phosphoinositide 3-phosphatase and tensin homolog 2 pseudogene 6 (TPTE2P6), non-coding RNA [NR_002815] | 374491 |



|              |       |      |      |       |       |                                                                                          |       |
|--------------|-------|------|------|-------|-------|------------------------------------------------------------------------------------------|-------|
| A_23_P31389  | -26.3 | -1.7 | -1.5 | -43.5 | TRA2A | Homo sapiens transformer 2 alpha homolog (Drosophila) (TRA2A), mRNA [NM_013293]          | 29896 |
| A_24_P145911 | -1.9  | -1.6 | -3.4 | -1.3  | TRA2B | transformer 2 beta homolog (Drosophila) [Source:HGNC Symbol;Acc:10781] [ENST00000342294] | 6434  |
| A_23_P166548 | -2.2  | -4.6 | -5.3 | -2.3  | TRABD | Homo sapiens TraB domain containing (TRABD), mRNA [NM_025204]                            | 80305 |
| A_23_P54649  | 1.4   | 2.4  | 2.1  | 1.2   | TRADD | Homo sapiens TNFRSF1A-associated via death domain (TRADD), mRNA [NM_003789]              | 8717  |

|              |      |      |      |      |          |                                                                                                                        |       |
|--------------|------|------|------|------|----------|------------------------------------------------------------------------------------------------------------------------|-------|
| A_23_P5359   | -1.0 | -1.1 | -5.5 | -1.6 | TRAF3IP1 | Homo sapiens TNF receptor-associated factor 3 interacting protein 1 (TRAF3IP1), transcript variant 1, mRNA [NM_015650] | 26146 |
| A_23_P110879 | -9.4 | 2.0  | 1.8  | 1.7  | TRAF3IP2 | Homo sapiens TRAF3 interacting protein 2 (TRAF3IP2), transcript variant 2, mRNA [NM_147686]                            | 10758 |
| A_23_P323761 | -8.9 | -1.3 | -1.3 | -1.9 | TRAF3IP3 | Homo sapiens TRAF3 interacting protein 3 (TRAF3IP3), mRNA [NM_025228]                                                  | 80342 |

|              |      |      |      |      |        |                                                                                                         |       |
|--------------|------|------|------|------|--------|---------------------------------------------------------------------------------------------------------|-------|
| A_23_P201731 | -1.0 | 1.3  | -2.4 | -6.6 | TRAF5  | Homo sapiens TNF receptor-associated factor 5 (TRAF5), transcript variant 1, mRNA [NM_004619]           | 7188  |
| A_23_P75921  | 1.6  | 1.0  | 2.4  | 1.1  | TRAF6  | Homo sapiens TNF receptor-associated factor 6 (TRAF6), transcript variant 1, mRNA [NM_145803]           | 7189  |
| A_23_P206474 | -1.4 | -1.3 | -1.1 | 2.9  | TRAF7  | Homo sapiens TNF receptor-associated factor 7 (TRAF7), mRNA [NM_032271]                                 | 84231 |
| A_23_P128541 | -2.2 | -1.0 | -1.1 | 1.1  | TRAFD1 | Homo sapiens TRAF-type zinc finger domain containing 1 (TRAFD1), transcript variant 2, mRNA [NM_006700] | 10906 |

|              |      |      |      |      |         |                                                                                                        |        |
|--------------|------|------|------|------|---------|--------------------------------------------------------------------------------------------------------|--------|
| A_23_P170491 | -1.1 | -1.1 | -4.2 | -1.2 | TRAIP   | Homo sapiens TRAF interacting protein (TRAIP), mRNA [NM_005879]                                        | 10293  |
| A_24_P341279 | 3.5  | 2.2  | -1.0 | -1.3 | TRAK1   | Homo sapiens trafficking protein, kinesin binding 1 (TRAK1), transcript variant 2, mRNA [NM_014965]    | 22906  |
| A_23_P132536 | -1.0 | 3.4  | 2.1  | 1.3  | TRAK1   | Homo sapiens trafficking protein, kinesin binding 1 (TRAK1), transcript variant 1, mRNA [NM_001042646] | 22906  |
| A_23_P372974 | -4.1 | 1.0  | -1.0 | -1.0 | TRAM1L1 | Homo sapiens translocation associated membrane protein 1-like 1 (TRAM1L1), mRNA [NM_152402]            | 133022 |

|              |      |     |      |      |           |                                                                                                          |       |
|--------------|------|-----|------|------|-----------|----------------------------------------------------------------------------------------------------------|-------|
| A_23_P58937  | -1.8 | 1.0 | -3.5 | -1.8 | TRAM2     | Homo sapiens translocation associated membrane protein 2 (TRAM2), mRNA [NM_012288]                       | 9697  |
| A_23_P3849   | 1.4  | 2.0 | 1.3  | -1.0 | TRAP1     | Homo sapiens TNF receptor-associated protein 1 (TRAP1), mRNA [NM_016292]                                 | 10131 |
| A_23_P16032  | -1.1 | 1.0 | 1.3  | -2.4 | TRAPPC2P1 | Homo sapiens trafficking protein particle complex 2 pseudogene 1 (TRAPPC2P1), non-coding RNA [NR_002166] | 10597 |
| A_23_P115636 | 1.7  | 1.7 | -1.1 | 2.1  | TRDMT1    | Homo sapiens tRNA aspartic acid methyltransferase 1 (TRDMT1), mRNA [NM_004412]                           | 1787  |

|              |      |      |      |      |        |                                                                                                        |        |
|--------------|------|------|------|------|--------|--------------------------------------------------------------------------------------------------------|--------|
| A_23_P42548  | -1.3 | -1.3 | 1.0  | 2.0  | TRDN   | Homo sapiens triadin (TRDN), transcript variant 1, mRNA [NM_006073]                                    | 10345  |
| A_23_P104819 | -2.1 | -3.9 | 1.1  | -1.8 | TREH   | Homo sapiens trehalase (brush-border membrane glycoprotein) (TREH), mRNA [NM_007180]                   | 11181  |
| A_24_P12397  | 1.0  | 1.2  | -2.1 | -1.5 | TREM2  | Homo sapiens triggering receptor expressed on myeloid cells 2 (TREM2), mRNA [NM_018965]                | 54209  |
| A_23_P156550 | 2.7  | -1.2 | 4.8  | 2.1  | TREML1 | triggering receptor expressed on myeloid cells-like 1 [Source:HGNC Symbol;Acc:20434] [ENST00000437044] | 340205 |

|              |      |      |      |      |        |                                                                                                         |        |
|--------------|------|------|------|------|--------|---------------------------------------------------------------------------------------------------------|--------|
| A_24_P280660 | -1.7 | 1.1  | -1.4 | -2.1 | TREML1 | Homo sapiens triggering receptor expressed on myeloid cells-like 1 (TREML1), mRNA [NM_178174]           | 340205 |
| A_24_P214858 | -1.0 | -1.0 | 2.0  | -1.7 | TREML2 | Homo sapiens triggering receptor expressed on myeloid cells-like 2 (TREML2), mRNA [NM_024807]           | 79865  |
| A_24_P170439 | 1.1  | -3.5 | -1.8 | -2.2 | TREML3 | Homo sapiens triggering receptor expressed on myeloid cells-like 3 (TREML3), non-coding RNA [NR_027256] | 340206 |

|              |      |      |      |      |        |                                                                                               |        |
|--------------|------|------|------|------|--------|-----------------------------------------------------------------------------------------------|--------|
| A_24_P655458 | 1.8  | 2.1  | 1.6  | 1.6  | TREML4 | Homo sapiens triggering receptor expressed on myeloid cells-like 4 (TREML4), mRNA [NM_198153] | 285852 |
| A_24_P217904 | 1.0  | -1.0 | -1.1 | -2.3 | TRERF1 | Homo sapiens transcriptional regulating factor 1 (TRERF1), mRNA [NM_033502]                   | 55809  |
| A_23_P59022  | -2.8 | 1.0  | 1.0  | 1.1  | TRERF1 | Homo sapiens transcriptional regulating factor 1 (TRERF1), mRNA [NM_033502]                   | 55809  |
| A_23_P218879 | -1.7 | -2.3 | -3.8 | -1.7 | TREX1  | Homo sapiens three prime repair exonuclease 1 (TREX1), transcript variant 1, mRNA [NM_016381] | 11277  |



|              |      |      |      |      |       |                                                                                       |       |
|--------------|------|------|------|------|-------|---------------------------------------------------------------------------------------|-------|
| A_23_P219223 | -6.1 | -2.5 | -2.5 | -2.2 | TREX2 | Homo sapiens three prime repair exonuclease 2 (TREX2), mRNA [NM_080701]               | 11219 |
| A_23_P366983 | -1.0 | -1.1 | -1.6 | -2.6 | TRHDE | Homo sapiens thyrotropin-releasing hormone degrading enzyme (TRHDE), mRNA [NM_013381] | 29953 |
| A_23_P123503 | -1.6 | -1.6 | -3.7 | -1.6 | TRIB1 | Homo sapiens tribbles homolog 1 (Drosophila) (TRIB1), mRNA [NM_025195]                | 10221 |
| A_23_P122959 | 9.3  | 9.6  | 9.3  | 5.4  | TRIL  | Homo sapiens TLR4 interactor with leucine-rich repeats (TRIL), mRNA [NM_014817]       | 9865  |

|              |      |      |      |      |        |                                                                                              |       |
|--------------|------|------|------|------|--------|----------------------------------------------------------------------------------------------|-------|
| A_23_P214578 | -1.7 | -1.7 | -2.5 | 1.0  | TRIM10 | Homo sapiens tripartite motif containing 10 (TRIM10), transcript variant 1, mRNA [NM_006778] | 10107 |
| A_24_P166431 | -2.5 | -1.5 | -3.1 | -1.9 | TRIM10 | Homo sapiens tripartite motif containing 10 (TRIM10), transcript variant 1, mRNA [NM_006778] | 10107 |
| A_23_P420831 | 1.8  | 3.8  | 2.4  | 1.7  | TRIM10 | Homo sapiens tripartite motif containing 10 (TRIM10), transcript variant 2, mRNA [NM_052828] | 10107 |
| A_23_P87973  | -1.2 | 1.0  | -1.2 | -3.1 | TRIM13 | Homo sapiens tripartite motif containing 13 (TRIM13), transcript variant 3, mRNA [NM_213590] | 10206 |

|              |       |      |      |      |         |                                                                                              |        |
|--------------|-------|------|------|------|---------|----------------------------------------------------------------------------------------------|--------|
| A_23_P425752 | -1.7  | 1.0  | -3.3 | -1.2 | TRIM14  | Homo sapiens tripartite motif containing 14 (TRIM14), transcript variant 2, mRNA [NM_033219] | 9830   |
| A_23_P216655 | 1.2   | -1.0 | -7.9 | -1.0 | TRIM14  | Homo sapiens tripartite motif containing 14 (TRIM14), transcript variant 1, mRNA [NM_014788] | 9830   |
| A_23_P214554 | -13.5 | -1.0 | -1.1 | 2.0  | TRIM15  | Homo sapiens tripartite motif containing 15 (TRIM15), mRNA [NM_033229]                       | 89870  |
| A_23_P129903 | -2.1  | -1.9 | -1.3 | -2.7 | TRIM16L | Homo sapiens tripartite motif containing 16-like (TRIM16L), mRNA [NM_001037330]              | 147166 |

|              |      |      |      |      |        |                                                                                              |       |
|--------------|------|------|------|------|--------|----------------------------------------------------------------------------------------------|-------|
| A_24_P208909 | -4.7 | -1.0 | -1.1 | -1.1 | TRIM2  | Homo sapiens tripartite motif containing 2 (TRIM2), transcript variant 1, mRNA [NM_015271]   | 23321 |
| A_23_P47691  | 1.0  | 1.0  | 2.0  | 1.0  | TRIM21 | Homo sapiens tripartite motif containing 21 (TRIM21), mRNA [NM_003141]                       | 6737  |
| A_24_P172481 | 1.0  | -2.7 | -1.1 | -1.1 | TRIM22 | Homo sapiens tripartite motif containing 22 (TRIM22), transcript variant 1, mRNA [NM_006074] | 10346 |
| A_24_P898583 | -8.1 | 1.5  | 1.4  | 1.0  | TRIM26 | Homo sapiens tripartite motif containing 26 (TRIM26), transcript variant 1, mRNA [NM_003449] | 7726  |

|              |      |      |      |      |        |                                                                                              |       |
|--------------|------|------|------|------|--------|----------------------------------------------------------------------------------------------|-------|
| A_24_P377394 | 1.2  | 1.5  | -7.8 | 1.1  | TRIM26 | Homo sapiens tripartite motif containing 26 (TRIM26), transcript variant 1, mRNA [NM_003449] | 7726  |
| A_24_P163405 | 5.1  | 6.7  | 5.4  | 1.7  | TRIM27 | Homo sapiens tripartite motif containing 27 (TRIM27), mRNA [NM_006510]                       | 5987  |
| A_23_P89884  | 1.8  | 2.2  | 1.6  | 1.3  | TRIM28 | Homo sapiens tripartite motif containing 28 (TRIM28), mRNA [NM_005762]                       | 10155 |
| A_23_P203267 | -6.4 | -1.2 | -1.8 | -1.4 | TRIM29 | Homo sapiens tripartite motif containing 29 (TRIM29), mRNA [NM_012101]                       | 23650 |

|              |      |      |      |      |        |                                                                                              |       |
|--------------|------|------|------|------|--------|----------------------------------------------------------------------------------------------|-------|
| A_23_P340123 | -4.8 | 1.1  | -1.6 | -1.3 | TRIM29 | Homo sapiens tripartite motif containing 29 (TRIM29), mRNA [NM_012101]                       | 23650 |
| A_23_P122493 | -3.9 | -2.1 | -1.2 | -5.2 | TRIM31 | Homo sapiens tripartite motif containing 31 (TRIM31), mRNA [NM_007028]                       | 11074 |
| A_24_P34344  | -1.3 | -1.3 | -1.3 | -2.1 | TRIM33 | Homo sapiens tripartite motif containing 33 (TRIM33), transcript variant b, mRNA [NM_033020] | 51592 |
| A_23_P23526  | -2.7 | -2.7 | -2.8 | 2.2  | TRIM33 | Homo sapiens tripartite motif containing 33 (TRIM33), transcript variant b, mRNA [NM_033020] | 51592 |

|              |      |       |      |      |        |                                                                                                 |       |
|--------------|------|-------|------|------|--------|-------------------------------------------------------------------------------------------------|-------|
| A_24_P398323 | 1.6  | -2.0  | -1.0 | 2.1  | TRIM34 | Homo sapiens tripartite motif containing 34 (TRIM34), transcript variant 4, mRNA [NM_001003827] | 53840 |
| A_23_P124190 | -1.0 | -1.0  | -1.0 | -3.5 | TRIM34 | Homo sapiens tripartite motif containing 34 (TRIM34), transcript variant 3, mRNA [NM_130390]    | 53840 |
| A_24_P153853 | -1.0 | -24.1 | 1.0  | -1.0 | TRIM37 | Homo sapiens tripartite motif containing 37 (TRIM37), transcript variant 2, mRNA [NM_001005207] | 4591  |
| A_24_P294851 | 1.3  | -3.8  | 1.6  | -2.4 | TRIM38 | Homo sapiens tripartite motif containing 38 (TRIM38), mRNA [NM_006355]                          | 10475 |

|              |      |       |      |      |        |                                                                                              |        |
|--------------|------|-------|------|------|--------|----------------------------------------------------------------------------------------------|--------|
| A_24_P89413  | 1.0  | -3.0  | 1.1  | 1.0  | TRIM39 | Homo sapiens tripartite motif containing 39 (TRIM39), transcript variant 1, mRNA [NM_021253] | 56658  |
| A_24_P894776 | -3.4 | 1.0   | 1.0  | 1.1  | TRIM40 | tripartite motif containing 40 [Source:HGNC Symbol;Acc:18736] [ENST00000462556]              | 135644 |
| A_23_P402778 | 1.0  | -1.0  | -2.8 | -1.1 | TRIM40 | Homo sapiens tripartite motif containing 40 (TRIM40), mRNA [NM_138700]                       | 135644 |
| A_23_P167521 | 1.5  | -14.8 | 2.3  | 1.1  | TRIM41 | Homo sapiens tripartite motif containing 41 (TRIM41), transcript variant 1, mRNA [NM_033549] | 90933  |



|              |      |      |      |      |        |                                                                                              |        |
|--------------|------|------|------|------|--------|----------------------------------------------------------------------------------------------|--------|
| A_24_P937656 | 5.5  | 2.0  | 4.1  | 5.0  | TRIM42 | Homo sapiens mRNA; cDNA DKFZp434A029 (from clone DKFZp434A029). [AL833848]                   | 287015 |
| A_23_P17173  | -2.5 | -3.8 | -1.2 | 2.3  | TRIM43 | Homo sapiens tripartite motif containing 43 (TRIM43), mRNA [NM_138800]                       | 129868 |
| A_23_P139297 | 2.7  | 2.6  | 1.5  | 2.4  | TRIM44 | Homo sapiens tripartite motif containing 44 (TRIM44), mRNA [NM_017583]                       | 54765  |
| A_23_P160523 | -1.3 | 1.1  | -2.1 | -2.0 | TRIM45 | Homo sapiens tripartite motif containing 45 (TRIM45), transcript variant 1, mRNA [NM_025188] | 80263  |

|              |      |      |      |       |        |                                                                                              |       |
|--------------|------|------|------|-------|--------|----------------------------------------------------------------------------------------------|-------|
| A_23_P46222  | -1.1 | -1.2 | -2.3 | 1.3   | TRIM46 | tripartite motif containing 46 [Source:HGNC Symbol;Acc:19019] [ENST00000368385]              | 80128 |
| A_23_P64306  | -1.1 | 2.6  | 1.7  | 1.4   | TRIM48 | Homo sapiens tripartite motif containing 48 (TRIM48), mRNA [NM_024114]                       | 79097 |
| A_23_P350107 | -1.2 | -1.2 | -1.3 | -27.4 | TRIM56 | Homo sapiens tripartite motif containing 56 (TRIM56), mRNA [NM_030961]                       | 81844 |
| A_23_P201901 | 1.2  | 3.5  | 1.4  | 1.1   | TRIM58 | Homo sapiens mRNA; cDNA DKFZp686N09198 (from clone DKFZp686N09198); complete cds. [BX537432] | 25893 |

|              |      |      |      |      |        |                                                                        |        |
|--------------|------|------|------|------|--------|------------------------------------------------------------------------|--------|
| A_23_P314052 | -1.0 | -1.0 | 5.0  | -1.9 | TRIM58 | Homo sapiens tripartite motif containing 58 (TRIM58), mRNA [NM_015431] | 25893  |
| A_32_P72341  | -6.0 | -1.0 | -1.0 | -1.0 | TRIM59 | Homo sapiens tripartite motif containing 59 (TRIM59), mRNA [NM_173084] | 286827 |
| A_24_P139867 | -1.1 | -2.9 | -2.1 | -1.7 | TRIM62 | Homo sapiens tripartite motif containing 62 (TRIM62), mRNA [NM_018207] | 55223  |
| A_23_P250485 | -3.5 | -2.5 | -2.6 | -2.4 | TRIM62 | Homo sapiens tripartite motif containing 62 (TRIM62), mRNA [NM_018207] | 55223  |

|              |      |      |      |      |        |                                                                                              |        |
|--------------|------|------|------|------|--------|----------------------------------------------------------------------------------------------|--------|
| A_24_P139861 | 1.8  | 3.9  | 2.2  | 1.7  | TRIM62 | Homo sapiens tripartite motif containing 62 (TRIM62), mRNA [NM_018207]                       | 55223  |
| A_23_P112602 | 2.1  | 4.1  | 2.1  | 1.5  | TRIM62 | Homo sapiens tripartite motif containing 62 (TRIM62), mRNA [NM_018207]                       | 55223  |
| A_32_P396186 | -1.0 | -1.0 | -1.0 | -2.3 | TRIM66 | Homo sapiens tripartite motif containing 66 (TRIM66), mRNA [NM_014818]                       | 9866   |
| A_23_P48826  | 1.5  | 3.4  | -1.3 | 1.0  | TRIM69 | Homo sapiens tripartite motif containing 69 (TRIM69), transcript variant a, mRNA [NM_182985] | 140691 |

|              |      |      |      |      |        |                                                                                            |        |
|--------------|------|------|------|------|--------|--------------------------------------------------------------------------------------------|--------|
| A_24_P286190 | 2.9  | 4.1  | -1.3 | -1.1 | TRIM7  | Homo sapiens tripartite motif containing 7 (TRIM7), transcript variant 6, mRNA [NM_033342] | 81786  |
| A_24_P109375 | 1.8  | 4.0  | 2.8  | 1.4  | TRIM74 | Homo sapiens tripartite motif containing 74 (TRIM74), mRNA [NM_198853]                     | 378108 |
| A_23_P205637 | 4.5  | -1.0 | 3.8  | 4.3  | TRIM9  | Homo sapiens tripartite motif containing 9 (TRIM9), transcript variant 1, mRNA [NM_015163] | 114088 |
| A_24_P42603  | -5.9 | -1.2 | -1.3 | -1.3 | TRIO   | Homo sapiens triple functional domain (PTPRF interacting) (TRIO), mRNA [NM_007118]         | 7204   |

|              |      |      |      |      |        |                                                                                                |       |
|--------------|------|------|------|------|--------|------------------------------------------------------------------------------------------------|-------|
| A_23_P408328 | 6.9  | 2.9  | 4.3  | 8.2  | TRIOBP | Homo sapiens TRIO and F-actin binding protein (TRIOBP), transcript variant 2, mRNA [NM_138632] | 11078 |
| A_23_P50349  | 1.3  | -2.5 | 1.5  | 1.4  | TRIP10 | Homo sapiens thyroid hormone receptor interactor 10 (TRIP10), mRNA [NM_004240]                 | 9322  |
| A_32_P188178 | 1.2  | -1.3 | -1.6 | -2.3 | TRIP12 | Homo sapiens thyroid hormone receptor interactor 12 (TRIP12), mRNA [NM_004238]                 | 9320  |
| A_23_P147984 | 52.1 | 27.7 | 42.4 | 53.0 | TRIP12 | Homo sapiens thyroid hormone receptor interactor 12 (TRIP12), mRNA [NM_004238]                 | 9320  |

|              |      |      |      |      |         |                                                                                                                    |       |
|--------------|------|------|------|------|---------|--------------------------------------------------------------------------------------------------------------------|-------|
| A_23_P16683  | -2.1 | -1.1 | -2.3 | -1.5 | TRMT1   | Homo sapiens TRM1 tRNA methyltransferase 1 homolog (S. cerevisiae) (TRMT1), transcript variant 1, mRNA [NM_017722] | 55621 |
| A_23_P12992  | -1.1 | -2.5 | 1.9  | -1.0 | TRMT112 | Homo sapiens tRNA methyltransferase 11-2 homolog (S. cerevisiae) (TRMT112), mRNA [NM_016404]                       | 51504 |
| A_24_P190877 | 1.1  | -2.3 | -1.1 | -1.0 | TRMT1L  | Homo sapiens TRM1 tRNA methyltransferase 1-like (TRMT1L), transcript variant 1, mRNA [NM_030934]                   | 81627 |

|              |      |      |      |      |        |                                                                                                                       |       |
|--------------|------|------|------|------|--------|-----------------------------------------------------------------------------------------------------------------------|-------|
| A_24_P305662 | 2.0  | -1.0 | 2.1  | 1.0  | TRMT2A | Homo sapiens TRM2 tRNA methyltransferase 2 homolog A (S. cerevisiae) (TRMT2A), transcript variant 1, mRNA [NM_022727] | 27037 |
| A_23_P73604  | -3.2 | 1.8  | -1.2 | 1.3  | TRMT2B | Homo sapiens TRM2 tRNA methyltransferase 2 homolog B (S. cerevisiae) (TRMT2B), transcript variant 1, mRNA [NM_024917] | 79979 |
| A_23_P321630 | 2.0  | 1.4  | -1.0 | -1.2 | TRMT5  | Homo sapiens TRM5 tRNA methyltransferase 5 homolog (S. cerevisiae) (TRMT5), mRNA [NM_020810]                          | 57570 |



|              |      |      |      |      |       |                                                                                                             |       |
|--------------|------|------|------|------|-------|-------------------------------------------------------------------------------------------------------------|-------|
| A_23_P210747 | -1.9 | -2.4 | -1.1 | 1.3  | TRMT6 | Homo sapiens tRNA methyltransferase 6 homolog (S. cerevisiae) (TRMT6), mRNA [NM_015939]                     | 51605 |
| A_24_P916195 | 1.1  | -1.2 | -1.2 | -3.3 | TRMU  | tRNA 5-methylaminomethyl-2-thiouridylate methyltransferase [Source:HGNC Symbol;Acc:25481] [ENST00000486620] | 55687 |

|              |      |      |      |      |          |                                                                                                                                                                     |       |
|--------------|------|------|------|------|----------|---------------------------------------------------------------------------------------------------------------------------------------------------------------------|-------|
| A_23_P80389  | 1.3  | 1.2  | 1.1  | 2.0  | TRMU     | Homo sapiens tRNA 5-methylaminomethyl-2-thiouridylate methyltransferase (TRMU), nuclear gene encoding mitochondrial protein, transcript variant 1, mRNA [NM_018006] | 55687 |
| A_24_P393787 | -3.0 | -1.9 | -2.6 | -2.8 | TRNAU1AP | Homo sapiens tRNA selenocysteine 1 associated protein 1 (TRNAU1AP), transcript variant 1, mRNA [NM_017846]                                                          | 54952 |

|              |      |      |      |      |       |                                                                                                                                 |       |
|--------------|------|------|------|------|-------|---------------------------------------------------------------------------------------------------------------------------------|-------|
| A_23_P372331 | -2.1 | -2.5 | -2.6 | -2.5 | TRNT1 | Homo sapiens tRNA nucleotidyl transferase, CCA-adding, 1 (TRNT1), nuclear gene encoding mitochondrial protein, mRNA [NM_182916] | 51095 |
| A_24_P235338 | 1.6  | -1.9 | 1.5  | 2.1  | TRPA1 | Homo sapiens transient receptor potential cation channel, subfamily A, member 1 (TRPA1), mRNA [NM_007332]                       | 8989  |

|              |      |      |      |     |         |                                                                                                                                                      |       |
|--------------|------|------|------|-----|---------|------------------------------------------------------------------------------------------------------------------------------------------------------|-------|
| A_23_P105873 | 1.1  | -1.1 | 1.5  | 4.9 | TRPC4   | Homo sapiens transient receptor potential cation channel, subfamily C, member 4 (TRPC4), transcript variant alpha, mRNA [NM_016179]                  | 7223  |
| A_23_P154801 | -1.8 | -2.6 | -1.8 | 1.6 | TRPC4AP | Homo sapiens transient receptor potential cation channel, subfamily C, member 4 associated protein (TRPC4AP), transcript variant 1, mRNA [NM_015638] | 26133 |

|              |      |      |      |       |       |                                                                                                                                 |       |
|--------------|------|------|------|-------|-------|---------------------------------------------------------------------------------------------------------------------------------|-------|
| A_23_P129225 | -8.4 | -1.3 | -1.4 | -1.5  | TRPM1 | Homo sapiens transient receptor potential cation channel, subfamily M, member 1 (TRPM1), transcript variant 2, mRNA [NM_002420] | 4308  |
| A_24_P27977  | 2.2  | -1.4 | 2.0  | 2.0   | TRPM2 | Homo sapiens transient receptor potential cation channel, subfamily M, member 2 (TRPM2), transcript variant 1, mRNA [NM_003307] | 7226  |
| A_23_P428973 | -1.7 | -1.7 | -1.9 | -29.0 | TRPM3 | transient receptor potential cation channel, subfamily M, member 3 [Source:HGNC Symbol;Acc:17992] [ENST00000354500]             | 80036 |

|              |      |      |      |      |       |                                                                                                                                    |       |
|--------------|------|------|------|------|-------|------------------------------------------------------------------------------------------------------------------------------------|-------|
| A_23_P136310 | 1.0  | -1.0 | -1.1 | -2.7 | TRPM3 | Homo sapiens transient receptor potential cation channel, subfamily M, member 3 (TRPM3), transcript variant 9, mRNA [NM_001007471] | 80036 |
| A_23_P114061 | -1.1 | 1.2  | -2.3 | 9.4  | TRPM3 | Homo sapiens transient receptor potential cation channel, subfamily M, member 3 (TRPM3), transcript variant 9, mRNA [NM_001007471] | 80036 |
| A_23_P153529 | 2.8  | -1.1 | -1.0 | -1.1 | TRPM4 | Homo sapiens transient receptor potential cation channel, subfamily M, member 4 (TRPM4), transcript variant 1, mRNA [NM_017636]    | 54795 |

|              |      |      |      |      |       |                                                                                                           |       |
|--------------|------|------|------|------|-------|-----------------------------------------------------------------------------------------------------------|-------|
| A_23_P87279  | 1.4  | -1.1 | 1.1  | -2.0 | TRPM5 | Homo sapiens transient receptor potential cation channel, subfamily M, member 5 (TRPM5), mRNA [NM_014555] | 29850 |
| A_23_P134755 | -3.8 | -1.9 | -2.4 | 1.5  | TRPS1 | Homo sapiens trichorhinal ophthalmic syndrome I (TRPS1), mRNA [NM_014112]                                 | 7227  |
| A_23_P98248  | 7.2  | 4.3  | 3.3  | -1.0 | TRPT1 | Homo sapiens tRNA phosphotransferase 1 (TRPT1), transcript variant 1, mRNA [NM_001033678]                 | 83707 |

|              |       |       |      |      |       |                                                                                                           |        |
|--------------|-------|-------|------|------|-------|-----------------------------------------------------------------------------------------------------------|--------|
| A_23_P207911 | 6.7   | 5.8   | 3.8  | 5.3  | TRPV2 | Homo sapiens transient receptor potential cation channel, subfamily V, member 2 (TRPV2), mRNA [NM_016113] | 51393  |
| A_23_P49862  | -21.8 | -25.7 | -5.0 | -1.2 | TRPV3 | Homo sapiens transient receptor potential cation channel, subfamily V, member 3 (TRPV3), mRNA [NM_145068] | 162514 |
| A_23_P93973  | 2.1   | 1.1   | -1.3 | -1.4 | TRPV5 | Homo sapiens transient receptor potential cation channel, subfamily V, member 5 (TRPV5), mRNA [NM_019841] | 56302  |



|              |      |      |      |      |         |                                                                                                           |       |
|--------------|------|------|------|------|---------|-----------------------------------------------------------------------------------------------------------|-------|
| A_23_P71170  | 3.5  | 1.7  | 1.6  | 2.2  | TRPV6   | Homo sapiens transient receptor potential cation channel, subfamily V, member 6 (TRPV6), mRNA [NM_018646] | 55503 |
| A_24_P329635 | -1.0 | -4.6 | -1.7 | -1.2 | TSC1    | Homo sapiens tuberous sclerosis 1 (TSC1), transcript variant 1, mRNA [NM_000368]                          | 7248  |
| A_23_P162739 | 2.3  | 1.6  | 2.5  | 1.0  | TSC22D1 | Homo sapiens TSC22 domain family, member 1 (TSC22D1), transcript variant 1, mRNA [NM_183422]              | 8848  |
| A_24_P337062 | -1.0 | 1.7  | 1.5  | 2.3  | TSC22D2 | Homo sapiens TSC22 domain family, member 2 (TSC22D2), mRNA [NM_014779]                                    | 9819  |

|              |      |       |      |     |         |                                                                                               |        |
|--------------|------|-------|------|-----|---------|-----------------------------------------------------------------------------------------------|--------|
| A_23_P92230  | 2.6  | 1.2   | 3.0  | 4.3 | TSC22D2 | Homo sapiens TSC22 domain family, member 2 (TSC22D2), mRNA [NM_014779]                        | 9819   |
| A_24_P200942 | 1.3  | 1.8   | -2.7 | 1.2 | TSC22D4 | Homo sapiens TSC22 domain family, member 4 (TSC22D4), mRNA [NM_030935]                        | 81628  |
| A_23_P147277 | -3.2 | 2.5   | 2.0  | 5.9 | TSEN54  | Homo sapiens tRNA splicing endonuclease 54 homolog (S. cerevisiae) (TSEN54), mRNA [NM_207346] | 283989 |
| A_23_P75839  | 2.1  | -19.4 | 2.4  | 1.8 | TSG101  | Homo sapiens tumor susceptibility gene 101 (TSG101), mRNA [NM_006292]                         | 7251   |

|              |      |      |      |      |          |                                                                                                     |        |
|--------------|------|------|------|------|----------|-----------------------------------------------------------------------------------------------------|--------|
| A_23_P17103  | -1.0 | -1.0 | 1.0  | -5.2 | TSGA10   | Homo sapiens testis specific, 10 (TSGA10), transcript variant 1, mRNA [NM_025244]                   | 80705  |
| A_23_P306845 | 1.1  | -1.7 | -1.0 | -2.4 | TSGA10IP | Homo sapiens testis specific, 10 interacting protein (TSGA10IP), mRNA [NM_152762]                   | 254187 |
| A_23_P12128  | 1.4  | 1.9  | 2.3  | 1.2  | TSHB     | Homo sapiens thyroid stimulating hormone, beta (TSHB), mRNA [NM_000549]                             | 7252   |
| A_24_P42557  | -1.7 | -2.6 | -1.7 | -1.5 | TSHR     | Homo sapiens thyroid stimulating hormone receptor (TSHR), transcript variant 2, mRNA [NM_001018036] | 7253   |

|              |      |      |      |      |       |                                                                                              |        |
|--------------|------|------|------|------|-------|----------------------------------------------------------------------------------------------|--------|
| A_23_P27381  | 2.8  | 5.3  | 3.0  | 2.3  | TSHZ1 | Homo sapiens teashirt zinc finger homeobox 1 (TSHZ1), mRNA [NM_005786]                       | 10194  |
| A_23_P143247 | 3.0  | 1.3  | 1.8  | 1.1  | TSHZ2 | Homo sapiens teashirt zinc finger homeobox 2 (TSHZ2), transcript variant 1, mRNA [NM_173485] | 128553 |
| A_23_P16275  | -2.8 | -2.1 | -2.4 | -2.3 | TSKS  | Homo sapiens testis-specific serine kinase substrate (TSKS), mRNA [NM_021733]                | 60385  |
| A_23_P28105  | 2.3  | 2.6  | 1.6  | -1.1 | TSN   | Homo sapiens translin (TSN), mRNA [NM_004622]                                                | 7247   |

|              |       |      |       |      |         |                                                                                                    |        |
|--------------|-------|------|-------|------|---------|----------------------------------------------------------------------------------------------------|--------|
| A_23_P319520 | -1.6  | -1.7 | -10.5 | -4.5 | TSNARE1 | Homo sapiens t-SNARE domain containing 1 (TSNARE1), mRNA [NM_145003]                               | 203062 |
| A_32_P161661 | 4.8   | 4.3  | 2.4   | 5.9  | TSNARE1 | Homo sapiens t-SNARE domain containing 1, mRNA (cDNA clone IMAGE:5768818), partial cds. [BC065226] | 203062 |
| A_24_P148151 | -12.9 | 1.3  | 1.2   | 1.1  | TSNAX   | Homo sapiens translin-associated factor X (TSNAX), mRNA [NM_005999]                                | 7257   |
| A_23_P51572  | -1.6  | -2.9 | -1.6  | -1.0 | TSNAX   | Homo sapiens translin-associated factor X (TSNAX), mRNA [NM_005999]                                | 7257   |

|              |      |       |      |      |         |                                                                               |        |
|--------------|------|-------|------|------|---------|-------------------------------------------------------------------------------|--------|
| A_23_P9926   | 1.6  | 1.3   | 2.0  | 1.4  | TSPAN10 | Homo sapiens tetraspanin 10 (TSPAN10), mRNA [NM_031945]                       | 83882  |
| A_23_P76136  | 2.1  | 1.3   | -1.2 | 1.4  | TSPAN11 | Homo sapiens tetraspanin 11 (TSPAN11), mRNA [NM_001080509]                    | 441631 |
| A_23_P168610 | -2.4 | -2.7  | -3.4 | 1.4  | TSPAN13 | Homo sapiens tetraspanin 13 (TSPAN13), mRNA [NM_014399]                       | 27075  |
| A_24_P135483 | -1.2 | -2.2  | 1.2  | -2.6 | TSPAN14 | Homo sapiens tetraspanin 14 (TSPAN14), transcript variant 1, mRNA [NM_030927] | 81619  |
| A_24_P135489 | 1.0  | -12.9 | 1.8  | 1.2  | TSPAN14 | Homo sapiens tetraspanin 14 (TSPAN14), transcript variant 1, mRNA [NM_030927] | 81619  |

|              |      |      |      |      |         |                                                                               |        |
|--------------|------|------|------|------|---------|-------------------------------------------------------------------------------|--------|
| A_32_P91902  | 2.6  | 2.2  | -2.5 | 1.4  | TSPAN14 | Homo sapiens tetraspanin 14 (TSPAN14), transcript variant 1, mRNA [NM_030927] | 81619  |
| A_23_P425516 | -1.8 | -2.2 | -1.0 | -2.3 | TSPAN17 | Homo sapiens tetraspanin 17 (TSPAN17), transcript variant 1, mRNA [NM_012171] | 26262  |
| A_24_P13083  | 1.6  | 2.5  | 1.2  | -1.7 | TSPAN18 | Homo sapiens tetraspanin 18 (TSPAN18), mRNA [NM_130783]                       | 90139  |
| A_23_P2322   | 2.4  | 2.4  | 2.3  | 2.4  | TSPAN19 | Homo sapiens tetraspanin 19 (TSPAN19), mRNA [NM_001100917]                    | 144448 |
| A_24_P62659  | -1.0 | -4.4 | -1.1 | -1.1 | TSPAN2  | Homo sapiens tetraspanin 2 (TSPAN2), mRNA [NM_005725]                         | 10100  |

|              |      |      |      |       |         |                                                                                              |        |
|--------------|------|------|------|-------|---------|----------------------------------------------------------------------------------------------|--------|
| A_32_P123652 | 1.1  | 3.0  | 1.1  | 1.0   | TSPAN33 | Homo sapiens tetraspanin 33 (TSPAN33), mRNA [NM_178562]                                      | 340348 |
| A_23_P60856  | 2.5  | 9.6  | 3.0  | 10.1  | TSPAN4  | Homo sapiens tetraspanin 4 (TSPAN4), transcript variant 1, mRNA [NM_001025237]               | 7106   |
| A_24_P83262  | -1.7 | 1.0  | -1.0 | -14.4 | TSPAN6  | Homo sapiens tetraspanin 6 (TSPAN6), mRNA [NM_003270]                                        | 7105   |
| A_23_P394972 | 1.5  | -1.6 | -4.7 | 1.5   | TSPEAR  | Homo sapiens thrombospondin-type laminin G domain and EAR repeats (TSPEAR), mRNA [NM_144991] | 54084  |



|              |       |      |      |      |         |                                                                                                     |        |
|--------------|-------|------|------|------|---------|-----------------------------------------------------------------------------------------------------|--------|
| A_23_P408341 | -1.8  | -1.8 | -2.1 | -3.8 | TSPY26P | Homo sapiens testis specific protein, Y-linked 26, pseudogene (TSPY26P), non-coding RNA [NR_002781] | 128854 |
| A_24_P179277 | 1.0   | -1.0 | 2.1  | -1.0 | TSPYL1  | Homo sapiens cDNA FLJ39563 fis, clone SKMUS2001164. [AK096882]                                      | 7259   |
| A_23_P110882 | -21.7 | -2.7 | 1.8  | 1.3  | TSPYL4  | Homo sapiens TSPY-like 4 (TSPYL4), mRNA [NM_021648]                                                 | 23270  |
| A_23_P2026   | 1.3   | -4.3 | -1.8 | -1.0 | TSSC4   | Homo sapiens tumor suppressing subtransferable candidate 4 (TSSC4), mRNA [NM_005706]                | 10078  |

|              |     |      |     |      |        |                                                                                              |        |
|--------------|-----|------|-----|------|--------|----------------------------------------------------------------------------------------------|--------|
| A_23_P427136 | 2.5 | 1.2  | 1.9 | 1.7  | TSSK1B | Homo sapiens testis-specific serine kinase 1B (TSSK1B), mRNA [NM_032028]                     | 83942  |
| A_24_P352637 | 1.2 | -3.8 | 1.1 | -1.0 | TSSK4  | Homo sapiens testis-specific serine kinase 4 (TSSK4), transcript variant 2, mRNA [NM_174944] | 283629 |
| A_23_P108221 | 2.9 | 2.8  | 1.7 | 4.0  | TSSK6  | Homo sapiens testis-specific serine kinase 6 (TSSK6), mRNA [NM_032037]                       | 83983  |

|              |     |     |      |      |       |                                                                                                                             |        |
|--------------|-----|-----|------|------|-------|-----------------------------------------------------------------------------------------------------------------------------|--------|
| A_23_P29248  | 4.6 | 4.7 | 6.0  | 2.8  | TST   | Homo sapiens thiosulfate sulfurtransferase (rhodanese) (TST), nuclear gene encoding mitochondrial protein, mRNA [NM_003312] | 7263   |
| A_23_P94301  | 2.2 | 2.3 | 2.5  | 3.2  | TSTA3 | Homo sapiens tissue specific transplantation antigen P35B (TSTA3), mRNA [NM_003313]                                         | 7264   |
| A_24_P224342 | 3.0 | 2.4 | -1.4 | -1.2 | TTBK2 | Homo sapiens tau tubulin kinase 2 (TTBK2), mRNA [NM_173500]                                                                 | 146057 |

|              |      |       |     |      |       |                                                                                     |        |
|--------------|------|-------|-----|------|-------|-------------------------------------------------------------------------------------|--------|
| A_24_P73075  | -1.1 | -3.1  | 1.2 | 1.1  | TTC12 | Homo sapiens tetratricopeptide repeat domain 12 (TTC12), mRNA [NM_017868]           | 54970  |
| A_23_P347131 | -1.3 | -1.5  | 1.0 | -2.8 | TTC15 | tetratricopeptide repeat domain 15 [Source:HGNC Symbol;Acc:24284] [ENST00000304601] | 51112  |
| A_23_P256835 | 2.0  | -10.5 | 1.3 | -1.6 | TTC15 | Homo sapiens tetratricopeptide repeat domain 15 (TTC15), mRNA [NM_016030]           | 51112  |
| A_23_P375419 | 2.7  | 1.8   | 2.2 | 2.0  | TTC16 | Homo sapiens tetratricopeptide repeat domain 16 (TTC16), mRNA [NM_144965]           | 158248 |

|              |     |      |      |      |       |                                                                                                 |       |
|--------------|-----|------|------|------|-------|-------------------------------------------------------------------------------------------------|-------|
| A_23_P414895 | 1.1 | -3.4 | 1.6  | -2.5 | TTC17 | Homo sapiens tetratricopeptide repeat domain 17 (TTC17), mRNA [NM_018259]                       | 55761 |
| A_23_P414899 | 1.6 | -2.1 | 1.2  | -2.9 | TTC17 | Homo sapiens tetratricopeptide repeat domain 17 (TTC17), mRNA [NM_018259]                       | 55761 |
| A_23_P64247  | 1.6 | 2.1  | -2.0 | 1.9  | TTC17 | tetratricopeptide repeat domain 17 [Source:HGNC Symbol;Acc:25596] [ENST0000299240]              | 55761 |
| A_24_P11436  | 2.5 | 1.3  | 2.0  | 1.3  | TTC22 | Homo sapiens tetratricopeptide repeat domain 22 (TTC22), transcript variant 2, mRNA [NM_017904] | 55001 |

|              |      |      |      |      |        |                                                                                                                                       |        |
|--------------|------|------|------|------|--------|---------------------------------------------------------------------------------------------------------------------------------------|--------|
| A_24_P673968 | 2.5  | 1.2  | 1.5  | -1.3 | TTC22  | tetratricop<br>eptide<br>repeat<br>domain 22<br>[Source:H<br>GNC<br>Symbol;Ac<br>c:26067]<br>[ENST0000<br>0371276]                    | 55001  |
| A_23_P140562 | -2.0 | 1.0  | 1.2  | -1.0 | TTC23  | Homo<br>sapiens<br>tetratricop<br>eptide<br>repeat<br>domain 23<br>(TTC23),<br>transcript<br>variant 1,<br>mRNA<br>[NM_0010<br>40655] | 64927  |
| A_23_P390726 | -1.0 | -1.2 | -1.0 | 2.3  | TTC23L | Homo<br>sapiens<br>tetratricop<br>eptide<br>repeat<br>domain 23-<br>like<br>(TTC23L),<br>mRNA<br>[NM_1447<br>25]                      | 153657 |

|              |      |      |      |      |       |                                                                                                 |       |
|--------------|------|------|------|------|-------|-------------------------------------------------------------------------------------------------|-------|
| A_23_P257668 | -1.0 | -2.8 | -1.9 | -1.1 | TTC26 | Homo sapiens tetratricopeptide repeat domain 26 (TTC26), transcript variant 1, mRNA [NM_024926] | 79989 |
| A_23_P131227 | 3.0  | 2.9  | 1.1  | -1.1 | TTC27 | Homo sapiens tetratricopeptide repeat domain 27 (TTC27), transcript variant 1, mRNA [NM_017735] | 55622 |
| A_24_P84984  | 2.6  | 4.7  | 3.6  | 3.5  | TTC3  | Homo sapiens tetratricopeptide repeat domain 3 (TTC3), transcript variant 1, mRNA [NM_003316]   | 7267  |

|              |      |      |      |      |        |                                                                                                      |       |
|--------------|------|------|------|------|--------|------------------------------------------------------------------------------------------------------|-------|
| A_23_P39813  | -2.2 | -2.6 | -1.2 | -1.2 | TTC31  | Homo sapiens tetratricopeptide repeat domain 31 (TTC31), transcript variant 1, mRNA [NM_022492]      | 64427 |
| A_23_P60002  | -1.0 | -2.7 | -2.2 | -1.0 | TTC35  | Homo sapiens tetratricopeptide repeat domain 35 (TTC35), mRNA [NM_014673]                            | 9694  |
| A_23_P160214 | -2.7 | -1.0 | -1.1 | -1.1 | TTC39A | Homo sapiens tetratricopeptide repeat domain 39A (TTC39A), transcript variant 2, mRNA [NM_001080494] | 22996 |



|              |      |      |     |      |        |                                                                                                      |        |
|--------------|------|------|-----|------|--------|------------------------------------------------------------------------------------------------------|--------|
| A_32_P155052 | -1.5 | 2.7  | 2.3 | 2.6  | TTC39C | Homo sapiens tetratricopeptide repeat domain 39C (TTC39C), transcript variant 1, mRNA [NM_001135993] | 125488 |
| A_32_P123629 | 1.2  | 2.3  | 1.1 | 1.0  | TTC39C | Homo sapiens tetratricopeptide repeat domain 39C (TTC39C), transcript variant 1, mRNA [NM_001135993] | 125488 |
| A_23_P230    | -2.2 | -1.0 | 1.6 | -1.9 | TTC4   | Homo sapiens tetratricopeptide repeat domain 4 (TTC4), mRNA [NM_004623]                              | 7268   |
| A_24_P940909 | 2.9  | 2.3  | 2.9 | 3.0  | TTC7A  | Homo sapiens tetratricopeptide repeat domain 7A (TTC7A), mRNA [NM_020458]                            | 57217  |

|              |      |      |     |      |       |                                                                                                                       |        |
|--------------|------|------|-----|------|-------|-----------------------------------------------------------------------------------------------------------------------|--------|
| A_24_P127292 | -2.1 | -1.0 | 1.1 | -1.0 | TTC7B | Homo sapiens tetratricopeptide repeat domain 7B (TTC7B), mRNA [NM_001010854]                                          | 145567 |
| A_24_P273738 | -4.6 | 1.0  | 1.1 | -2.6 | TTC9  | Homo sapiens tetratricopeptide repeat domain 9 (TTC9), mRNA [NM_015351]                                               | 23508  |
| A_23_P332392 | -4.4 | -1.3 | 1.4 | -7.9 | TTC9B | Homo sapiens cDNA FLJ30373 fis, clone BRACE2007882, weakly similar to Actin-depolymerizing protein N-WASP. [AK054935] | 148014 |

|              |      |     |      |      |       |                                                                                                                                                           |        |
|--------------|------|-----|------|------|-------|-----------------------------------------------------------------------------------------------------------------------------------------------------------|--------|
| A_32_P186741 | -1.2 | 1.4 | -2.2 | -1.3 | TTC9C | tetratricop<br>eptide<br>repeat<br>domain 9C<br>[Source:H<br>GNC<br>Symbol;Ac<br>c:28432]<br>[ENST0000<br>0532276]                                        | 283237 |
| A_23_P24751  | 1.3  | 1.3 | -2.8 | -1.5 | TTC9C | Homo<br>sapiens<br>tetratricop<br>eptide<br>repeat<br>domain 9C<br>(TTC9C),<br>mRNA<br>[NM_1738<br>10]                                                    | 283237 |
| A_23_P254031 | -2.2 | 1.0 | 1.0  | 1.1  | TTF1  | Homo<br>sapiens<br>transcripti<br>on<br>terminatio<br>n factor,<br>RNA<br>polymeras<br>e I (TTF1),<br>transcript<br>variant 1,<br>mRNA<br>[NM_0073<br>44] | 7270   |

|              |       |      |      |      |      |                                                                                                      |        |
|--------------|-------|------|------|------|------|------------------------------------------------------------------------------------------------------|--------|
| A_24_P316475 | -2.0  | 1.3  | 1.2  | -1.0 | TTF2 | transcription termination factor, RNA polymerase II [Source:HGNC Symbol;Acc:12398] [ENST00000464062] | 8458   |
| A_23_P97161  | 1.7   | -1.7 | 1.1  | -2.4 | TTF2 | Homo sapiens transcription termination factor, RNA polymerase II (TTF2), mRNA [NM_003594]            | 8458   |
| A_24_P162273 | -12.9 | -1.0 | -1.1 | -1.0 | TTL  | Homo sapiens tubulin tyrosine ligase (TTL), transcript variant TTL-B2, non-coding RNA [NR_024507]    | 646982 |

|              |     |      |      |       |        |                                                                                                            |        |
|--------------|-----|------|------|-------|--------|------------------------------------------------------------------------------------------------------------|--------|
| A_23_P143748 | 1.0 | -1.0 | -1.1 | -30.4 | TTLL12 | Homo sapiens tubulin tyrosine ligase-like family, member 12 (TTLL12), mRNA [NM_015140]                     | 23170  |
| A_24_P917492 | 1.1 | 2.4  | 1.5  | 1.6   | TTLL3  | tubulin tyrosine ligase-like family, member 3 [Source:HGNC Symbol;Acc:24483] [ENST00000492440]             | 26140  |
| A_24_P361408 | 1.0 | -1.0 | -8.9 | -21.9 | TTLL6  | Homo sapiens tubulin tyrosine ligase-like family, member 6 (TTLL6), transcript variant 2, mRNA [NM_173623] | 284076 |

|              |       |     |      |      |       |                                                                                                       |       |
|--------------|-------|-----|------|------|-------|-------------------------------------------------------------------------------------------------------|-------|
| A_32_P204169 | 1.0   | 3.0 | 1.7  | -1.6 | TTLL7 | tubulin tyrosine ligase-like family, member 7 [Source:HGNC Symbol;Acc:26242] [ENST00000477524]        | 79739 |
| A_24_P165450 | -27.2 | 1.1 | 1.1  | 1.1  | TTLL7 | Homo sapiens tubulin tyrosine ligase-like family, member 7 (TTLL7), mRNA [NM_024686]                  | 79739 |
| A_23_P85269  | 1.0   | 1.3 | -2.4 | 1.2  | TTN   | Homo sapiens titin (TTN), transcript variant N2-A, mRNA [NM_133378]                                   | 7273  |
| A_23_P253561 | 2.0   | 1.0 | -1.0 | 1.1  | TTPAL | Homo sapiens tocopherol (alpha) transfer protein-like (TTPAL), transcript variant 1, mRNA [NM_024331] | 79183 |

|              |      |      |      |      |       |                                                                                                               |       |
|--------------|------|------|------|------|-------|---------------------------------------------------------------------------------------------------------------|-------|
| A_23_P11397  | 1.0  | -1.0 | -1.1 | -4.1 | TTY13 | Homo sapiens testis-specific transcript, Y-linked 13 (non-protein coding) (TTY13), non-coding RNA [NR_001537] | 83868 |
| A_23_P251232 | 1.1  | -1.9 | -2.9 | 1.0  | TTY14 | Homo sapiens testis-specific transcript, Y-linked 14 (non-protein coding) (TTY14), non-coding RNA [NR_001543] | 83869 |
| A_32_P413094 | -2.3 | -1.1 | -1.3 | -1.4 | TTY2  | Homo sapiens testis-specific transcript, Y-linked 2 (non-protein coding) (TTY2), non-coding RNA [NR_001536]   | 60439 |

|              |      |      |      |      |       |                                                                                                               |        |
|--------------|------|------|------|------|-------|---------------------------------------------------------------------------------------------------------------|--------|
| A_24_P298723 | -2.9 | -1.0 | -1.1 | -1.1 | TTY20 | Homo sapiens testis-specific transcript, Y-linked 20 (non-protein coding) (TTY20), non-coding RNA [NR_001546] | 252951 |
| A_24_P280328 | 2.2  | 5.8  | -1.9 | -2.6 | TTY3  | Homo sapiens testis-specific transcript, Y-linked 3 (non-protein coding) (TTY3), non-coding RNA [NR_001524]   | 114760 |
| A_23_P251868 | 1.0  | 1.0  | -2.0 | -1.1 | TTY9A | Homo sapiens testis-specific transcript, Y-linked 9A (non-protein coding) (TTY9A), non-coding RNA [NR_001530] | 83864  |



|              |      |      |      |      |       |                                                                                                               |       |
|--------------|------|------|------|------|-------|---------------------------------------------------------------------------------------------------------------|-------|
| A_23_P406242 | 1.0  | -1.0 | -1.1 | -2.4 | TTY9A | Homo sapiens testis-specific transcript, Y-linked 9A (non-protein coding) (TTY9A), non-coding RNA [NR_001530] | 83864 |
| A_23_P50815  | -1.9 | 1.1  | -1.1 | -3.4 | TTYH1 | Homo sapiens tweety homolog 1 (Drosophila) (TTYH1), transcript variant 1, mRNA [NM_020659]                    | 57348 |
| A_24_P99526  | -1.1 | -2.0 | -1.4 | -1.2 | TTYH2 | Homo sapiens tweety homolog 2 (Drosophila) (TTYH2), transcript variant 1, mRNA [NM_032646]                    | 94015 |

|              |      |      |      |      |        |                                                                                            |       |
|--------------|------|------|------|------|--------|--------------------------------------------------------------------------------------------|-------|
| A_23_P66432  | 1.1  | -4.3 | -1.0 | -1.0 | TTYH2  | Homo sapiens tweety homolog 2 (Drosophila) (TTYH2), transcript variant 1, mRNA [NM_032646] | 94015 |
| A_23_P331895 | -1.4 | 1.8  | 1.2  | -2.5 | TTYH3  | Homo sapiens tweety homolog 3 (Drosophila) (TTYH3), mRNA [NM_025250]                       | 80727 |
| A_23_P53110  | -1.5 | -2.3 | -1.6 | -3.1 | TUB    | Homo sapiens tubby homolog (mouse) (TUB), transcript variant 1, mRNA [NM_003320]           | 7275  |
| A_23_P128598 | -1.9 | -1.3 | -2.3 | 1.8  | TUBA3C | Homo sapiens tubulin, alpha 3c (TUBA3C), mRNA [NM_006001]                                  | 7278  |

|              |      |      |      |      |        |                                                                    |        |
|--------------|------|------|------|------|--------|--------------------------------------------------------------------|--------|
| A_23_P56736  | -1.1 | 2.2  | -1.2 | -1.2 | TUBA3D | Homo sapiens tubulin, alpha 3d (TUBA3D), mRNA [NM_080386]          | 113457 |
| A_24_P228550 | 1.9  | -1.3 | -2.2 | -1.8 | TUBB1  | Homo sapiens tubulin, beta 1 class VI (TUBB1), mRNA [NM_030773]    | 81027  |
| A_23_P113656 | 2.6  | 1.2  | 2.8  | -1.4 | TUBB4A | Homo sapiens tubulin, beta 4A class IVa (TUBB4A), mRNA [NM_006087] | 10382  |
| A_23_P312863 | -1.4 | 2.1  | 1.6  | -1.0 | TUBB4B | Homo sapiens tubulin, beta 4B class IVb (TUBB4B), mRNA [NM_006088] | 10383  |
| A_32_P187327 | 1.2  | -2.8 | -1.3 | 1.0  | TUBB4B | Homo sapiens tubulin, beta 4B class IVb (TUBB4B), mRNA [NM_006088] | 10383  |

|              |      |      |      |      |         |                                                                                         |        |
|--------------|------|------|------|------|---------|-----------------------------------------------------------------------------------------|--------|
| A_32_P16315  | 2.8  | 2.7  | -1.0 | 2.7  | TUBB8   | Homo sapiens tubulin, beta 8 class VIII (TUBB8), transcript variant 1, mRNA [NM_177987] | 347688 |
| A_23_P26895  | -1.7 | -2.1 | -1.1 | -1.0 | TUBD1   | Homo sapiens tubulin, delta 1 (TUBD1), transcript variant 1, mRNA [NM_016261]           | 51174  |
| A_23_P145053 | 1.0  | -1.9 | 1.0  | -2.4 | TUBE1   | Homo sapiens tubulin, epsilon 1 (TUBE1), mRNA [NM_016262]                               | 51175  |
| A_32_P105712 | 3.5  | 3.0  | 2.0  | 2.4  | TUBGCP3 | Homo sapiens tubulin, gamma complex associated protein 3 (TUBGCP3), mRNA [NM_006322]    | 10426  |

|              |      |      |      |       |         |                                                                                                            |        |
|--------------|------|------|------|-------|---------|------------------------------------------------------------------------------------------------------------|--------|
| A_24_P313096 | -1.0 | 1.4  | -1.0 | -33.2 | TUBGCP3 | Homo sapiens tubulin, gamma complex associated protein 3 (TUBGCP3), mRNA [NM_006322]                       | 10426  |
| A_23_P152038 | 1.1  | 1.0  | -1.1 | 2.1   | TUBGCP5 | Homo sapiens tubulin, gamma complex associated protein 5 (TUBGCP5), transcript variant 1, mRNA [NM_052903] | 114791 |
| A_23_P6546   | -1.2 | -6.6 | -3.5 | -5.2  | TUBGCP6 | Homo sapiens tubulin, gamma complex associated protein 6 (TUBGCP6), mRNA [NM_020461]                       | 85378  |

|              |      |      |      |      |       |                                                                                            |        |
|--------------|------|------|------|------|-------|--------------------------------------------------------------------------------------------|--------|
| A_24_P382724 | -3.0 | -3.3 | -2.4 | 1.5  | TUG1  | Homo sapiens taurine upregulated 1 (non-protein coding) (TUG1), non-coding RNA [NR_002323] | 55000  |
| A_23_P382045 | -2.1 | 1.1  | 1.1  | 1.1  | TULP4 | Homo sapiens tubby like protein 4 (TULP4), transcript variant 1, mRNA [NM_020245]          | 56995  |
| A_32_P133884 | 1.4  | 1.4  | 1.3  | -3.2 | TUSC1 | Homo sapiens tumor suppressor candidate 1 (TUSC1), mRNA [NM_001004125]                     | 286319 |
| A_23_P251562 | 2.5  | 1.8  | 1.7  | 1.1  | TUSC2 | Homo sapiens tumor suppressor candidate 2 (TUSC2), mRNA [NM_007275]                        | 11334  |

|              |      |      |      |      |        |                                                                                                                      |        |
|--------------|------|------|------|------|--------|----------------------------------------------------------------------------------------------------------------------|--------|
| A_24_P915908 | 1.1  | 1.0  | 2.1  | 1.0  | TUSC3  | Homo sapiens cDNA: FLJ22496 fis, clone HRC11236 . [AK026149]                                                         | 7991   |
| A_23_P308058 | -6.2 | -1.6 | -1.7 | -1.7 | TUSC5  | Homo sapiens tumor suppressor candidate 5 (TUSC5), mRNA [NM_172367]                                                  | 286753 |
| A_24_P178273 | 7.0  | 6.8  | 6.5  | 3.7  | TWF1   | Homo sapiens twinfilin, actin-binding protein, homolog 1 (Drosophila) (TWF1), transcript variant 2, mRNA [NM_002822] | 5756   |
| A_23_P71073  | 12.3 | 11.8 | 10.5 | 7.9  | TWIST1 | Homo sapiens twist homolog 1 (Drosophila) (TWIST1), mRNA [NM_000474]                                                 | 7291   |

|              |      |      |      |      |         |                                                                                    |        |
|--------------|------|------|------|------|---------|------------------------------------------------------------------------------------|--------|
| A_23_P71067  | 1.1  | 1.2  | 2.6  | 1.2  | TWIST1  | Homo sapiens twist homolog 1 (Drosophila) (TWIST1), mRNA [NM_000474]               | 7291   |
| A_23_P82474  | 1.0  | -4.0 | -1.0 | -1.1 | TWISTNB | Homo sapiens TWIST neighbor (TWISTNB), mRNA [NM_001002926]                         | 221830 |
| A_23_P386561 | -1.0 | -1.0 | -1.1 | -4.5 | TWISTNB | Homo sapiens TWIST neighbor (TWISTNB), mRNA [NM_001002926]                         | 221830 |
| A_24_P202497 | -1.1 | -1.1 | -1.1 | -3.9 | TWSG1   | Homo sapiens twisted gastrulation homolog 1 (Drosophila) (TWSG1), mRNA [NM_020648] | 57045  |



|              |     |      |      |     |         |                                                                                                      |        |
|--------------|-----|------|------|-----|---------|------------------------------------------------------------------------------------------------------|--------|
| A_24_P134626 | 2.1 | 2.2  | -1.9 | 1.2 | TXLNG   | Homo sapiens taxilin gamma (TXLNG), transcript variant 1, mRNA [NM_018360]                           | 55787  |
| A_23_P96658  | 2.8 | 2.7  | 2.6  | 2.2 | TXLNG2P | Homo sapiens taxilin gamma 2, pseudogene (TXLNG2P), transcript variant 1, non-coding RNA [NR_045128] | 246126 |
| A_23_P60248  | 2.6 | 2.5  | 2.6  | 1.0 | TXN     | Homo sapiens thioredoxin (TXN), transcript variant 1, mRNA [NM_003329]                               | 7295   |
| A_23_P14939  | 1.5 | -1.1 | 1.1  | 3.4 | TXNDC11 | Homo sapiens thioredoxin domain containing 11 (TXNDC11), mRNA [NM_015914]                            | 51061  |

|              |      |      |      |     |         |                                                                                                   |       |
|--------------|------|------|------|-----|---------|---------------------------------------------------------------------------------------------------|-------|
| A_23_P200199 | 2.4  | 2.2  | 2.5  | 1.3 | TXNDC12 | Homo sapiens thioredoxin domain containing 12 (endoplasmic reticulum) (TXNDC12), mRNA [NM_015913] | 51060 |
| A_23_P398836 | -2.3 | -1.1 | -1.0 | 1.0 | TXNDC16 | Homo sapiens thioredoxin domain containing 16 (TXNDC16), transcript variant 1, mRNA [NM_020784]   | 57544 |
| A_23_P380848 | -1.0 | -1.0 | -1.1 | 6.5 | TXNDC17 | Homo sapiens thioredoxin domain containing 17 (TXNDC17), mRNA [NM_032731]                         | 84817 |

|              |      |      |      |      |        |                                                                                                             |       |
|--------------|------|------|------|------|--------|-------------------------------------------------------------------------------------------------------------|-------|
| A_24_P125434 | -3.3 | -6.6 | -6.4 | -3.5 | TXNDC2 | Homo sapiens thioredoxin domain containing 2 (spermatozoa) (TXNDC2), transcript variant 1, mRNA [NM_032243] | 84203 |
| A_24_P362646 | -1.1 | 1.0  | -9.9 | -3.0 | TXNDC9 | Homo sapiens thioredoxin domain containing 9 (TXNDC9), mRNA [NM_005783]                                     | 10190 |
| A_23_P4522   | -1.0 | -1.0 | -1.0 | -2.1 | TXNL1  | Homo sapiens thioredoxin-like 1 (TXNL1), transcript variant 1, mRNA [NM_004786]                             | 9352  |
| A_24_P399083 | 2.3  | 2.2  | 2.1  | 2.2  | TXNL4B | Homo sapiens thioredoxin-like 4B (TXNL4B), transcript variant 1, mRNA [NM_017853]                           | 54957 |

|             |      |      |      |       |        |                                                                                                            |      |
|-------------|------|------|------|-------|--------|------------------------------------------------------------------------------------------------------------|------|
| A_23_P91802 | 1.1  | -1.4 | 2.1  | -1.4  | TYMP   | Homo sapiens thymidine phosphorylase (TYMP), transcript variant 2, mRNA [NM_001953]                        | 1890 |
| A_23_P35755 | -1.2 | -3.3 | 4.2  | -49.5 | TYR    | Homo sapiens tyrosinase (oculocutaneous albinism IA) (TYR), mRNA [NM_000372]                               | 7299 |
| A_23_P54517 | 3.1  | 5.4  | -1.0 | 2.8   | TYRO3  | Homo sapiens TYRO3 protein tyrosine kinase (TYRO3), mRNA [NM_006293]                                       | 7301 |
| A_23_P27994 | 2.6  | -1.0 | 1.0  | 1.0   | TYROBP | Homo sapiens TYRO protein tyrosine kinase binding protein (TYROBP), transcript variant 1, mRNA [NM_003332] | 7305 |

|              |     |     |      |      |        |                                                                                                                    |        |
|--------------|-----|-----|------|------|--------|--------------------------------------------------------------------------------------------------------------------|--------|
| A_23_P423480 | 2.0 | 1.9 | -1.8 | 1.2  | TYSND1 | Homo sapiens trypsin domain containing 1 (TYSND1), transcript variant 1, mRNA [NM_173555]                          | 219743 |
| A_23_P103180 | 1.1 | 6.6 | -1.1 | -1.0 | TYW3   | Homo sapiens tRNA-yW synthesizing protein 3 homolog (S. cerevisiae) (TYW3), transcript variant 1, mRNA [NM_138467] | 127253 |
| A_23_P103172 | 2.8 | 2.7 | 3.0  | 1.3  | TYW3   | Homo sapiens tRNA-yW synthesizing protein 3 homolog (S. cerevisiae) (TYW3), transcript variant 1, mRNA [NM_138467] | 127253 |

|              |      |      |      |      |        |                                                                                                      |        |
|--------------|------|------|------|------|--------|------------------------------------------------------------------------------------------------------|--------|
| A_24_P20139  | 2.2  | 2.0  | 1.7  | 1.7  | TYW5   | Homo sapiens tRNA-yW synthesizing protein 5 (TYW5), transcript variant 1, mRNA [NM_001039693]        | 129450 |
| A_23_P431418 | 2.2  | -1.8 | 1.4  | -1.4 | U2AF2  | Homo sapiens U2 small nuclear RNA auxiliary factor 2 (U2AF2), transcript variant 1, mRNA [NM_007279] | 11338  |
| A_24_P943106 | 3.3  | 2.9  | 1.5  | 3.7  | U2SURP | Homo sapiens U2 snRNP-associated SURP domain containing (U2SURP), mRNA [NM_001080415]                | 23350  |
| A_24_P323932 | -1.2 | -2.8 | -1.0 | -1.0 | U2SURP | Homo sapiens U2 snRNP-associated SURP domain containing (U2SURP), mRNA [NM_001080415]                | 23350  |

|              |      |       |      |      |        |                                                                                                                               |       |
|--------------|------|-------|------|------|--------|-------------------------------------------------------------------------------------------------------------------------------|-------|
| A_24_P90774  | 1.1  | -1.0  | -1.1 | -2.4 | UACA   | Homo sapiens uveal autoantigen with coiled-coil domains and ankyrin repeats (UACA), transcript variant 2, mRNA [NM_001008224] | 55075 |
| A_23_P135164 | -3.3 | -12.6 | -1.9 | -3.6 | UAP1L1 | Homo sapiens UDP-N-acetylglucosamine pyrophosphorylase 1-like 1 (UAP1L1), mRNA [NM_207309]                                    | 91373 |
| A_24_P237374 | 4.6  | 5.1   | 4.8  | 2.8  | UBA1   | Homo sapiens ubiquitin-like modifier activating enzyme 1 (UBA1), transcript variant 1, mRNA [NM_003334]                       | 7317  |

|              |      |      |      |      |       |                                                                                                                           |       |
|--------------|------|------|------|------|-------|---------------------------------------------------------------------------------------------------------------------------|-------|
| A_24_P376229 | 1.7  | 2.6  | 1.4  | -1.0 | UBA2  | Homo sapiens ubiquitin-like modifier activating enzyme 2 (UBA2), mRNA [NM_005499]                                         | 10054 |
| A_23_P56195  | 1.6  | -1.8 | -2.4 | 1.6  | UBA52 | Homo sapiens ubiquitin A-52 residue ribosomal protein fusion product 1 (UBA52), transcript variant 1, mRNA [NM_001033930] | 7311  |
| A_23_P218905 | -2.4 | -1.5 | -1.6 | -1.7 | UBA6  | Homo sapiens ubiquitin-like modifier activating enzyme 6 (UBA6), mRNA [NM_018227]                                         | 55236 |



|              |      |      |      |      |        |                                                                                             |        |
|--------------|------|------|------|------|--------|---------------------------------------------------------------------------------------------|--------|
| A_23_P139998 | -1.0 | -1.2 | -1.1 | 2.7  | UBAC2  | Homo sapiens UBA domain containing 2 (UBAC2), transcript variant 2, mRNA [NM_177967]        | 337867 |
| A_23_P123866 | 1.0  | 2.2  | 1.4  | -1.7 | UBAP1  | Homo sapiens ubiquitin associated protein 1 (UBAP1), transcript variant 1, mRNA [NM_016525] | 51271  |
| A_24_P682199 | -2.0 | -1.7 | -3.0 | -3.9 | UBAP1L | Homo sapiens mRNA; cDNA DKFZp686J168 (from clone DKFZp686J168). [CR749500]                  | 390595 |
| A_24_P481783 | 1.1  | -1.6 | -2.2 | 1.0  | UBAP1L | Homo sapiens ubiquitin associated protein 1-like (UBAP1L), mRNA [NM_001163692]              | 390595 |

|              |      |      |      |      |        |                                                                                                      |       |
|--------------|------|------|------|------|--------|------------------------------------------------------------------------------------------------------|-------|
| A_24_P933838 | 1.1  | 1.0  | -1.0 | -4.2 | UBAP2L | ubiquitin associated protein 2-like<br>[Source:HGNC Symbol;Acc:29877]<br>[ENST00000493867]           | 9898  |
| A_24_P290927 | -1.3 | -1.4 | -2.3 | -1.3 | UBAP2L | Homo sapiens ubiquitin associated protein 2-like (UBAP2L), transcript variant 1, mRNA<br>[NM_014847] | 9898  |
| A_23_P81898  | 1.1  | 1.1  | -1.2 | -5.7 | UBD    | Homo sapiens ubiquitin D (UBD), mRNA<br>[NM_006398]                                                  | 10537 |
| A_24_P200583 | -1.7 | -2.5 | -1.7 | -1.2 | UBE2B  | Homo sapiens ubiquitin-conjugating enzyme E2B (UBE2B), mRNA<br>[NM_003337]                           | 7320  |

|              |      |      |      |      |         |                                                                                                  |       |
|--------------|------|------|------|------|---------|--------------------------------------------------------------------------------------------------|-------|
| A_23_P167595 | -1.0 | -3.5 | -2.5 | -1.0 | UBE2B   | Homo sapiens ubiquitin-conjugating enzyme E2B (UBE2B), mRNA [NM_003337]                          | 7320  |
| A_24_P626931 | -1.5 | 2.9  | -1.1 | -1.6 | UBE2CBP | Homo sapiens ubiquitin-conjugating enzyme E2C binding protein (UBE2CBP), mRNA [NM_198920]        | 90025 |
| A_23_P365327 | -8.7 | -3.2 | 1.1  | -3.5 | UBE2CBP | ubiquitin-conjugating enzyme E2C binding protein [Source:HGNC Symbol;Acc:21381] [ENST0000369746] | 90025 |

|              |     |     |      |     |        |                                                                                                  |      |
|--------------|-----|-----|------|-----|--------|--------------------------------------------------------------------------------------------------|------|
| A_24_P13032  | 7.1 | 1.5 | 3.3  | 2.0 | UBE2D1 | Homo sapiens ubiquitin-conjugating enzyme E2D 1 (UBE2D1), transcript variant 1, mRNA [NM_003338] | 7321 |
| A_24_P54847  | 2.5 | 2.0 | 2.1  | 2.6 | UBE2D3 | ubiquitin-conjugating enzyme E2D 3 [Source:HGNC Symbol;Acc:12476] [ENST00000453744]              | 7323 |
| A_24_P926684 | 2.4 | 1.2 | -1.2 | 1.9 | UBE2D3 | ubiquitin-conjugating enzyme E2D 3 [Source:HGNC Symbol;Acc:12476] [ENST00000503418]              | 7323 |

|              |      |      |      |      |         |                                                                                                                  |           |
|--------------|------|------|------|------|---------|------------------------------------------------------------------------------------------------------------------|-----------|
| A_23_P374767 | 2.1  | 2.1  | 2.0  | -1.4 | UBE2D4  | Homo sapiens ubiquitin-conjugating enzyme E2D 4 (putative) (UBE2D4), mRNA [NM_015983]                            | 51619     |
| A_23_P367071 | -1.4 | -2.0 | -1.4 | 1.2  | UBE2DNL | Homo sapiens ubiquitin-conjugating enzyme E2D N-terminal like (pseudogene) (UBE2DNL), non-coding RNA [NR_024062] | 100131816 |
| A_24_P148450 | 2.9  | 1.5  | 2.4  | 2.6  | UBE2E3  | Homo sapiens ubiquitin-conjugating enzyme E2E 3 (UBE2E3), transcript variant 1, mRNA [NM_006357]                 | 10477     |

|              |      |      |      |      |        |                                                                                                  |      |
|--------------|------|------|------|------|--------|--------------------------------------------------------------------------------------------------|------|
| A_23_P27066  | 1.1  | -2.4 | 1.2  | 1.3  | UBE2G1 | Homo sapiens ubiquitin-conjugating enzyme E2G 1 (UBE2G1), mRNA [NM_003342]                       | 7326 |
| A_23_P211179 | -1.0 | -1.0 | 1.0  | -4.1 | UBE2G2 | Homo sapiens ubiquitin-conjugating enzyme E2G 2 (UBE2G2), transcript variant 2, mRNA [NM_182688] | 7327 |
| A_23_P145584 | -3.1 | 1.3  | -1.0 | -1.5 | UBE2H  | Homo sapiens ubiquitin-conjugating enzyme E2H (UBE2H), transcript variant 1, mRNA [NM_003344]    | 7328 |

|              |      |       |      |      |       |                                                                                               |      |
|--------------|------|-------|------|------|-------|-----------------------------------------------------------------------------------------------|------|
| A_23_P152107 | -1.5 | -1.6  | -3.8 | -2.5 | UBE2I | Homo sapiens ubiquitin-conjugating enzyme E2I (UBE2I), transcript variant 2, mRNA [NM_194259] | 7329 |
| A_24_P227993 | 1.9  | -6.3  | 1.0  | 1.0  | UBE2I | Homo sapiens ubiquitin-conjugating enzyme E2I (UBE2I), transcript variant 2, mRNA [NM_194259] | 7329 |
| A_24_P277456 | 1.1  | -13.9 | 1.0  | 1.1  | UBE2K | Homo sapiens ubiquitin-conjugating enzyme E2K (UBE2K), transcript variant 1, mRNA [NM_005339] | 3093 |

|              |       |      |      |      |        |                                                                                                 |       |
|--------------|-------|------|------|------|--------|-------------------------------------------------------------------------------------------------|-------|
| A_23_P75741  | -1.0  | -2.5 | -5.8 | -2.5 | UBE2L6 | Homo sapiens ubiquitin-conjugating enzyme E2L6 (UBE2L6), transcript variant 2, mRNA [NM_198183] | 9246  |
| A_23_P116829 | -12.8 | 1.1  | -1.0 | -1.2 | UBE2N  | Homo sapiens ubiquitin-conjugating enzyme E2N (UBE2N), mRNA [NM_003348]                         | 7334  |
| A_32_P11499  | 6.0   | 2.9  | 2.3  | 2.7  | UBE2N  | Homo sapiens ubiquitin-conjugating enzyme E2N (UBE2N), mRNA [NM_003348]                         | 7334  |
| A_23_P97423  | 2.2   | 1.6  | 1.6  | 1.3  | UBE2Q1 | Homo sapiens ubiquitin-conjugating enzyme E2Q family member 1 (UBE2Q1), mRNA [NM_017582]        | 55585 |



|              |      |      |      |      |          |                                                                                                                   |        |
|--------------|------|------|------|------|----------|-------------------------------------------------------------------------------------------------------------------|--------|
| A_24_P412617 | -1.1 | 1.1  | -2.1 | -2.0 | UBE2Q2   | Homo sapiens ubiquitin-conjugating enzyme E2Q family member 2 (UBE2Q2), transcript variant 1, mRNA [NM_173469]    | 92912  |
| A_24_P816384 | 1.6  | 1.4  | 5.3  | 3.1  | UBE2Q2P1 | Homo sapiens ubiquitin-conjugating enzyme E2Q family member 2 pseudogene 1 (UBE2Q2P1), non-coding RNA [NR_003661] | 388165 |
| A_32_P85131  | 1.0  | -1.0 | -1.1 | -3.5 | UBE2QL1  | Homo sapiens ubiquitin-conjugating enzyme E2Q family-like 1 (UBE2QL1), mRNA [NM_001145161]                        | 134111 |

|              |      |      |      |      |        |                                                                                         |        |
|--------------|------|------|------|------|--------|-----------------------------------------------------------------------------------------|--------|
| A_32_P169003 | -1.0 | -1.0 | -1.0 | -3.1 | UBE2R2 | Homo sapiens cDNA clone IMAGE:4825207, ****<br>WARNING: chimeric clone ****, [BC038356] | 54926  |
| A_32_P171328 | 3.0  | 3.8  | 1.7  | 3.4  | UBE2S  | Homo sapiens ubiquitin-conjugating enzyme E2S (UBE2S), mRNA [NM_014501]                 | 27338  |
| A_23_P379657 | 2.2  | 2.1  | -1.7 | 1.9  | UBE2U  | Homo sapiens ubiquitin-conjugating enzyme E2U (putative) (UBE2U), mRNA [NM_152489]      | 148581 |

|              |      |      |      |     |        |                                                                                                            |      |
|--------------|------|------|------|-----|--------|------------------------------------------------------------------------------------------------------------|------|
| A_23_P218685 | -2.0 | -5.8 | 1.4  | 1.3 | UBE2V1 | Homo sapiens ubiquitin-conjugating enzyme E2 variant 1 (UBE2V1), transcript variant 4, mRNA [NM_001032288] | 7335 |
| A_23_P11461  | 1.8  | -1.0 | -2.7 | 1.1 | UBE2V1 | Homo sapiens ubiquitin-conjugating enzyme E2 variant 1 (UBE2V1), transcript variant 4, mRNA [NM_001032288] | 7335 |
| A_24_P406514 | -6.3 | 1.0  | 1.0  | 1.1 | UBE2V2 | Homo sapiens ubiquitin-conjugating enzyme E2 variant 2 (UBE2V2), mRNA [NM_003350]                          | 7336 |

|              |      |      |      |      |       |                                                                                                             |       |
|--------------|------|------|------|------|-------|-------------------------------------------------------------------------------------------------------------|-------|
| A_23_P71430  | -2.6 | -2.7 | 1.1  | -1.1 | UBE2W | Homo sapiens ubiquitin-conjugating enzyme E2W (putative) (UBE2W), transcript variant 1, mRNA [NM_001001481] | 55284 |
| A_24_P346604 | -1.5 | -2.2 | -1.7 | -1.3 | UBE2W | Homo sapiens ubiquitin-conjugating enzyme E2W (putative) (UBE2W), transcript variant 1, mRNA [NM_001001481] | 55284 |
| A_24_P378506 | 1.2  | 1.4  | 2.0  | -1.6 | UBE2Z | Homo sapiens ubiquitin-conjugating enzyme E2Z (UBE2Z), mRNA [NM_023079]                                     | 65264 |

|              |      |      |      |      |       |                                                                                           |       |
|--------------|------|------|------|------|-------|-------------------------------------------------------------------------------------------|-------|
| A_24_P381803 | -3.3 | 1.0  | -1.1 | 1.0  | UBE3A | Homo sapiens ubiquitin protein ligase E3A (UBE3A), transcript variant 3, mRNA [NM_130839] | 7337  |
| A_23_P203137 | -2.8 | 1.1  | 1.1  | 1.1  | UBE4A | Homo sapiens ubiquitination factor E4A (UBE4A), transcript variant 1, mRNA [NM_004788]    | 9354  |
| A_24_P330668 | -3.7 | -2.0 | -2.0 | -2.0 | UBFD1 | Homo sapiens ubiquitin family domain containing 1 (UBFD1), mRNA [NM_019116]               | 56061 |
| A_23_P62361  | 3.4  | 3.1  | 3.0  | 2.1  | UBL4A | Homo sapiens ubiquitin-like 4A (UBL4A), mRNA [NM_014235]                                  | 8266  |

|              |      |      |      |      |        |                                                                                            |        |
|--------------|------|------|------|------|--------|--------------------------------------------------------------------------------------------|--------|
| A_32_P112910 | -1.5 | -1.5 | -2.3 | 1.2  | UBL4B  | Homo sapiens ubiquitin-like 4B (UBL4B), mRNA [NM_203412]                                   | 164153 |
| A_23_P78563  | 1.7  | 1.5  | 2.8  | 1.1  | UBL5   | Homo sapiens ubiquitin-like 5 (UBL5), transcript variant 1, mRNA [NM_024292]               | 59286  |
| A_32_P47566  | -1.0 | -5.0 | -1.0 | -1.0 | UBLCP1 | Homo sapiens ubiquitin-like domain containing CTD phosphatase 1 (UBLCP1), mRNA [NM_145049] | 134510 |
| A_23_P93994  | 28.1 | 17.2 | 31.0 | 20.4 | UBN2   | Homo sapiens ubiuclein 2 (UBN2), mRNA [NM_173569]                                          | 254048 |

|              |     |      |      |      |        |                                                                                        |       |
|--------------|-----|------|------|------|--------|----------------------------------------------------------------------------------------|-------|
| A_24_P23067  | 2.4 | 1.3  | -1.7 | 1.9  | UBOX5  | Homo sapiens U-box domain containing 5 (UBOX5), transcript variant 1, mRNA [NM_014948] | 22888 |
| A_24_P338121 | 1.0 | -2.1 | -1.1 | -1.3 | UBQLN1 | Homo sapiens ubiquilin 1 (UBQLN1), transcript variant 2, mRNA [NM_053067]              | 29979 |
| A_23_P250910 | 1.0 | -2.8 | -1.1 | -1.0 | UBQLN1 | Homo sapiens ubiquilin 1 (UBQLN1), transcript variant 2, mRNA [NM_053067]              | 29979 |
| A_23_P250904 | 1.1 | -7.9 | -1.1 | 1.0  | UBQLN1 | Homo sapiens ubiquilin 1 (UBQLN1), transcript variant 1, mRNA [NM_013438]              | 29979 |

|              |      |      |      |      |        |                                                                                                     |        |
|--------------|------|------|------|------|--------|-----------------------------------------------------------------------------------------------------|--------|
| A_23_P114164 | 1.4  | 5.3  | 6.4  | 2.5  | UBQLN2 | Homo sapiens ubiquilin 2 (UBQLN2), mRNA [NM_013444]                                                 | 29978  |
| A_23_P300770 | -1.0 | -4.6 | 1.5  | -1.0 | UBR1   | Homo sapiens ubiquitin protein ligase E3 component n-recognin 1 (UBR1), mRNA [NM_174916]            | 197131 |
| A_24_P102203 | -1.6 | -1.0 | -3.7 | -1.0 | UBR1   | Homo sapiens ubiquitin protein ligase E3 component n-recognin 1 (UBR1), mRNA [NM_174916]            | 197131 |
| A_23_P5405   | -1.0 | 1.1  | 1.5  | -2.1 | UBR3   | Homo sapiens ubiquitin protein ligase E3 component n-recognin 3 (putative) (UBR3), mRNA [NM_172070] | 130507 |



|              |     |      |      |      |        |                                                                                                                        |        |
|--------------|-----|------|------|------|--------|------------------------------------------------------------------------------------------------------------------------|--------|
| A_24_P285501 | 1.4 | 1.3  | -3.0 | 1.0  | UBR3   | Homo sapiens ubiquitin protein ligase E3 component n-recognin 3 (putative) (UBR3), mRNA [NM_172070]                    | 130507 |
| A_23_P161501 | 2.2 | 1.9  | -1.9 | -1.1 | UBTD1  | Homo sapiens ubiquitin domain containing 1 (UBTD1), mRNA [NM_024954]                                                   | 80019  |
| A_23_P100779 | 1.1 | -3.1 | 1.2  | 1.7  | UBTF   | Homo sapiens upstream binding transcription factor, RNA polymerase I (UBTF), transcript variant 2, mRNA [NM_001076683] | 7343   |
| A_23_P85664  | 2.3 | 1.9  | 1.6  | -1.0 | UBXN10 | Homo sapiens UBX domain protein 10 (UBXN10), mRNA [NM_152376]                                                          | 127733 |

|              |      |      |      |      |        |                                                                                                          |       |
|--------------|------|------|------|------|--------|----------------------------------------------------------------------------------------------------------|-------|
| A_24_P239811 | -2.0 | -2.1 | -1.1 | -2.0 | UBXN11 | Homo sapiens UBX domain protein 11 (UBXN11), transcript variant 2, mRNA [NM_183008]                      | 91544 |
| A_23_P16451  | 1.0  | -8.6 | -1.1 | 3.4  | UBXN6  | Homo sapiens UBX domain protein 6 (UBXN6), transcript variant 1, mRNA [NM_025241]                        | 80700 |
| A_32_P222515 | 1.0  | -6.1 | -4.3 | -1.0 | UBXN7  | UBX domain protein 7 [Source:HGNC Symbol;Acc:29119] [ENST00000296328]                                    | 26043 |
| A_23_P132956 | -1.0 | 1.0  | 1.0  | -3.9 | UCHL1  | Homo sapiens ubiquitin carboxyl-terminal esterase L1 (ubiquitin thiolesterase) (UCHL1), mRNA [NM_004181] | 7345  |

|              |     |      |      |       |       |                                                                                                       |        |
|--------------|-----|------|------|-------|-------|-------------------------------------------------------------------------------------------------------|--------|
| A_24_P188325 | 1.4 | 1.7  | -2.6 | 1.0   | UCHL5 | Homo sapiens ubiquitin carboxyl-terminal hydrolase L5 (UCHL5), transcript variant 1, mRNA [NM_015984] | 51377  |
| A_24_P18270  | 2.7 | 1.7  | 3.3  | 1.0   | UCMA  | Homo sapiens upper zone of growth plate and cartilage matrix associated (UCMA), mRNA [NM_145314]      | 221044 |
| A_23_P155453 | 1.2 | -3.1 | -2.0 | -1.6  | UCN2  | Homo sapiens urocortin 2 (UCN2), mRNA [NM_033199]                                                     | 90226  |
| A_23_P136184 | 1.2 | -1.1 | 1.0  | -10.6 | UCN3  | Homo sapiens urocortin 3 (stresscopin) (UCN3), mRNA [NM_053049]                                       | 114131 |

|              |      |      |      |      |      |                                                                                                                                                                   |      |
|--------------|------|------|------|------|------|-------------------------------------------------------------------------------------------------------------------------------------------------------------------|------|
| A_23_P203601 | -2.4 | -2.3 | -2.1 | -2.4 | UCP3 | Homo sapiens uncoupling protein 3 (mitochondrial, proton carrier) (UCP3), nuclear gene encoding mitochondrial protein, transcript variant long, mRNA [NM_003356]  | 7352 |
| A_24_P292470 | -1.9 | 2.0  | -1.2 | 1.0  | UCP3 | Homo sapiens uncoupling protein 3 (mitochondrial, proton carrier) (UCP3), nuclear gene encoding mitochondrial protein, transcript variant short, mRNA [NM_022803] | 7352 |

|              |      |      |      |      |       |                                                                                                          |       |
|--------------|------|------|------|------|-------|----------------------------------------------------------------------------------------------------------|-------|
| A_23_P166333 | 3.3  | 4.6  | -2.2 | 4.0  | UFD1L | Homo sapiens ubiquitin fusion degradation 1 like (yeast) (UFD1L), transcript variant 1, mRNA [NM_005659] | 7353  |
| A_23_P30956  | -4.2 | -4.4 | -4.7 | -4.4 | UFL1  | Homo sapiens UFM1-specific ligase 1 (UFL1), mRNA [NM_015323]                                             | 23376 |
| A_24_P313109 | 1.1  | 1.0  | -1.1 | -5.3 | UFM1  | Homo sapiens ubiquitin-fold modifier 1 (UFM1), mRNA [NM_016617]                                          | 51569 |
| A_23_P123645 | -4.3 | -1.5 | -1.7 | -1.6 | UGCG  | UDP-glucose ceramide glucosyltransferase [Source:HGNC Symbol;Acc:12524] [ENST00000374279]                | 7357  |

|              |      |      |      |      |       |                                                                                       |       |
|--------------|------|------|------|------|-------|---------------------------------------------------------------------------------------|-------|
| A_24_P44341  | -3.2 | 1.0  | -1.1 | -1.0 | UGGT2 | Homo sapiens UDP-glucose glycoprotein glucosyltransferase 2 (UGGT2), mRNA [NM_020121] | 55757 |
| A_23_P204980 | 1.0  | 1.5  | 2.2  | 1.9  | UGGT2 | Homo sapiens UDP-glucose glycoprotein glucosyltransferase 2 (UGGT2), mRNA [NM_020121] | 55757 |
| A_24_P341909 | 1.7  | -1.0 | 1.5  | -3.5 | UGGT2 | Homo sapiens UDP-glucose glycoprotein glucosyltransferase 2 (UGGT2), mRNA [NM_020121] | 55757 |

|              |     |      |      |      |        |                                                                                                                    |       |
|--------------|-----|------|------|------|--------|--------------------------------------------------------------------------------------------------------------------|-------|
| A_23_P253046 | 1.0 | -3.1 | -1.1 | -1.1 | UGP2   | Homo sapiens UDP-glucose pyrophosphorylase 2 (UGP2), transcript variant 1, mRNA [NM_006759]                        | 7360  |
| A_23_P60599  | 1.2 | -1.7 | -2.4 | -1.1 | UGT1A6 | Homo sapiens UDP glucuronosyltransferase 1 family, polypeptide A6 (UGT1A6), transcript variant 1, mRNA [NM_001072] | 54578 |
| A_23_P158330 | 2.1 | 1.4  | 2.1  | 2.2  | UGT1A8 | Homo sapiens UDP glucuronosyltransferase 1 family, polypeptide A8 (UGT1A8), mRNA [NM_019076]                       | 54576 |

|              |      |      |      |      |         |                                                                                                                      |       |
|--------------|------|------|------|------|---------|----------------------------------------------------------------------------------------------------------------------|-------|
| A_24_P334378 | -4.9 | -1.2 | -1.7 | -1.3 | UGT2A3  | Homo sapiens UDP glucuronosyltransferase 2 family, polypeptide A3 (UGT2A3), mRNA [NM_024743]                         | 79799 |
| A_24_P521559 | 1.9  | 1.9  | 2.8  | 1.0  | UGT2B10 | Homo sapiens UDP glucuronosyltransferase 2 family, polypeptide B10 (UGT2B10), transcript variant 1, mRNA [NM_001075] | 7365  |
| A_23_P212968 | -1.0 | -9.7 | -1.0 | -1.0 | UGT2B11 | Homo sapiens UDP glucuronosyltransferase 2 family, polypeptide B11 (UGT2B11), mRNA [NM_001073]                       | 10720 |



|              |      |      |      |      |         |                                                                                                                      |       |
|--------------|------|------|------|------|---------|----------------------------------------------------------------------------------------------------------------------|-------|
| A_23_P501624 | -3.1 | -2.3 | -1.1 | -1.0 | UGT2B17 | Homo sapiens UDP glucuronosyltransferase 2 family, polypeptide B17 (UGT2B17), mRNA [NM_001077]                       | 7367  |
| A_24_P17691  | -1.3 | -3.0 | -1.4 | -1.5 | UGT2B17 | Homo sapiens UDP glucuronosyltransferase 2 family, polypeptide B17 (UGT2B17), mRNA [NM_001077]                       | 7367  |
| A_24_P180243 | -1.7 | 1.7  | -2.4 | -1.8 | UGT2B28 | Homo sapiens UDP glucuronosyltransferase 2 family, polypeptide B28 (UGT2B28), transcript variant 1, mRNA [NM_053039] | 54490 |

|              |      |      |      |      |        |                                                                                                 |        |
|--------------|------|------|------|------|--------|-------------------------------------------------------------------------------------------------|--------|
| A_23_P386912 | -5.1 | -1.0 | -1.1 | -1.0 | UGT2B4 | Homo sapiens UDP glucuronosyltransferase 2 family, polypeptide B4 (UGT2B4), mRNA [NM_021139]    | 7363   |
| A_23_P72747  | 12.0 | 11.9 | 12.0 | 11.7 | UGT8   | Human ceramide UDPgalactosyltransferase mRNA, complete cds. [U62899]                            | 7368   |
| A_24_P291133 | 1.3  | 1.8  | 2.5  | 3.3  | UHMK1  | Homo sapiens U2AF homology motif (UHM) kinase 1 (UHMK1), transcript variant 1, mRNA [NM_175866] | 127933 |
| A_32_P963    | 2.1  | 2.1  | 2.2  | 2.2  | UHMK1  | Homo sapiens U2AF homology motif (UHM) kinase 1 (UHMK1), transcript variant 1, mRNA [NM_175866] | 127933 |

|              |     |     |     |      |       |                                                                                                       |       |
|--------------|-----|-----|-----|------|-------|-------------------------------------------------------------------------------------------------------|-------|
| A_23_P317691 | 3.6 | 3.0 | 2.0 | 2.9  | UIMC1 | Homo sapiens ubiquitin interaction motif containing 1 (UIMC1), transcript variant 2, mRNA [NM_016290] | 51720 |
| A_24_P73370  | 4.5 | 3.4 | 3.5 | 3.1  | ULK1  | Homo sapiens unc-51-like kinase 1 (C. elegans) (ULK1), mRNA [NM_003565]                               | 8408  |
| A_23_P206103 | 2.9 | 6.2 | 2.6 | 2.6  | ULK3  | Homo sapiens unc-51-like kinase 3 (C. elegans) (ULK3), mRNA [NM_001099436]                            | 25989 |
| A_23_P206107 | 1.3 | 1.5 | 1.6 | -2.3 | ULK3  | Homo sapiens unc-51-like kinase 3 (C. elegans) (ULK3), mRNA [NM_001099436]                            | 25989 |

|              |      |      |      |      |        |                                                                                |        |
|--------------|------|------|------|------|--------|--------------------------------------------------------------------------------|--------|
| A_23_P143926 | -6.0 | 1.0  | -1.4 | 1.1  | ULK4   | Homo sapiens unc-51-like kinase 4 (C. elegans) (ULK4), mRNA [NM_017886]        | 54986  |
| A_23_P158775 | 1.6  | 1.9  | 1.2  | -2.2 | UMOD   | Homo sapiens uromodulin (UMOD), transcript variant 1, mRNA [NM_003361]         | 7369   |
| A_23_P88576  | -1.2 | -1.0 | -4.2 | -1.3 | UNC13C | Homo sapiens unc-13 homolog C (C. elegans) (UNC13C), mRNA [NM_001080534]       | 440279 |
| A_32_P221624 | -1.8 | -2.2 | -1.9 | -1.1 | UNC45A | unc-45 homolog A (C. elegans) [Source:HGNC Symbol;Acc:30594] [ENST00000556319] | 55898  |

|              |      |       |      |      |        |                                                                                                |        |
|--------------|------|-------|------|------|--------|------------------------------------------------------------------------------------------------|--------|
| A_24_P398950 | 1.9  | 2.5   | 2.2  | 1.3  | UNC45A | Homo sapiens unc-45 homolog A (C. elegans) (UNC45A), transcript variant 3, mRNA [NM_001039675] | 55898  |
| A_23_P49677  | -2.3 | -2.4  | -1.8 | -2.4 | UNC45B | Homo sapiens unc-45 homolog B (C. elegans) (UNC45B), transcript variant 1, mRNA [NM_173167]    | 146862 |
| A_23_P110557 | 1.2  | -16.6 | -1.9 | -1.3 | UNC5A  | Homo sapiens unc-5 homolog A (C. elegans) (UNC5A), mRNA [NM_133369]                            | 90249  |
| A_23_P69617  | -2.7 | 1.0   | -2.6 | -2.3 | UNC5C  | Homo sapiens unc-5 homolog C (C. elegans) (UNC5C), mRNA [NM_003728]                            | 8633   |

|              |      |      |      |      |        |                                                                                             |        |
|--------------|------|------|------|------|--------|---------------------------------------------------------------------------------------------|--------|
| A_24_P42624  | -1.1 | -1.4 | -2.6 | -1.3 | UNC5C  | Homo sapiens unc-5 homolog C (C. elegans) (UNC5C), mRNA [NM_003728]                         | 8633   |
| A_23_P350808 | 3.0  | 1.8  | 1.8  | 1.7  | UNC80  | unc-80 homolog (C. elegans) [Source:HGNC Symbol;Acc:26582] [ENST00000489023]                | 285175 |
| A_24_P817863 | 15.2 | 17.1 | 8.1  | 8.5  | UNC80  | Homo sapiens unc-80 homolog (C. elegans) (UNC80), transcript variant 1, mRNA [NM_032504]    | 285175 |
| A_23_P214408 | 1.1  | -1.0 | -1.0 | -3.1 | UNC93A | Homo sapiens unc-93 homolog A (C. elegans) (UNC93A), transcript variant 1, mRNA [NM_018974] | 54346  |

|              |     |      |     |       |         |                                                                                                                      |        |
|--------------|-----|------|-----|-------|---------|----------------------------------------------------------------------------------------------------------------------|--------|
| A_23_P106559 | 1.8 | 2.1  | 2.6 | 1.1   | UNKL    | Homo sapiens unke<br>mpt homolog (Drosophil<br>a)-like (UNKL), transcript<br>variant 1, mRNA [NM_0011<br>93388]      | 64718  |
| A_24_P374675 | 2.9 | -1.2 | 2.5 | 1.7   | UNKL    | Homo sapiens unke<br>mpt homolog (Drosophil<br>a)-like (UNKL), transcript<br>variant 2, mRNA [NM_0010<br>37125]      | 64718  |
| A_24_P929565 | 1.3 | -3.3 | 1.1 | -1.1  | UNQ6975 | Homo sapiens putative uncharact<br>erized protein UNQ6975/<br>PRO21958 (UNQ6975), non-<br>coding RNA [NR_0338<br>31] | 400952 |
| A_23_P120822 | 1.4 | 2.6  | 2.1 | -14.5 | UPB1    | Homo sapiens ureidopro<br>pionase, beta (UPB1), mRNA<br>[NM_0163<br>27]                                              | 51733  |

|              |     |      |      |      |       |                                                                                                                       |       |
|--------------|-----|------|------|------|-------|-----------------------------------------------------------------------------------------------------------------------|-------|
| A_24_P81968  | 4.1 | 3.9  | 1.2  | 2.2  | UPF3A | Homo sapiens UPF3 regulator of nonsense transcripts homolog A (yeast) (UPF3A), transcript variant 1, mRNA [NM_023011] | 65110 |
| A_24_P41690  | 1.0 | 1.1  | -1.0 | -4.1 | UPF3A | Homo sapiens UPF3 regulator of nonsense transcripts homolog A (yeast) (UPF3A), transcript variant 1, mRNA [NM_023011] | 65110 |
| A_24_P348594 | 2.0 | -1.1 | 4.0  | 2.1  | UPK3A | Homo sapiens uroplakin 3A (UPK3A), transcript variant 1, mRNA [NM_006953]                                             | 7380  |



|              |      |      |      |      |       |                                                                                                                                                             |        |
|--------------|------|------|------|------|-------|-------------------------------------------------------------------------------------------------------------------------------------------------------------|--------|
| A_24_P112160 | 1.7  | -4.2 | -1.6 | -1.6 | UPK3B | Homo sapiens uroplakin 3B (UPK3B), transcript variant 1, mRNA [NM_030570]                                                                                   | 80761  |
| A_24_P185986 | -2.3 | -1.1 | -1.2 | -1.2 | UPRT  | Homo sapiens uracil phosphoribosyltransferase (FUR1) homolog (S. cerevisiae) (UPRT), transcript variant 1, mRNA [NM_145052]                                 | 139596 |
| A_24_P65910  | 1.1  | 1.1  | -3.0 | -1.0 | UQCC  | Homo sapiens ubiquinol-cytochrome c reductase complex chaperone (UQCC), nuclear gene encoding mitochondrial protein, transcript variant 1, mRNA [NM_018244] | 55245  |

|             |      |      |      |      |        |                                                                                                                                                                       |       |
|-------------|------|------|------|------|--------|-----------------------------------------------------------------------------------------------------------------------------------------------------------------------|-------|
| A_23_P68866 | 1.3  | 1.1  | 2.2  | 1.0  | UQCR10 | Homo sapiens ubiquinol-cytochrome c reductase, complex III subunit X (UQCR10), nuclear gene encoding mitochondrial protein, transcript variant 2, mRNA [NM_001003684] | 29796 |
| A_23_P31671 | -1.0 | -1.3 | -2.4 | -1.3 | UQCRB  | Homo sapiens ubiquinol-cytochrome c reductase binding protein (UQCRB), nuclear gene encoding mitochondrial protein, transcript variant 1, mRNA [NM_006294]            | 7381  |

|              |      |      |      |      |         |                                                                                                                                                          |      |
|--------------|------|------|------|------|---------|----------------------------------------------------------------------------------------------------------------------------------------------------------|------|
| A_23_P153586 | -2.7 | 1.0  | 1.0  | -1.0 | UQCRFS1 | Homo sapiens ubiquinol-cytochrome c reductase, Rieske iron-sulfur polypeptide 1 (UQCRFS1), nuclear gene encoding mitochondrial protein, mRNA [NM_006003] | 7386 |
| A_23_P57293  | 1.0  | -2.8 | -1.1 | -1.0 | URB1    | Homo sapiens URB1 ribosome biogenesis 1 homolog (S. cerevisiae) (URB1), mRNA [NM_014825]                                                                 | 9875 |
| A_24_P940310 | 2.7  | -1.6 | 2.6  | 1.8  | URB1    | Homo sapiens URB1 ribosome biogenesis 1 homolog (S. cerevisiae) (URB1), mRNA [NM_014825]                                                                 | 9875 |

|              |       |      |      |      |       |                                                                                                                                                |        |
|--------------|-------|------|------|------|-------|------------------------------------------------------------------------------------------------------------------------------------------------|--------|
| A_23_P31489  | -3.4  | 1.1  | -1.3 | -2.9 | URGCP | Homo sapiens upregulator of cell proliferation (URGCP), nuclear gene encoding mitochondrial protein, transcript variant 2, mRNA [NM_001077664] | 55665  |
| A_23_P94689  | -15.8 | -1.1 | -1.0 | -1.5 | URM1  | Homo sapiens ubiquitin related modifier 1 (URM1), transcript variant 1, mRNA [NM_030914]                                                       | 81605  |
| A_24_P415168 | 2.2   | 1.3  | 2.4  | 2.1  | URM1  | Homo sapiens mRNA expressed in placenta. [D83200]                                                                                              | 81605  |
| A_32_P38735  | -1.4  | -1.5 | -1.9 | -2.0 | UROC1 | Homo sapiens urocanase domain containing 1 (UROC1), transcript variant 1, mRNA [NM_144639]                                                     | 131669 |

|              |      |      |      |      |       |                                                                                                                |        |
|--------------|------|------|------|------|-------|----------------------------------------------------------------------------------------------------------------|--------|
| A_23_P35609  | 1.3  | 1.2  | 1.3  | -2.8 | UROS  | Homo sapiens uroporphyrinogen III synthase (UROS), mRNA [NM_000375]                                            | 7390   |
| A_23_P153783 | 1.1  | 2.1  | 2.4  | 1.9  | USF2  | Homo sapiens upstream transcription factor 2, c-fos interacting (USF2), transcript variant 1, mRNA [NM_003367] | 7392   |
| A_23_P127818 | 1.1  | 1.1  | -1.0 | -5.7 | USH1C | Homo sapiens cDNA: FLJ21290 fis, clone COL01954. [AK024943]                                                    | 10083  |
| A_32_P914221 | -2.2 | -1.9 | -1.4 | -2.9 | USH1G | Homo sapiens Usher syndrome 1G (autosomal recessive) (USH1G), mRNA [NM_173477]                                 | 124590 |

|              |      |      |      |      |       |                                                                                                            |        |
|--------------|------|------|------|------|-------|------------------------------------------------------------------------------------------------------------|--------|
| A_23_P86301  | -1.2 | -2.2 | -1.2 | -1.6 | USH2A | Homo sapiens Usher syndrome 2A (autosomal recessive, mild) (USH2A), transcript variant 1, mRNA [NM_007123] | 7399   |
| A_23_P29855  | 1.0  | -9.4 | -1.6 | -1.9 | USO1  | Homo sapiens USO1 vesicle docking protein homolog (yeast) (USO1), mRNA [NM_003715]                         | 8615   |
| A_23_P171366 | 2.8  | 1.6  | 1.4  | 1.3  | USP11 | Homo sapiens ubiquitin specific peptidase 11 (USP11), mRNA [NM_004651]                                     | 8237   |
| A_23_P217596 | 3.8  | 4.2  | -1.7 | 1.2  | USP12 | Homo sapiens ubiquitin specific peptidase 12 (USP12), mRNA [NM_182488]                                     | 219333 |

|              |      |      |      |      |       |                                                                                                                              |       |
|--------------|------|------|------|------|-------|------------------------------------------------------------------------------------------------------------------------------|-------|
| A_24_P313744 | 1.7  | 1.1  | -2.5 | -1.1 | USP14 | Homo sapiens ubiquitin specific peptidase 14 (tRNA-guanine transglycosylase) (USP14), transcript variant 1, mRNA [NM_005151] | 9097  |
| A_23_P325802 | 1.7  | 2.4  | -1.4 | 1.6  | USP15 | Homo sapiens ubiquitin specific peptidase 15 (USP15), transcript variant 3, mRNA [NM_001252079]                              | 9958  |
| A_23_P257911 | -1.0 | -1.4 | -1.0 | -3.2 | USP16 | Homo sapiens ubiquitin specific peptidase 16 (USP16), transcript variant 3, mRNA [NM_001032410]                              | 10600 |

|              |       |      |      |      |       |                                                                                                 |       |
|--------------|-------|------|------|------|-------|-------------------------------------------------------------------------------------------------|-------|
| A_32_P132206 | -1.2  | -1.0 | -1.0 | -3.5 | USP18 | Homo sapiens ubiquitin specific peptidase 18 (USP18), mRNA [NM_017414]                          | 11274 |
| A_23_P113789 | -3.7  | -2.3 | -4.1 | -5.1 | USP19 | Homo sapiens ubiquitin specific peptidase 19 (USP19), transcript variant 4, mRNA [NM_006677]    | 10869 |
| A_24_P107317 | 2.8   | 3.9  | -1.1 | 1.0  | USP2  | Homo sapiens ubiquitin specific peptidase 2 (USP2), transcript variant 1, mRNA [NM_004205]      | 9099  |
| A_24_P139620 | -21.6 | 1.3  | -1.1 | -2.0 | USP21 | Homo sapiens ubiquitin specific peptidase 21 (USP21), transcript variant 3, mRNA [NM_001014443] | 27005 |



|              |      |      |      |      |       |                                                                        |       |
|--------------|------|------|------|------|-------|------------------------------------------------------------------------|-------|
| A_23_P256676 | 1.1  | -1.1 | -3.9 | -1.1 | USP25 | Homo sapiens ubiquitin specific peptidase 25 (USP25), mRNA [NM_013396] | 29761 |
| A_24_P87114  | -7.6 | 1.0  | 1.0  | -3.4 | USP30 | Homo sapiens ubiquitin specific peptidase 30 (USP30), mRNA [NM_032663] | 84749 |
| A_23_P206612 | 2.5  | 2.2  | 2.3  | 2.2  | USP31 | Homo sapiens ubiquitin specific peptidase 31 (USP31), mRNA [NM_020718] | 57478 |
| A_23_P107154 | -1.2 | 3.0  | 1.4  | 2.1  | USP32 | Homo sapiens ubiquitin specific peptidase 32 (USP32), mRNA [NM_032582] | 84669 |

|              |      |      |      |      |       |                                                                                              |       |
|--------------|------|------|------|------|-------|----------------------------------------------------------------------------------------------|-------|
| A_23_P106    | 1.5  | 6.9  | 3.4  | 1.8  | USP33 | Homo sapiens ubiquitin specific peptidase 33 (USP33), transcript variant 1, mRNA [NM_015017] | 23032 |
| A_32_P81173  | -2.1 | -1.4 | 1.2  | -1.4 | USP34 | Homo sapiens mRNA; cDNA DKFZp586J101 (from clone DKFZp586J101). [AL050376]                   | 9736  |
| A_24_P126417 | 1.8  | -1.4 | -1.0 | -2.2 | USP34 | Homo sapiens ubiquitin specific peptidase 34 (USP34), mRNA [NM_014709]                       | 9736  |
| A_24_P410809 | 1.9  | 1.0  | 1.0  | 2.2  | USP34 | Homo sapiens ubiquitin specific peptidase 34 (USP34), mRNA [NM_014709]                       | 9736  |

|              |      |      |      |      |       |                                                                                                  |        |
|--------------|------|------|------|------|-------|--------------------------------------------------------------------------------------------------|--------|
| A_32_P101301 | -2.6 | 1.0  | -2.7 | -2.8 | USP39 | Homo sapiens ubiquitin specific peptidase 39 (USP39), mRNA [NM_006590]                           | 10713  |
| A_23_P58091  | -1.5 | -1.8 | -2.9 | 1.3  | USP4  | ubiquitin specific peptidase 4 (proto-oncogene) [Source:HGNC Symbol;Acc:12627] [ENST00000462673] | 7375   |
| A_32_P54553  | -2.3 | 1.0  | 1.4  | 1.0  | USP41 | ubiquitin specific peptidase 41 [Source:HGNC Symbol;Acc:20070] [ENST00000454608]                 | 373856 |
| A_24_P310009 | -6.8 | 1.1  | -1.0 | -1.0 | USP43 | Homo sapiens ubiquitin specific peptidase 43 (USP43), mRNA [NM_153210]                           | 124739 |

|              |      |      |      |       |       |                                                                                              |       |
|--------------|------|------|------|-------|-------|----------------------------------------------------------------------------------------------|-------|
| A_23_P134008 | -3.3 | 1.0  | -1.9 | -1.1  | USP45 | ubiquitin specific peptidase 45 [Source:HGNC Symbol;Acc:20080] [ENST00000472914]             | 85015 |
| A_23_P81180  | -1.4 | -9.5 | -1.0 | 1.9   | USP46 | Homo sapiens ubiquitin specific peptidase 46 (USP46), transcript variant 1, mRNA [NM_022832] | 64854 |
| A_23_P200551 | 1.0  | -2.1 | -2.9 | -1.4  | USP48 | Homo sapiens ubiquitin specific peptidase 48 (USP48), transcript variant 1, mRNA [NM_032236] | 84196 |
| A_32_P128701 | -1.0 | 2.3  | 1.0  | -10.7 | USP53 | Homo sapiens ubiquitin specific peptidase 53 (USP53), mRNA [NM_019050]                       | 54532 |

|              |      |      |      |      |       |                                                                                              |        |
|--------------|------|------|------|------|-------|----------------------------------------------------------------------------------------------|--------|
| A_24_P914155 | 1.1  | 2.5  | 1.4  | 1.5  | USP54 | Homo sapiens ubiquitin specific peptidase 54 (USP54), mRNA [NM_152586]                       | 159195 |
| A_24_P238040 | 1.7  | 1.7  | 2.3  | 1.4  | USP6  | Homo sapiens ubiquitin specific peptidase 6 (Tre-2 oncogene) (USP6), mRNA [NM_004505]        | 9098   |
| A_23_P128641 | 1.7  | 1.6  | 2.7  | 1.6  | USPL1 | Homo sapiens ubiquitin specific peptidase like 1 (USPL1), mRNA [NM_005800]                   | 10208  |
| A_23_P33141  | -1.4 | -2.2 | -2.3 | -1.5 | UTF1  | Homo sapiens undifferentiated embryonic cell transcription factor 1 (UTF1), mRNA [NM_003577] | 8433   |

|              |      |      |      |      |        |                                                                                                                               |       |
|--------------|------|------|------|------|--------|-------------------------------------------------------------------------------------------------------------------------------|-------|
| A_23_P205216 | 1.7  | 1.3  | 2.3  | 1.1  | UTP14A | Homo sapiens UTP14, U3 small nucleolar ribonucleo protein, homolog A (yeast) (UTP14A), transcript variant 1, mRNA [NM_006649] | 10813 |
| A_24_P201879 | 2.2  | 2.3  | 1.9  | 1.8  | UTP14C | Homo sapiens UTP14, U3 small nucleolar ribonucleo protein, homolog C (yeast) (UTP14C), mRNA [NM_021645]                       | 9724  |
| A_23_P58497  | -1.0 | -1.1 | -2.8 | -1.1 | UTP15  | Homo sapiens UTP15, U3 small nucleolar ribonucleo protein, homolog (S. cerevisiae) (UTP15), mRNA [NM_032175]                  | 84135 |

|              |      |      |      |      |       |                                                                                                         |       |
|--------------|------|------|------|------|-------|---------------------------------------------------------------------------------------------------------|-------|
| A_23_P162525 | -3.0 | -2.7 | 1.5  | 1.9  | UTP20 | Homo sapiens UTP20, small subunit (SSU) processome component, homolog (yeast) (UTP20), mRNA [NM_014503] | 27340 |
| A_32_P208733 | -2.5 | 1.1  | -1.0 | -1.0 | UTP23 | Homo sapiens cDNA FLJ30717 fis, clone FCBBF2001672. [AK055279]                                          | 84294 |
| A_23_P164237 | 3.2  | 2.7  | 2.4  | 4.5  | UTP6  | Homo sapiens UTP6, small subunit (SSU) processome component, homolog (yeast) (UTP6), mRNA [NM_018428]   | 55813 |
| A_23_P214779 | -1.7 | -3.5 | -2.0 | -2.9 | UTRN  | Homo sapiens utrophin (UTRN), mRNA [NM_007124]                                                          | 7402  |

|              |      |      |      |      |       |                                                                                                                             |       |
|--------------|------|------|------|------|-------|-----------------------------------------------------------------------------------------------------------------------------|-------|
| A_23_P146885 | 2.5  | 1.0  | -1.2 | -1.1 | UTS2R | Homo sapiens urotensin 2 receptor (UTS2R), mRNA [NM_018949]                                                                 | 2837  |
| A_23_P329835 | -1.8 | 1.1  | -1.8 | -7.8 | UTY   | Homo sapiens ubiquitously transcribed tetratricopeptide repeat gene, Y-linked (UTY), transcript variant 3, mRNA [NM_007125] | 7404  |
| A_23_P67829  | 1.0  | 1.3  | -2.0 | 1.7  | UXS1  | Homo sapiens UDP-glucuronate decarboxylase 1 (UXS1), mRNA [NM_025076]                                                       | 80146 |
| A_23_P77590  | -2.3 | -1.3 | -1.1 | -1.7 | VAC14 | Homo sapiens Vac14 homolog (S. cerevisiae) (VAC14), mRNA [NM_018052]                                                        | 55697 |



|              |     |     |      |     |       |                                                                                                                      |       |
|--------------|-----|-----|------|-----|-------|----------------------------------------------------------------------------------------------------------------------|-------|
| A_23_P77593  | 3.8 | 3.0 | -1.0 | 3.2 | VAC14 | Homo sapiens Vac14 homolog (S. cerevisiae) (VAC14), mRNA [NM_018052]                                                 | 55697 |
| A_23_P105545 | 2.7 | 3.8 | 4.1  | 1.0 | VAMP1 | Homo sapiens vesicle-associated membrane protein 1 (synaptobrevin 1) (VAMP1), transcript variant 3, mRNA [NM_016830] | 6843  |
| A_24_P942030 | 1.8 | 1.3 | -3.9 | 1.2 | VAMP4 | Homo sapiens vesicle-associated membrane protein 4 (VAMP4), transcript variant 1, mRNA [NM_003762]                   | 8674  |

|              |      |     |      |      |        |                                                                                                    |       |
|--------------|------|-----|------|------|--------|----------------------------------------------------------------------------------------------------|-------|
| A_23_P39840  | -2.1 | 1.0 | -2.7 | -1.1 | VAMP5  | Homo sapiens vesicle-associated membrane protein 5 (myobrevin) (VAMP5), mRNA [NM_006634]           | 10791 |
| A_23_P22671  | 1.9  | 1.9 | 1.7  | 4.6  | VAMP7  | Homo sapiens vesicle-associated membrane protein 7 (VAMP7), transcript variant 1, mRNA [NM_005638] | 6845  |
| A_24_P199655 | 1.1  | 1.1 | 1.1  | -2.3 | VANGL1 | Homo sapiens vang-like 1 (van gogh, Drosophila) (VANGL1), transcript variant 1, mRNA [NM_138959]   | 81839 |

|              |      |       |      |      |        |                                                                                                                                   |       |
|--------------|------|-------|------|------|--------|-----------------------------------------------------------------------------------------------------------------------------------|-------|
| A_23_P369316 | -1.2 | -10.2 | -1.3 | -1.6 | VANGL1 | Homo sapiens vang-like 1 (van gogh, Drosophila ) (VANGL1), transcript variant 1, mRNA [NM_138959]                                 | 81839 |
| A_23_P91293  | 1.8  | 1.9   | 2.0  | -2.1 | VAPB   | Homo sapiens VAMP (vesicle-associated membrane protein)-associated protein B and C (VAPB), transcript variant 1, mRNA [NM_004738] | 9217  |
| A_23_P258714 | 2.9  | -1.0  | -1.1 | 1.5  | VAR5   | Homo sapiens valyl-tRNA synthetase (VAR5), nuclear gene encoding mitochondrial protein, mRNA [NM_006295]                          | 7407  |

|              |     |      |      |      |       |                                                                                                                                                            |       |
|--------------|-----|------|------|------|-------|------------------------------------------------------------------------------------------------------------------------------------------------------------|-------|
| A_23_P324807 | 1.5 | -4.3 | -1.5 | -1.0 | VAR2  | Homo sapiens valyl-tRNA synthetase 2, mitochondrial (putative) (VAR2), nuclear gene encoding mitochondrial protein, transcript variant 2, mRNA [NM_020442] | 57176 |
| A_23_P77000  | 1.6 | 3.7  | -2.0 | 1.1  | VASH1 | Homo sapiens vasohibin 1 (VASH1), mRNA [NM_014909]                                                                                                         | 22846 |
| A_24_P304629 | 2.2 | 2.2  | 3.1  | 1.5  | VASH1 | Homo sapiens vasohibin 1 (VASH1), mRNA [NM_014909]                                                                                                         | 22846 |
| A_24_P85391  | 1.0 | -2.9 | -1.1 | -1.4 | VASH2 | vasohibin 2 [Source:HGNC Symbol;Acc:25723] [ENST00000271776]                                                                                               | 79805 |

|              |      |     |      |      |       |                                                                                                  |       |
|--------------|------|-----|------|------|-------|--------------------------------------------------------------------------------------------------|-------|
| A_23_P115492 | -1.1 | 2.5 | 2.7  | 1.1  | VASH2 | Homo sapiens vasohibin 2 (VASH2), transcript variant 1, mRNA [NM_024749]                         | 79805 |
| A_24_P152527 | 1.3  | 1.3 | -6.6 | -2.6 | VAT1  | Homo sapiens vesicle amine transport protein 1 homolog (T. californica) (VAT1), mRNA [NM_006373] | 10493 |
| A_23_P26954  | -1.1 | 2.4 | -1.5 | -3.0 | VAT1  | Homo sapiens vesicle amine transport protein 1 homolog (T. californica) (VAT1), mRNA [NM_006373] | 10493 |

|              |      |      |      |      |       |                                                                                                        |       |
|--------------|------|------|------|------|-------|--------------------------------------------------------------------------------------------------------|-------|
| A_23_P400449 | -2.3 | 1.0  | 1.0  | 1.0  | VAT1L | Homo sapiens vesicle amine transport protein 1 homolog (T. californica)-like (VAT1L), mRNA [NM_020927] | 57687 |
| A_23_P201551 | -1.3 | -6.9 | -1.3 | 1.3  | VAV3  | Homo sapiens vav 3 guanine nucleotide exchange factor (VAV3), transcript variant 1, mRNA [NM_006113]   | 10451 |
| A_24_P7950   | -1.6 | -2.1 | -1.7 | -1.6 | VAV3  | Homo sapiens vav 3 guanine nucleotide exchange factor (VAV3), transcript variant 1, mRNA [NM_006113]   | 10451 |

|              |      |      |      |     |       |                                                                                                |      |
|--------------|------|------|------|-----|-------|------------------------------------------------------------------------------------------------|------|
| A_23_P256223 | -1.5 | 1.1  | -3.6 | 1.0 | VBP1  | Homo sapiens von Hippel-Lindau binding protein 1 (VBP1), mRNA [NM_003372]                      | 7411 |
| A_23_P34345  | 1.4  | -8.6 | 1.3  | 1.3 | VCAM1 | Homo sapiens vascular cell adhesion molecule 1 (VCAM1), transcript variant 1, mRNA [NM_001078] | 7412 |
| A_23_P202280 | 4.8  | 4.7  | 4.3  | 4.2 | VCL   | Homo sapiens vinculin (VCL), transcript variant 1, mRNA [NM_014000]                            | 7414 |
| A_24_P47182  | 1.1  | 2.2  | 1.0  | 1.1 | VCL   | Homo sapiens vinculin (VCL), transcript variant 1, mRNA [NM_014000]                            | 7414 |

|              |      |      |      |      |       |                                                                                                                                             |       |
|--------------|------|------|------|------|-------|---------------------------------------------------------------------------------------------------------------------------------------------|-------|
| A_24_P230282 | 2.2  | 2.0  | 1.2  | 1.3  | VCX2  | Homo sapiens variable charge, X-linked 2 (VCX2), mRNA [NM_016378]                                                                           | 51480 |
| A_23_P11390  | 2.9  | 1.1  | 1.3  | -1.4 | VCY   | Homo sapiens variable charge, Y-linked (VCY), mRNA [NM_004679]                                                                              | 9084  |
| A_32_P41292  | 1.5  | 1.0  | -2.7 | 1.9  | VDAC2 | Homo sapiens voltage-dependent anion channel 2 (VDAC2), nuclear gene encoding mitochondrial protein, transcript variant 2, mRNA [NM_003375] | 7417  |
| A_23_P60069  | -1.3 | -1.4 | -3.4 | -1.8 | VDAC3 | Homo sapiens voltage-dependent anion channel 3 (VDAC3), transcript variant 1, mRNA [NM_005662]                                              | 7419  |



|             |      |     |      |     |       |                                                                                                           |      |
|-------------|------|-----|------|-----|-------|-----------------------------------------------------------------------------------------------------------|------|
| A_23_P70398 | -1.3 | 1.9 | -3.2 | 1.6 | VEGFA | Homo sapiens vascular endothelial growth factor A (VEGFA), transcript variant 6, mRNA [NM_001025370]      | 7422 |
| A_23_P1594  | 4.0  | 3.5 | 3.3  | 1.5 | VEGFB | Homo sapiens vascular endothelial growth factor B (VEGFB), transcript variant VEGFB-186, mRNA [NM_003377] | 7423 |
| A_24_P55971 | 1.5  | 2.5 | 1.6  | 1.2 | VEGFB | Homo sapiens vascular endothelial growth factor B (VEGFB), transcript variant VEGFB-186, mRNA [NM_003377] | 7423 |

|              |      |      |      |      |       |                                                                                                                         |       |
|--------------|------|------|------|------|-------|-------------------------------------------------------------------------------------------------------------------------|-------|
| A_23_P167096 | 1.1  | 2.1  | 2.0  | 1.3  | VEGFC | Homo sapiens vascular endothelial growth factor C (VEGFC), mRNA [NM_005429]                                             | 7424  |
| A_23_P419150 | 6.2  | 25.8 | 24.3 | 23.2 | VENTX | Homo sapiens VENT homeobox (VENTX), mRNA [NM_014468]                                                                    | 27287 |
| A_23_P380208 | -5.4 | -1.8 | -3.3 | -1.8 | VEPH1 | Homo sapiens ventricular zone expressed PH domain homolog 1 (zebrafish) (VEPH1), transcript variant 1, mRNA [NM_024621] | 79674 |
| A_24_P129326 | 7.9  | 5.4  | 4.5  | 5.0  | VEGF  | Homo sapiens VGF nerve growth factor inducible (VEGF), mRNA [NM_003378]                                                 | 7425  |

|              |      |      |      |      |       |                                                                                            |        |
|--------------|------|------|------|------|-------|--------------------------------------------------------------------------------------------|--------|
| A_23_P253123 | 1.2  | -1.2 | -4.5 | -3.8 | VGLL1 | Homo sapiens vestigial like 1 (Drosophila) (VGLL1), mRNA [NM_016267]                       | 51442  |
| A_32_P106376 | -2.0 | 1.4  | 1.0  | -1.6 | VGLL2 | Homo sapiens vestigial like 2 (Drosophila) (VGLL2), transcript variant 1, mRNA [NM_182645] | 245806 |
| A_32_P459849 | 2.2  | 2.7  | 1.1  | -1.3 | VGLL2 | Homo sapiens vestigial like 2 (Drosophila) (VGLL2), transcript variant 2, mRNA [NM_153453] | 245806 |
| A_24_P67585  | 1.1  | -3.4 | -1.4 | -1.4 | VGLL3 | Homo sapiens vestigial like 3 (Drosophila) (VGLL3), mRNA [NM_016206]                       | 389136 |

|              |      |      |      |      |       |                                                                                               |        |
|--------------|------|------|------|------|-------|-----------------------------------------------------------------------------------------------|--------|
| A_23_P132595 | -5.4 | 1.1  | 1.1  | 1.3  | VGLL4 | Homo sapiens vestigial like 4 (Drosophila) (VGLL4), transcript variant 2, mRNA [NM_014667]    | 9686   |
| A_23_P132611 | 1.7  | 1.2  | 3.4  | 1.6  | VHL   | Homo sapiens von Hippel-Lindau tumor suppressor (VHL), transcript variant 1, mRNA [NM_000551] | 7428   |
| A_23_P63096  | 1.1  | -9.9 | -1.0 | -2.5 | VHLL  | Homo sapiens von Hippel-Lindau tumor suppressor-like (VHLL), mRNA [NM_001004319]              | 391104 |
| A_23_P161190 | 2.3  | 1.0  | 2.5  | 1.0  | VIM   | Homo sapiens vimentin (VIM), mRNA [NM_003380]                                                 | 7431   |

|              |      |      |      |      |          |                                                                                                         |        |
|--------------|------|------|------|------|----------|---------------------------------------------------------------------------------------------------------|--------|
| A_23_P161194 | -2.5 | -1.3 | -2.5 | -1.7 | VIM      | Homo sapiens vimentin (VIM), mRNA [NM_003380]                                                           | 7431   |
| A_23_P145978 | -1.1 | -1.0 | -1.0 | -2.6 | VIPR2    | Homo sapiens vasoactive intestinal peptide receptor 2 (VIPR2), mRNA [NM_003382]                         | 7434   |
| A_23_P413815 | -1.8 | -1.8 | -2.6 | -3.2 | VKORC1L1 | Homo sapiens vitamin K epoxide reductase complex, subunit 1-like 1 (VKORC1L1), mRNA [NM_173517]         | 154807 |
| A_32_P151621 | 2.1  | 1.0  | 1.0  | -1.0 | VMA21    | Homo sapiens VMA21 vacuolar H <sup>+</sup> -ATPase homolog (S. cerevisiae) (VMA21), mRNA [NM_001017980] | 203547 |

|              |      |      |       |      |       |                                                                                                                   |        |
|--------------|------|------|-------|------|-------|-------------------------------------------------------------------------------------------------------------------|--------|
| A_32_P9753   | -1.5 | 1.4  | -3.9  | -3.7 | VMP1  | Homo sapiens transmembrane protein 49, mRNA (cDNA clone IMAGE:4295896), with apparent retained intron. [BC024020] | 81671  |
| A_23_P303238 | -1.2 | 1.1  | -2.3  | 1.3  | VN1R5 | Homo sapiens vomeronasal 1 receptor 5 (gene/pseudogene) (VN1R5), mRNA [NM_173858]                                 | 317705 |
| A_24_P337700 | 1.8  | -1.2 | -1.0  | -4.4 | VNN1  | Homo sapiens vanin 1 (VNN1), mRNA [NM_004666]                                                                     | 8876   |
| A_23_P255345 | 1.0  | -1.0 | -21.4 | -1.1 | VNN1  | Homo sapiens vanin 1 (VNN1), mRNA [NM_004666]                                                                     | 8876   |

|              |      |      |      |      |        |                                                                                                       |       |
|--------------|------|------|------|------|--------|-------------------------------------------------------------------------------------------------------|-------|
| A_23_P122724 | -1.6 | -2.7 | 1.2  | -3.3 | VNN2   | Homo sapiens vanin 2 (VNN2), transcript variant 1, mRNA [NM_004665]                                   | 8875  |
| A_24_P26170  | 2.1  | -1.1 | -1.6 | -7.1 | VPRBP  | Homo sapiens Vpr (HIV-1) binding protein (VPRBP), transcript variant 1, mRNA [NM_014703]              | 9730  |
| A_23_P166371 | 2.3  | 5.5  | 1.8  | 4.8  | VPREB3 | Homo sapiens pre-B lymphocyte 3 (VPREB3), mRNA [NM_013378]                                            | 29802 |
| A_32_P232523 | -4.3 | 1.3  | -1.3 | 1.0  | VPS13A | vacuolar protein sorting 13 homolog A (S. cerevisiae) [Source:HGNC Symbol;Acc:1908] [ENST00000471439] | 23230 |

|              |      |      |      |      |        |                                                                                                                     |        |
|--------------|------|------|------|------|--------|---------------------------------------------------------------------------------------------------------------------|--------|
| A_24_P98251  | -2.7 | 1.0  | -1.0 | 1.0  | VPS13B | Homo sapiens vacuolar protein sorting 13 homolog B (yeast) (VPS13B), transcript variant 5, mRNA [NM_017890]         | 157680 |
| A_23_P82975  | 1.0  | -2.5 | -1.6 | -1.3 | VPS13B | Homo sapiens vacuolar protein sorting 13 homolog B (yeast) (VPS13B), transcript variant 4, mRNA [NM_181661]         | 157680 |
| A_23_P364837 | -2.3 | -1.0 | -3.5 | -2.2 | VPS13D | Homo sapiens vacuolar protein sorting 13 homolog D (S. cerevisiae) (VPS13D), transcript variant 1, mRNA [NM_015378] | 55187  |



|             |      |      |      |      |        |                                                                                                                |        |
|-------------|------|------|------|------|--------|----------------------------------------------------------------------------------------------------------------|--------|
| A_24_P18802 | 2.7  | 1.3  | -1.5 | 1.3  | VPS18  | Homo sapiens vacuolar protein sorting 18 homolog (S. cerevisiae) (VPS18), mRNA [NM_020857]                     | 57617  |
| A_23_P75255 | -1.0 | -5.6 | -1.0 | -1.0 | VPS26A | Homo sapiens vacuolar protein sorting 26 homolog A (S. pombe) (VPS26A), transcript variant 1, mRNA [NM_004896] | 9559   |
| A_23_P52903 | -1.2 | 2.7  | 1.1  | -1.1 | VPS26B | Homo sapiens vacuolar protein sorting 26 homolog B (S. pombe) (VPS26B), mRNA [NM_052875]                       | 112936 |

|              |      |      |      |      |        |                                                                                                                  |        |
|--------------|------|------|------|------|--------|------------------------------------------------------------------------------------------------------------------|--------|
| A_23_P203323 | 5.9  | 4.3  | 4.0  | -1.1 | VPS26B | Homo sapiens vacuolar protein sorting 26 homolog B (S. pombe) (VPS26B), mRNA [NM_052875]                         | 112936 |
| A_23_P128384 | -2.1 | -1.0 | -1.4 | -1.1 | VPS29  | Homo sapiens vacuolar protein sorting 29 homolog (S. cerevisiae) (VPS29), transcript variant 1, mRNA [NM_016226] | 51699  |
| A_24_P175989 | -2.9 | -4.3 | -4.0 | 1.0  | VPS29  | Homo sapiens vacuolar protein sorting 29 homolog (S. cerevisiae) (VPS29), transcript variant 1, mRNA [NM_016226] | 51699  |

|              |     |      |      |      |        |                                                                                                                     |        |
|--------------|-----|------|------|------|--------|---------------------------------------------------------------------------------------------------------------------|--------|
| A_23_P48964  | 1.1 | 2.3  | 1.5  | -1.5 | VPS33B | Homo sapiens vacuolar protein sorting 33 homolog B (yeast) (VPS33B), mRNA [NM_018668]                               | 26276  |
| A_24_P941649 | 1.1 | -2.6 | -1.0 | -1.0 | VPS37A | Homo sapiens vacuolar protein sorting 37 homolog A (S. cerevisiae) (VPS37A), transcript variant 1, mRNA [NM_152415] | 137492 |
| A_23_P150876 | 1.0 | -1.0 | -1.1 | -5.6 | VPS37B | Homo sapiens vacuolar protein sorting 37 homolog B (S. cerevisiae) (VPS37B), mRNA [NM_024667]                       | 79720  |

|              |      |      |      |      |        |                                                                                                  |        |
|--------------|------|------|------|------|--------|--------------------------------------------------------------------------------------------------|--------|
| A_23_P409417 | 1.2  | 1.5  | 2.0  | -1.5 | VPS37D | Homo sapiens vacuolar protein sorting 37 homolog D (S. cerevisiae) (VPS37D), mRNA [NM_001077621] | 155382 |
| A_23_P23719  | 2.6  | 1.8  | 4.3  | 2.0  | VPS45  | Homo sapiens vacuolar protein sorting 45 homolog (S. cerevisiae) (VPS45), mRNA [NM_007259]       | 11311  |
| A_24_P362394 | -2.1 | -1.8 | -2.4 | -1.4 | VPS45  | Homo sapiens vacuolar protein sorting 45 homolog (S. cerevisiae) (VPS45), mRNA [NM_007259]       | 11311  |

|              |      |      |      |     |       |                                                                                                                     |       |
|--------------|------|------|------|-----|-------|---------------------------------------------------------------------------------------------------------------------|-------|
| A_24_P147398 | 3.4  | 3.5  | 3.4  | 3.4 | VPS53 | Homo sapiens vacuolar protein sorting 53 homolog (S. cerevisiae) (VPS53), transcript variant 2, mRNA [NM_018289]    | 55275 |
| A_24_P279489 | 1.0  | -2.5 | -1.0 | 1.0 | VPS53 | Homo sapiens vacuolar protein sorting 53 homolog (S. cerevisiae) (VPS53), transcript variant 1, mRNA [NM_001128159] | 55275 |
| A_24_P357709 | -1.0 | -2.6 | -1.0 | 1.4 | VPS8  | Homo sapiens vacuolar protein sorting 8 homolog (S. cerevisiae) (VPS8), transcript variant 1, mRNA [NM_001009921]   | 23355 |

|              |      |       |      |      |       |                                                                                                                   |        |
|--------------|------|-------|------|------|-------|-------------------------------------------------------------------------------------------------------------------|--------|
| A_23_P431587 | -1.0 | -1.0  | -1.1 | -2.6 | VPS8  | Homo sapiens vacuolar protein sorting 8 homolog (S. cerevisiae) (VPS8), transcript variant 1, mRNA [NM_001009921] | 23355  |
| A_23_P107933 | 1.3  | -12.3 | -5.1 | -1.1 | VRK3  | Homo sapiens vaccinia related kinase 3 (VRK3), transcript variant 1, mRNA [NM_016440]                             | 51231  |
| A_32_P163147 | 1.9  | 1.1   | 1.6  | 2.2  | VSIG1 | Homo sapiens V-set and immunoglobulin domain containing 1 (VSIG1), transcript variant 2, mRNA [NM_182607]         | 340547 |

|              |      |      |      |      |         |                                                                                                |        |
|--------------|------|------|------|------|---------|------------------------------------------------------------------------------------------------|--------|
| A_24_P914000 | 4.5  | -1.6 | -3.6 | -3.0 | VSIG10  | Homo sapiens hypothetical protein FLJ20674, mRNA (cDNA clone IMAGE:3138594). [BC001437]        | 54621  |
| A_23_P72059  | -1.0 | 2.5  | 2.4  | 1.9  | VSIG10  | Homo sapiens V-set and immunoglobulin domain containing 10 (VSIG10), mRNA [NM_019086]          | 54621  |
| A_23_P101246 | -2.2 | -3.4 | -2.9 | -1.2 | VSIG10L | Homo sapiens V-set and immunoglobulin domain containing 10 like (VSIG10L), mRNA [NM_001163922] | 147645 |

|              |      |     |      |     |         |                                                                                                           |        |
|--------------|------|-----|------|-----|---------|-----------------------------------------------------------------------------------------------------------|--------|
| A_23_P101240 | 3.3  | 3.5 | 3.4  | 2.0 | VSIG10L | Homo sapiens V-set and immunoglobulin domain containing 10 like (VSIG10L), mRNA [NM_001163922]            | 147645 |
| A_23_P217269 | -6.1 | 1.6 | -2.1 | 1.2 | VSIG4   | Homo sapiens V-set and immunoglobulin domain containing 4 (VSIG4), transcript variant 1, mRNA [NM_007268] | 11326  |
| A_23_P142201 | 2.8  | 4.4 | 2.6  | 2.4 | VSTM2B  | Homo sapiens V-set and transmembrane domain containing 2B (VSTM2B), mRNA [NM_001146339]                   | 342865 |



|              |      |      |      |      |        |                                                                                                             |        |
|--------------|------|------|------|------|--------|-------------------------------------------------------------------------------------------------------------|--------|
| A_23_P79803  | -1.0 | -1.1 | -4.6 | -1.1 | VSTM2L | Homo sapiens V-set and transmembrane domain containing 2 like (VSTM2L), mRNA [NM_080607]                    | 128434 |
| A_24_P941038 | 10.8 | 10.9 | 10.3 | 7.3  | VSTM4  | Homo sapiens V-set and transmembrane domain containing 4 (VSTM4), transcript variant 1, mRNA [NM_001031746] | 196740 |
| A_23_P131990 | 2.1  | 1.7  | 1.5  | -1.0 | VSX1   | Homo sapiens visual system homeobox 1 (VSX1), transcript variant 1, mRNA [NM_014588]                        | 30813  |
| A_23_P78099  | -1.1 | 3.7  | 1.5  | 2.6  | VTN    | Homo sapiens vitronectin (VTN), mRNA [NM_000638]                                                            | 7448   |

|              |      |      |      |      |       |                                                                                                         |        |
|--------------|------|------|------|------|-------|---------------------------------------------------------------------------------------------------------|--------|
| A_23_P86089  | -1.7 | -6.8 | -2.3 | -2.7 | VWA1  | Homo sapiens von Willebrand factor A domain containing 1 (VWA1), transcript variant 1, mRNA [NM_022834] | 64856  |
| A_24_P122746 | 3.9  | 2.2  | 2.1  | 2.3  | VWA1  | Homo sapiens von Willebrand factor A domain containing 1 (VWA1), transcript variant 1, mRNA [NM_022834] | 64856  |
| A_23_P390665 | 2.2  | 2.2  | 1.3  | 2.3  | VWA3A | Homo sapiens von Willebrand factor A domain containing 3A (VWA3A), mRNA [NM_173615]                     | 146177 |

|             |       |      |      |      |       |                                                                                                           |        |
|-------------|-------|------|------|------|-------|-----------------------------------------------------------------------------------------------------------|--------|
| A_32_P46603 | 1.3   | -2.4 | 1.3  | -1.7 | VWA3B | Homo sapiens von Willebrand factor A domain containing 3B (VWA3B), mRNA [NM_144992]                       | 200403 |
| A_23_P98455 | 2.0   | 2.0  | 1.8  | 1.9  | VWA5A | Homo sapiens von Willebrand factor A domain containing 5A (VWA5A), transcript variant 1, mRNA [NM_014622] | 4013   |
| A_24_P75460 | -15.1 | -1.0 | -1.1 | -1.1 | VWC2L | Homo sapiens von Willebrand factor C domain containing protein 2-like (VWC2L), mRNA [NM_001080500]        | 402117 |

|              |      |      |      |      |      |                                                                                                          |        |
|--------------|------|------|------|------|------|----------------------------------------------------------------------------------------------------------|--------|
| A_32_P148745 | 1.4  | 1.4  | 2.3  | -2.2 | VWDE | Homo sapiens von Willebrand factor D and EGF domains (VWDE), mRNA [NM_001135924]                         | 221806 |
| A_23_P381505 | 1.1  | -3.6 | 1.1  | 1.1  | VWDE | Homo sapiens von Willebrand factor D and EGF domains (VWDE), mRNA [NM_001135924]                         | 221806 |
| A_23_P201996 | -2.4 | -1.0 | -3.4 | -2.8 | WAC  | Homo sapiens WW domain containing adaptor with coiled-coil (WAC), transcript variant 1, mRNA [NM_016628] | 51322  |
| A_23_P65651  | 1.6  | 1.3  | 2.2  | 1.1  | WARS | Homo sapiens tryptophanyl-tRNA synthetase (WARS), transcript variant 1, mRNA [NM_004184]                 | 7453   |

|              |      |      |      |      |       |                                                                                           |       |
|--------------|------|------|------|------|-------|-------------------------------------------------------------------------------------------|-------|
| A_23_P96331  | 1.0  | 1.5  | 3.2  | 1.8  | WAS   | Homo sapiens Wiskott-Aldrich syndrome (eczema-thrombocytopenia) (WAS), mRNA [NM_000377]   | 7454  |
| A_23_P168306 | 1.2  | 1.3  | 1.4  | -3.2 | WASF1 | Homo sapiens WAS protein family, member 1 (WASF1), transcript variant 1, mRNA [NM_003931] | 8936  |
| A_24_P76546  | 1.1  | 1.6  | 2.0  | 1.1  | WASF2 | Homo sapiens WAS protein family, member 2 (WASF2), transcript variant 1, mRNA [NM_006990] | 10163 |
| A_32_P41461  | -3.6 | -1.6 | -3.6 | -3.7 | WASF2 | Homo sapiens WAS protein family, member 2 (WASF2), transcript variant 1, mRNA [NM_006990] | 10163 |

|              |      |      |      |       |       |                                                                     |           |
|--------------|------|------|------|-------|-------|---------------------------------------------------------------------|-----------|
| A_23_P325339 | 1.1  | 1.2  | -1.3 | -2.4  | WASH1 | Homo sapiens mRNA for FLJ00038 protein, partial cds. [AK024448]     | 100287171 |
| A_24_P24831  | 1.7  | 2.0  | 2.3  | -10.9 | WASH1 | Homo sapiens WAS protein family homolog 1 (WASH1), mRNA [NM_182905] | 100287171 |
| A_24_P41291  | 1.1  | 1.5  | 2.2  | -1.5  | WASH1 | Homo sapiens WAS protein family homolog 1 (WASH1), mRNA [NM_182905] | 100287171 |
| A_23_P11744  | -1.8 | -4.6 | -1.2 | -2.5  | WASH1 | Homo sapiens WAS protein family homolog 1 (WASH1), mRNA [NM_182905] | 100287171 |

|              |      |      |      |      |        |                                                                                           |        |
|--------------|------|------|------|------|--------|-------------------------------------------------------------------------------------------|--------|
| A_23_P11742  | 2.5  | 1.3  | 1.3  | 3.4  | WASH2P | Homo sapiens WAS protein family homolog 2 pseudogene (WASH2P), non-coding RNA [NR_024077] | 375260 |
| A_32_P228601 | 2.3  | -1.5 | 1.4  | 1.5  | WASH7P | Homo sapiens cDNA, FLJ17181. [AK310139]                                                   | 653635 |
| A_23_P252808 | -1.8 | -1.5 | -1.2 | -2.9 | WBP1   | Homo sapiens WW domain binding protein 1 (WBP1), mRNA [NM_012477]                         | 23559  |
| A_23_P410128 | 2.2  | 1.9  | 1.2  | 1.5  | WBP2NL | Homo sapiens WBP2 N-terminal like (WBP2NL), mRNA [NM_152613]                              | 164684 |

|              |     |      |      |     |         |                                                                                                |        |
|--------------|-----|------|------|-----|---------|------------------------------------------------------------------------------------------------|--------|
| A_24_P370420 | 1.4 | 2.7  | 2.7  | 5.7 | WBSCR16 | Homo sapiens Williams-Beuren syndrome chromosome region 16 (WBSCR16), mRNA [NM_030798]         | 81554  |
| A_23_P111517 | 2.1 | -8.5 | -1.1 | 1.3 | WBSCR17 | Homo sapiens Williams-Beuren syndrome chromosome region 17 (WBSCR17), mRNA [NM_022479]         | 64409  |
| A_32_P220826 | 4.2 | 3.9  | 3.4  | 1.0 | WBSCR22 | Williams Beuren syndrome chromosome region 22 [Source:HGNC Symbol;Acc:16405] [ENST00000423166] | 114049 |



|              |      |      |      |     |       |                                                                                |       |
|--------------|------|------|------|-----|-------|--------------------------------------------------------------------------------|-------|
| A_32_P10396  | 1.9  | 2.5  | 2.5  | 2.1 | WDFY3 | Homo sapiens WD repeat and FYVE domain containing 3 (WDFY3), mRNA [NM_014991]  | 23001 |
| A_32_P30905  | 2.1  | -1.0 | 1.6  | 1.4 | WDFY4 | Homo sapiens WDFY family member 4 (WDFY4), mRNA [NM_020945]                    | 57705 |
| A_23_P502913 | -2.3 | 1.8  | -1.8 | 1.1 | WDR1  | Homo sapiens WD repeat domain 1 (WDR1), transcript variant 1, mRNA [NM_017491] | 9948  |
| A_23_P213000 | -8.1 | 1.0  | 1.0  | 1.5 | WDR1  | Homo sapiens WD repeat domain 1 (WDR1), transcript variant 1, mRNA [NM_017491] | 9948  |

|              |      |      |      |       |       |                                                                                           |       |
|--------------|------|------|------|-------|-------|-------------------------------------------------------------------------------------------|-------|
| A_24_P394361 | -2.1 | -9.5 | -2.1 | -2.1  | WDR19 | Homo sapiens<br>WD repeat domain 19 (WDR19), mRNA<br>[NM_025132]                          | 57728 |
| A_23_P110135 | 1.3  | -6.9 | 1.2  | 1.0   | WDR19 | Homo sapiens<br>WD repeat domain 19 (WDR19), mRNA<br>[NM_025132]                          | 57728 |
| A_23_P205255 | 3.4  | 3.9  | 3.2  | -6.3  | WDR20 | Homo sapiens<br>WD repeat domain 20 (WDR20), transcript variant 7, mRNA<br>[NM_001242417] | 91833 |
| A_23_P26476  | 1.3  | 1.3  | -1.5 | -14.5 | WDR24 | Homo sapiens<br>WD repeat domain 24 (WDR24), mRNA<br>[NM_032259]                          | 84219 |

|              |      |      |      |      |       |                                                                                  |        |
|--------------|------|------|------|------|-------|----------------------------------------------------------------------------------|--------|
| A_23_P159071 | -1.9 | -1.1 | 1.2  | -2.0 | WDR25 | Homo sapiens WD repeat domain 25 (WDR25), transcript variant 1, mRNA [NM_024515] | 79446  |
| A_24_P36868  | 1.1  | -9.5 | -1.3 | 1.1  | WDR26 | Homo sapiens WD repeat domain 26 (WDR26), transcript variant 1, mRNA [NM_025160] | 80232  |
| A_32_P415151 | -1.0 | -1.0 | -4.1 | -1.1 | WDR27 | Homo sapiens WD repeat domain 27 (WDR27), transcript variant 1, mRNA [NM_182552] | 253769 |
| A_23_P23318  | 1.9  | 1.8  | 1.7  | 2.2  | WDR3  | Homo sapiens WD repeat domain 3 (WDR3), mRNA [NM_006784]                         | 10885  |

|              |      |      |      |     |       |                                                                                     |        |
|--------------|------|------|------|-----|-------|-------------------------------------------------------------------------------------|--------|
| A_24_P102920 | -4.5 | 1.1  | 1.1  | 1.1 | WDR33 | Homo sapiens WD repeat domain 33 (WDR33), transcript variant 2, mRNA [NM_001006622] | 55339  |
| A_23_P20823  | 1.3  | -2.8 | -3.8 | 1.4 | WDR34 | Homo sapiens WD repeat domain 34 (WDR34), mRNA [NM_052844]                          | 89891  |
| A_23_P110598 | -1.1 | -1.1 | -1.1 | 2.7 | WDR36 | Homo sapiens WD repeat domain 36 (WDR36), mRNA [NM_139281]                          | 134430 |
| A_23_P211302 | 1.0  | 1.0  | 1.8  | 5.7 | WDR4  | Homo sapiens WD repeat domain 4 (WDR4), transcript variant 2, mRNA [NM_033661]      | 10785  |

|              |      |      |      |      |       |                                                                                     |       |
|--------------|------|------|------|------|-------|-------------------------------------------------------------------------------------|-------|
| A_23_P23748  | -2.4 | 1.0  | -1.0 | 1.1  | WDR47 | Homo sapiens WD repeat domain 47 (WDR47), transcript variant 2, mRNA [NM_014969]    | 22911 |
| A_23_P80409  | -1.1 | -1.2 | -1.3 | -2.9 | WDR48 | Homo sapiens WD repeat domain 48 (WDR48), mRNA [NM_020839]                          | 57599 |
| A_23_P32558  | -1.3 | -1.4 | -5.8 | -1.4 | WDR5  | Homo sapiens WD repeat domain 5 (WDR5), transcript variant 1, mRNA [NM_017588]      | 11091 |
| A_23_P110090 | -1.2 | 1.8  | -1.0 | 2.7  | WDR52 | Homo sapiens WD repeat domain 52 (WDR52), transcript variant 1, mRNA [NM_001164496] | 55779 |

|              |      |     |      |     |       |                                                                                        |        |
|--------------|------|-----|------|-----|-------|----------------------------------------------------------------------------------------|--------|
| A_23_P68072  | -2.7 | 2.0 | 2.8  | 2.4 | WDR54 | Homo sapiens<br>WD repeat domain 54 (WDR54), mRNA<br>[NM_032118]                       | 84058  |
| A_24_P200549 | 3.2  | 2.3 | 2.6  | 2.0 | WDR55 | Homo sapiens<br>WD repeat domain 55 (WDR55), mRNA<br>[NM_017706]                       | 54853  |
| A_23_P339705 | -1.7 | 3.0 | -1.4 | 1.4 | WDR62 | Homo sapiens<br>WD repeat domain 62 (WDR62), transcript variant 2, mRNA<br>[NM_173636] | 284403 |
| A_23_P399116 | -2.1 | 1.5 | 2.0  | 1.0 | WDR64 | Homo sapiens<br>WD repeat domain 64 (WDR64), mRNA<br>[NM_144625]                       | 128025 |

|              |      |       |      |      |       |                                                                                           |        |
|--------------|------|-------|------|------|-------|-------------------------------------------------------------------------------------------|--------|
| A_23_P11980  | -1.0 | -1.0  | -1.1 | -2.9 | WDR65 | Homo sapiens<br>WD repeat domain 65 (WDR65), transcript variant 5, mRNA<br>[NM_001195831] | 149465 |
| A_23_P363275 | 1.1  | -7.4  | -1.1 | 1.2  | WDR66 | Homo sapiens<br>WD repeat domain 66 (WDR66), transcript variant 1, mRNA<br>[NM_144668]    | 144406 |
| A_23_P354208 | -1.1 | -2.9  | -2.4 | -1.5 | WDR81 | Homo sapiens<br>WD repeat domain 81 (WDR81), transcript variant 2, mRNA<br>[NM_152348]    | 124997 |
| A_24_P388536 | 1.1  | -14.4 | 1.0  | 1.1  | WDR82 | Homo sapiens<br>WD repeat domain 82 (WDR82), mRNA<br>[NM_025222]                          | 80335  |

|              |     |      |      |      |       |                                                                                           |        |
|--------------|-----|------|------|------|-------|-------------------------------------------------------------------------------------------|--------|
| A_23_P39024  | 2.1 | 1.1  | 1.0  | 1.1  | WDR83 | Homo sapiens<br>WD repeat domain 83 (WDR83), transcript variant 2, mRNA<br>[NM_032332]    | 84292  |
| A_23_P406957 | 5.3 | 1.0  | 3.7  | 1.7  | WDR85 | Homo sapiens<br>WD repeat domain 85 (WDR85), mRNA<br>[NM_138778]                          | 92715  |
| A_23_P163047 | 2.1 | -1.3 | -2.0 | 1.2  | WDR89 | Homo sapiens<br>WD repeat domain 89 (WDR89), transcript variant 1, mRNA<br>[NM_001008726] | 112840 |
| A_24_P275723 | 1.3 | -1.1 | -1.0 | -2.3 | WDR90 | WD repeat domain 90<br>[Source:HGNC Symbol;Acc:26960]<br>[ENST00000546516]                | 197335 |



|              |     |      |      |      |       |                                                                                     |        |
|--------------|-----|------|------|------|-------|-------------------------------------------------------------------------------------|--------|
| A_23_P411833 | 1.3 | -2.3 | -2.1 | -2.4 | WDR90 | Homo sapiens WD repeat domain 90 (WDR90), mRNA [NM_145294]                          | 197335 |
| A_24_P102895 | 1.8 | 2.3  | -1.9 | 1.5  | WDTC1 | Homo sapiens WD and tetratricopeptide repeats 1 (WDTC1), mRNA [NM_015023]           | 23038  |
| A_23_P86054  | 3.7 | -2.3 | 1.9  | 3.3  | WDTC1 | Homo sapiens WD and tetratricopeptide repeats 1 (WDTC1), mRNA [NM_015023]           | 23038  |
| A_23_P127926 | 1.5 | -2.7 | 1.3  | -1.0 | WEE1  | Homo sapiens WEE1 homolog (S. pombe) (WEE1), transcript variant 1, mRNA [NM_003390] | 7465   |

|              |      |      |      |      |         |                                                                                                   |        |
|--------------|------|------|------|------|---------|---------------------------------------------------------------------------------------------------|--------|
| A_23_P368847 | -1.0 | -3.5 | -1.3 | -3.1 | WFDC10A | Homo sapiens WAP four-disulfide core domain 10A (WFDC10A), mRNA [NM_080753]                       | 140832 |
| A_32_P951    | 4.1  | 1.2  | -1.0 | -1.0 | WFDC10B | Homo sapiens WAP four-disulfide core domain 10B (WFDC10B), transcript variant 1, mRNA [NM_172006] | 280664 |
| A_23_P68436  | 1.6  | 1.1  | -1.0 | -5.7 | WFDC12  | Homo sapiens WAP four-disulfide core domain 12 (WFDC12), mRNA [NM_080869]                         | 128488 |
| A_24_P250507 | -4.1 | -5.5 | -1.6 | 1.1  | WFDC13  | Homo sapiens WAP four-disulfide core domain 13 (WFDC13), mRNA [NM_172005]                         | 164237 |

|              |      |      |      |      |       |                                                                                               |        |
|--------------|------|------|------|------|-------|-----------------------------------------------------------------------------------------------|--------|
| A_23_P218675 | 1.9  | 2.4  | 3.5  | 1.4  | WFDC2 | Homo sapiens WAP four-disulfide core domain 2 (WFDC2), mRNA [NM_006103]                       | 10406  |
| A_23_P218669 | -3.2 | -2.3 | -2.1 | -2.6 | WFDC5 | Homo sapiens WAP four-disulfide core domain 5 (WFDC5), mRNA [NM_145652]                       | 149708 |
| A_23_P102634 | -1.1 | 2.5  | -1.3 | -1.5 | WFDC6 | Homo sapiens WAP four-disulfide core domain 6 (WFDC6), mRNA [NM_080827]                       | 140870 |
| A_32_P873201 | -1.8 | -1.1 | -2.4 | -1.1 | WFDC8 | Homo sapiens WAP four-disulfide core domain 8 (WFDC8), transcript variant a, mRNA [NM_130896] | 90199  |

|              |      |     |      |     |         |                                                                                                                        |        |
|--------------|------|-----|------|-----|---------|------------------------------------------------------------------------------------------------------------------------|--------|
| A_24_P399230 | 1.2  | 2.2 | -1.3 | 1.2 | WFIKKN2 | Homo sapiens WAP, follistatin/kazal, immunoglobulin, kunitz and netrin domain containing 2 (WFIKKN2), mRNA [NM_175575] | 124857 |
| A_23_P389919 | 2.2  | 1.0 | 1.0  | 1.0 | WHSC1   | Homo sapiens Wolf-Hirschhorn syndrome candidate 1 (WHSC1), transcript variant 1, mRNA [NM_133330]                      | 7468   |
| A_23_P216132 | -1.1 | 1.6 | 2.9  | 3.2 | WHSC1L1 | Homo sapiens Wolf-Hirschhorn syndrome candidate 1-like 1 (WHSC1L1), transcript variant short, mRNA [NM_017778]         | 54904  |

|              |      |      |      |     |       |                                                                                                         |       |
|--------------|------|------|------|-----|-------|---------------------------------------------------------------------------------------------------------|-------|
| A_24_P83183  | 1.5  | 1.5  | -2.4 | 1.4 | WHSC2 | Homo sapiens Wolf-Hirschhorn syndrome candidate 2 (WHSC2), mRNA [NM_005663]                             | 7469  |
| A_23_P213216 | 2.4  | -1.4 | -1.1 | 2.8 | WHSC2 | Homo sapiens Wolf-Hirschhorn syndrome candidate 2 (WHSC2), mRNA [NM_005663]                             | 7469  |
| A_24_P917612 | -1.5 | -1.0 | -1.0 | 4.4 | WIBG  | Homo sapiens within bgcn homolog (Drosophila), mRNA (cDNA clone IMAGE:3897762), partial cds. [BC009627] | 84305 |

|              |      |      |       |      |       |                                                                                                                |        |
|--------------|------|------|-------|------|-------|----------------------------------------------------------------------------------------------------------------|--------|
| A_23_P330616 | -1.1 | -2.0 | 1.1   | -2.6 | WIPF1 | Homo sapiens WAS/WAS L interacting protein family, member 1 (WIPF1), transcript variant 2, mRNA [NM_001077269] | 7456   |
| A_23_P330611 | 1.1  | 1.1  | -12.1 | 1.0  | WIPF1 | Homo sapiens WAS/WAS L interacting protein family, member 1 (WIPF1), transcript variant 2, mRNA [NM_001077269] | 7456   |
| A_23_P366455 | 3.7  | 3.5  | 3.3   | 3.5  | WIPF2 | Homo sapiens WAS/WAS L interacting protein family, member 2 (WIPF2), mRNA [NM_133264]                          | 147179 |

|              |       |      |      |      |       |                                                                                                               |        |
|--------------|-------|------|------|------|-------|---------------------------------------------------------------------------------------------------------------|--------|
| A_24_P838748 | 12.8  | 11.9 | 4.0  | 5.4  | WIPF2 | WAS/WASL interacting protein family, member 2 [Source:HGNC Symbol;Acc:30923] [ENST00000323571]                | 147179 |
| A_24_P149395 | 1.0   | -5.2 | -4.6 | -3.1 | WIPI2 | Homo sapiens WD repeat domain, phosphoinositide interacting 2 (WIPI2), transcript variant 1, mRNA [NM_015610] | 26100  |
| A_23_P81676  | -24.8 | -1.3 | 1.1  | 1.0  | WISP3 | Homo sapiens WNT1 inducible signaling pathway protein 3 (WISP3), transcript variant 3, mRNA [NM_198239]       | 8838   |

|              |      |      |      |      |      |                                                                                                   |       |
|--------------|------|------|------|------|------|---------------------------------------------------------------------------------------------------|-------|
| A_23_P405531 | -1.5 | -1.1 | -2.1 | -1.7 | WIZ  | Homo sapiens widely interspaced zinc finger motifs (WIZ), mRNA [NM_021241]                        | 58525 |
| A_23_P84587  | 1.0  | -1.0 | -1.1 | -4.4 | WNK1 | Homo sapiens WNK lysine deficient protein kinase 1 (WNK1), transcript variant 1, mRNA [NM_018979] | 65125 |
| A_24_P942600 | -1.0 | -1.1 | -2.5 | -1.1 | WNK2 | Homo sapiens mRNA for KIAA1760 protein, partial cds. [AB051547]                                   | 65268 |
| A_32_P99055  | -2.0 | 1.2  | -1.9 | 1.0  | WNK3 | Homo sapiens WNK lysine deficient protein kinase 3 (WNK3), transcript variant 1, mRNA [NM_020922] | 65267 |



|              |     |     |      |      |        |                                                                                                |       |
|--------------|-----|-----|------|------|--------|------------------------------------------------------------------------------------------------|-------|
| A_23_P102117 | 1.5 | 1.2 | -1.0 | 2.1  | WNT10A | Homo sapiens wingless-type MMTV integration site family, member 10A (WNT10A), mRNA [NM_025216] | 80326 |
| A_23_P162322 | 3.9 | 1.1 | 1.1  | 1.2  | WNT10B | Homo sapiens wingless-type MMTV integration site family, member 10B (WNT10B), mRNA [NM_003394] | 7480  |
| A_24_P35643  | 1.2 | 1.0 | 1.3  | -5.6 | WNT11  | Homo sapiens wingless-type MMTV integration site family, member 11 (WNT11), mRNA [NM_004626]   | 7481  |

|              |      |     |      |       |       |                                                                                                                          |       |
|--------------|------|-----|------|-------|-------|--------------------------------------------------------------------------------------------------------------------------|-------|
| A_23_P138352 | 1.1  | 1.0 | 1.1  | -13.5 | WNT2B | Homo sapiens wingless-type MMTV integration site family, member 2B (WNT2B), transcript variant WNT-2B1, mRNA [NM_004185] | 7482  |
| A_23_P385690 | 2.2  | 1.2 | -1.6 | 1.1   | WNT3A | Homo sapiens wingless-type MMTV integration site family, member 3A (WNT3A), mRNA [NM_033131]                             | 89780 |
| A_23_P211926 | -2.1 | 1.0 | -1.0 | 1.3   | WNT5A | Homo sapiens wingless-type MMTV integration site family, member 5A (WNT5A), mRNA [NM_003392]                             | 7474  |

|              |      |      |      |      |       |                                                                                              |      |
|--------------|------|------|------|------|-------|----------------------------------------------------------------------------------------------|------|
| A_23_P119916 | 4.0  | 3.5  | 1.9  | 3.1  | WNT6  | Homo sapiens wingless-type MMTV integration site family, member 6 (WNT6), mRNA [NM_006522]   | 7475 |
| A_24_P208513 | -8.4 | -1.7 | -7.7 | -1.7 | WNT6  | Homo sapiens wingless-type MMTV integration site family, member 6 (WNT6), mRNA [NM_006522]   | 7475 |
| A_23_P258410 | -1.0 | -4.7 | -1.7 | -1.7 | WNT7A | Homo sapiens wingless-type MMTV integration site family, member 7A (WNT7A), mRNA [NM_004625] | 7476 |

|              |       |      |      |      |        |                                                                                                       |       |
|--------------|-------|------|------|------|--------|-------------------------------------------------------------------------------------------------------|-------|
| A_23_P320054 | 1.5   | -1.4 | -1.0 | -2.5 | WNT7B  | Homo sapiens wingless-type MMTV integration site family, member 7B (WNT7B), mRNA [NM_058238]          | 7477  |
| A_23_P55064  | 3.1   | 2.1  | 2.0  | -1.1 | WRAP53 | Homo sapiens WD repeat containing, antisense to TP53 (WRAP53), transcript variant 1, mRNA [NM_018081] | 55135 |
| A_23_P214344 | -19.9 | 1.1  | 1.3  | -1.5 | WRNIP1 | Werner helicase interacting protein 1 [Source:HGNC Symbol;Acc:20876] [ENST00000380769]                | 56897 |

|              |      |      |      |      |       |                                                                                              |       |
|--------------|------|------|------|------|-------|----------------------------------------------------------------------------------------------|-------|
| A_23_P147238 | 1.0  | -1.0 | 5.1  | -1.1 | WSB2  | Homo sapiens WD repeat and SOCS box containing 2 (WSB2), mRNA [NM_018639]                    | 55884 |
| A_23_P305914 | -1.3 | -1.0 | -2.2 | -1.4 | WSCD2 | Homo sapiens WSC domain containing 2 (WSCD2), mRNA [NM_014653]                               | 9671  |
| A_23_P371155 | -1.2 | 3.3  | 1.0  | 1.9  | WTAP  | Homo sapiens Wilms tumor 1 associated protein (WTAP), transcript variant 1, mRNA [NM_004906] | 9589  |
| A_23_P345650 | 1.3  | 1.3  | -2.1 | -1.0 | WWC3  | Homo sapiens WWC family member 3 (WWC3), mRNA [NM_015691]                                    | 55841 |

|              |      |      |      |      |      |                                                                                                 |       |
|--------------|------|------|------|------|------|-------------------------------------------------------------------------------------------------|-------|
| A_23_P34176  | 1.0  | 1.0  | -2.0 | 1.7  | WWC3 | Homo sapiens WWC family member 3 (WWC3), mRNA [NM_015691]                                       | 55841 |
| A_23_P71972  | -1.3 | -5.1 | -1.3 | -1.3 | WVOX | Homo sapiens WW domain containing oxidoreductase (WVOX), transcript variant 1, mRNA [NM_016373] | 51741 |
| A_24_P116606 | -1.2 | 5.5  | -1.2 | 1.9  | WVOX | Homo sapiens WW domain containing oxidoreductase (WVOX), transcript variant 2, mRNA [NM_130791] | 51741 |

|              |      |      |      |      |       |                                                                                                                |       |
|--------------|------|------|------|------|-------|----------------------------------------------------------------------------------------------------------------|-------|
| A_23_P206684 | 1.1  | -7.2 | -1.6 | -1.2 | WWP2  | Homo sapiens WW domain containing E3 ubiquitin protein ligase 2 (WWP2), transcript variant 2, mRNA [NM_199424] | 11060 |
| A_24_P944383 | -2.9 | -1.0 | -1.1 | -1.1 | WWTR1 | Homo sapiens WW domain containing transcription regulator 1 (WWTR1), transcript variant 1, mRNA [NM_015472]    | 25937 |
| A_32_P94866  | 1.1  | 1.0  | -3.5 | -1.1 | WWTR1 | WW domain containing transcription regulator 1 [Source:HGNC Symbol;Acc:24042] [ENST00000474080]                | 25937 |

|              |      |      |      |      |       |                                                                                                             |       |
|--------------|------|------|------|------|-------|-------------------------------------------------------------------------------------------------------------|-------|
| A_32_P6868   | 3.0  | 3.0  | 3.0  | 1.7  | WWTR1 | Homo sapiens WW domain containing transcription regulator 1 (WWTR1), transcript variant 1, mRNA [NM_015472] | 25937 |
| A_24_P2093   | -1.6 | 2.1  | 2.1  | 1.3  | XAB2  | Homo sapiens XPA binding protein 2 (XAB2), mRNA [NM_020196]                                                 | 56949 |
| A_23_P142013 | -2.3 | -3.4 | -2.3 | -2.3 | XAB2  | Homo sapiens XPA binding protein 2 (XAB2), mRNA [NM_020196]                                                 | 56949 |
| A_24_P557479 | -2.7 | 1.0  | -1.1 | 1.0  | XAF1  | Homo sapiens XIAP associated factor 1 (XAF1), transcript variant 1, mRNA [NM_017523]                        | 54739 |



|              |      |      |      |      |        |                                                                                            |        |
|--------------|------|------|------|------|--------|--------------------------------------------------------------------------------------------|--------|
| A_23_P4283   | 6.5  | 6.6  | 3.3  | 2.3  | XAF1   | Homo sapiens XIAP associated factor 1 (XAF1), transcript variant 1, mRNA [NM_017523]       | 54739  |
| A_24_P315014 | 1.7  | 1.7  | 1.7  | 3.6  | XAGE-4 | PREDICTED: Homo sapiens XAGE-4 protein (XAGE-4), miscRNA [XR_113307]                       | 139629 |
| A_23_P120845 | -1.7 | -2.3 | -1.2 | -2.0 | XBP1   | Homo sapiens X-box binding protein 1 (XBP1), transcript variant 1, mRNA [NM_005080]        | 7494   |
| A_23_P18246  | 1.2  | 1.1  | -3.5 | -7.6 | XCR1   | Homo sapiens chemokine (C motif) receptor 1 (XCR1), transcript variant 1, mRNA [NM_005283] | 2829   |

|              |      |      |      |      |       |                                                                                                     |        |
|--------------|------|------|------|------|-------|-----------------------------------------------------------------------------------------------------|--------|
| A_32_P345659 | 3.0  | -1.8 | 1.0  | -1.4 | XIRP1 | Homo sapiens xin actin-binding repeat containing 1 (XIRP1), transcript variant 1, mRNA [NM_194293]  | 165904 |
| A_32_P134007 | -2.1 | -3.9 | -6.6 | -2.4 | XKR4  | Homo sapiens XK, Kell blood group complex subunit-related family, member 4 (XKR4), mRNA [NM_052898] | 114786 |
| A_32_P233877 | 1.2  | -3.8 | 1.2  | 1.1  | XKR5  | Homo sapiens XK, Kell blood group complex subunit-related family, member 5 (XKR5), mRNA [NM_207411] | 389610 |

|             |      |     |      |      |         |                                                                                                           |      |
|-------------|------|-----|------|------|---------|-----------------------------------------------------------------------------------------------------------|------|
| A_23_P60283 | 1.6  | 1.8 | 2.2  | 1.6  | XPA     | Homo sapiens xeroderma pigmentosum, complementation group A (XPA), transcript variant 1, mRNA [NM_000380] | 7507 |
| A_23_P83659 | -1.1 | 2.1 | -1.1 | -1.2 | XPNPEP2 | Homo sapiens X-prolyl aminopeptidase (aminopeptidase P) 2, membrane-bound (XPNPEP2), mRNA [NM_003399]     | 7512 |

|              |      |      |      |     |         |                                                                                                                                                                    |       |
|--------------|------|------|------|-----|---------|--------------------------------------------------------------------------------------------------------------------------------------------------------------------|-------|
| A_24_P923629 | 1.1  | 1.0  | -2.3 | 1.1 | XPNPEP3 | Homo sapiens X-prolyl aminopeptidase (aminopeptidase P) 3, putative (XPNPEP3), nuclear gene encoding mitochondrial protein, transcript variant 1, mRNA [NM_022098] | 63929 |
| A_23_P218793 | -1.3 | -1.3 | -1.6 | 2.4 | XPNPEP3 | Homo sapiens X-prolyl aminopeptidase (aminopeptidase P) 3, putative (XPNPEP3), nuclear gene encoding mitochondrial protein, transcript variant 1, mRNA [NM_022098] | 63929 |

|              |      |       |      |      |      |                                                                                                             |       |
|--------------|------|-------|------|------|------|-------------------------------------------------------------------------------------------------------------|-------|
| A_24_P333716 | -2.1 | 1.6   | 1.4  | 1.3  | XPO4 | Homo sapiens exportin 4 (XPO4), mRNA [NM_022459]                                                            | 64328 |
| A_23_P139983 | 1.7  | -2.2  | 1.8  | 1.1  | XPO4 | Homo sapiens exportin 4 (XPO4), mRNA [NM_022459]                                                            | 64328 |
| A_23_P146237 | -2.3 | 1.0   | 1.1  | 1.0  | XPO7 | Homo sapiens exportin 7 (XPO7), mRNA [NM_015024]                                                            | 23039 |
| A_32_P13719  | 1.0  | -1.0  | -1.0 | -2.4 | XPOT | Homo sapiens exportin, tRNA (nuclear export receptor for tRNAs) (XPOT), mRNA [NM_007235]                    | 11260 |
| A_24_P702813 | 1.9  | -16.6 | -1.9 | 1.4  | XPR1 | Homo sapiens xenotropic and polytropic retrovirus receptor 1 (XPR1), transcript variant 1, mRNA [NM_004736] | 9213  |

|              |      |      |      |      |       |                                                                                                                        |      |
|--------------|------|------|------|------|-------|------------------------------------------------------------------------------------------------------------------------|------|
| A_24_P336417 | -1.5 | -5.3 | -2.0 | 1.1  | XPR1  | Homo sapiens xenotropic and polytropic retrovirus receptor 1 (XPR1), transcript variant 1, mRNA [NM_004736]            | 9213 |
| A_23_P63534  | 1.0  | 1.6  | 47.6 | -1.9 | XPR1  | Homo sapiens xenotropic and polytropic retrovirus receptor 1 (XPR1), transcript variant 1, mRNA [NM_004736]            | 9213 |
| A_32_P77343  | -1.3 | -5.3 | -3.4 | -2.2 | XRCC2 | X-ray repair complementing defective repair in Chinese hamster cells 2 [Source:HGNC Symbol;Acc:12829] [ENST0000495707] | 7516 |

|              |      |      |     |      |          |                                                                                                                                     |       |
|--------------|------|------|-----|------|----------|-------------------------------------------------------------------------------------------------------------------------------------|-------|
| A_23_P48470  | 1.6  | -3.8 | 1.8 | -1.6 | XRCC3    | Homo sapiens X-ray repair complementing defective repair in Chinese hamster cells 3 (XRCC3), transcript variant 2, mRNA [NM_005432] | 7517  |
| A_23_P120947 | 3.4  | 2.2  | 3.3 | 2.1  | XRCC6    | Homo sapiens X-ray repair complementing defective repair in Chinese hamster cells 6 (XRCC6), mRNA [NM_001469]                       | 2547  |
| A_24_P927404 | -3.6 | 1.4  | 1.8 | 1.0  | XRCC6BP1 | Homo sapiens XRCC6 binding protein 1, mRNA (cDNA clone IMAGE:5742519), complete cds. [BC033881]                                     | 91419 |

|              |      |      |      |      |          |                                                                                     |        |
|--------------|------|------|------|------|----------|-------------------------------------------------------------------------------------|--------|
| A_23_P53363  | -1.0 | -1.0 | -5.8 | -1.0 | XRCC6BP1 | Homo sapiens XRCC6 binding protein 1 (XRCC6BP1), mRNA [NM_033276]                   | 91419  |
| A_23_P132822 | 1.9  | 2.5  | -1.4 | 1.9  | XRN1     | Homo sapiens 5'-3' exoribonuclease 1 (XRN1), transcript variant 1, mRNA [NM_019001] | 54464  |
| A_23_P345710 | 1.4  | 4.4  | -1.8 | -1.9 | XXYLT1   | Homo sapiens xyloside xylosyltransferase 1 (XXYLT1), mRNA [NM_152531]               | 152002 |
| A_23_P212423 | -1.0 | -3.0 | -2.0 | -1.0 | XYLB     | Homo sapiens xylulokinase homolog (H. influenzae) (XYLB), mRNA [NM_005108]          | 9942   |
| A_23_P349321 | 1.1  | 1.1  | -2.5 | 1.1  | XYLT1    | Homo sapiens xylosyltransferase I (XYLT1), mRNA [NM_022166]                         | 64131  |



|              |      |      |      |      |       |                                                                                                                                 |       |
|--------------|------|------|------|------|-------|---------------------------------------------------------------------------------------------------------------------------------|-------|
| A_23_P15582  | -3.0 | -1.0 | -1.1 | -1.1 | XYLT2 | Homo sapiens xylosyltransferase II (XYLT2), mRNA [NM_022167]                                                                    | 64132 |
| A_23_P139825 | 1.0  | -1.0 | -1.1 | -3.3 | YAF2  | Homo sapiens YY1 associated factor 2 (YAF2), transcript variant 1, mRNA [NM_001190979]                                          | 10138 |
| A_23_P379550 | -5.4 | -5.8 | -9.8 | -1.8 | YARS  | Homo sapiens tyrosyl-tRNA synthetase (YARS), mRNA [NM_003680]                                                                   | 8565  |
| A_23_P151093 | 1.6  | 1.4  | 1.1  | 2.3  | YARS2 | Homo sapiens tyrosyl-tRNA synthetase 2, mitochondrial (YARS2), nuclear gene encoding mitochondrial protein, mRNA [NM_001040436] | 51067 |

|              |      |      |      |      |        |                                                                                               |       |
|--------------|------|------|------|------|--------|-----------------------------------------------------------------------------------------------|-------|
| A_32_P18547  | -1.0 | 2.1  | -1.0 | -1.0 | YBEY   | Homo sapiens ybeY metalloproteinase (putative) (YBEY), transcript variant 1, mRNA [NM_058181] | 54059 |
| A_32_P169754 | -3.0 | -3.1 | -4.7 | -2.1 | YBX1   | Homo sapiens Y box binding protein 1 (YBX1), mRNA [NM_004559]                                 | 4904  |
| A_23_P49865  | 3.9  | 2.0  | 5.9  | 4.6  | YBX2   | Homo sapiens Y box binding protein 2 (YBX2), mRNA [NM_015982]                                 | 51087 |
| A_24_P376159 | -2.1 | -1.2 | 1.2  | 2.8  | YEATS2 | Homo sapiens cDNA FLJ33401 fis, clone BRACE2009886. [AK090720]                                | 55689 |

|              |      |      |      |      |       |                                                                                                                |       |
|--------------|------|------|------|------|-------|----------------------------------------------------------------------------------------------------------------|-------|
| A_23_P164507 | -4.9 | -1.1 | -1.2 | -1.4 | YES1  | Homo sapiens v-yes-1 Yamaguchi sarcoma viral oncogene homolog 1 (YES1), mRNA [NM_005433]                       | 7525  |
| A_24_P48403  | 1.1  | 2.2  | 1.1  | 1.0  | YES1  | Homo sapiens v-yes-1 Yamaguchi sarcoma viral oncogene homolog 1 (YES1), mRNA [NM_005433]                       | 7525  |
| A_23_P142239 | 1.0  | -1.1 | -2.2 | 1.0  | YIF1B | Homo sapiens Yip1 interacting factor homolog B (S. cerevisiae) (YIF1B), transcript variant 2, mRNA [NM_033557] | 90522 |

|              |      |      |      |      |       |                                                                                                                |        |
|--------------|------|------|------|------|-------|----------------------------------------------------------------------------------------------------------------|--------|
| A_24_P307248 | 2.2  | 1.8  | 1.9  | -1.0 | YIF1B | Homo sapiens Yip1 interacting factor homolog B (S. cerevisiae) (YIF1B), transcript variant 2, mRNA [NM_033557] | 90522  |
| A_23_P154006 | -1.4 | -2.4 | -2.2 | -3.7 | YIPF4 | Yip1 domain family, member 4 [Source:HGNC Symbol;Acc:28145] [ENST0000238831]                                   | 84272  |
| A_32_P488818 | -2.4 | -1.3 | -1.3 | -1.3 | YIPF7 | Homo sapiens Yip1 domain family, member 7 (YIPF7), mRNA [NM_182592]                                            | 285525 |
| A_24_P119374 | -1.0 | -2.5 | -1.4 | 1.0  | YLPM1 | Homo sapiens YLP motif containing 1 (YLPM1), mRNA [NM_019589]                                                  | 56252  |

|              |       |      |      |       |       |                                                                                                |        |
|--------------|-------|------|------|-------|-------|------------------------------------------------------------------------------------------------|--------|
| A_32_P69803  | -10.5 | -1.5 | -1.2 | -1.2  | YOD1  | Homo sapiens YOD1 OTU deubiquinating enzyme 1 homolog (S. cerevisiae) (YOD1), mRNA [NM_018566] | 55432  |
| A_32_P88120  | 4.2   | 3.1  | 1.8  | 6.1   | YPEL1 | Homo sapiens yippee-like 1 (Drosophila) (YPEL1), mRNA [NM_013313]                              | 29799  |
| A_24_P787947 | -1.7  | -5.2 | -2.3 | -1.8  | YPEL2 | Homo sapiens yippee-like 2 (Drosophila) (YPEL2), mRNA [NM_001005404]                           | 388403 |
| A_23_P15108  | 1.1   | 1.3  | 1.4  | -16.1 | YPEL3 | Homo sapiens yippee-like 3 (Drosophila) (YPEL3), transcript variant 1, mRNA [NM_031477]        | 83719  |

|              |      |      |      |      |          |                                                                                                                                                       |        |
|--------------|------|------|------|------|----------|-------------------------------------------------------------------------------------------------------------------------------------------------------|--------|
| A_23_P300220 | -1.5 | -1.4 | 2.1  | 1.0  | YPEL4    | Homo sapiens yippee-like 4 (Drosophila) (YPEL4), mRNA [NM_145008]                                                                                     | 219539 |
| A_24_P932875 | -4.8 | -1.0 | -3.8 | -1.2 | YPLR6490 | PREDICTED: Homo sapiens hypothetical LOC389102 (YPLR6490), miscRNA [XR_110047]                                                                        | 389102 |
| A_23_P500251 | -1.3 | -1.1 | -1.1 | -8.0 | YWHAB    | Homo sapiens tyrosine 3-monooxygenase/tryptophan 5-monooxygenase activation protein, beta polypeptide (YWHAB), transcript variant 1, mRNA [NM_003404] | 7529   |

|              |      |      |      |      |       |                                                                                                                                                          |      |
|--------------|------|------|------|------|-------|----------------------------------------------------------------------------------------------------------------------------------------------------------|------|
| A_24_P33444  | 1.0  | -1.0 | 3.6  | -4.2 | YWHAE | Homo sapiens tyrosine 3-monooxygenase/tryptophan 5-monooxygenase activation protein, epsilon polypeptide (YWHAE), transcript variant 1, mRNA [NM_006761] | 7531 |
| A_24_P123012 | -1.1 | 1.4  | -2.5 | 2.5  | YWHAE | Homo sapiens tyrosine 3-monooxygenase/tryptophan 5-monooxygenase activation protein, epsilon polypeptide (YWHAE), transcript variant 1, mRNA [NM_006761] | 7531 |

|              |      |      |      |      |       |                                                                                                                                                       |      |
|--------------|------|------|------|------|-------|-------------------------------------------------------------------------------------------------------------------------------------------------------|------|
| A_24_P209571 | -1.7 | -1.6 | -1.2 | -2.9 | YWHAZ | Homo sapiens tyrosine 3-monooxygenase/tryptophan 5-monooxygenase activation protein, zeta polypeptide (YWHAZ), transcript variant 2, mRNA [NM_145690] | 7534 |
| A_32_P226149 | 1.7  | 3.6  | 3.4  | 1.1  | YWHAZ | Homo sapiens tyrosine 3-monooxygenase/tryptophan 5-monooxygenase activation protein, zeta polypeptide (YWHAZ), transcript variant 2, mRNA [NM_145690] | 7534 |



|              |      |      |      |      |       |                                                                                                                                                       |        |
|--------------|------|------|------|------|-------|-------------------------------------------------------------------------------------------------------------------------------------------------------|--------|
| A_24_P492562 | 1.2  | 1.0  | -1.7 | -5.6 | YWHAZ | Homo sapiens tyrosine 3-monooxygenase/tryptophan 5-monooxygenase activation protein, zeta polypeptide (YWHAZ), transcript variant 2, mRNA [NM_145690] | 7534   |
| A_23_P349398 | -1.4 | -2.3 | 1.4  | -1.8 | ZAR1  | Homo sapiens zygote arrest 1 (ZAR1), mRNA [NM_175619]                                                                                                 | 326340 |
| A_23_P61031  | -2.3 | 1.2  | 1.1  | -1.3 | ZBBX  | Homo sapiens zinc finger, B-box domain containing (ZBBX), transcript variant 2, mRNA [NM_024687]                                                      | 79740  |

|              |       |      |      |      |       |                                                                                                 |       |
|--------------|-------|------|------|------|-------|-------------------------------------------------------------------------------------------------|-------|
| A_32_P86623  | -10.3 | -1.0 | -2.8 | -1.1 | ZBED1 | Homo sapiens zinc finger, BED-type containing 1 (ZBED1), transcript variant 2, mRNA [NM_004729] | 9189  |
| A_23_P93032  | 1.3   | -1.0 | 1.0  | -2.6 | ZBED3 | Homo sapiens zinc finger, BED-type containing 3 (ZBED3), mRNA [NM_032367]                       | 84327 |
| A_23_P98483  | 1.4   | 2.5  | -1.2 | 2.2  | ZBED5 | Homo sapiens zinc finger, BED-type containing 5 (ZBED5), transcript variant 1, mRNA [NM_021211] | 58486 |
| A_24_P920319 | 3.7   | 3.6  | 3.7  | 3.6  | ZBED5 | Homo sapiens transposon-derived Buster1 transposase-like protein mRNA, complete cds. [AF205600] | 58486 |

|              |      |       |      |      |        |                                                                                                        |       |
|--------------|------|-------|------|------|--------|--------------------------------------------------------------------------------------------------------|-------|
| A_24_P395966 | 2.9  | 1.7   | 3.0  | 1.6  | ZBP1   | Homo sapiens Z-DNA binding protein 1 (ZBP1), transcript variant 1, mRNA [NM_030776]                    | 81030 |
| A_24_P64918  | -1.0 | -15.2 | 1.0  | -1.0 | ZBTB1  | Homo sapiens zinc finger and BTB domain containing 1 (ZBTB1), transcript variant 2, mRNA [NM_014950]   | 22890 |
| A_24_P64071  | 1.1  | -2.1  | -1.1 | -1.1 | ZBTB10 | Homo sapiens zinc finger and BTB domain containing 10 (ZBTB10), transcript variant 2, mRNA [NM_023929] | 65986 |

|              |     |      |      |      |        |                                                                                                        |       |
|--------------|-----|------|------|------|--------|--------------------------------------------------------------------------------------------------------|-------|
| A_23_P385114 | 2.1 | 2.1  | 2.2  | 1.0  | ZBTB10 | Homo sapiens zinc finger and BTB domain containing 10 (ZBTB10), transcript variant 2, mRNA [NM_023929] | 65986 |
| A_23_P109774 | 1.0 | -2.1 | -1.9 | -1.1 | ZBTB11 | Homo sapiens zinc finger and BTB domain containing 11 (ZBTB11), mRNA [NM_014415]                       | 27107 |
| A_23_P104804 | 1.1 | 1.0  | 1.7  | -2.0 | ZBTB16 | Homo sapiens zinc finger and BTB domain containing 16 (ZBTB16), transcript variant 1, mRNA [NM_006006] | 7704  |

|              |      |       |      |      |            |                                                                                                        |           |
|--------------|------|-------|------|------|------------|--------------------------------------------------------------------------------------------------------|-----------|
| A_23_P654    | 1.5  | 1.2   | 1.3  | 2.3  | ZBTB17     | Homo sapiens zinc finger and BTB domain containing 17 (ZBTB17), transcript variant 2, mRNA [NM_003443] | 7709      |
| A_32_P179526 | -4.3 | 1.7   | 1.6  | 1.3  | ZBTB20     | zinc finger and BTB domain containing 20 [Source:HGNC Symbol;Acc:13503] [ENST00000488663]              | 26137     |
| A_24_P728215 | -1.3 | -31.3 | -1.4 | -1.6 | ZBTB20-AS1 | Homo sapiens ZBTB20 antisense RNA 1 (non-protein coding) (ZBTB20-AS1), non-coding RNA [NR_038993]      | 100131117 |

|              |      |      |      |      |        |                                                                                                        |       |
|--------------|------|------|------|------|--------|--------------------------------------------------------------------------------------------------------|-------|
| A_23_P111188 | 1.8  | -5.3 | 1.4  | 1.0  | ZBTB22 | Homo sapiens zinc finger and BTB domain containing 22 (ZBTB22), transcript variant 1, mRNA [NM_005453] | 9278  |
| A_23_P134147 | -2.5 | -1.8 | -1.6 | -2.0 | ZBTB24 | Homo sapiens zinc finger and BTB domain containing 24 (ZBTB24), transcript variant 1, mRNA [NM_014797] | 9841  |
| A_23_P96483  | 2.4  | 3.9  | 4.0  | -1.2 | ZBTB33 | Homo sapiens zinc finger and BTB domain containing 33 (ZBTB33), transcript variant 2, mRNA [NM_006777] | 10009 |

|              |      |      |      |      |        |                                                                                                        |        |
|--------------|------|------|------|------|--------|--------------------------------------------------------------------------------------------------------|--------|
| A_23_P212025 | 4.7  | 4.9  | 4.0  | 2.7  | ZBTB38 | Homo sapiens zinc finger and BTB domain containing 38 (ZBTB38), mRNA [NM_001080412]                    | 253461 |
| A_24_P221323 | -1.2 | -1.2 | -1.5 | -2.1 | ZBTB38 | Homo sapiens zinc finger and BTB domain containing 38 (ZBTB38), mRNA [NM_001080412]                    | 253461 |
| A_23_P13683  | 1.2  | -3.8 | -1.8 | 1.1  | ZBTB39 | Homo sapiens zinc finger and BTB domain containing 39 (ZBTB39), mRNA [NM_014830]                       | 9880   |
| A_23_P160136 | 3.7  | 2.4  | 3.5  | 3.8  | ZBTB40 | Homo sapiens zinc finger and BTB domain containing 40 (ZBTB40), transcript variant 2, mRNA [NM_014870] | 9923   |

|              |      |      |      |      |        |                                                                                                        |       |
|--------------|------|------|------|------|--------|--------------------------------------------------------------------------------------------------------|-------|
| A_23_P113328 | -1.2 | 1.3  | -1.6 | 2.1  | ZBTB41 | Homo sapiens zinc finger and BTB domain containing 41 (ZBTB41), mRNA [NM_194314]                       | 36023 |
| A_23_P135315 | -2.0 | -1.1 | -1.6 | 3.2  | ZBTB43 | Homo sapiens zinc finger and BTB domain containing 43 (ZBTB43), transcript variant 1, mRNA [NM_014007] | 23099 |
| A_23_P385826 | 1.1  | 1.0  | -1.0 | -2.5 | ZBTB44 | zinc finger and BTB domain containing 44 [Source:HGNC Symbol;Acc:25001] [ENST00000529348]              | 29068 |
| A_23_P202945 | -2.2 | 1.1  | 2.8  | 3.2  | ZBTB44 | Homo sapiens zinc finger and BTB domain containing 44 (ZBTB44), mRNA [NM_014155]                       | 29068 |



|              |      |      |      |      |        |                                                                                  |       |
|--------------|------|------|------|------|--------|----------------------------------------------------------------------------------|-------|
| A_32_P175183 | -1.0 | 2.6  | 2.7  | 1.7  | ZBTB44 | Homo sapiens zinc finger and BTB domain containing 44 (ZBTB44), mRNA [NM_014155] | 29068 |
| A_23_P421638 | -1.1 | -2.7 | -1.2 | -1.3 | ZBTB47 | Homo sapiens zinc finger and BTB domain containing 47 (ZBTB47), mRNA [NM_145166] | 92999 |
| A_23_P216476 | 4.1  | 2.6  | 2.2  | -1.0 | ZBTB5  | Homo sapiens zinc finger and BTB domain containing 5 (ZBTB5), mRNA [NM_014872]   | 9925  |
| A_23_P27827  | -1.3 | -1.1 | -3.0 | 1.2  | ZBTB7A | Homo sapiens zinc finger and BTB domain containing 7A (ZBTB7A), mRNA [NM_015898] | 51341 |

|              |      |      |      |      |        |                                                                                     |        |
|--------------|------|------|------|------|--------|-------------------------------------------------------------------------------------|--------|
| A_24_P19884  | -1.2 | 2.0  | 1.8  | 1.2  | ZBTB7B | Homo sapiens zinc finger and BTB domain containing 7B (ZBTB7B), mRNA [NM_015872]    | 51043  |
| A_23_P11729  | -3.7 | -3.9 | -4.1 | -3.9 | ZBTB7B | Homo sapiens zinc finger and BTB domain containing 7B (ZBTB7B), mRNA [NM_015872]    | 51043  |
| A_23_P345973 | 2.7  | 1.7  | 1.7  | -6.4 | ZBTB7C | Homo sapiens zinc finger and BTB domain containing 7C (ZBTB7C), mRNA [NM_001039360] | 201501 |
| A_23_P139455 | 1.1  | -4.5 | -2.0 | -1.7 | ZC3H10 | Homo sapiens zinc finger CCCH-type containing 10 (ZC3H10), mRNA [NM_032786]         | 84872  |

|              |      |      |      |      |         |                                                                               |       |
|--------------|------|------|------|------|---------|-------------------------------------------------------------------------------|-------|
| A_23_P255194 | 1.4  | -1.9 | -2.0 | 1.4  | ZC3H11A | Homo sapiens zinc finger CCCH-type containing 11A (ZC3H11A), mRNA [NM_014827] | 9877  |
| A_24_P19993  | 1.5  | -2.0 | -2.2 | -2.2 | ZC3H11A | Homo sapiens zinc finger CCCH-type containing 11A (ZC3H11A), mRNA [NM_014827] | 9877  |
| A_32_P221076 | 1.3  | -1.1 | -2.1 | 1.0  | ZC3H11A | Homo sapiens zinc finger CCCH-type containing 11A (ZC3H11A), mRNA [NM_014827] | 9877  |
| A_23_P388993 | -1.0 | -1.0 | -1.0 | -5.0 | ZC3H12C | Homo sapiens zinc finger CCCH-type containing 12C (ZC3H12C), mRNA [NM_033390] | 85463 |

|              |      |      |      |      |         |                                                                                     |        |
|--------------|------|------|------|------|---------|-------------------------------------------------------------------------------------|--------|
| A_32_P65533  | -1.2 | -1.1 | -8.9 | -1.2 | ZC3H12D | Homo sapiens zinc finger CCCH-type containing 12D (ZC3H12D), mRNA [NM_207360]       | 340152 |
| A_24_P109176 | -7.8 | 1.1  | 1.0  | 1.1  | ZC3H12D | Homo sapiens zinc finger CCCH-type containing 12D (ZC3H12D), mRNA [NM_207360]       | 340152 |
| A_24_P187826 | 1.0  | -1.0 | -2.2 | -1.1 | ZC3H12D | Homo sapiens zinc finger CCCH-type containing 12D (ZC3H12D), mRNA [NM_207360]       | 340152 |
| A_24_P232763 | 1.5  | -1.9 | -3.4 | 1.0  | ZC3H13  | zinc finger CCCH-type containing 13 [Source:HGNC Symbol;Acc:20368] [ENST0000242848] | 23091  |

|              |      |      |      |      |        |                                                                                                   |        |
|--------------|------|------|------|------|--------|---------------------------------------------------------------------------------------------------|--------|
| A_24_P241330 | -1.6 | -1.7 | -1.5 | -3.2 | ZC3H14 | Homo sapiens zinc finger CCCH-type containing 14 (ZC3H14), transcript variant 1, mRNA [NM_024824] | 79882  |
| A_23_P3502   | 1.4  | 2.2  | 1.6  | 1.5  | ZC3H18 | Homo sapiens zinc finger CCCH-type containing 18 (ZC3H18), mRNA [NM_144604]                       | 124245 |
| A_23_P9036   | -2.1 | 1.6  | -1.4 | -2.4 | ZC3H3  | Homo sapiens zinc finger CCCH-type containing 3 (ZC3H3), mRNA [NM_015117]                         | 23144  |
| A_24_P220618 | -2.2 | -3.9 | -2.1 | -1.2 | ZC3H4  | Homo sapiens zinc finger CCCH-type containing 4 (ZC3H4), mRNA [NM_015168]                         | 23211  |

|              |      |      |      |       |        |                                                                             |        |
|--------------|------|------|------|-------|--------|-----------------------------------------------------------------------------|--------|
| A_24_P826348 | -7.4 | -2.0 | -1.0 | 1.0   | ZC3H6  | Homo sapiens zinc finger CCCH-type containing 6 (ZC3H6), mRNA [NM_198581]   | 376940 |
| A_23_P26336  | 1.0  | 1.0  | 1.1  | -38.1 | ZC3H7A | Homo sapiens zinc finger CCCH-type containing 7A (ZC3H7A), mRNA [NM_014153] | 29066  |
| A_24_P119283 | 4.3  | 2.9  | 4.3  | 2.0   | ZC3H7A | Homo sapiens zinc finger CCCH-type containing 7A (ZC3H7A), mRNA [NM_014153] | 29066  |
| A_23_P218807 | -2.6 | 1.0  | -2.9 | 1.1   | ZC3H7B | Homo sapiens zinc finger CCCH-type containing 7B (ZC3H7B), mRNA [NM_017590] | 23264  |

|              |      |      |      |      |          |                                                                                                            |       |
|--------------|------|------|------|------|----------|------------------------------------------------------------------------------------------------------------|-------|
| A_24_P797678 | 1.0  | -2.2 | -2.1 | -2.9 | ZC3H7B   | Homo sapiens zinc finger CCCH-type containing 7B, mRNA (cDNA clone IMAGE:3690478), partial cds. [BC004857] | 23264 |
| A_23_P20122  | 1.8  | 4.7  | 1.8  | 1.7  | ZC3HAV1  | Homo sapiens zinc finger CCCH-type, antiviral 1 (ZC3HAV1), transcript variant 2, mRNA [NM_024625]          | 56829 |
| A_24_P923142 | -8.6 | -3.7 | -3.6 | -3.9 | ZC3HAV1L | Homo sapiens cDNA FLJ40837 fis, clone TRACH2013495. [AK098156]                                             | 92092 |
| A_23_P31532  | -1.1 | 2.5  | -1.1 | 1.8  | ZC3HAV1L | Homo sapiens zinc finger CCCH-type, antiviral 1-like (ZC3HAV1L), mRNA [NM_080660]                          | 92092 |

|              |      |      |      |      |         |                                                                                 |        |
|--------------|------|------|------|------|---------|---------------------------------------------------------------------------------|--------|
| A_23_P215088 | -2.5 | 1.0  | 1.0  | 1.1  | ZC3HC1  | Homo sapiens zinc finger, C3HC-type containing 1 (ZC3HC1), mRNA [NM_016478]     | 51530  |
| A_32_P11096  | -2.4 | -2.0 | -1.1 | -2.1 | ZCCHC13 | Homo sapiens zinc finger, CCHC domain containing 13 (ZCCHC13), mRNA [NM_203303] | 389874 |
| A_23_P100420 | 1.1  | -2.5 | -4.2 | 1.1  | ZCCHC14 | Homo sapiens zinc finger, CCHC domain containing 14 (ZCCHC14), mRNA [NM_015144] | 23174  |
| A_24_P176484 | 1.6  | 1.2  | -2.3 | 1.9  | ZCCHC14 | Homo sapiens zinc finger, CCHC domain containing 14 (ZCCHC14), mRNA [NM_015144] | 23174  |



|              |      |     |      |      |         |                                                                                 |        |
|--------------|------|-----|------|------|---------|---------------------------------------------------------------------------------|--------|
| A_24_P88505  | 9.0  | 8.9 | 8.6  | 8.8  | ZCCHC17 | Homo sapiens zinc finger, CCHC domain containing 17 (ZCCHC17), mRNA [NM_016505] | 51538  |
| A_32_P1509   | 1.0  | 2.4 | -1.1 | -1.1 | ZCCHC17 | Homo sapiens zinc finger, CCHC domain containing 17 (ZCCHC17), mRNA [NM_016505] | 51538  |
| A_23_P335452 | -3.2 | 1.2 | 2.5  | 1.0  | ZCCHC24 | Homo sapiens zinc finger, CCHC domain containing 24 (ZCCHC24), mRNA [NM_153367] | 219654 |
| A_24_P399694 | 3.0  | 2.9 | 2.9  | 2.2  | ZCCHC3  | Homo sapiens zinc finger, CCHC domain containing 3 (ZCCHC3), mRNA [NM_033089]   | 85364  |

|              |      |      |      |      |        |                                                                               |        |
|--------------|------|------|------|------|--------|-------------------------------------------------------------------------------|--------|
| A_24_P248863 | 1.0  | -9.3 | -1.1 | -1.0 | ZCCHC4 | Homo sapiens zinc finger, CCHC domain containing 4 (ZCCHC4), mRNA [NM_024936] | 29063  |
| A_23_P155807 | -2.5 | 1.0  | -1.0 | -1.0 | ZCCHC4 | Homo sapiens zinc finger, CCHC domain containing 4 (ZCCHC4), mRNA [NM_024936] | 29063  |
| A_23_P411353 | 4.9  | 2.3  | 2.3  | 3.1  | ZCCHC5 | Homo sapiens zinc finger, CCHC domain containing 5 (ZCCHC5), mRNA [NM_152694] | 203430 |

|              |      |      |      |      |        |                                                                                                     |       |
|--------------|------|------|------|------|--------|-----------------------------------------------------------------------------------------------------|-------|
| A_24_P68275  | -3.1 | 3.8  | 2.0  | 2.5  | ZCCHC6 | Homo sapiens zinc finger, CCHC domain containing 6 (ZCCHC6), transcript variant 1, mRNA [NM_024617] | 79670 |
| A_23_P123727 | 1.0  | -2.2 | -1.0 | -1.1 | ZCCHC6 | Homo sapiens zinc finger, CCHC domain containing 6 (ZCCHC6), transcript variant 1, mRNA [NM_024617] | 79670 |
| A_24_P85026  | -8.2 | 1.0  | 1.0  | -1.0 | ZCCHC7 | Homo sapiens zinc finger, CCHC domain containing 7 (ZCCHC7), mRNA [NM_032226]                       | 84186 |

|              |      |      |      |      |         |                                                                                 |       |
|--------------|------|------|------|------|---------|---------------------------------------------------------------------------------|-------|
| A_23_P64669  | -1.0 | -1.1 | -1.1 | -2.3 | ZCCHC8  | Homo sapiens zinc finger, CCHC domain containing 8 (ZCCHC8), mRNA [NM_017612]   | 55596 |
| A_23_P70897  | -1.0 | -2.1 | -1.1 | -1.0 | ZCWPW1  | Homo sapiens zinc finger, CW type with PWWP domain 1 (ZCWPW1), mRNA [NM_017984] | 55063 |
| A_23_P66038  | -2.5 | -2.9 | -1.3 | -1.5 | ZDHHC1  | Homo sapiens zinc finger, DHHC-type containing 1 (ZDHHC1), mRNA [NM_013304]     | 29800 |
| A_23_P158007 | 1.5  | 1.2  | -1.1 | 2.2  | ZDHHC12 | Homo sapiens zinc finger, DHHC-type containing 12 (ZDHHC12), mRNA [NM_032799]   | 84885 |

|              |      |      |      |      |         |                                                                                                        |        |
|--------------|------|------|------|------|---------|--------------------------------------------------------------------------------------------------------|--------|
| A_24_P269129 | -2.1 | -1.8 | -1.8 | -1.7 | ZDHHC14 | Homo sapiens zinc finger, DHHC-type containing 14 (ZDHHC14), transcript variant 2, mRNA [NM_153746]    | 79683  |
| A_24_P934235 | 1.0  | -1.0 | -3.0 | -1.1 | ZDHHC15 | Homo sapiens zinc finger, DHHC-type containing 15 (ZDHHC15), transcript variant 3, mRNA [NM_001146257] | 158866 |
| A_23_P150009 | -1.7 | -1.6 | -6.8 | -3.0 | ZDHHC16 | Homo sapiens zinc finger, DHHC-type containing 16 (ZDHHC16), transcript variant 5, mRNA [NM_198046]    | 84287  |

|              |      |      |      |      |         |                                                                                  |        |
|--------------|------|------|------|------|---------|----------------------------------------------------------------------------------|--------|
| A_32_P95949  | -1.7 | -1.0 | -1.0 | 3.1  | ZDHHC17 | Homo sapiens zinc finger, DHHC-type containing 17 (ZDHHC17), mRNA [NM_015336]    | 23390  |
| A_23_P314789 | 1.2  | -1.3 | -4.6 | -1.2 | ZDHHC19 | Homo sapiens zinc finger, DHHC-type containing 19 (ZDHHC19), mRNA [NM_001039617] | 131540 |
| A_24_P155603 | -2.7 | 1.0  | 1.1  | 1.0  | ZDHHC20 | Homo sapiens zinc finger, DHHC-type containing 20 (ZDHHC20), mRNA [NM_153251]    | 253832 |
| A_24_P933492 | -1.3 | -1.3 | -8.5 | -1.6 | ZDHHC21 | Homo sapiens zinc finger, DHHC-type containing 21 (ZDHHC21), mRNA [NM_178566]    | 340481 |

|              |      |      |      |      |         |                                                                                       |        |
|--------------|------|------|------|------|---------|---------------------------------------------------------------------------------------|--------|
| A_24_P99175  | 17.0 | 41.5 | 44.6 | 44.4 | ZDHHC22 | Homo sapiens zinc finger, DHHC-type containing 22 (ZDHHC22), mRNA [NM_174976]         | 283576 |
| A_32_P75243  | 4.4  | 4.4  | 4.0  | 4.4  | ZDHHC22 | zinc finger, DHHC-type containing 22 [Source:HGNC Symbol;Acc:20106] [ENST00000555327] | 283576 |
| A_23_P355447 | 1.5  | 1.2  | -3.4 | 1.4  | ZDHHC22 | Homo sapiens zinc finger, DHHC-type containing 22 (ZDHHC22), mRNA [NM_174976]         | 283576 |

|              |      |      |       |      |         |                                                                                                   |        |
|--------------|------|------|-------|------|---------|---------------------------------------------------------------------------------------------------|--------|
| A_24_P259276 | -1.8 | -2.5 | -1.1  | -1.3 | ZDHHC24 | Homo sapiens zinc finger, DHHC-type containing 24 (ZDHHC24), mRNA [NM_207340]                     | 254359 |
| A_24_P342880 | 1.2  | -1.4 | -2.1  | -1.2 | ZDHHC3  | Homo sapiens zinc finger, DHHC-type containing 3 (ZDHHC3), transcript variant 2, mRNA [NM_016598] | 51304  |
| A_24_P351420 | 1.2  | 1.1  | -11.3 | 1.0  | ZDHHC3  | Homo sapiens zinc finger, DHHC-type containing 3 (ZDHHC3), transcript variant 2, mRNA [NM_016598] | 51304  |



|              |      |      |      |      |        |                                                                                                   |       |
|--------------|------|------|------|------|--------|---------------------------------------------------------------------------------------------------|-------|
| A_23_P157147 | 3.6  | 3.5  | 3.1  | 3.1  | ZDHHC4 | Homo sapiens zinc finger, DHHC-type containing 4 (ZDHHC4), transcript variant 3, mRNA [NM_018106] | 55146 |
| A_23_P98532  | -1.4 | -5.6 | 1.9  | 1.0  | ZDHHC5 | Homo sapiens zinc finger, DHHC-type containing 5 (ZDHHC5), mRNA [NM_015457]                       | 25921 |
| A_23_P142560 | -1.5 | -1.3 | -2.1 | -1.1 | ZEB2   | Homo sapiens zinc finger E-box binding homeobox 2 (ZEB2), transcript variant 1, mRNA [NM_014795]  | 9839  |

|              |      |      |      |      |        |                                                                                                             |       |
|--------------|------|------|------|------|--------|-------------------------------------------------------------------------------------------------------------|-------|
| A_23_P407203 | -5.0 | 1.7  | -1.5 | 1.6  | ZEB2   | Homo sapiens zinc finger E-box binding homeobox 2 (ZEB2), transcript variant 3, non-coding RNA [NR_033258]  | 9839  |
| A_24_P170826 | -2.2 | -1.7 | -1.8 | -1.7 | ZER1   | Homo sapiens zer-1 homolog (C. elegans) (ZER1), mRNA [NM_006336]                                            | 10444 |
| A_23_P122375 | 2.3  | -1.1 | 1.4  | -1.3 | ZFAND3 | Homo sapiens zinc finger, AN1-type domain 3 (ZFAND3), mRNA [NM_021943]                                      | 60685 |
| A_23_P1170   | -2.4 | -1.8 | -5.2 | -2.2 | ZFAND4 | Homo sapiens AN1, ubiquitin-like, homolog (Xenopus laevis) (ANUBL1), transcript variant 1, mRNA [NM_174890] | 93550 |

|              |       |      |      |      |        |                                                                                                       |        |
|--------------|-------|------|------|------|--------|-------------------------------------------------------------------------------------------------------|--------|
| A_24_P278172 | -1.5  | -2.2 | -2.0 | -1.3 | ZFAND5 | Homo sapiens zinc finger, AN1-type domain 5 (ZFAND5), transcript variant c, mRNA [NM_006007]          | 7763   |
| A_32_P109817 | 2.9   | 4.8  | 2.0  | 2.5  | ZFAND5 | Homo sapiens zinc finger, AN1-type domain 5 (ZFAND5), transcript variant c, mRNA [NM_006007]          | 7763   |
| A_32_P109922 | -12.5 | 1.1  | -1.0 | 1.0  | ZFAT   | Homo sapiens zinc finger and AT hook domain containing (ZFAT), transcript variant 1, mRNA [NM_020863] | 57623  |
| A_23_P332908 | -2.3  | -1.1 | -1.1 | -3.7 | ZFC3H1 | Homo sapiens zinc finger, C3H1-type containing (ZFC3H1), mRNA [NM_144982]                             | 196441 |

|              |      |     |      |      |        |                                                                                     |        |
|--------------|------|-----|------|------|--------|-------------------------------------------------------------------------------------|--------|
| A_23_P14369  | 1.6  | 1.5 | 1.5  | -2.2 | ZFHX2  | zinc finger homeobox 2<br>[Source:HGNC Symbol;Accession:20152]<br>[ENST00000382785] | 85446  |
| A_32_P226205 | 1.2  | 2.7 | -1.2 | 2.0  | ZFHX2  | Homo sapiens zinc finger homeobox 2 (ZFHX2), mRNA<br>[NM_033400]                    | 85446  |
| A_23_P77310  | 1.4  | 1.4 | 1.8  | 2.6  | ZFP106 | Homo sapiens zinc finger protein 106 homolog (mouse) (ZFP106), mRNA<br>[NM_022473]  | 64397  |
| A_24_P151106 | -3.2 | 1.0 | -1.1 | 1.0  | ZFP28  | Homo sapiens zinc finger protein 28 homolog (mouse) (ZFP28), mRNA<br>[NM_020828]    | 140612 |

|              |      |      |      |      |         |                                                                                          |        |
|--------------|------|------|------|------|---------|------------------------------------------------------------------------------------------|--------|
| A_23_P107673 | -2.9 | -1.6 | -3.4 | -4.6 | ZFP28   | Homo sapiens zinc finger protein 28 homolog (mouse) (ZFP28), mRNA [NM_020828]            | 140612 |
| A_23_P119732 | -2.3 | 1.1  | 1.1  | -1.9 | ZFP30   | Homo sapiens zinc finger protein 30 homolog (mouse) (ZFP30), mRNA [NM_014898]            | 22835  |
| A_23_P39237  | -1.1 | 1.4  | -2.3 | -6.0 | ZFP36   | Homo sapiens zinc finger protein 36, C3H type, homolog (mouse) (ZFP36), mRNA [NM_003407] | 7538   |
| A_23_P406071 | -1.1 | 1.7  | 1.5  | -2.2 | ZFP36L1 | zinc finger protein 36, C3H type-like 1 [Source:HGNC Symbol;Acc:1107] [ENST00000408913]  | 677    |

|              |      |      |      |      |         |                                                                                                        |        |
|--------------|------|------|------|------|---------|--------------------------------------------------------------------------------------------------------|--------|
| A_24_P99152  | 2.4  | -1.0 | -1.9 | -1.1 | ZFP36L1 | Homo sapiens zinc finger protein 36, C3H type-like 1 (ZFP36L1), transcript variant 1, mRNA [NM_004926] | 677    |
| A_23_P346357 | 3.2  | 2.5  | 4.4  | 3.9  | ZFP41   | Homo sapiens zinc finger protein 41 homolog (mouse) (ZFP41), mRNA [NM_173832]                          | 286128 |
| A_23_P69877  | -1.8 | 1.0  | 1.0  | -4.7 | ZFP62   | Homo sapiens zinc finger protein 62 homolog (mouse) (ZFP62), transcript variant 1, mRNA [NM_152283]    | 643836 |
| A_24_P176409 | -1.0 | -5.2 | -1.9 | -1.2 | ZFP90   | Homo sapiens zinc finger protein 90 homolog (mouse) (ZFP90), mRNA [NM_133458]                          | 146198 |

|              |      |      |      |      |       |                                                                                                  |       |
|--------------|------|------|------|------|-------|--------------------------------------------------------------------------------------------------|-------|
| A_23_P168909 | -1.1 | -1.1 | -6.2 | -1.2 | ZFPM2 | Homo sapiens zinc finger protein, multitype 2 (ZFPM2), mRNA [NM_012082]                          | 23414 |
| A_24_P273857 | 1.1  | 1.1  | 1.0  | -4.0 | ZFPM2 | Homo sapiens zinc finger protein, multitype 2 (ZFPM2), mRNA [NM_012082]                          | 23414 |
| A_23_P41818  | 3.9  | 3.9  | 4.0  | 4.7  | ZFR   | Homo sapiens zinc finger RNA binding protein (ZFR), mRNA [NM_016107]                             | 51663 |
| A_32_P55462  | 6.2  | 6.0  | 2.0  | 2.5  | ZFR2  | Homo sapiens zinc finger RNA binding protein 2 (ZFR2), transcript variant 2, mRNA [NM_001145640] | 23217 |

|              |      |      |      |       |         |                                                                                          |       |
|--------------|------|------|------|-------|---------|------------------------------------------------------------------------------------------|-------|
| A_23_P125639 | 4.9  | 3.6  | 1.4  | 2.3   | ZFX     | Homo sapiens zinc finger protein, X-linked (ZFX), transcript variant 1, mRNA [NM_003410] | 7543  |
| A_24_P290527 | 1.0  | 2.6  | -1.3 | 1.5   | ZFX     | Homo sapiens zinc finger protein, X-linked (ZFX), transcript variant 1, mRNA [NM_003410] | 7543  |
| A_23_P65930  | -1.5 | -1.4 | -1.7 | -79.9 | ZFYVE19 | Homo sapiens zinc finger, FYVE domain containing 19 (ZFYVE19), mRNA [NM_001077268]       | 84936 |
| A_23_P315872 | 1.6  | 2.2  | 1.9  | 1.9   | ZFYVE20 | Homo sapiens zinc finger, FYVE domain containing 20 (ZFYVE20), mRNA [NM_022340]          | 64145 |



|              |     |      |      |      |         |                                                                                                               |       |
|--------------|-----|------|------|------|---------|---------------------------------------------------------------------------------------------------------------|-------|
| A_24_P85322  | 1.7 | -9.1 | 1.7  | 1.1  | ZFYVE26 | Homo sapiens zinc finger, FYVE domain containing 26, mRNA (cDNA clone IMAGE:3836316), partial cds. [BC008927] | 23503 |
| A_32_P104746 | 2.6 | 2.6  | 2.3  | 2.4  | ZFYVE28 | Homo sapiens zinc finger, FYVE domain containing 28 (ZFYVE28), transcript variant 2, mRNA [NM_020972]         | 57732 |
| A_23_P302914 | 1.1 | 1.0  | -1.0 | -5.4 | ZFYVE28 | Homo sapiens zinc finger, FYVE domain containing 28 (ZFYVE28), transcript variant 2, mRNA [NM_020972]         | 57732 |

|              |      |      |      |      |       |                                                                                                         |        |
|--------------|------|------|------|------|-------|---------------------------------------------------------------------------------------------------------|--------|
| A_23_P49145  | 1.6  | -1.2 | 2.0  | 1.1  | ZG16  | Homo sapiens zymogen granule protein 16 homolog (rat) (ZG16), mRNA [NM_152338]                          | 653808 |
| A_23_P218654 | 3.1  | 2.6  | 2.1  | 2.0  | ZGPAT | Homo sapiens zinc finger, CCCH-type with G patch domain (ZGPAT), transcript variant 1, mRNA [NM_032527] | 84619  |
| A_24_P57700  | 14.8 | 12.1 | 2.7  | 12.0 | ZHX3  | Homo sapiens zinc fingers and homeoboxes 3 (ZHX3), mRNA [NM_015035]                                     | 23051  |
| A_24_P217306 | -3.0 | -1.2 | -1.6 | -1.7 | ZIC4  | Homo sapiens Zic family member 4 (ZIC4), transcript variant 3, mRNA [NM_032153]                         | 84107  |

|              |      |      |     |      |         |                                                                                                           |        |
|--------------|------|------|-----|------|---------|-----------------------------------------------------------------------------------------------------------|--------|
| A_24_P270345 | -2.2 | 1.1  | 2.0 | 1.1  | ZIC5    | Homo sapiens Zic family member 5 (ZIC5), mRNA [NM_033132]                                                 | 85416  |
| A_32_P219942 | 1.0  | 1.0  | 2.2 | 1.0  | ZIC5    | Homo sapiens Zic family member 5 (ZIC5), mRNA [NM_033132]                                                 | 85416  |
| A_23_P344281 | 1.2  | 1.2  | 3.8 | 1.0  | ZIK1    | Homo sapiens zinc finger protein interacting with K protein 1 homolog (mouse) (ZIK1), mRNA [NM_001010879] | 284307 |
| A_23_P94063  | -1.0 | -4.6 | 2.2 | -1.0 | ZKSCAN1 | zinc finger with KRAB and SCAN domains 1 [Source:HGNC Symbol;Acc:13101] [ENST00000482979]                 | 7586   |

|              |     |      |       |      |         |                                                                                                               |        |
|--------------|-----|------|-------|------|---------|---------------------------------------------------------------------------------------------------------------|--------|
| A_23_P168019 | 1.0 | 1.1  | -11.9 | -3.9 | ZKSCAN3 | Homo sapiens zinc finger with KRAB and SCAN domains 3 (ZKSCAN3), transcript variant 2, mRNA [NM_024493]       | 80317  |
| A_24_P930314 | 1.4 | -1.0 | -2.5  | -1.1 | ZKSCAN4 | Homo sapiens cDNA FLJ32136 fis, clone PEBLM2000395, moderately similar to ZINC FINGER PROTEIN 165. [AK056698] | 387032 |
| A_32_P164593 | 1.0 | 1.0  | -3.9  | -1.0 | ZMAT4   | Homo sapiens zinc finger, matrin-type 4 (ZMAT4), transcript variant 1, mRNA [NM_024645]                       | 79698  |

|              |      |      |      |      |       |                                                                                      |       |
|--------------|------|------|------|------|-------|--------------------------------------------------------------------------------------|-------|
| A_23_P314276 | -2.3 | -1.5 | 1.7  | 1.1  | ZMIZ1 | zinc finger, MIZ-type containing 1 [Source:HGNC Symbol;Acc:16493] [ENST00000478357]  | 57178 |
| A_23_P99405  | -1.2 | 1.8  | -2.4 | 1.6  | ZMYM2 | Homo sapiens zinc finger, MYM-type 2 (ZMYM2), transcript variant 1, mRNA [NM_003453] | 7750  |
| A_23_P137073 | 1.3  | 1.2  | -2.9 | 1.1  | ZMYM3 | Homo sapiens zinc finger, MYM-type 3 (ZMYM3), transcript variant 2, mRNA [NM_005096] | 9203  |
| A_24_P16815  | -4.1 | -6.9 | -4.9 | -4.5 | ZMYM3 | Homo sapiens zinc finger, MYM-type 3 (ZMYM3), transcript variant 2, mRNA [NM_005096] | 9203  |

|              |      |      |      |      |         |                                                                                         |       |
|--------------|------|------|------|------|---------|-----------------------------------------------------------------------------------------|-------|
| A_32_P141257 | 2.8  | 2.7  | 2.4  | 1.9  | ZMYM5   | Homo sapiens zinc finger, MYM-type 5 (ZMYM5), transcript variant 3, mRNA [NM_001142684] | 9205  |
| A_24_P321634 | -3.7 | -1.2 | 3.8  | -1.2 | ZMYM5   | Homo sapiens zinc finger, MYM-type 5 (ZMYM5), transcript variant 1, mRNA [NM_001039650] | 9205  |
| A_24_P110213 | -1.0 | -8.1 | -2.3 | -1.0 | ZMYM5   | Homo sapiens zinc finger, MYM-type 5 (ZMYM5), transcript variant 3, mRNA [NM_001142684] | 9205  |
| A_23_P29663  | 1.4  | 1.2  | -4.8 | -1.7 | ZMYND10 | Homo sapiens zinc finger, MYND-type containing 10 (ZMYND10), mRNA [NM_015896]           | 51364 |

|              |      |      |      |      |         |                                                                                                     |        |
|--------------|------|------|------|------|---------|-----------------------------------------------------------------------------------------------------|--------|
| A_24_P201323 | 1.2  | 3.1  | 1.6  | -1.2 | ZMYND11 | Homo sapiens zinc finger, MYND-type containing 11 (ZMYND11), transcript variant 1, mRNA [NM_006624] | 10771  |
| A_24_P158385 | 3.3  | 1.7  | 3.3  | 2.7  | ZMYND19 | Homo sapiens zinc finger, MYND-type containing 19 (ZMYND19), mRNA [NM_138462]                       | 116225 |
| A_24_P926432 | -1.0 | -1.0 | -2.8 | 1.6  | ZMYND8  | zinc finger, MYND-type containing 8 [Source:HGNC Symbol;Acc:9397] [ENST00000311275]                 | 23613  |

|              |      |       |      |      |        |                                                                                     |        |
|--------------|------|-------|------|------|--------|-------------------------------------------------------------------------------------|--------|
| A_24_P151325 | 2.2  | 2.0   | 1.3  | 12.0 | ZNF100 | Homo sapiens zinc finger protein 100 (ZNF100), mRNA [NM_173531]                     | 163227 |
| A_23_P215806 | -1.8 | -55.6 | -4.2 | -6.1 | ZNF117 | Homo sapiens zinc finger protein 117 (ZNF117), mRNA [NM_015852]                     | 51351  |
| A_23_P31335  | -1.7 | -1.4  | -2.2 | 1.1  | ZNF12  | Homo sapiens zinc finger protein 12 (ZNF12), transcript variant 1, mRNA [NM_016265] | 7559   |
| A_24_P337774 | 1.1  | -2.1  | -1.1 | -1.1 | ZNF12  | Homo sapiens zinc finger protein 12 (ZNF12), transcript variant 1, mRNA [NM_016265] | 7559   |



|              |      |      |      |      |        |                                                                                          |      |
|--------------|------|------|------|------|--------|------------------------------------------------------------------------------------------|------|
| A_32_P875758 | 1.2  | 1.2  | 1.2  | -2.9 | ZNF124 | Homo sapiens zinc finger protein 124 (ZNF124), transcript variant 2, mRNA [NM_001243740] | 7678 |
| A_23_P325661 | -1.1 | -1.1 | -3.3 | -1.2 | ZNF134 | Homo sapiens zinc finger protein 134 (ZNF134), mRNA [NM_003435]                          | 7693 |
| A_23_P147121 | -1.2 | -1.2 | -1.3 | -4.6 | ZNF136 | Homo sapiens zinc finger protein 136 (ZNF136), mRNA [NM_003437]                          | 7695 |
| A_23_P67312  | 1.4  | -4.3 | 1.4  | 5.6  | ZNF136 | Homo sapiens zinc finger protein 136 (ZNF136), mRNA [NM_003437]                          | 7695 |
| A_23_P388867 | 2.2  | -2.8 | 1.6  | 2.2  | ZNF141 | Human zinc finger protein (ZNF141) mRNA, complete cds. [L15309]                          | 7700 |

|              |      |      |      |      |        |                                                                                       |      |
|--------------|------|------|------|------|--------|---------------------------------------------------------------------------------------|------|
| A_24_P402836 | 38.8 | 63.4 | 10.5 | 35.3 | ZNF141 | Homo sapiens zinc finger protein 141 (ZNF141), mRNA [NM_003441]                       | 7700 |
| A_23_P51051  | 1.1  | -1.7 | -2.3 | -1.0 | ZNF142 | Homo sapiens zinc finger protein 142 (ZNF142), mRNA [NM_001105537]                    | 7701 |
| A_24_P206736 | 1.5  | -8.1 | 1.8  | -1.5 | ZNF143 | Homo sapiens zinc finger protein 143 (ZNF143), mRNA [NM_003442]                       | 7702 |
| A_24_P159845 | 5.2  | 3.7  | 2.0  | 3.5  | ZNF146 | Homo sapiens zinc finger protein 146 (ZNF146), transcript variant 1, mRNA [NM_007145] | 7705 |
| A_32_P131050 | 5.8  | 1.8  | 6.6  | 3.5  | ZNF148 | Homo sapiens zinc finger protein 148 (ZNF148), mRNA [NM_021964]                       | 7707 |

|              |      |     |      |      |        |                                                                                        |       |
|--------------|------|-----|------|------|--------|----------------------------------------------------------------------------------------|-------|
| A_23_P84910  | 2.3  | 8.9 | 6.5  | 3.6  | ZNF157 | Homo sapiens zinc finger protein 157 (ZNF157), mRNA [NM_003446]                        | 7712  |
| A_23_P168864 | -1.6 | 1.2 | 3.7  | 2.4  | ZNF16  | Homo sapiens zinc finger protein 16 (ZNF16), transcript variant 2, mRNA [NM_001029976] | 7564  |
| A_24_P401241 | -2.6 | 1.1 | 1.3  | 1.6  | ZNF160 | Homo sapiens zinc finger protein 160 (ZNF160), transcript variant 2, mRNA [NM_198893]  | 90338 |
| A_24_P16950  | 2.8  | 2.9 | 18.7 | -1.7 | ZNF160 | Homo sapiens zinc finger protein 160 (ZNF160), transcript variant 2, mRNA [NM_198893]  | 90338 |

|              |      |      |      |      |        |                                                                                          |        |
|--------------|------|------|------|------|--------|------------------------------------------------------------------------------------------|--------|
| A_24_P409451 | 2.9  | 2.2  | 2.1  | -4.3 | ZNF167 | Homo sapiens zinc finger protein 167 (ZNF167), transcript variant 2, mRNA [NM_025169]    | 55888  |
| A_23_P164706 | 1.9  | -1.5 | -3.0 | 1.0  | ZNF177 | Homo sapiens zinc finger protein 177 (ZNF177), transcript variant 3, mRNA [NM_003451]    | 7730   |
| A_23_P89921  | 3.5  | 3.3  | 3.1  | 1.1  | ZNF180 | Homo sapiens zinc finger protein 180 (ZNF180), mRNA [NM_013256]                          | 7733   |
| A_23_P50735  | -1.2 | -1.1 | -1.3 | -5.3 | ZNF181 | Homo sapiens zinc finger protein 181 (ZNF181), transcript variant 1, mRNA [NM_001029997] | 339318 |

|              |      |      |      |      |        |                                                                                                       |      |
|--------------|------|------|------|------|--------|-------------------------------------------------------------------------------------------------------|------|
| A_23_P11025  | 1.5  | 1.6  | 3.8  | 1.1  | ZNF185 | Homo sapiens zinc finger protein 185 (LIM domain) (ZNF185), transcript variant 1, mRNA [NM_001178106] | 7739 |
| A_23_P145244 | -4.4 | -1.1 | -1.2 | -1.1 | ZNF187 | Homo sapiens zinc finger protein 187 (ZNF187), transcript variant a, mRNA [NM_001023560]              | 7741 |
| A_23_P500905 | -2.7 | 1.1  | 1.2  | -1.4 | ZNF19  | Homo sapiens zinc finger protein 19 (ZNF19), mRNA [NM_006961]                                         | 7567 |
| A_23_P214529 | -1.6 | -1.0 | -2.1 | 1.1  | ZNF192 | Homo sapiens zinc finger protein 192 (ZNF192), mRNA [NM_006298]                                       | 7745 |

|              |      |      |       |      |        |                                                                                       |       |
|--------------|------|------|-------|------|--------|---------------------------------------------------------------------------------------|-------|
| A_23_P122464 | 2.6  | 2.7  | 1.6   | 2.2  | ZNF193 | Homo sapiens zinc finger protein 193 (ZNF193), transcript variant 2, mRNA [NM_006299] | 7746  |
| A_24_P385148 | -3.3 | -1.5 | -35.1 | -1.7 | ZNF197 | Homo sapiens zinc finger protein 197 (ZNF197), transcript variant 1, mRNA [NM_006991] | 10168 |
| A_24_P28845  | -1.5 | -9.6 | -1.6  | 1.1  | ZNF2   | Homo sapiens zinc finger protein 2 (ZNF2), transcript variant 1, mRNA [NM_021088]     | 7549  |
| A_23_P152356 | 2.6  | 2.5  | 2.4   | 2.0  | ZNF200 | Homo sapiens zinc finger protein 200 (ZNF200), transcript variant 1, mRNA [NM_003454] | 7752  |

|              |      |      |       |      |        |                                                                                       |       |
|--------------|------|------|-------|------|--------|---------------------------------------------------------------------------------------|-------|
| A_24_P56689  | 2.8  | -2.1 | 2.3   | 1.4  | ZNF205 | Homo sapiens zinc finger protein 205 (ZNF205), transcript variant 1, mRNA [NM_003456] | 7755  |
| A_24_P116766 | -2.3 | -1.0 | -1.1  | -1.0 | ZNF207 | zinc finger protein 207 [Source:HGNC Symbol;Acc:12998] [ENST00000394670]              | 7756  |
| A_24_P296765 | -3.2 | 1.8  | -24.9 | -1.3 | ZNF211 | Homo sapiens zinc finger protein 211 (ZNF211), transcript variant 2, mRNA [NM_198855] | 10520 |
| A_24_P364845 | 1.7  | -1.3 | -3.0  | 1.4  | ZNF213 | Homo sapiens zinc finger protein 213 (ZNF213), transcript variant 1, mRNA [NM_004220] | 7760  |

|              |      |      |      |      |        |                                                                                       |      |
|--------------|------|------|------|------|--------|---------------------------------------------------------------------------------------|------|
| A_23_P127840 | -1.2 | -3.2 | -2.9 | -2.6 | ZNF214 | Homo sapiens zinc finger protein 214 (ZNF214), mRNA [NM_013249]                       | 7761 |
| A_24_P318002 | 1.2  | -1.4 | -2.7 | -1.0 | ZNF215 | Homo sapiens zinc finger protein 215 (ZNF215), mRNA [NM_013250]                       | 7762 |
| A_23_P384512 | 50.2 | 88.7 | 23.4 | 47.3 | ZNF22  | Homo sapiens zinc finger protein 22 (KOX 15) (ZNF22), mRNA [NM_006963]                | 7570 |
| A_23_P90320  | -1.2 | -1.5 | 1.0  | -5.0 | ZNF221 | Homo sapiens zinc finger protein 221 (ZNF221), mRNA [NM_013359]                       | 7638 |
| A_23_P125042 | -1.4 | -1.5 | -1.0 | -3.4 | ZNF222 | Homo sapiens zinc finger protein 222 (ZNF222), transcript variant 2, mRNA [NM_013360] | 7673 |



|              |      |      |      |       |        |                                                                                          |      |
|--------------|------|------|------|-------|--------|------------------------------------------------------------------------------------------|------|
| A_23_P218517 | -6.1 | -1.8 | -1.8 | -1.5  | ZNF222 | Homo sapiens zinc finger protein 222 (ZNF222), transcript variant 2, mRNA [NM_013360]    | 7673 |
| A_23_P10885  | -2.5 | -1.1 | -1.2 | -1.2  | ZNF224 | zinc finger protein 224 [Source:HGNC Symbol;Acc:13017] [ENST00000336976]                 | 7767 |
| A_23_P395555 | -1.0 | -1.0 | -3.1 | -1.0  | ZNF226 | Homo sapiens zinc finger protein 226 (ZNF226), transcript variant 1, mRNA [NM_001032372] | 7769 |
| A_24_P930347 | 1.0  | -1.0 | -1.1 | -11.2 | ZNF226 | Homo sapiens zinc finger protein 226 (ZNF226), transcript variant 1, mRNA [NM_001032372] | 7769 |

|              |      |      |      |      |        |                                                                            |      |
|--------------|------|------|------|------|--------|----------------------------------------------------------------------------|------|
| A_24_P113287 | -1.4 | 1.0  | -2.9 | 1.0  | ZNF229 | Homo sapiens zinc finger protein 229 (ZNF229), mRNA [NM_014518]            | 7772 |
| A_23_P89073  | 1.0  | 1.0  | -1.5 | -3.1 | ZNF23  | Homo sapiens zinc finger protein 23 (KOX 16) (ZNF23), mRNA [NM_145911]     | 7571 |
| A_24_P935125 | 2.3  | 1.4  | 1.0  | 1.0  | ZNF23  | Homo sapiens clone L3-15 zinc finger protein mRNA, partial cds. [AF024709] | 7571 |
| A_24_P147252 | -2.7 | -1.1 | -1.9 | -1.7 | ZNF23  | Homo sapiens zinc finger protein 23 (KOX 16) (ZNF23), mRNA [NM_145911]     | 7571 |
| A_23_P4294   | 1.1  | -1.1 | -1.3 | -2.2 | ZNF232 | Homo sapiens zinc finger protein 232 (ZNF232), mRNA [NM_014519]            | 7775 |

|              |      |       |      |      |        |                                                                                   |       |
|--------------|------|-------|------|------|--------|-----------------------------------------------------------------------------------|-------|
| A_24_P151148 | -1.0 | -18.6 | -1.1 | -1.1 | ZNF235 | Homo sapiens zinc finger protein 235, mRNA (cDNA clone IMAGE:3605615). [BC002663] | 9310  |
| A_23_P208325 | -1.6 | 1.0   | -1.6 | -2.1 | ZNF235 | Homo sapiens zinc finger protein 235 (ZNF235), mRNA [NM_004234]                   | 9310  |
| A_24_P110719 | -1.4 | -2.7  | 1.8  | -4.1 | ZNF236 | Homo sapiens zinc finger protein 236 (ZNF236), mRNA [NM_007345]                   | 7776  |
| A_23_P35343  | 1.7  | 1.7   | 2.0  | 1.0  | ZNF248 | Homo sapiens zinc finger protein 248 (ZNF248), mRNA [NM_021045]                   | 57209 |

|              |     |      |      |      |        |                                                                                       |        |
|--------------|-----|------|------|------|--------|---------------------------------------------------------------------------------------|--------|
| A_24_P205019 | 2.5 | 2.4  | 2.3  | 2.7  | ZNF250 | Homo sapiens zinc finger protein 250 (ZNF250), transcript variant 1, mRNA [NM_021061] | 58500  |
| A_23_P412186 | 1.1 | -8.5 | -1.0 | -1.1 | ZNF252 | Homo sapiens zinc finger protein 252 (ZNF252), non-coding RNA [NR_023392]             | 286101 |
| A_24_P22981  | 1.9 | 1.4  | 1.0  | 2.0  | ZNF253 | Homo sapiens zinc finger protein 253 (ZNF253), mRNA [NM_021047]                       | 56242  |
| A_32_P144908 | 1.5 | -1.3 | -2.1 | -2.3 | ZNF254 | Homo sapiens zinc finger protein 254 (ZNF254), mRNA [NM_0203282]                      | 9534   |

|              |      |      |      |      |        |                                                                 |        |
|--------------|------|------|------|------|--------|-----------------------------------------------------------------|--------|
| A_24_P298545 | 2.1  | 2.1  | -1.4 | 2.0  | ZNF257 | Homo sapiens zinc finger protein 257 (ZNF257), mRNA [NM_033468] | 113835 |
| A_23_P16632  | -1.8 | -7.4 | -1.0 | -1.0 | ZNF257 | Homo sapiens zinc finger protein 257 (ZNF257), mRNA [NM_033468] | 113835 |
| A_23_P128060 | 3.3  | 2.1  | 2.0  | 2.1  | ZNF26  | Homo sapiens zinc finger protein 26 (ZNF26), mRNA [NM_019591]   | 7574   |
| A_23_P140978 | -2.0 | -2.4 | -2.5 | -2.5 | ZNF263 | Homo sapiens zinc finger protein 263 (ZNF263), mRNA [NM_005741] | 10127  |
| A_24_P335901 | 1.7  | -1.1 | -2.1 | 1.0  | ZNF266 | Homo sapiens zinc finger protein 266 (ZNF266), mRNA [NM_006631] | 10781  |

|              |       |      |      |      |        |                                                                                                 |       |
|--------------|-------|------|------|------|--------|-------------------------------------------------------------------------------------------------|-------|
| A_23_P107763 | -6.2  | 1.1  | -1.0 | 1.1  | ZNF266 | Homo sapiens zinc finger protein 266 (ZNF266), mRNA [NM_006631]                                 | 10781 |
| A_23_P66260  | -1.1  | -1.2 | -4.7 | -1.3 | ZNF267 | Homo sapiens zinc finger protein 267 (ZNF267), transcript variant 498723, mRNA [NM_003414]      | 10308 |
| A_32_P42780  | -12.0 | 1.1  | -1.6 | -1.6 | ZNF271 | Homo sapiens zinc finger protein 271 (ZNF271), transcript variant 1, non-coding RNA [NR_024565] | 10778 |
| A_24_P58549  | -1.2  | -9.9 | -1.0 | 1.0  | ZNF273 | Homo sapiens zinc finger protein 273 (ZNF273), transcript variant 1, mRNA [NM_021148]           | 10793 |

|              |      |       |     |     |        |                                                                                             |       |
|--------------|------|-------|-----|-----|--------|---------------------------------------------------------------------------------------------|-------|
| A_24_P218001 | -6.0 | 1.0   | 1.0 | 1.0 | ZNF273 | Homo sapiens zinc finger protein 273 (ZNF273), transcript variant 1, mRNA [NM_021148]       | 10793 |
| A_23_P153251 | 1.1  | -16.9 | 1.0 | 1.1 | ZNF274 | Homo sapiens zinc finger protein 274 (ZNF274), transcript variant ZNF274c, mRNA [NM_133502] | 10782 |
| A_24_P194748 | 1.9  | 1.8   | 1.9 | 3.5 | ZNF275 | Homo sapiens zinc finger protein 275 (ZNF275), mRNA [NM_001080485]                          | 10838 |
| A_24_P133671 | 1.1  | 1.1   | 1.0 | 5.2 | ZNF276 | Homo sapiens zinc finger protein 276 (ZNF276), transcript variant b, mRNA [NM_152287]       | 92822 |

|              |       |      |      |      |         |                                                                                     |        |
|--------------|-------|------|------|------|---------|-------------------------------------------------------------------------------------|--------|
| A_24_P243776 | 3.0   | 2.9  | 2.6  | 1.3  | ZNF277  | Homo sapiens zinc finger protein 277 (ZNF277), mRNA [NM_021994]                     | 11179  |
| A_24_P282043 | -15.3 | -1.0 | -1.1 | -1.0 | ZNF28   | Homo sapiens zinc finger protein 28 (ZNF28), transcript variant 1, mRNA [NM_006969] | 7576   |
| A_23_P402134 | 2.4   | 1.5  | -1.7 | -1.2 | ZNF280B | Homo sapiens zinc finger protein 280B (ZNF280B), mRNA [NM_080764]                   | 140883 |
| A_23_P311087 | 2.5   | 3.7  | 1.8  | 2.1  | ZNF281  | Homo sapiens zinc finger protein 281 (ZNF281), mRNA [NM_012482]                     | 23528  |
| A_23_P428468 | 1.1   | -5.8 | 1.0  | 1.0  | ZNF292  | Homo sapiens zinc finger protein 292 (ZNF292), mRNA [NM_015021]                     | 23036  |



|              |      |      |      |      |            |                                                                                                                  |        |
|--------------|------|------|------|------|------------|------------------------------------------------------------------------------------------------------------------|--------|
| A_32_P15958  | 1.0  | -1.0 | -3.8 | 1.0  | ZNF295-AS1 | Homo sapiens ZNF295 antisense RNA 1 (non-protein coding) (ZNF295-AS1), non-coding RNA [NR_027273]                | 150142 |
| A_23_P16058  | -1.9 | -1.0 | -4.3 | 1.5  | ZNF296     | Homo sapiens zinc finger protein 296 (ZNF296), mRNA [NM_145288]                                                  | 162979 |
| A_23_P110699 | -2.7 | -2.5 | -8.4 | -9.9 | ZNF300     | Homo sapiens zinc finger protein 300 (ZNF300), transcript variant 2, mRNA [NM_052860]                            | 91975  |
| A_24_P159837 | -1.5 | 1.0  | -2.2 | -1.5 | ZNF302     | Homo sapiens mRNA for PREDICTED: similar to regulator of sex-limitation candidate 11 variant protein. [AB209226] | 55900  |

|              |      |      |      |      |        |                                                                                       |        |
|--------------|------|------|------|------|--------|---------------------------------------------------------------------------------------|--------|
| A_24_P228266 | -1.1 | 1.1  | -2.4 | 1.1  | ZNF304 | Homo sapiens zinc finger protein 304 (ZNF304), mRNA [NM_020657]                       | 57343  |
| A_23_P208288 | -2.2 | -1.0 | -1.1 | -1.0 | ZNF304 | Homo sapiens zinc finger protein 304 (ZNF304), mRNA [NM_020657]                       | 57343  |
| A_24_P152911 | 1.0  | -1.0 | -1.0 | -8.8 | ZNF311 | Homo sapiens zinc finger protein 311 (ZNF311), mRNA [NM_001010877]                    | 282890 |
| A_23_P38813  | -1.1 | -1.1 | -2.6 | -1.1 | ZNF320 | Homo sapiens zinc finger protein 320 (ZNF320), mRNA [NM_207333]                       | 162967 |
| A_24_P83437  | 1.1  | -3.5 | -1.6 | 1.0  | ZNF326 | Homo sapiens zinc finger protein 326 (ZNF326), transcript variant 3, mRNA [NM_182975] | 284695 |

|              |      |      |      |      |        |                                                                                       |       |
|--------------|------|------|------|------|--------|---------------------------------------------------------------------------------------|-------|
| A_23_P433690 | 1.0  | -1.0 | -6.0 | -1.1 | ZNF331 | Homo sapiens zinc finger protein 331 (ZNF331), transcript variant 1, mRNA [NM_018555] | 55422 |
| A_23_P5221   | 3.0  | 2.4  | -1.3 | 2.6  | ZNF333 | Homo sapiens zinc finger protein 333 (ZNF333), mRNA [NM_032433]                       | 84449 |
| A_23_P91250  | -7.8 | -1.4 | -1.1 | -1.1 | ZNF334 | Homo sapiens zinc finger protein 334 (ZNF334), transcript variant 2, mRNA [NM_199441] | 55713 |
| A_23_P17382  | 4.0  | 3.8  | 3.7  | 3.7  | ZNF335 | Homo sapiens zinc finger protein 335 (ZNF335), mRNA [NM_022095]                       | 63925 |

|              |      |      |      |      |        |                                                                                       |       |
|--------------|------|------|------|------|--------|---------------------------------------------------------------------------------------|-------|
| A_23_P154758 | 1.4  | 1.7  | -3.0 | -1.1 | ZNF337 | Homo sapiens zinc finger protein 337 (ZNF337), mRNA [NM_015655]                       | 26152 |
| A_23_P430852 | 1.0  | -1.0 | -1.4 | -4.8 | ZNF33A | zinc finger protein 33A [Source:HGNC Symbol;Acc:13096] [ENST00000277672]              | 7581  |
| A_24_P212127 | 2.8  | 2.7  | 2.5  | 2.7  | ZNF33A | Homo sapiens zinc finger protein 33A (ZNF33A), transcript variant 1, mRNA [NM_006954] | 7581  |
| A_32_P61657  | 1.0  | -1.0 | -3.8 | 1.0  | ZNF33B | Homo sapiens zinc finger protein 33B (ZNF33B), mRNA [NM_006955]                       | 7582  |
| A_23_P17570  | -6.0 | -1.1 | -1.2 | -1.5 | ZNF341 | Homo sapiens zinc finger protein 341 (ZNF341), mRNA [NM_032819]                       | 84905 |

|              |       |      |      |      |        |                                                                                       |       |
|--------------|-------|------|------|------|--------|---------------------------------------------------------------------------------------|-------|
| A_23_P17562  | -23.7 | -2.5 | -2.3 | -2.8 | ZNF341 | Homo sapiens zinc finger protein 341 (ZNF341), mRNA [NM_032819]                       | 84905 |
| A_23_P357248 | -1.8  | -9.5 | -1.9 | -1.7 | ZNF343 | Homo sapiens zinc finger protein 343 (ZNF343), mRNA [NM_024325]                       | 79175 |
| A_23_P39154  | 6.1   | 1.9  | -2.5 | 1.7  | ZNF345 | Homo sapiens zinc finger protein 345 (ZNF345), transcript variant 1, mRNA [NM_003419] | 25850 |
| A_23_P400887 | -1.0  | -1.7 | -3.2 | 1.1  | ZNF346 | Homo sapiens zinc finger protein 346 (ZNF346), mRNA [NM_012279]                       | 23567 |
| A_23_P400884 | -1.3  | 2.4  | -2.6 | 1.4  | ZNF346 | Homo sapiens zinc finger protein 346 (ZNF346), mRNA [NM_012279]                       | 23567 |

|              |      |      |      |      |        |                                                                 |        |
|--------------|------|------|------|------|--------|-----------------------------------------------------------------|--------|
| A_23_P78458  | 2.2  | 2.3  | 2.3  | 2.3  | ZNF350 | Homo sapiens zinc finger protein 350 (ZNF350), mRNA [NM_021632] | 59348  |
| A_24_P19175  | -3.3 | 1.2  | 1.4  | 1.1  | ZNF358 | Homo sapiens zinc finger protein 358 (ZNF358), mRNA [NM_018083] | 140467 |
| A_23_P137543 | 1.3  | 2.0  | 3.0  | -1.3 | ZNF362 | Homo sapiens zinc finger protein 362 (ZNF362), mRNA [NM_152493] | 149076 |
| A_32_P183218 | -1.3 | 2.0  | 1.9  | 2.0  | ZNF367 | Homo sapiens zinc finger protein 367 (ZNF367), mRNA [NM_153695] | 195828 |
| A_23_P410625 | -9.5 | -1.1 | -1.2 | -1.1 | ZNF367 | Homo sapiens zinc finger protein 367 (ZNF367), mRNA [NM_153695] | 195828 |

|              |      |      |      |      |         |                                                                                          |        |
|--------------|------|------|------|------|---------|------------------------------------------------------------------------------------------|--------|
| A_24_P239668 | -2.8 | -1.0 | -1.0 | -1.1 | ZNF37A  | Homo sapiens zinc finger protein 37A (ZNF37A), transcript variant 1, mRNA [NM_001007094] | 7587   |
| A_23_P319013 | -1.2 | -1.2 | -4.0 | -1.4 | ZNF383  | Homo sapiens zinc finger protein 383 (ZNF383), mRNA [NM_152604]                          | 163087 |
| A_24_P403734 | -2.7 | 1.2  | -1.5 | -1.0 | ZNF385A | Homo sapiens zinc finger protein 385A (ZNF385A), transcript variant 3, mRNA [NM_015481]  | 25946  |
| A_23_P334857 | -1.0 | -2.6 | -1.0 | -1.0 | ZNF385B | Homo sapiens zinc finger protein 385B (ZNF385B), transcript variant 1, mRNA [NM_152520]  | 151126 |

|              |      |       |      |      |         |                                                                           |        |
|--------------|------|-------|------|------|---------|---------------------------------------------------------------------------|--------|
| A_24_P917306 | -1.1 | -29.7 | -1.1 | -1.1 | ZNF385D | zinc finger protein 385D [Source:HGNC Symbol;Acc:26191] [ENST00000494108] | 79750  |
| A_23_P157416 | 1.1  | 1.5   | -2.2 | 1.1  | ZNF394  | Homo sapiens zinc finger protein 394 (ZNF394), mRNA [NM_032164]           | 84124  |
| A_24_P153680 | 1.0  | -6.9  | -1.9 | -1.3 | ZNF395  | Homo sapiens zinc finger protein 395 (ZNF395), mRNA [NM_018660]           | 55893  |
| A_24_P67918  | -1.1 | -1.1  | -2.1 | -1.3 | ZNF396  | Homo sapiens zinc finger protein 396 (ZNF396), mRNA [NM_145756]           | 252884 |
| A_24_P393565 | -2.2 | 1.1   | -1.1 | -1.8 | ZNF396  | zinc finger protein 396 [Source:HGNC Symbol;Acc:18824] [ENST00000399057]  | 252884 |



|              |      |      |      |      |        |                                                                                          |        |
|--------------|------|------|------|------|--------|------------------------------------------------------------------------------------------|--------|
| A_23_P90333  | -2.2 | -1.0 | -1.0 | -2.0 | ZNF404 | Homo sapiens zinc finger protein 404 (ZNF404), mRNA [NM_001033719]                       | 342908 |
| A_23_P380954 | 2.3  | 2.2  | -1.0 | 1.3  | ZNF407 | Homo sapiens zinc finger protein 407 (ZNF407), transcript variant 2, mRNA [NM_001146189] | 55628  |
| A_23_P32722  | -1.3 | -1.1 | -2.7 | -1.3 | ZNF408 | Homo sapiens zinc finger protein 408 (ZNF408), transcript variant 1, mRNA [NM_024741]    | 79797  |
| A_23_P45234  | 28.5 | 32.3 | 26.0 | 25.9 | ZNF41  | Homo sapiens zinc finger protein 41 (ZNF41), transcript variant 2, mRNA [NM_153380]      | 7592   |

|              |      |       |      |      |        |                                                                                       |        |
|--------------|------|-------|------|------|--------|---------------------------------------------------------------------------------------|--------|
| A_23_P27424  | 1.2  | 1.6   | -2.1 | -1.0 | ZNF418 | Homo sapiens zinc finger protein 418 (ZNF418), mRNA [NM_133460]                       | 147686 |
| A_24_P941166 | -1.1 | -17.1 | 1.1  | -1.2 | ZNF425 | Homo sapiens zinc finger protein 425 (ZNF425), mRNA [NM_001001661]                    | 155054 |
| A_32_P106944 | -1.3 | -2.0  | -2.2 | -4.2 | ZNF429 | Homo sapiens zinc finger protein 429 (ZNF429), mRNA [NM_001001415]                    | 353088 |
| A_23_P5234   | -1.3 | -1.3  | -2.4 | -1.3 | ZNF43  | Homo sapiens zinc finger protein 43 (ZNF43), mRNA [NM_003423]                         | 7594   |
| A_23_P56298  | 1.1  | -19.6 | 1.1  | 1.0  | ZNF430 | Homo sapiens zinc finger protein 430 (ZNF430), transcript variant 1, mRNA [NM_025189] | 80264  |

|              |      |      |      |      |        |                                                                                  |        |
|--------------|------|------|------|------|--------|----------------------------------------------------------------------------------|--------|
| A_23_P39441  | -2.0 | 1.4  | -1.7 | 1.4  | ZNF431 | Homo sapiens zinc finger protein 431 (ZNF431), mRNA [NM_133473]                  | 170959 |
| A_23_P27649  | 1.3  | 1.2  | -2.1 | 1.2  | ZNF433 | Homo sapiens zinc finger protein 433 (ZNF433), mRNA [NM_001080411]               | 163059 |
| A_32_P728662 | 1.1  | 1.0  | 1.0  | -9.8 | ZNF44  | Homo sapiens zinc finger protein 44, mRNA (cDNA clone IMAGE:5202234). [BC032246] | 51710  |
| A_24_P914240 | -1.2 | 1.1  | -8.4 | 1.1  | ZNF44  | zinc finger protein 44 [Source:HGNC Symbol;Acc:13110] [ENST0000483826]           | 51710  |
| A_23_P67278  | 2.3  | -1.4 | 2.3  | 2.3  | ZNF443 | Homo sapiens zinc finger protein 443 (ZNF443), mRNA [NM_005815]                  | 10224  |

|              |      |      |      |     |        |                                                                 |        |
|--------------|------|------|------|-----|--------|-----------------------------------------------------------------|--------|
| A_23_P27767  | 2.0  | 3.0  | 1.8  | 1.4 | ZNF444 | Homo sapiens zinc finger protein 444 (ZNF444), mRNA [NM_018337] | 55311  |
| A_24_P126587 | -1.8 | -2.8 | -1.9 | 1.4 | ZNF445 | Homo sapiens zinc finger protein 445 (ZNF445), mRNA [NM_181489] | 353274 |
| A_23_P101272 | 2.7  | 1.1  | 1.9  | 1.3 | ZNF446 | Homo sapiens zinc finger protein 446 (ZNF446), mRNA [NM_017908] | 55663  |
| A_24_P349676 | 1.6  | 2.7  | -2.4 | 1.8 | ZNF446 | Homo sapiens zinc finger protein 446 (ZNF446), mRNA [NM_017908] | 55663  |
| A_23_P309865 | -1.0 | -3.0 | -2.0 | 1.0 | ZNF449 | Homo sapiens zinc finger protein 449 (ZNF449), mRNA [NM_152695] | 203523 |

|              |      |      |      |      |        |                                                                                       |        |
|--------------|------|------|------|------|--------|---------------------------------------------------------------------------------------|--------|
| A_24_P68415  | 1.0  | 1.0  | 1.7  | -2.2 | ZNF45  | Homo sapiens zinc finger protein 45 (ZNF45), mRNA [NM_003425]                         | 7596   |
| A_24_P320572 | 5.0  | -1.0 | -2.1 | -1.0 | ZNF451 | Homo sapiens zinc finger protein 451 (ZNF451), transcript variant 2, mRNA [NM_015555] | 26036  |
| A_23_P67424  | -1.0 | -1.1 | 4.7  | -1.0 | ZNF461 | Homo sapiens zinc finger protein 461 (ZNF461), mRNA [NM_153257]                       | 92283  |
| A_23_P60499  | -2.9 | -7.1 | -1.0 | 1.4  | ZNF462 | Homo sapiens zinc finger protein 462 (ZNF462), mRNA [NM_021224]                       | 58499  |
| A_24_P218074 | -6.8 | 1.3  | -1.0 | 1.1  | ZNF467 | Homo sapiens zinc finger protein 467 (ZNF467), mRNA [NM_207336]                       | 168544 |

|              |      |      |      |      |        |                                                                                       |        |
|--------------|------|------|------|------|--------|---------------------------------------------------------------------------------------|--------|
| A_24_P916718 | 1.8  | 1.5  | -1.5 | -3.2 | ZNF467 | Homo sapiens zinc finger protein 467 (ZNF467), mRNA [NM_207336]                       | 168544 |
| A_32_P116556 | -1.7 | -2.1 | -2.9 | -1.2 | ZNF469 | Homo sapiens zinc finger protein 469 (ZNF469), mRNA [NM_001127464]                    | 84627  |
| A_23_P417684 | 1.0  | -1.0 | -7.3 | -1.1 | ZNF471 | Homo sapiens mRNA for KIAA1396 protein, partial cds. [AB037817]                       | 57573  |
| A_23_P107942 | 1.1  | -9.6 | -1.9 | 1.9  | ZNF473 | Homo sapiens zinc finger protein 473 (ZNF473), transcript variant 1, mRNA [NM_015428] | 25888  |
| A_24_P16249  | 1.1  | -3.2 | -1.0 | 1.0  | ZNF479 | Homo sapiens zinc finger protein 479 (ZNF479), mRNA [NM_033273]                       | 90827  |

|              |      |      |      |       |        |                                                                                          |        |
|--------------|------|------|------|-------|--------|------------------------------------------------------------------------------------------|--------|
| A_24_P102362 | 2.7  | 1.4  | 1.8  | 1.6   | ZNF48  | Homo sapiens zinc finger protein 48 (ZNF48), transcript variant 3, mRNA [NM_001214909]   | 197407 |
| A_32_P226157 | -1.0 | -1.0 | -1.0 | -2.7  | ZNF484 | Homo sapiens cDNA, FLJ99658. [AK309617]                                                  | 83744  |
| A_23_P341700 | 1.0  | -1.0 | -1.1 | -11.3 | ZNF484 | Homo sapiens zinc finger protein 484 (ZNF484), transcript variant 2, mRNA [NM_001007101] | 83744  |
| A_24_P15062  | 7.0  | 6.7  | 6.3  | 6.6   | ZNF490 | Homo sapiens zinc finger protein 490 (ZNF490), mRNA [NM_020714]                          | 57474  |
| A_24_P194971 | 11.7 | 11.6 | 7.7  | 11.4  | ZNF492 | Homo sapiens zinc finger protein 492 (ZNF492), mRNA [NM_020855]                          | 57615  |

|              |      |      |       |      |        |                                                                                                                  |        |
|--------------|------|------|-------|------|--------|------------------------------------------------------------------------------------------------------------------|--------|
| A_23_P153855 | -1.0 | -2.3 | -1.1  | -1.0 | ZNF492 | Homo sapiens zinc finger protein 492 (ZNF492), mRNA [NM_020855]                                                  | 57615  |
| A_23_P354942 | -2.1 | -1.0 | -1.0  | 1.3  | ZNF493 | Homo sapiens zinc finger protein 493 (ZNF493), transcript variant 3, mRNA [NM_001076678]                         | 284443 |
| A_23_P319050 | 1.0  | 1.0  | -16.8 | -1.0 | ZNF493 | Homo sapiens zinc finger protein 493 (ZNF493), transcript variant 2, mRNA [NM_145326]                            | 284443 |
| A_24_P282261 | 1.0  | 1.0  | 1.0   | -3.3 | ZNF493 | Homo sapiens zinc finger protein 493, mRNA (cDNA clone IMAGE:4617832), with apparent retained intron. [BC022394] | 284443 |



|              |      |      |      |      |        |                                                                                |        |
|--------------|------|------|------|------|--------|--------------------------------------------------------------------------------|--------|
| A_24_P376787 | 3.4  | 5.1  | 2.1  | 3.0  | ZNF496 | Homo sapiens zinc finger protein 496 (ZNF496), mRNA [NM_032752]                | 84838  |
| A_23_P309246 | 1.3  | -3.2 | -1.2 | -2.5 | ZNF498 | Homo sapiens zinc finger protein 498 (ZNF498), mRNA [NM_145115]                | 221785 |
| A_32_P486443 | -2.1 | 1.0  | -1.3 | -1.2 | ZNF500 | Homo sapiens mRNA for KIAA0557 protein, partial cds. [AB011129]                | 26048  |
| A_23_P202484 | 2.1  | 1.6  | 2.1  | -1.5 | ZNF503 | Homo sapiens zinc finger protein 503 (ZNF503), mRNA [NM_032772]                | 84858  |
| A_23_P16609  | 1.8  | 2.1  | -1.4 | 2.3  | ZNF506 | Homo sapiens mRNA; cDNA DKFZp761G18121 (from clone DKFZp761G18121). [AL136548] | 440515 |

|              |      |      |      |      |         |                                                                                |        |
|--------------|------|------|------|------|---------|--------------------------------------------------------------------------------|--------|
| A_23_P16607  | -2.0 | -3.2 | -7.1 | -2.4 | ZNF506  | Homo sapiens mRNA; cDNA DKFZp761G18121 (from clone DKFZp761G18121). [AL136548] | 440515 |
| A_23_P374944 | -2.5 | 1.0  | -3.2 | 1.1  | ZNF507  | Homo sapiens mRNA for KIAA1084 protein, partial cds. [AB029007]                | 22847  |
| A_23_P28730  | 1.0  | 1.0  | -2.5 | -1.0 | ZNF512B | Homo sapiens zinc finger protein 512B (ZNF512B), mRNA [NM_020713]              | 57473  |
| A_23_P55606  | -2.9 | 1.3  | 1.2  | -1.0 | ZNF516  | Homo sapiens zinc finger protein 516 (ZNF516), mRNA [NM_014643]                | 9658   |
| A_24_P944320 | 1.1  | 1.9  | 2.0  | -2.0 | ZNF517  | Homo sapiens zinc finger protein 517 (ZNF517), mRNA [NM_213605]                | 340385 |

|              |      |      |      |      |        |                                                                                       |        |
|--------------|------|------|------|------|--------|---------------------------------------------------------------------------------------|--------|
| A_23_P328766 | 1.0  | -1.0 | 1.1  | -3.5 | ZNF519 | Homo sapiens zinc finger protein 519 (ZNF519), transcript variant 1, mRNA [NM_145287] | 162655 |
| A_32_P98348  | -9.2 | -1.8 | 1.0  | 1.1  | ZNF525 | Homo sapiens zinc finger protein 525 (ZNF525), non-coding RNA [NR_003699]             | 170958 |
| A_23_P435944 | -1.9 | -3.0 | -2.0 | -1.9 | ZNF530 | Homo sapiens mRNA for KIAA1508 protein, partial cds. [AB040941]                       | 348327 |
| A_23_P130811 | 1.0  | -1.0 | -1.1 | -3.3 | ZNF536 | Homo sapiens zinc finger protein 536 (ZNF536), mRNA [NM_014717]                       | 9745   |

|              |      |      |      |      |        |                                                                                       |        |
|--------------|------|------|------|------|--------|---------------------------------------------------------------------------------------|--------|
| A_23_P130876 | 2.5  | 2.5  | 1.6  | 3.0  | ZNF546 | Homo sapiens zinc finger protein 546 (ZNF546), mRNA [NM_178544]                       | 339327 |
| A_23_P4640   | 23.2 | 22.6 | 21.5 | 23.2 | ZNF548 | Homo sapiens zinc finger protein 548 (ZNF548), transcript variant 2, mRNA [NM_152909] | 147694 |
| A_24_P68019  | 1.0  | -4.6 | 1.0  | -1.0 | ZNF551 | Homo sapiens zinc finger protein 551 (ZNF551), mRNA [NM_138347]                       | 90233  |
| A_24_P693448 | -1.5 | -1.2 | -1.2 | 2.8  | ZNF552 | Homo sapiens cDNA FLJ13707 fis, clone PLACE2000347. [AK023769]                        | 79818  |

|              |      |      |      |      |        |                                                                                       |        |
|--------------|------|------|------|------|--------|---------------------------------------------------------------------------------------|--------|
| A_32_P177097 | -1.0 | -2.5 | -1.0 | -1.0 | ZNF557 | Homo sapiens zinc finger protein 557 (ZNF557), transcript variant 1, mRNA [NM_024341] | 79230  |
| A_23_P28015  | -2.4 | -1.1 | 1.0  | -1.5 | ZNF558 | Homo sapiens zinc finger protein 558 (ZNF558), mRNA [NM_144693]                       | 148156 |
| A_24_P284584 | -1.7 | -2.2 | -1.9 | -1.9 | ZNF559 | Homo sapiens zinc finger protein 559 (ZNF559), transcript variant 2, mRNA [NM_032497] | 84527  |
| A_23_P368773 | 1.3  | -1.2 | -2.8 | 1.1  | ZNF560 | Homo sapiens zinc finger protein 560 (ZNF560), mRNA [NM_152476]                       | 147741 |

|              |      |      |      |      |        |                                                                                          |        |
|--------------|------|------|------|------|--------|------------------------------------------------------------------------------------------|--------|
| A_23_P95923  | 2.6  | 12.2 | 4.9  | 5.5  | ZNF562 | Homo sapiens zinc finger protein 562 (ZNF562), transcript variant 3, mRNA [NM_017656]    | 54811  |
| A_24_P348208 | -1.1 | -2.1 | -2.1 | -2.0 | ZNF562 | Homo sapiens zinc finger protein 562 (ZNF562), transcript variant 3, mRNA [NM_017656]    | 54811  |
| A_23_P101615 | 2.2  | 2.2  | 2.2  | 2.2  | ZNF565 | Homo sapiens zinc finger protein 565 (ZNF565), transcript variant 1, mRNA [NM_001042474] | 147929 |
| A_23_P208752 | -5.9 | 1.1  | -2.2 | 1.1  | ZNF566 | Homo sapiens zinc finger protein 566 (ZNF566), transcript variant 1, mRNA [NM_001145345] | 84924  |

|              |      |      |      |      |        |                                                                                                |        |
|--------------|------|------|------|------|--------|------------------------------------------------------------------------------------------------|--------|
| A_24_P915049 | 1.0  | -2.4 | -2.8 | -1.5 | ZNF568 | Homo sapiens zinc finger protein 568, mRNA (cDNA clone IMAGE:4052822), partial cds. [BC016334] | 374900 |
| A_24_P101304 | -1.1 | -1.0 | -2.7 | -1.0 | ZNF568 | Homo sapiens zinc finger protein 568 (ZNF568), transcript variant 1, mRNA [NM_198539]          | 374900 |
| A_23_P131128 | -1.0 | 1.0  | 2.6  | 1.5  | ZNF569 | Homo sapiens zinc finger protein 569 (ZNF569), mRNA [NM_152484]                                | 148266 |
| A_23_P79145  | -1.3 | -1.7 | -3.6 | -1.5 | ZNF570 | Homo sapiens zinc finger protein 570 (ZNF570), mRNA [NM_144694]                                | 148268 |

|              |      |      |      |      |        |                                                                                       |        |
|--------------|------|------|------|------|--------|---------------------------------------------------------------------------------------|--------|
| A_23_P401084 | 1.0  | -1.0 | -1.1 | -3.2 | ZNF575 | Homo sapiens zinc finger protein 575 (ZNF575), mRNA [NM_174945]                       | 284346 |
| A_23_P339601 | -3.3 | -1.0 | -1.1 | -1.1 | ZNF578 | Homo sapiens zinc finger protein 578 (ZNF578), mRNA [NM_001099694]                    | 147660 |
| A_23_P164797 | -1.4 | 1.3  | -2.4 | -1.3 | ZNF580 | Homo sapiens zinc finger protein 580 (ZNF580), transcript variant 1, mRNA [NM_016202] | 51157  |
| A_23_P4798   | 1.3  | -1.7 | -2.1 | -2.6 | ZNF581 | Homo sapiens zinc finger protein 581 (ZNF581), mRNA [NM_016535]                       | 51545  |
| A_23_P395464 | 1.0  | -4.2 | -1.0 | -1.0 | ZNF582 | Homo sapiens zinc finger protein 582 (ZNF582), mRNA [NM_144690]                       | 147948 |



|              |      |      |      |      |         |                                                                                       |        |
|--------------|------|------|------|------|---------|---------------------------------------------------------------------------------------|--------|
| A_24_P849467 | 4.8  | 4.6  | 3.2  | 4.8  | ZNF585A | Homo sapiens cDNA FLJ41302 fis, clone BRAMY204212. [AK123296]                         | 199704 |
| A_24_P25470  | 2.6  | 2.6  | 2.6  | 2.6  | ZNF586  | zinc finger protein 586 [Source:HGNC Symbol;Acc:25949] [ENST00000430084]              | 54807  |
| A_24_P83944  | -1.0 | -1.0 | -3.7 | -1.5 | ZNF586  | Homo sapiens zinc finger protein 586 (ZNF586), transcript variant 1, mRNA [NM_017652] | 54807  |
| A_24_P373726 | -2.0 | 1.7  | 1.6  | 1.0  | ZNF587  | Homo sapiens zinc finger protein 587 (ZNF587), transcript variant 1, mRNA [NM_032828] | 84914  |

|              |      |      |      |      |        |                                                                                          |        |
|--------------|------|------|------|------|--------|------------------------------------------------------------------------------------------|--------|
| A_24_P313804 | -6.2 | -1.8 | -6.1 | -2.1 | ZNF587 | Homo sapiens zinc finger protein 587 (ZNF587), transcript variant 1, mRNA [NM_032828]    | 84914  |
| A_23_P34741  | -8.2 | -1.2 | -1.3 | -1.3 | ZNF593 | Homo sapiens zinc finger protein 593 (ZNF593), mRNA [NM_015871]                          | 51042  |
| A_23_P155939 | -1.2 | -1.2 | -2.0 | -2.6 | ZNF595 | Homo sapiens zinc finger protein 595 (ZNF595), mRNA [NM_182524]                          | 152687 |
| A_32_P187663 | -4.1 | 1.1  | -2.9 | 1.1  | ZNF596 | Homo sapiens zinc finger protein 596 (ZNF596), transcript variant 1, mRNA [NM_001042416] | 169270 |

|              |      |      |      |      |        |                                                                                       |        |
|--------------|------|------|------|------|--------|---------------------------------------------------------------------------------------|--------|
| A_24_P378402 | -2.7 | -1.2 | 1.0  | -1.8 | ZNF597 | Homo sapiens zinc finger protein 597 (ZNF597), mRNA [NM_152457]                       | 146434 |
| A_23_P3753   | 2.6  | 2.6  | 2.7  | 1.5  | ZNF597 | Homo sapiens zinc finger protein 597 (ZNF597), mRNA [NM_152457]                       | 146434 |
| A_23_P16006  | 2.5  | 2.3  | 2.3  | 2.1  | ZNF600 | Homo sapiens zinc finger protein 600 (ZNF600), mRNA [NM_198457]                       | 162966 |
| A_23_P208172 | 1.1  | 2.2  | -1.5 | 1.8  | ZNF613 | Homo sapiens cDNA FLJ13590 fis, clone PLACE1009398. [AK023652]                        | 79898  |
| A_24_P173234 | -2.1 | -1.0 | -1.3 | -1.0 | ZNF613 | Homo sapiens zinc finger protein 613 (ZNF613), transcript variant 2, mRNA [NM_024840] | 79898  |

|              |     |      |      |      |        |                                                                                       |        |
|--------------|-----|------|------|------|--------|---------------------------------------------------------------------------------------|--------|
| A_23_P101258 | 2.0 | -1.1 | -1.1 | -1.0 | ZNF614 | Homo sapiens zinc finger protein 614 (ZNF614), mRNA [NM_025040]                       | 80110  |
| A_24_P190345 | 1.0 | 1.0  | -1.0 | -2.1 | ZNF615 | Homo sapiens zinc finger protein 615 (ZNF615), transcript variant 2, mRNA [NM_198480] | 284370 |
| A_32_P186921 | 1.0 | 1.0  | -3.6 | -2.3 | ZNF616 | Homo sapiens zinc finger protein 616, mRNA (cDNA clone IMAGE:4186857). [BC032805]     | 90317  |
| A_24_P743802 | 1.1 | -3.0 | -1.0 | 1.0  | ZNF618 | Homo sapiens zinc finger protein 618 (ZNF618), mRNA [NM_133374]                       | 114991 |

|              |      |      |      |      |        |                                                                                          |        |
|--------------|------|------|------|------|--------|------------------------------------------------------------------------------------------|--------|
| A_23_P405216 | -1.1 | -1.1 | -3.9 | 1.1  | ZNF619 | Homo sapiens zinc finger protein 619 (ZNF619), transcript variant 5, mRNA [NM_001145083] | 285267 |
| A_24_P344537 | 1.9  | -1.1 | -2.4 | -2.1 | ZNF625 | Homo sapiens zinc finger protein 625 (ZNF625), transcript variant 1, mRNA [NM_145233]    | 90589  |
| A_32_P102778 | -2.7 | -2.0 | 1.4  | -2.2 | ZNF626 | Homo sapiens zinc finger protein 626 (ZNF626), transcript variant 1, mRNA [NM_001076675] | 199777 |
| A_23_P390384 | -2.8 | -1.8 | 1.2  | -1.7 | ZNF630 | Homo sapiens zinc finger protein 630 (ZNF630), transcript variant 1, mRNA [NM_001037735] | 57232  |

|              |       |      |      |      |        |                                                                                          |        |
|--------------|-------|------|------|------|--------|------------------------------------------------------------------------------------------|--------|
| A_32_P199767 | -1.6  | -1.2 | -2.0 | -1.2 | ZNF630 | Homo sapiens zinc finger protein 630 (ZNF630), transcript variant 1, mRNA [NM_001037735] | 57232  |
| A_24_P419177 | -10.7 | -2.4 | -3.1 | -1.6 | ZNF638 | Homo sapiens zinc finger protein 638 (ZNF638), transcript variant 1, mRNA [NM_014497]    | 27332  |
| A_32_P24709  | -1.8  | -1.8 | -3.7 | -2.0 | ZNF642 | Homo sapiens zinc finger protein 642 (ZNF642), mRNA [NM_198494]                          | 339559 |
| A_24_P238402 | 1.6   | 3.8  | 2.5  | 2.5  | ZNF644 | Homo sapiens zinc finger protein 644 (ZNF644), transcript variant 1, mRNA [NM_201269]    | 84146  |

|              |      |      |       |      |        |                                                                                       |        |
|--------------|------|------|-------|------|--------|---------------------------------------------------------------------------------------|--------|
| A_24_P256337 | -1.0 | -4.3 | -1.7  | 5.2  | ZNF644 | Homo sapiens zinc finger protein 644 (ZNF644), transcript variant 1, mRNA [NM_201269] | 84146  |
| A_24_P31875  | 1.2  | 1.3  | 1.5   | -4.5 | ZNF645 | Homo sapiens zinc finger protein 645 (ZNF645), mRNA [NM_152577]                       | 158506 |
| A_24_P181506 | 1.0  | -1.0 | -26.0 | -1.1 | ZNF646 | Homo sapiens zinc finger protein 646 (ZNF646), mRNA [NM_014699]                       | 9726   |
| A_23_P55256  | -2.7 | 2.0  | 1.8   | 1.4  | ZNF652 | Homo sapiens zinc finger protein 652 (ZNF652), transcript variant 2, mRNA [NM_014897] | 22834  |

|              |      |      |      |      |        |                                                                                          |        |
|--------------|------|------|------|------|--------|------------------------------------------------------------------------------------------|--------|
| A_23_P325676 | 1.2  | 3.9  | -1.1 | 1.7  | ZNF653 | Homo sapiens zinc finger protein 653 (ZNF653), mRNA [NM_138783]                          | 115950 |
| A_23_P215819 | 1.0  | -1.1 | -1.2 | -5.5 | ZNF655 | Homo sapiens zinc finger protein 655 (ZNF655), transcript variant 2, mRNA [NM_024061]    | 79027  |
| A_23_P345081 | 1.0  | -1.2 | -1.1 | -3.7 | ZNF655 | Homo sapiens zinc finger protein 655 (ZNF655), transcript variant 7, mRNA [NM_001083956] | 79027  |
| A_32_P220739 | -3.3 | -1.2 | -1.6 | -1.2 | ZNF658 | Homo sapiens zinc finger protein 658 (ZNF658), mRNA [NM_033160]                          | 26149  |



|              |       |      |       |      |        |                                                                                       |        |
|--------------|-------|------|-------|------|--------|---------------------------------------------------------------------------------------|--------|
| A_23_P31938  | -15.3 | -1.1 | -4.4  | -1.3 | ZNF658 | Homo sapiens zinc finger protein 658 (ZNF658), mRNA [NM_033160]                       | 26149  |
| A_32_P375286 | -1.0  | -1.1 | -17.9 | -1.5 | ZNF660 | Homo sapiens zinc finger protein 660 (ZNF660), mRNA [NM_173658]                       | 285349 |
| A_24_P341292 | 2.6   | 3.5  | 1.1   | 2.6  | ZNF665 | Homo sapiens zinc finger protein 665 (ZNF665), mRNA [NM_024733]                       | 79788  |
| A_23_P66289  | 1.0   | -8.4 | 2.0   | 2.1  | ZNF668 | Homo sapiens zinc finger protein 668 (ZNF668), transcript variant 2, mRNA [NM_024706] | 79759  |
| A_23_P50217  | -12.5 | 1.2  | -1.1  | -1.0 | ZNF671 | Homo sapiens zinc finger protein 671 (ZNF671), mRNA [NM_024833]                       | 79891  |

|              |      |      |      |      |        |                                                                                          |        |
|--------------|------|------|------|------|--------|------------------------------------------------------------------------------------------|--------|
| A_24_P92558  | 1.3  | -1.0 | -2.8 | -1.0 | ZNF674 | Homo sapiens zinc finger protein 674 (ZNF674), transcript variant 1, mRNA [NM_001039891] | 641339 |
| A_23_P339687 | 2.5  | 1.0  | -2.6 | -1.5 | ZNF675 | Homo sapiens zinc finger protein 675 (ZNF675), mRNA [NM_138330]                          | 171392 |
| A_24_P205036 | -1.6 | -1.9 | -1.8 | -2.6 | ZNF676 | Homo sapiens zinc finger protein 676 (ZNF676), mRNA [NM_001001411]                       | 163223 |
| A_32_P189845 | -1.1 | -1.1 | -3.3 | -1.6 | ZNF680 | Homo sapiens zinc finger protein 680 (ZNF680), transcript variant 1, mRNA [NM_178558]    | 340252 |

|              |      |      |      |      |        |                                                                                       |        |
|--------------|------|------|------|------|--------|---------------------------------------------------------------------------------------|--------|
| A_23_P305210 | 2.6  | 2.5  | 1.1  | 2.5  | ZNF680 | Homo sapiens zinc finger protein 680 (ZNF680), transcript variant 1, mRNA [NM_178558] | 340252 |
| A_23_P337923 | 1.6  | 1.7  | 3.4  | 1.0  | ZNF680 | Homo sapiens zinc finger protein 680 (ZNF680), transcript variant 1, mRNA [NM_178558] | 340252 |
| A_23_P375517 | 2.0  | -1.6 | -1.3 | 2.0  | ZNF681 | Homo sapiens zinc finger protein 681 (ZNF681), mRNA [NM_138286]                       | 148213 |
| A_23_P141044 | -4.7 | 1.1  | -1.1 | -2.0 | ZNF688 | Homo sapiens zinc finger protein 688 (ZNF688), transcript variant 1, mRNA [NM_145271] | 146542 |

|              |      |      |      |      |        |                                                                                       |       |
|--------------|------|------|------|------|--------|---------------------------------------------------------------------------------------|-------|
| A_23_P35316  | 2.3  | 1.2  | 2.0  | 1.3  | ZNF695 | Homo sapiens zinc finger protein 695 (ZNF695), transcript variant 1, mRNA [NM_020394] | 57116 |
| A_23_P322076 | 1.1  | -2.4 | -1.1 | 1.0  | ZNF697 | Homo sapiens zinc finger protein 697 (ZNF697), mRNA [NM_001080470]                    | 90874 |
| A_32_P19716  | -1.1 | 1.0  | -3.7 | 1.1  | ZNF697 | Homo sapiens zinc finger protein 697 (ZNF697), mRNA [NM_001080470]                    | 90874 |
| A_23_P255805 | 1.7  | 2.4  | 1.7  | 1.4  | ZNF7   | Homo sapiens zinc finger protein 7 (ZNF7), mRNA [NM_003416]                           | 7553  |
| A_24_P941625 | 1.3  | 2.0  | 1.1  | -4.0 | ZNF70  | Homo sapiens zinc finger protein 70 (ZNF70), mRNA [NM_021916]                         | 7621  |

|              |      |      |      |      |         |                                                                    |        |
|--------------|------|------|------|------|---------|--------------------------------------------------------------------|--------|
| A_23_P27638  | -1.0 | 2.1  | -1.4 | 1.7  | ZNF700  | Homo sapiens zinc finger protein 700 (ZNF700), mRNA [NM_144566]    | 90592  |
| A_23_P55666  | 1.7  | 1.8  | 2.0  | 1.0  | ZNF702P | Homo sapiens cDNA FLJ12985 fis, clone NT2RP3000050. [AK023047]     | 79986  |
| A_24_P274928 | 4.1  | 2.1  | 2.9  | 1.1  | ZNF703  | Homo sapiens zinc finger protein 703 (ZNF703), mRNA [NM_025069]    | 80139  |
| A_32_P229493 | -2.6 | -1.3 | -1.1 | -3.3 | ZNF704  | Homo sapiens zinc finger protein 704 (ZNF704), mRNA [NM_001033723] | 619279 |
| A_24_P230074 | -1.9 | -1.5 | -1.3 | -2.1 | ZNF704  | Homo sapiens zinc finger protein 704 (ZNF704), mRNA [NM_001033723] | 619279 |

|              |      |      |      |      |        |                                                                                          |       |
|--------------|------|------|------|------|--------|------------------------------------------------------------------------------------------|-------|
| A_24_P235305 | -4.1 | 1.4  | -1.1 | -1.7 | ZNF706 | Homo sapiens zinc finger protein 706 (ZNF706), transcript variant 1, mRNA [NM_001042510] | 51123 |
| A_32_P46154  | -1.5 | 1.4  | -2.5 | 1.0  | ZNF708 | Homo sapiens zinc finger protein 708 (ZNF708), mRNA [NM_021269]                          | 7562  |
| A_24_P680908 | 1.2  | 1.2  | -3.4 | 1.0  | ZNF708 | Homo sapiens zinc finger protein 708 (ZNF708), mRNA [NM_021269]                          | 7562  |
| A_32_P46155  | 1.1  | 1.1  | -3.4 | -1.0 | ZNF708 | Homo sapiens zinc finger protein 708 (ZNF708), mRNA [NM_021269]                          | 7562  |
| A_23_P340148 | 1.1  | -9.2 | 1.0  | -1.0 | ZNF711 | Homo sapiens zinc finger protein 711 (ZNF711), mRNA [NM_021998]                          | 7552  |

|              |      |      |      |      |        |                                                                               |        |
|--------------|------|------|------|------|--------|-------------------------------------------------------------------------------|--------|
| A_23_P74114  | 5.4  | 3.4  | 4.0  | 2.0  | ZNF713 | Homo sapiens zinc finger protein 713 (ZNF713), mRNA [NM_182633]               | 349075 |
| A_23_P50825  | 1.6  | 5.2  | 1.2  | 5.8  | ZNF714 | Homo sapiens zinc finger protein 714 (ZNF714), mRNA [NM_182515]               | 148206 |
| A_24_P204639 | -1.8 | 1.6  | -3.0 | -1.6 | ZNF716 | Homo sapiens zinc finger protein 716 (ZNF716), mRNA [NM_001159279]            | 441234 |
| A_23_P124438 | -6.1 | -7.0 | -2.0 | -3.9 | ZNF718 | Homo sapiens zinc finger protein 718 (ZNF718), mRNA [NM_001039127]            | 255403 |
| A_24_P358868 | -6.6 | 1.0  | 1.3  | -1.0 | ZNF728 | PREDICTED: Homo sapiens zinc finger protein 728 (ZNF728), mRNA [XM_001720936] | 388523 |

|              |      |      |      |      |        |                                                                          |           |
|--------------|------|------|------|------|--------|--------------------------------------------------------------------------|-----------|
| A_24_P161696 | 1.5  | 1.6  | 1.2  | 2.1  | ZNF729 | Homo sapiens zinc finger protein 729 (ZNF729), mRNA [NM_001242680]       | 100287226 |
| A_24_P126491 | 1.1  | -1.5 | 2.4  | 1.5  | ZNF729 | Homo sapiens zinc finger protein 729 (ZNF729), mRNA [NM_001242680]       | 100287226 |
| A_32_P181513 | 1.0  | -2.8 | -2.9 | -1.9 | ZNF730 | zinc finger protein 730 [Source:HGNC Symbol;Acc:32470] [ENST00000327867] | 100129543 |
| A_24_P281801 | 1.2  | -2.5 | -1.7 | 1.0  | ZNF732 | Homo sapiens zinc finger protein 732 (ZNF732), mRNA [NM_001137608]       | 654254    |
| A_24_P897062 | -4.2 | -1.0 | -1.1 | -1.1 | ZNF736 | Homo sapiens zinc finger protein 736 (ZNF736), mRNA [NM_001170905]       | 728927    |



|              |      |      |      |      |        |                                                                                       |           |
|--------------|------|------|------|------|--------|---------------------------------------------------------------------------------------|-----------|
| A_23_P28042  | 2.1  | 2.7  | 1.9  | 2.0  | ZNF737 | Homo sapiens zinc finger protein 737 (ZNF737), mRNA [NM_001159293]                    | 100129842 |
| A_32_P68148  | -1.7 | -5.4 | -3.5 | -3.3 | ZNF738 | Homo sapiens zinc finger protein 738 (ZNF738), non-coding RNA [NR_027130]             | 148203    |
| A_32_P3705   | 1.8  | 2.1  | 1.6  | -1.1 | ZNF740 | Homo sapiens zinc finger protein 740 (ZNF740), mRNA [NM_001004304]                    | 283337    |
| A_24_P206344 | -1.5 | 1.4  | -1.1 | -2.1 | ZNF746 | Homo sapiens zinc finger protein 746 (ZNF746), transcript variant 2, mRNA [NM_152557] | 155061    |

|              |      |      |      |      |        |                                                                                       |        |
|--------------|------|------|------|------|--------|---------------------------------------------------------------------------------------|--------|
| A_23_P3819   | 5.0  | 4.6  | 2.5  | 5.0  | ZNF747 | Homo sapiens zinc finger protein 747 (ZNF747), mRNA [NM_023931]                       | 65988  |
| A_23_P73708  | -1.0 | -1.0 | -2.4 | -1.0 | ZNF75D | Homo sapiens zinc finger protein 75D (ZNF75D), transcript variant 1, mRNA [NM_007131] | 7626   |
| A_24_P941487 | 2.2  | 1.2  | 1.1  | -1.0 | ZNF761 | Homo sapiens zinc finger protein 761 (ZNF761), mRNA [NM_001008401]                    | 388561 |
| A_23_P206792 | 1.8  | -2.3 | 1.6  | 1.3  | ZNF764 | Homo sapiens zinc finger protein 764 (ZNF764), transcript variant 1, mRNA [NM_033410] | 92595  |

|              |      |      |      |      |        |                                                                                                       |       |
|--------------|------|------|------|------|--------|-------------------------------------------------------------------------------------------------------|-------|
| A_32_P84772  | 2.1  | -1.0 | -1.1 | 2.1  | ZNF765 | Homo sapiens zinc finger protein 765 (ZNF765), mRNA [NM_001040185]                                    | 91661 |
| A_24_P202637 | 2.2  | 2.1  | 2.1  | -1.2 | ZNF765 | zinc finger protein 765 [Source:HGNC Symbol;Acc:25092] [ENST00000504235]                              | 91661 |
| A_24_P935276 | 1.3  | -9.2 | 1.1  | 1.6  | ZNF766 | Homo sapiens zinc finger protein 766 (ZNF766), mRNA [NM_001010851]                                    | 90321 |
| A_23_P323143 | -1.3 | -1.2 | -5.0 | -1.9 | ZNF767 | Homo sapiens zinc finger family member 767 (ZNF767), transcript variant 1, non-coding RNA [NR_027788] | 79970 |

|              |      |      |      |      |        |                                                                                          |        |
|--------------|------|------|------|------|--------|------------------------------------------------------------------------------------------|--------|
| A_23_P15218  | 2.0  | 2.1  | 1.6  | 1.3  | ZNF768 | Homo sapiens zinc finger protein 768 (ZNF768), mRNA [NM_024671]                          | 79724  |
| A_23_P65733  | -3.0 | -2.8 | -5.7 | -2.6 | ZNF770 | Homo sapiens zinc finger protein 770 (ZNF770), mRNA [NM_014106]                          | 54989  |
| A_24_P186324 | -1.0 | -1.0 | -1.1 | -4.9 | ZNF770 | Homo sapiens zinc finger protein 770 (ZNF770), mRNA [NM_014106]                          | 54989  |
| A_23_P67089  | 1.4  | -1.8 | -3.6 | -1.1 | ZNF772 | Homo sapiens zinc finger protein 772 (ZNF772), transcript variant 1, mRNA [NM_001024596] | 400720 |
| A_24_P384099 | -2.3 | -1.1 | -3.7 | -1.4 | ZNF775 | Homo sapiens zinc finger protein 775 (ZNF775), mRNA [NM_173680]                          | 285971 |

|              |      |      |      |      |         |                                                                                                                                             |        |
|--------------|------|------|------|------|---------|---------------------------------------------------------------------------------------------------------------------------------------------|--------|
| A_23_P351232 | 1.0  | 2.2  | -1.2 | -1.0 | ZNF775  | Homo sapiens zinc finger protein 775 (ZNF775), mRNA [NM_173680]                                                                             | 285971 |
| A_23_P378499 | -1.1 | 1.0  | 1.0  | 2.9  | ZNF776  | Homo sapiens cDNA FLJ38288 fis, clone FCBBF3008382, weakly similar to Homo sapiens C2H2 (Kruppel-type) zinc finger protein mRNA. [AK095607] | 284309 |
| A_23_P309803 | -1.2 | 1.6  | -3.8 | -1.4 | ZNF777  | Homo sapiens zinc finger protein 777 (ZNF777), mRNA [NM_015694]                                                                             | 27153  |
| A_32_P84846  | -1.1 | -1.0 | -1.1 | -3.1 | ZNF780B | Homo sapiens zinc finger protein 780B (ZNF780B), mRNA [NM_001005851]                                                                        | 163131 |

|              |      |      |      |      |        |                                                                                       |        |
|--------------|------|------|------|------|--------|---------------------------------------------------------------------------------------|--------|
| A_24_P944063 | 6.1  | 6.4  | 5.8  | 5.2  | ZNF785 | Homo sapiens zinc finger protein 785 (ZNF785), mRNA [NM_152458]                       | 146540 |
| A_24_P919279 | -2.5 | -1.0 | -1.1 | -1.0 | ZNF790 | Homo sapiens zinc finger protein 790 (ZNF790), transcript variant 1, mRNA [NM_206894] | 388536 |
| A_24_P382401 | 1.0  | -2.0 | -1.1 | -1.0 | ZNF791 | Homo sapiens zinc finger protein 791 (ZNF791), mRNA [NM_153358]                       | 163049 |
| A_23_P50418  | 3.4  | 5.0  | 3.2  | 3.2  | ZNF791 | Homo sapiens zinc finger protein 791 (ZNF791), mRNA [NM_153358]                       | 163049 |
| A_23_P130466 | -1.2 | 4.0  | 1.1  | 1.0  | ZNF8   | Homo sapiens zinc finger protein 8 (ZNF8), mRNA [NM_021089]                           | 7554   |

|              |      |      |      |      |         |                                                                                          |        |
|--------------|------|------|------|------|---------|------------------------------------------------------------------------------------------|--------|
| A_23_P419192 | 1.6  | -3.8 | 1.6  | 1.3  | ZNF800  | Homo sapiens zinc finger protein 800 (ZNF800), mRNA [NM_176814]                          | 168850 |
| A_24_P374461 | 1.3  | 2.2  | 1.3  | -1.0 | ZNF804B | Homo sapiens zinc finger protein 804B (ZNF804B), mRNA [NM_181646]                        | 219578 |
| A_24_P450870 | 1.1  | 1.3  | -2.1 | 1.1  | ZNF813  | zinc finger protein 813 [Source:HGNC Symbol;Acc:33257] [ENST00000396403]                 | 126017 |
| A_32_P96435  | -2.8 | 1.0  | 1.0  | 1.0  | ZNF829  | Homo sapiens zinc finger protein 829 (ZNF829), transcript variant 2, mRNA [NM_001037232] | 374899 |
| A_23_P387071 | -3.3 | 1.2  | 1.2  | -1.5 | ZNF830  | Homo sapiens zinc finger protein 830 (ZNF830), mRNA [NM_052857]                          | 91603  |

|              |      |      |      |      |        |                                                                         |        |
|--------------|------|------|------|------|--------|-------------------------------------------------------------------------|--------|
| A_32_P206479 | 2.2  | 1.6  | 1.5  | 1.0  | ZNF831 | Homo sapiens zinc finger protein 831 (ZNF831), mRNA [NM_178457]         | 128611 |
| A_23_P330929 | 2.0  | -3.0 | -3.2 | 1.2  | ZNF835 | Homo sapiens zinc finger protein 835 (ZNF835), mRNA [NM_001005850]      | 90485  |
| A_23_P27404  | -3.2 | -1.2 | -1.5 | -2.1 | ZNF841 | Homo sapiens zinc finger protein 841 (ZNF841), mRNA [NM_001136499]      | 284371 |
| A_24_P161144 | -1.1 | -1.1 | -2.1 | -1.6 | ZNF843 | Homo sapiens zinc finger protein 843 (ZNF843), mRNA [NM_001136509]      | 283933 |
| A_24_P110743 | -2.2 | -1.1 | -1.2 | -1.2 | ZNF844 | zinc finger protein 844 [Source:HGNC Symbol;Acc:25932] [ENST0000439326] | 284391 |



|              |      |      |      |      |        |                                                                                     |        |
|--------------|------|------|------|------|--------|-------------------------------------------------------------------------------------|--------|
| A_23_P67702  | 1.3  | -3.6 | -1.8 | 1.0  | ZNF85  | Homo sapiens zinc finger protein 85 (ZNF85), transcript variant 1, mRNA [NM_003429] | 7639   |
| A_24_P450596 | -1.1 | -1.1 | -8.1 | -1.4 | ZNF850 | Homo sapiens zinc finger protein 850 (ZNF850), mRNA [NM_001193552]                  | 342892 |
| A_24_P153207 | -2.4 | 1.5  | 1.8  | 1.7  | ZNF850 | Homo sapiens zinc finger protein 850 (ZNF850), mRNA [NM_001193552]                  | 342892 |
| A_23_P8408   | 1.4  | 2.0  | -2.2 | 2.5  | ZNF862 | Homo sapiens zinc finger protein 862 (ZNF862), mRNA [NM_001099220]                  | 643641 |

|              |      |      |      |      |         |                                                                                        |        |
|--------------|------|------|------|------|---------|----------------------------------------------------------------------------------------|--------|
| A_32_P930685 | -1.3 | -1.2 | -4.0 | -3.6 | ZNF876P | Homo sapiens zinc finger protein 876, pseudogene (ZNF876P), non-coding RNA [NR_027481] | 642280 |
| A_24_P791669 | 1.0  | -1.0 | -1.1 | -4.5 | ZNF879  | Homo sapiens zinc finger protein 879 (ZNF879), mRNA [NM_001136116]                     | 345462 |
| A_24_P926783 | -1.2 | -1.2 | -3.7 | -1.3 | ZNF880  | Homo sapiens zinc finger protein 880 (ZNF880), mRNA [NM_001145434]                     | 400713 |
| A_32_P790361 | 1.0  | -1.0 | -2.9 | 1.0  | ZNF90   | Homo sapiens zinc finger protein 90 (ZNF90), mRNA [NM_007138]                          | 7643   |
| A_23_P209146 | 1.0  | 1.2  | -2.7 | -1.1 | ZNF91   | Homo sapiens zinc finger protein 91 (ZNF91), mRNA [NM_003430]                          | 7644   |

|              |     |      |      |      |           |                                                                                     |        |
|--------------|-----|------|------|------|-----------|-------------------------------------------------------------------------------------|--------|
| A_24_P192209 | 2.4 | -2.0 | 1.1  | 2.2  | ZNF92     | Homo sapiens zinc finger protein 92 (ZNF92), transcript variant 1, mRNA [NM_007139] | 168374 |
| A_23_P124585 | 1.0 | -1.5 | -3.6 | -2.0 | ZNF93     | Homo sapiens zinc finger protein 93 (ZNF93), mRNA [NM_031218]                       | 81931  |
| A_24_P23034  | 2.1 | 1.1  | 2.9  | 2.2  | ZNFX1     | Homo sapiens zinc finger, NFX1-type containing 1 (ZNFX1), mRNA [NM_021035]          | 57169  |
| A_32_P157385 | 2.1 | 2.1  | 2.6  | 3.5  | ZNFX1-AS1 | Homo sapiens cDNA FLJ42181 fis, clone THYMU2031368. [AK124175]                      | 441951 |
| A_23_P111843 | 1.0 | 2.1  | -1.1 | -4.3 | ZNHIT1    | Homo sapiens zinc finger, HIT-type containing 1 (ZNHIT1), mRNA [NM_006349]          | 10467  |

|              |      |      |      |      |       |                                                                                        |        |
|--------------|------|------|------|------|-------|----------------------------------------------------------------------------------------|--------|
| A_24_P193624 | 5.9  | 9.3  | 5.5  | 5.3  | ZNRF1 | Homo sapiens zinc and ring finger 1 (ZNRF1), mRNA [NM_032268]                          | 84937  |
| A_24_P16610  | -2.6 | -1.4 | -1.7 | -3.2 | ZNRF1 | Homo sapiens zinc and ring finger 1 (ZNRF1), mRNA [NM_032268]                          | 84937  |
| A_24_P262221 | -1.9 | 2.9  | -3.0 | -2.4 | ZNRF1 | Homo sapiens zinc and ring finger 1 (ZNRF1), mRNA [NM_032268]                          | 84937  |
| A_23_P325017 | -1.9 | -3.2 | -1.2 | 1.2  | ZNRF2 | Homo sapiens zinc and ring finger 2 (ZNRF2), mRNA [NM_147128]                          | 223082 |
| A_24_P162373 | 1.2  | 3.5  | 3.3  | 3.5  | ZNRF3 | Homo sapiens zinc and ring finger 3 (ZNRF3), transcript variant 1, mRNA [NM_001206998] | 84133  |

|              |      |       |      |       |        |                                                                                                            |        |
|--------------|------|-------|------|-------|--------|------------------------------------------------------------------------------------------------------------|--------|
| A_23_P374559 | -2.2 | -3.3  | -5.9 | -7.3  | ZNRF4  | Homo sapiens zinc and ring finger 4 (ZNRF4), mRNA [NM_181710]                                              | 148066 |
| A_23_P1912   | -1.1 | 1.3   | -3.0 | -10.1 | ZP1    | Homo sapiens zona pellucida glycoprotein 1 (sperm receptor) (ZP1), mRNA [NM_207341]                        | 22917  |
| A_23_P89132  | -1.5 | -32.1 | -1.5 | -1.1  | ZP2    | Homo sapiens zona pellucida glycoprotein 2 (sperm receptor) (ZP2), mRNA [NM_003460]                        | 7783   |
| A_23_P85521  | 1.9  | -1.8  | 2.0  | 2.1   | ZRANB2 | Homo sapiens zinc finger, RAN-binding domain containing 2 (ZRANB2), transcript variant 1, mRNA [NM_203350] | 9406   |

|              |      |      |      |       |        |                                                                                                                                    |       |
|--------------|------|------|------|-------|--------|------------------------------------------------------------------------------------------------------------------------------------|-------|
| A_23_P412059 | -9.5 | -1.0 | -1.1 | 1.1   | ZRANB3 | zinc finger,<br>RAN-<br>binding<br>domain<br>containing<br>3<br>[Source:H<br>GNC<br>Symbol;Ac<br>c:25249]<br>[ENST0000<br>0403017] | 84083 |
| A_24_P222997 | 1.7  | 1.3  | -5.0 | 1.5   | ZRANB3 | Homo<br>sapiens<br>zinc finger,<br>RAN-<br>binding<br>domain<br>containing<br>3<br>(ZRANB3),<br>mRNA<br>[NM_0321<br>43]            | 84083 |
| A_24_P32394  | 1.3  | 1.7  | 1.2  | -19.5 | ZRANB3 | Homo<br>sapiens<br>zinc finger,<br>RAN-<br>binding<br>domain<br>containing<br>3<br>(ZRANB3),<br>mRNA<br>[NM_0321<br>43]            | 84083 |

|              |     |     |      |      |         |                                                                                                                    |        |
|--------------|-----|-----|------|------|---------|--------------------------------------------------------------------------------------------------------------------|--------|
| A_23_P322395 | 2.8 | 3.2 | 5.1  | 2.0  | ZSCAN1  | Homo sapiens zinc finger and SCAN domain containing 1 (ZSCAN1), mRNA [NM_182572]                                   | 284312 |
| A_23_P15135  | 1.6 | 3.2 | -1.4 | 1.3  | ZSCAN10 | Homo sapiens zinc finger and SCAN domain containing 10 (ZSCAN10), mRNA [NM_032805]                                 | 84891  |
| A_23_P323898 | 1.1 | 2.1 | 1.6  | -1.5 | ZSCAN12 | Homo sapiens zinc finger and SCAN domain containing 12 (ZSCAN12), transcript variant 2, non-coding RNA [NR_028077] | 9753   |

|              |      |      |      |      |           |                                                                                                             |        |
|--------------|------|------|------|------|-----------|-------------------------------------------------------------------------------------------------------------|--------|
| A_32_P360518 | -2.1 | 5.2  | -1.6 | -1.6 | ZSCAN12P1 | Homo sapiens zinc finger and SCAN domain containing 12 pseudogene 1 (ZSCAN12P1), non-coding RNA [NR_024063] | 221584 |
| A_23_P259098 | 1.1  | -5.2 | 1.1  | -2.1 | ZSCAN16   | Homo sapiens zinc finger and SCAN domain containing 16 (ZSCAN16), mRNA [NM_025231]                          | 80345  |
| A_24_P920880 | -1.1 | 1.1  | -2.3 | -2.1 | ZSCAN18   | Homo sapiens truncated zinc finger protein 447 isoform (ZNF447) mRNA, complete cds. [AY279352]              | 65982  |



|              |      |      |      |      |         |                                                                                                          |        |
|--------------|------|------|------|------|---------|----------------------------------------------------------------------------------------------------------|--------|
| A_24_P39919  | 1.7  | -1.6 | -1.6 | -3.4 | ZSCAN18 | Homo sapiens zinc finger and SCAN domain containing 18 (ZSCAN18), transcript variant 3, mRNA [NM_023926] | 65982  |
| A_23_P417372 | 1.3  | -1.8 | 1.1  | -6.3 | ZSCAN2  | Homo sapiens zinc finger and SCAN domain containing 2 (ZSCAN2), transcript variant 2, mRNA [NM_017894]   | 54993  |
| A_24_P194730 | -2.0 | -2.1 | -2.1 | -2.2 | ZSCAN22 | Homo sapiens zinc finger and SCAN domain containing 22 (ZSCAN22), mRNA [NM_181846]                       | 342945 |

|              |      |      |       |      |         |                                                                                       |           |
|--------------|------|------|-------|------|---------|---------------------------------------------------------------------------------------|-----------|
| A_24_P942730 | -2.1 | 1.0  | 1.0   | 1.0  | ZSCAN29 | Homo sapiens zinc finger and SCAN domain containing 29 (ZSCAN29), mRNA [NM_152455]    | 146050    |
| A_23_P100092 | 1.3  | 1.0  | -1.7  | -2.4 | ZSCAN29 | Homo sapiens zinc finger and SCAN domain containing 29 (ZSCAN29), mRNA [NM_152455]    | 146050    |
| A_23_P78429  | -2.1 | -2.2 | -2.3  | -2.4 | ZSCAN30 | Homo sapiens zinc finger and SCAN domain containing 30 (ZSCAN30), mRNA [NM_001166012] | 100101467 |
| A_23_P90233  | -1.9 | -2.9 | -11.3 | -1.8 | ZSCAN5A | Homo sapiens zinc finger and SCAN domain containing 5A (ZSCAN5A), mRNA [NM_024303]    | 79149     |

|              |      |      |      |      |        |                                                                                                   |        |
|--------------|------|------|------|------|--------|---------------------------------------------------------------------------------------------------|--------|
| A_23_P165984 | -4.3 | 1.6  | -1.1 | -1.1 | ZSWIM3 | Homo sapiens zinc finger, SWIM-type containing 3 (ZSWIM3), transcript variant 1, mRNA [NM_080752] | 140831 |
| A_23_P383118 | -6.3 | 1.1  | 1.2  | 1.1  | ZSWIM5 | Homo sapiens zinc finger, SWIM-type containing 5 (ZSWIM5), mRNA [NM_020883]                       | 57643  |
| A_32_P109522 | 12.1 | 12.0 | 17.2 | 13.3 | ZUFSP  | Homo sapiens zinc finger with UFM1-specific peptidase domain (ZUFSP), mRNA [NM_145062]            | 221302 |

|              |      |      |      |       |        |                                                                                |        |
|--------------|------|------|------|-------|--------|--------------------------------------------------------------------------------|--------|
| A_24_P925940 | 1.0  | 1.0  | -4.2 | -1.4  | ZXDC   | Homo sapiens clone DNA108719 SERH2790 (UNQ2790) mRNA, complete cds. [AY358102] | 79364  |
| A_32_P132589 | -1.0 | -1.0 | -1.1 | -13.6 | ZYG11A | Homo sapiens zyg-11 homolog A (C. elegans) (ZYG11A), mRNA [NM_001004339]       | 440590 |
| A_23_P426140 | 9.5  | 9.7  | 8.6  | 8.9   | ZYG11B | Homo sapiens zyg-11 homolog B (C. elegans) (ZYG11B), mRNA [NM_024646]          | 79699  |
| A_23_P130107 | 3.6  | 2.2  | 1.3  | 2.7   | ZZEF1  | Homo sapiens cDNA FLJ10821 fis, clone NT2RP4001057. [AK001683]                 | 23140  |

|              |      |     |      |      |       |                                                                                   |       |
|--------------|------|-----|------|------|-------|-----------------------------------------------------------------------------------|-------|
| A_24_P282108 | -1.1 | 3.2 | -1.5 | -2.2 | ZZEF1 | Homo sapiens zinc finger, ZZ-type with EF-hand domain 1 (ZZEF1), mRNA [NM_015113] | 23140 |
|--------------|------|-----|------|------|-------|-----------------------------------------------------------------------------------|-------|
